# Supplementary material for: Intron size minimisation in teleosts
Source: PubMed Central journal article supplement (PMC9438311; doi:10.1186/s12864-022-08760-w), 2022-09-01

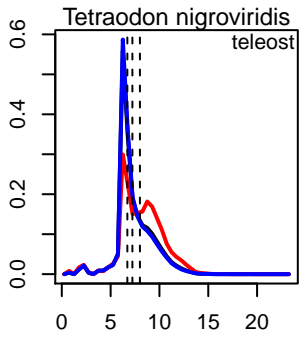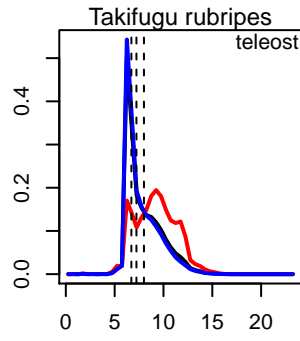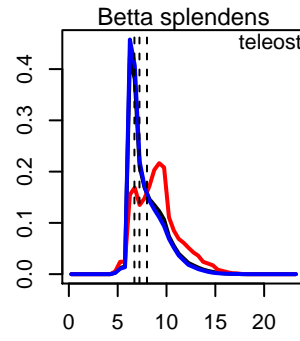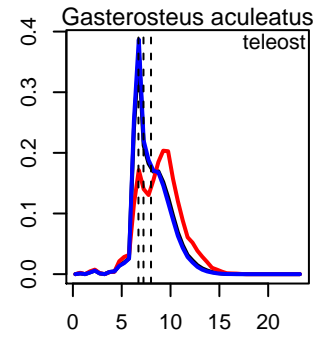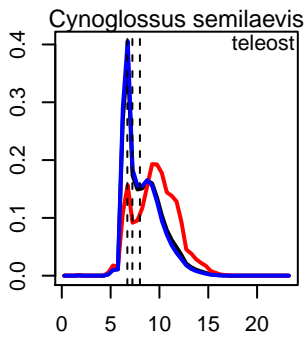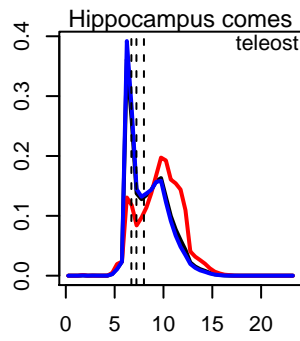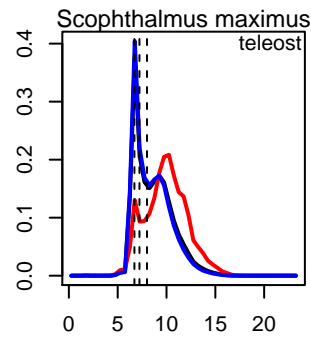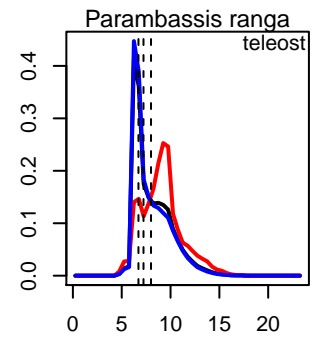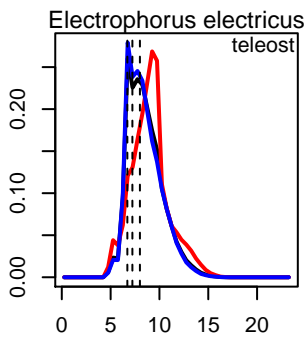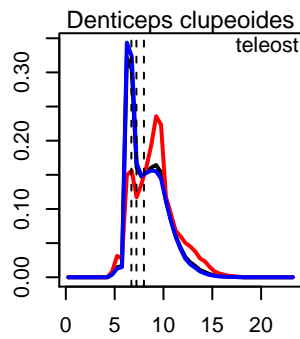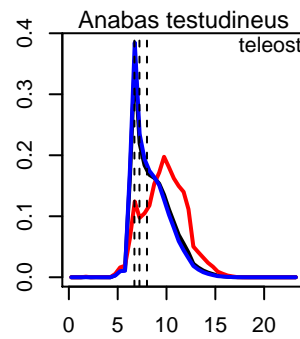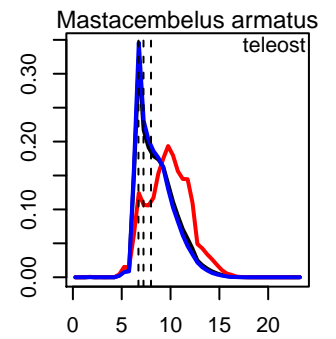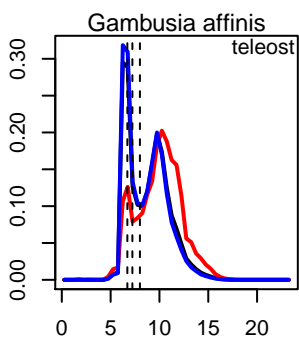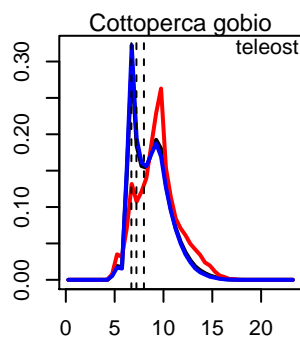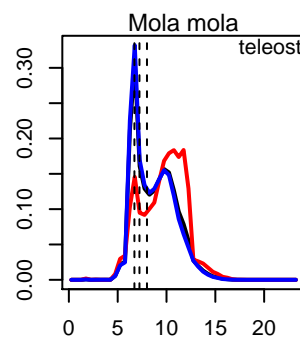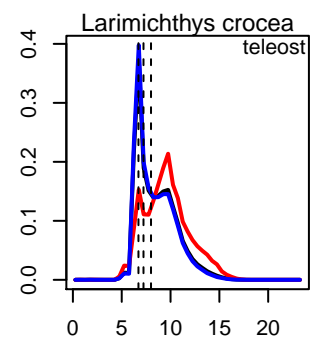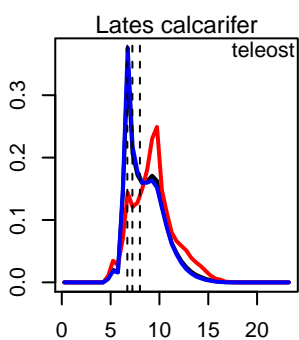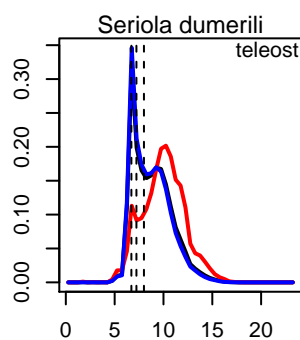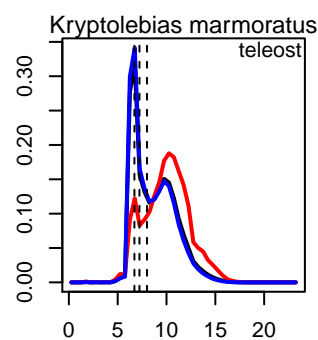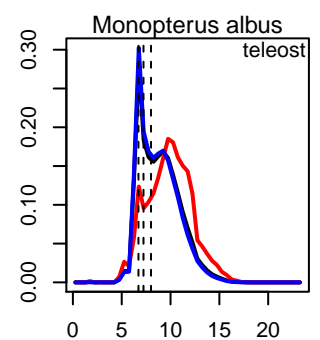

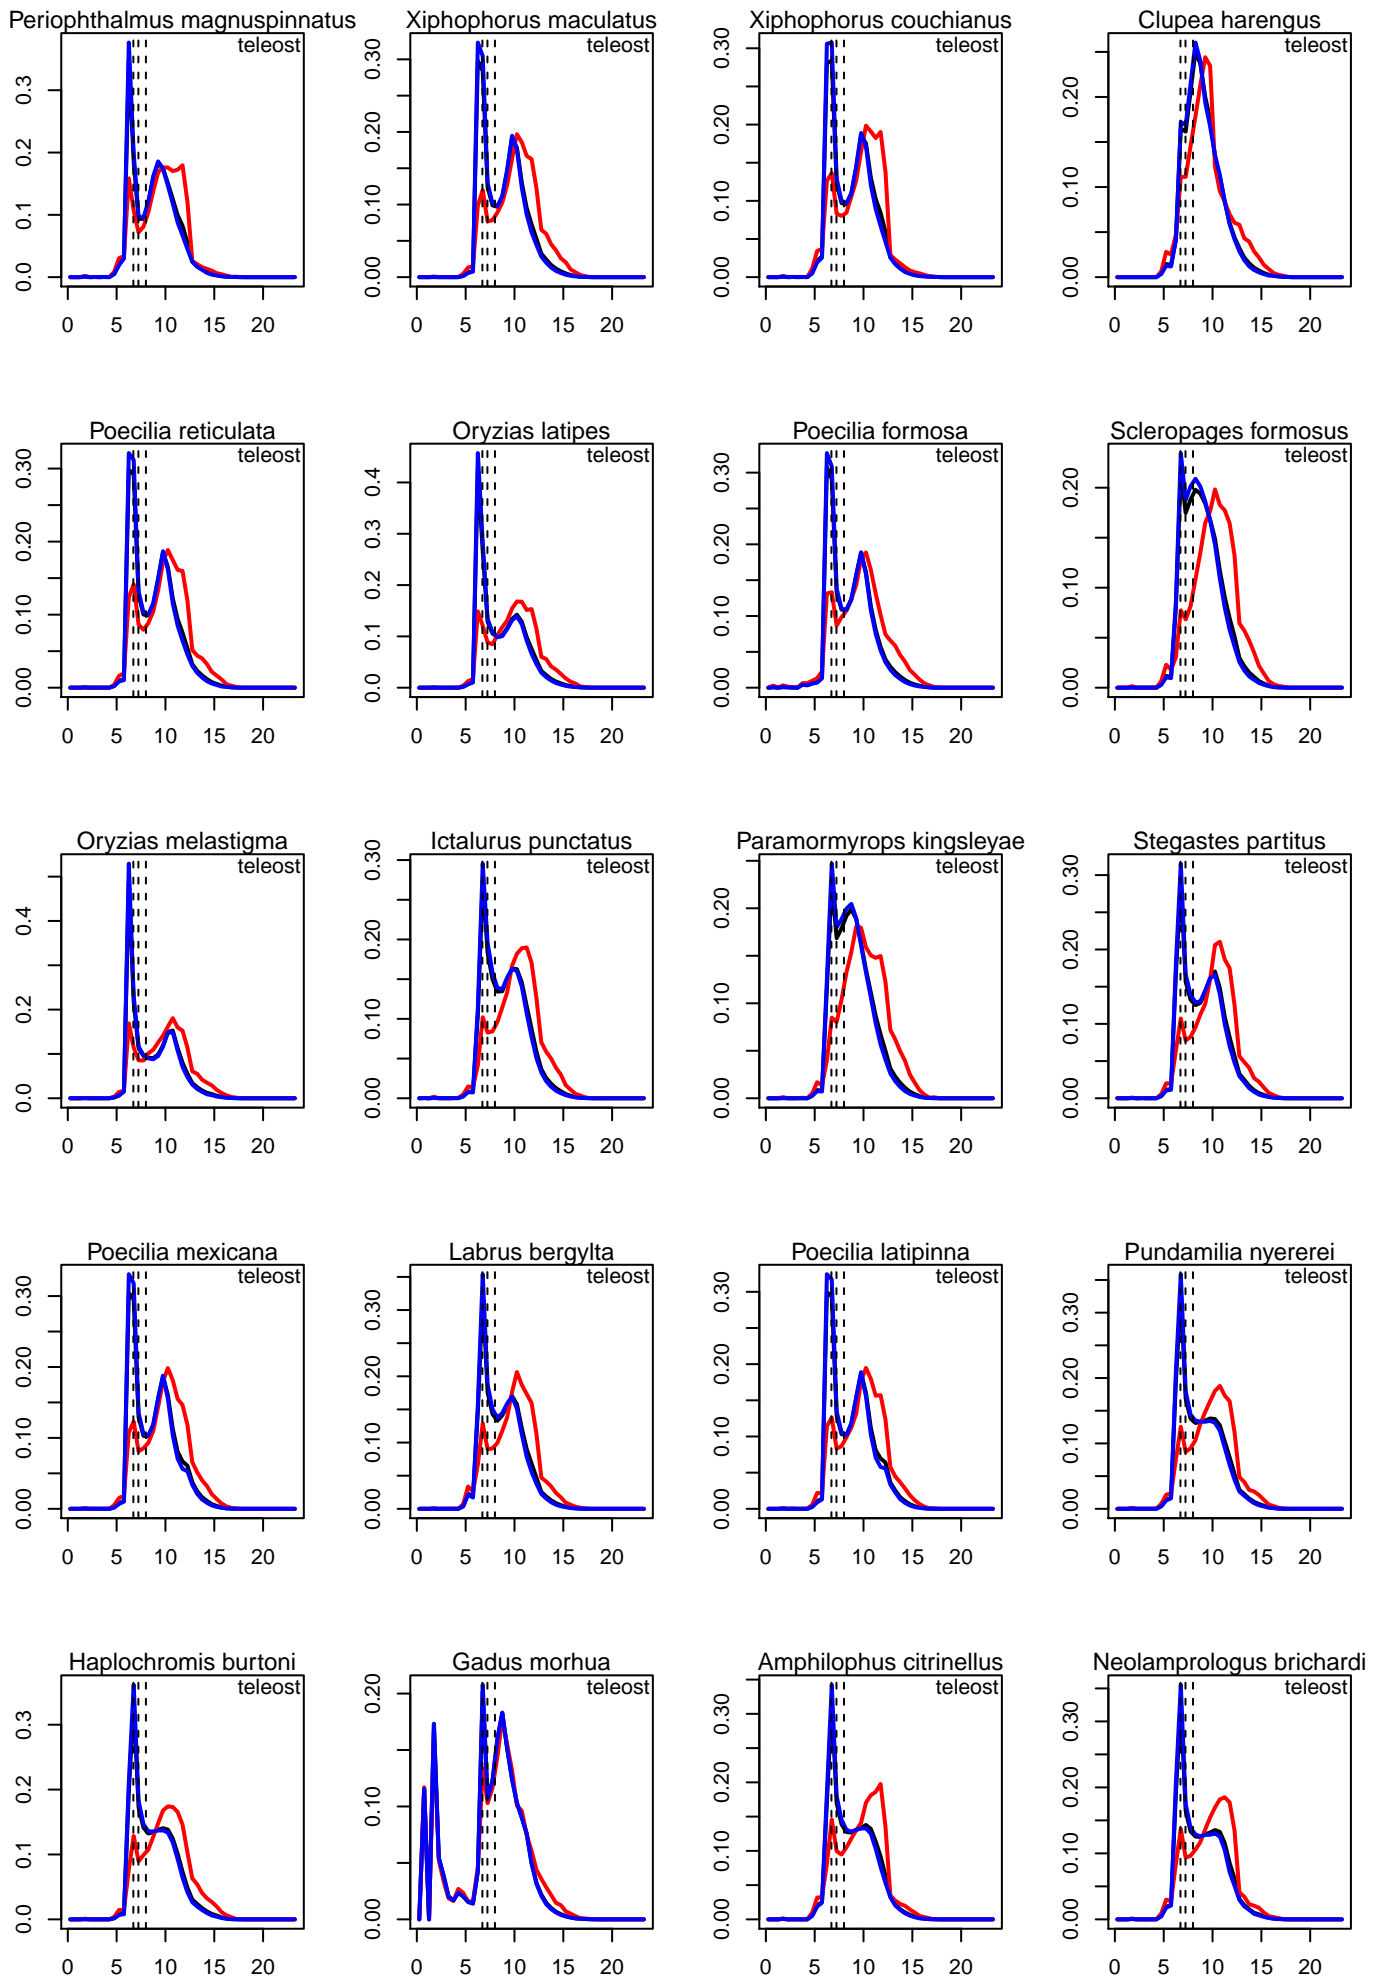

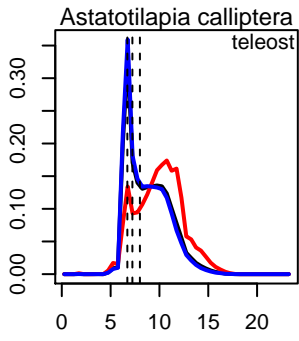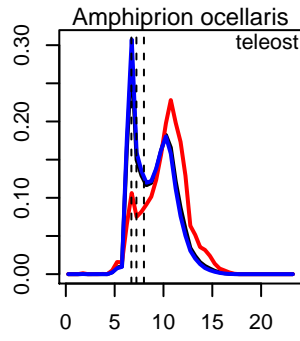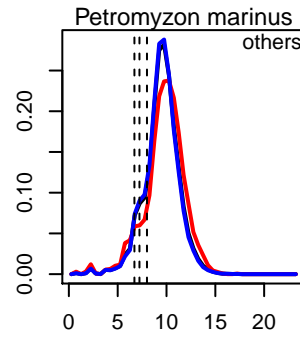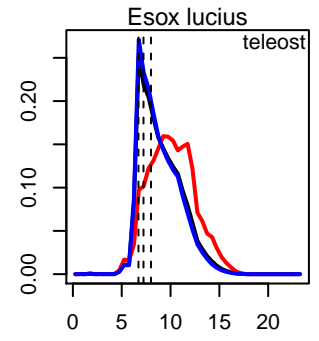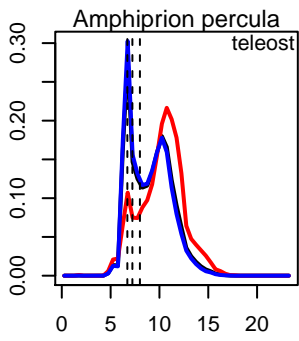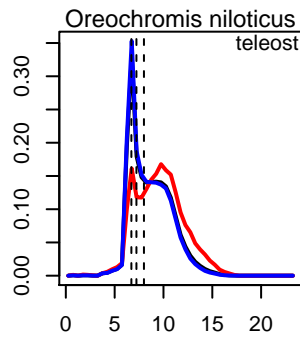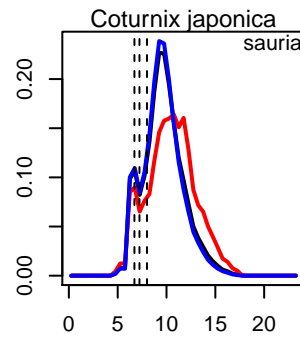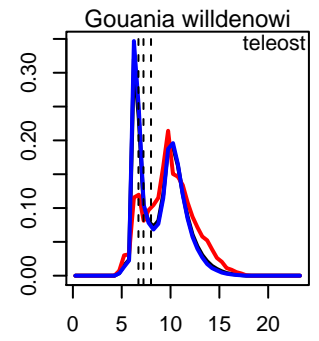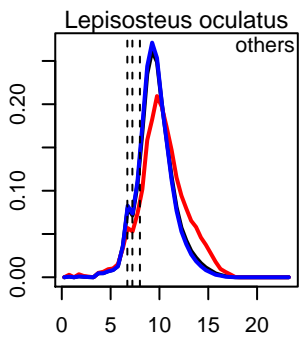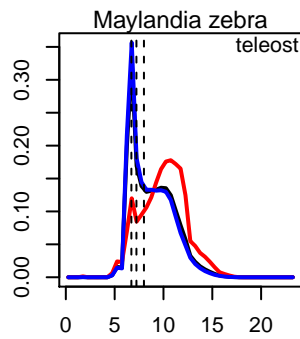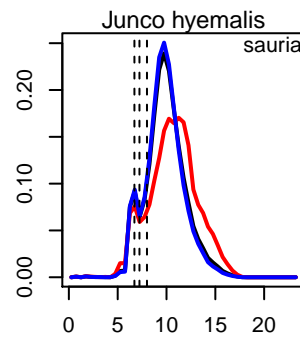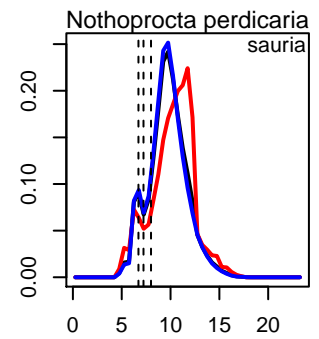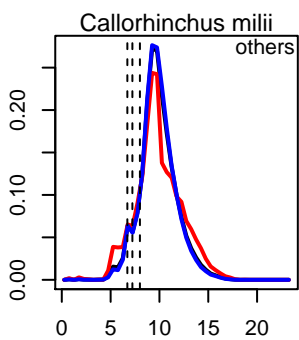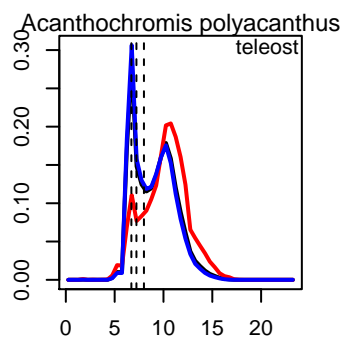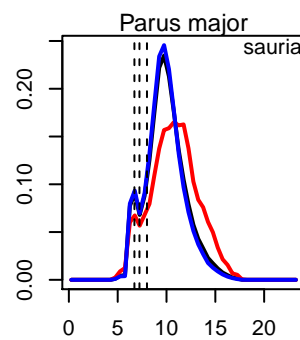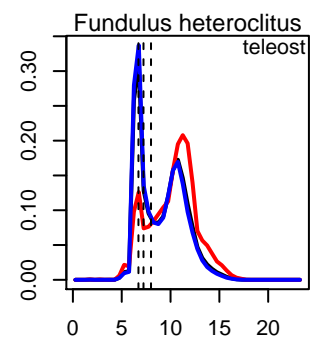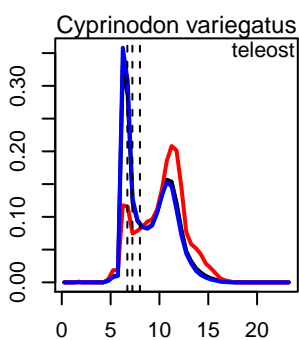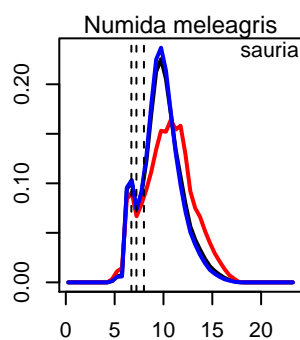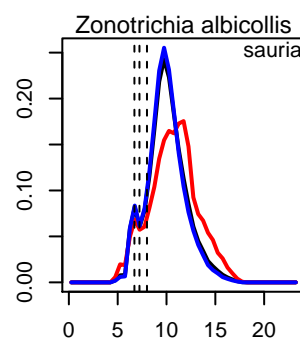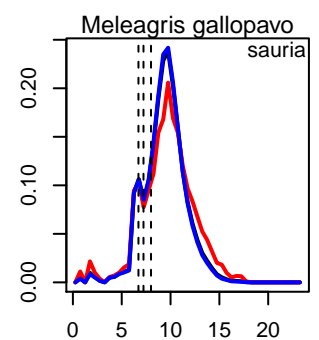

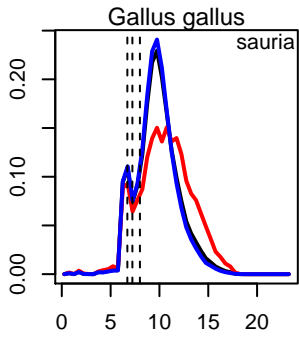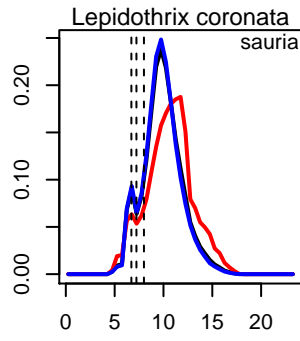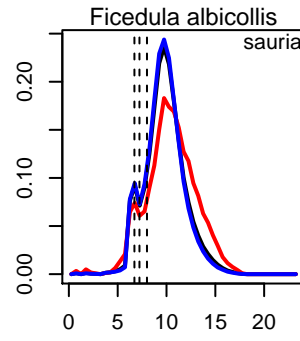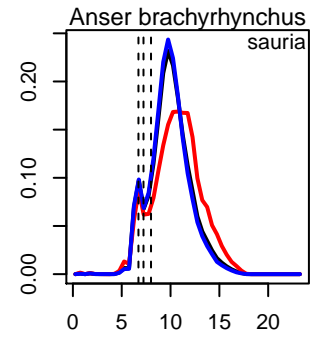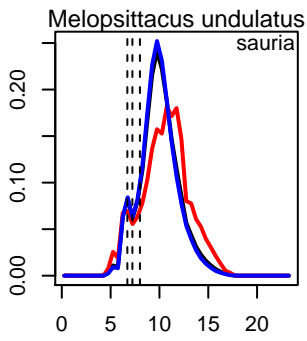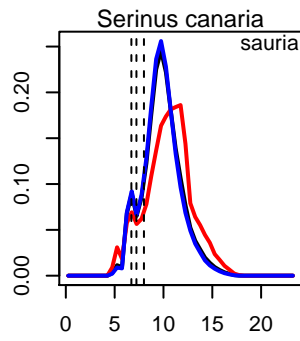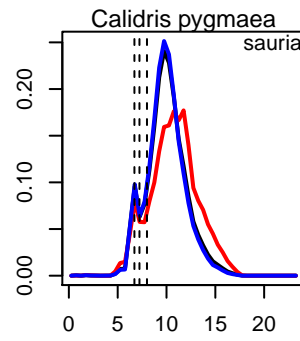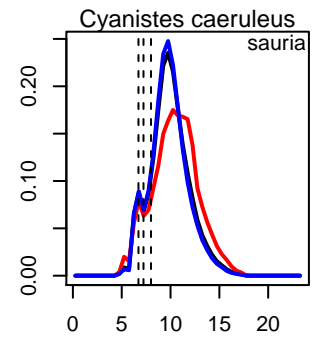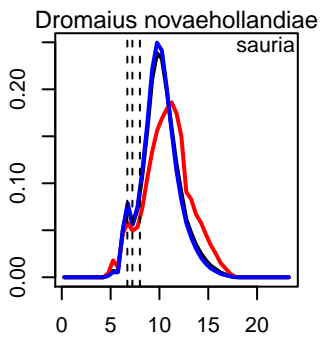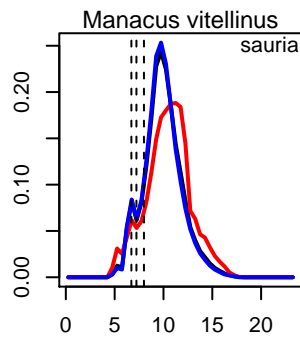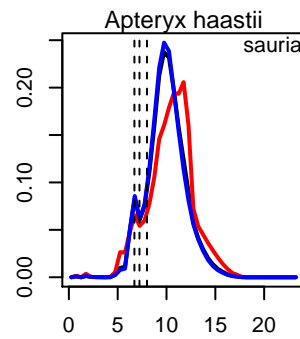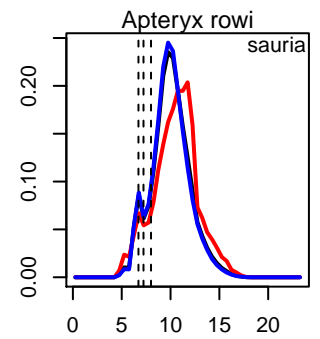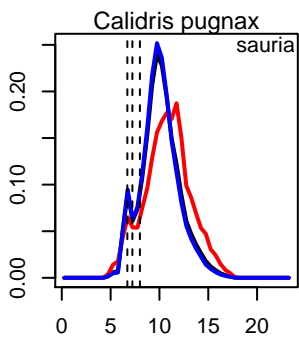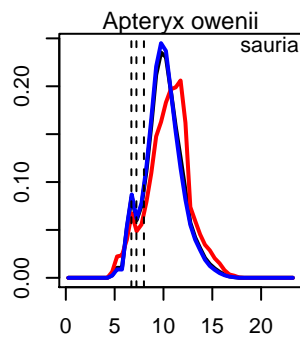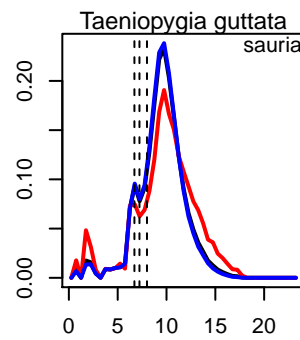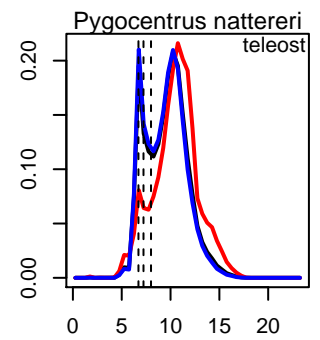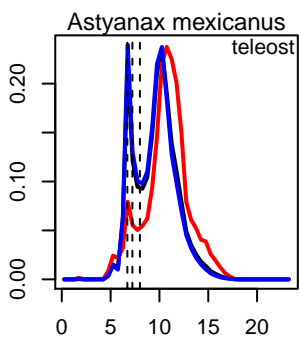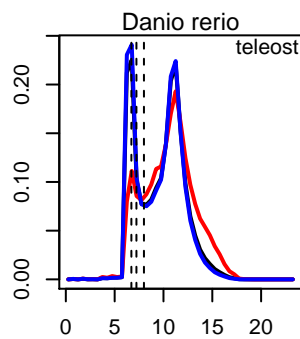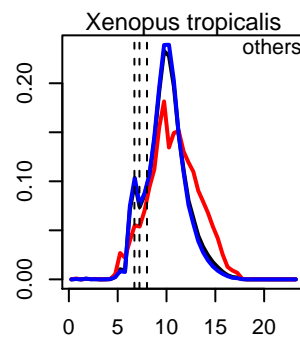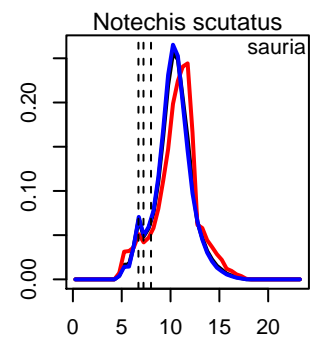

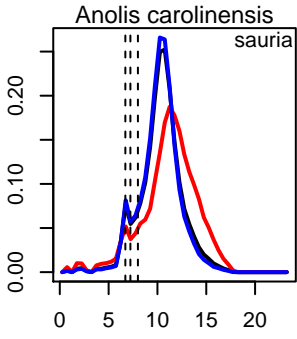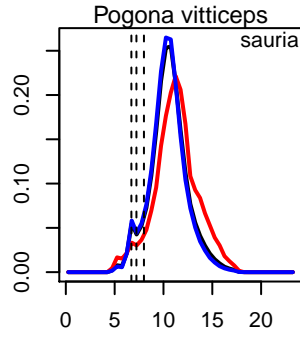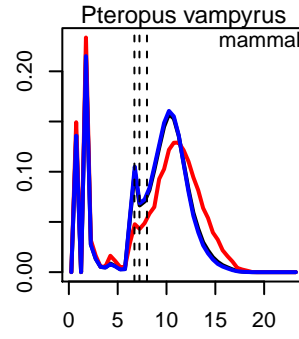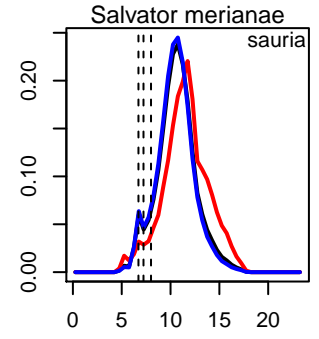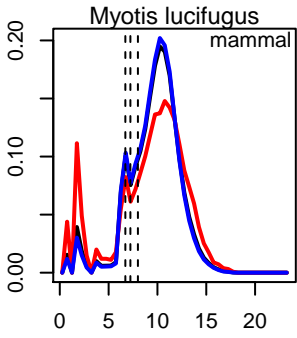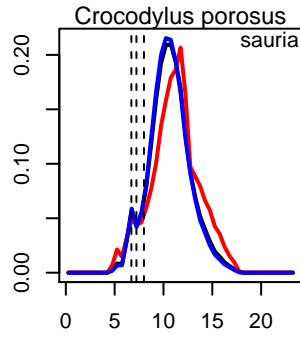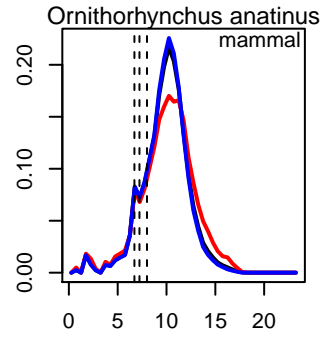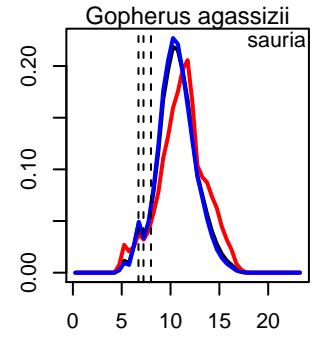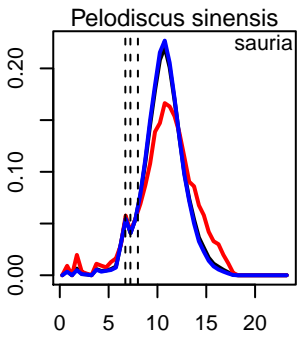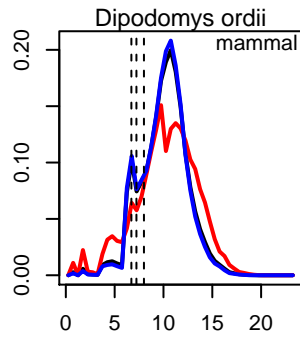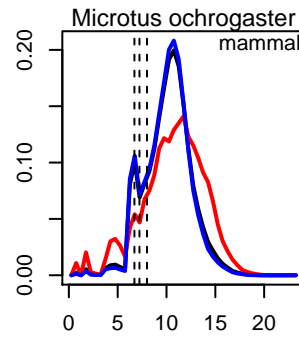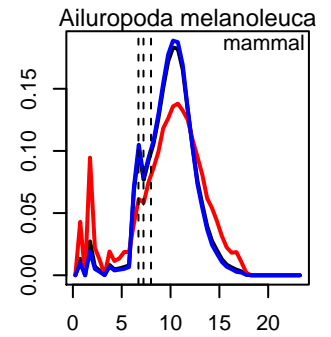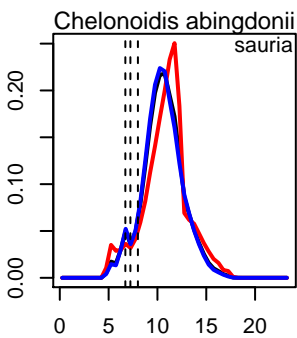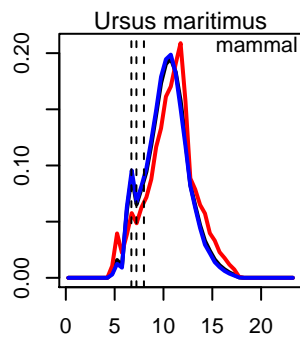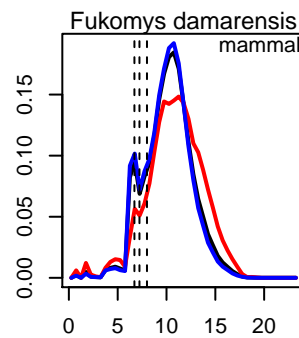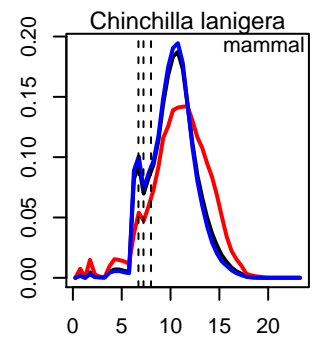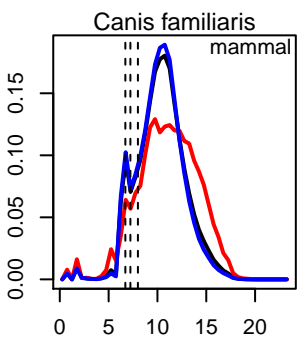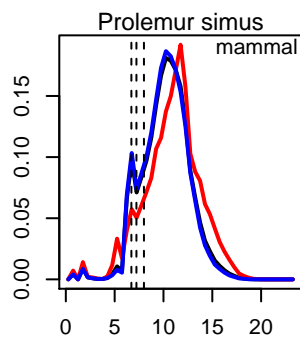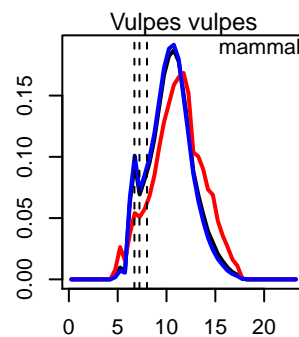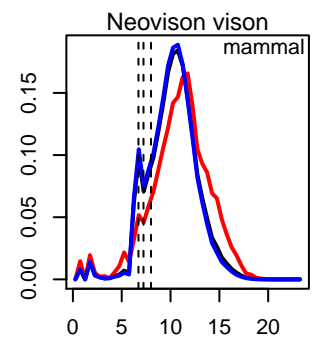



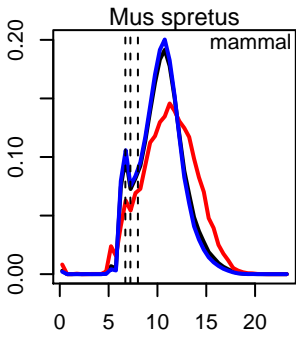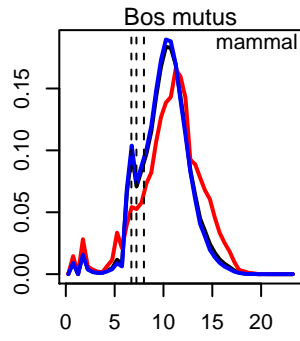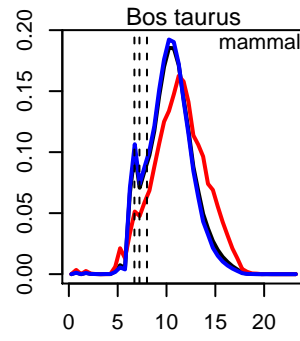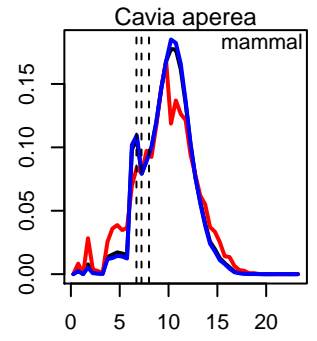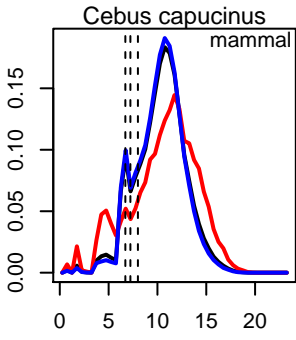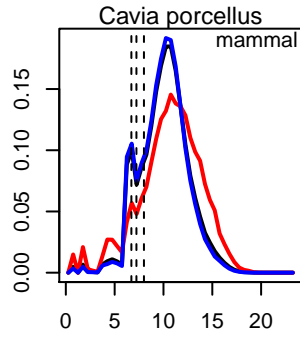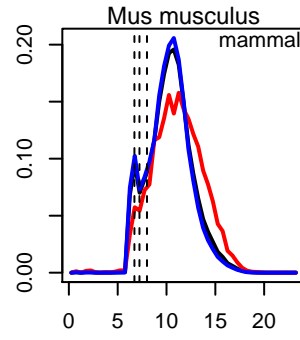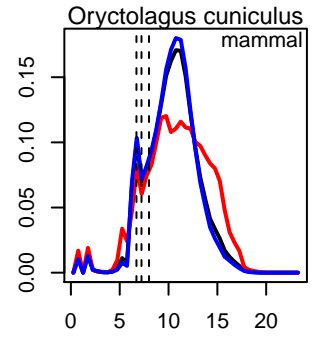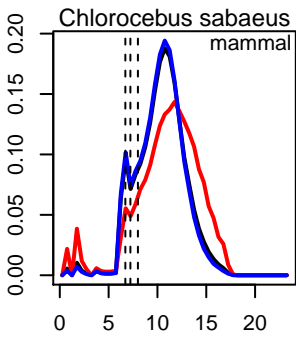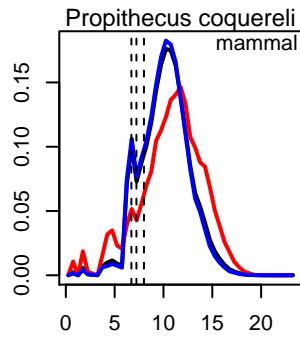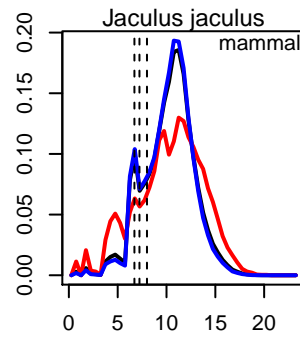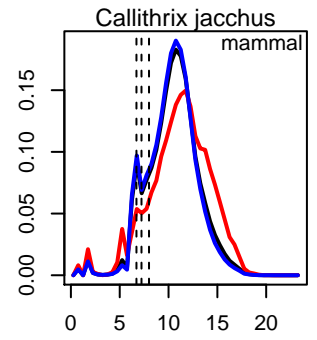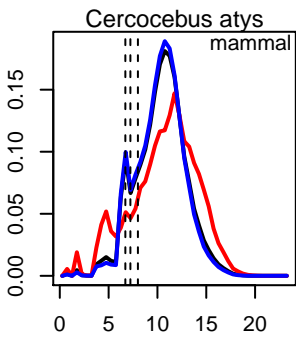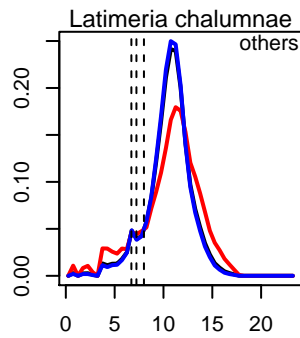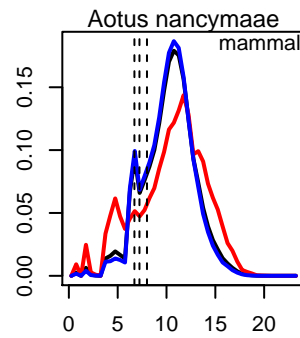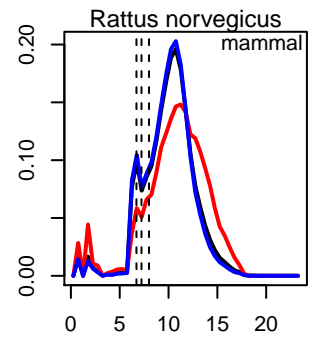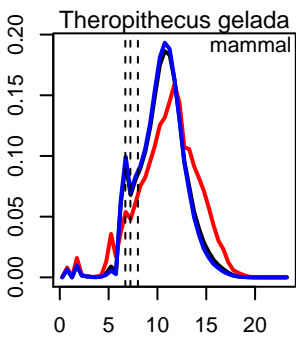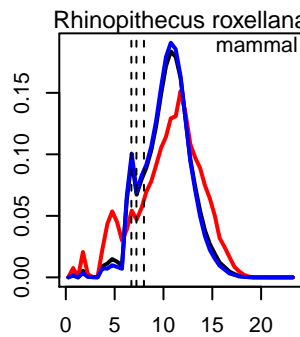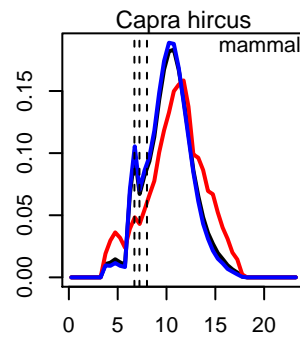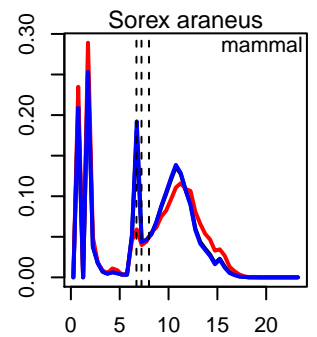

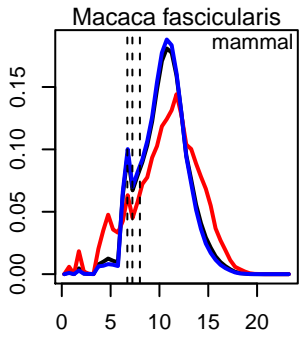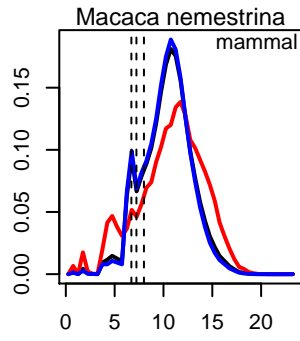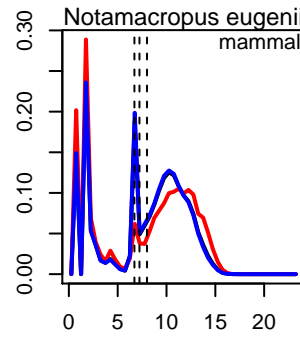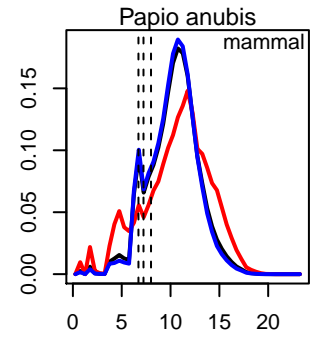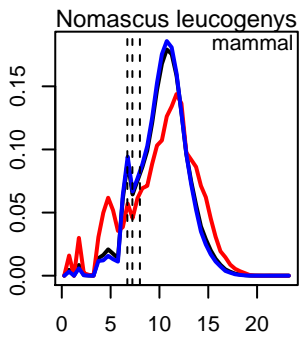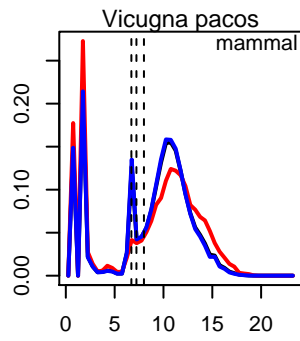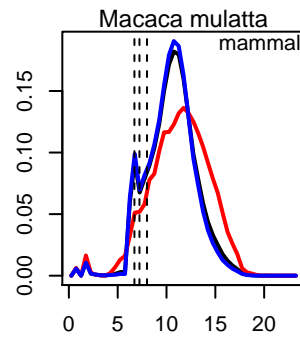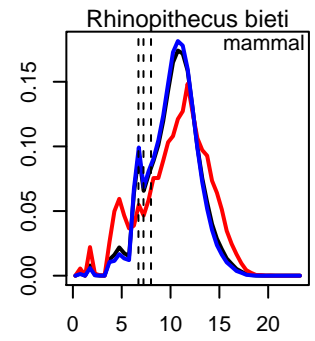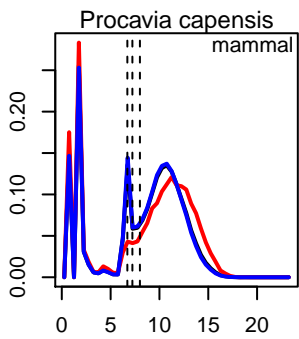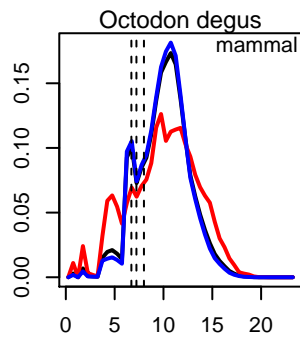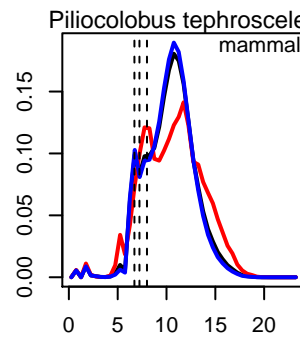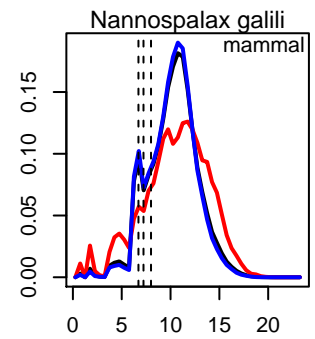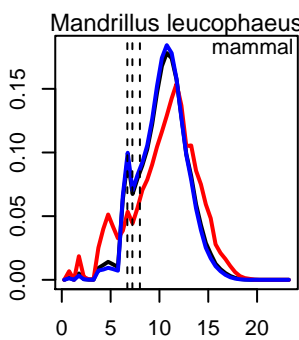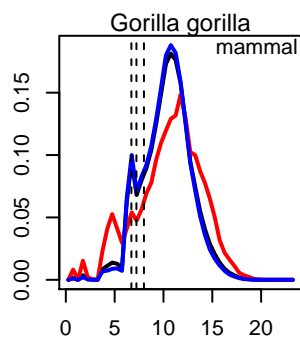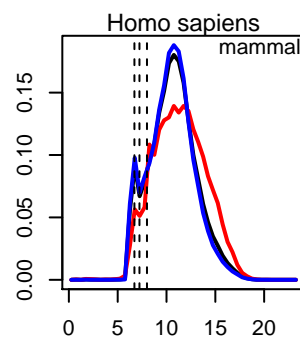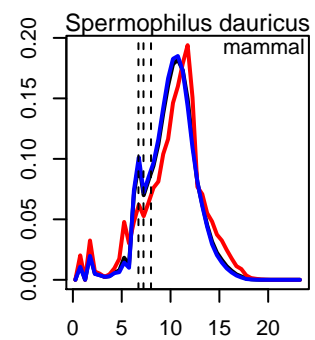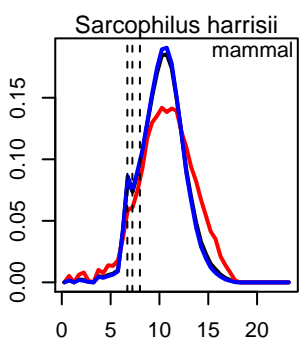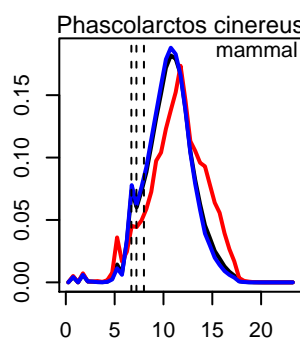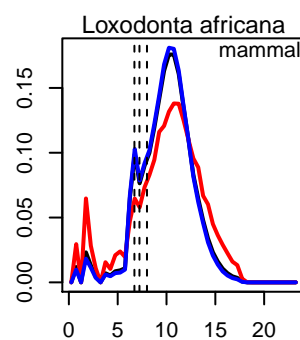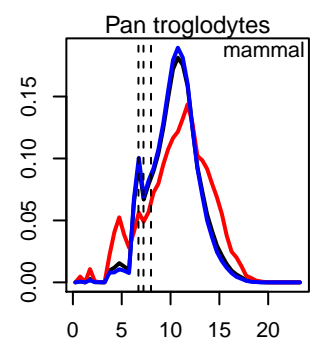



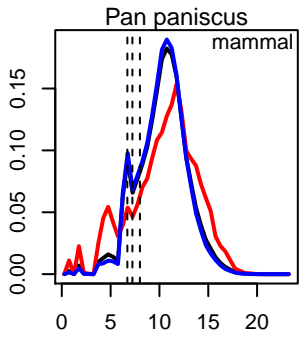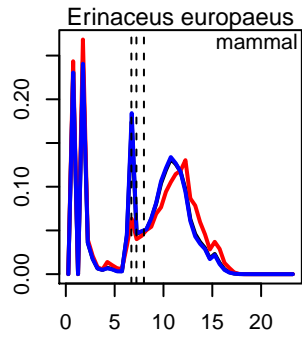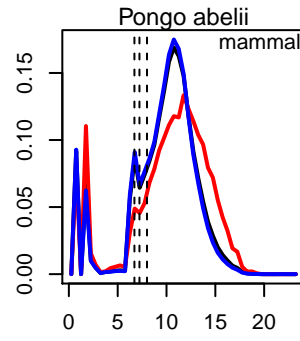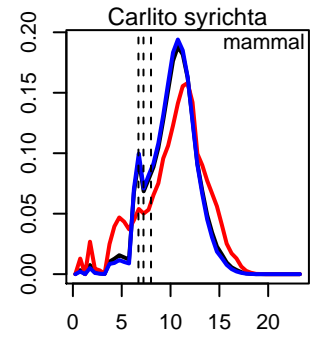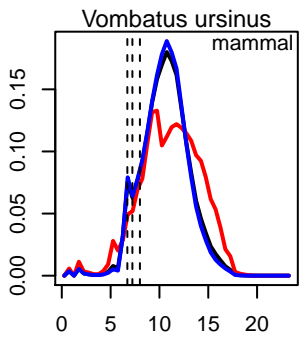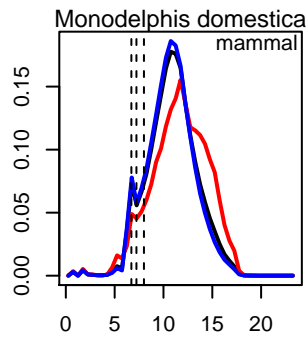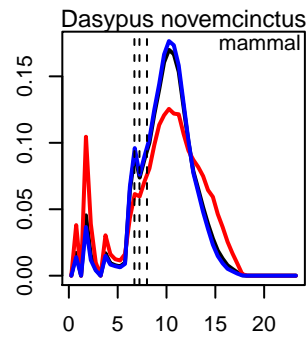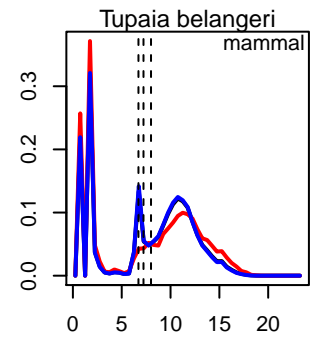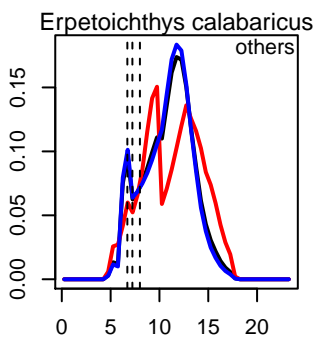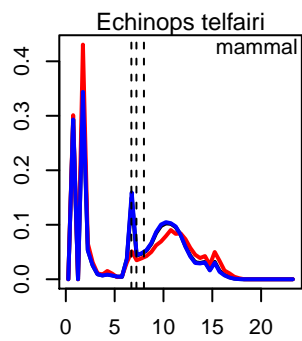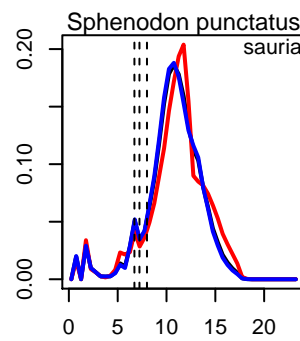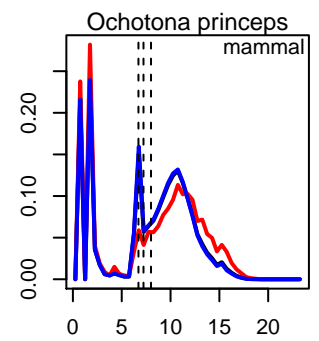

Supplement: 12864_2022_8760_MOESM1_ESM.pdf [file 12864_2022_8760_MOESM1_ESM.pdf]
