# Supplementary material for: Intron size minimisation in teleosts
Source: PubMed Central journal article supplement (PMC9438311; doi:10.1186/s12864-022-08760-w), 2022-09-01

**Callorhynchus milii**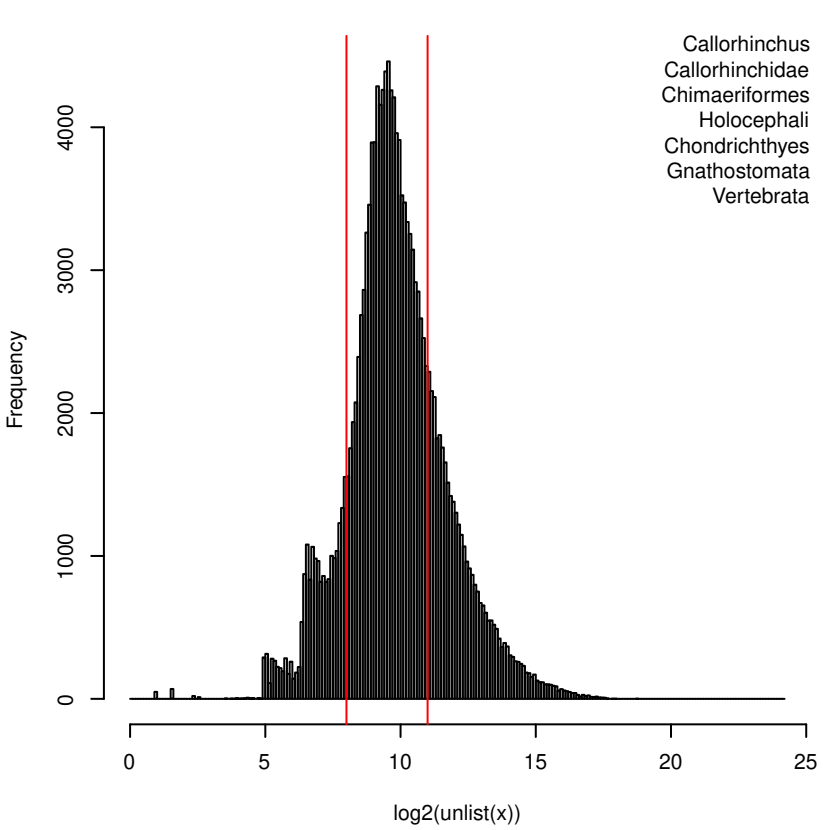**Carassius auratus**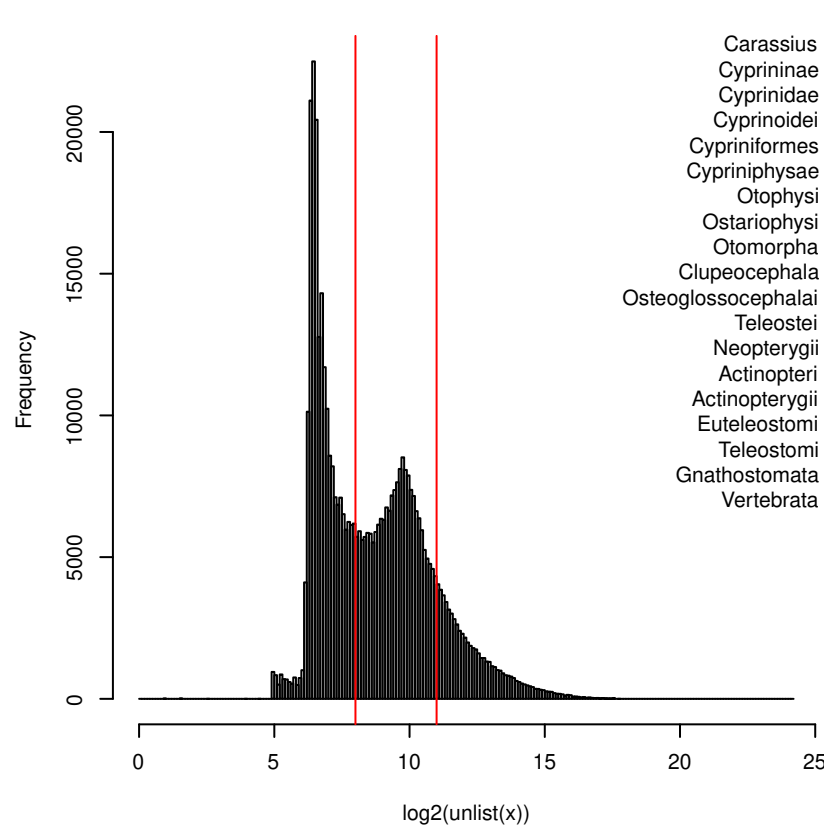**Cyprinus carpio**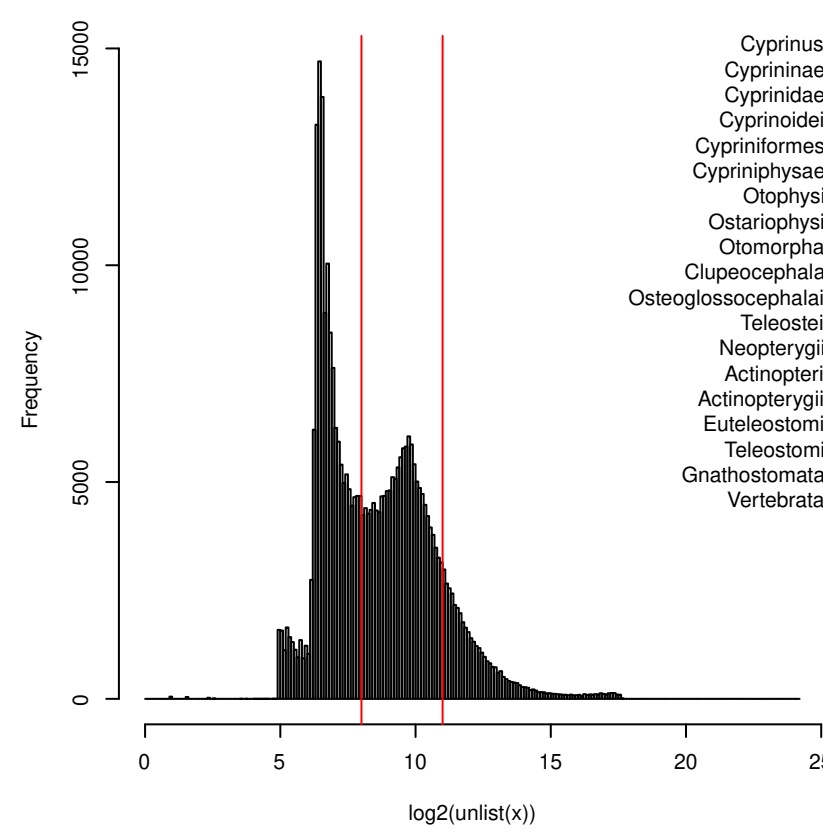**Cyprinus carpio\_germanmirror**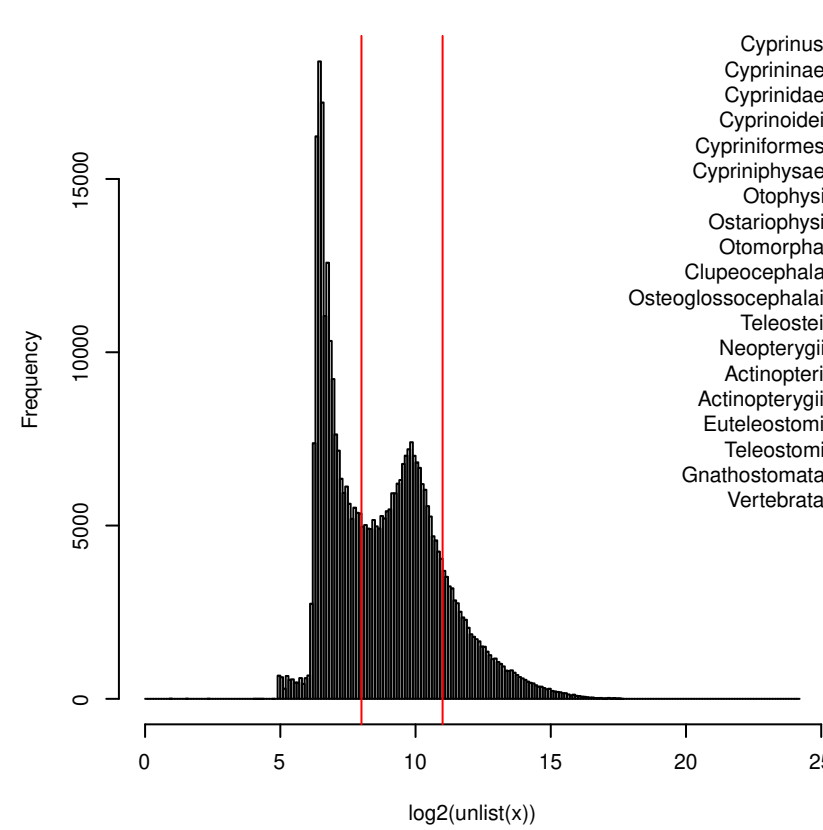**Cyprinus carpio\_hebaored**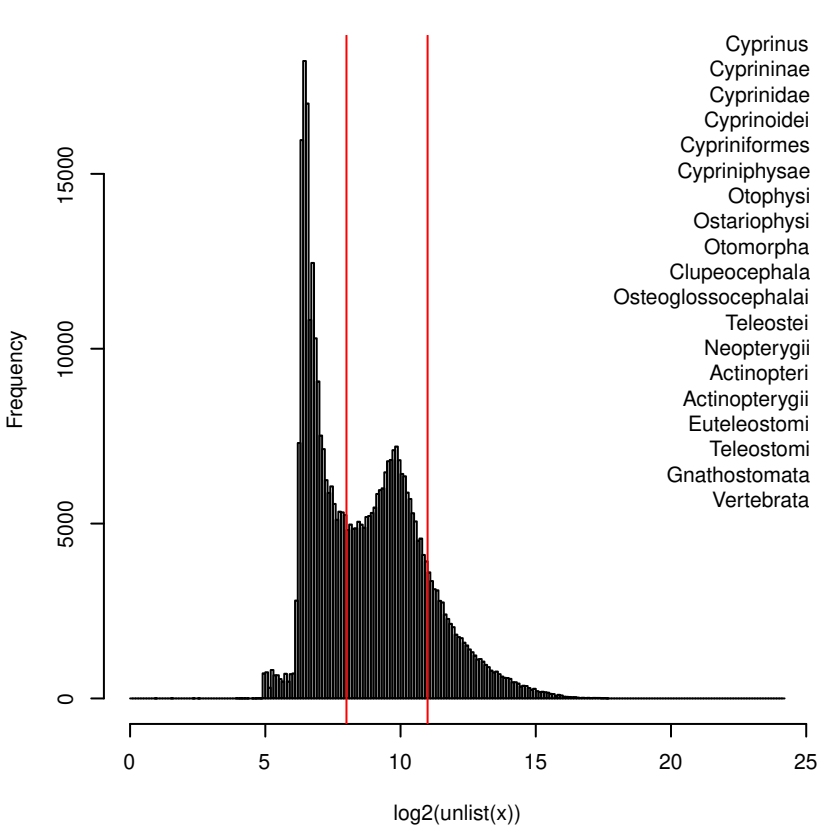**Cyprinus carpio\_huanghe**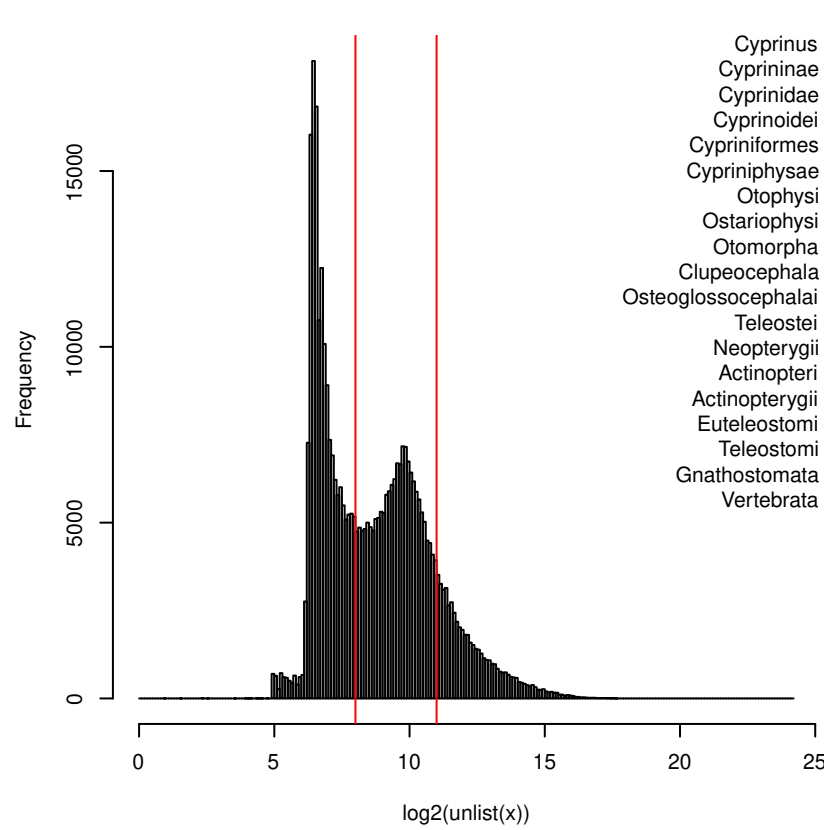**Sinocyclocheilus anshuiensis**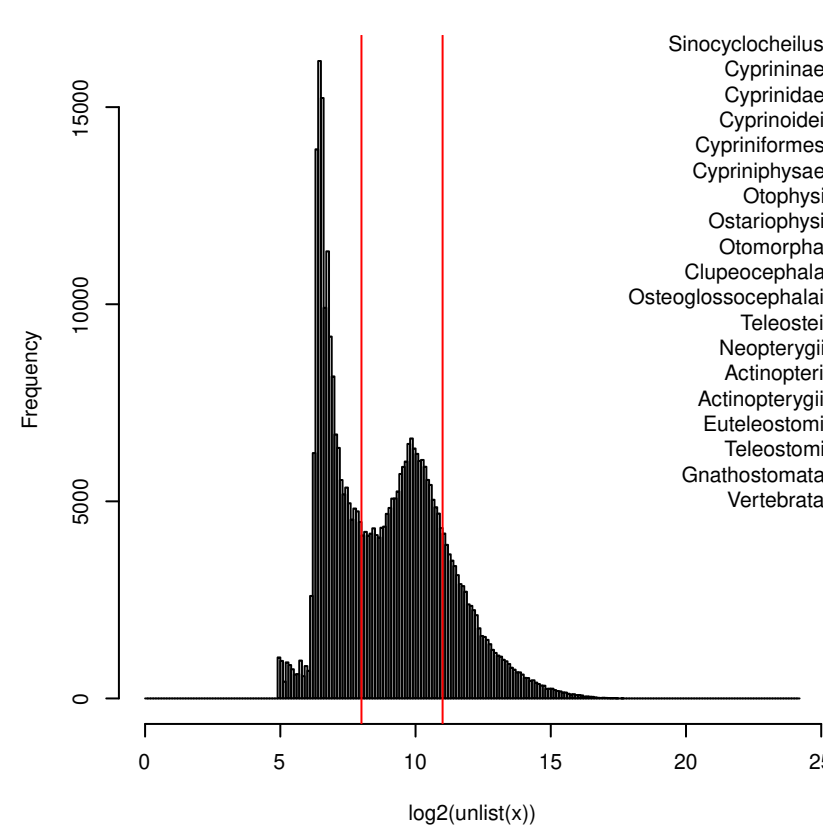**Sinocyclocheilus grahami**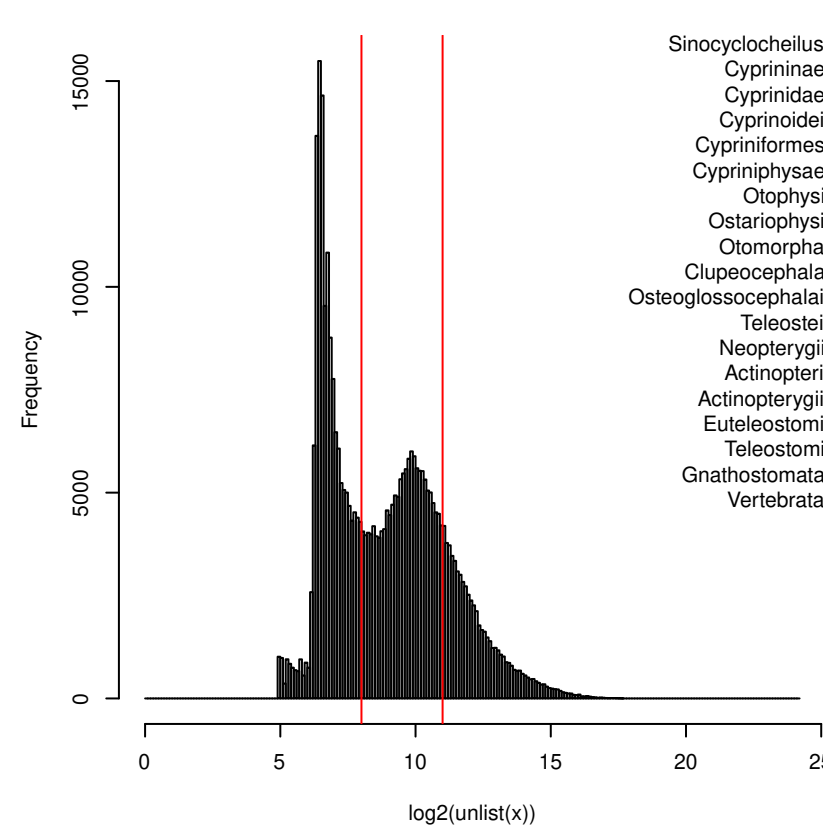**Sinocyclocheilus rhinoceros**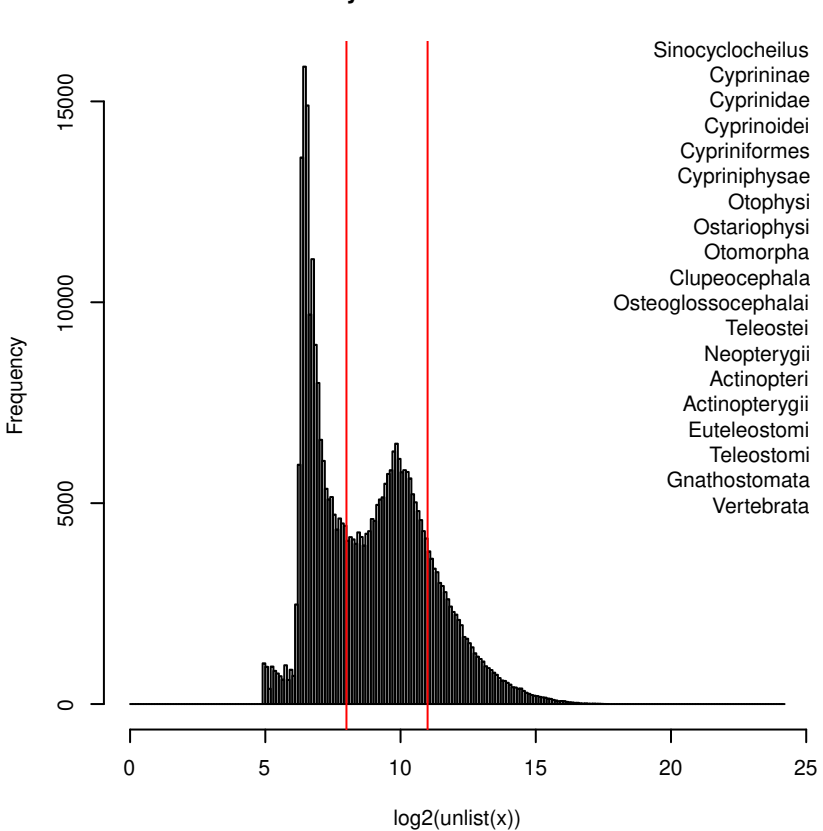**Danio rerio**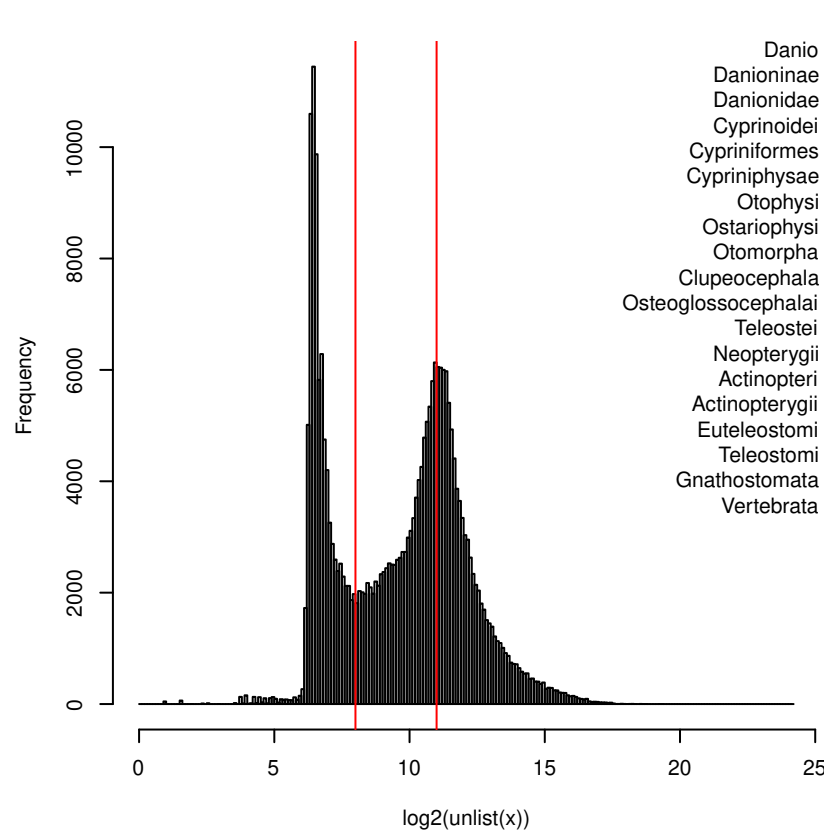**Astyanax mexicanus**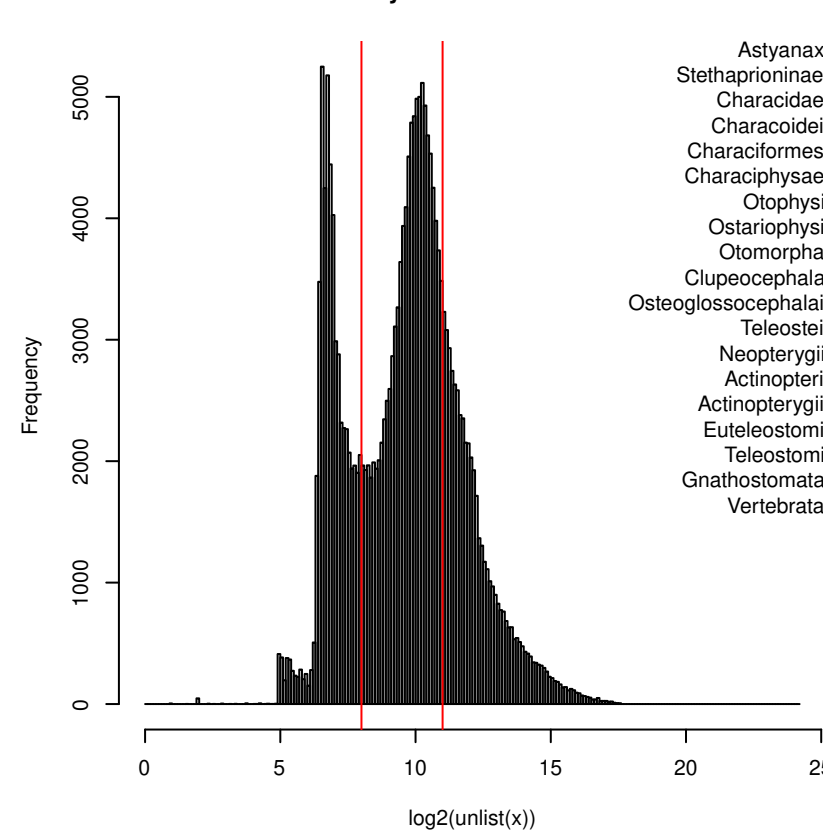**Astyanax mexicanus\_pachon**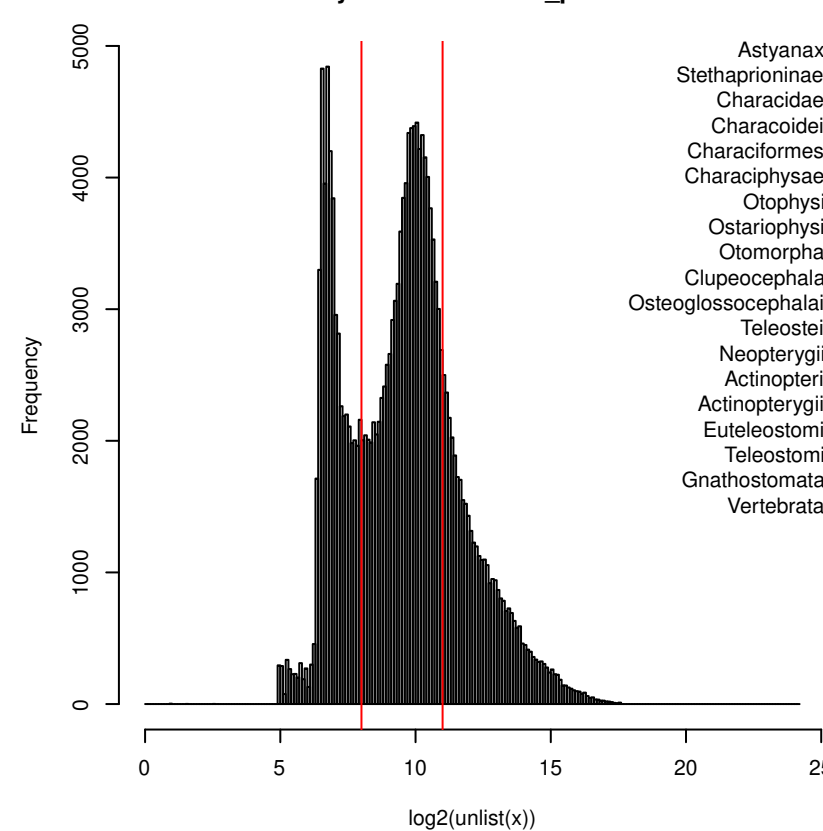**Pygocentrus nattereri**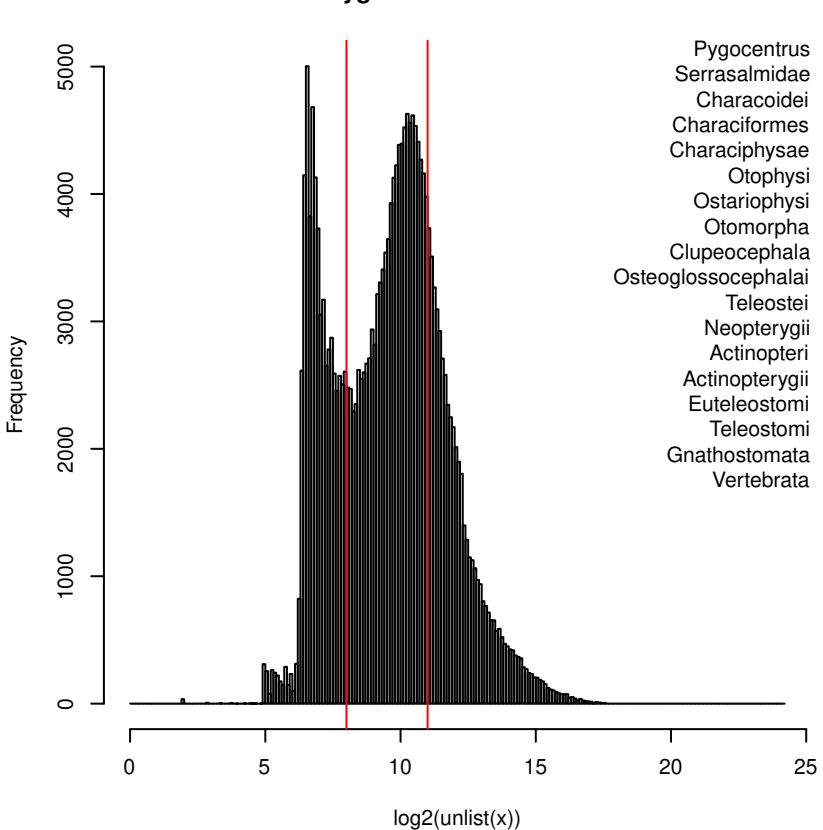**Ictalurus punctatus**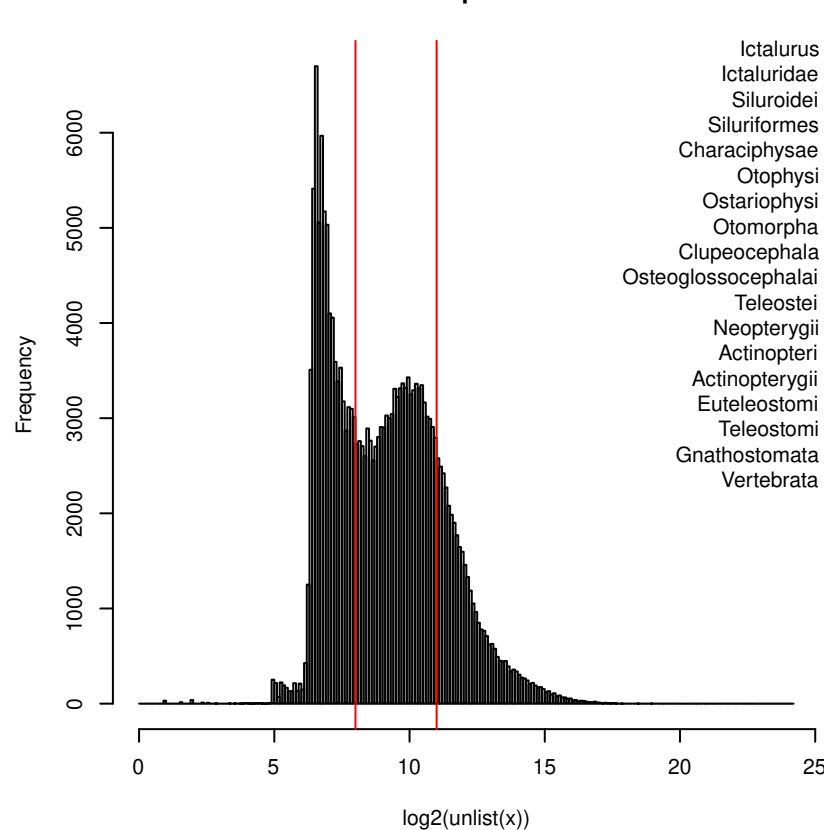**Electrophorus electricus**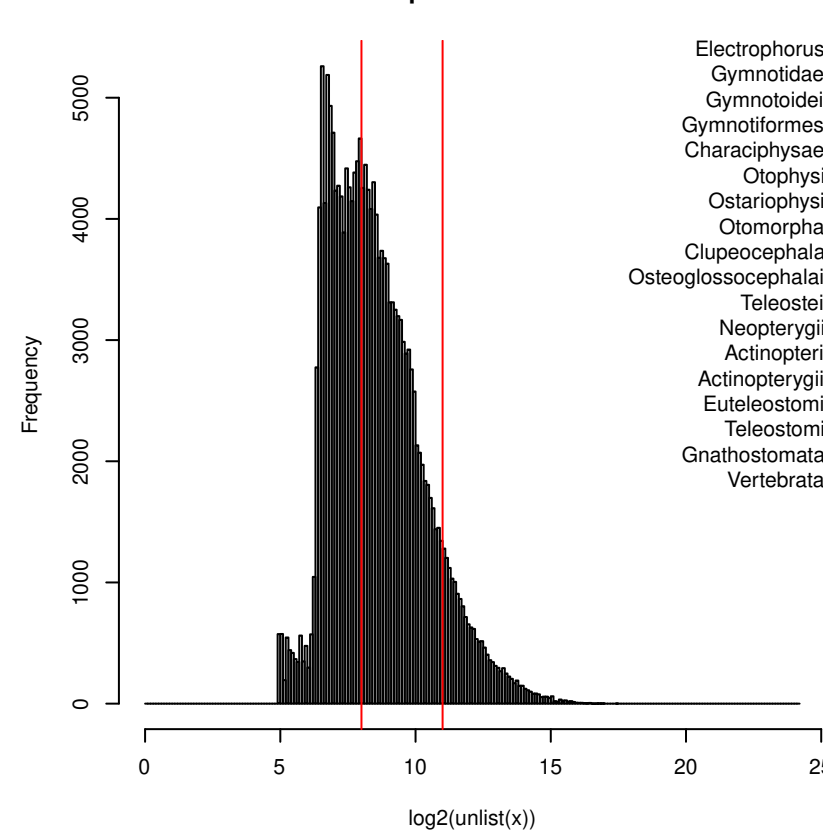**Denticeps clupeioides**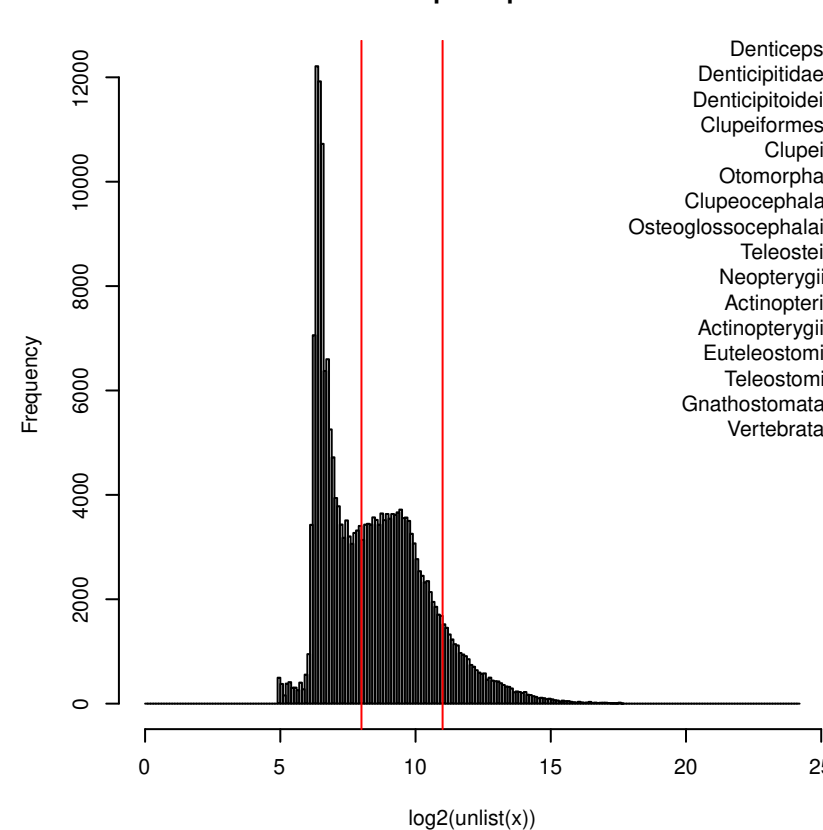**Clupea harengus**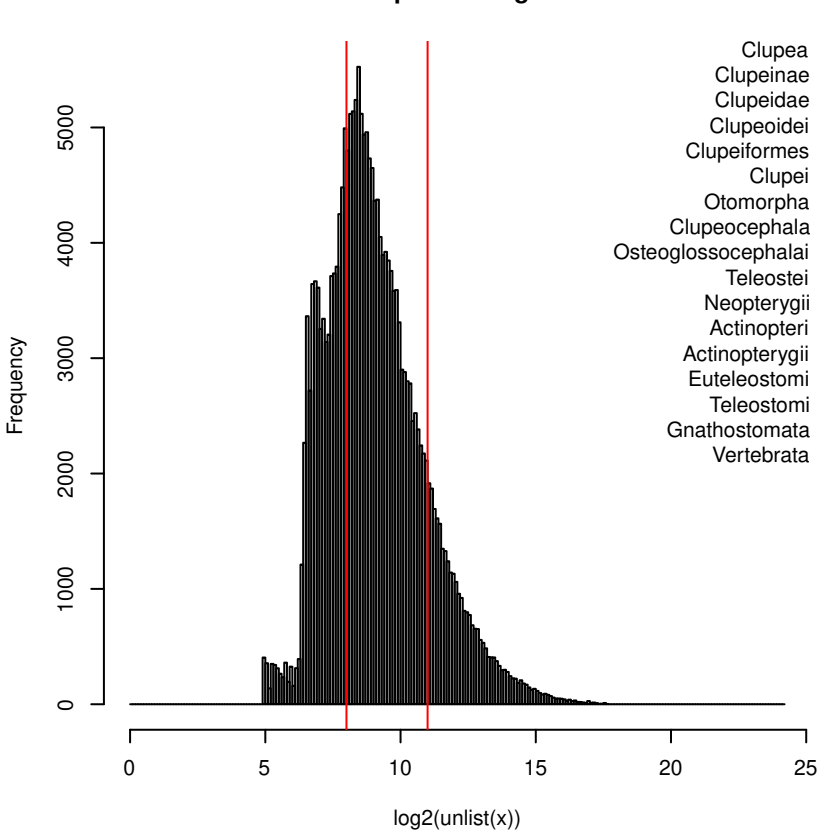**Oncorhynchus kisutch**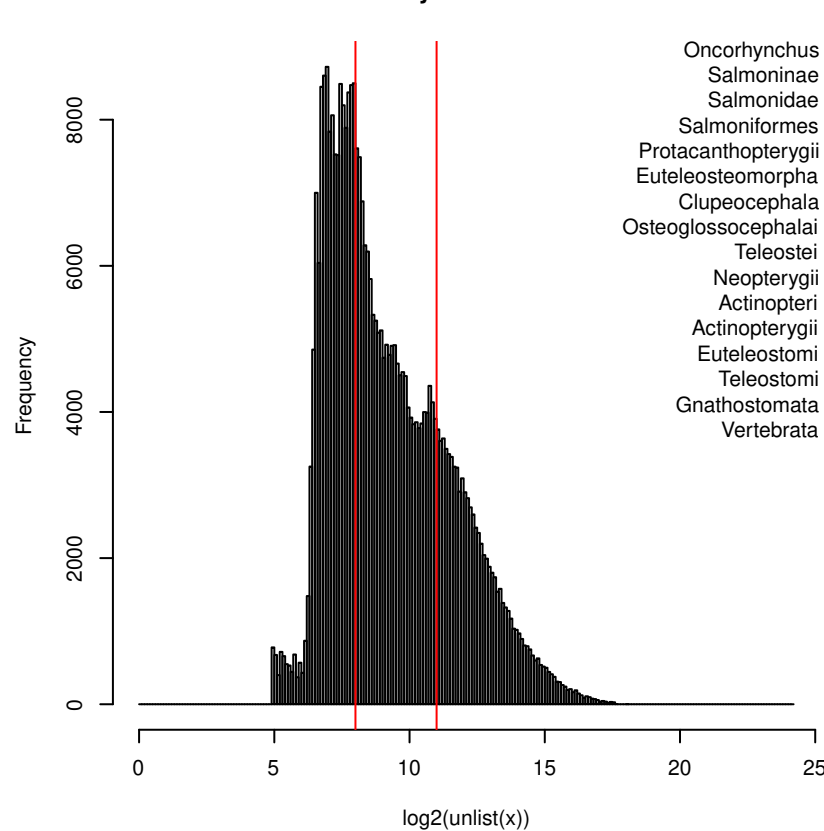**Oncorhynchus mykiss**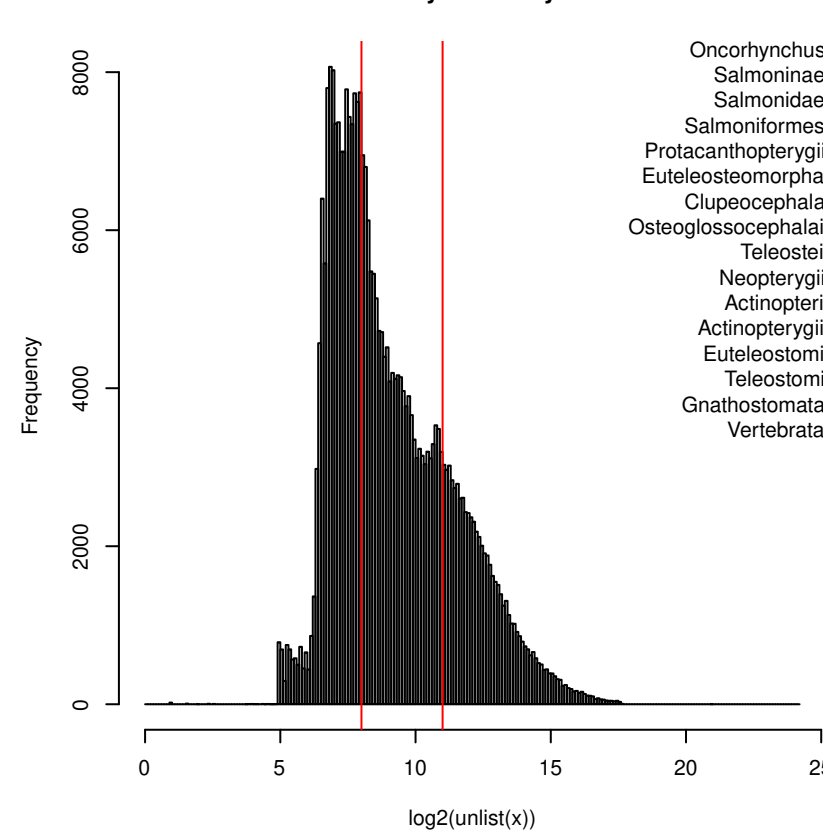**Oncorhynchus tshawytscha**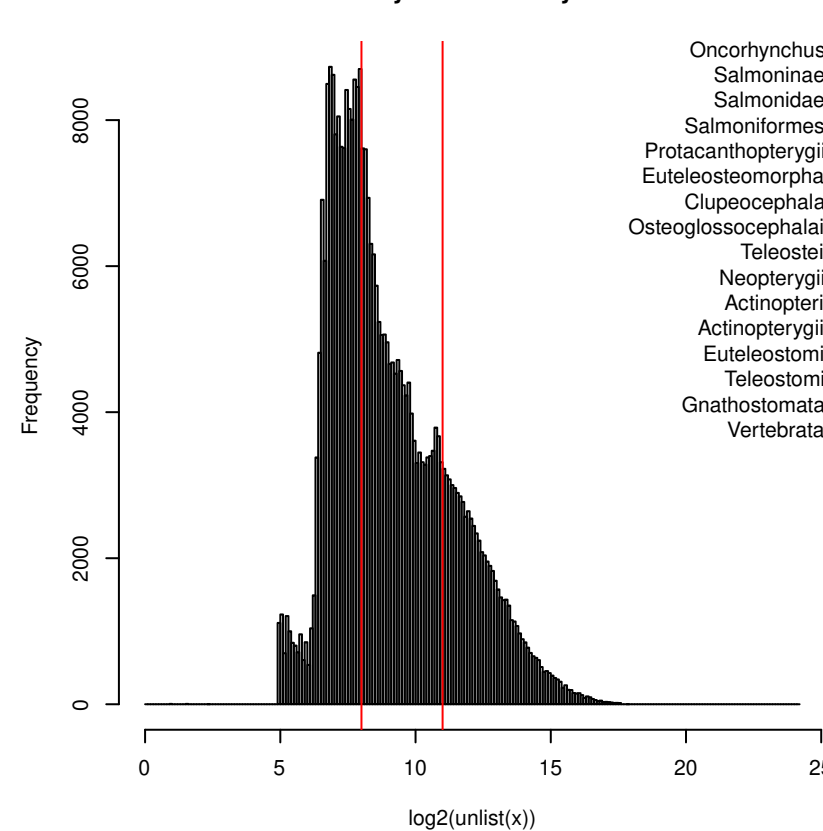









**Labrus bergylla**

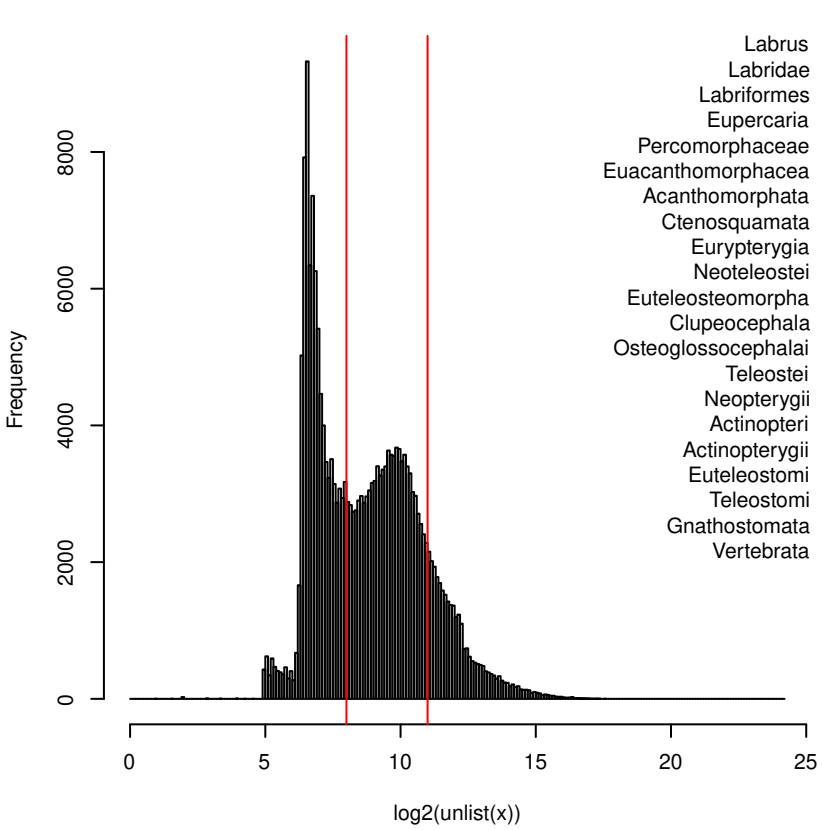

**Sparus aurata**

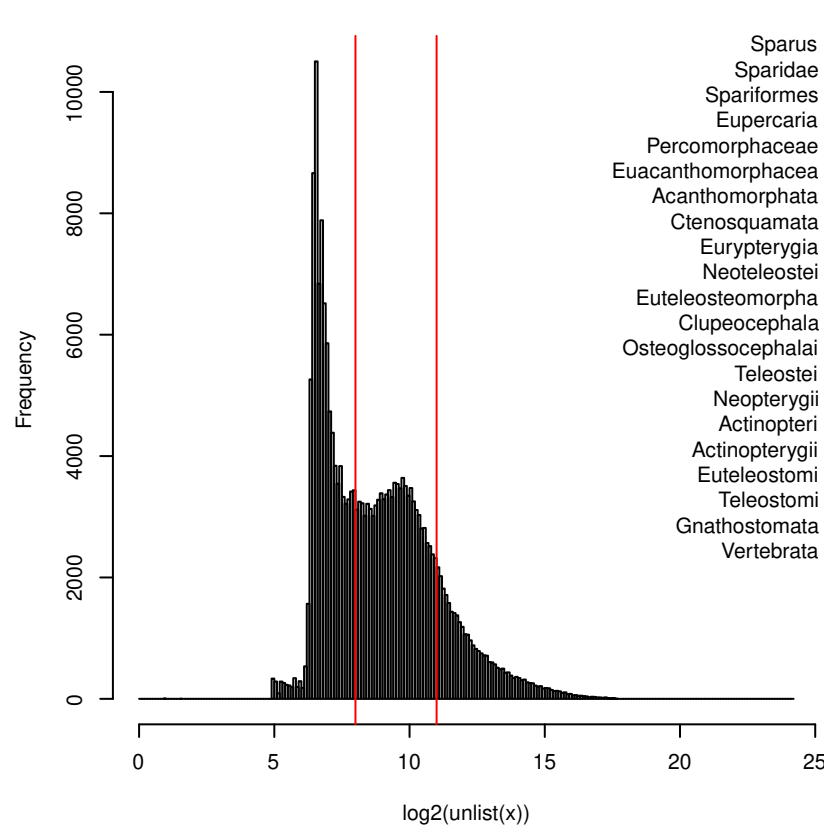

**Gadus morhua**

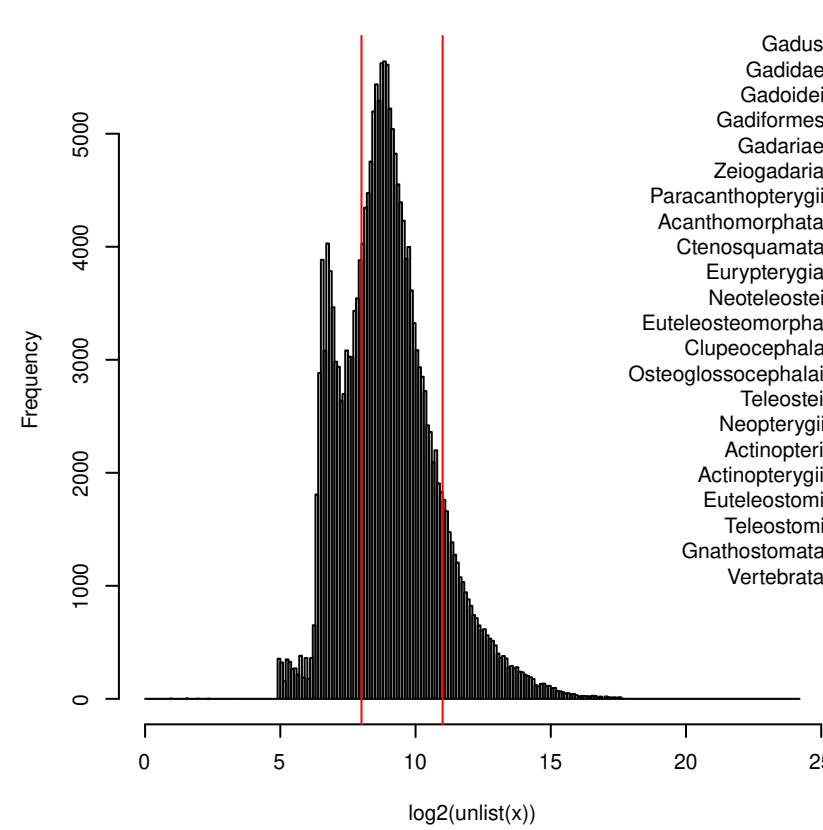

**Scleropages formosus**

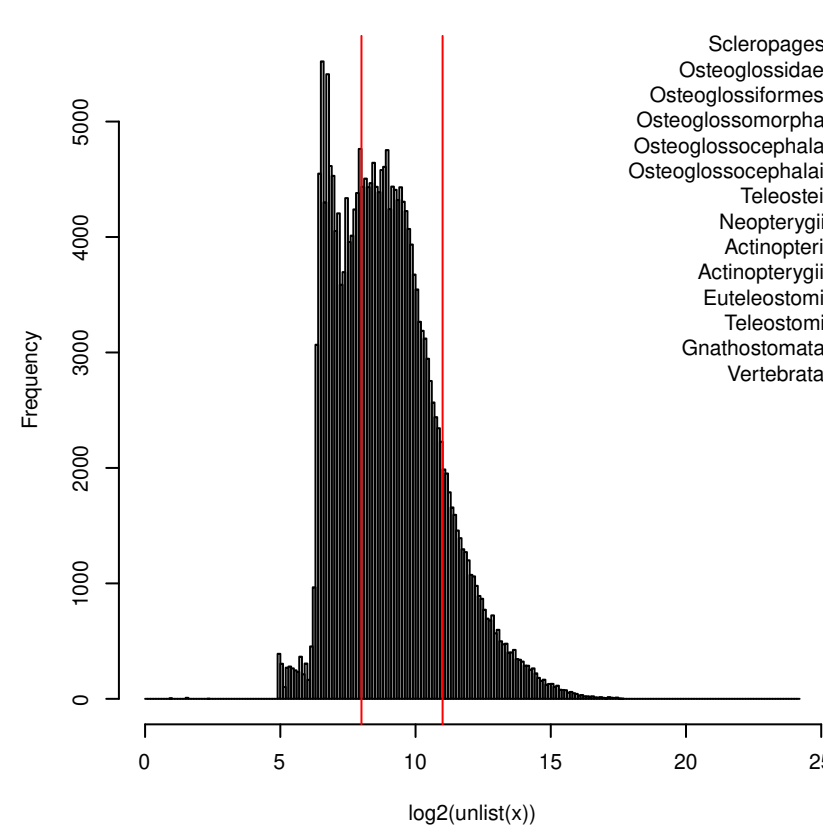

**Paramormyrops kingsleyae**

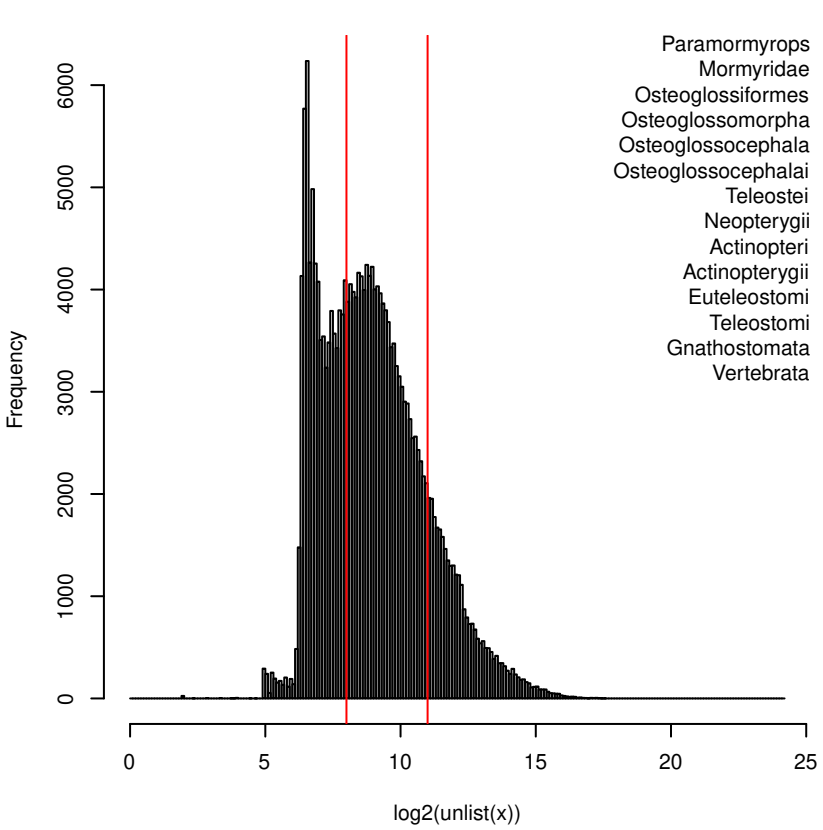

**Lepisosteus oculatus**

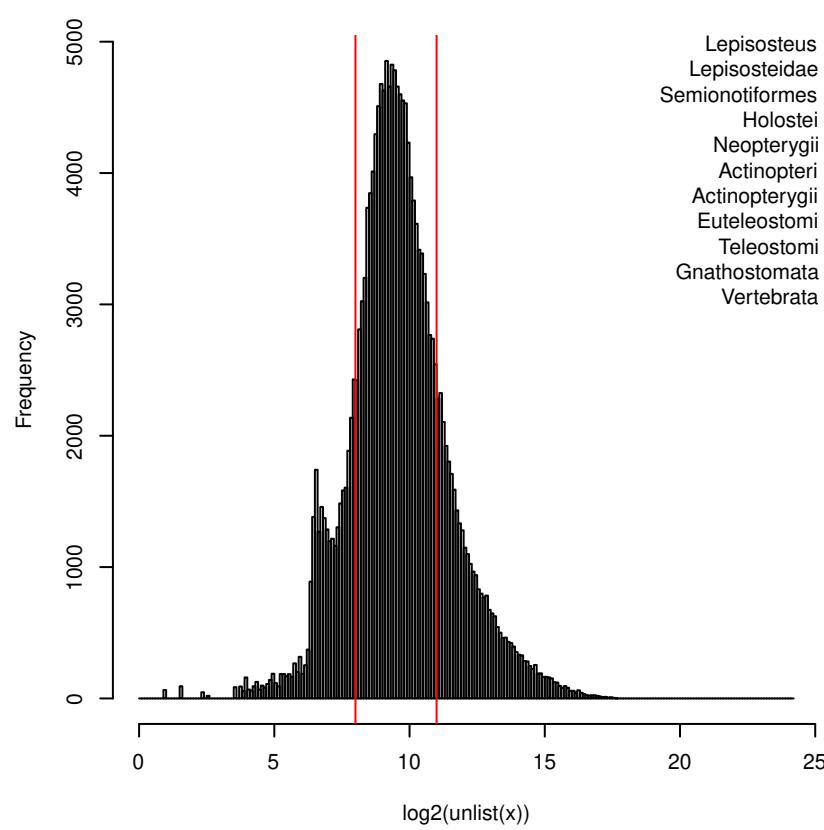

**Erpetoichthys calabaricus**

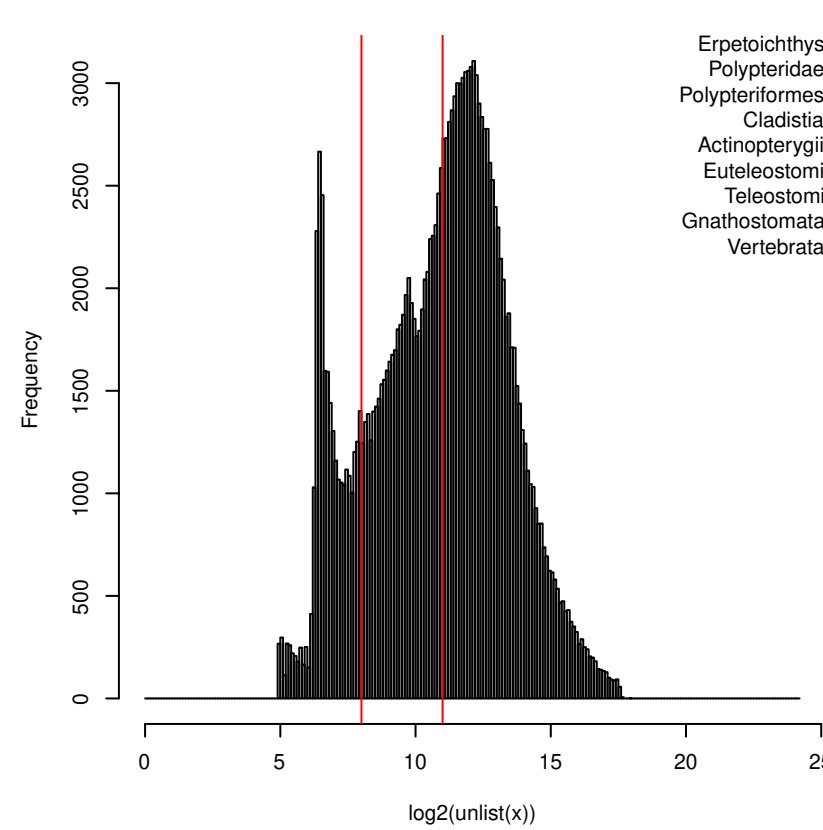

**Latimeria chalumnae**

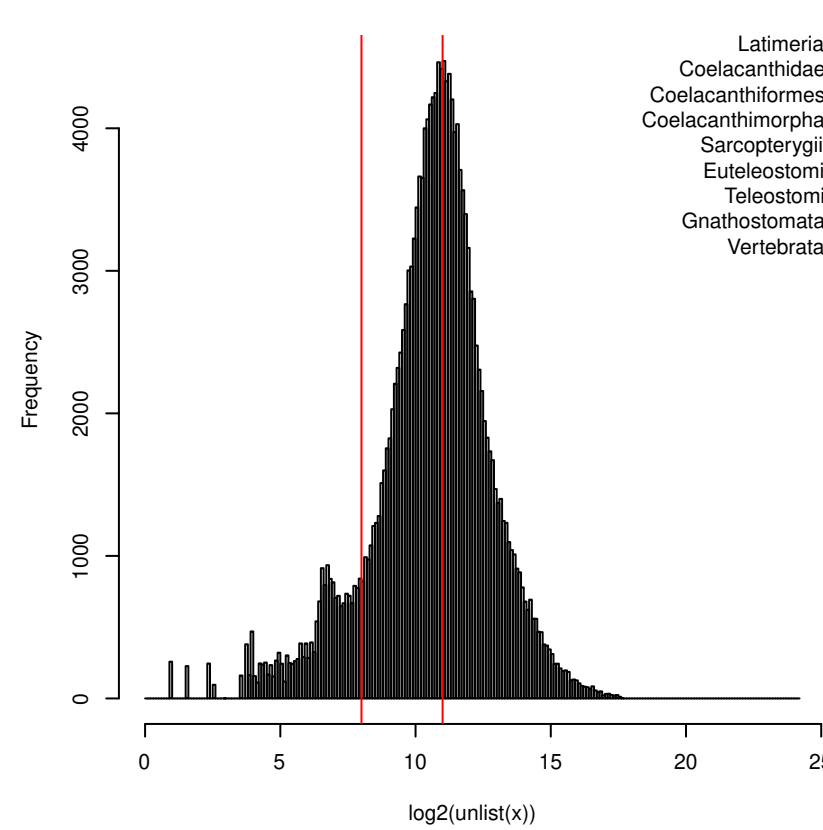

**Leptobranchium leishanense**

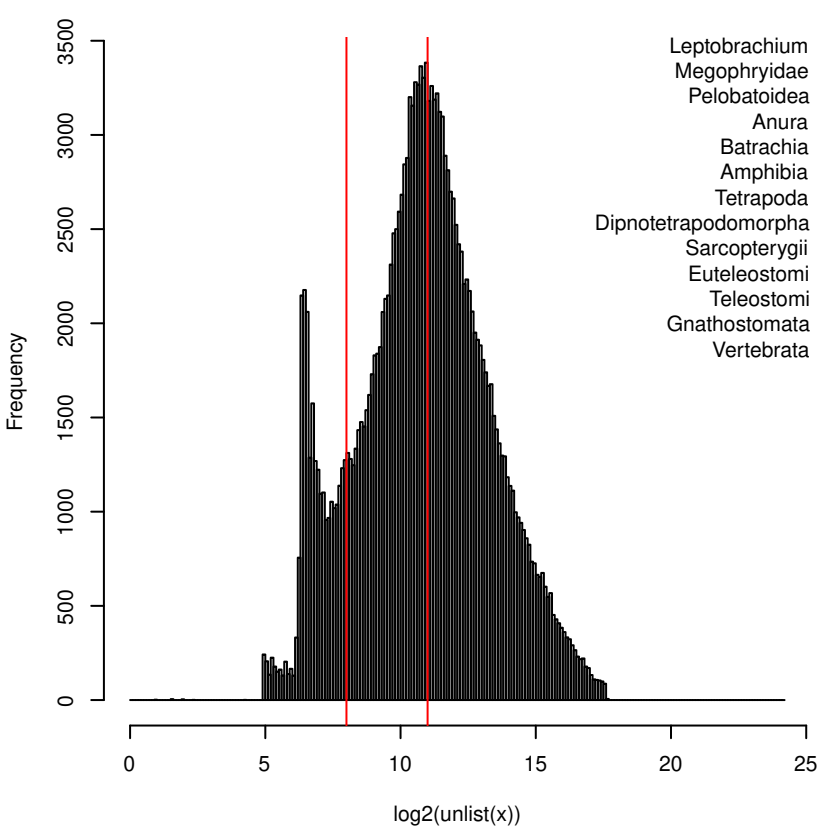

**Xenopus tropicalis**

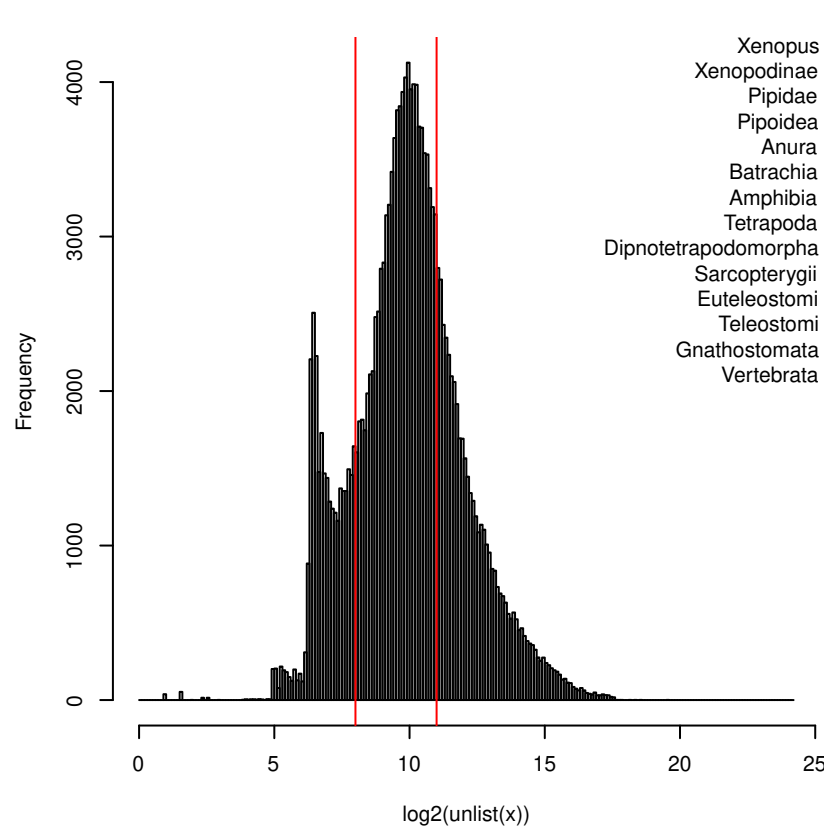

**Sphenodon punctatus**

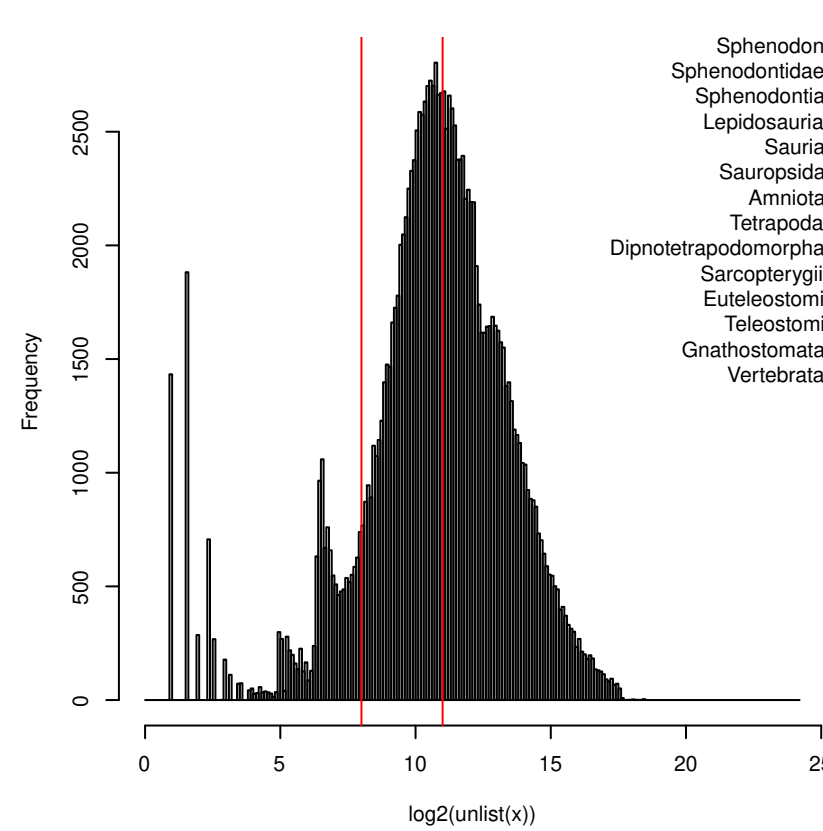

**Pogona vitticeps**

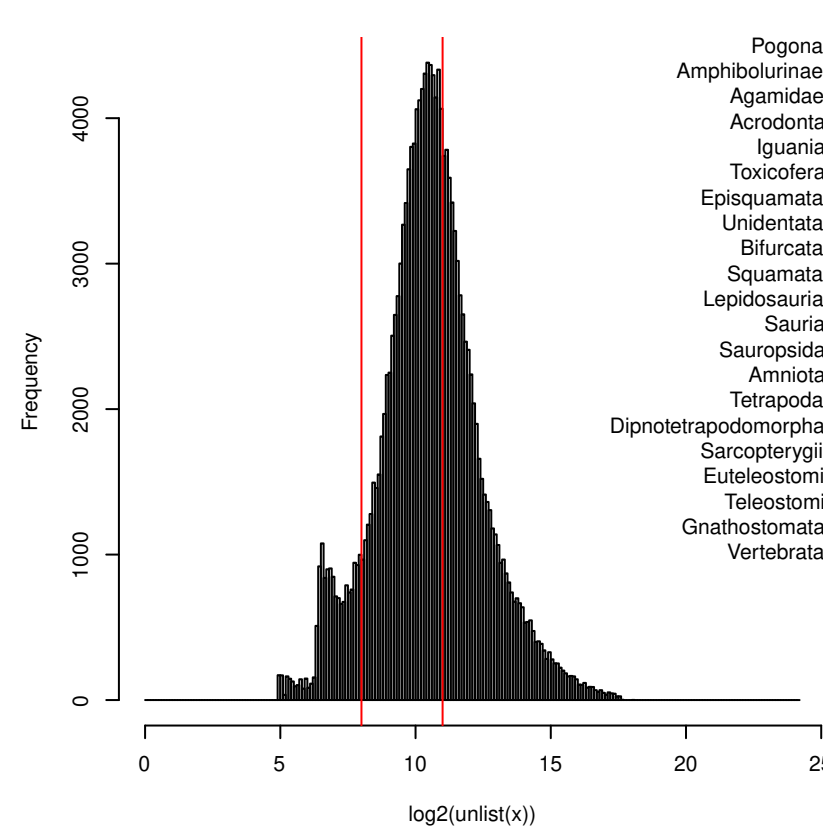

**Anolis carolinensis**

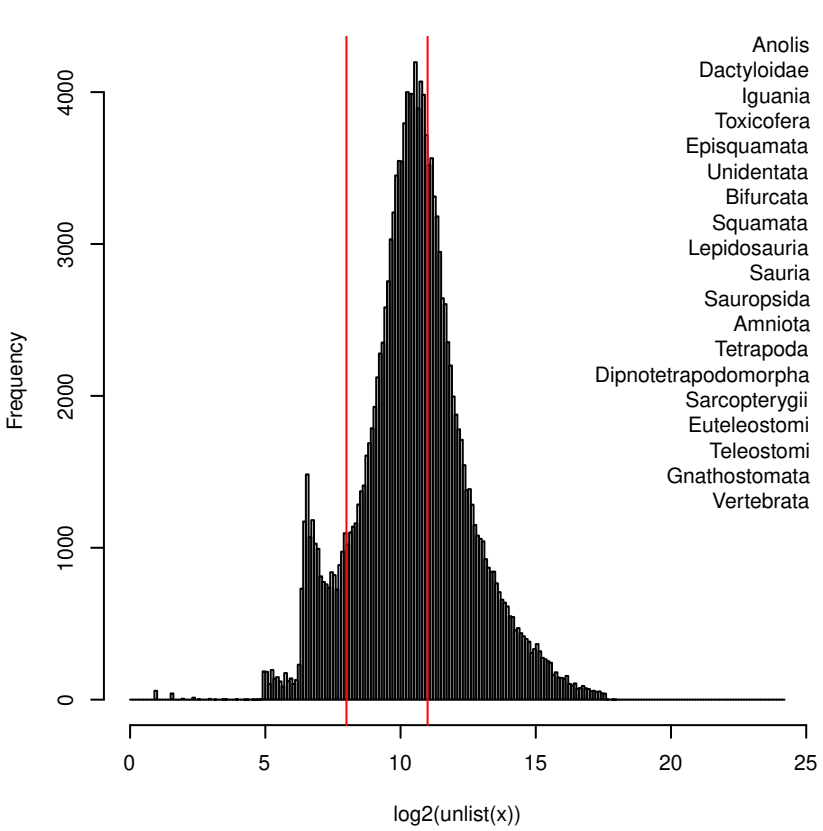

**Varanus komodoensis**

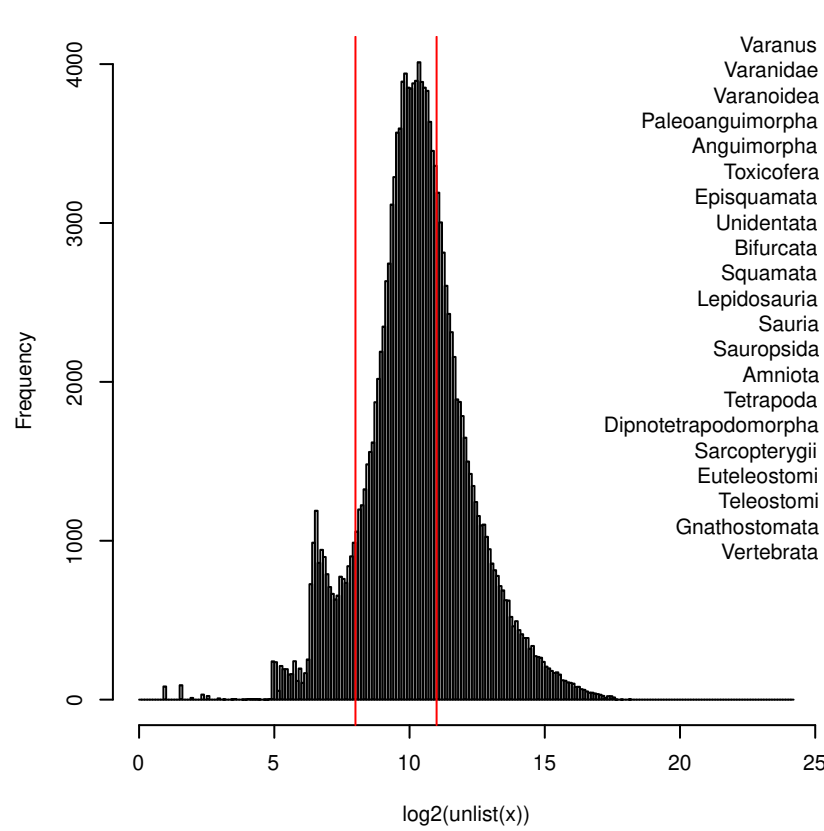

**Notechis scutatus**

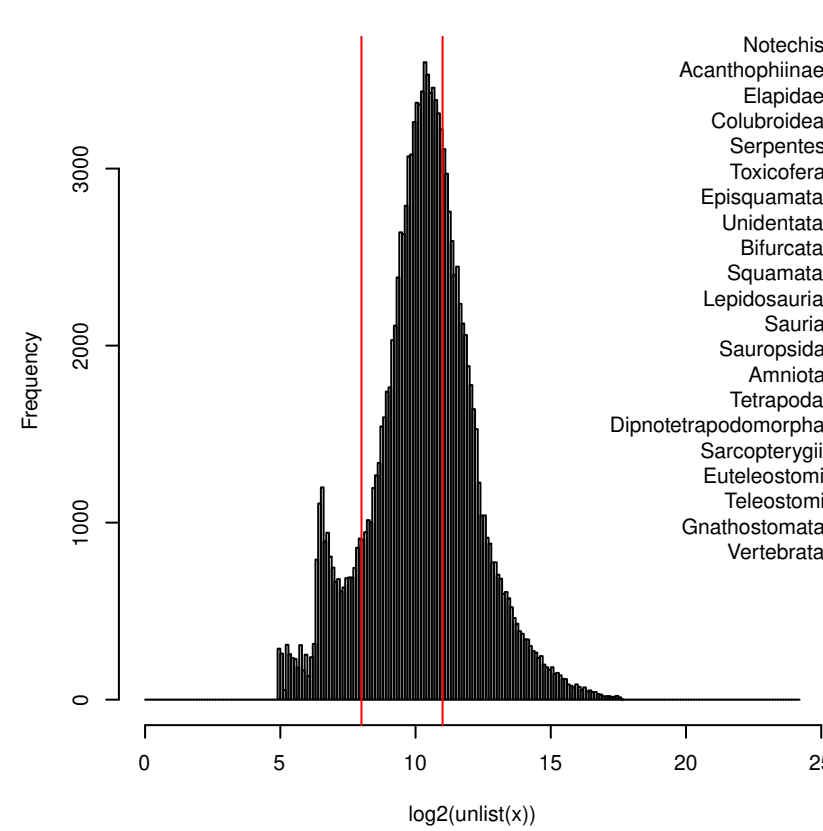

**Pseudonaja textilis**

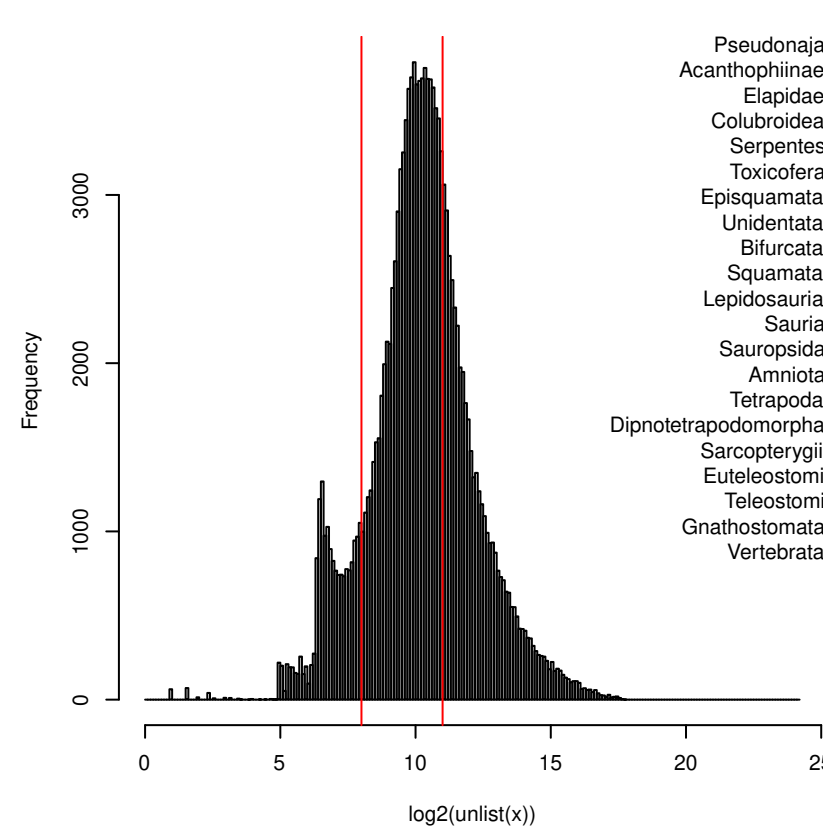

**Naja naja**

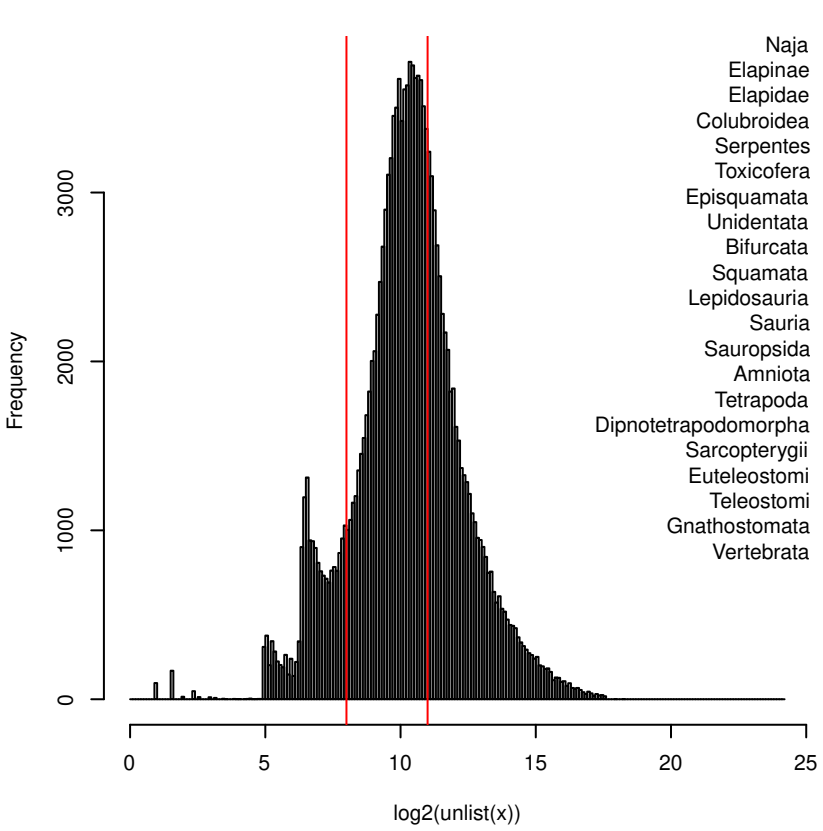

**Laticauda laticaudata**

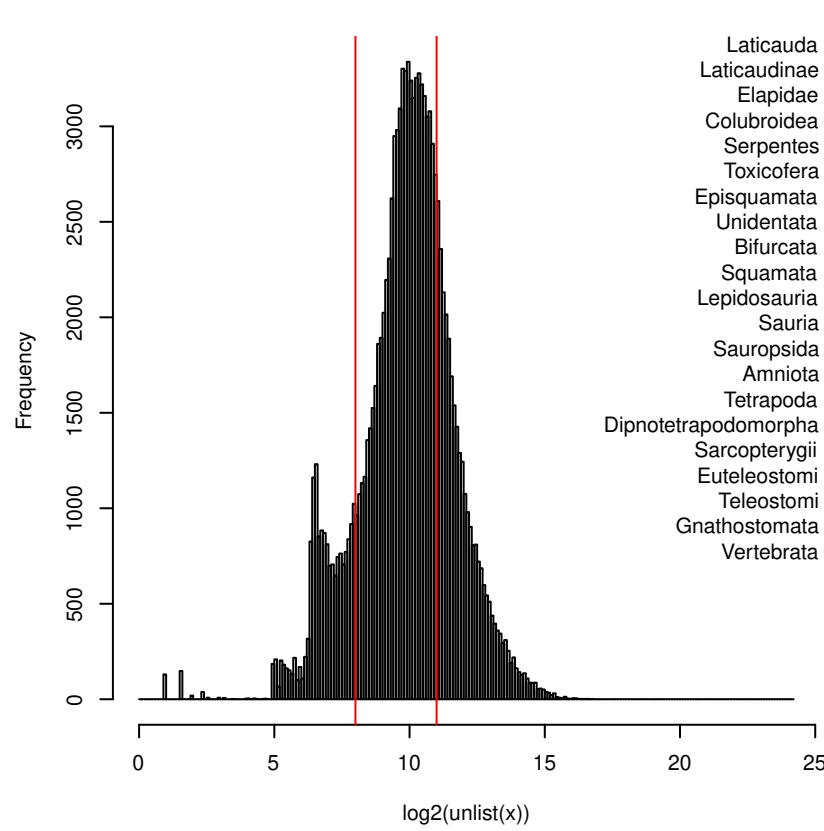

**Salvator merianae**

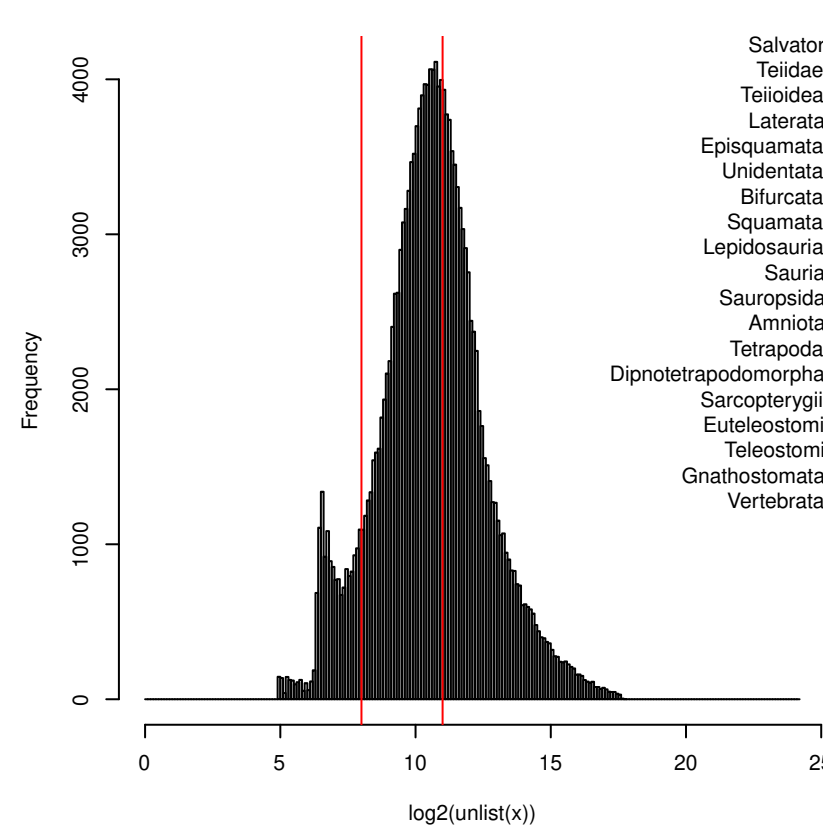

**Podarcis muralis**

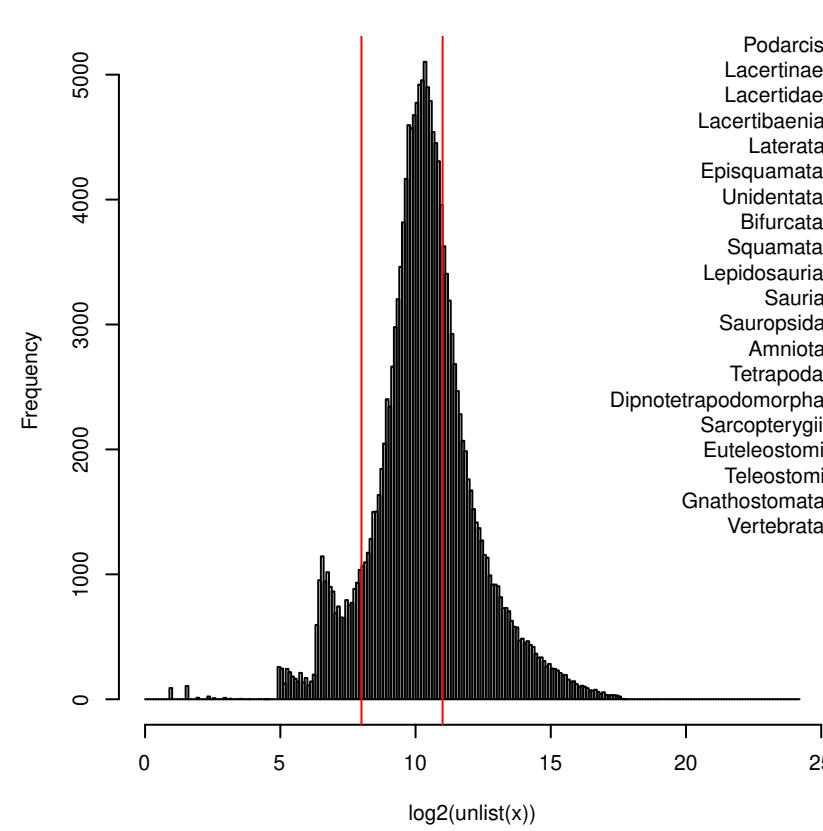

**Dromaius novaehollandiae**

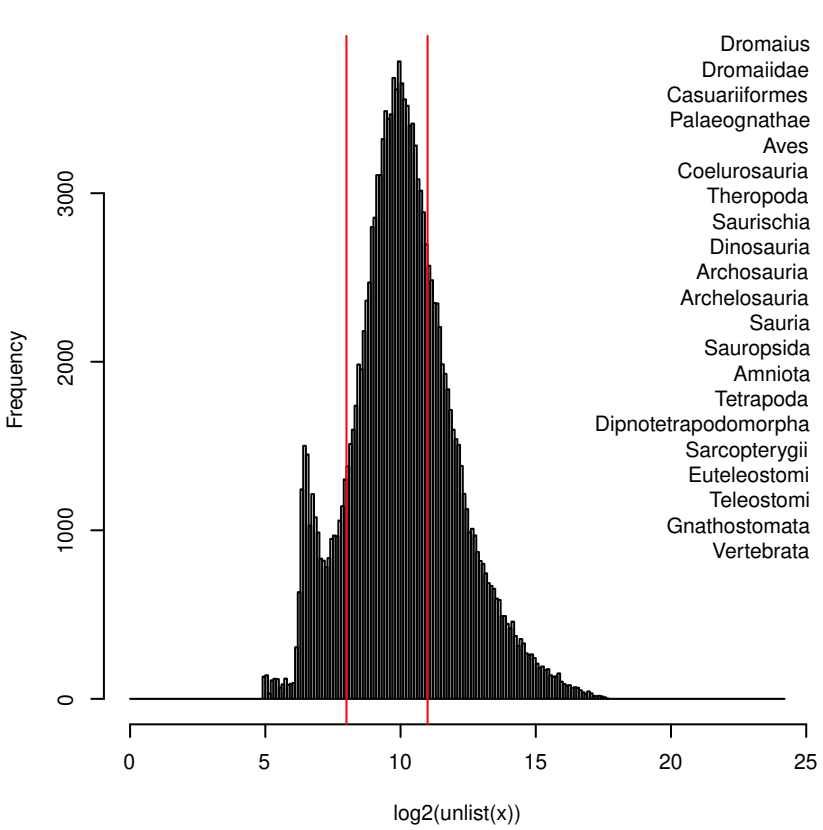

**Struthio camelus\_australis**

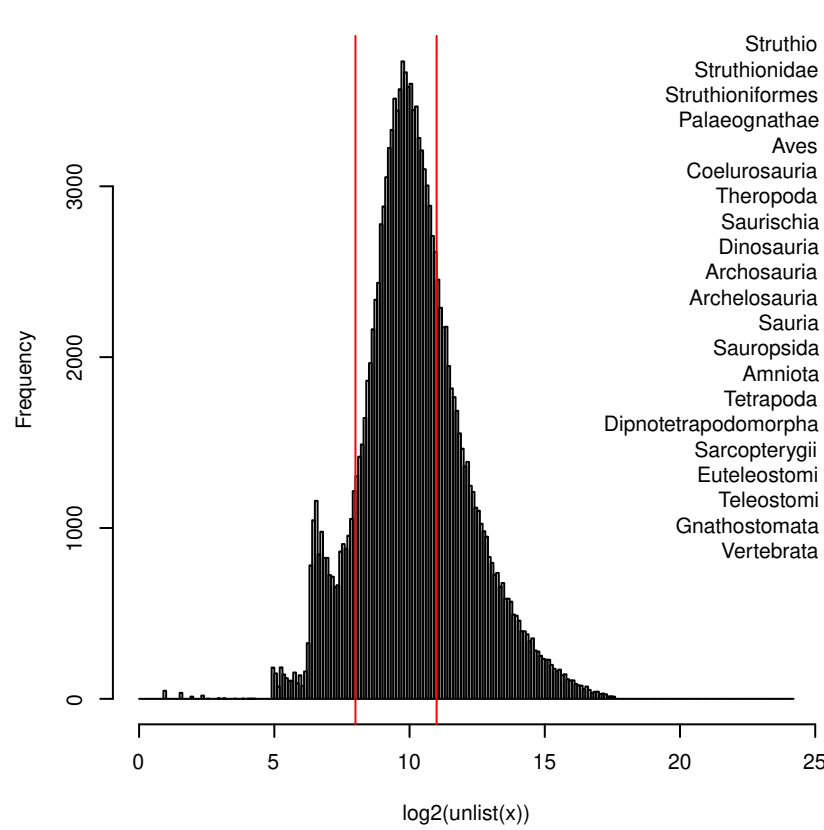

**Nothoprocta perdicaria**

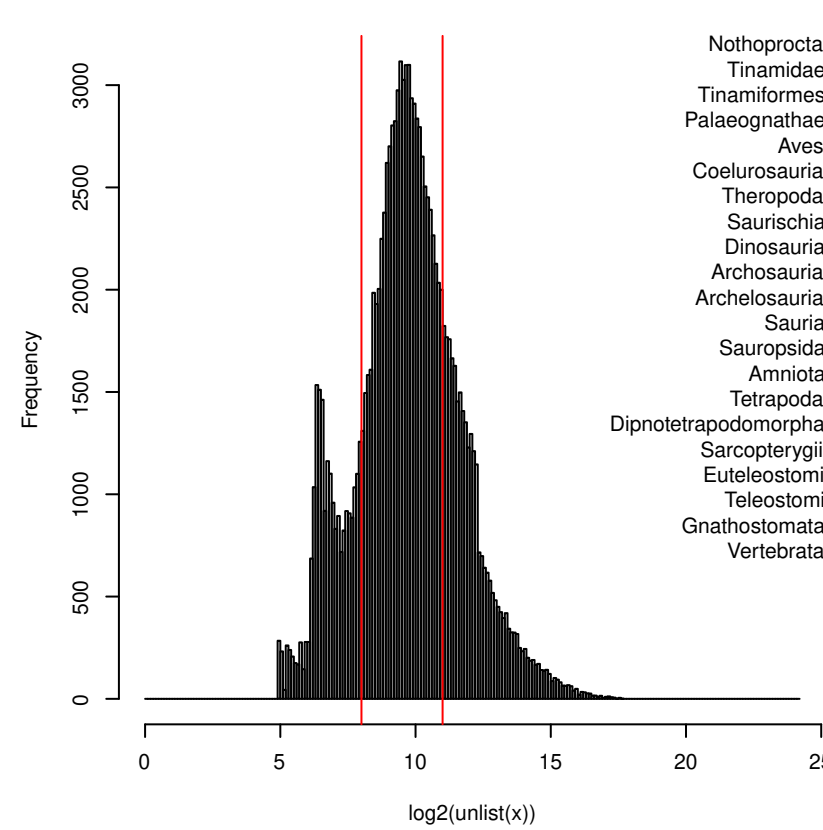

**Apteryx haastii**

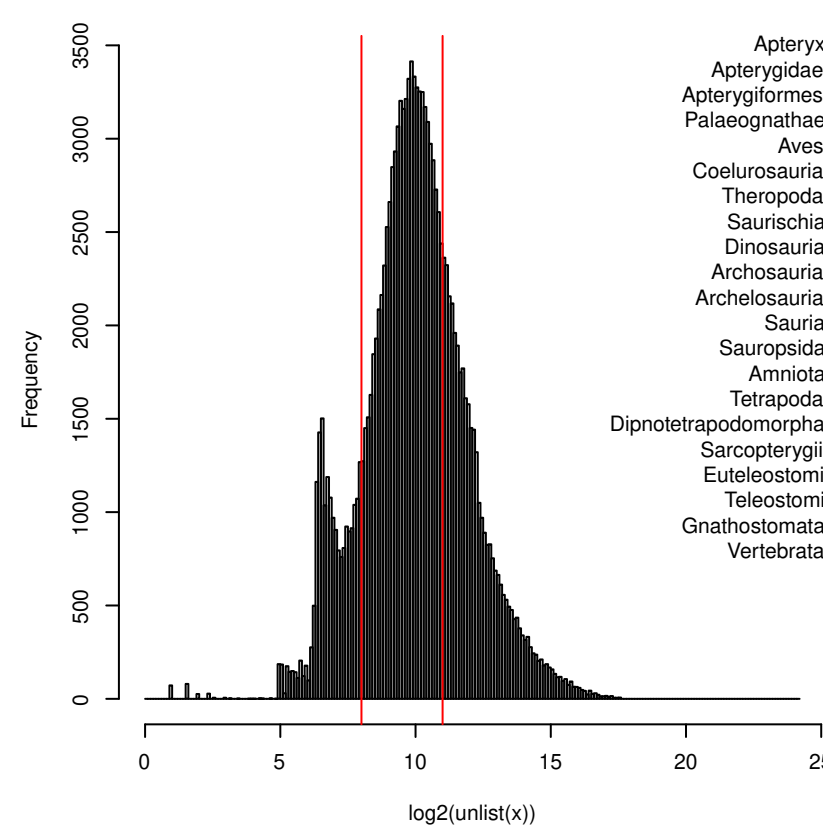

**Apteryx owenii**

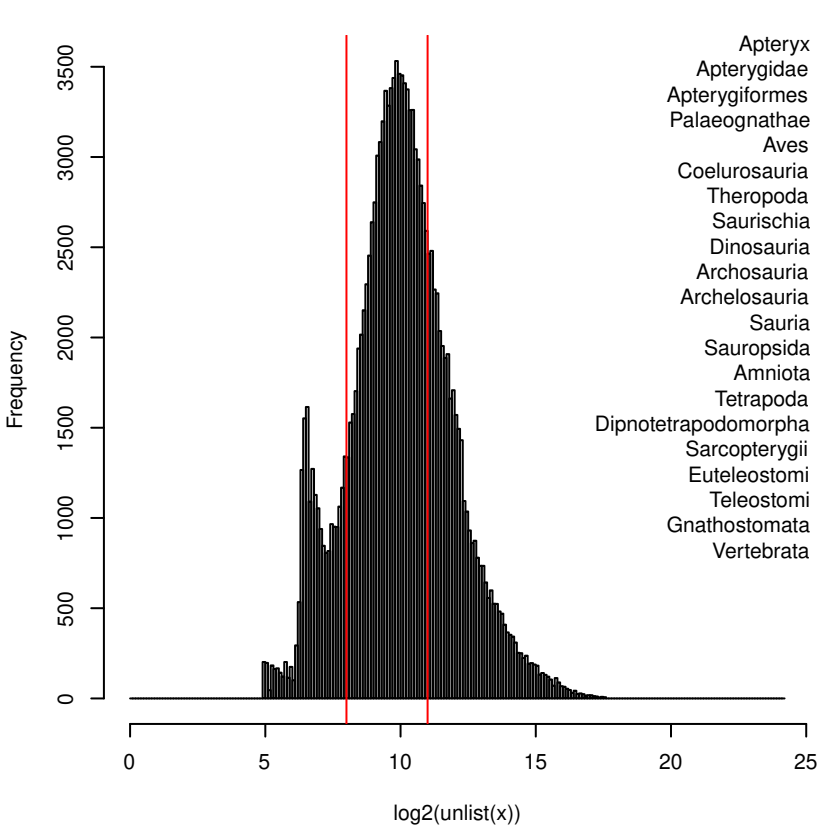

**Apteryx rowi**

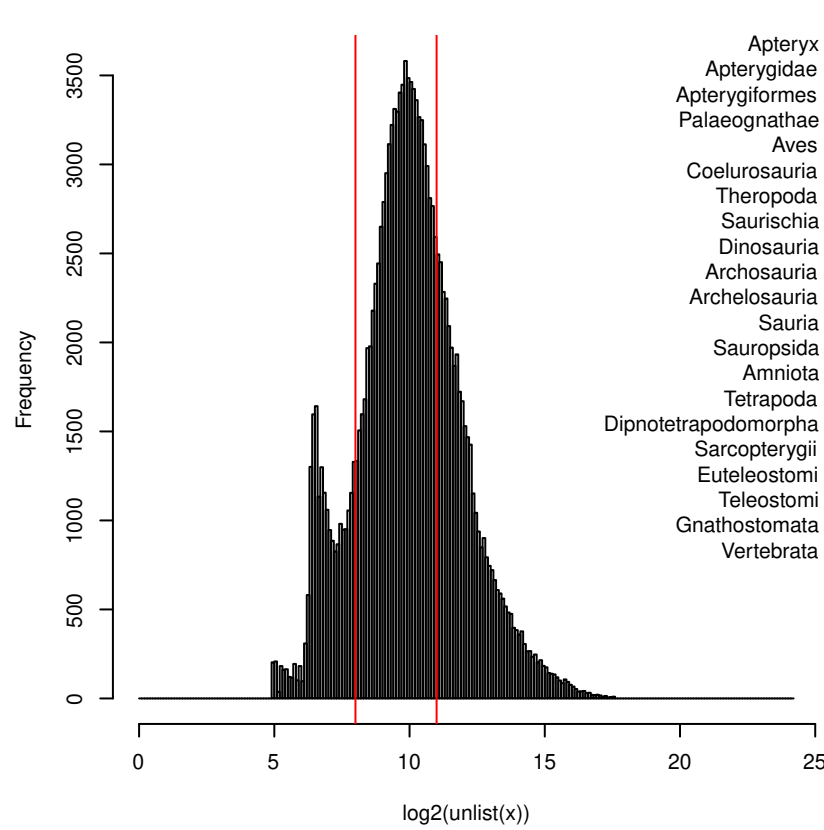

**Calidris pugnax**

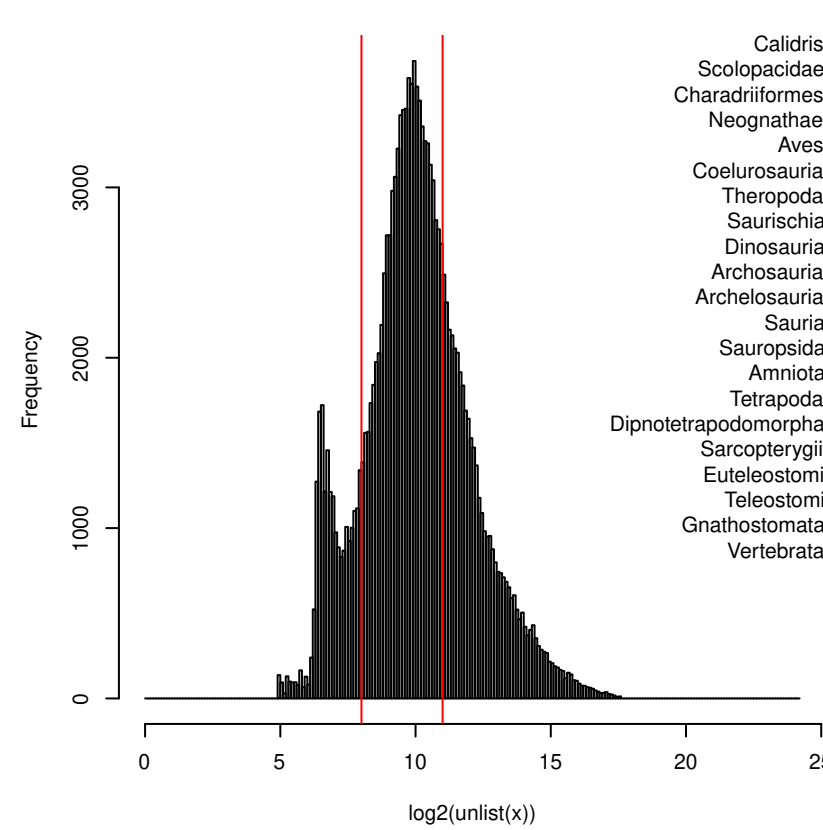

**Calidris pygmaea**

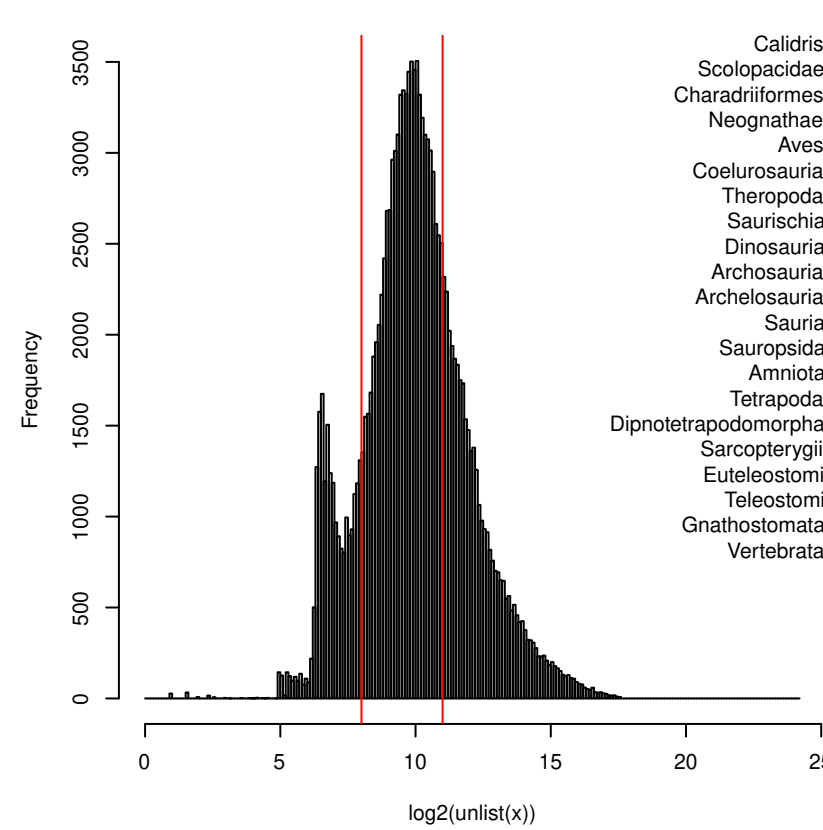

**Falco tinnunculus**

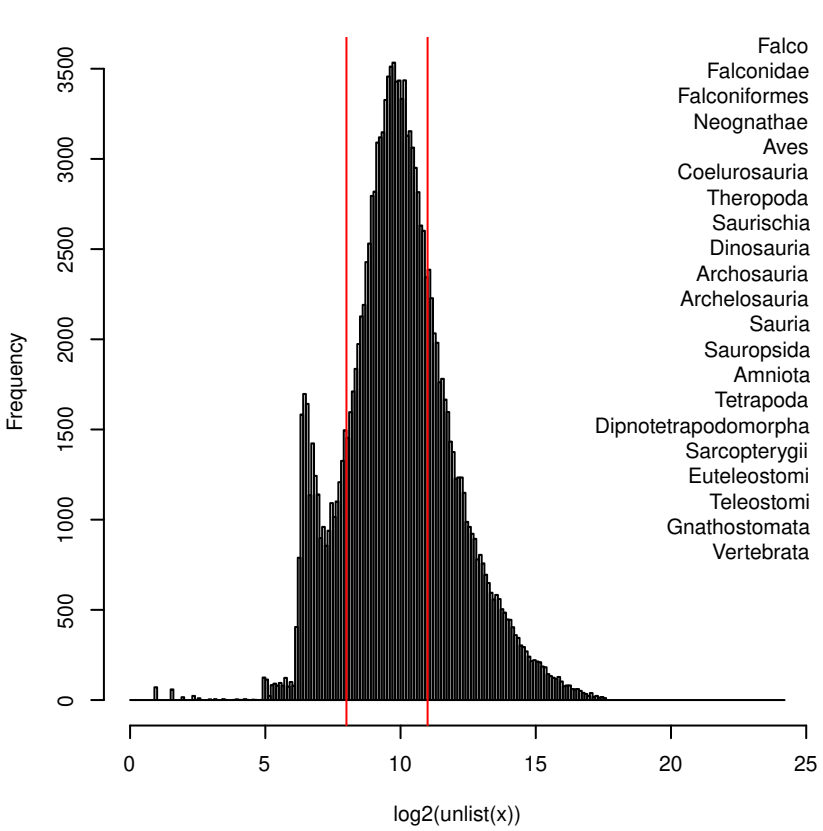

**Parus major**

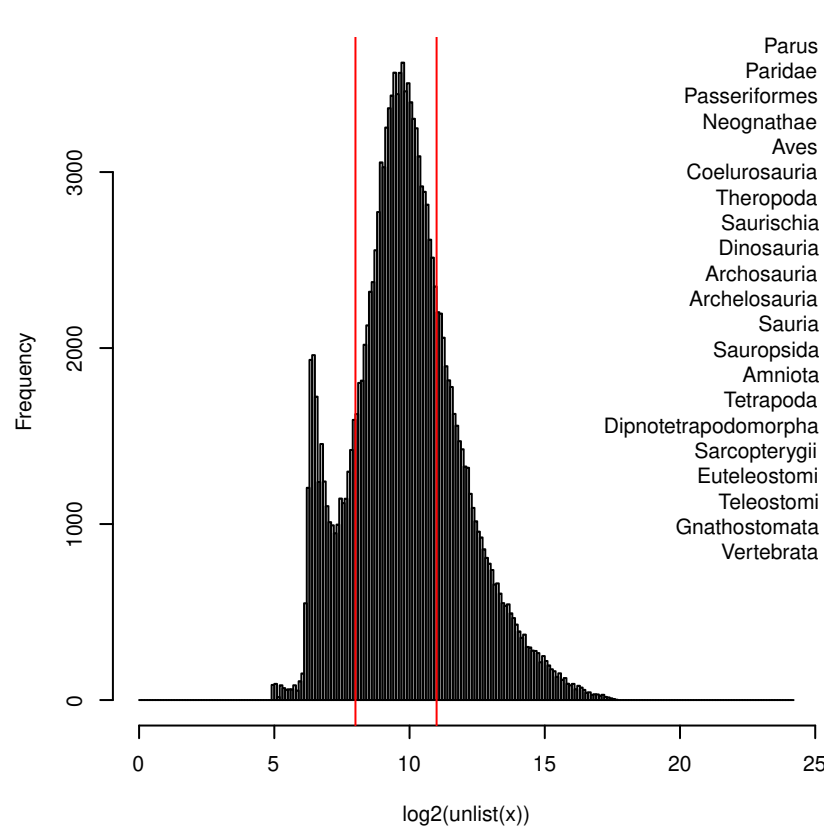

**Cyanistes caeruleus**

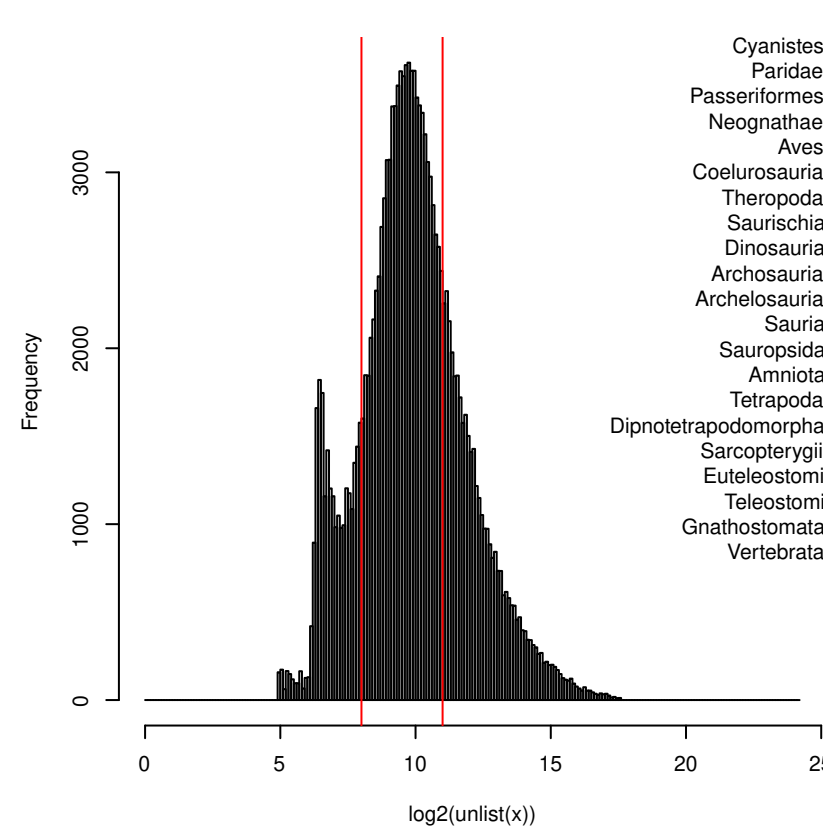

**Catharus ustulatus**

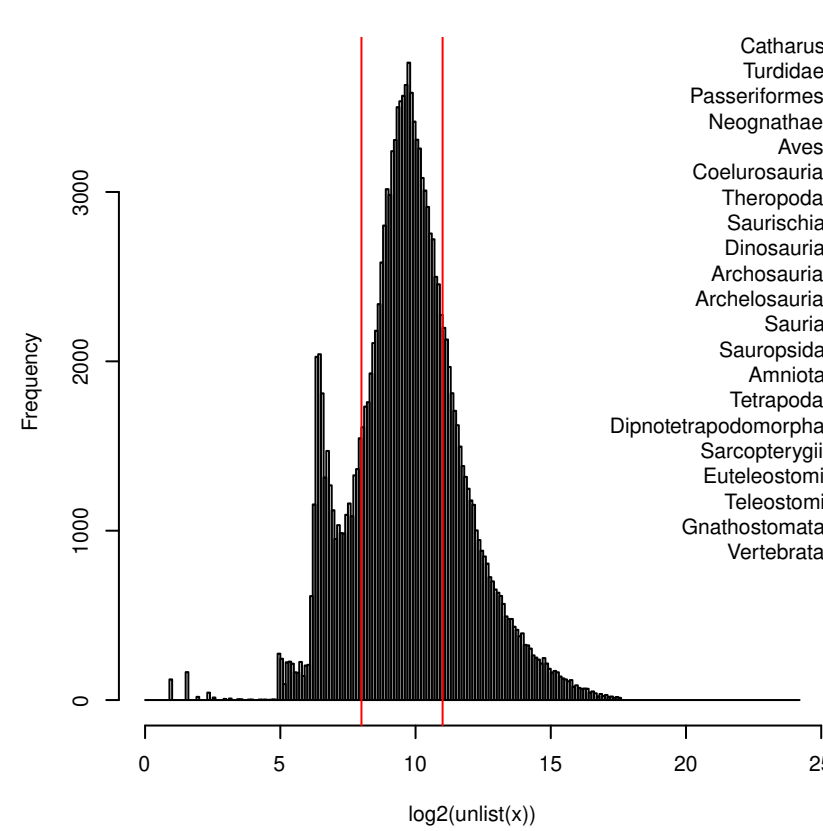

**Ficedula albicollis**

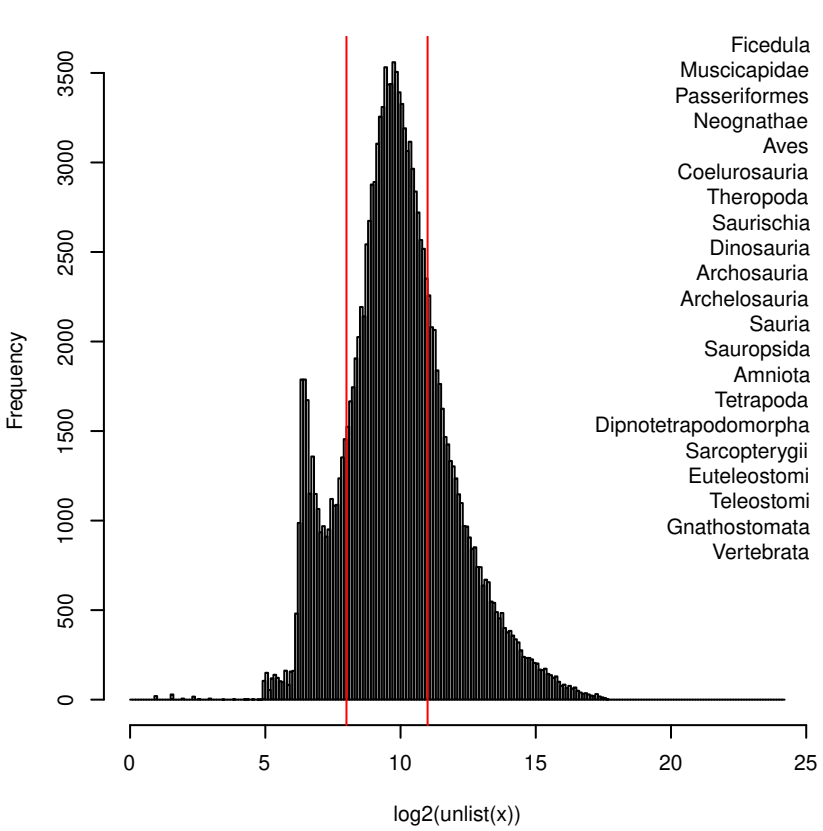

**Manacus vitellinus**

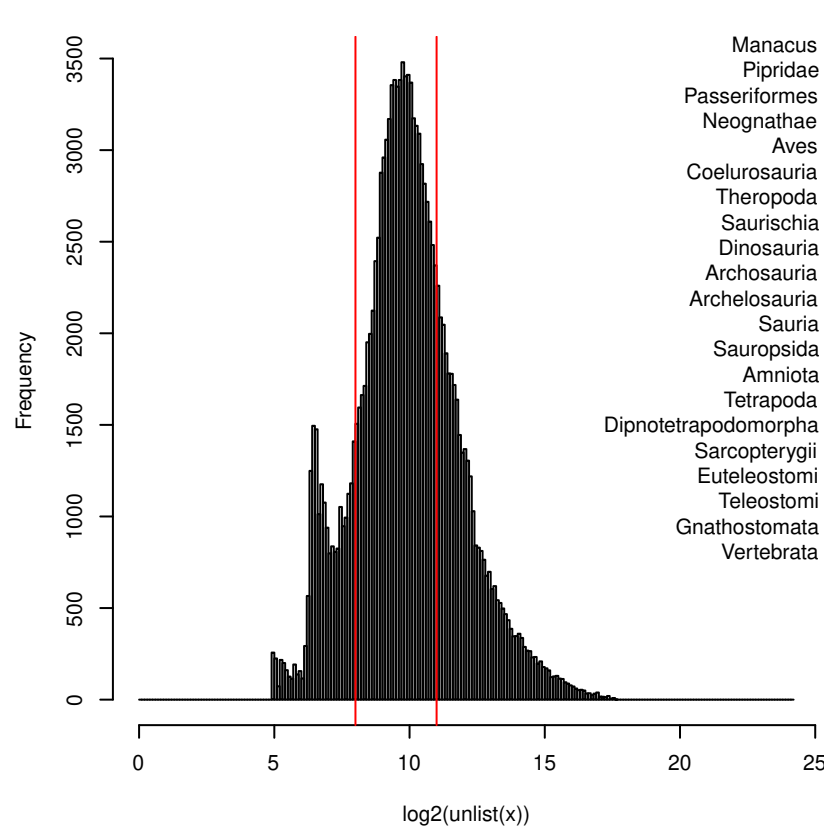

**Lepidothrix coronata**

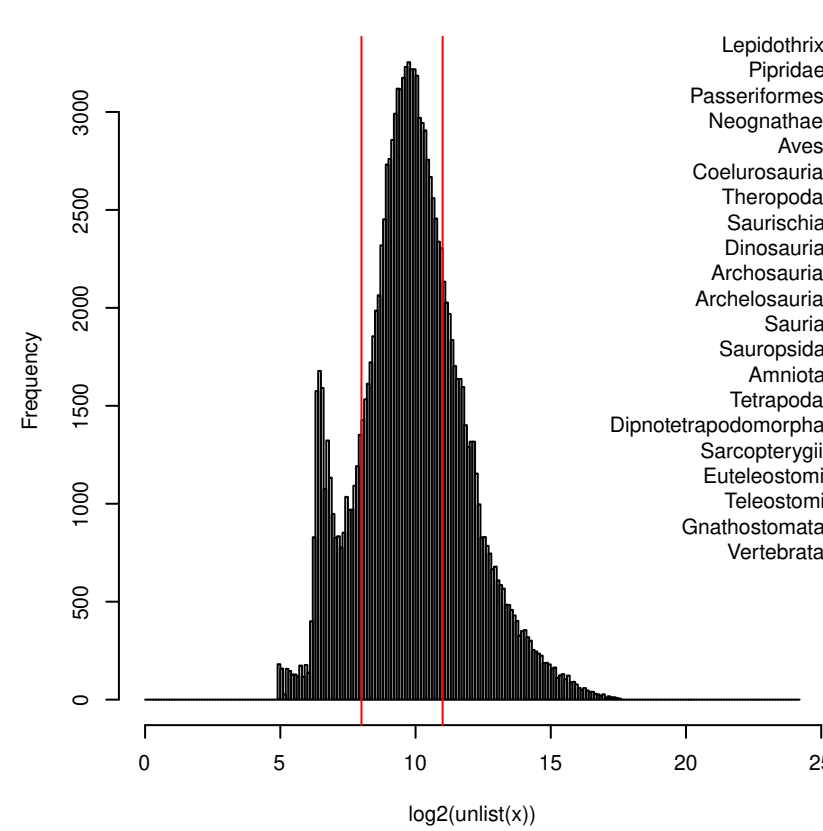

**Serinus canaria**

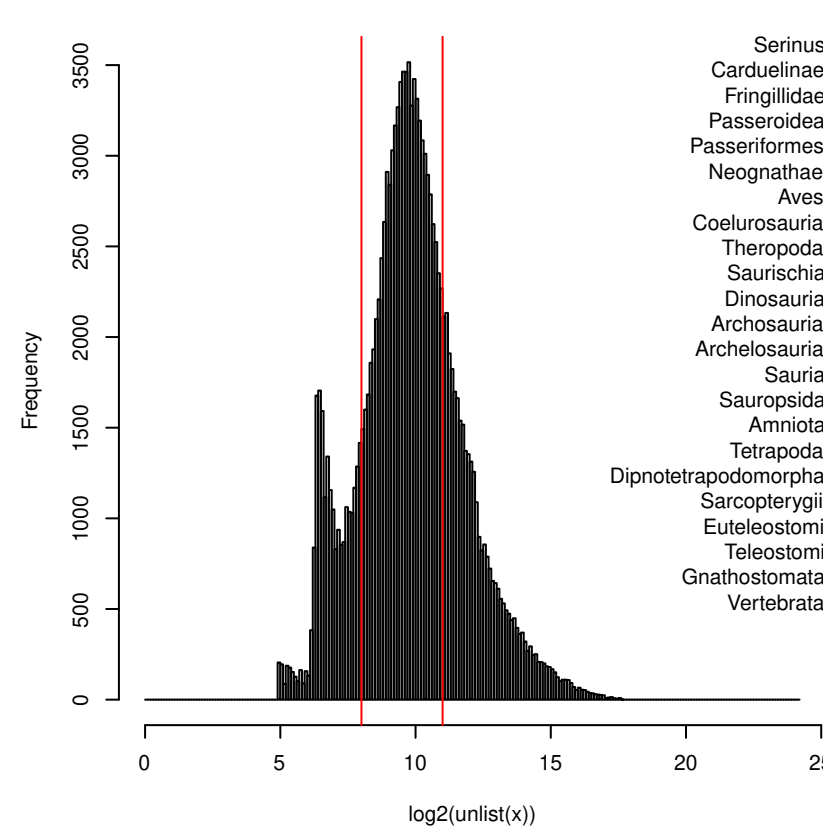

**Lonchura striata\_domestica**

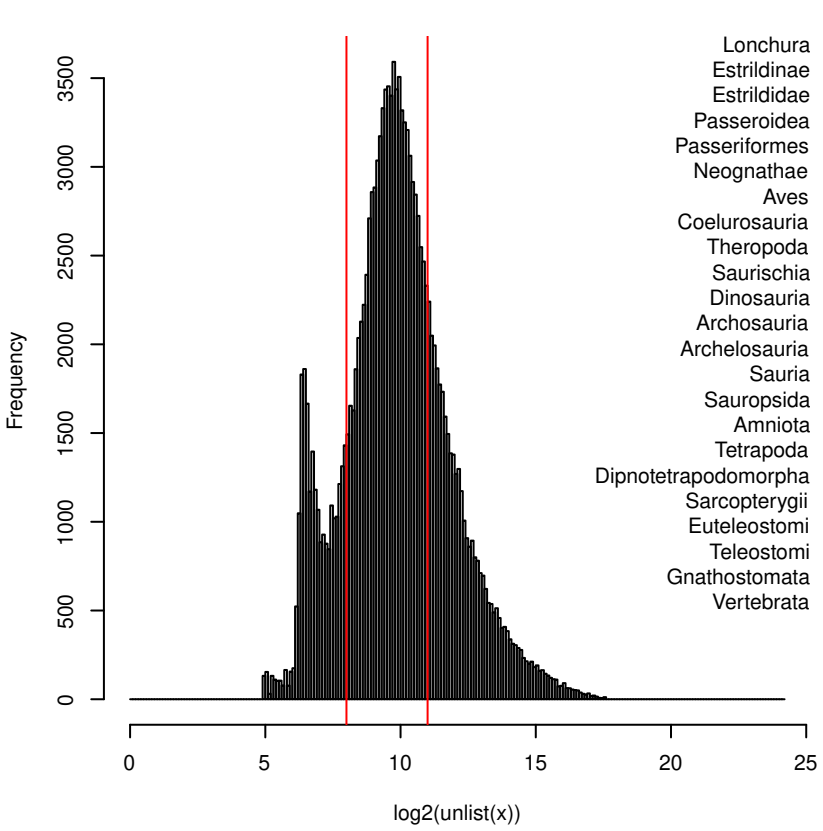

**Taeniopygia guttata**

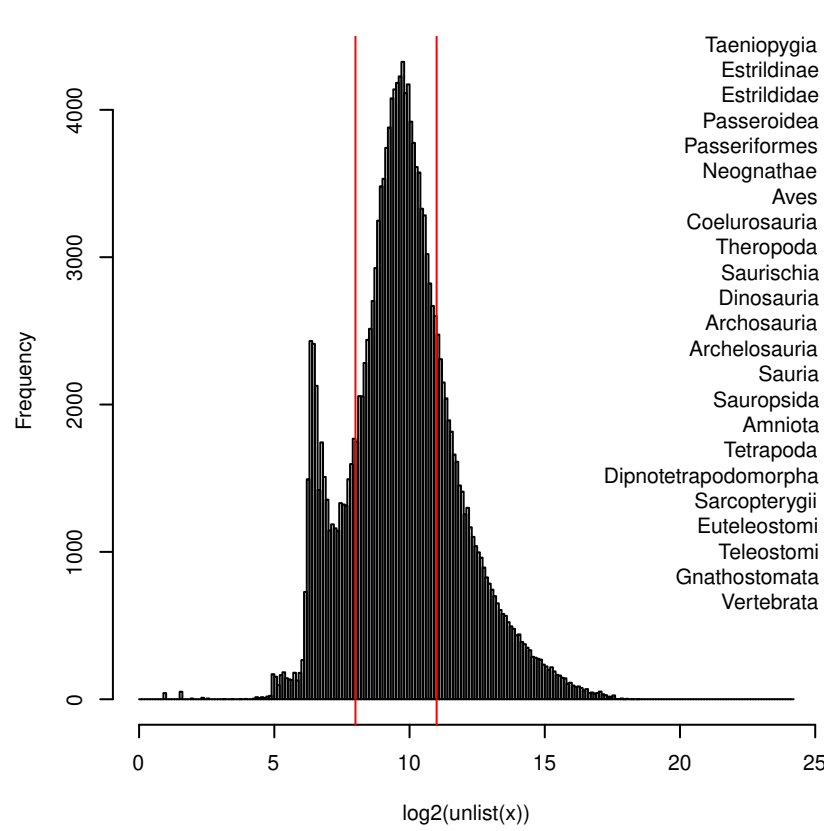

**Erythrura gouldiae**

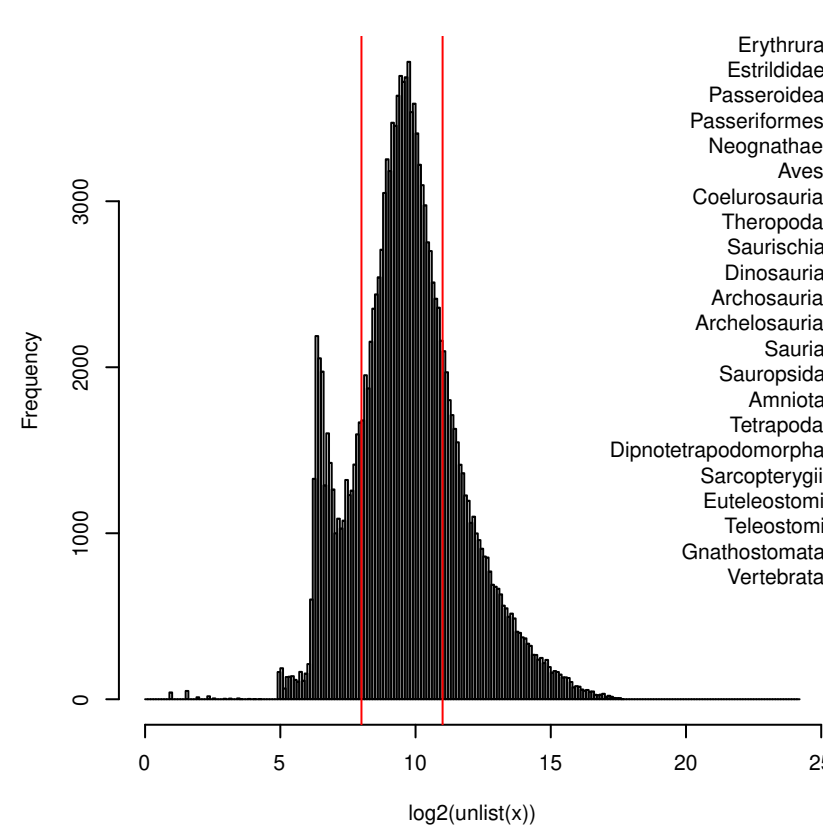

**Corvus moneduloides**

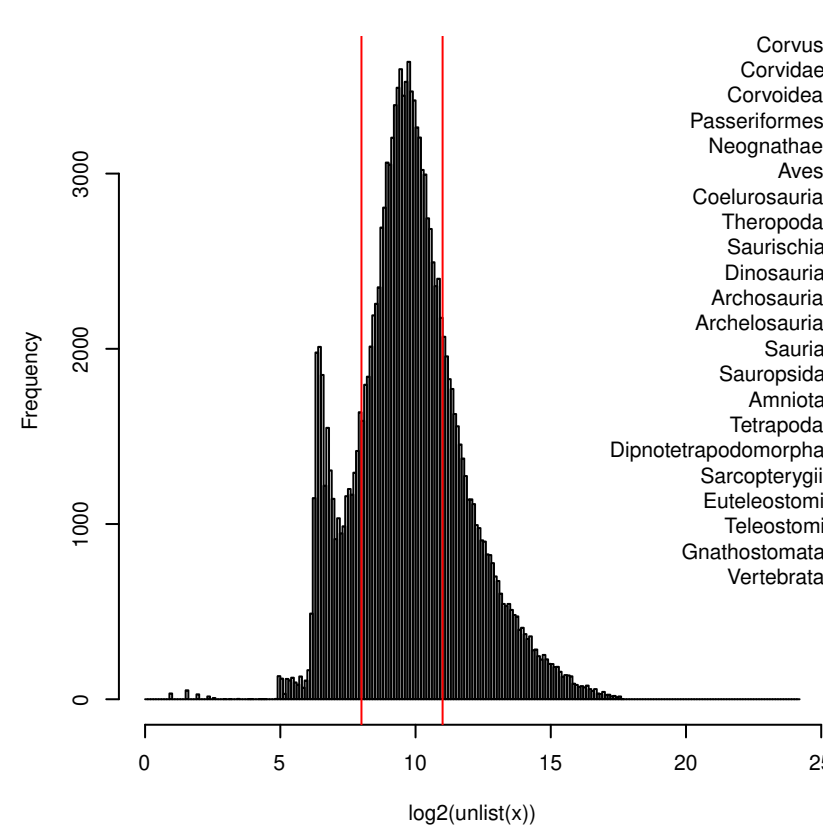



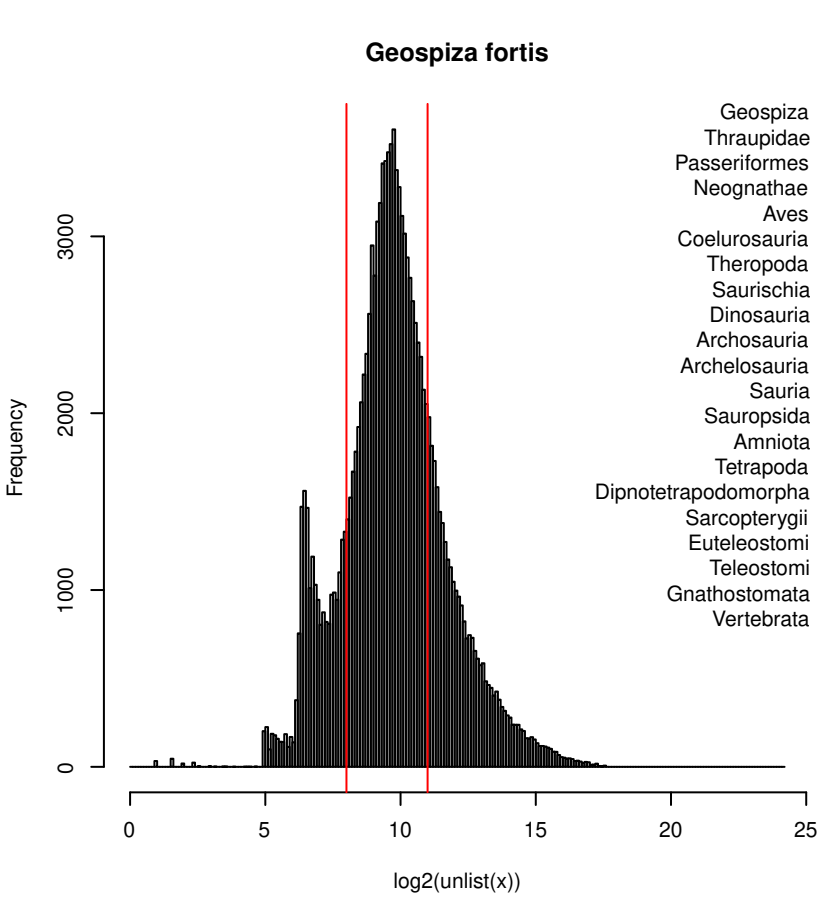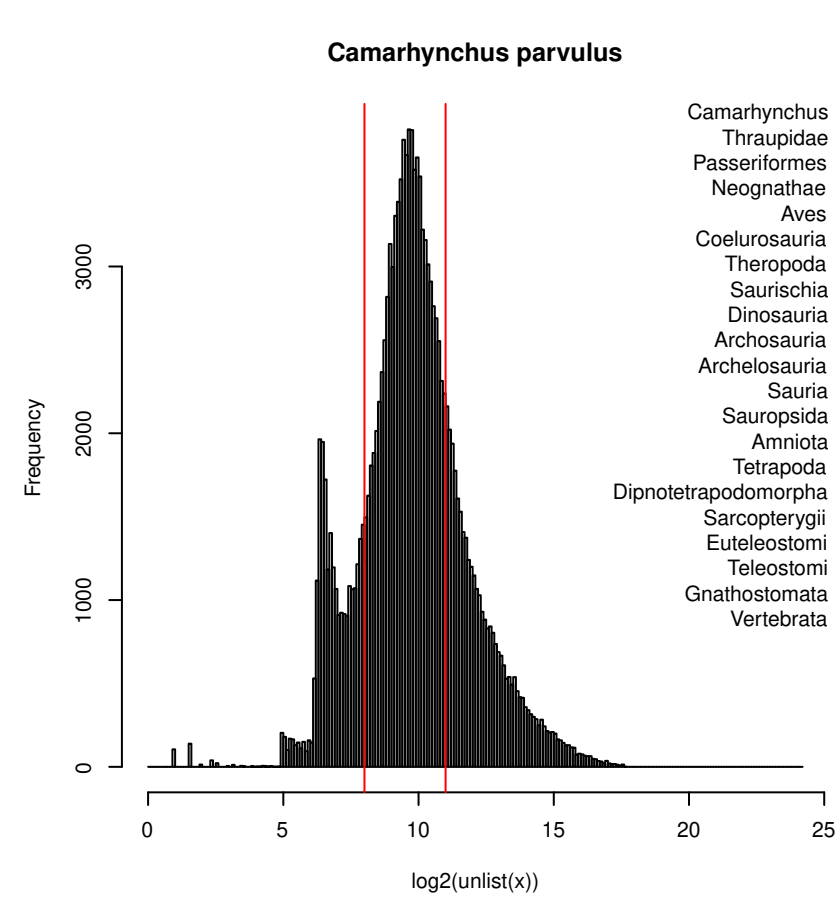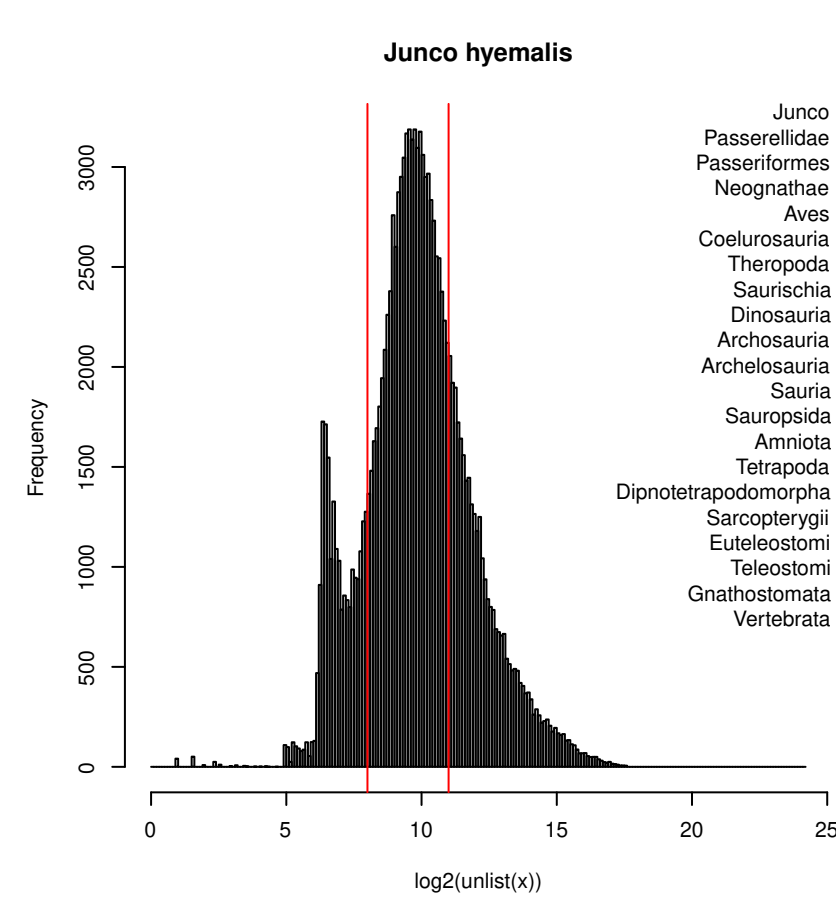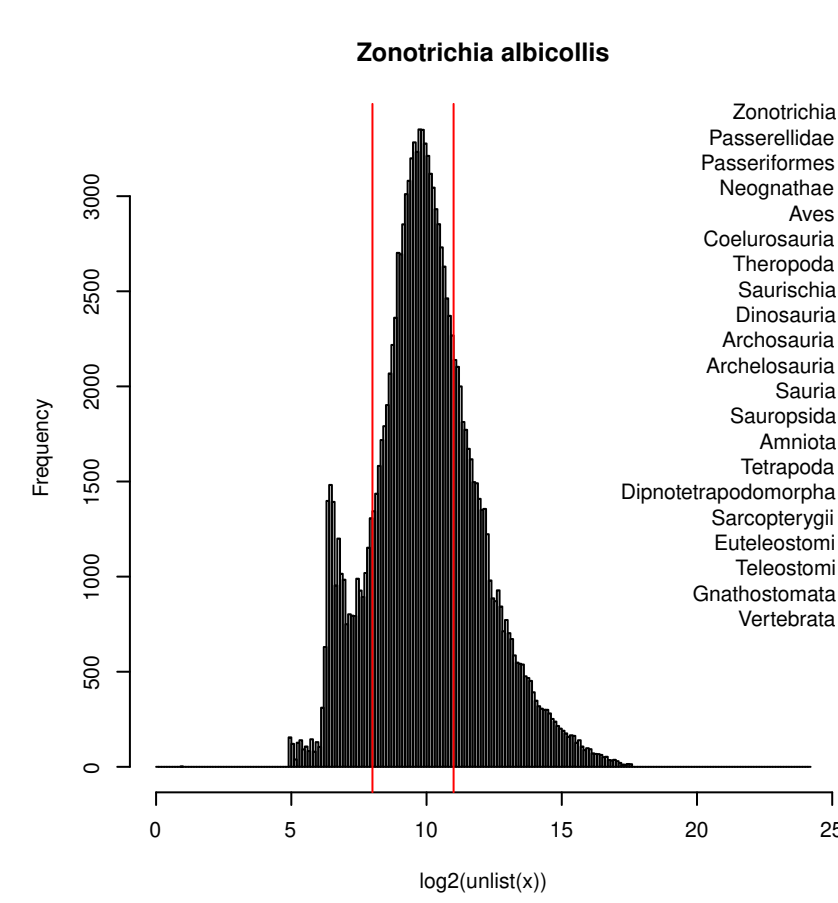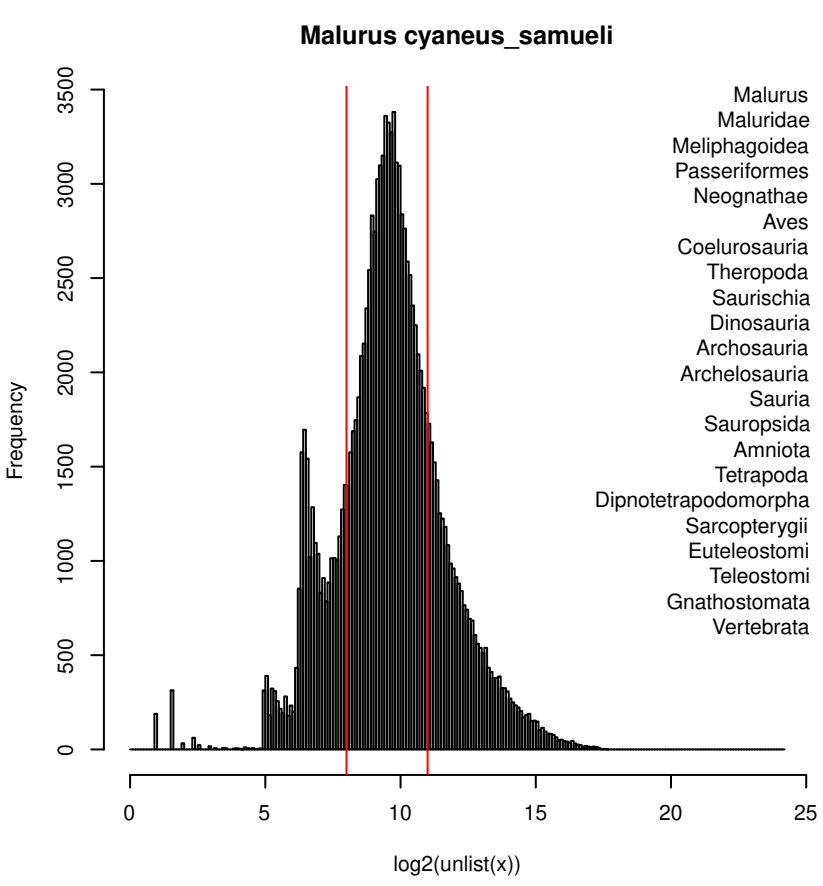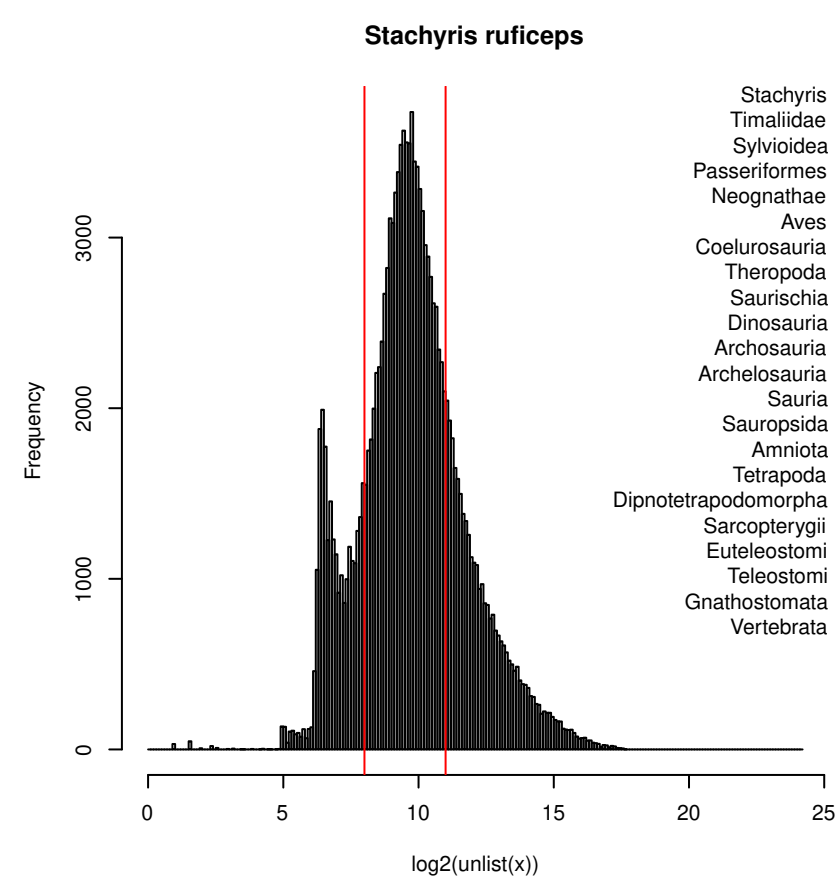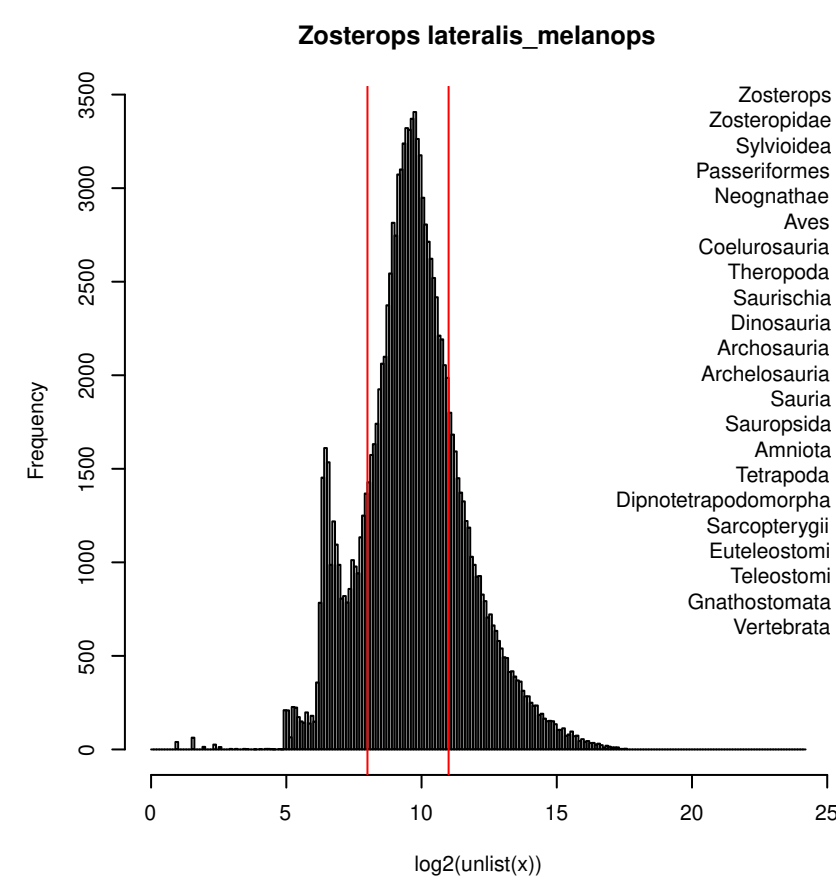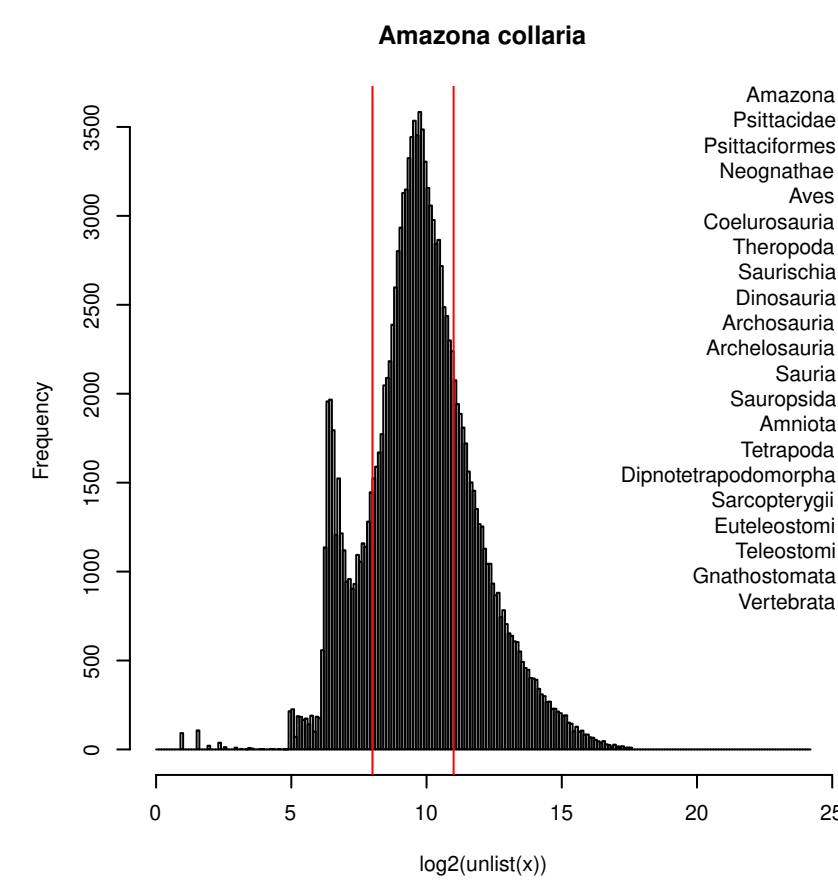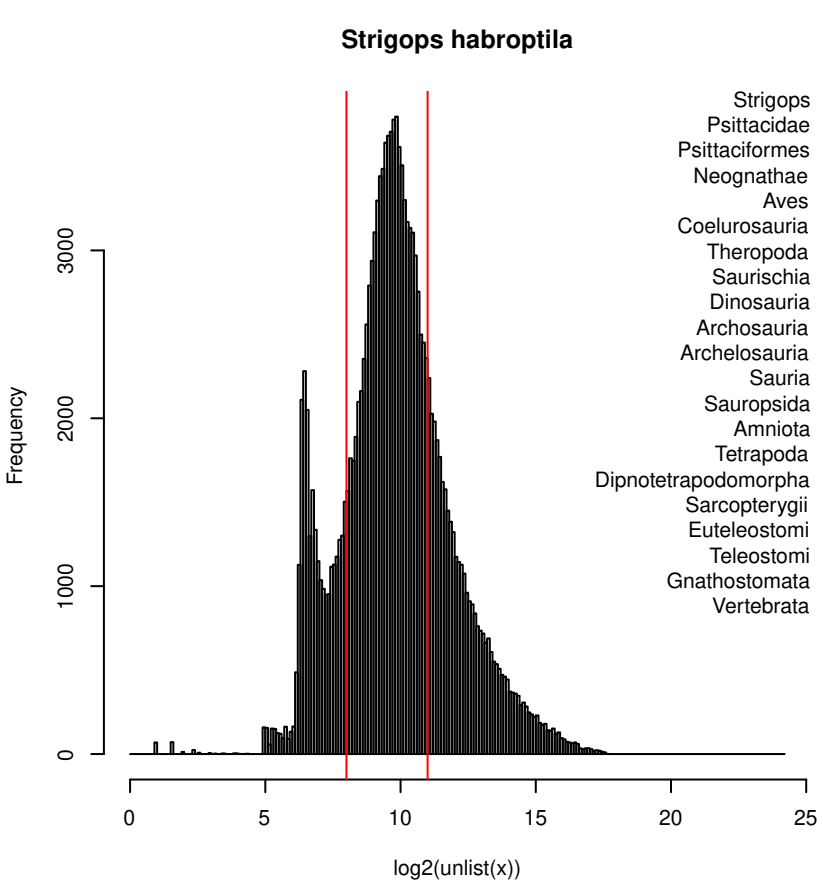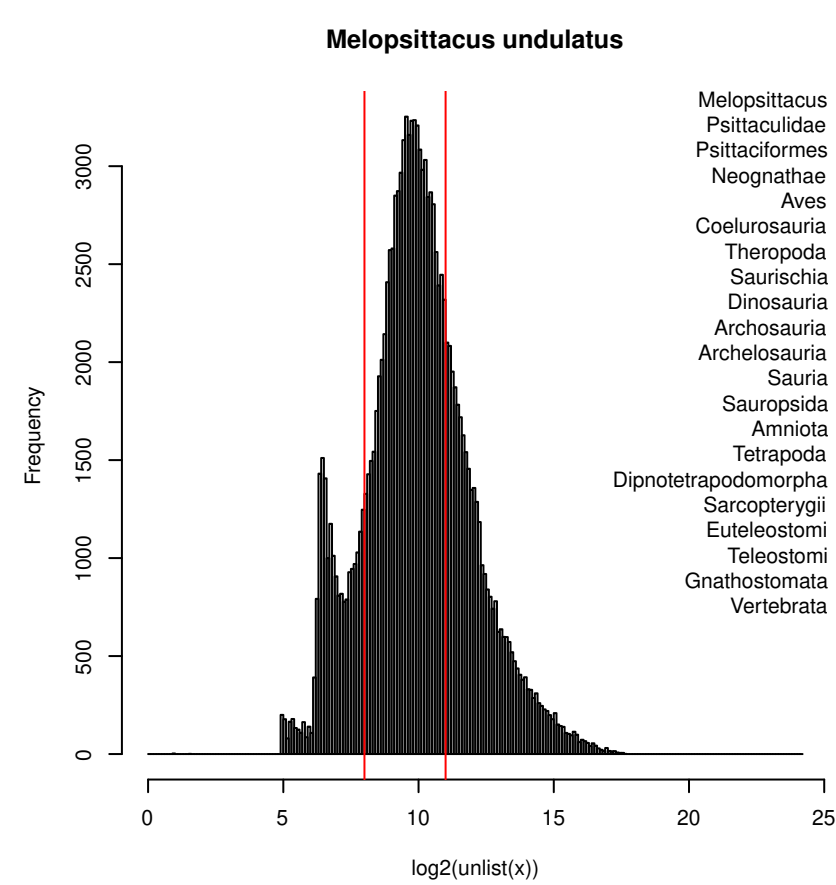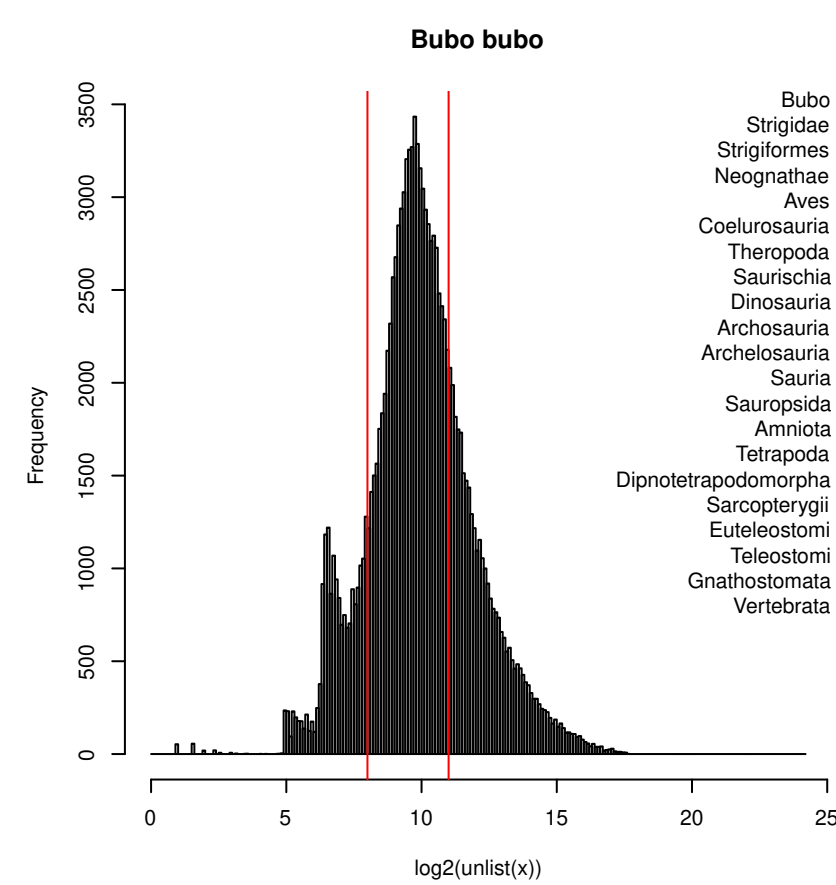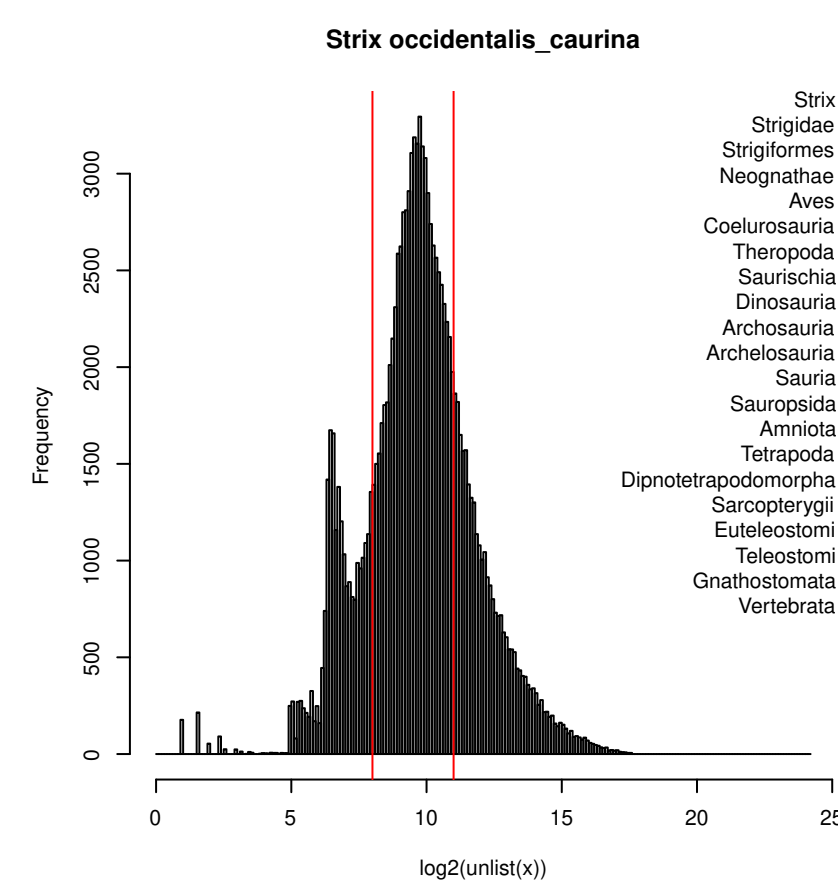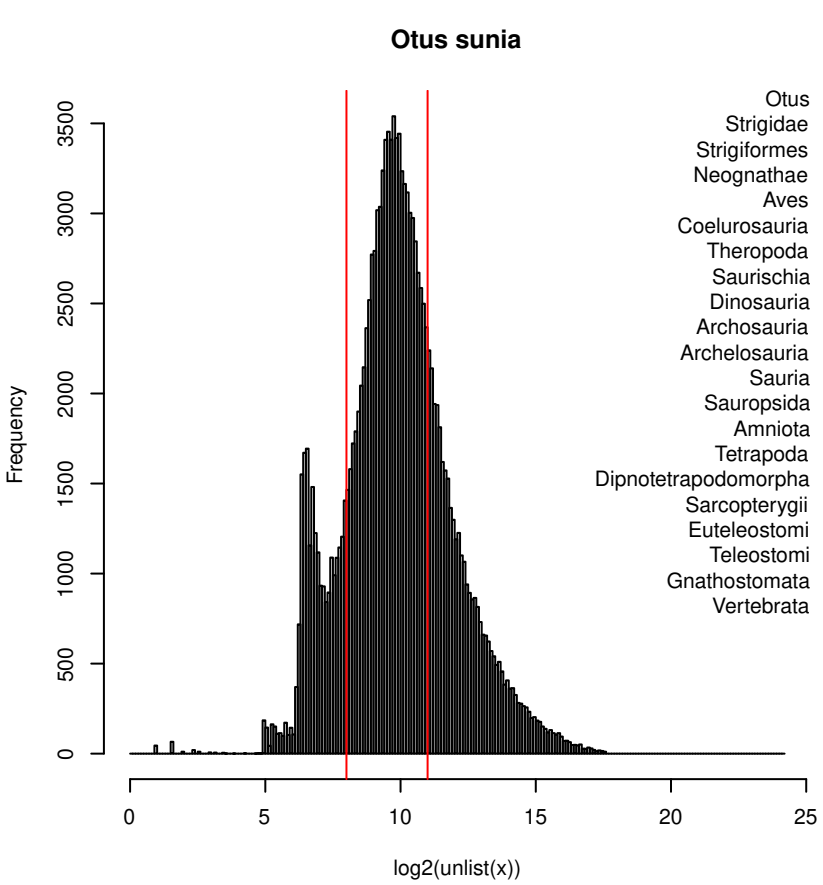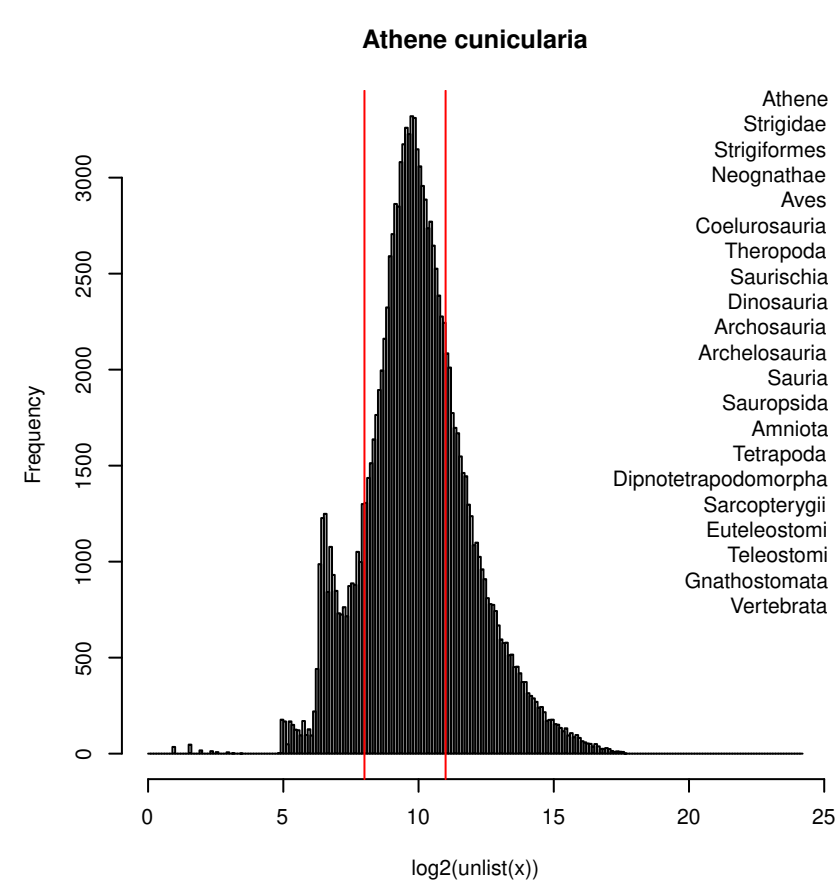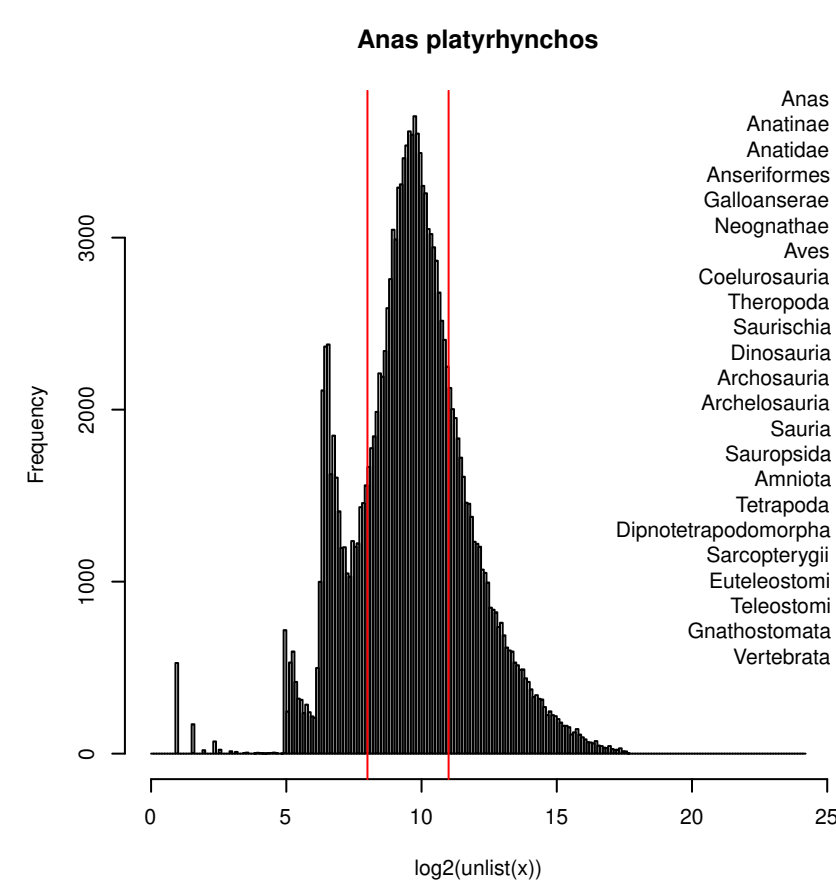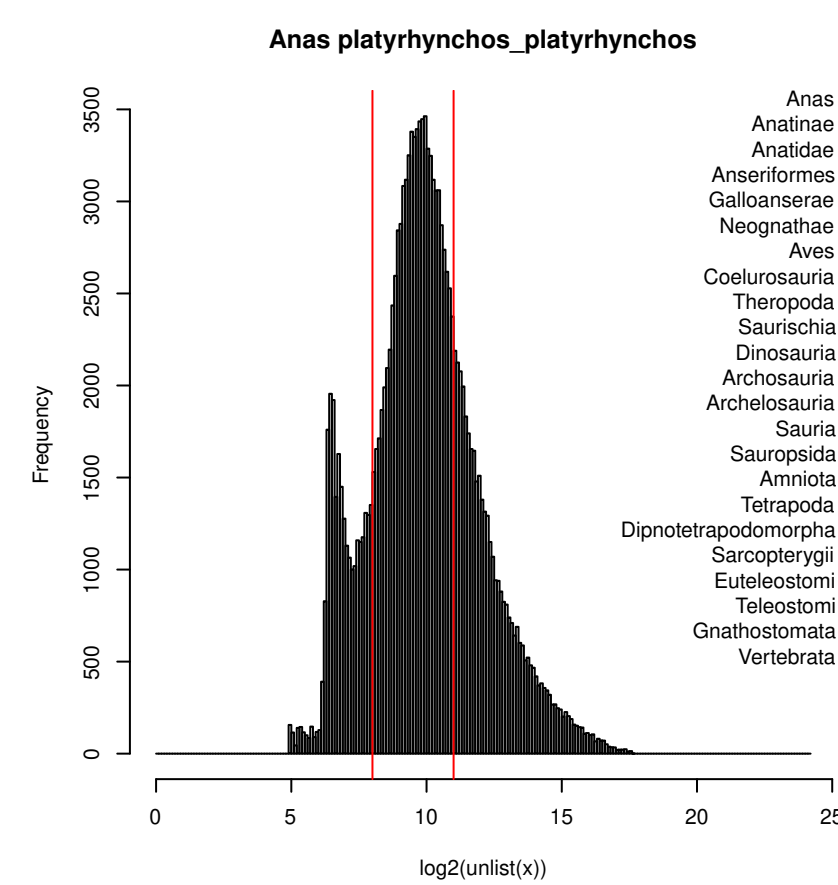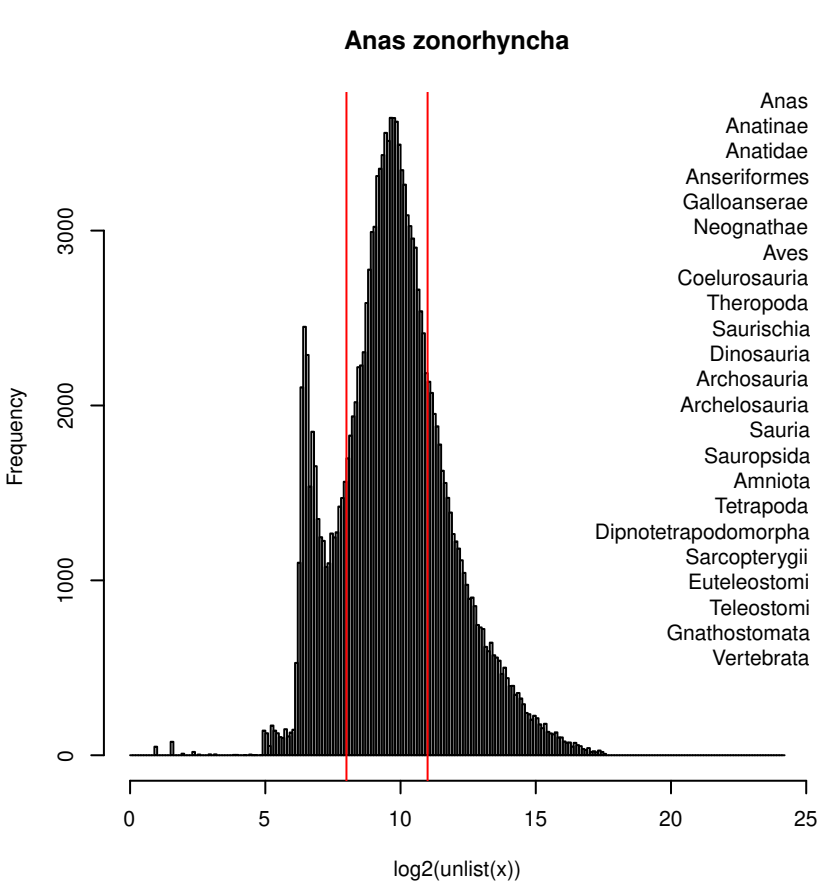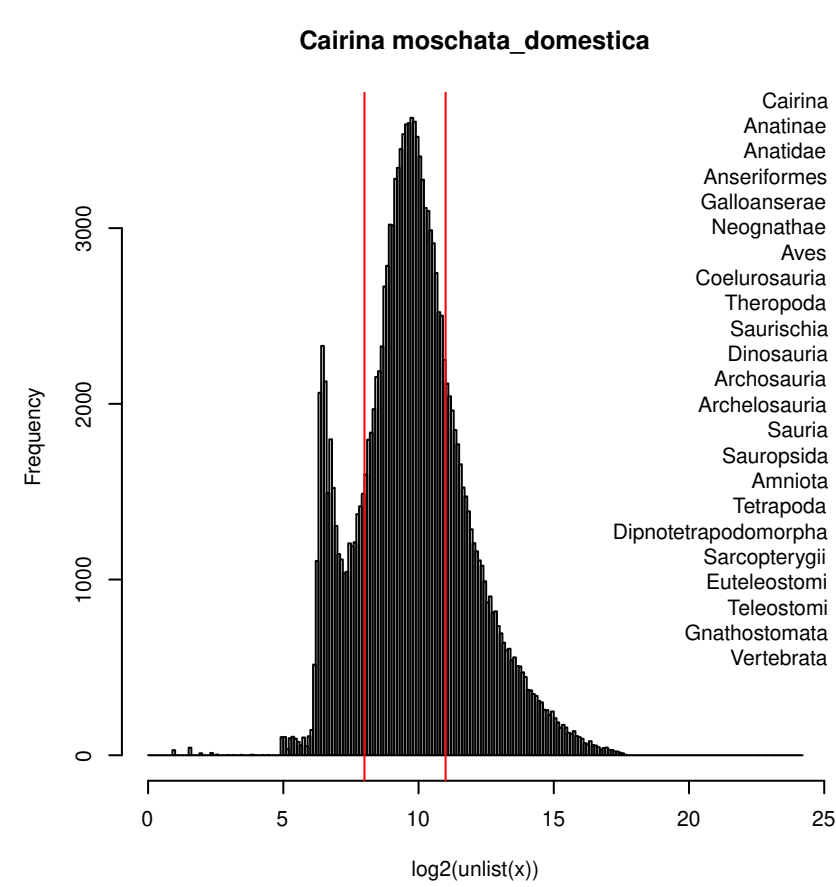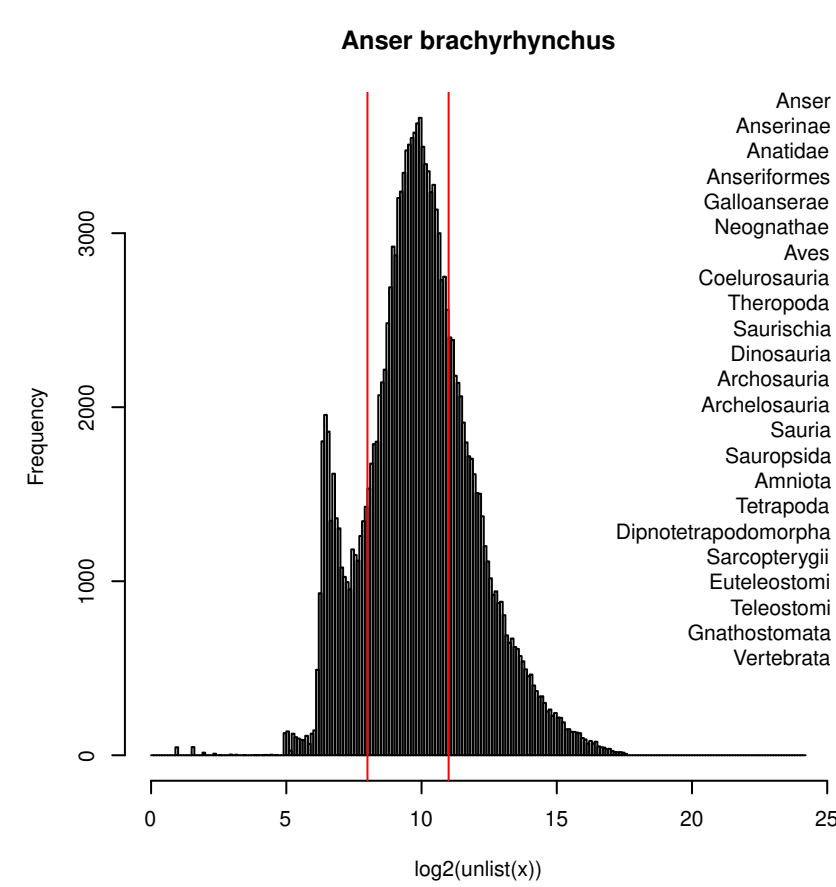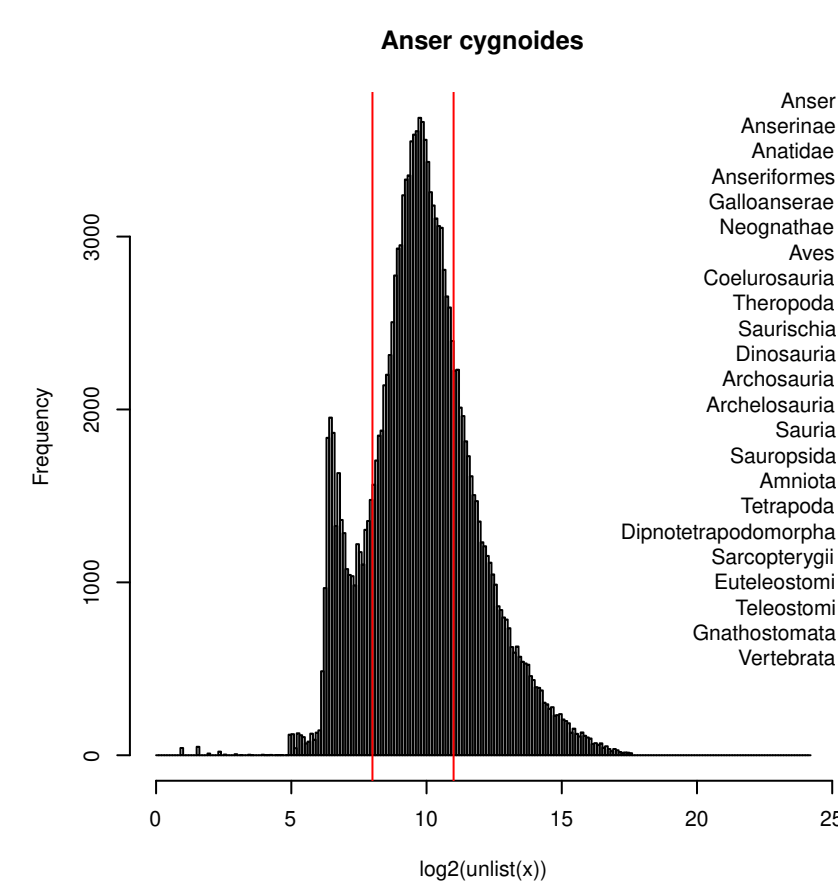

**Numida meleagris**

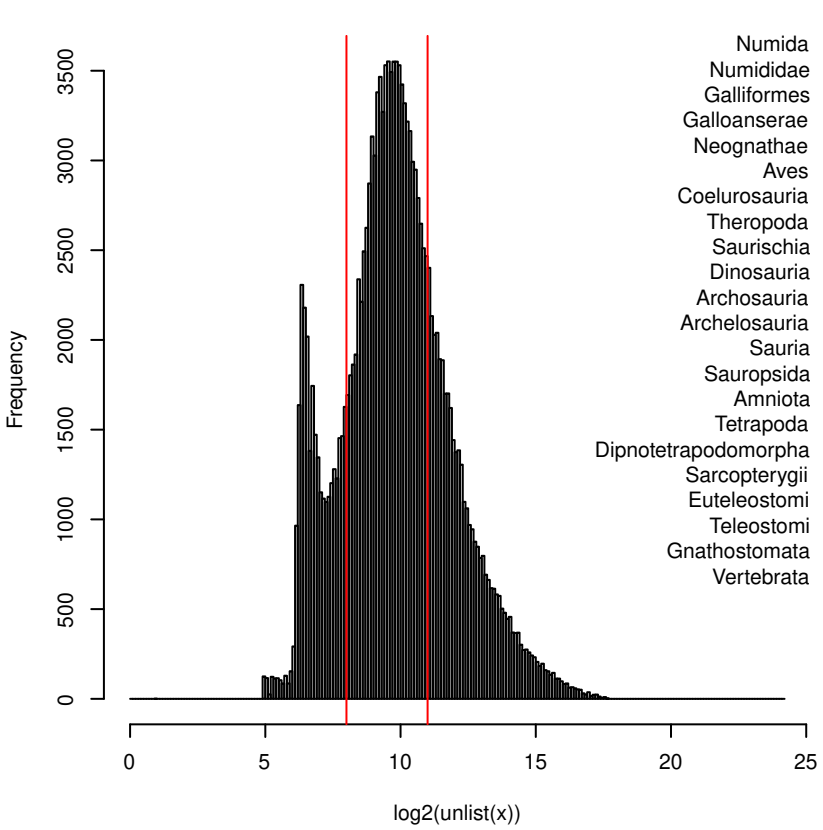

**Gallus gallus**

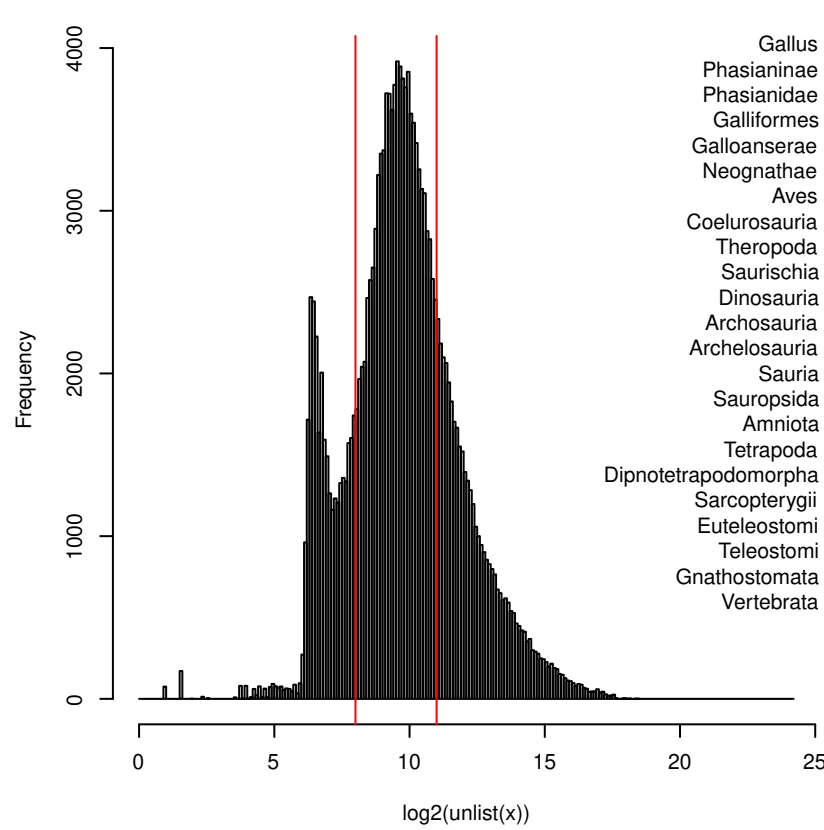

**Pavo cristatus**

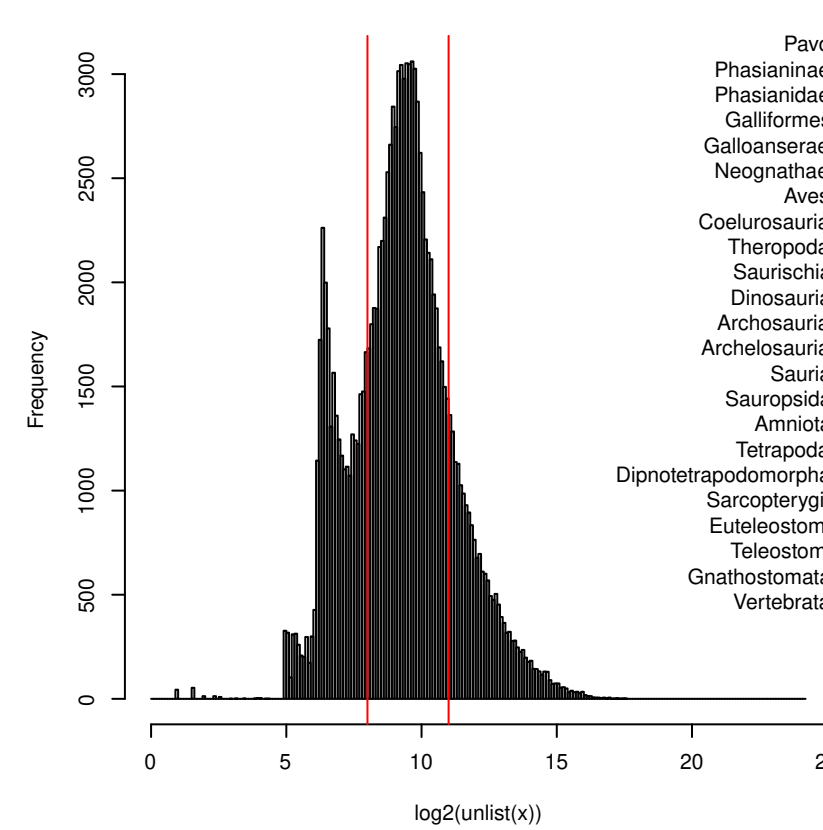

**Phasianus colchicus**

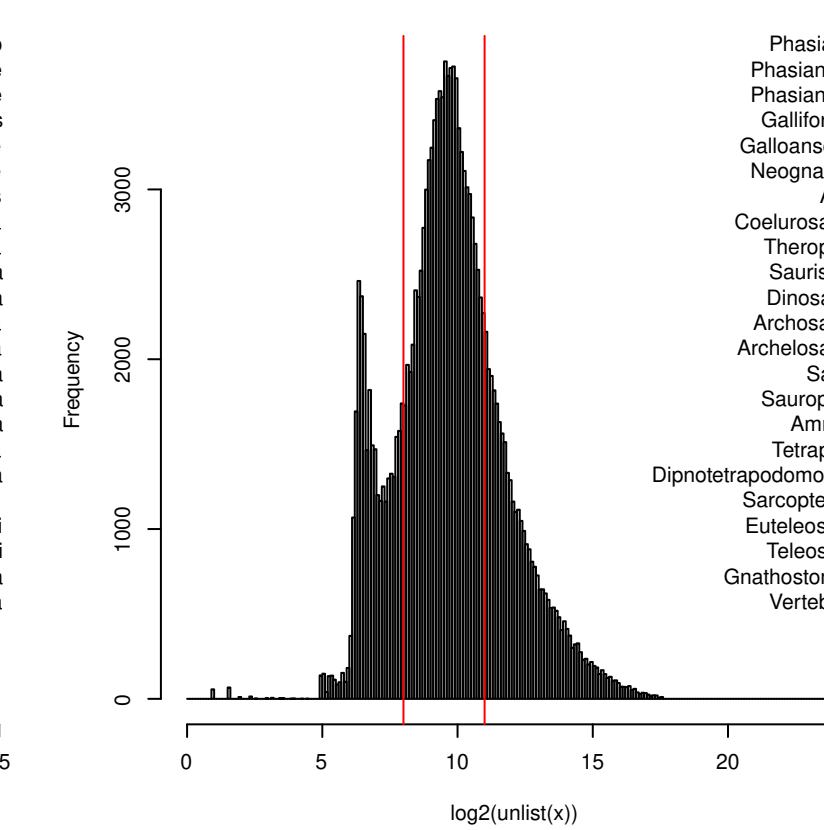

**Chrysolophus pictus**

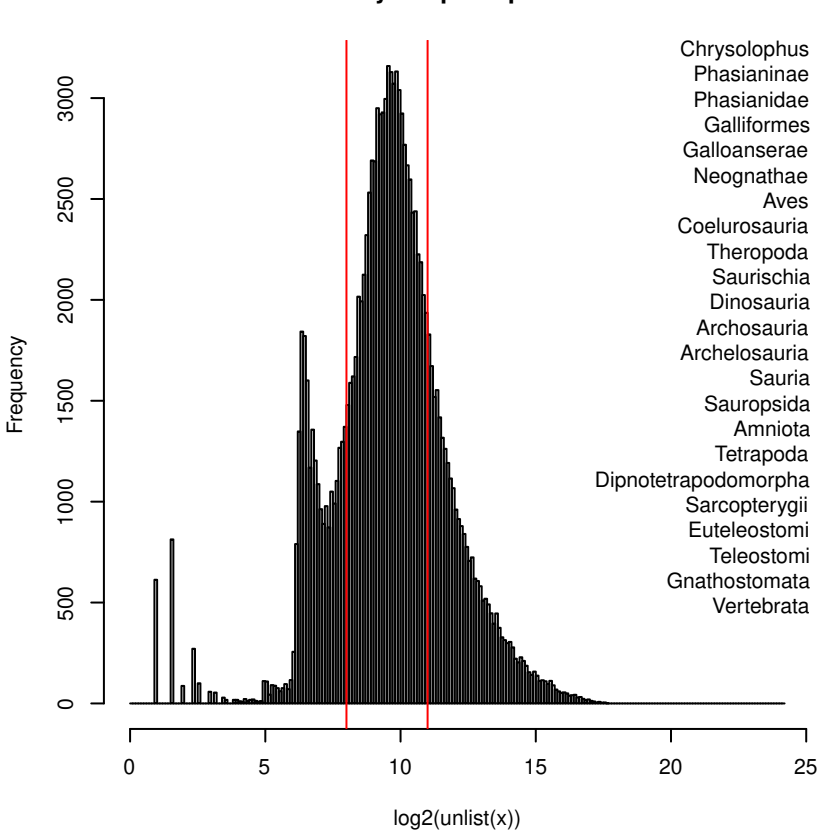

**Coturnix japonica**

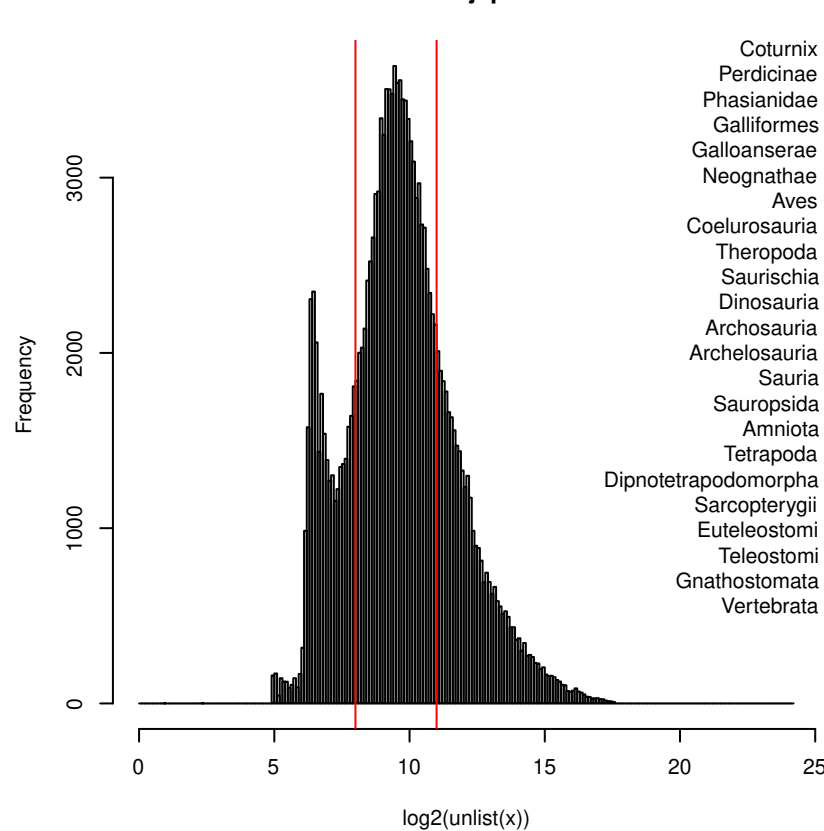

**Meleagris gallopavo**

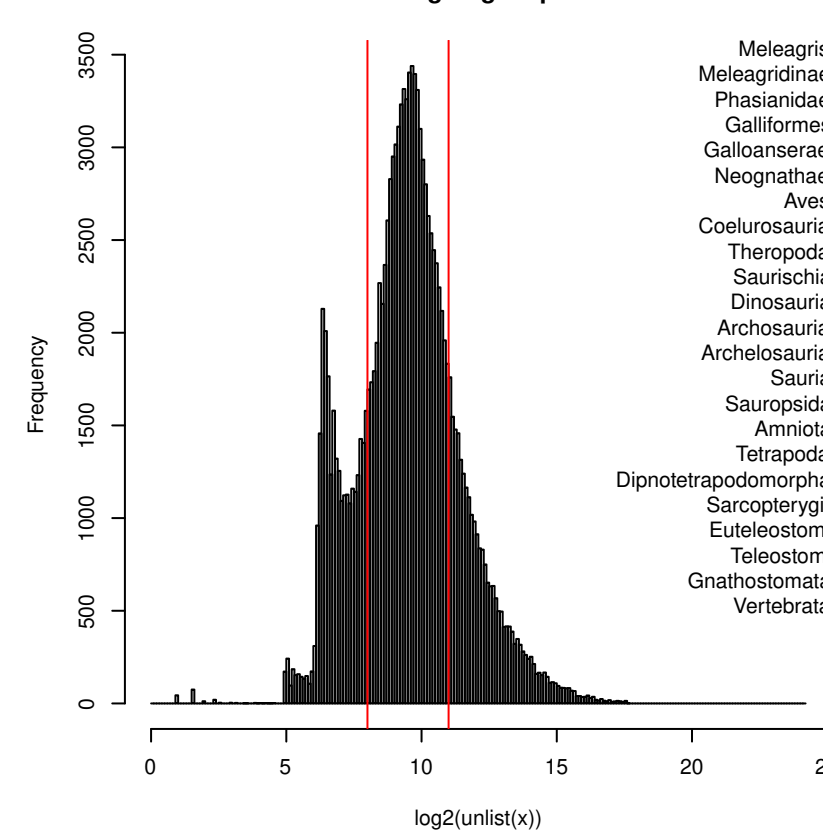

**Accipiter nisus**

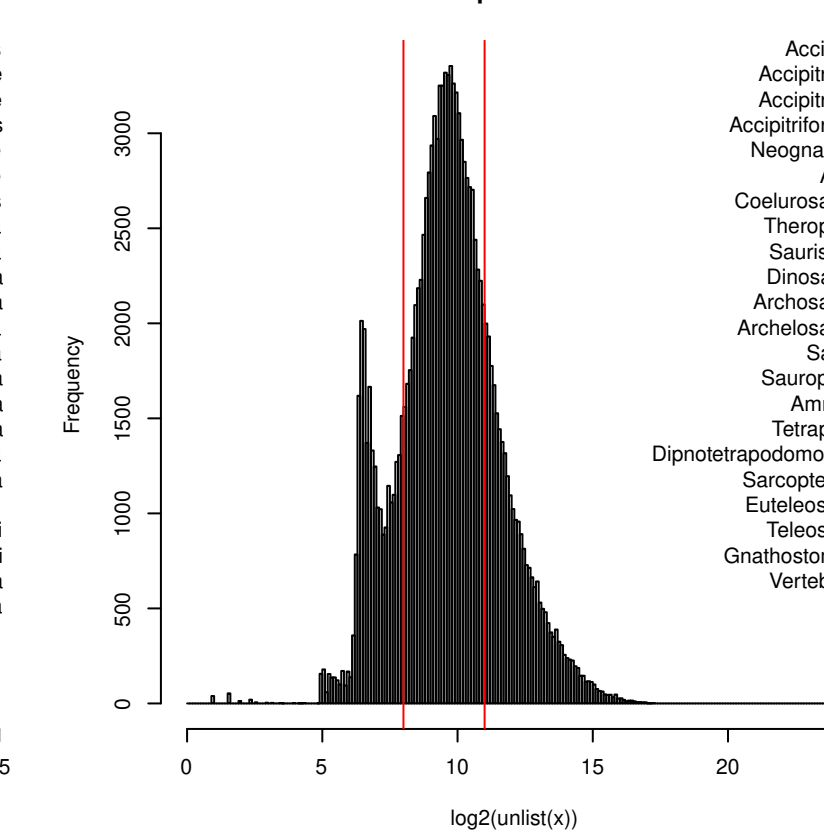

**Aquila chrysaetos\_chrysaetos**

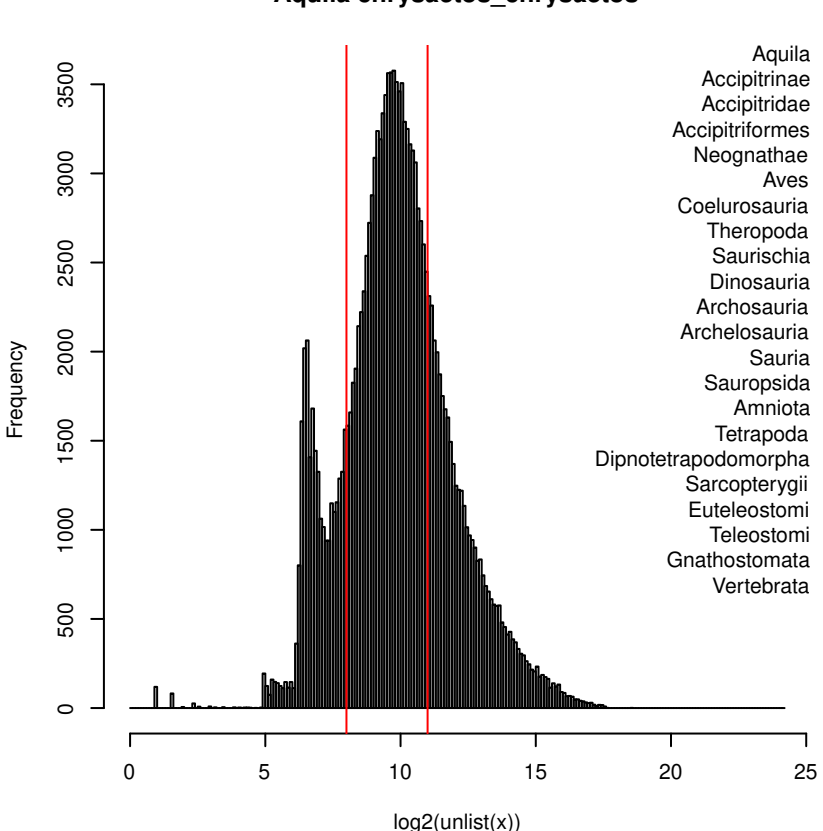

**Buteo japonicus**

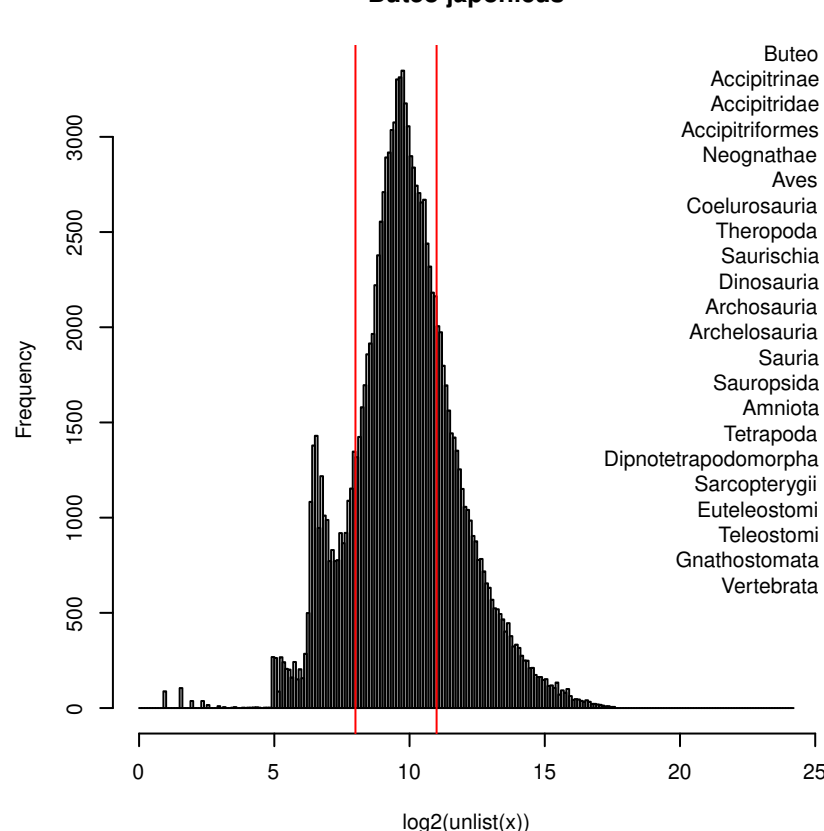

**Crocodylus porosus**

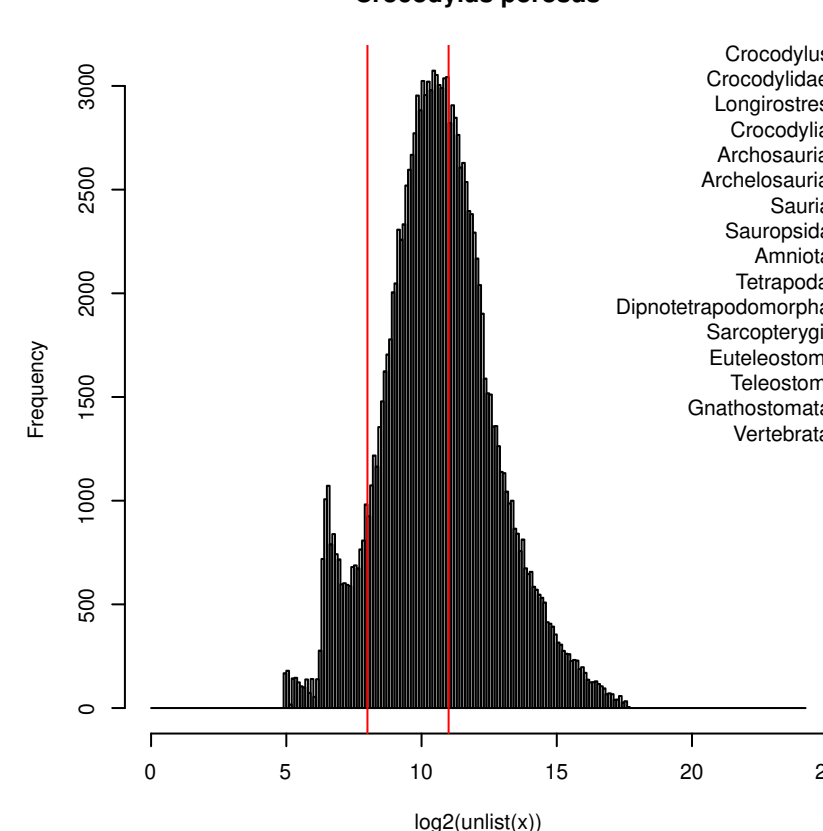

**Pelusios castaneus**

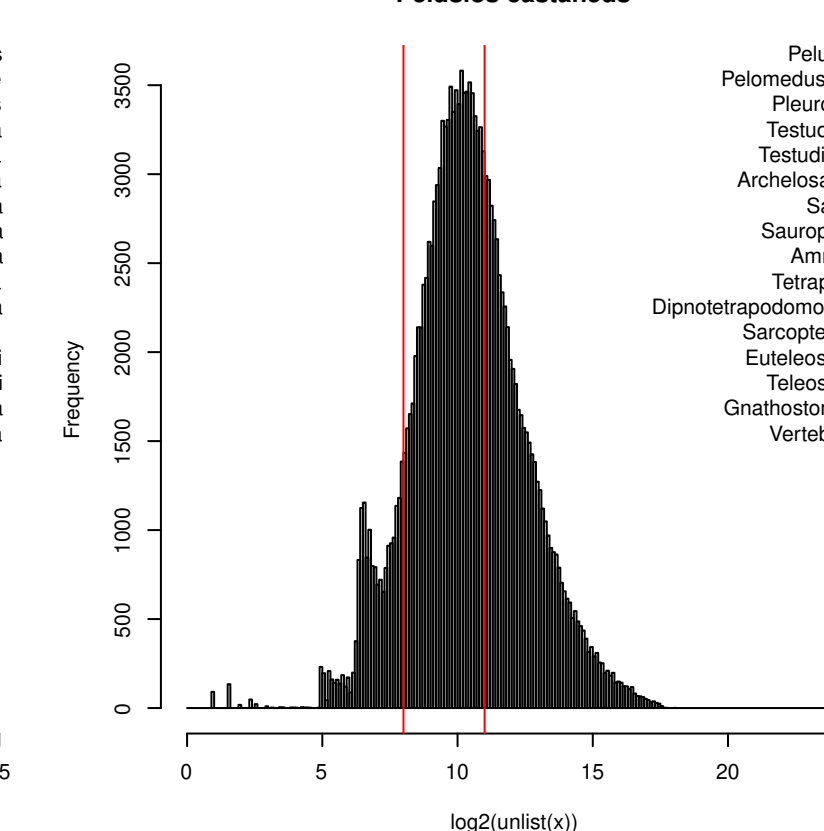

**Pelodiscus sinensis**

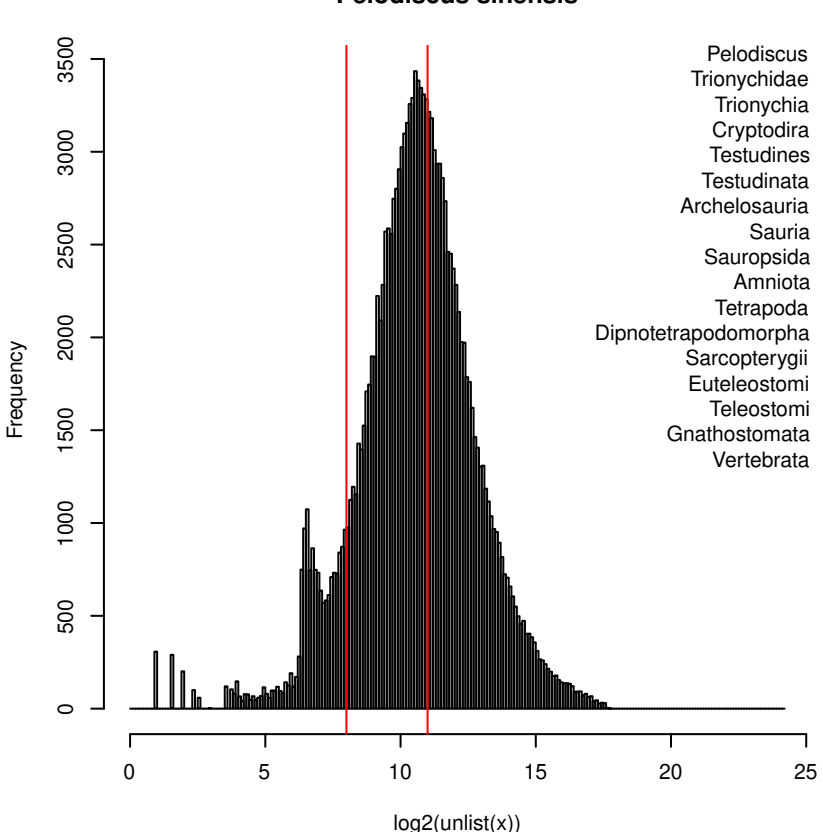

**Chrysemys picta\_bellii**

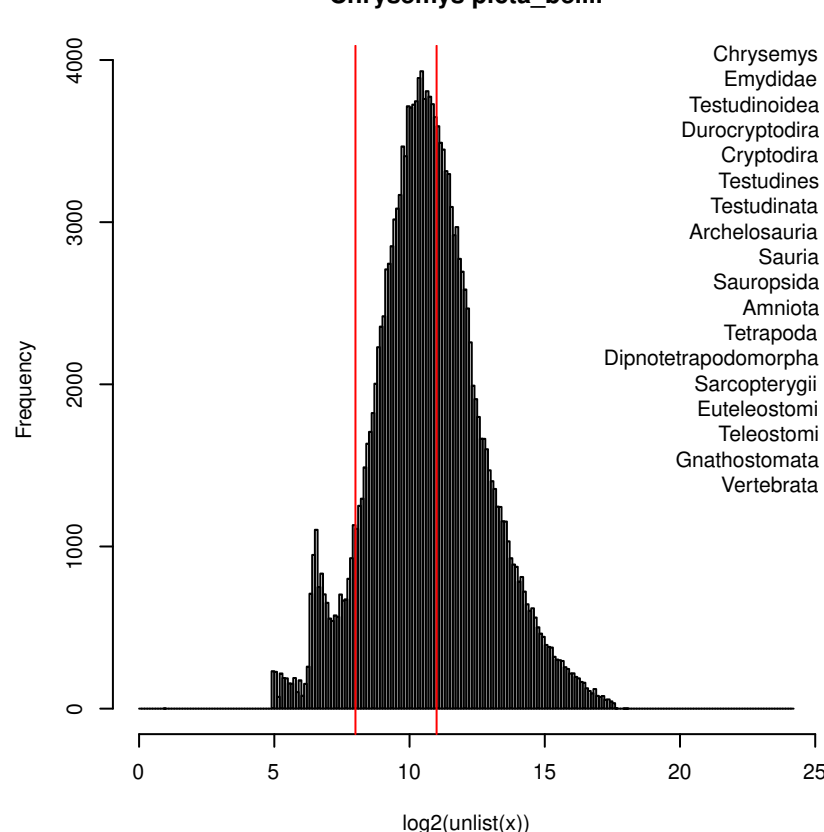

**Terrapene carolina\_trianguis**

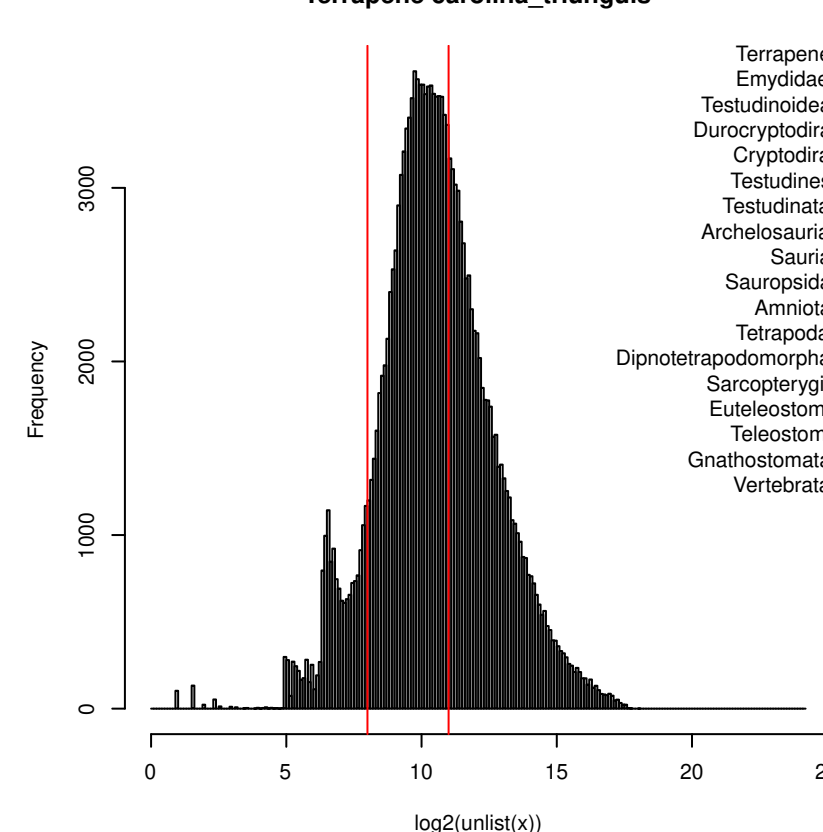

**Gopherus agassizii**

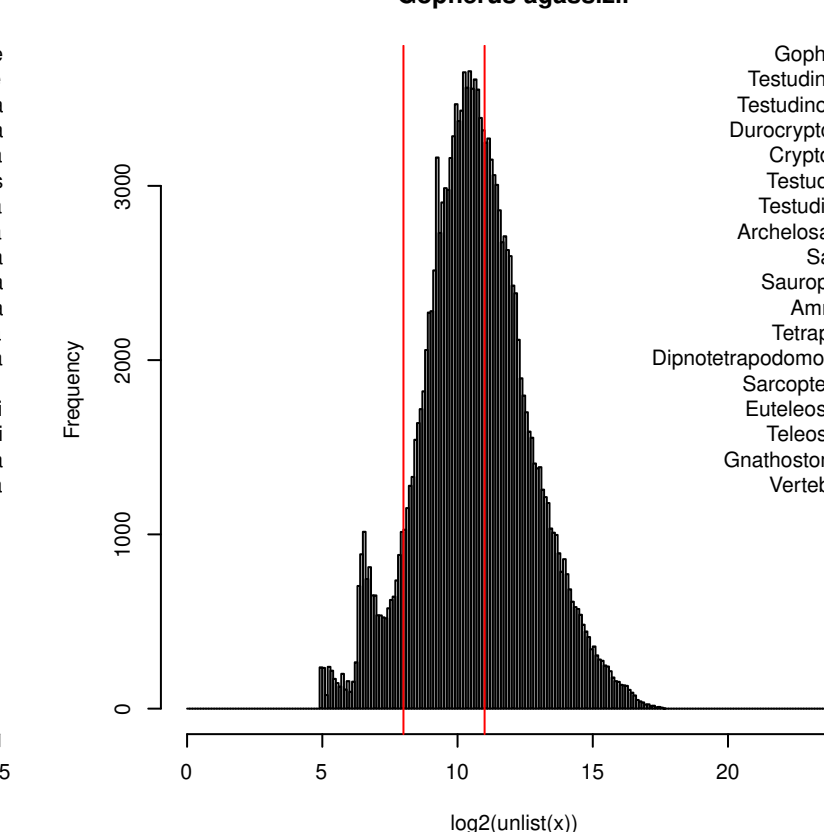

**Gopherus evgoodei**

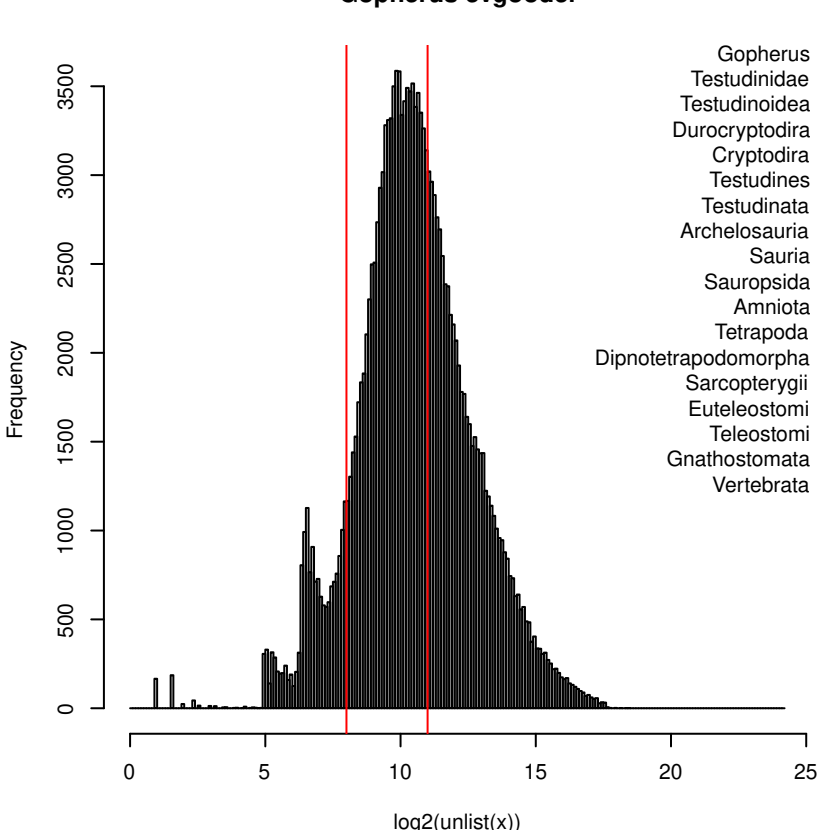

**Chelonoidis abingdonii**

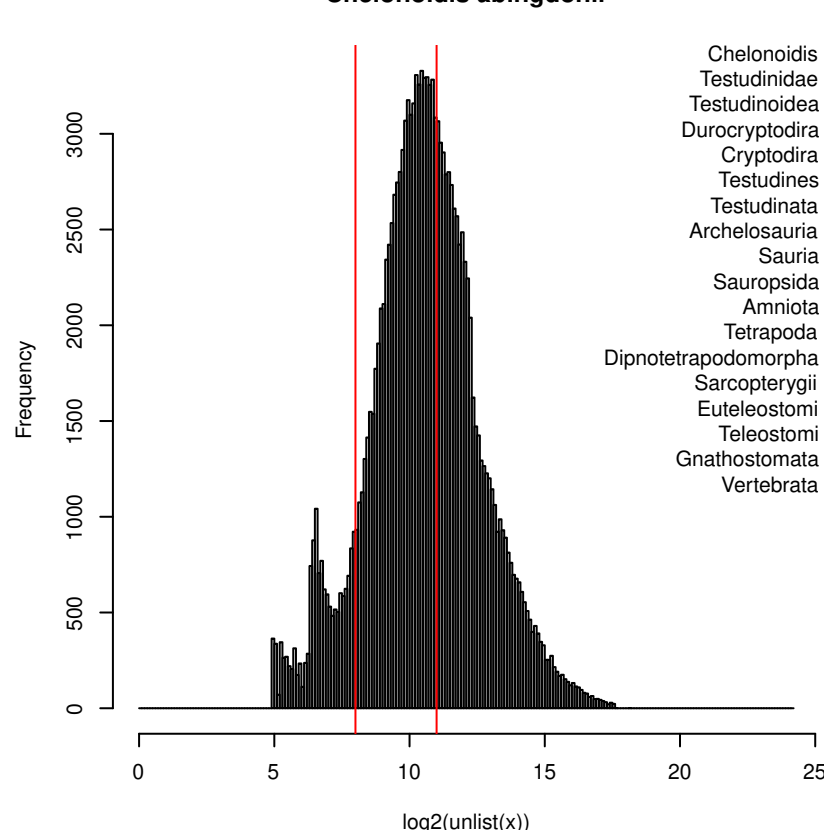

**Chelydra serpentina**

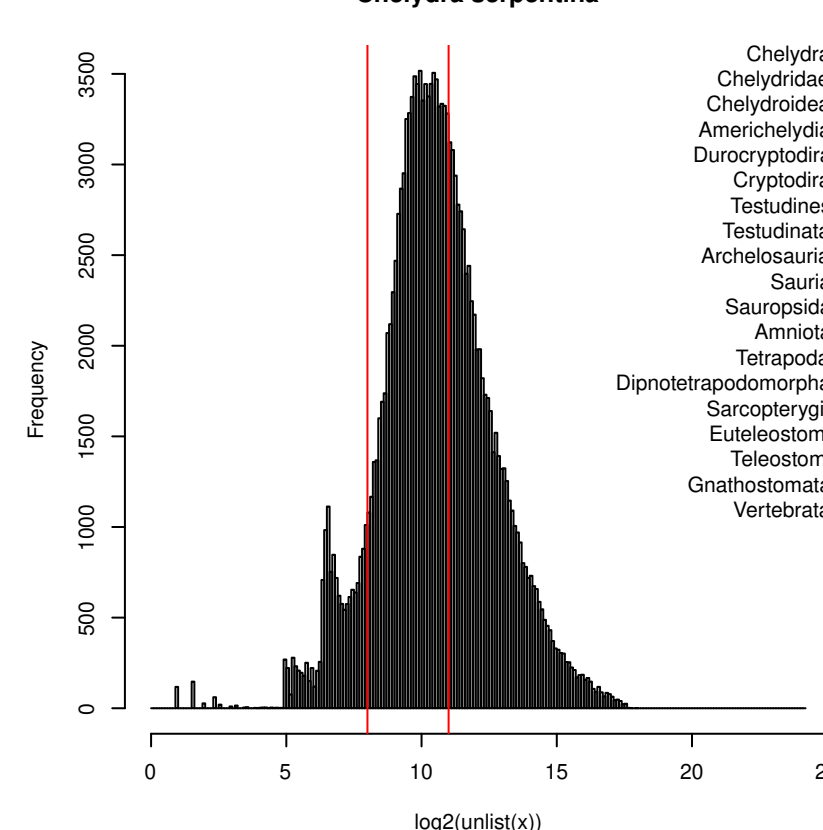

**Ornithorhynchus anatinus**

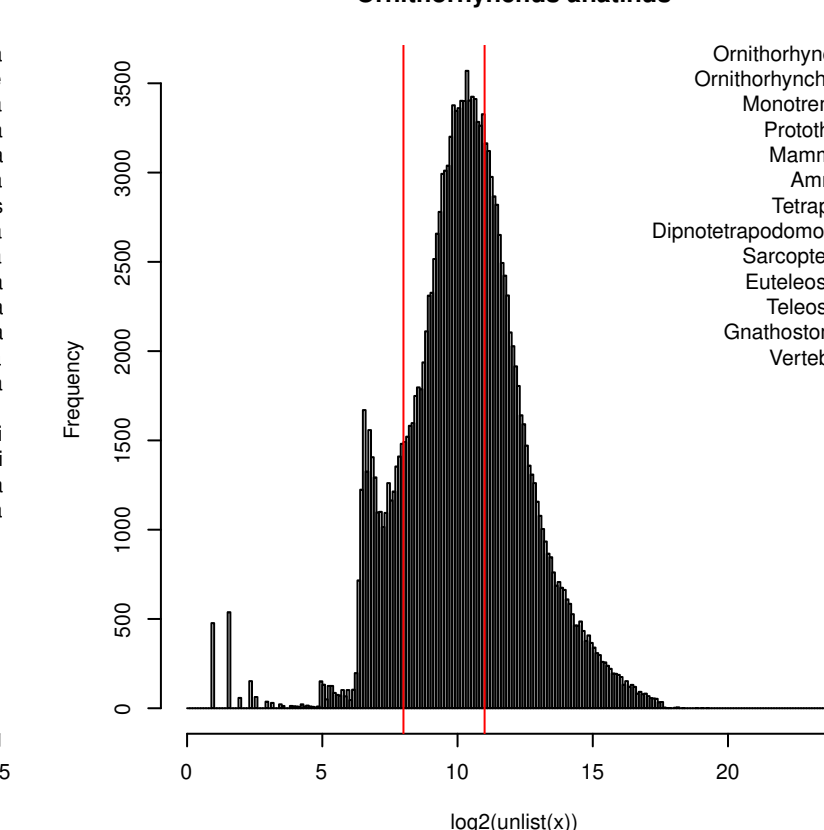



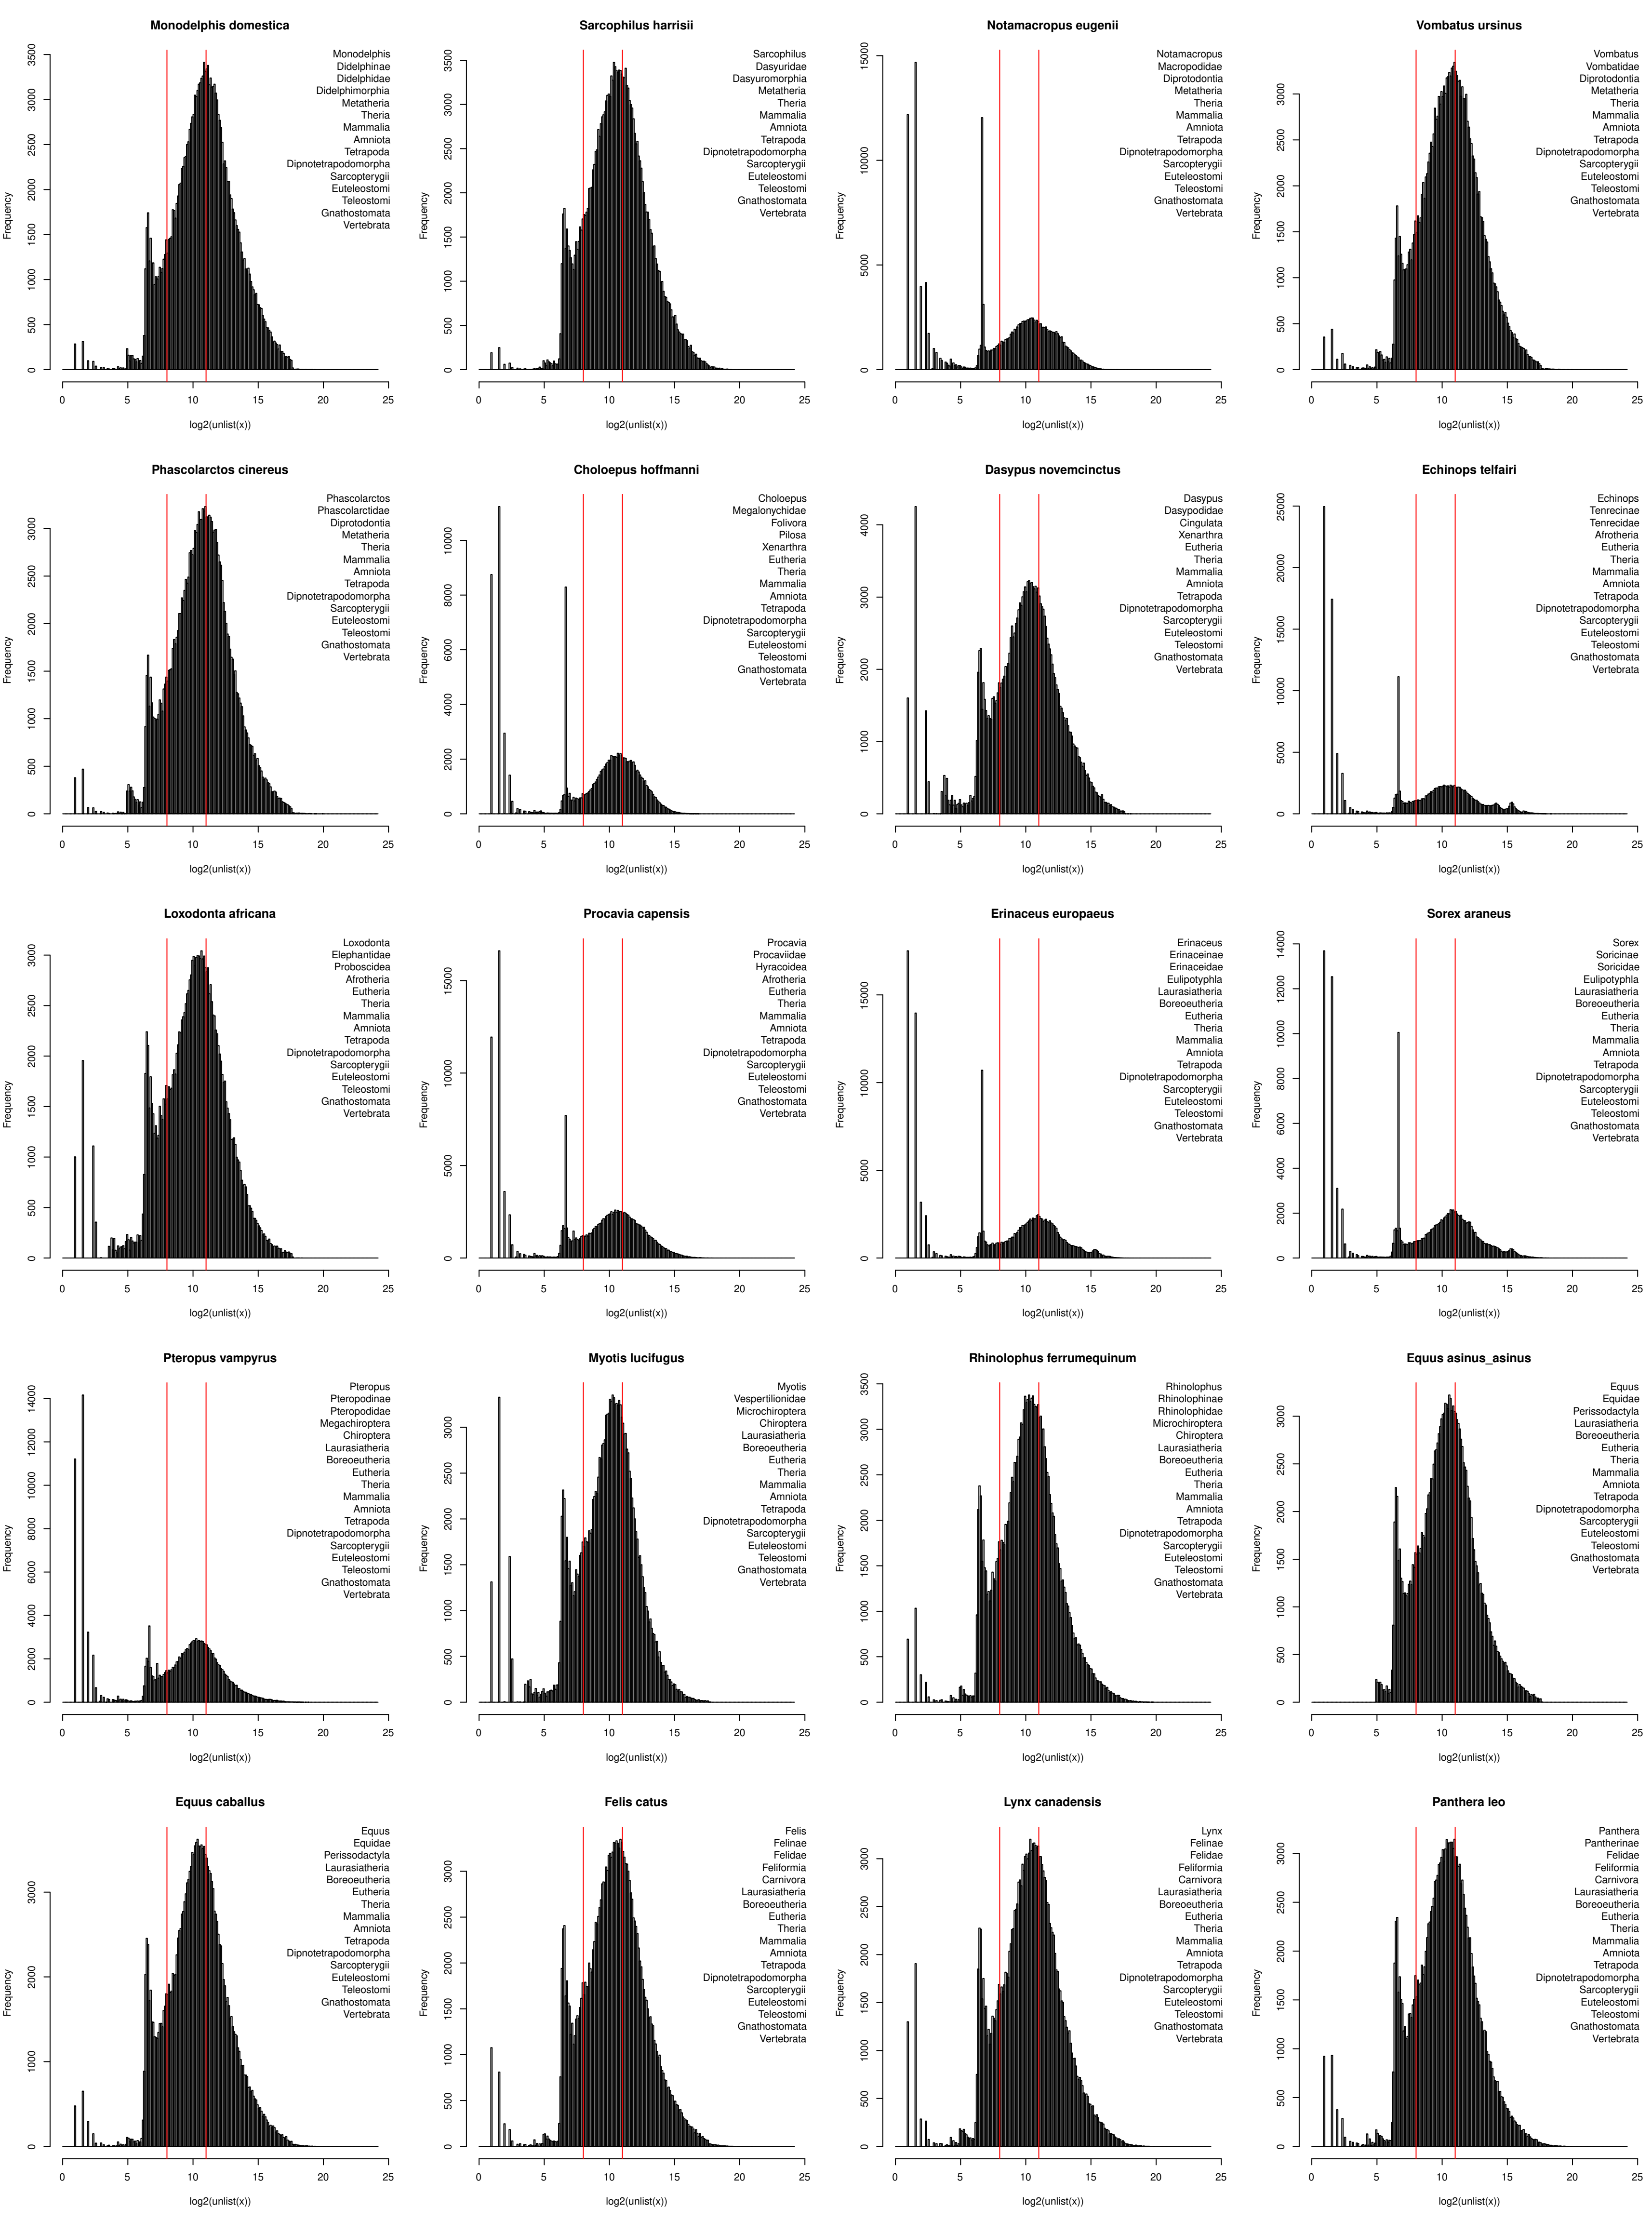

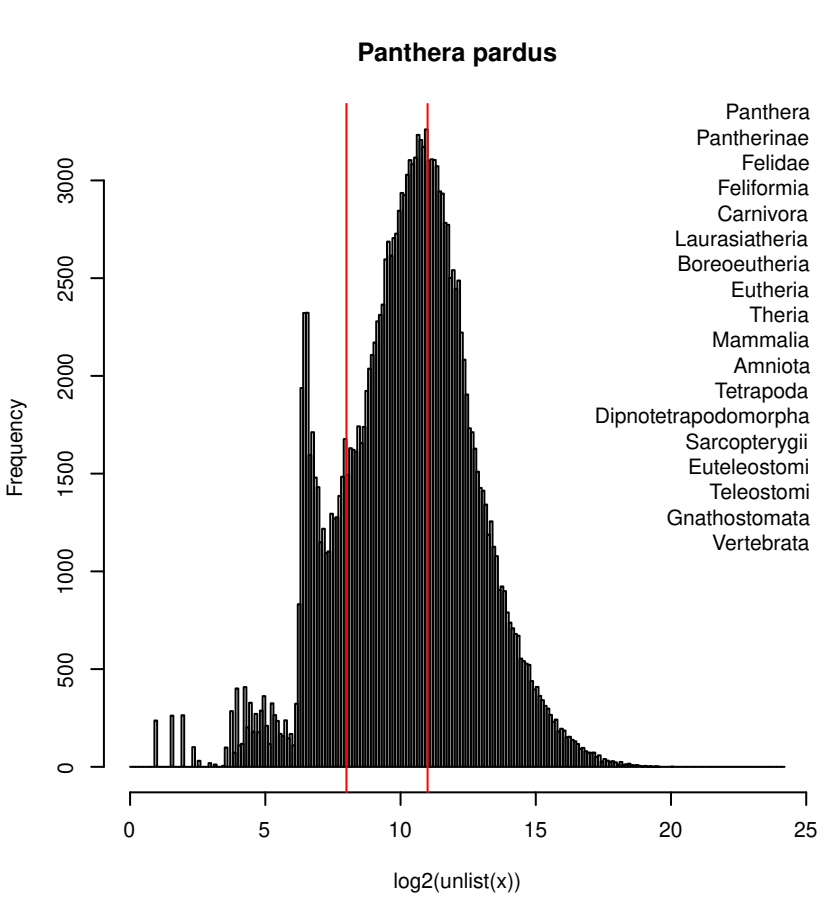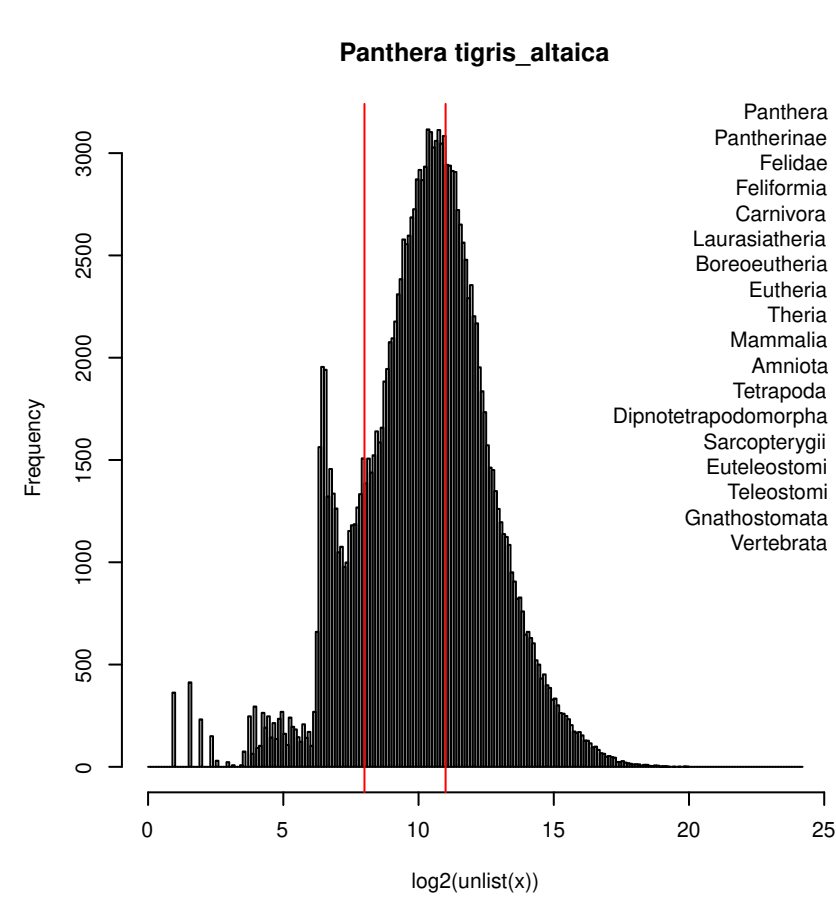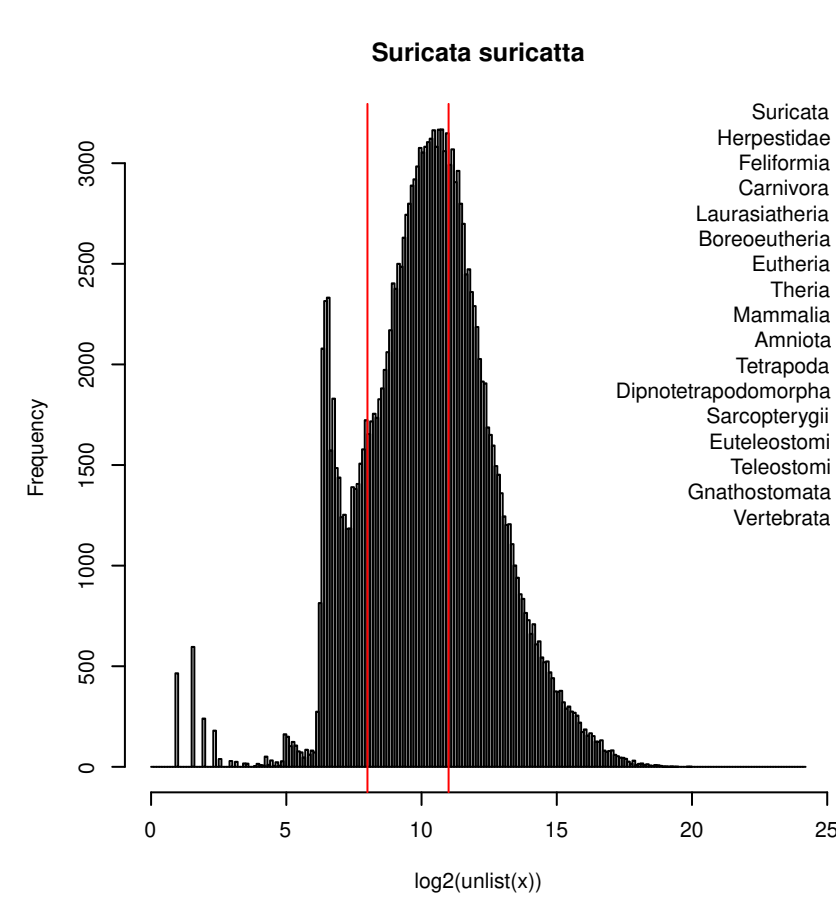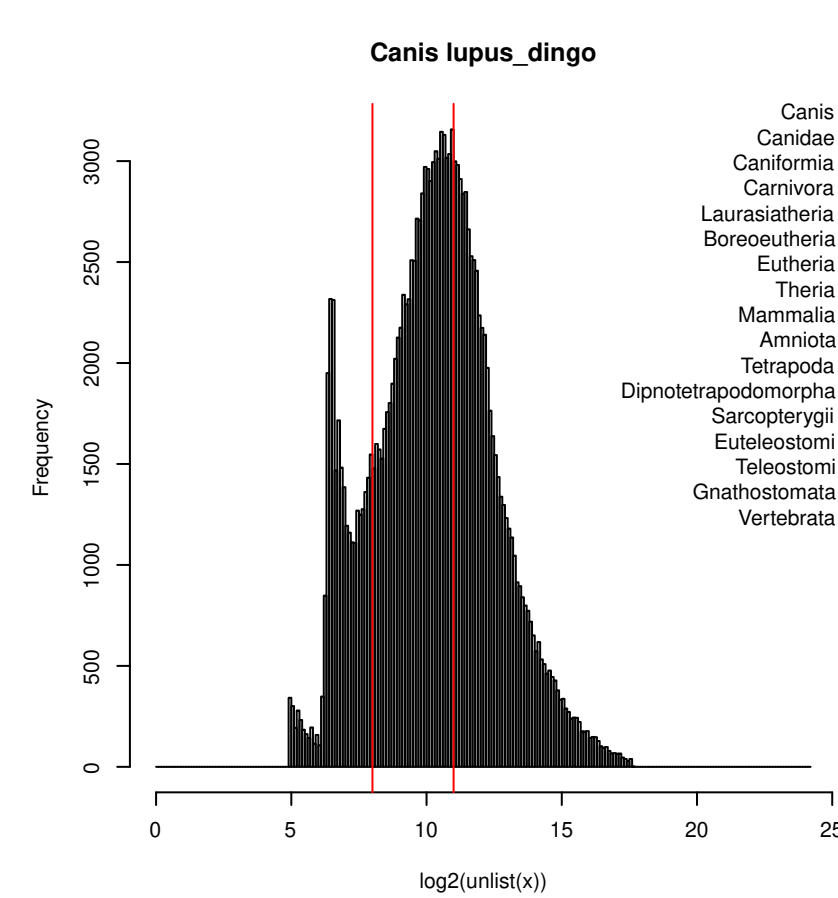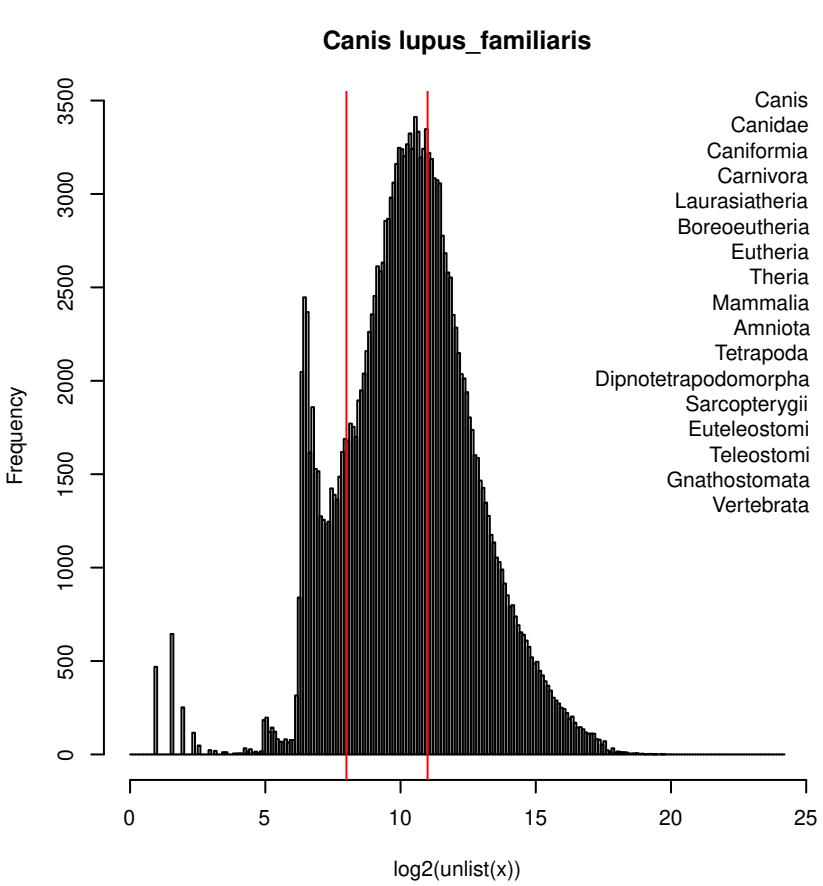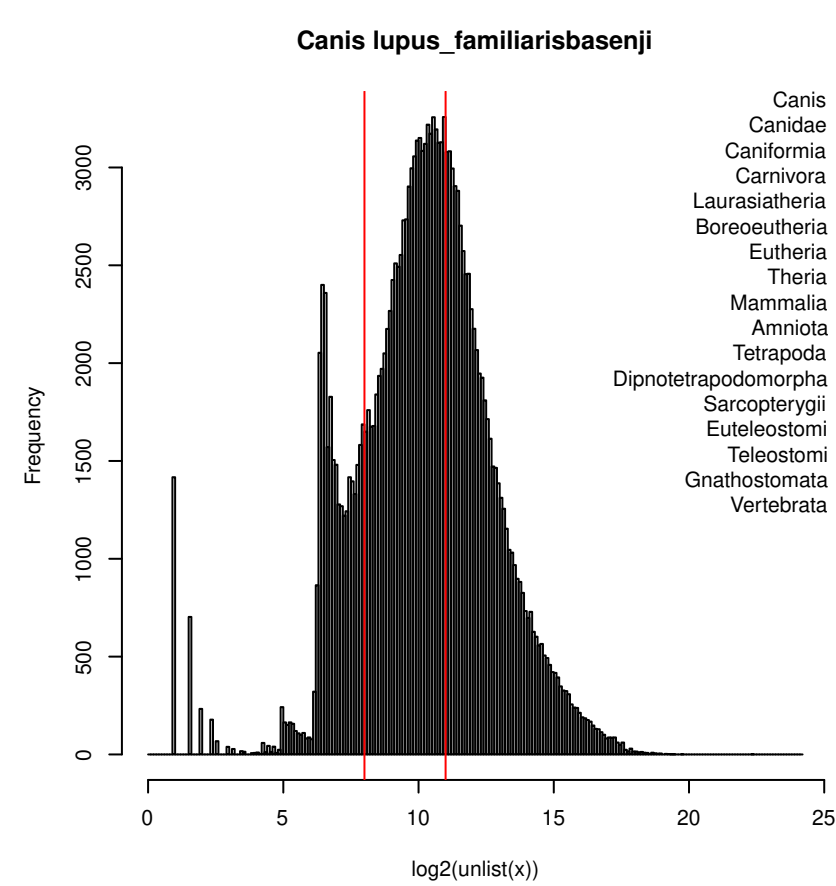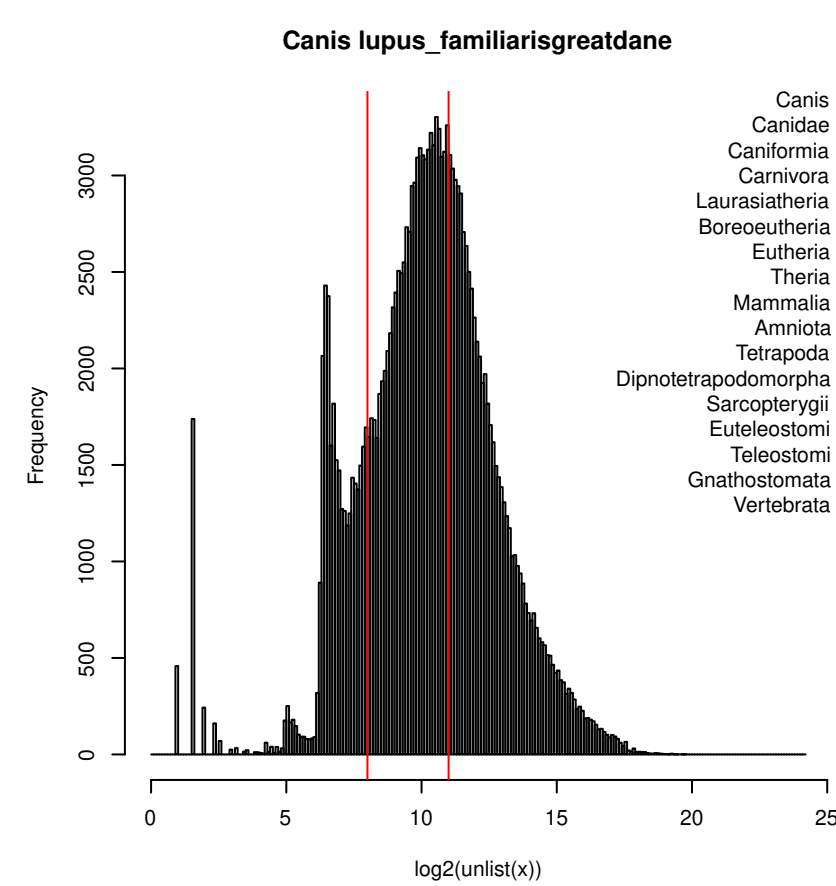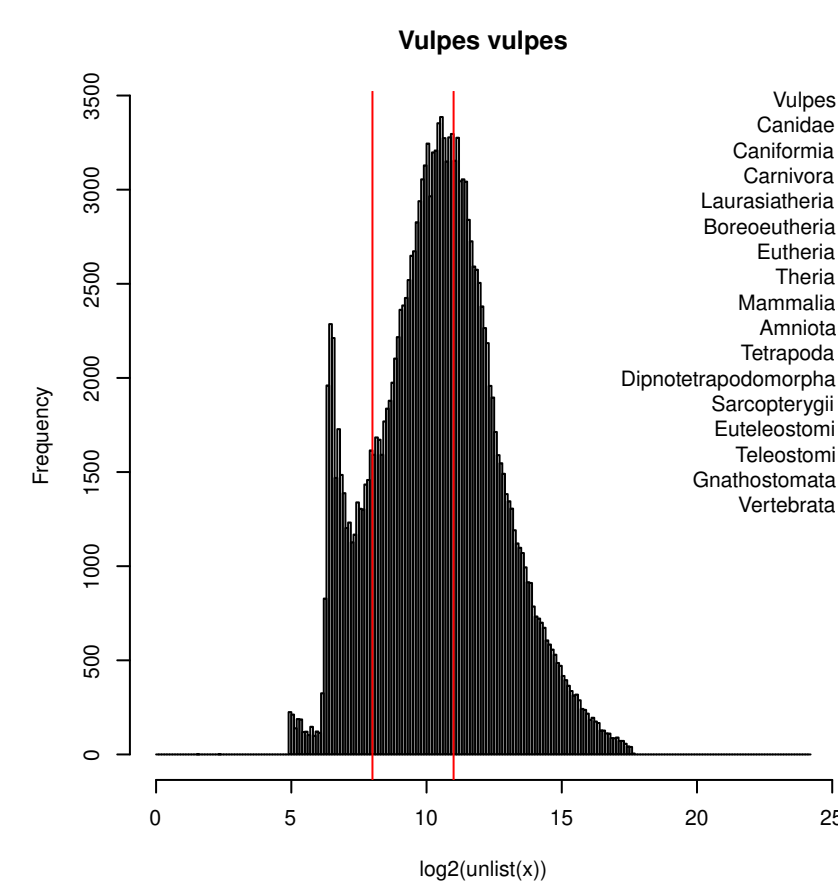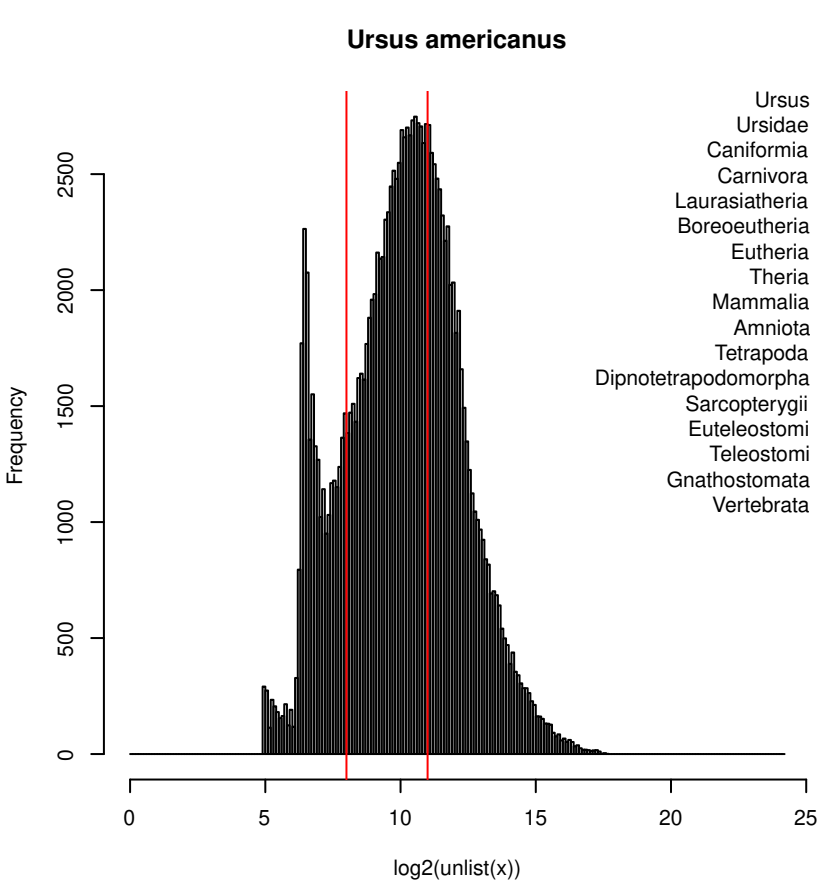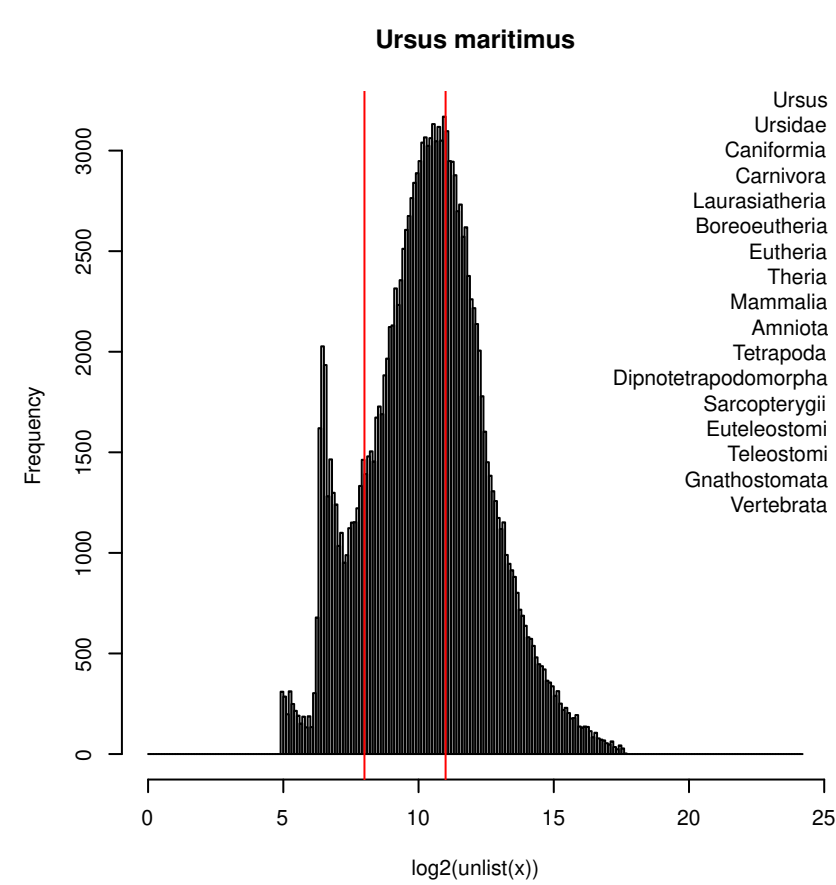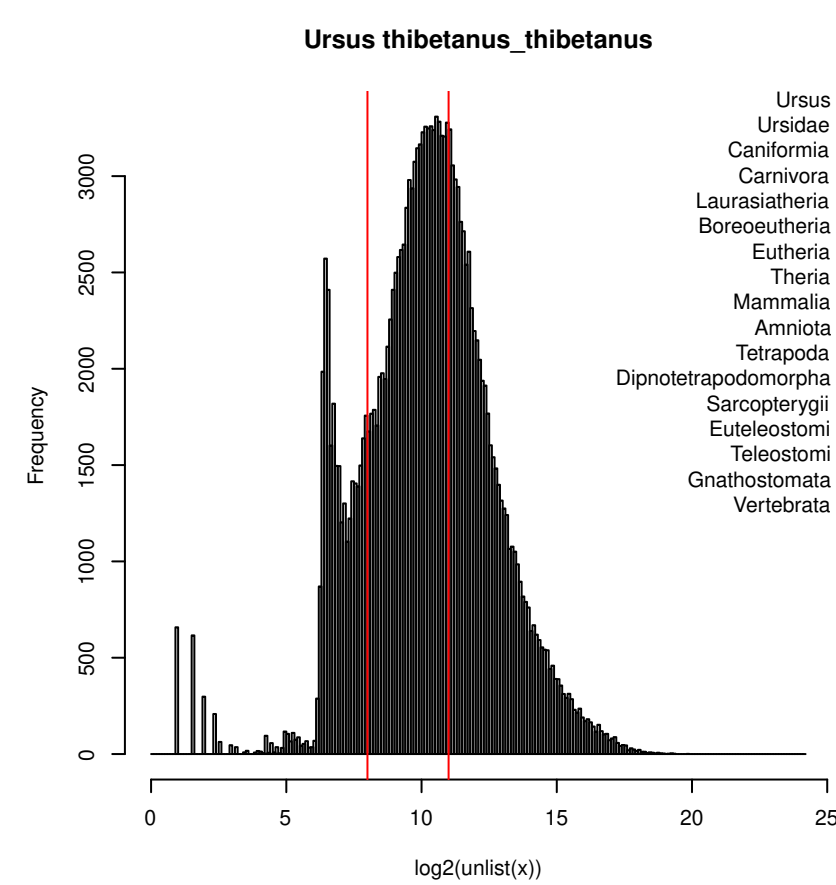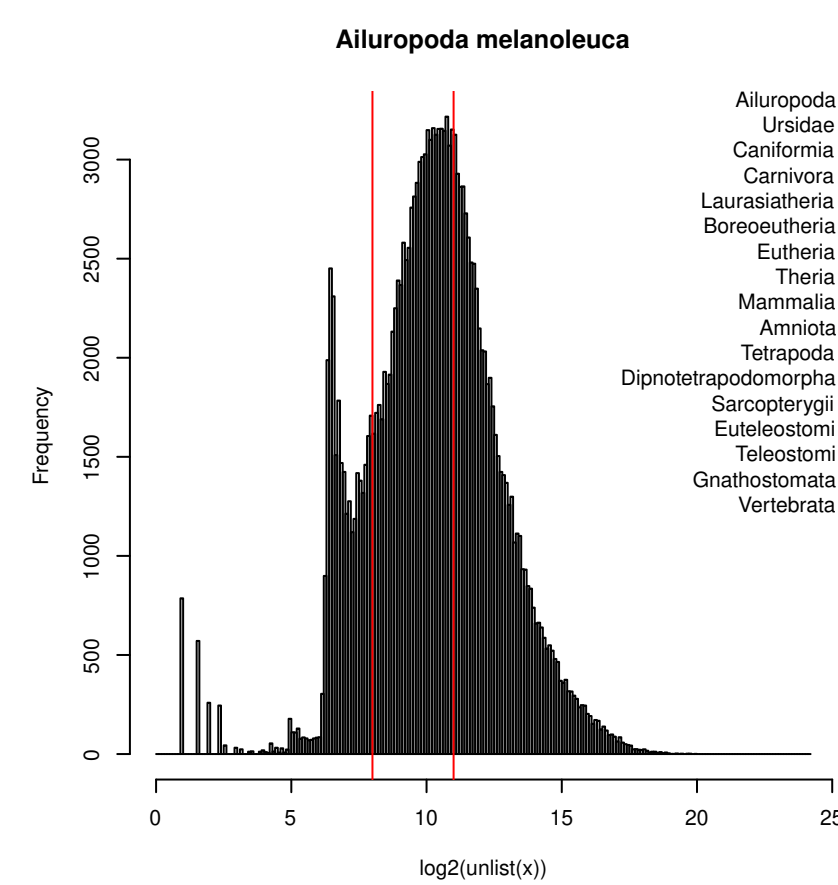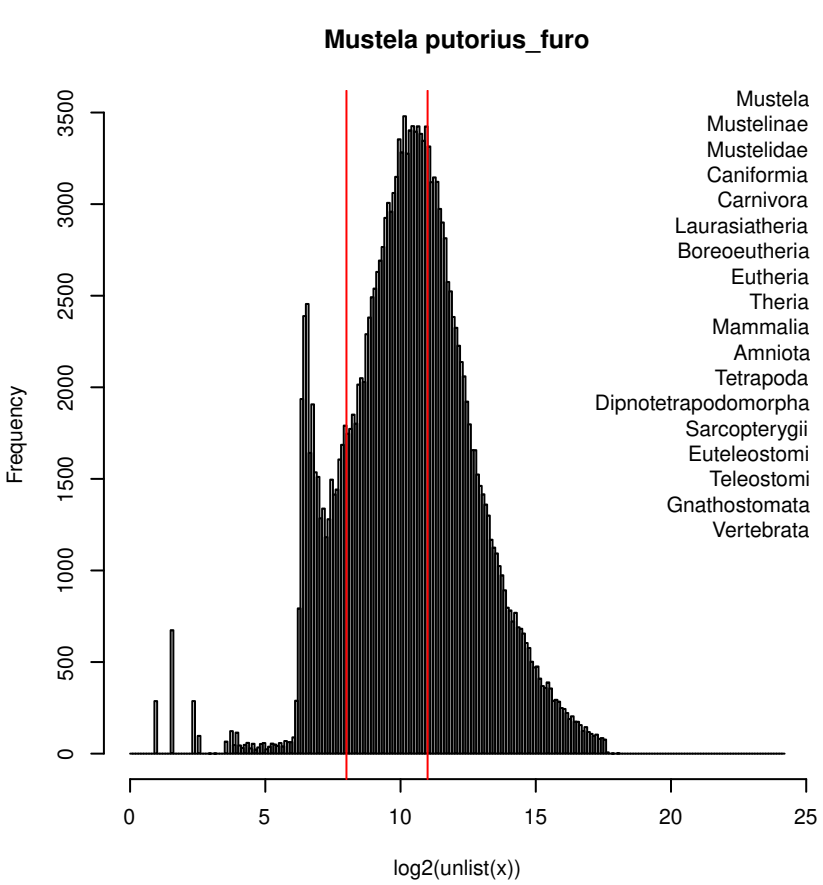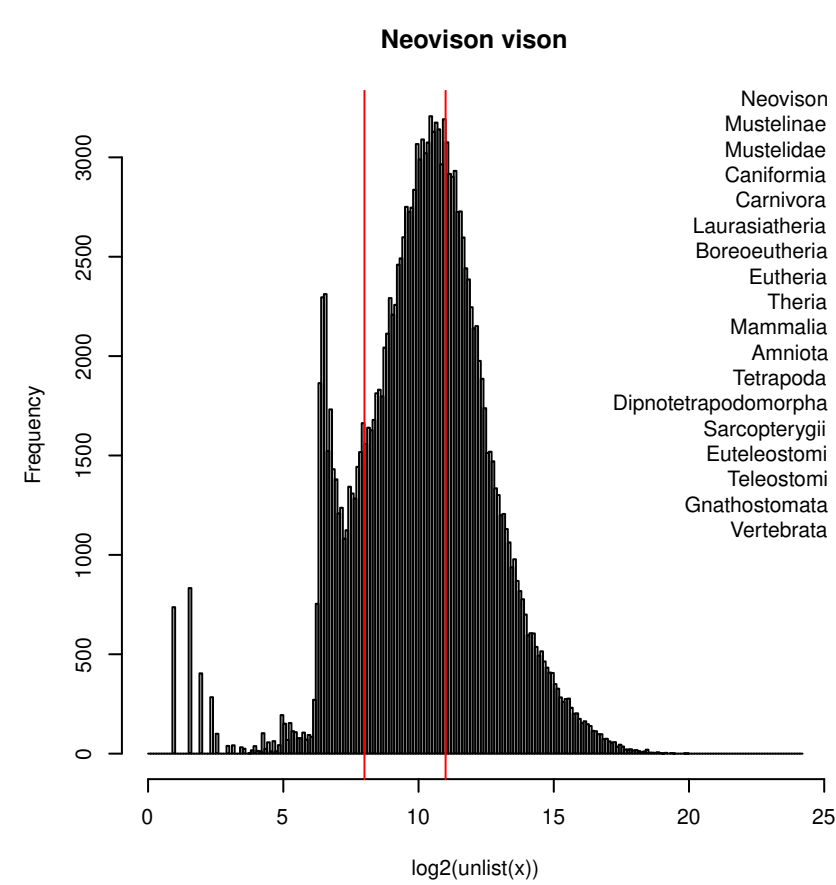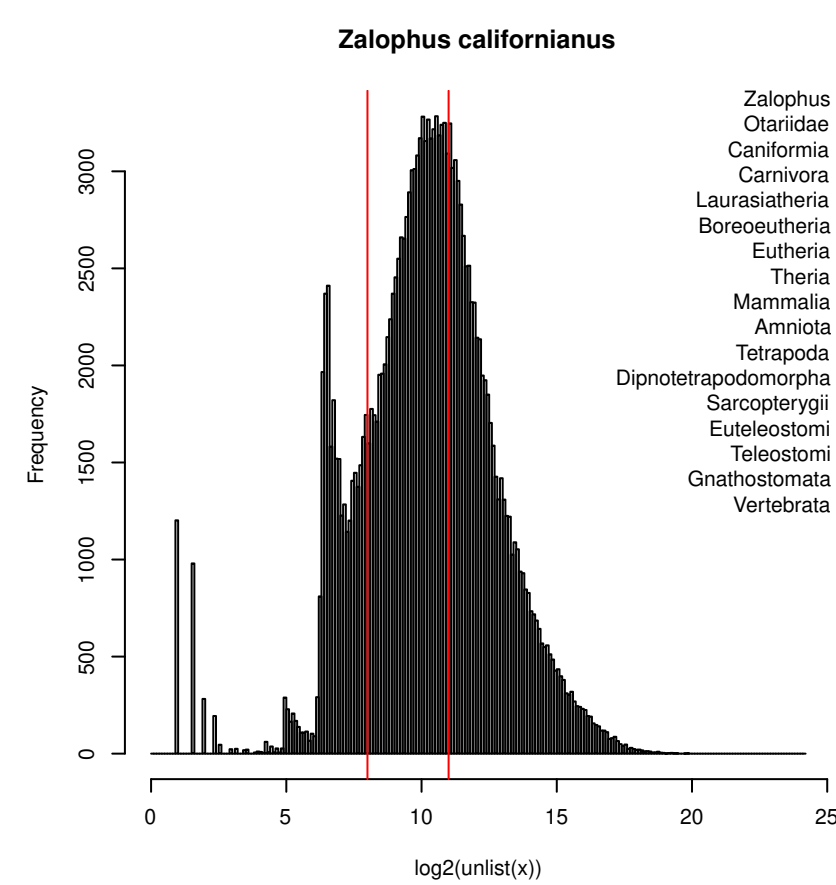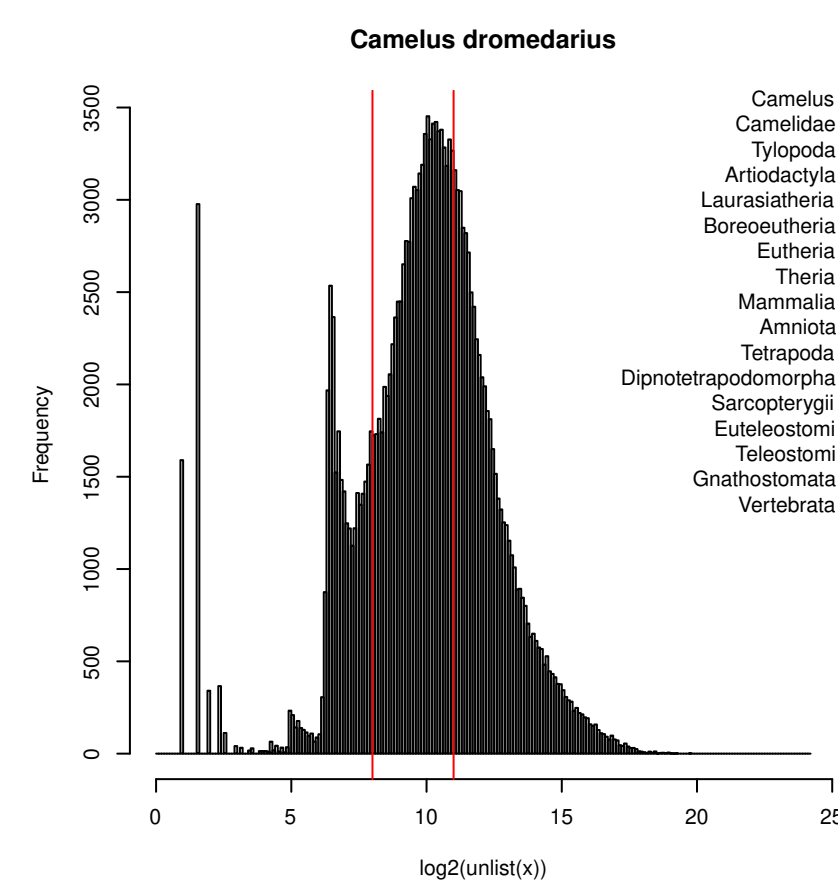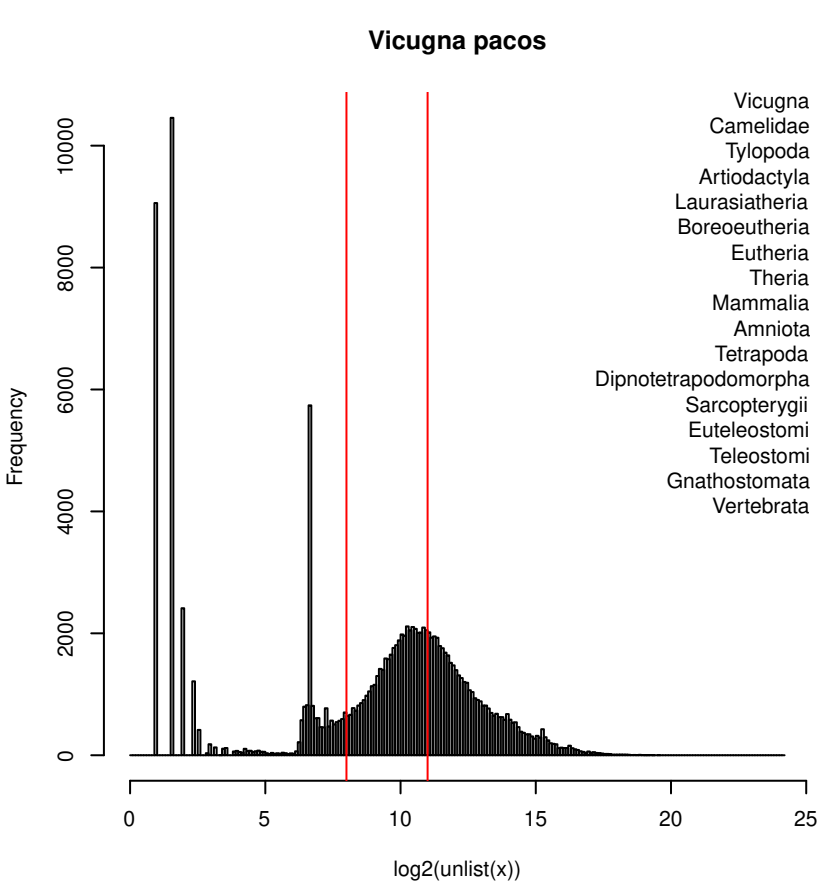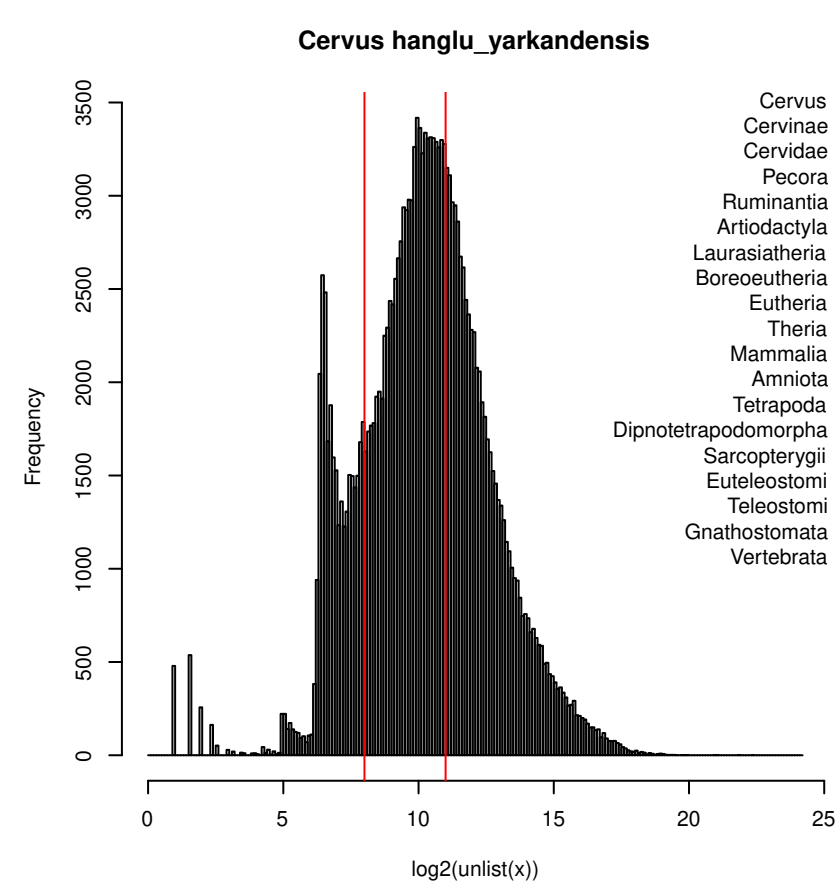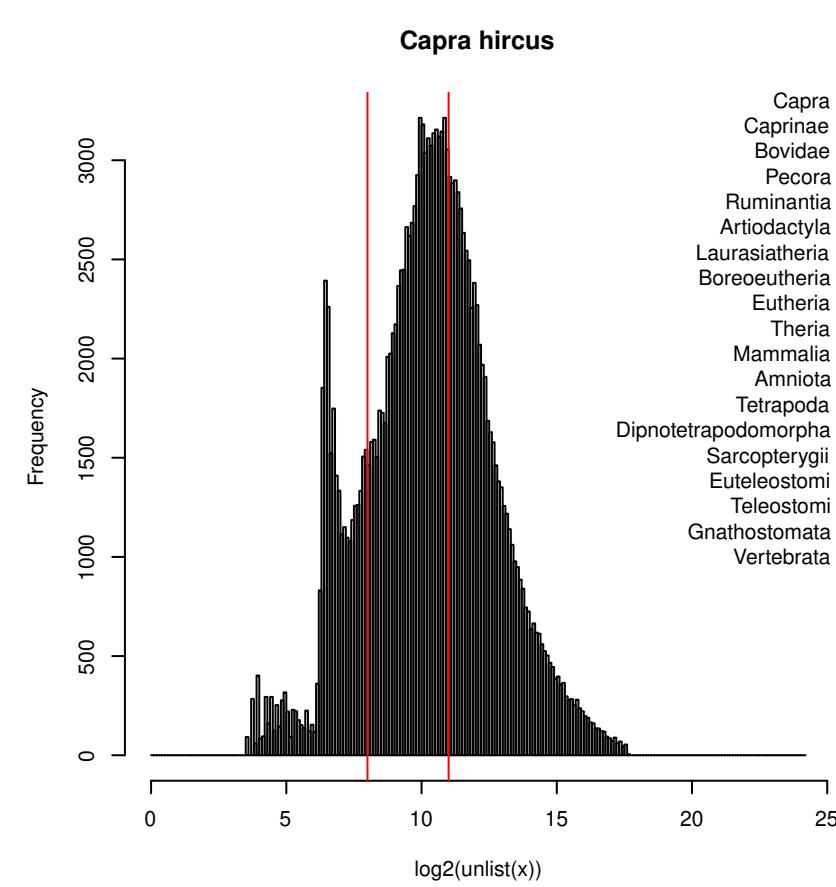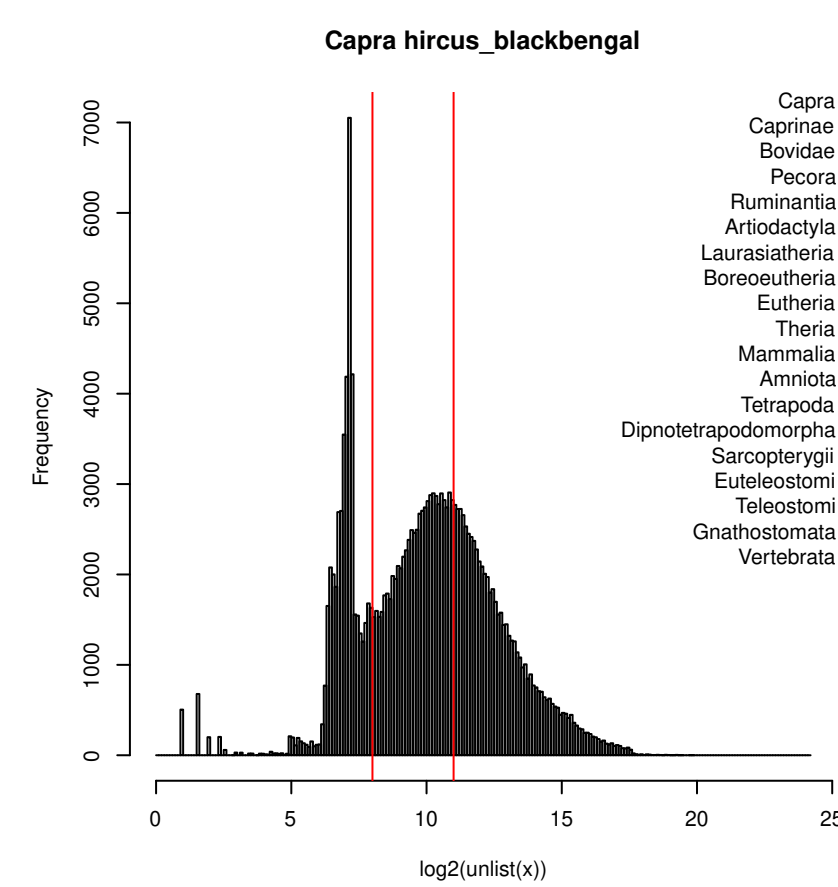





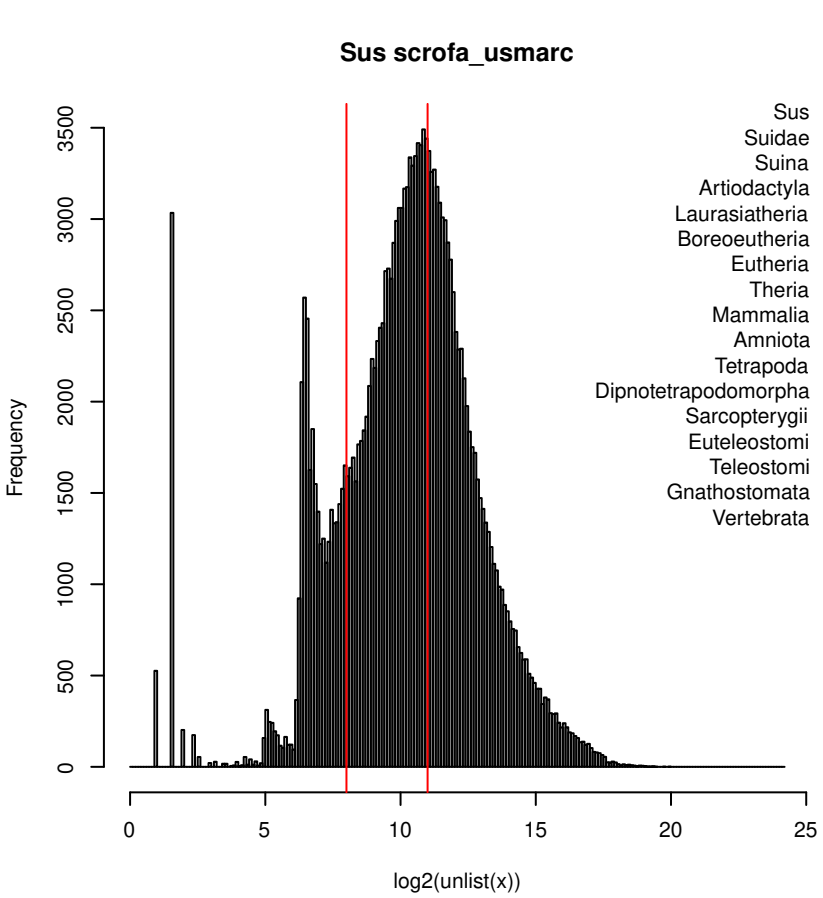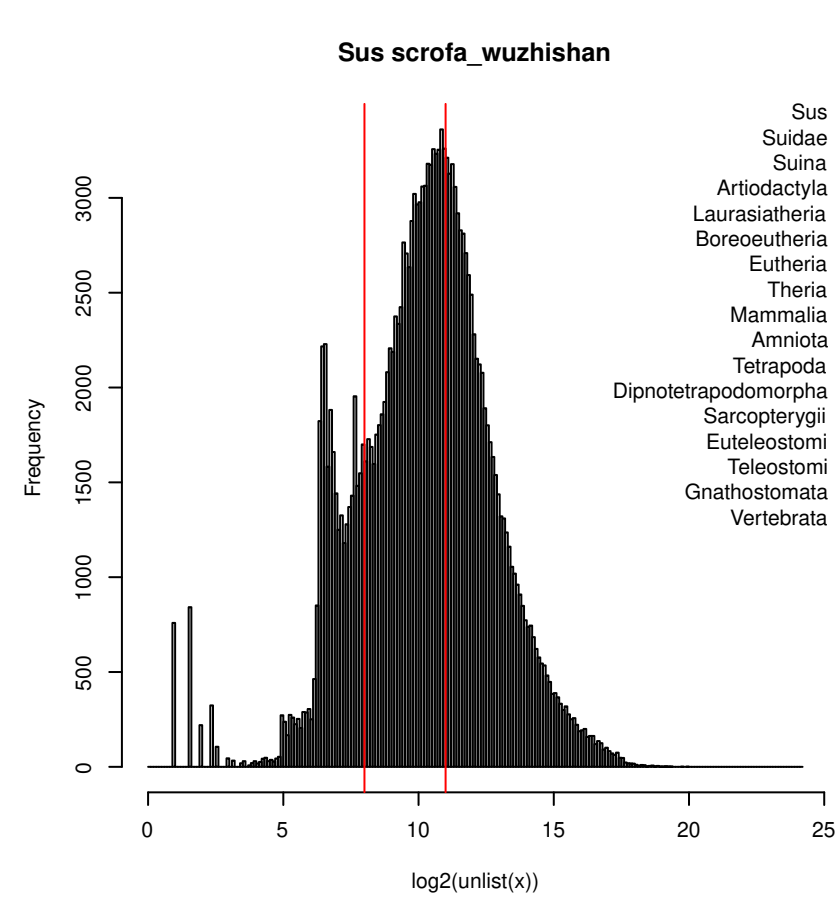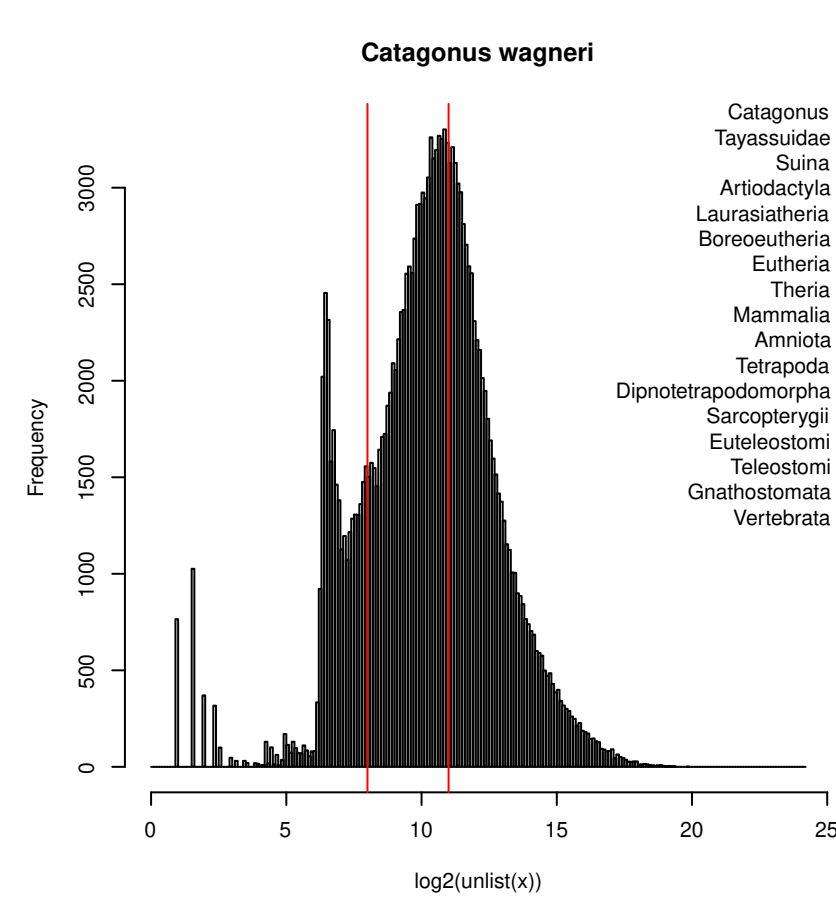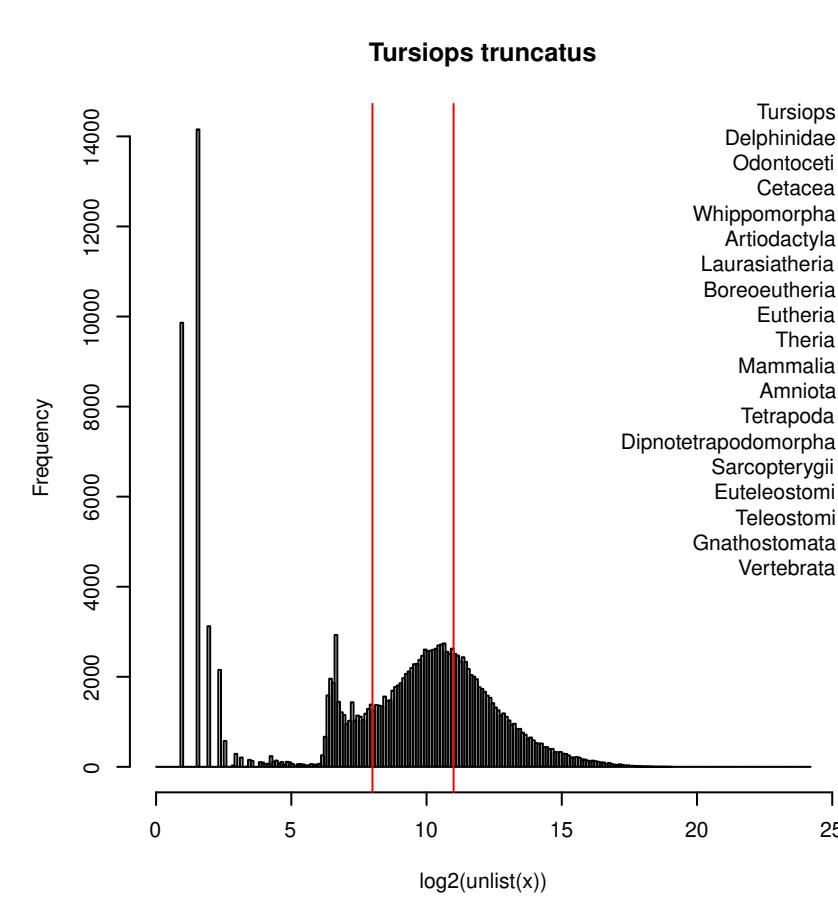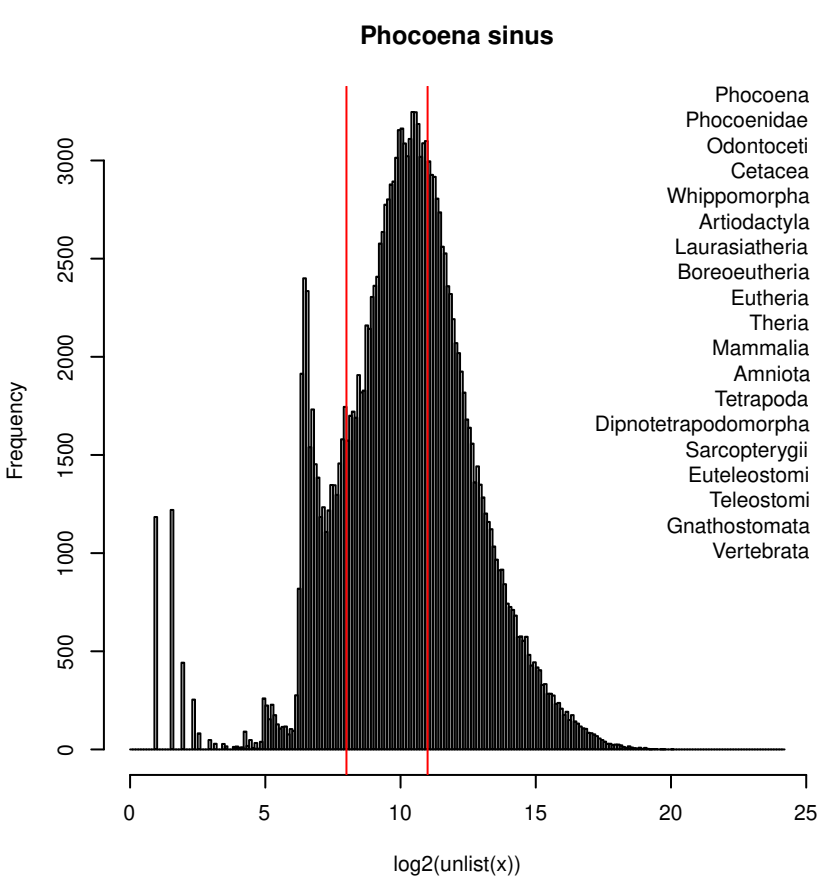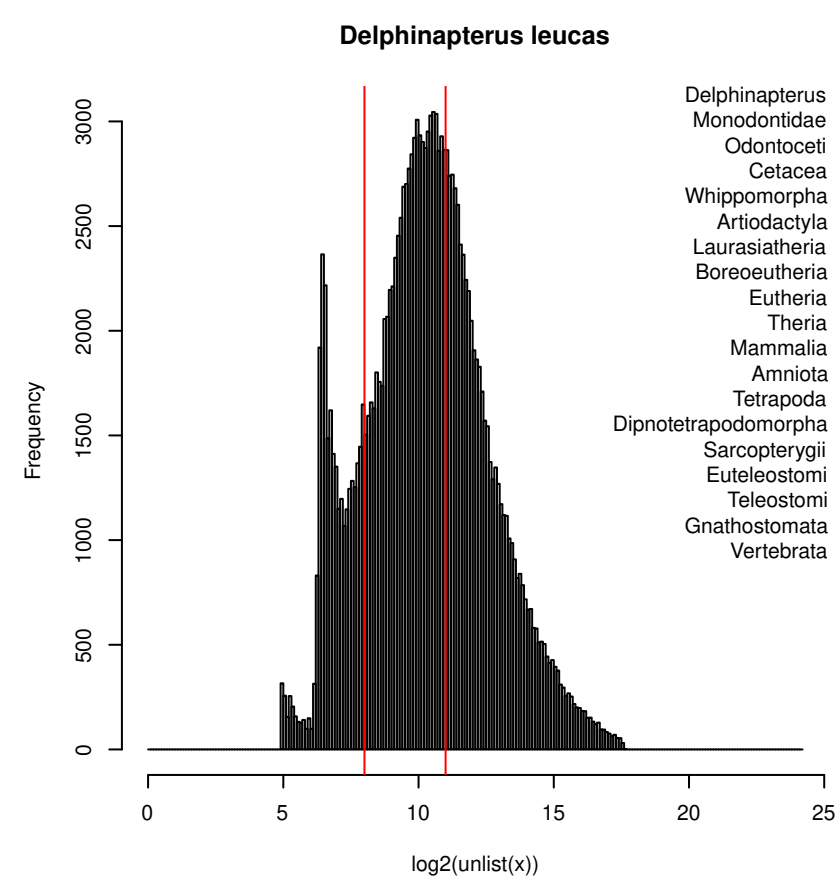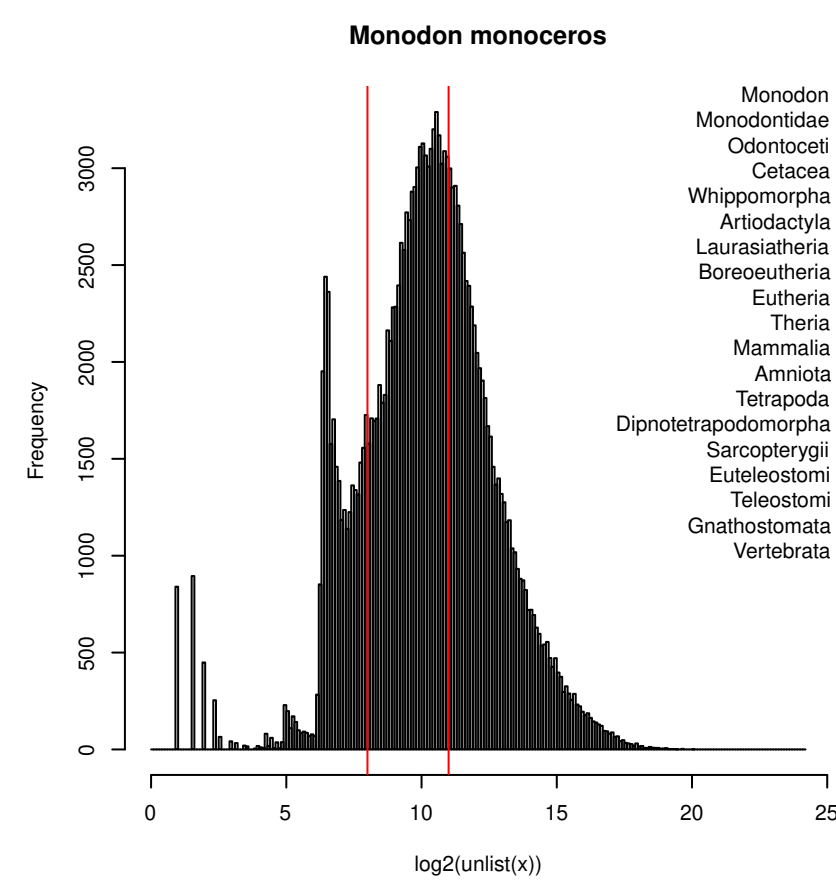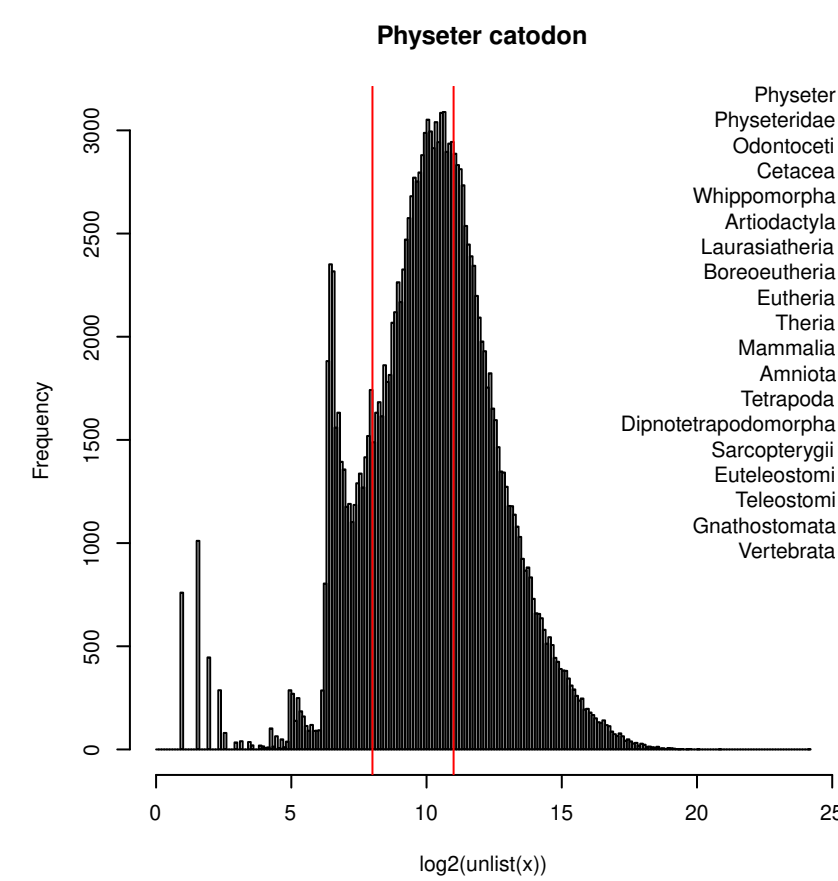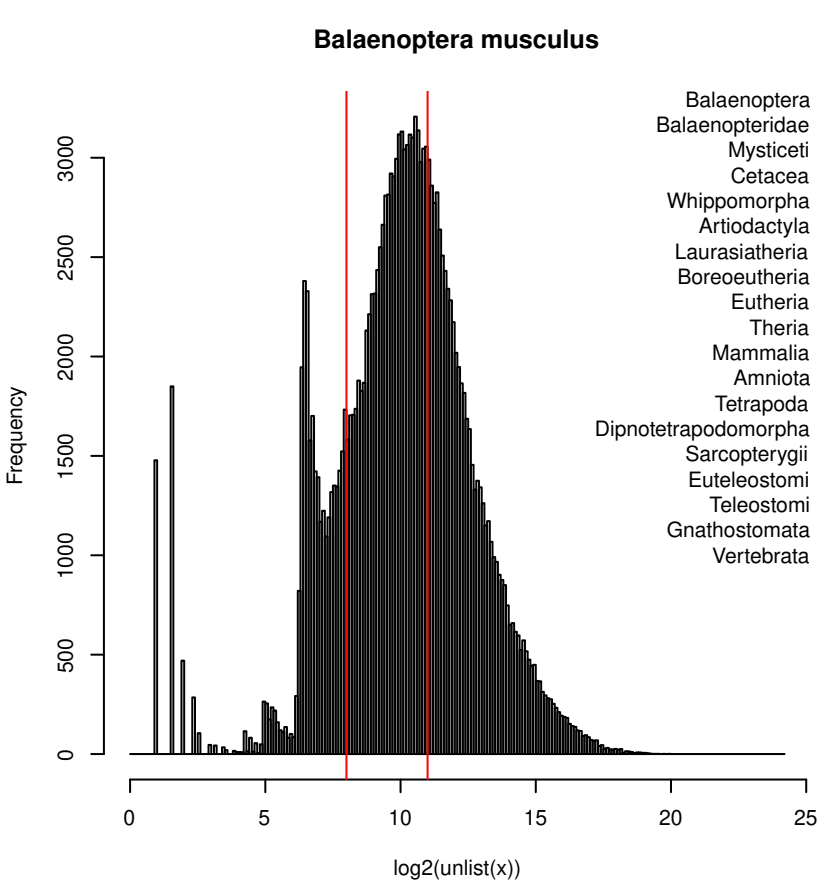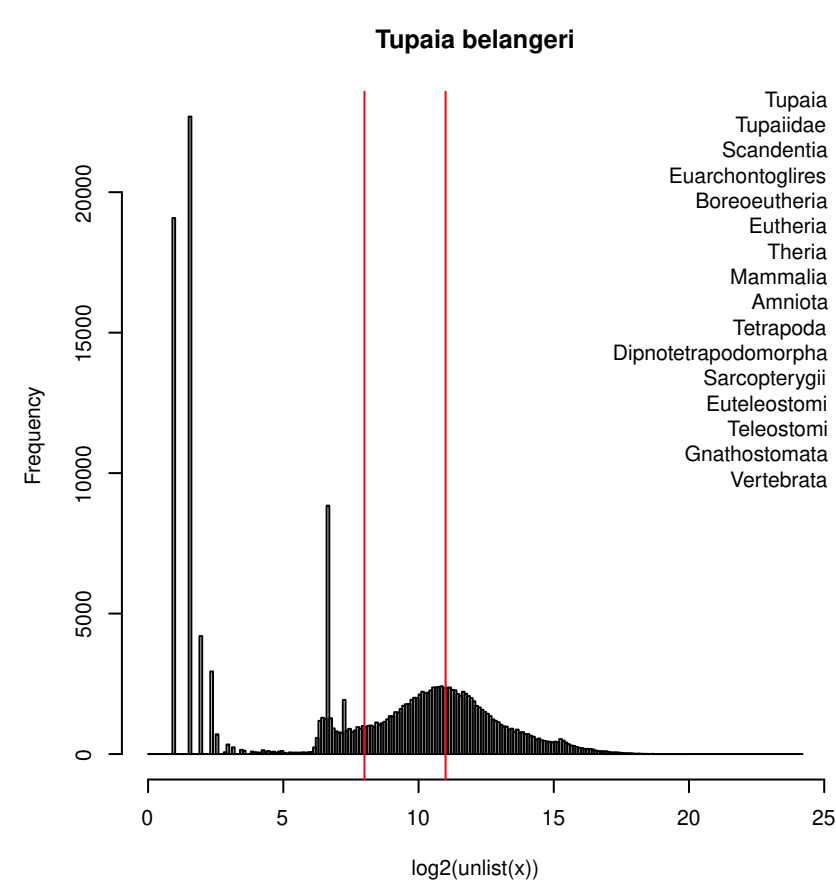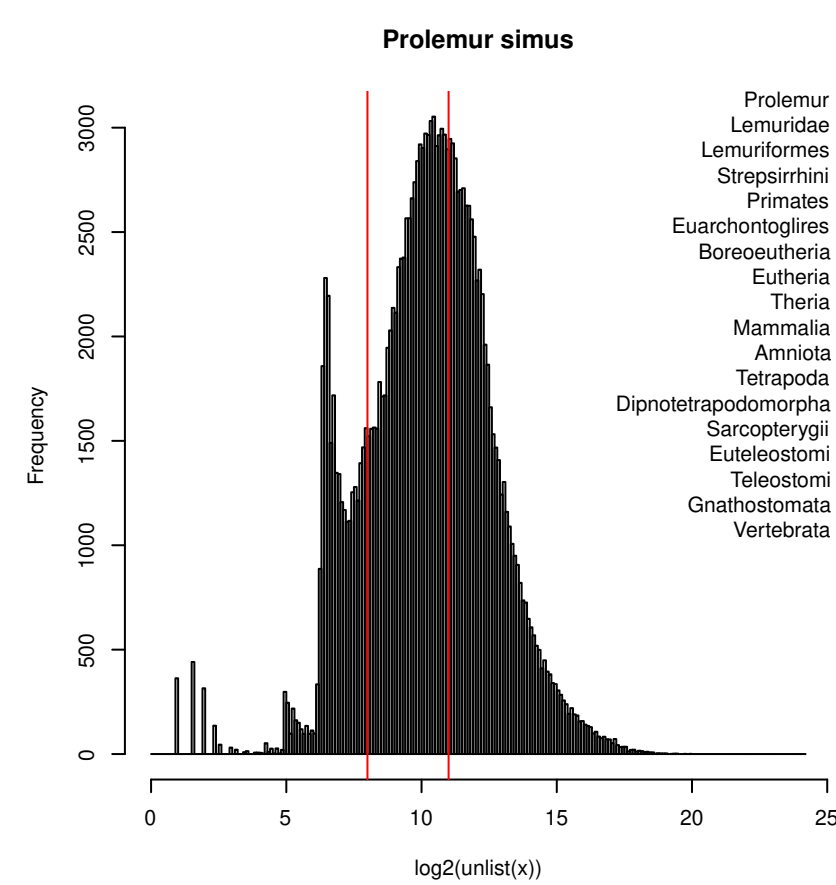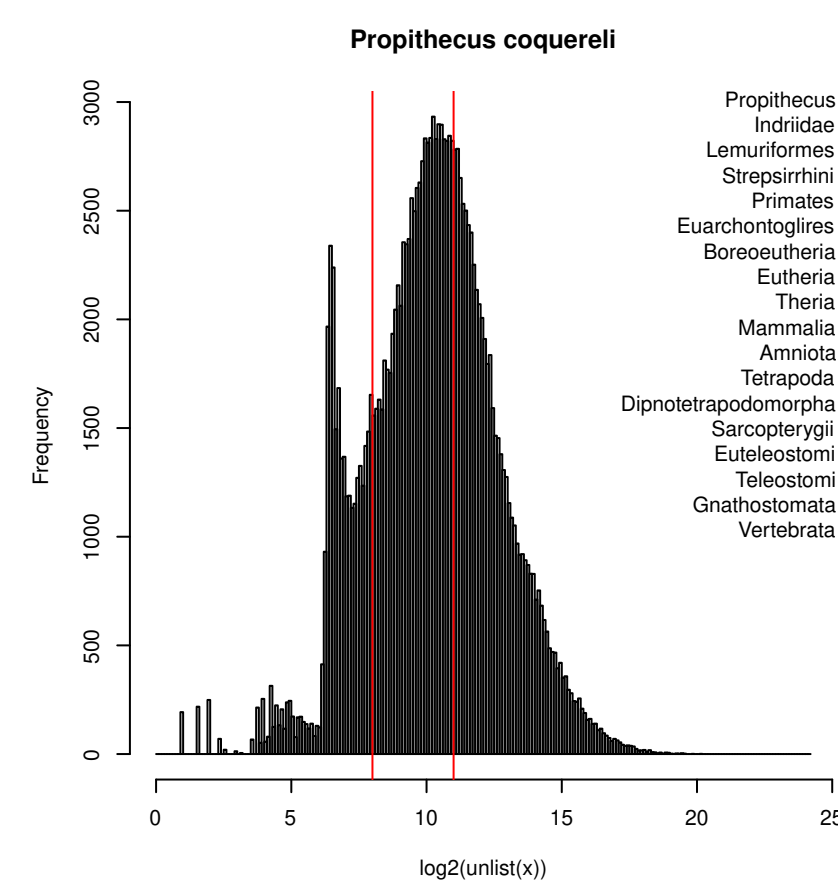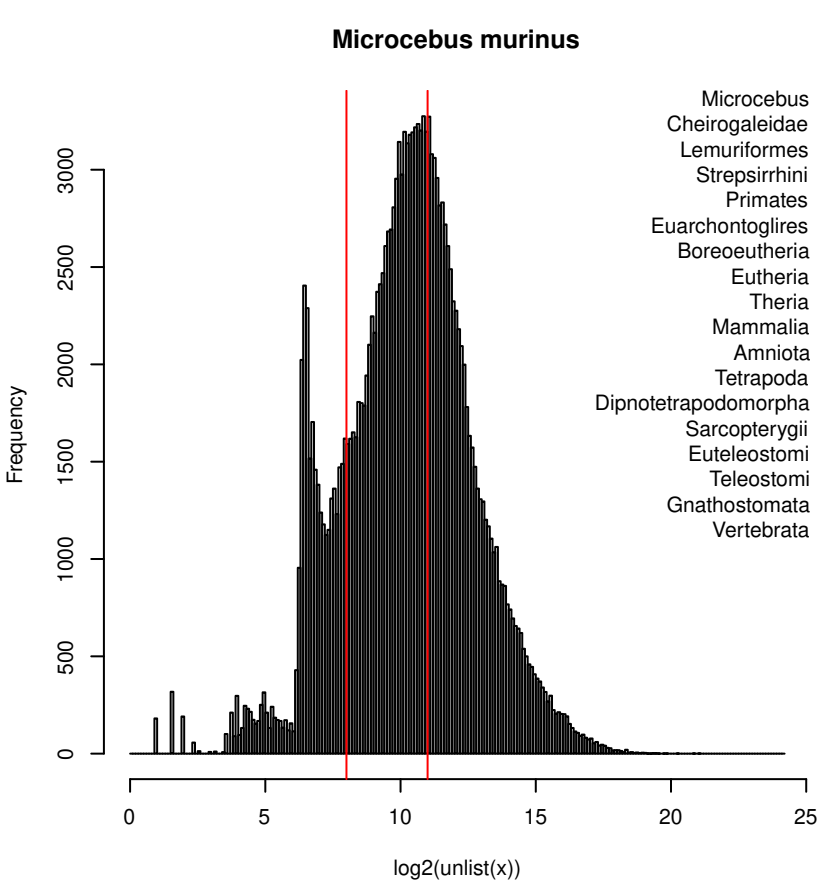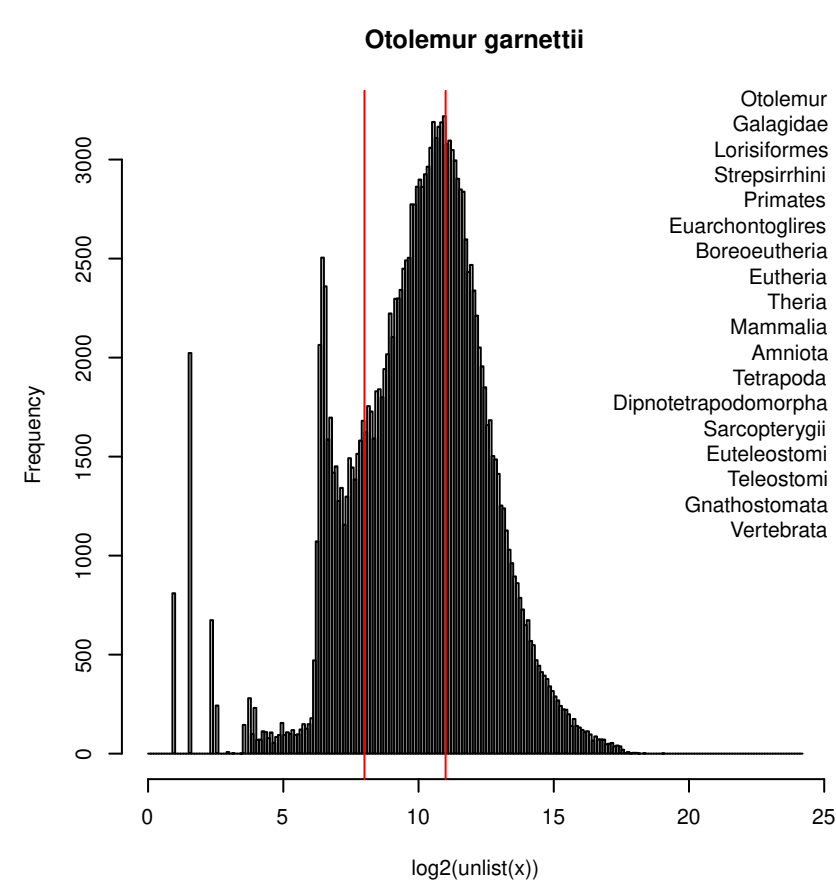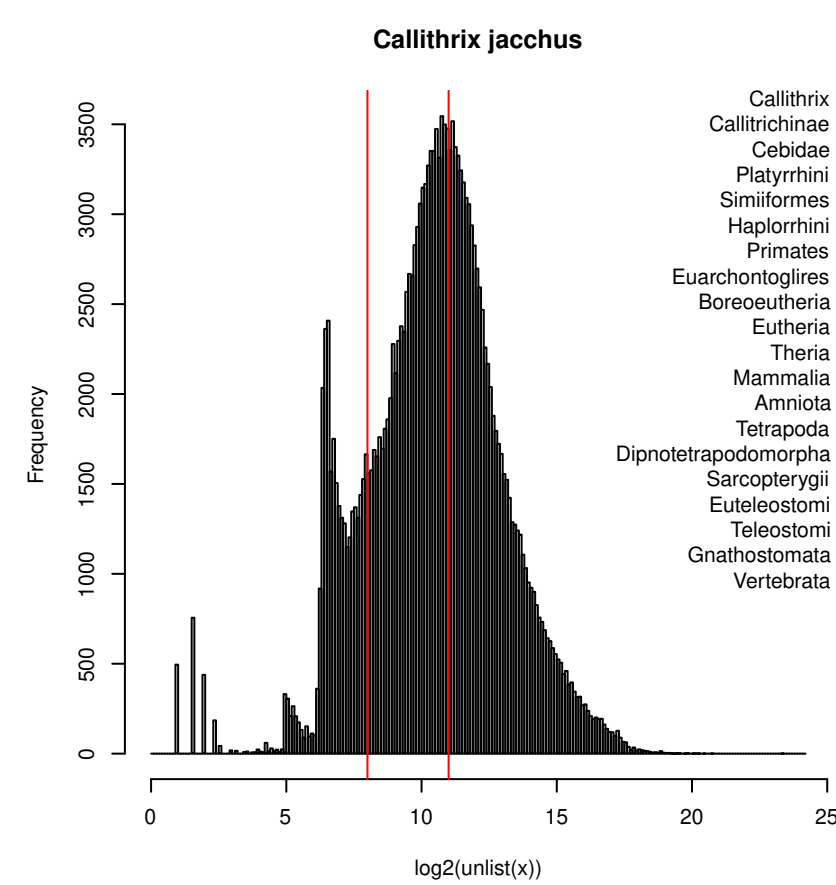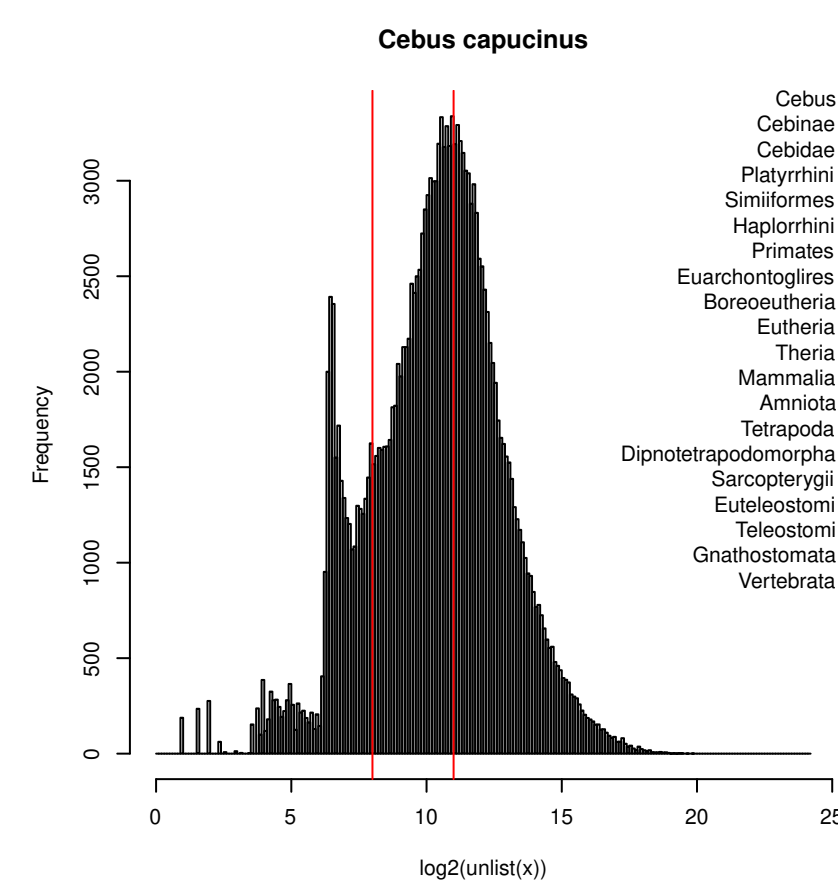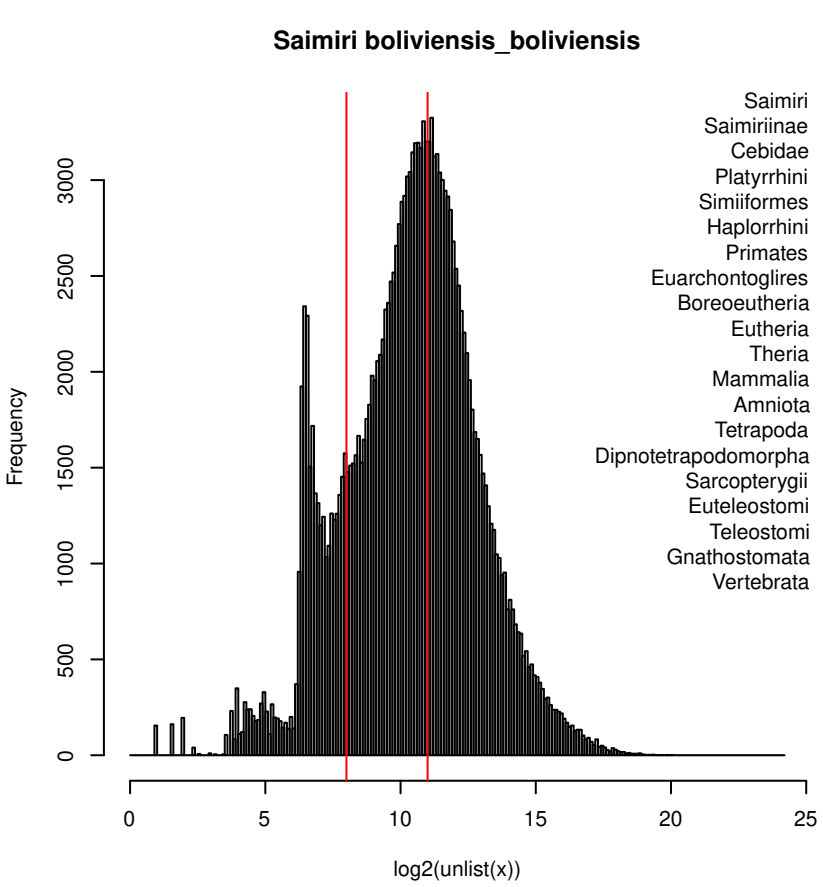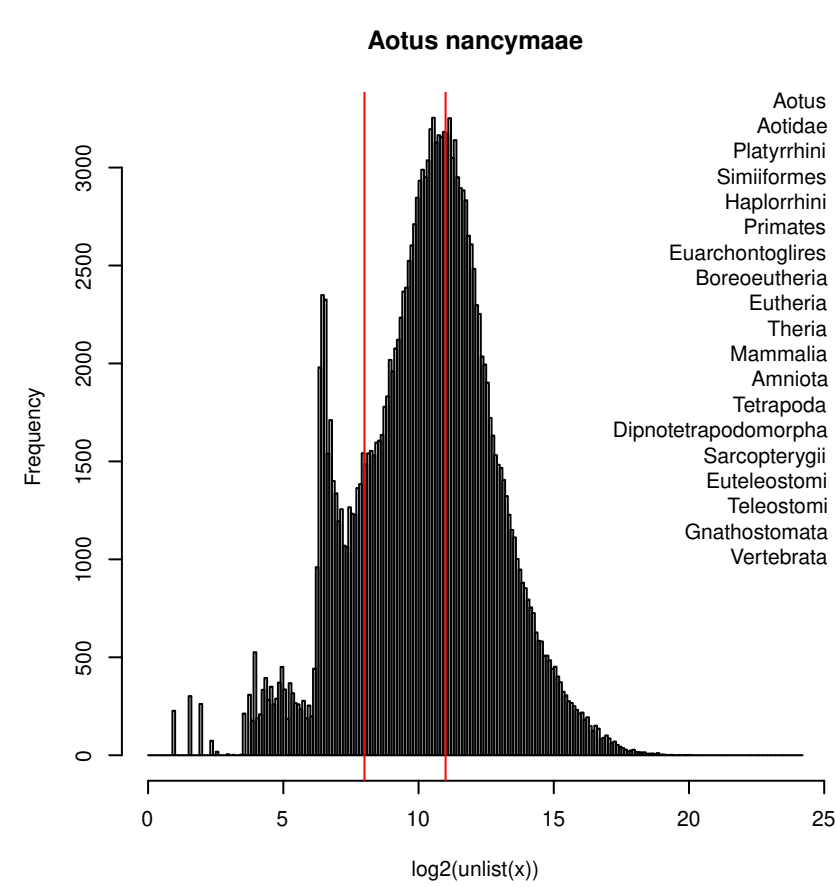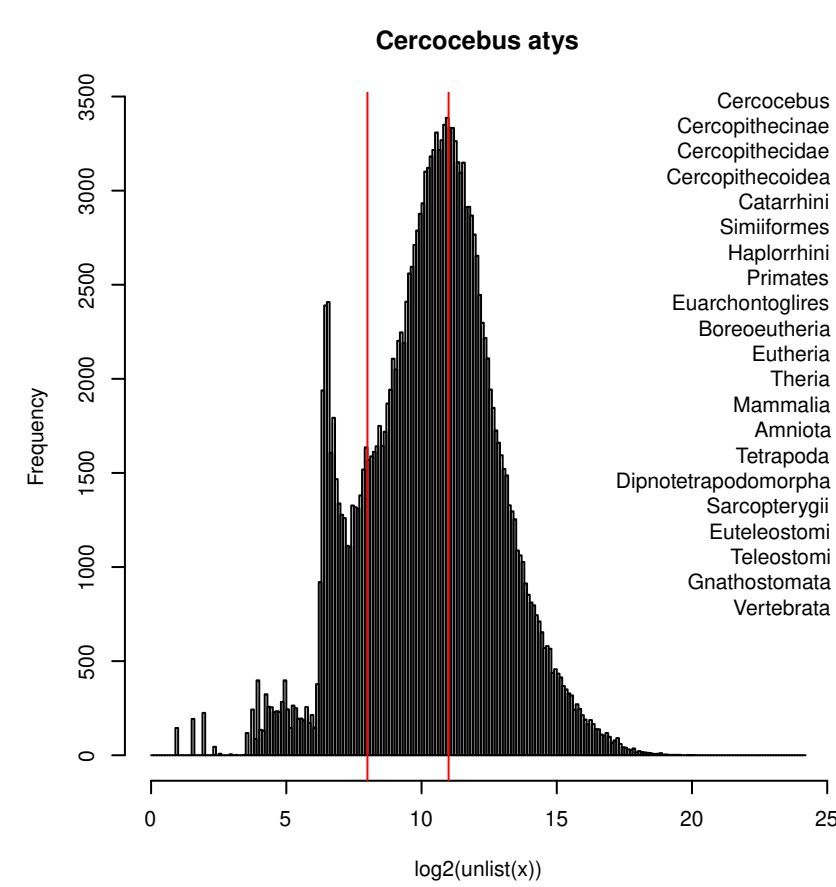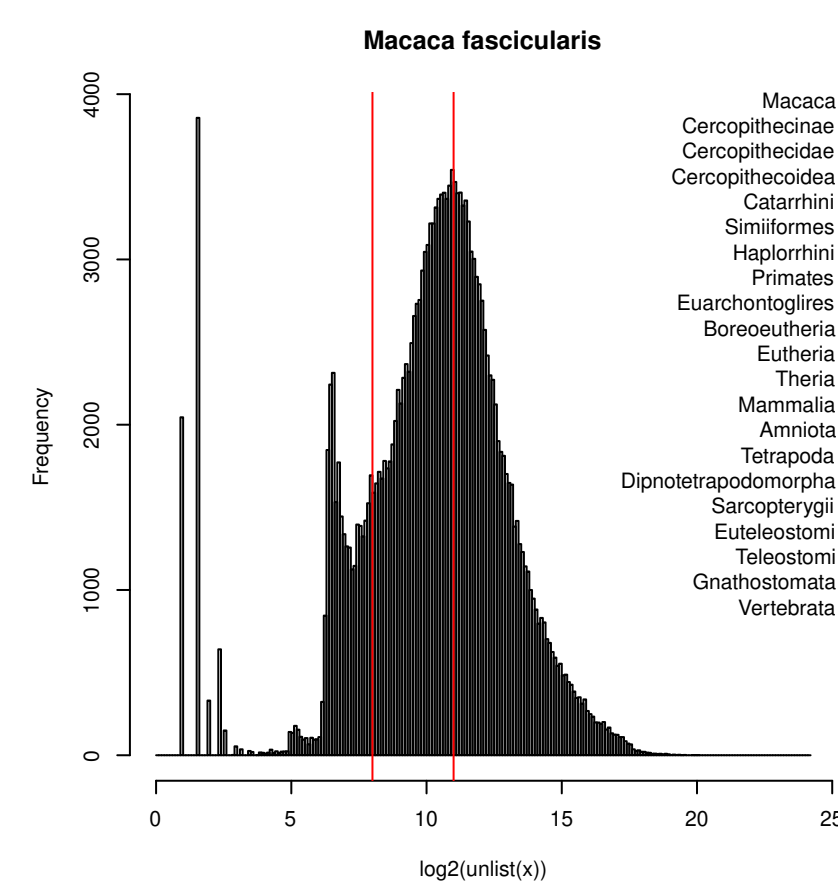

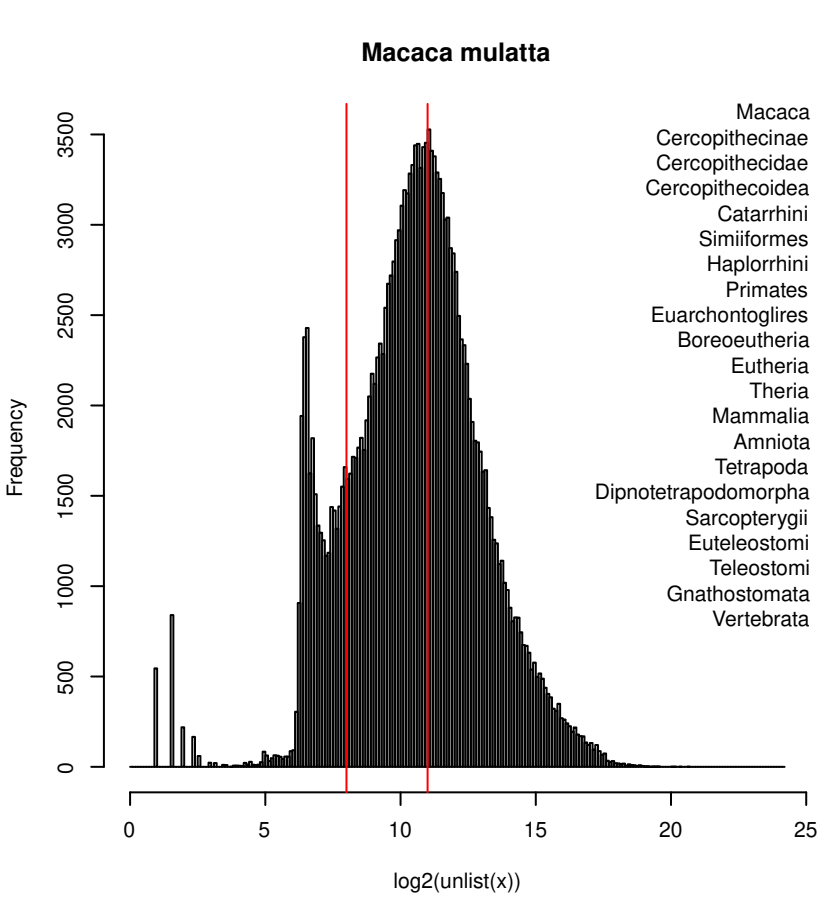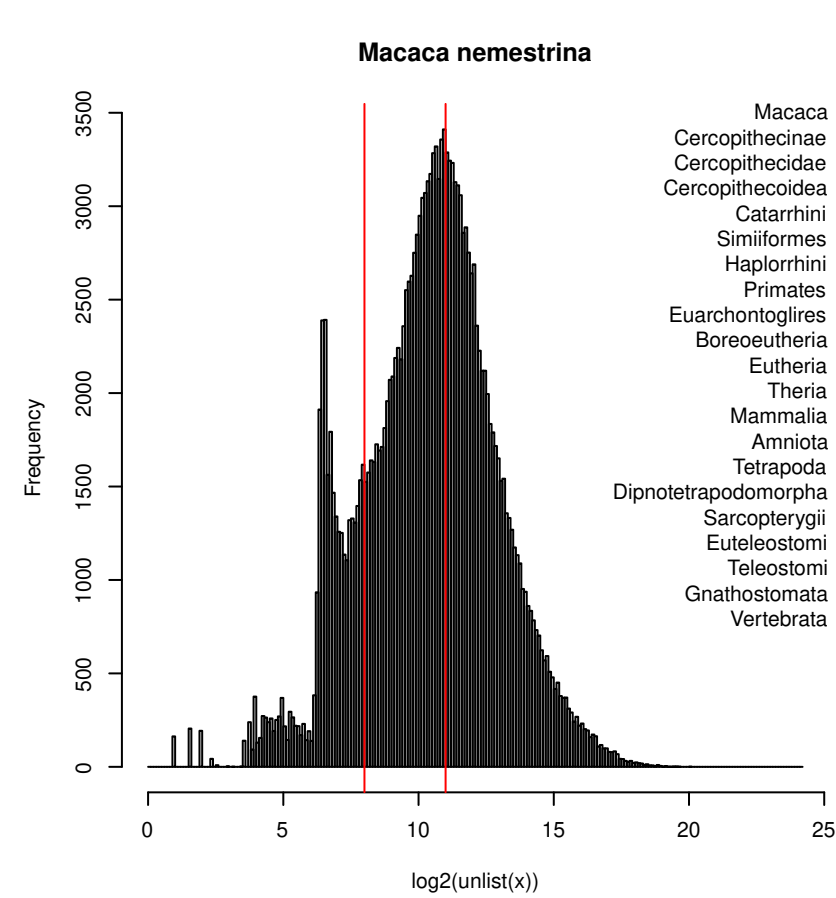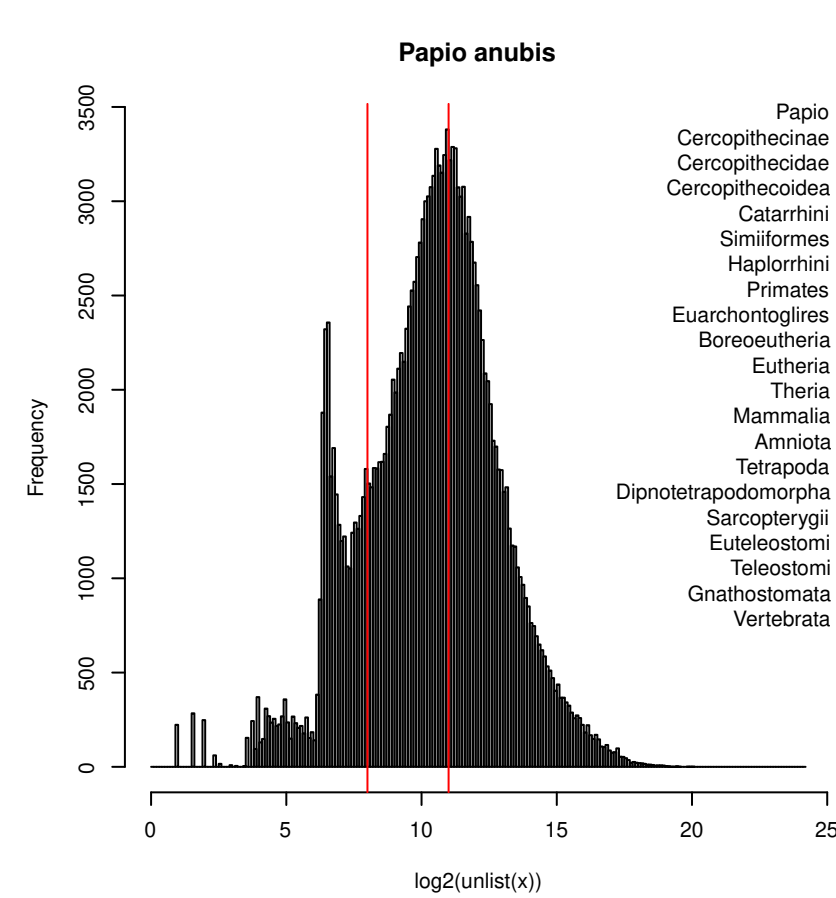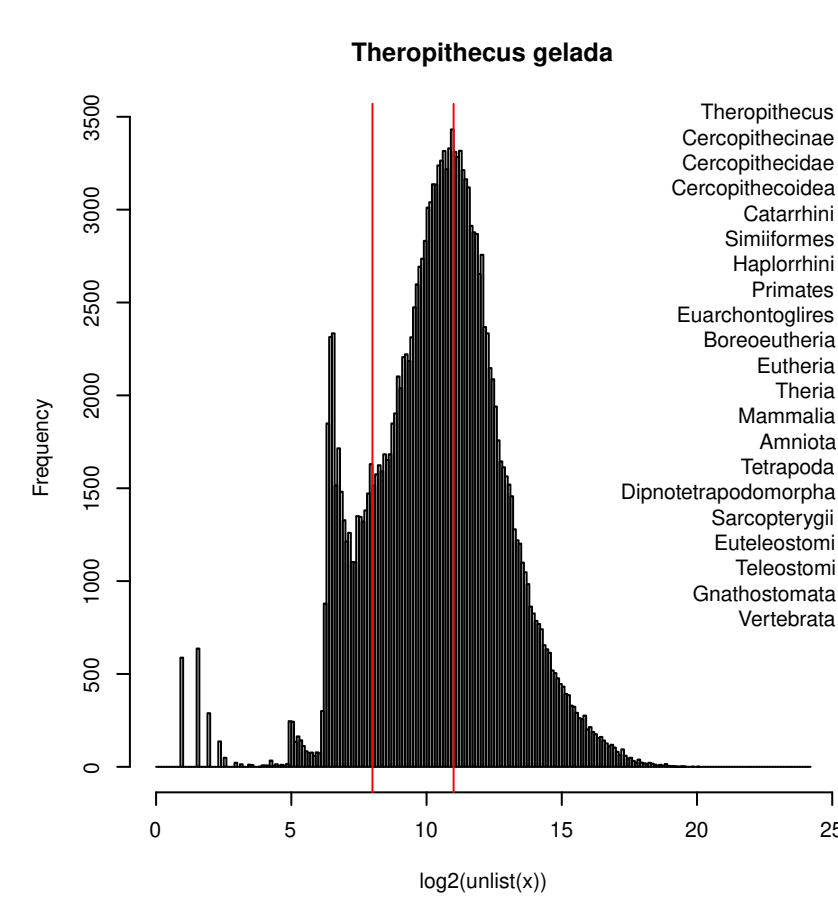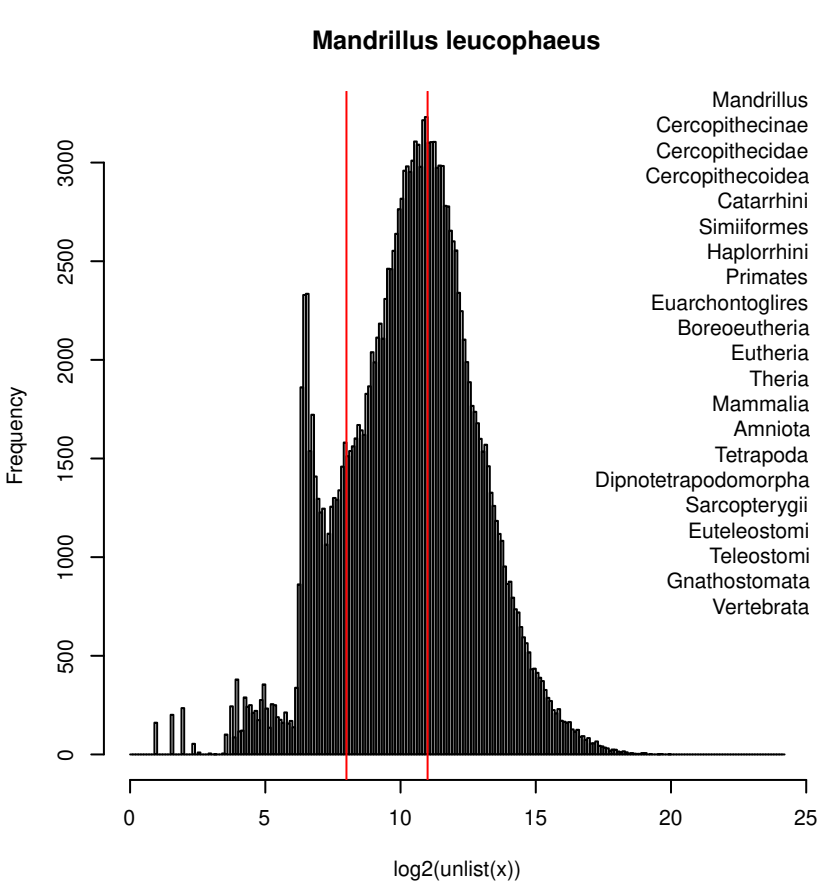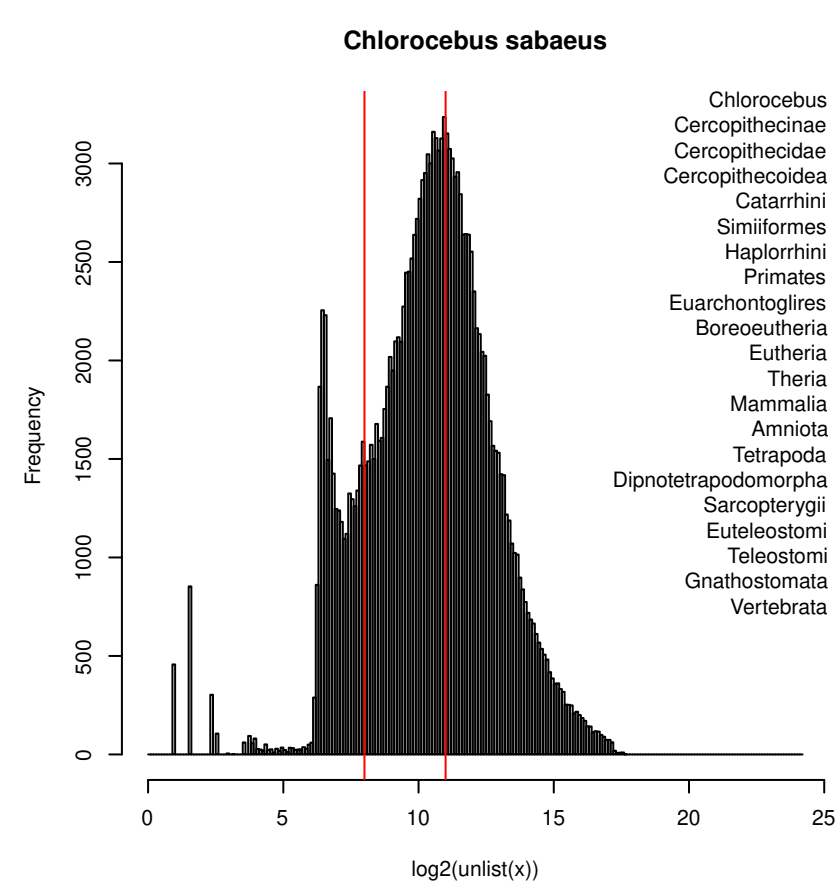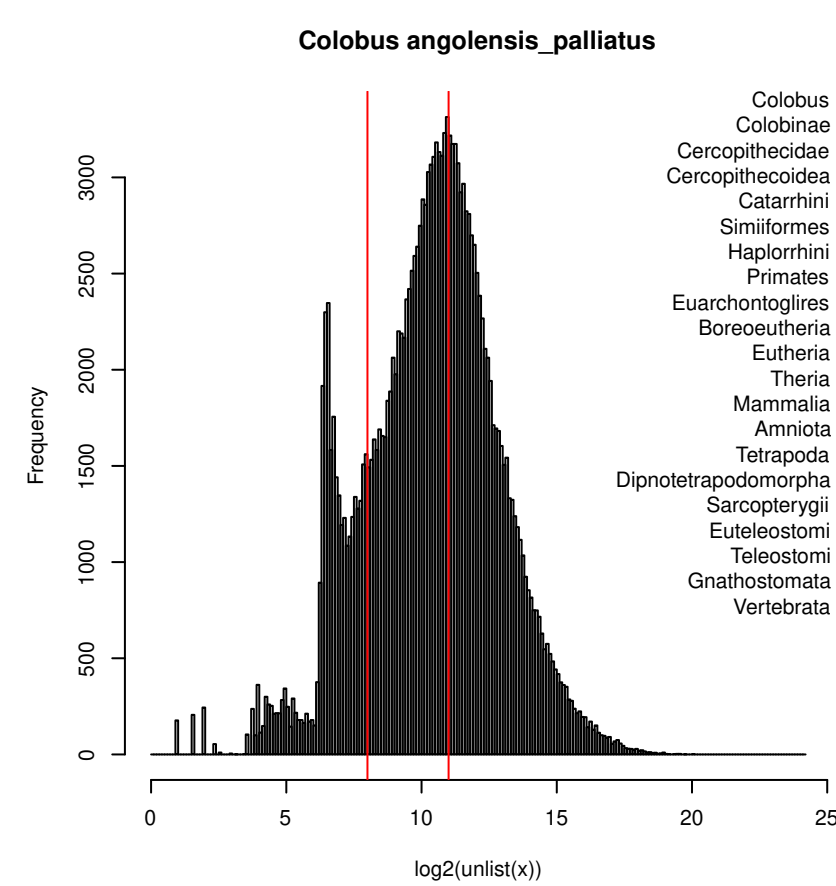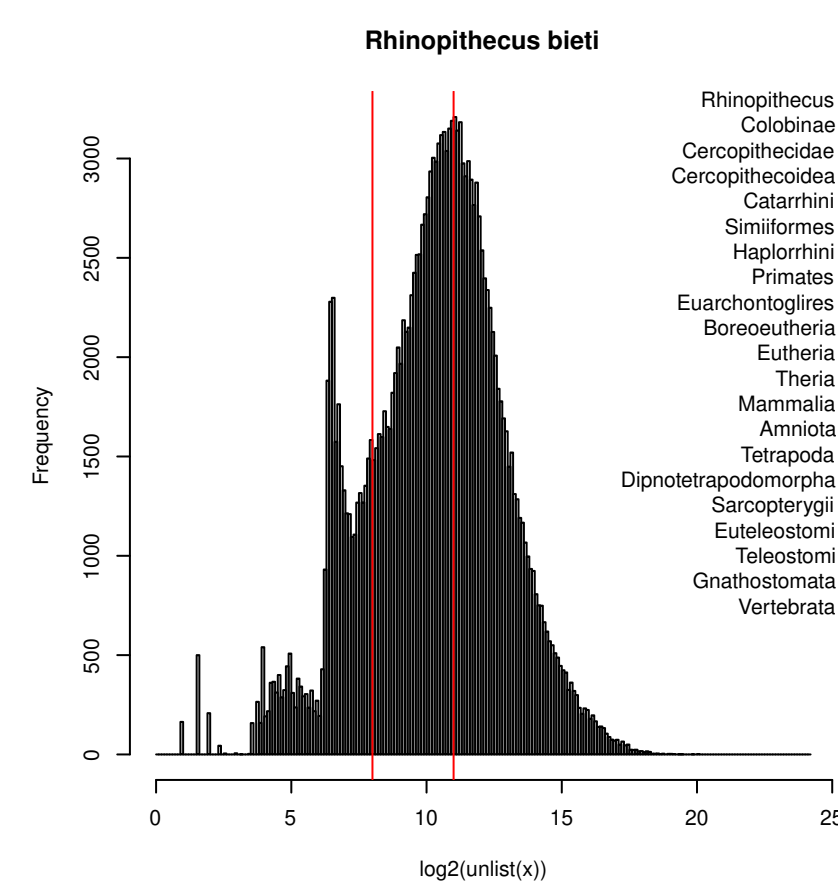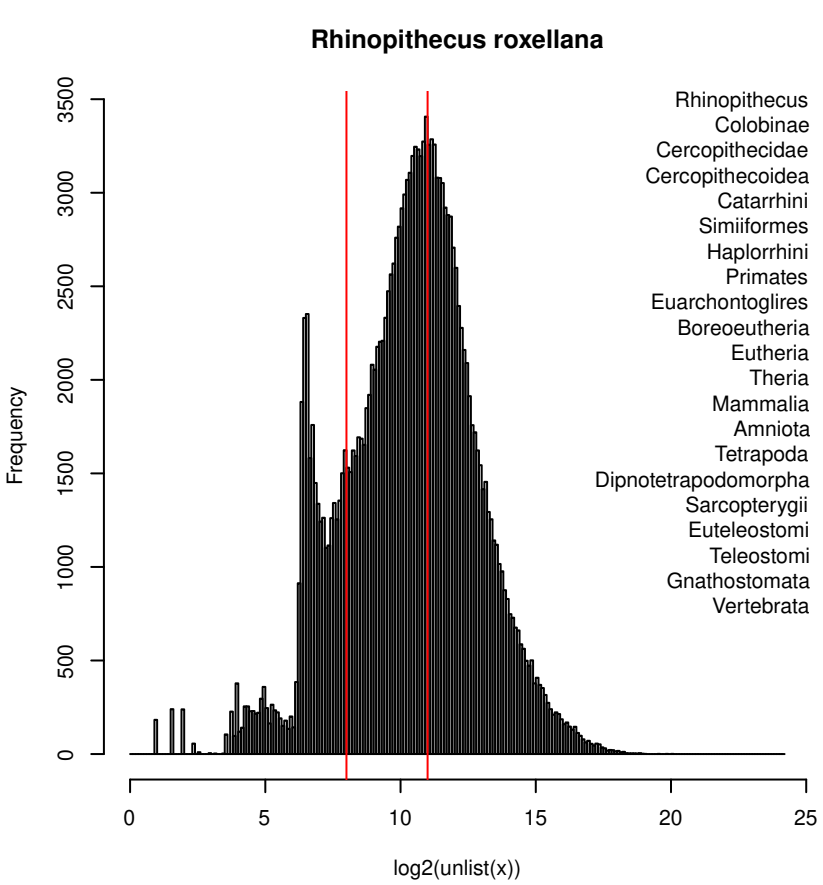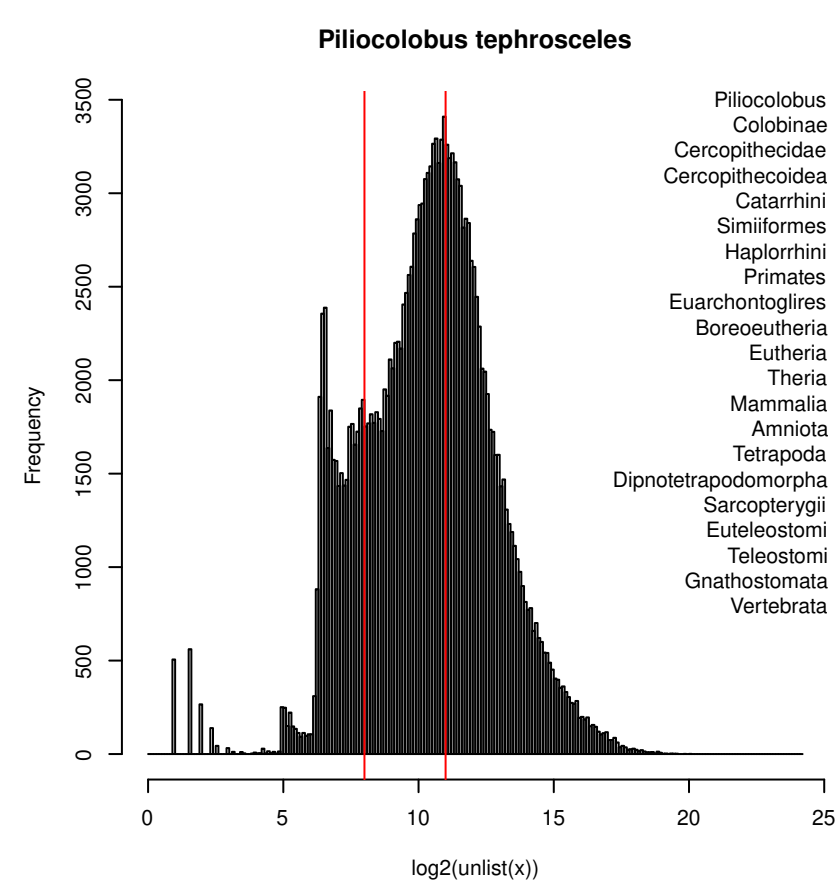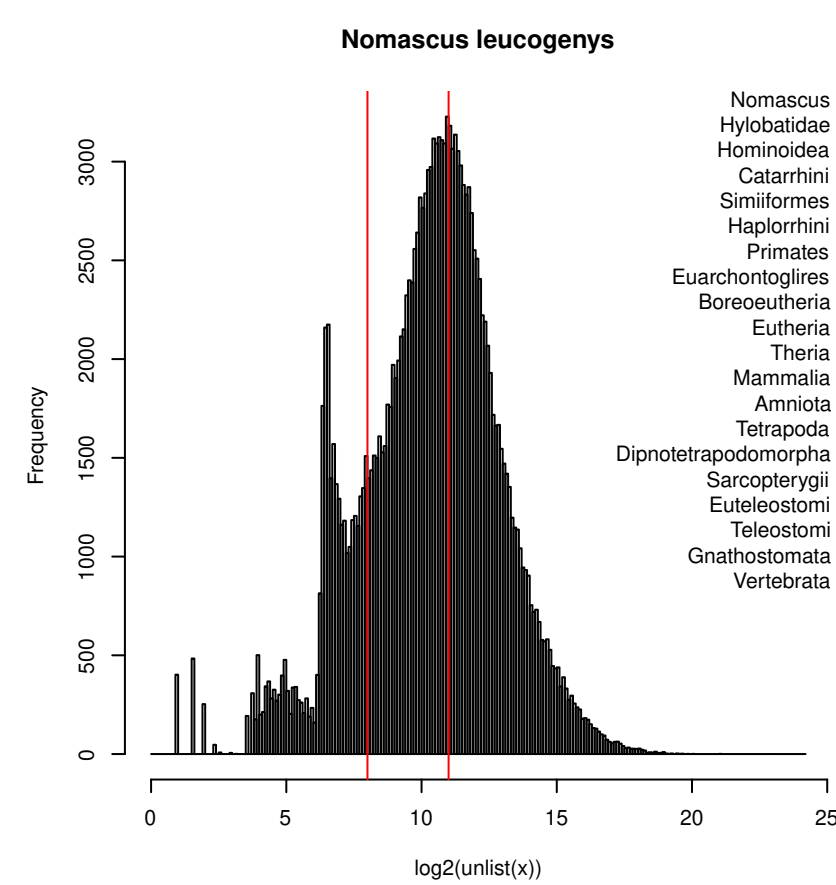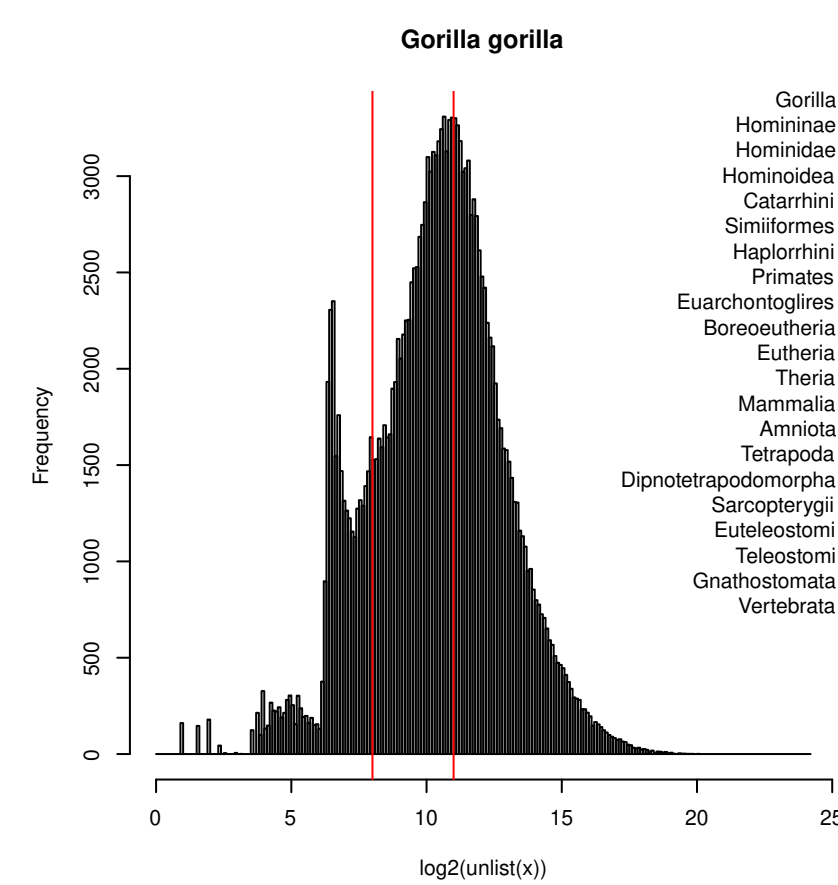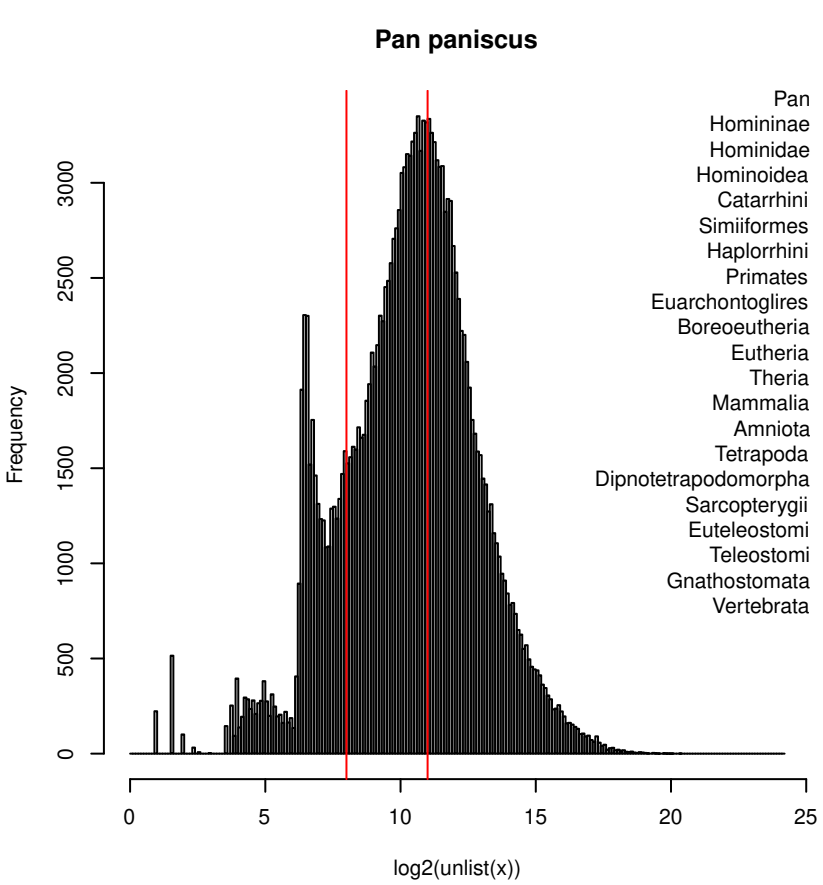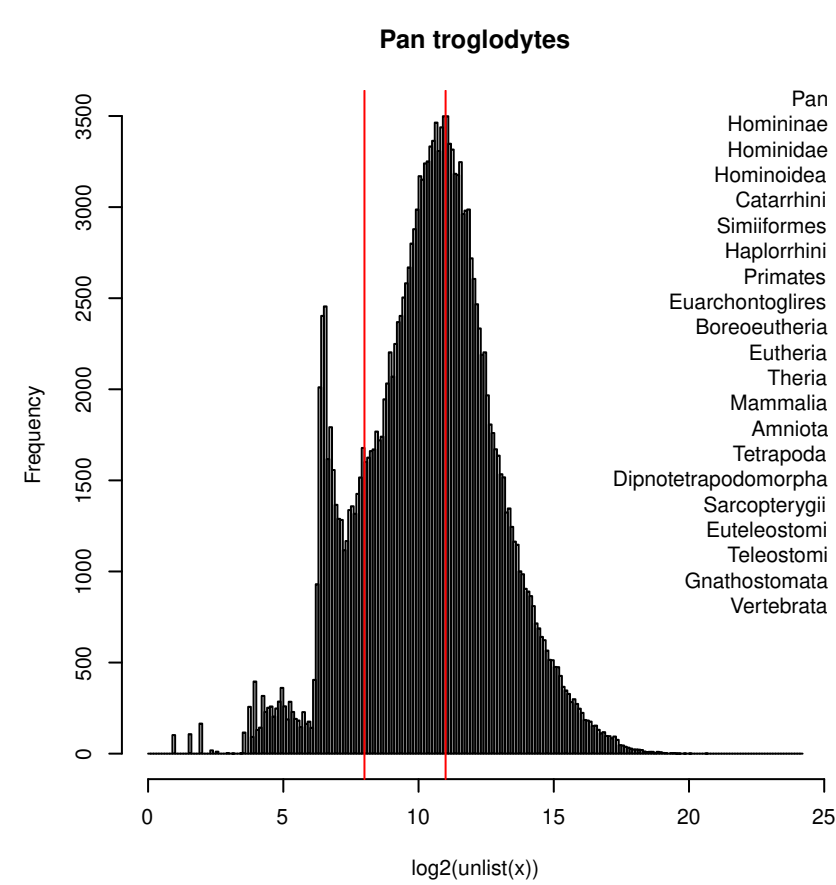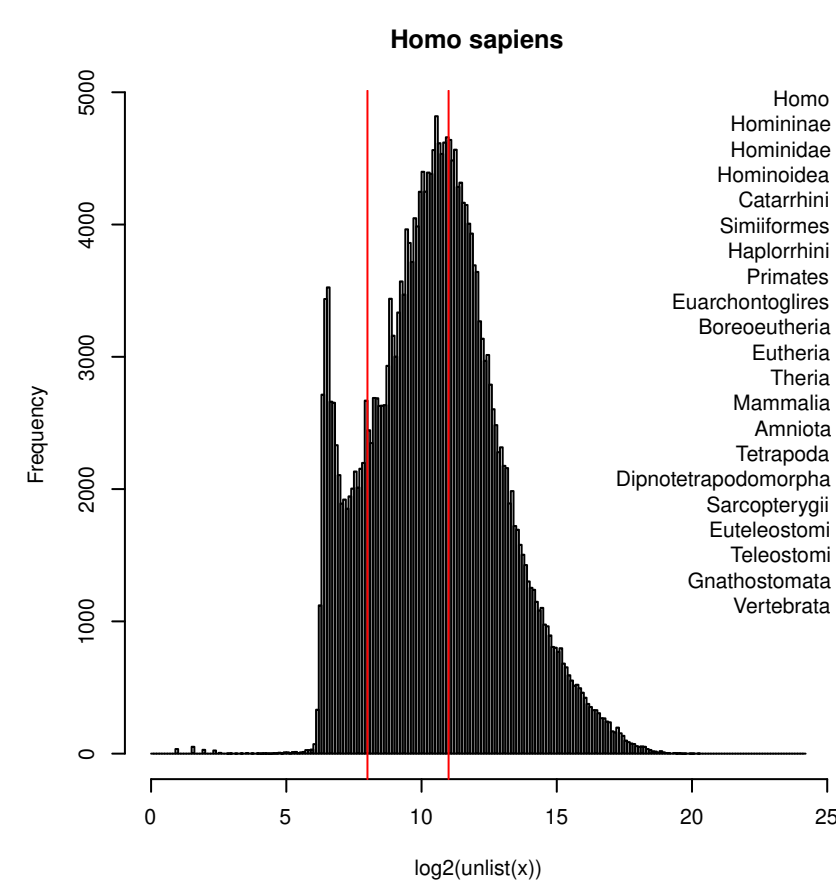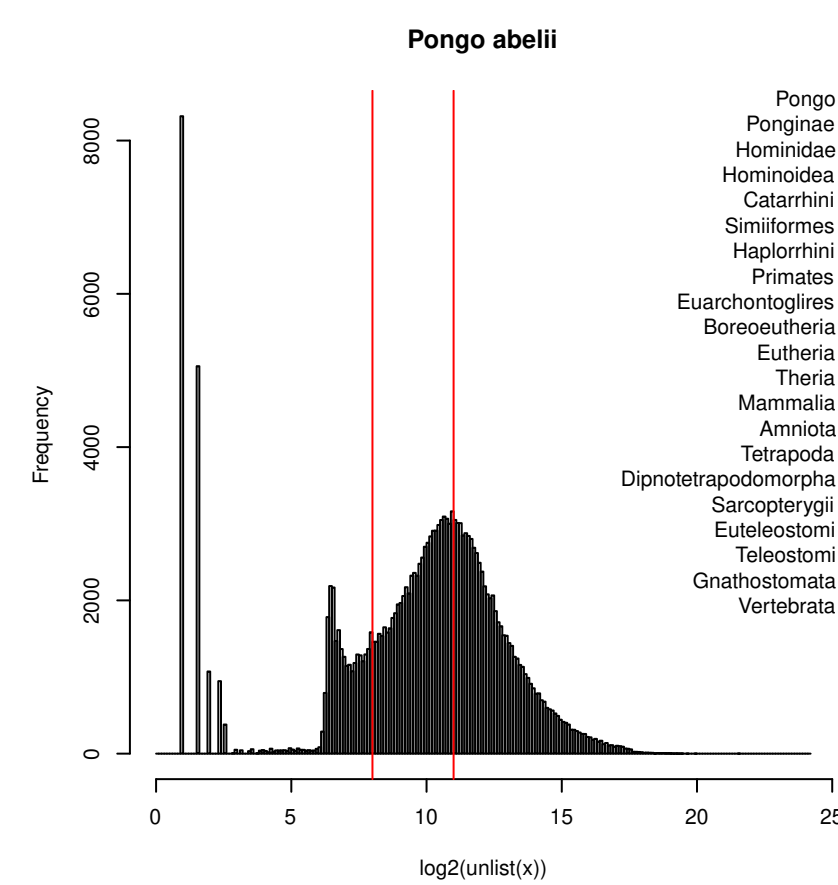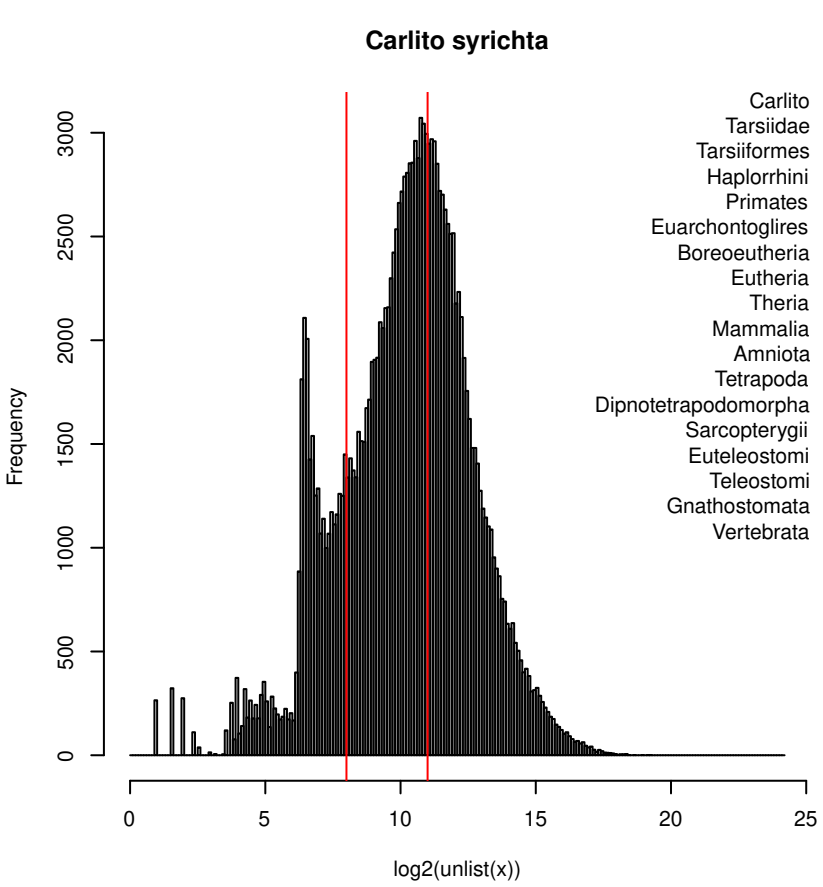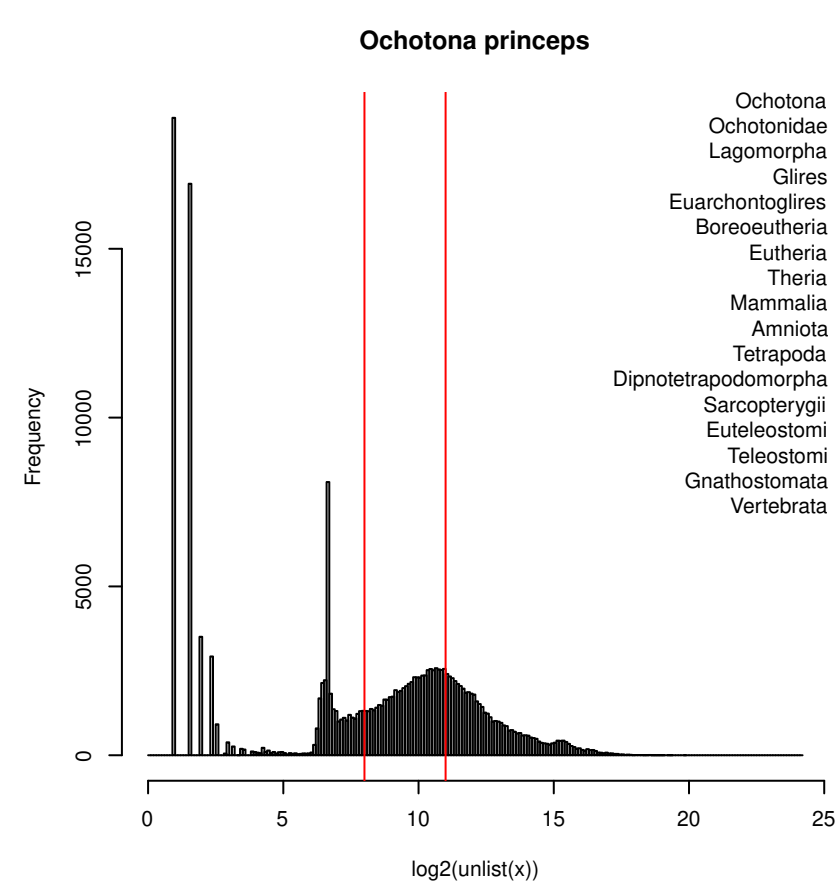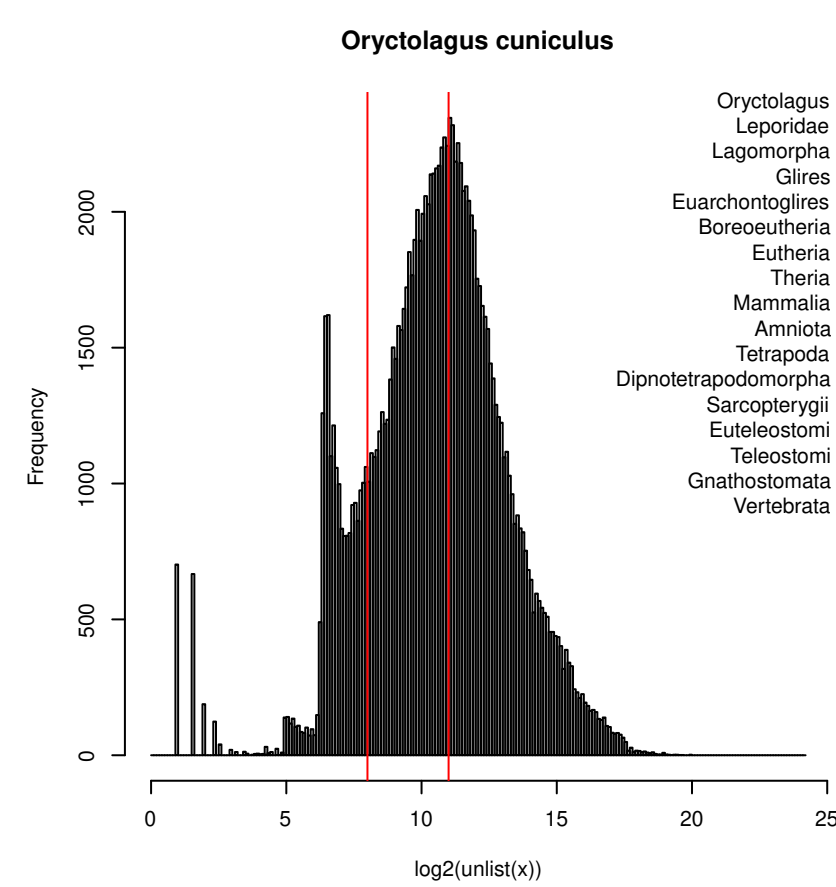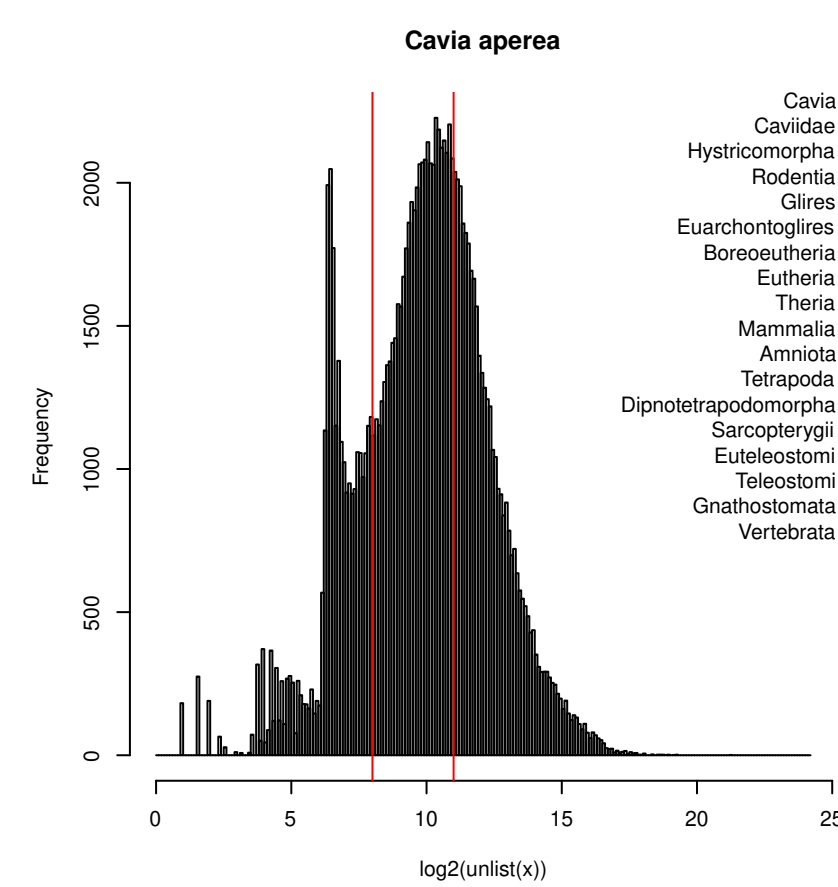

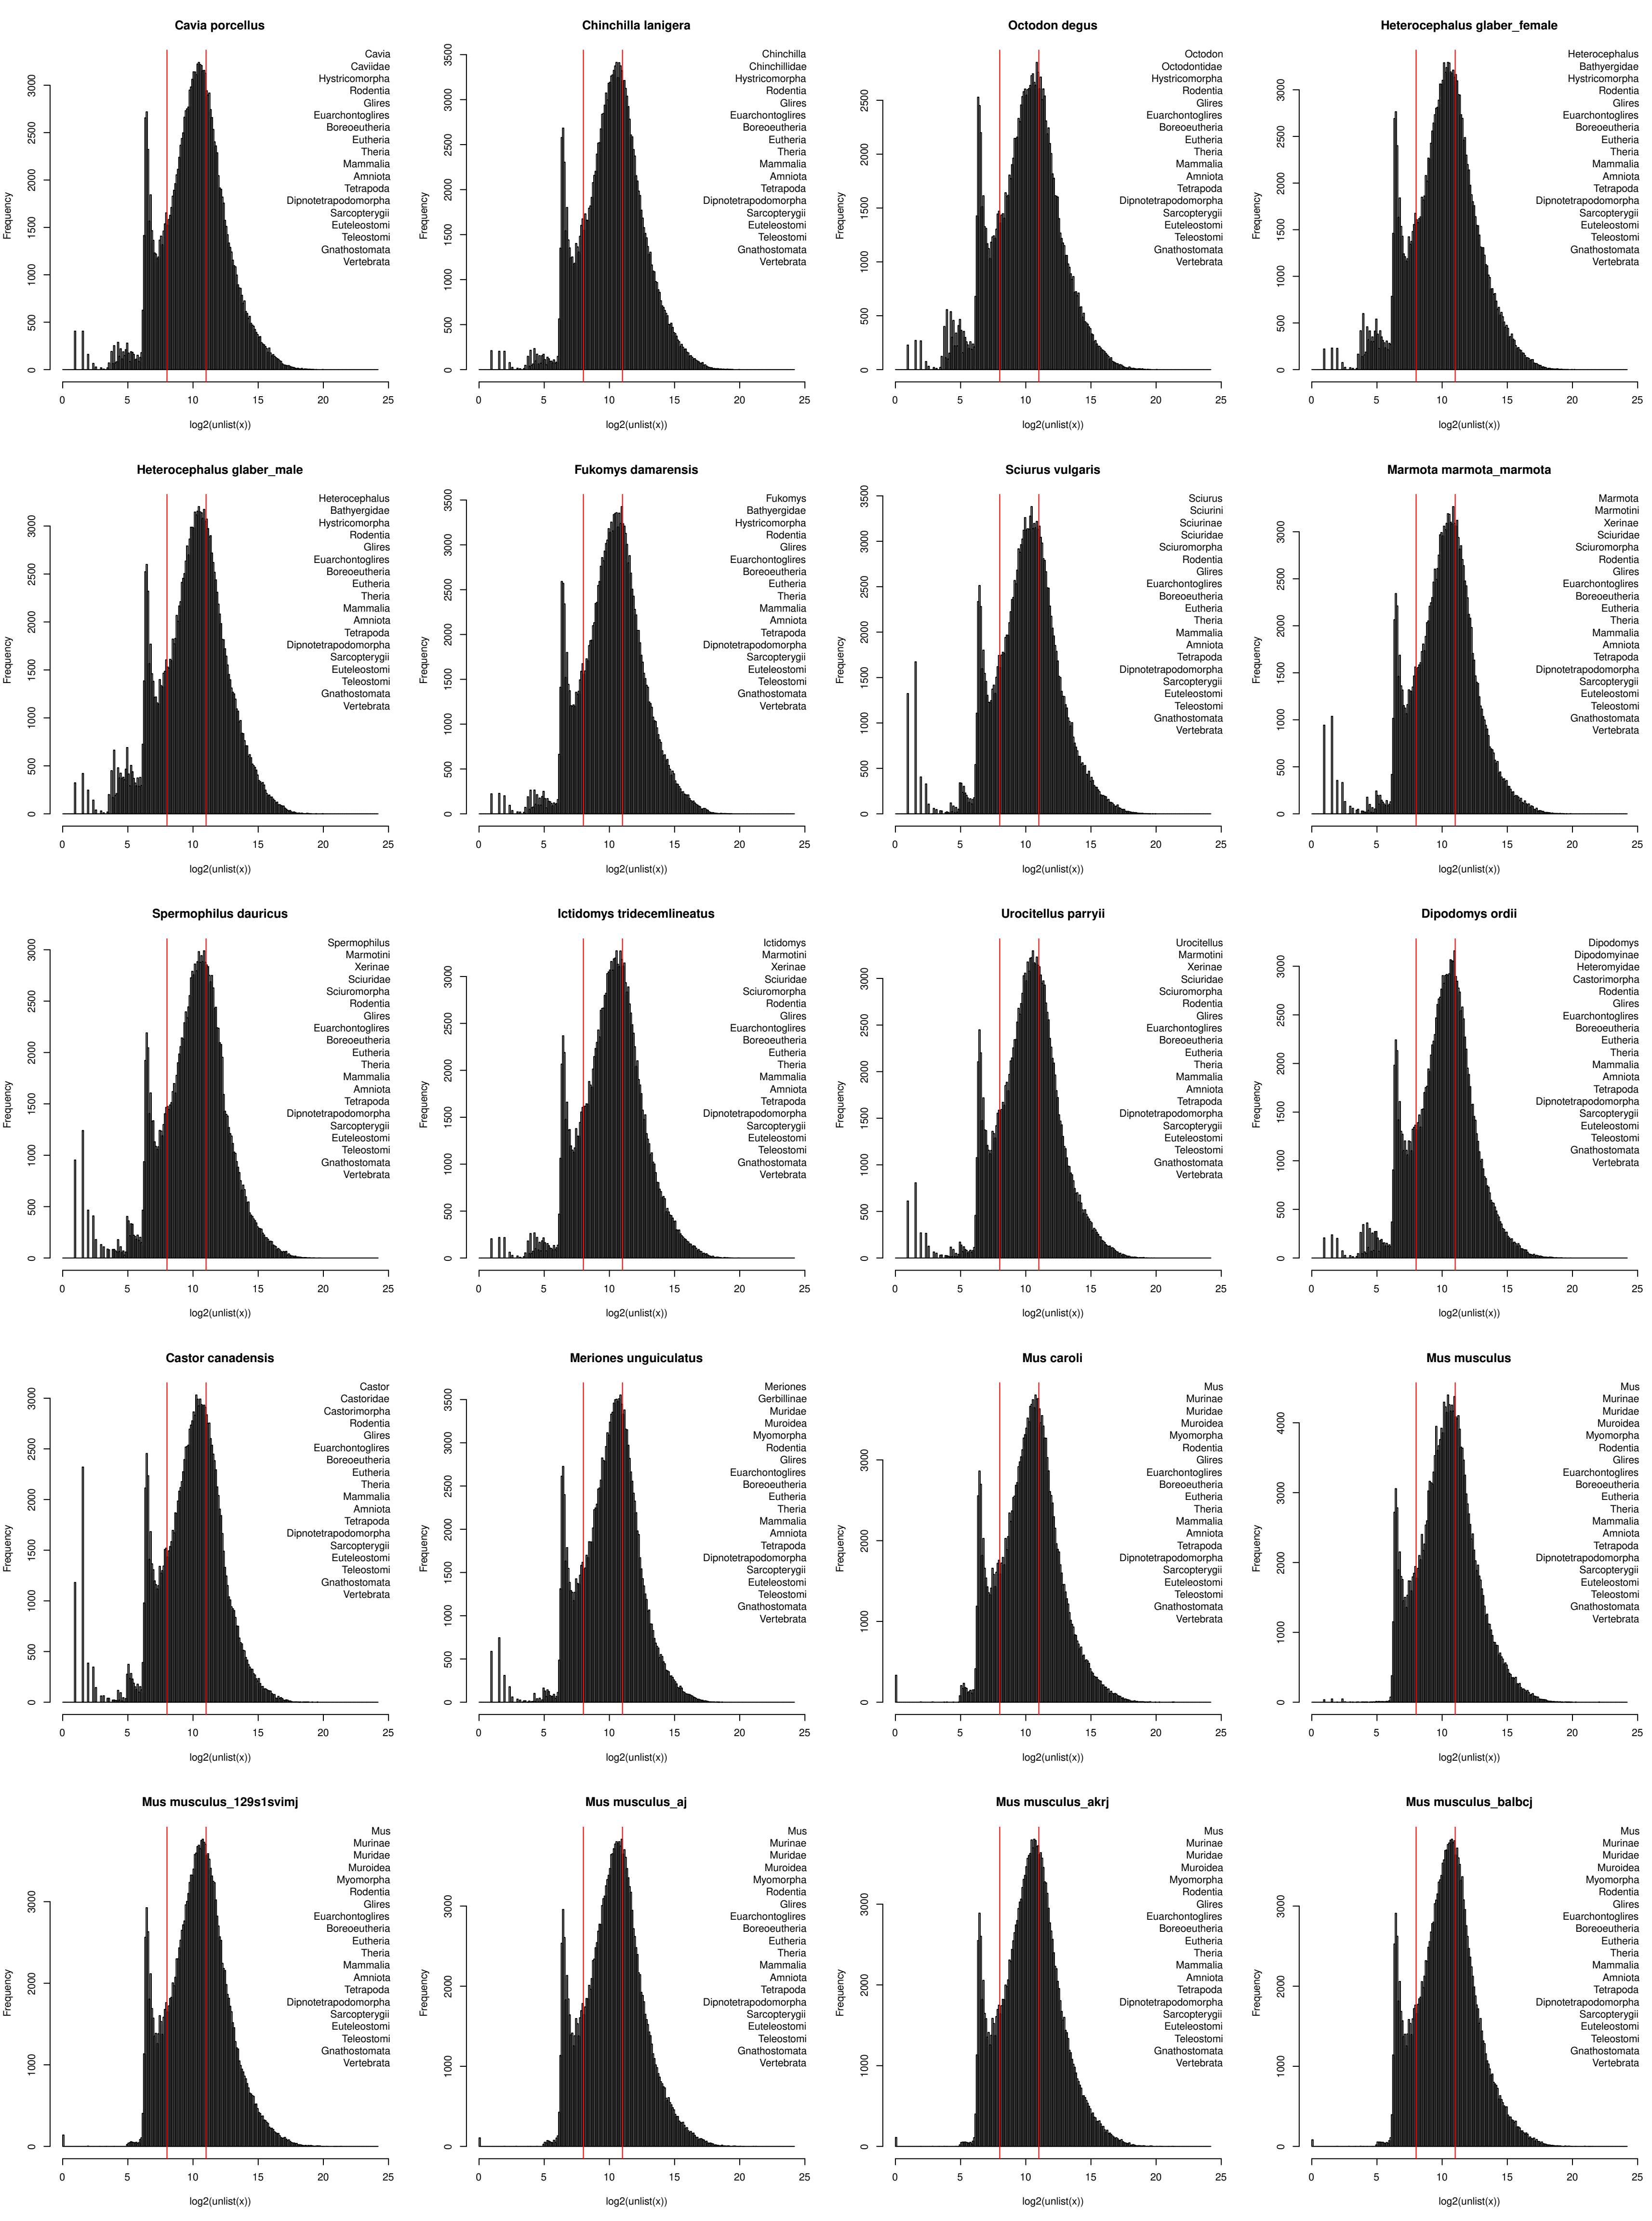





**Microtus ochrogaster**

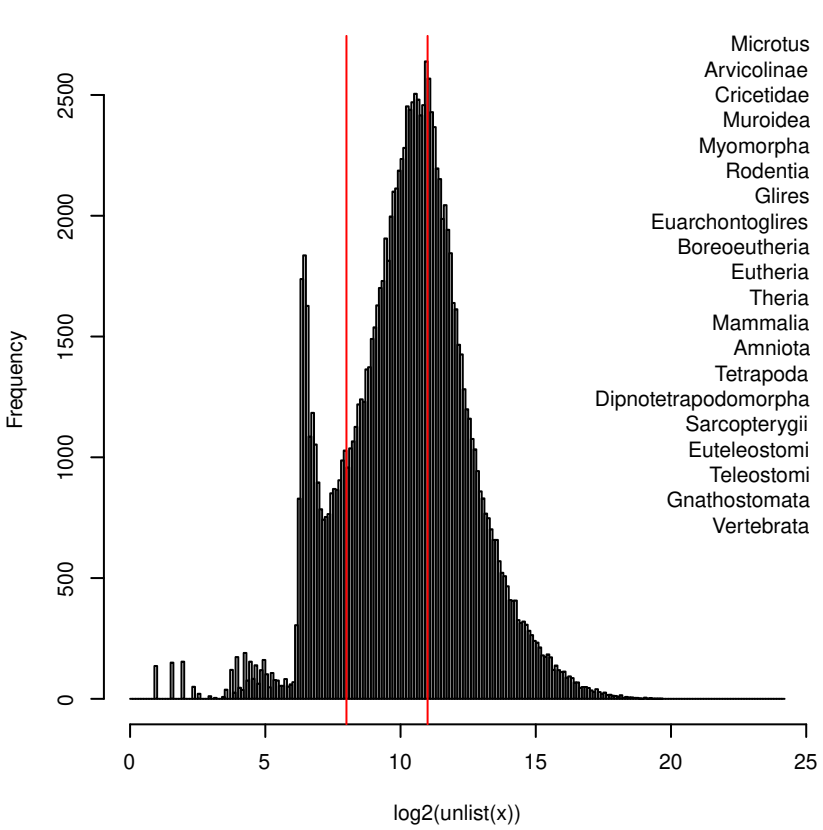

**Peromyscus maniculatus\_bairdii**

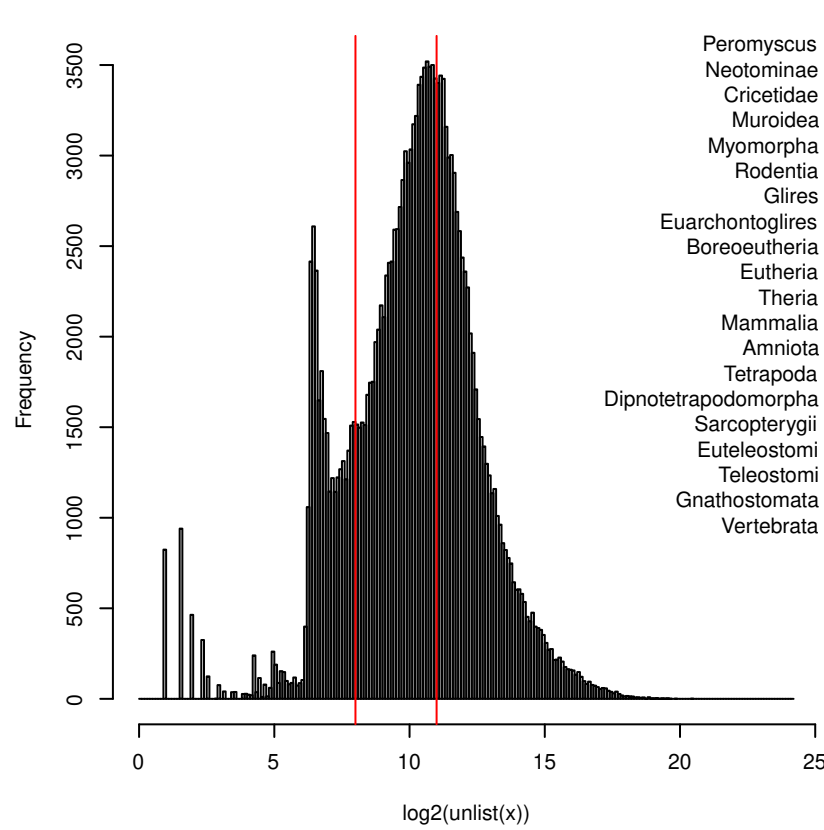

**Jaculus jaculus**

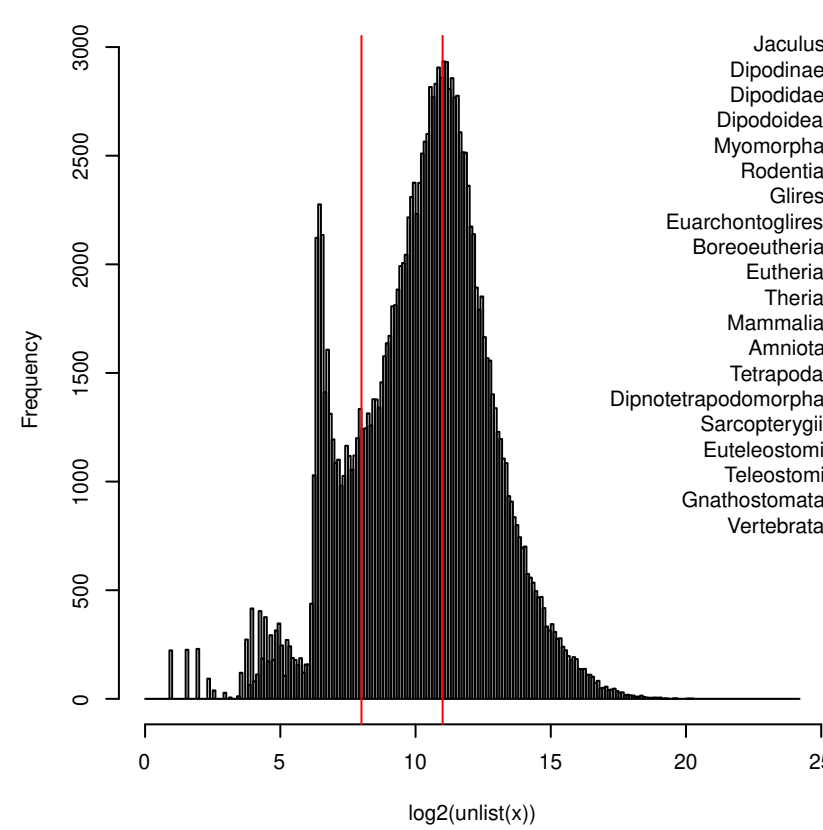

**Eptatretus burgeri**

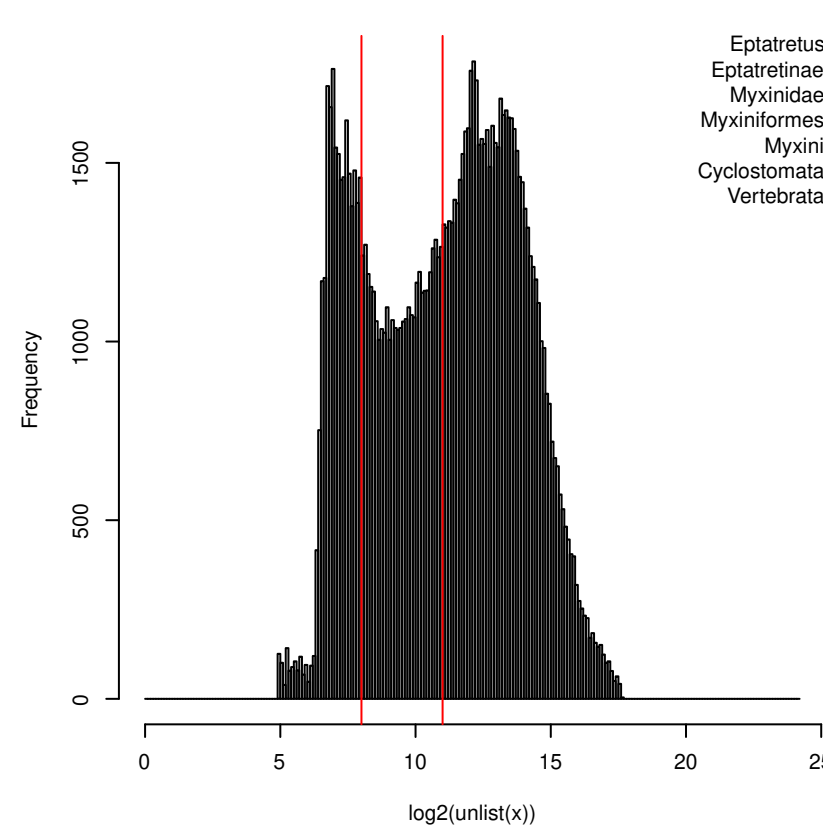

**Petromyzon marinus**

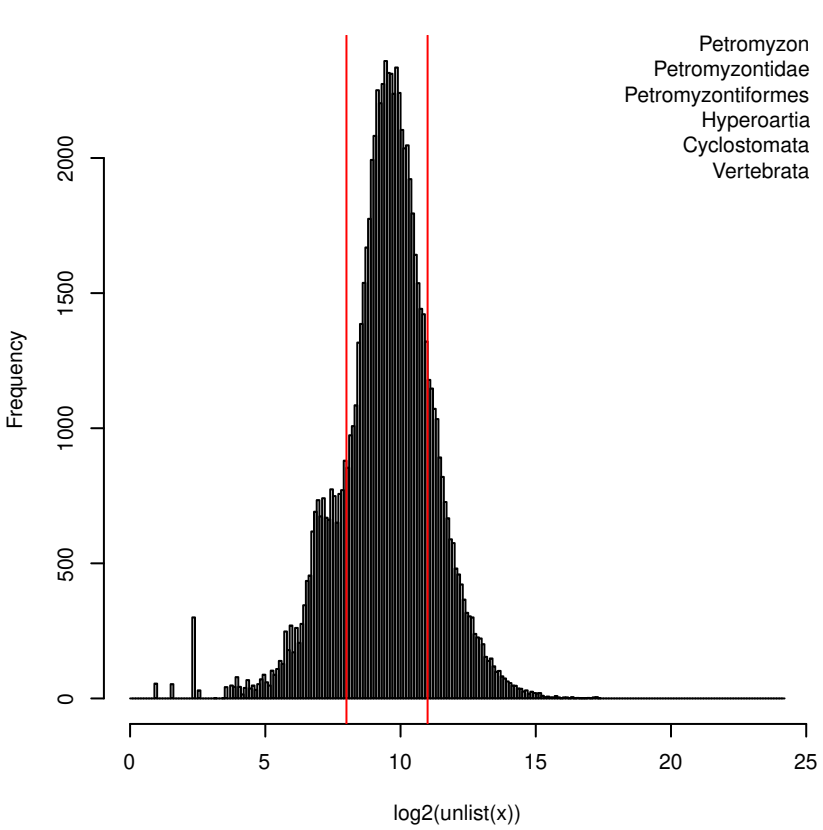

Supplement: 12864_2022_8760_MOESM2_ESM.pdf [file 12864_2022_8760_MOESM2_ESM.pdf]
