# Supplementary material for: Intron size minimisation in teleosts
Source: PubMed Central journal article supplement (PMC9438311; doi:10.1186/s12864-022-08760-w), 2022-09-01

GO:0050896 response to stimulus

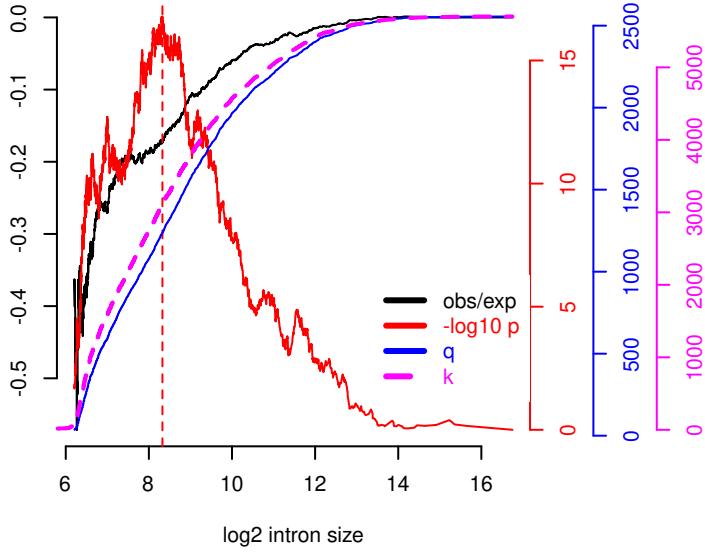

GO:0048699 generation of neurons

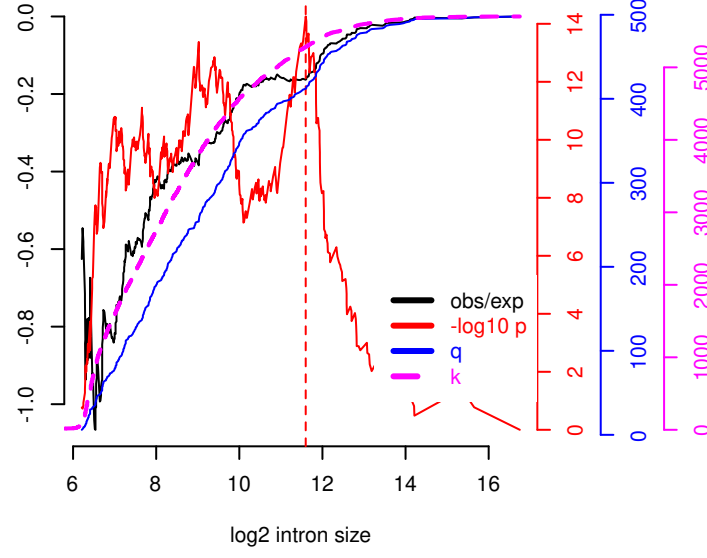

GO:0048523 negative regulation of cellular process

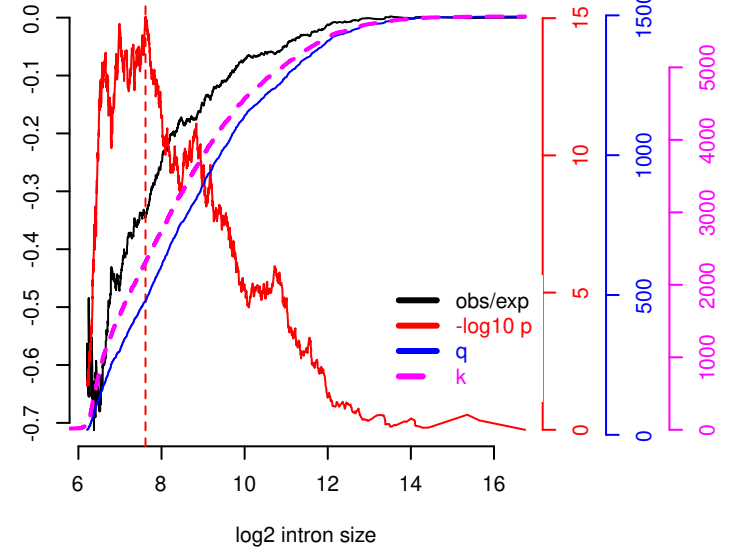

GO:0065008 regulation of biological quality

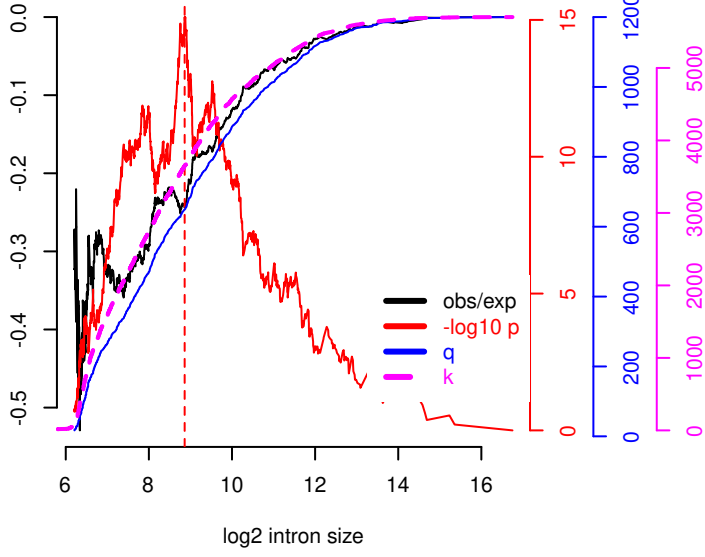

GO:0030182 neuron differentiation

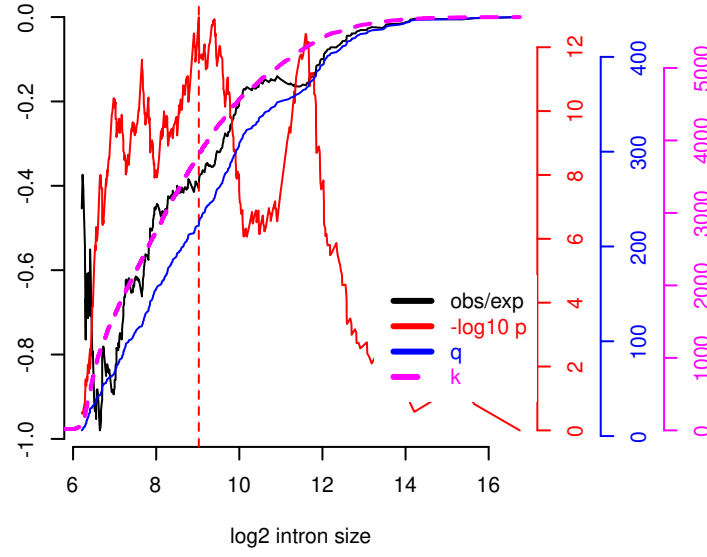

GO:0048583 regulation of response to stimulus

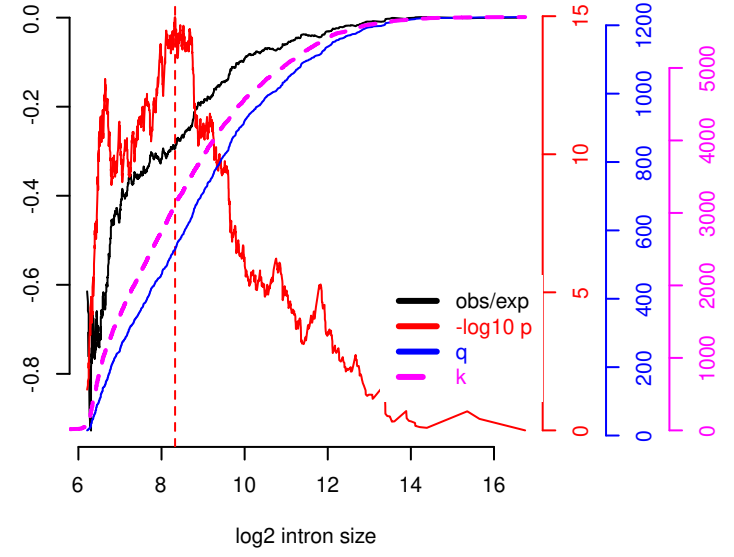

GO:0048519 negative regulation of biological process

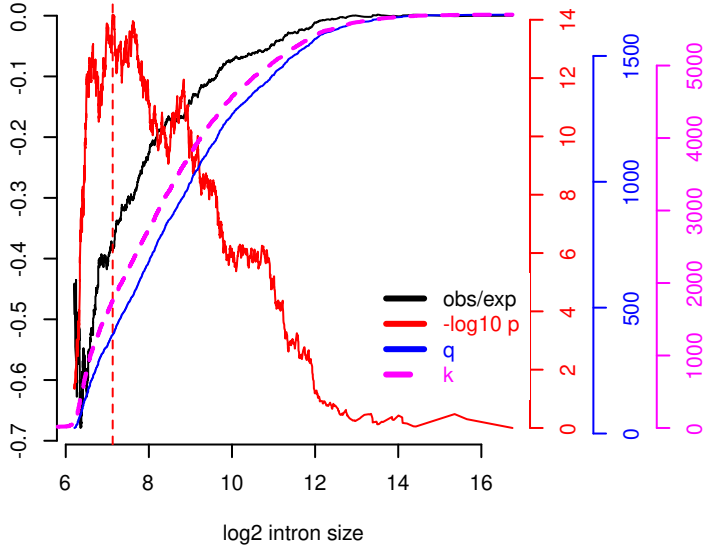

GO:0048666 neuron development

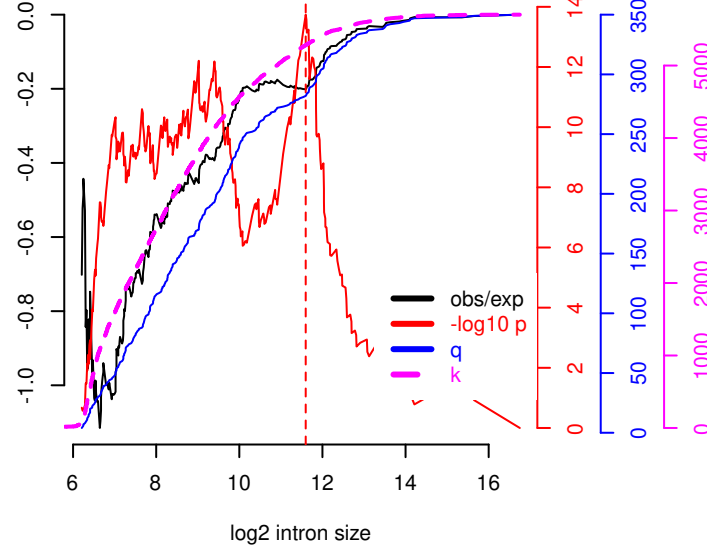

GO:0035556 intracellular signal transduction

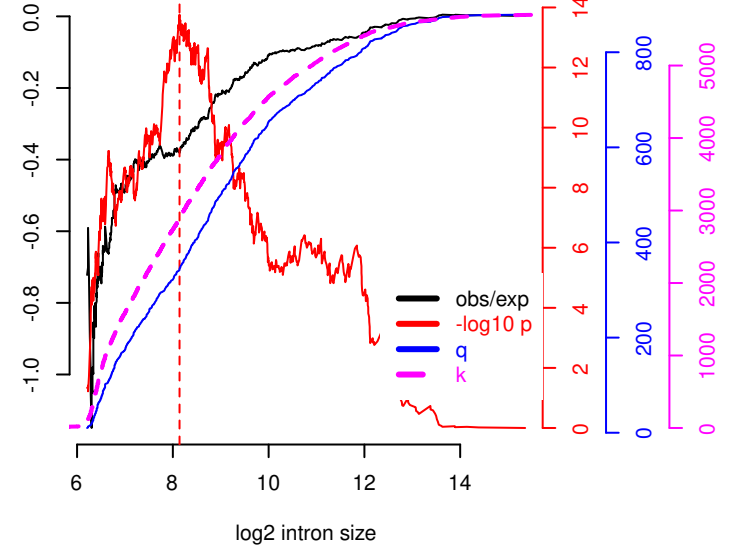

GO:2000026 regulation of multicellular organismal development

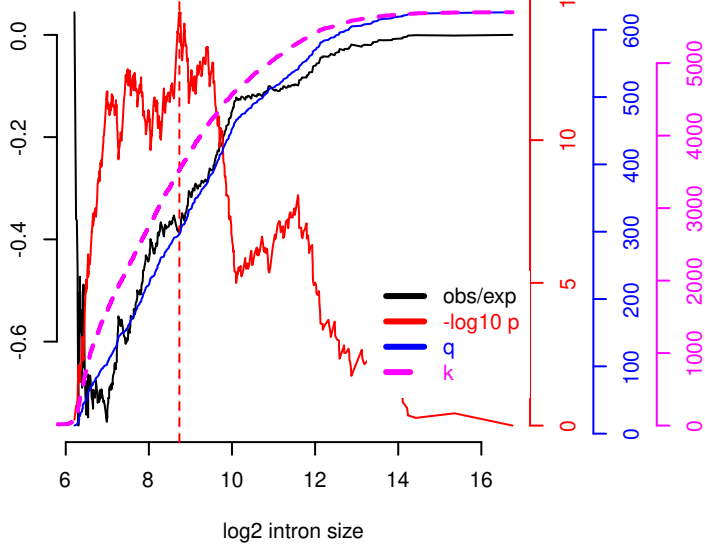

GO:0003008 system process

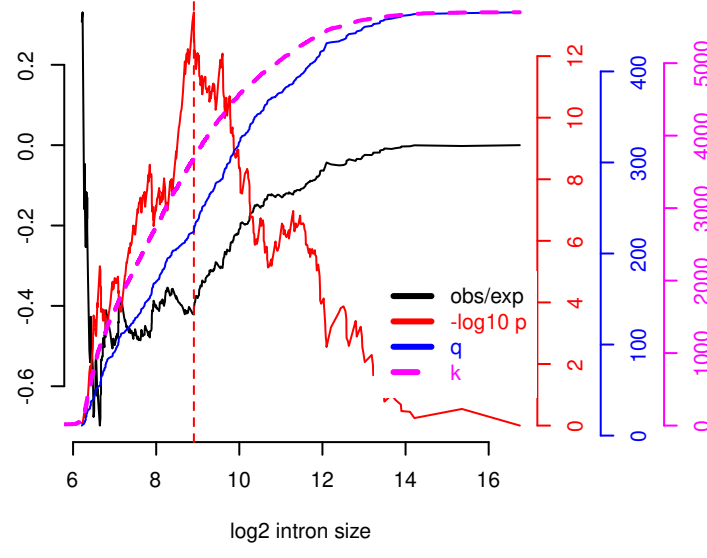

GO:0022603 regulation of anatomical structure morphogenesis

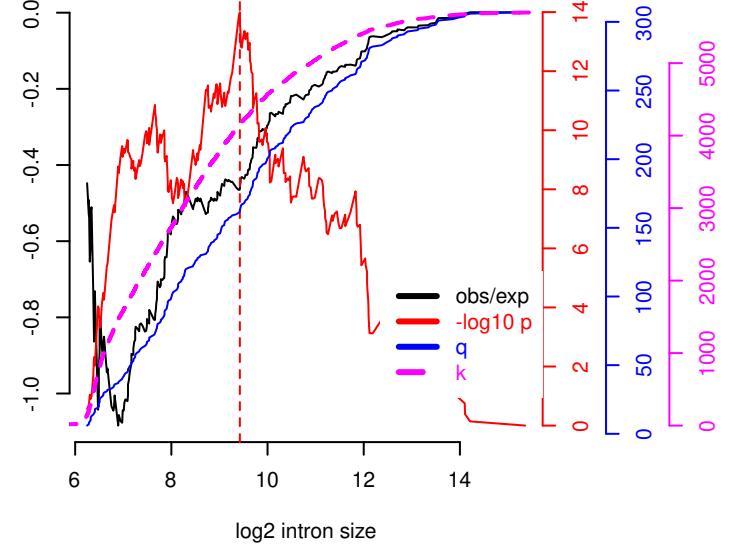

GO:0006935 chemotaxis

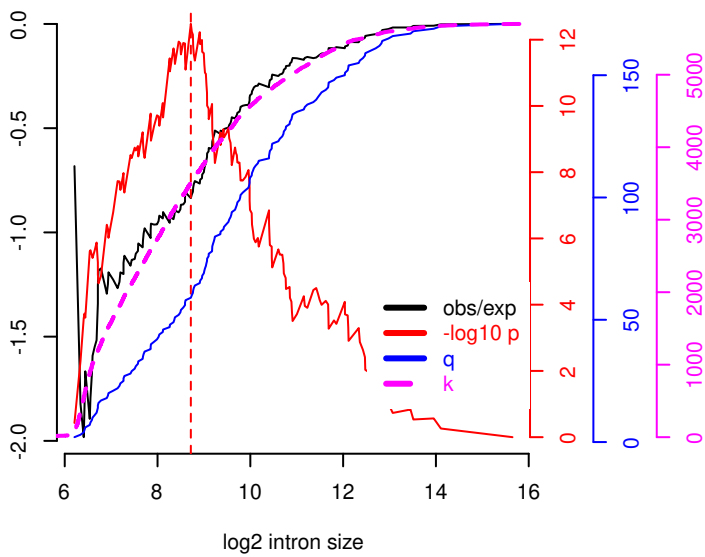

GO:0000904 cell morphogenesis involved in differentiation

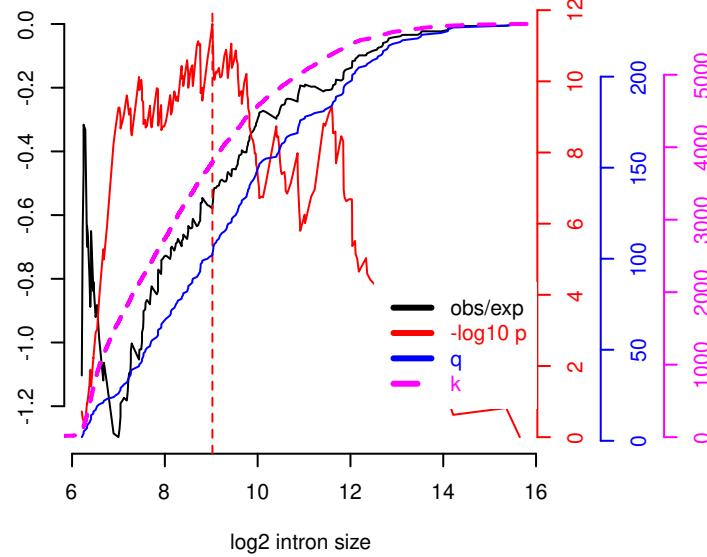

GO:0040011 locomotion

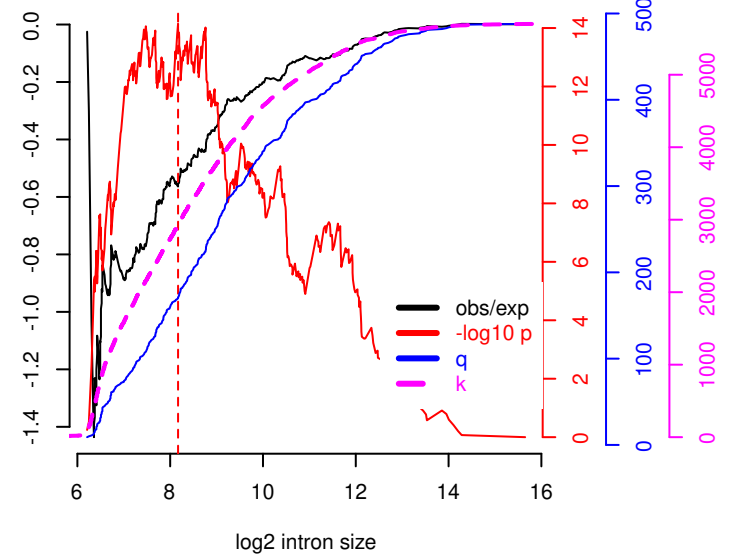



GO:0042330 taxis

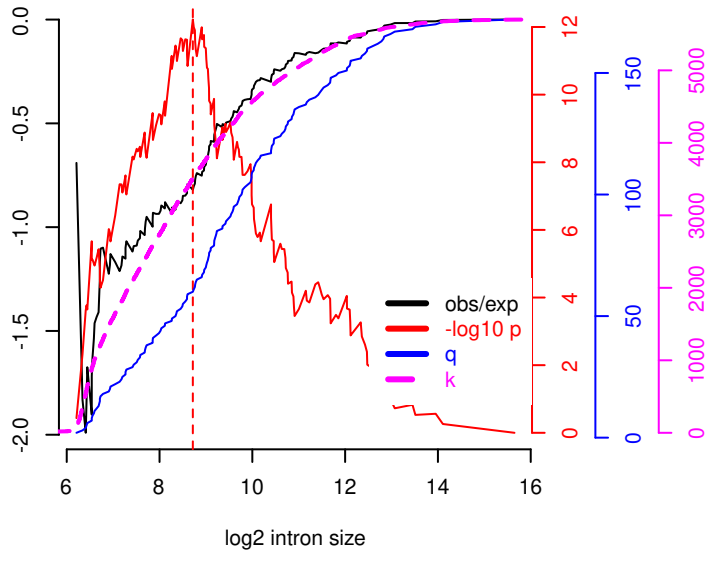

GO:0009888 tissue development

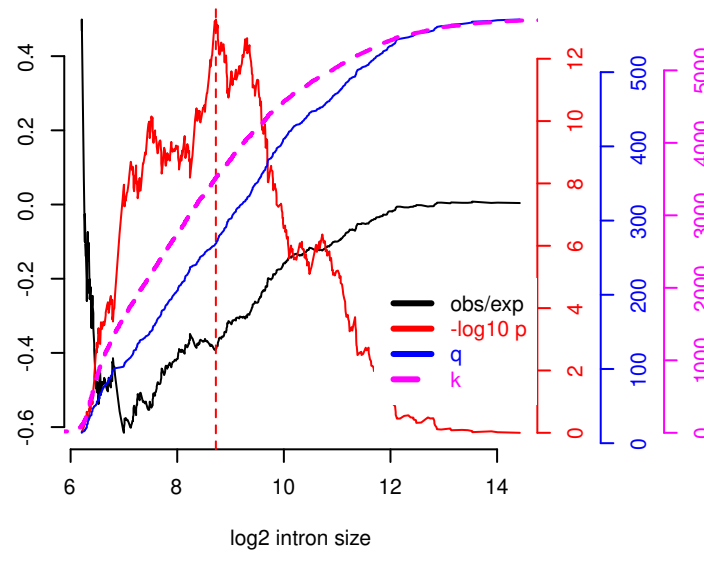

GO:0007416 synapse assembly

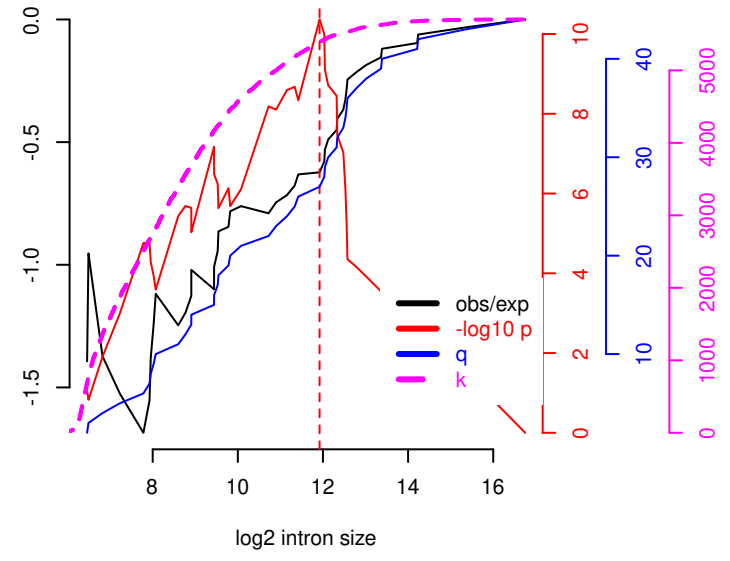

GO:0048858 cell projection morphogenesis

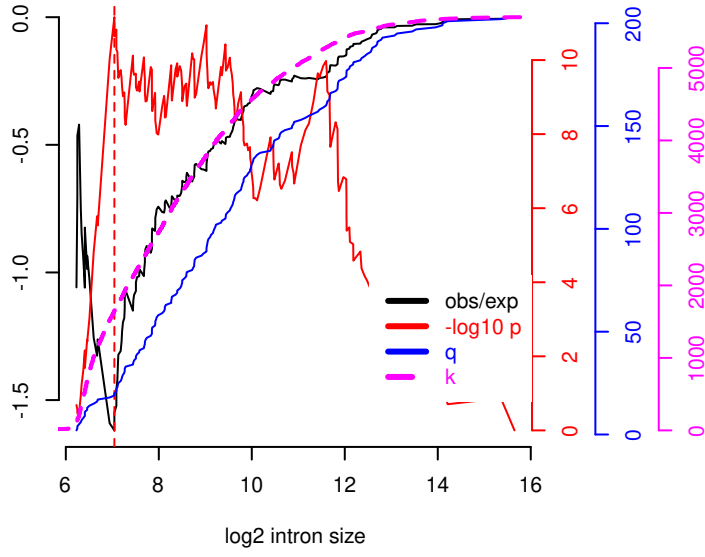

GO:0120039 plasma membrane bounded cell projection morphogenesis

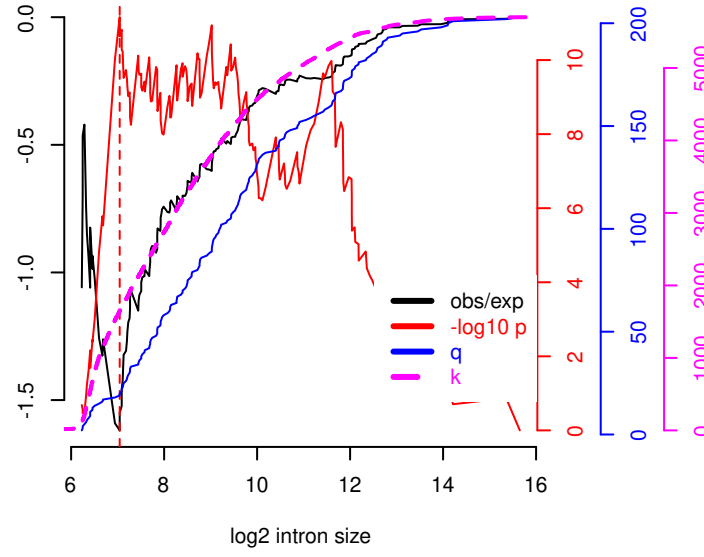

GO:0048812 neuron projection morphogenesis

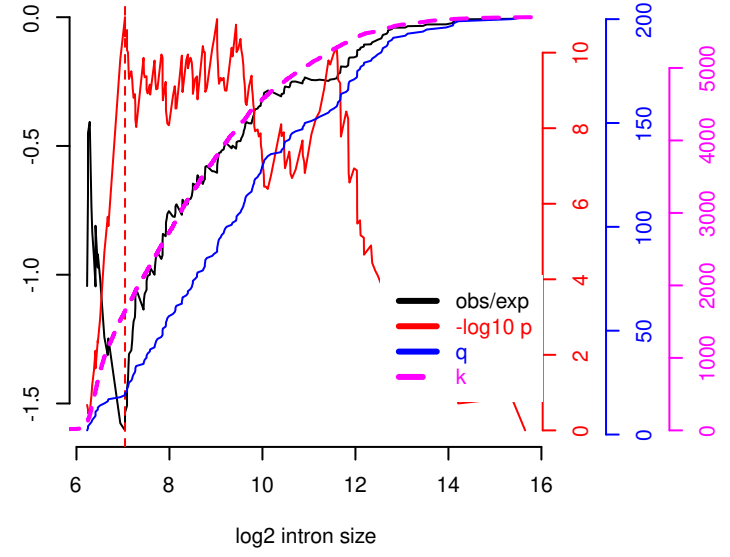

GO:0035295 tube development

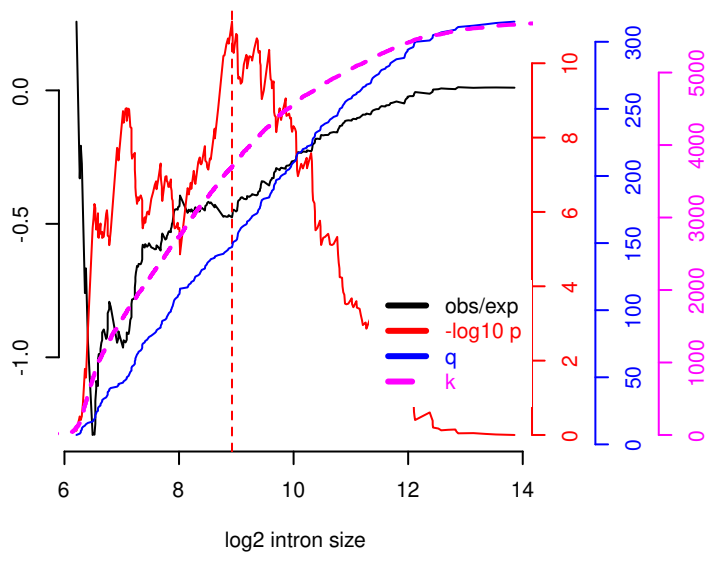

GO:0031175 neuron projection development

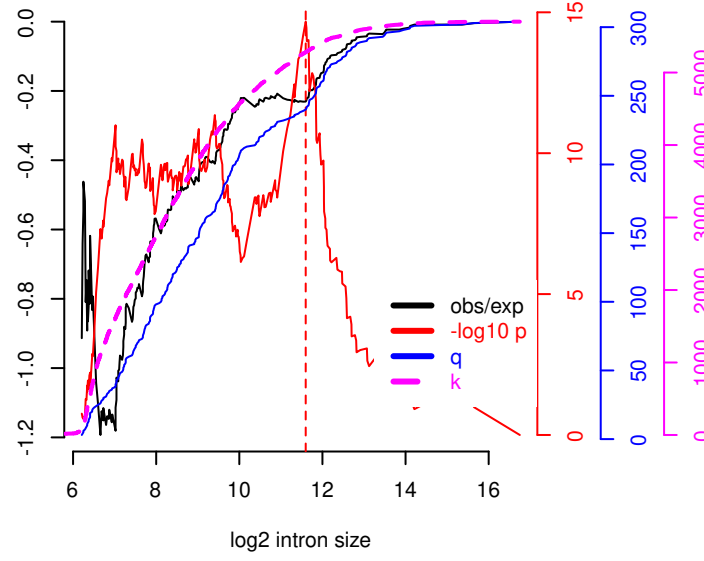

GO:0050808 synapse organization

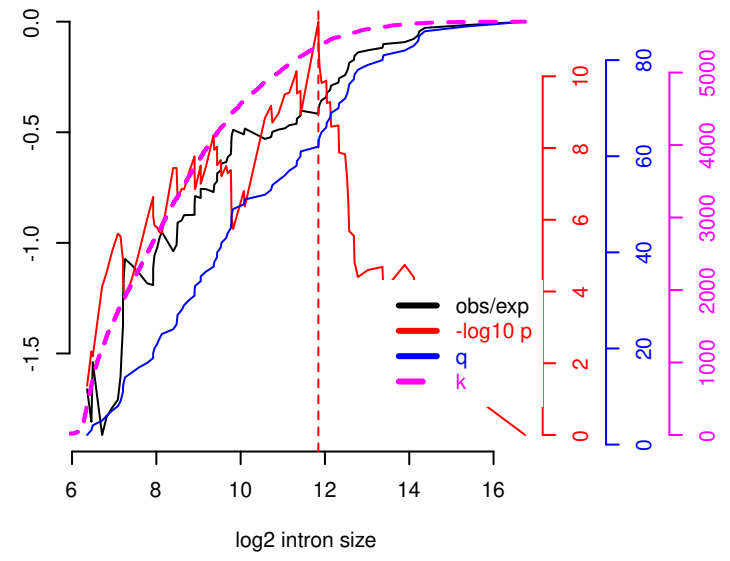

GO:0001503 ossification

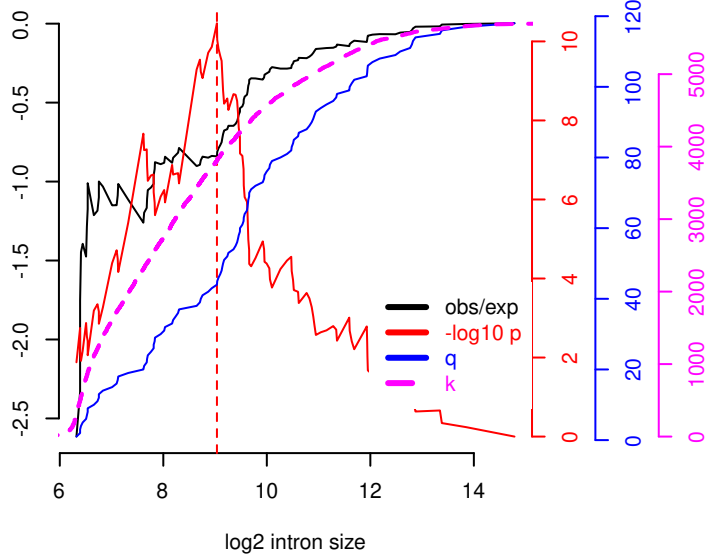

GO:0048667 cell morphogenesis involved in neuron differentiation

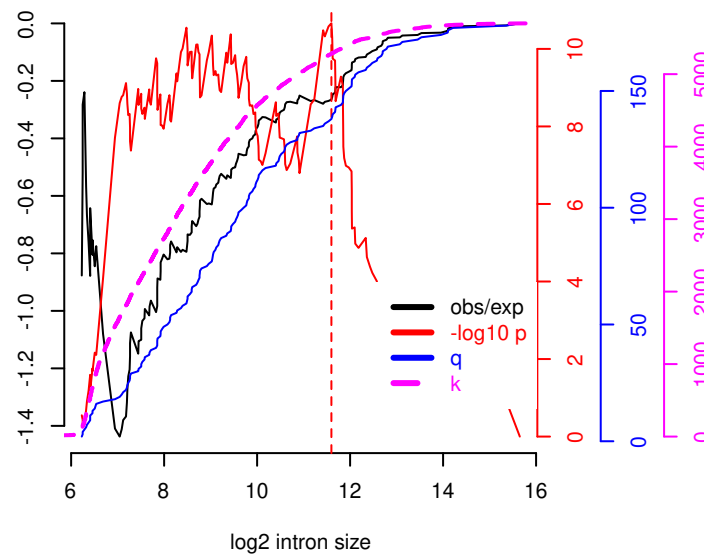

GO:0032990 cell part morphogenesis

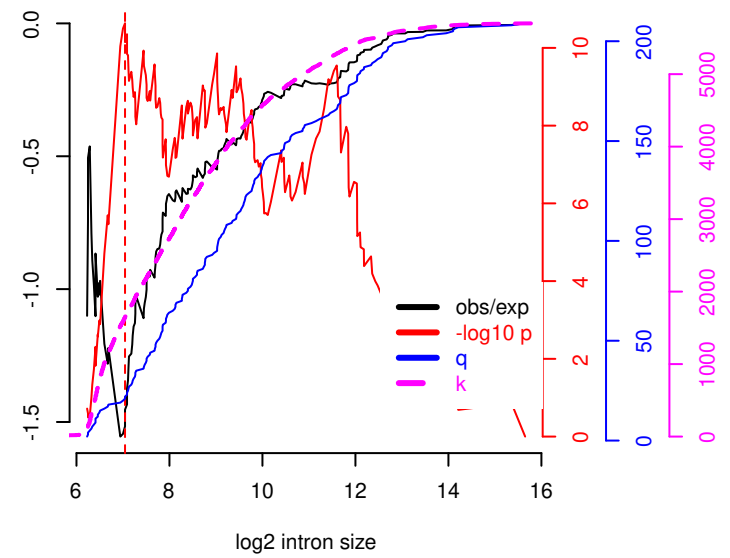

GO:0030155 regulation of cell adhesion

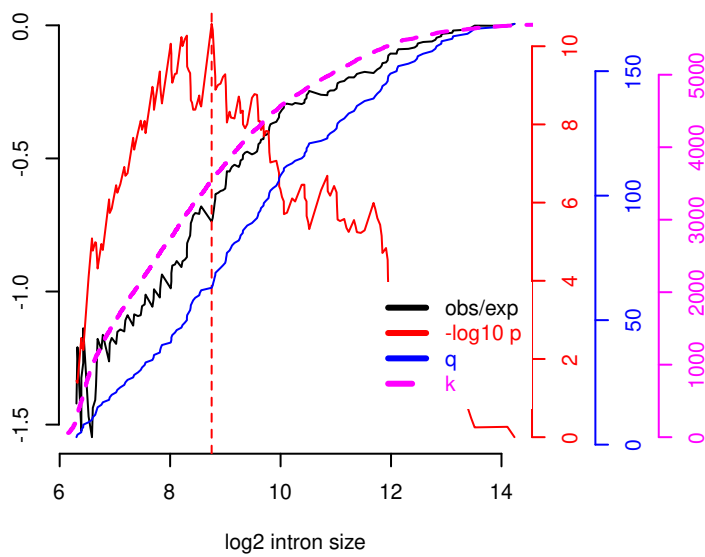

GO:0061564 axon development

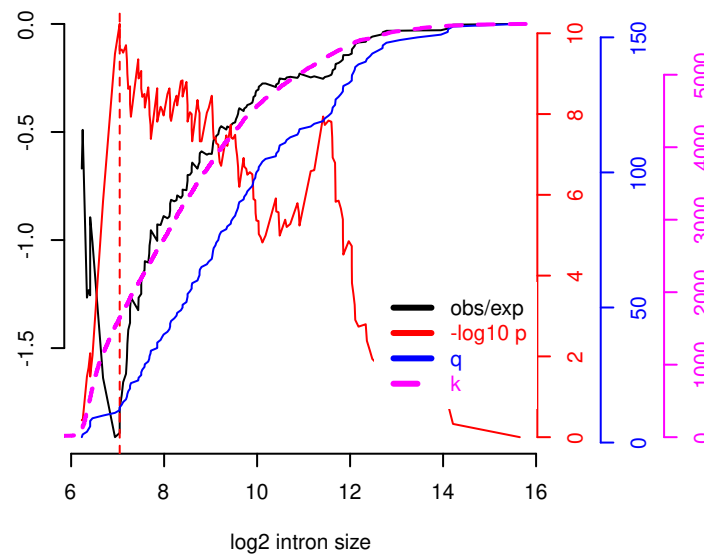

GO:0006928 movement of cell or subcellular component

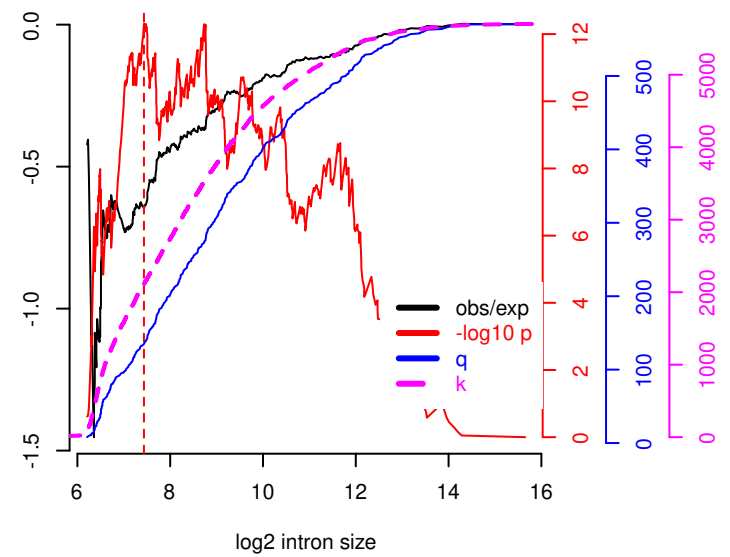

GO:0032879 regulation of localization

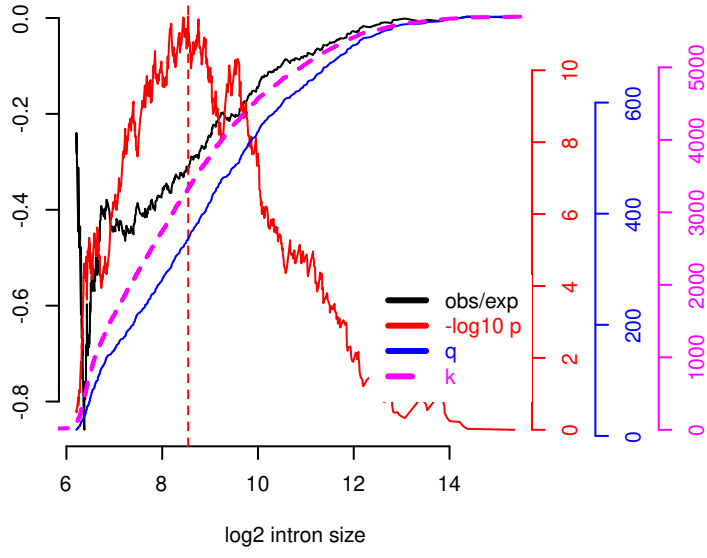

GO:0048518 positive regulation of biological process

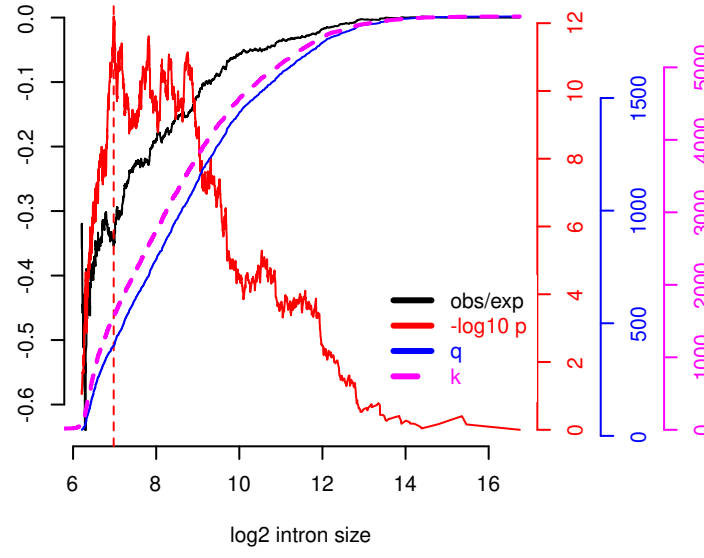

GO:0098609 cell-cell adhesion

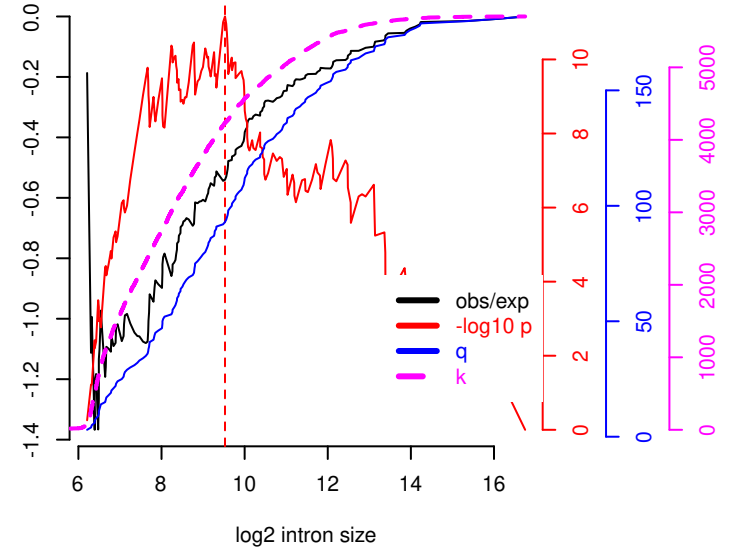

GO:0016477 cell migration

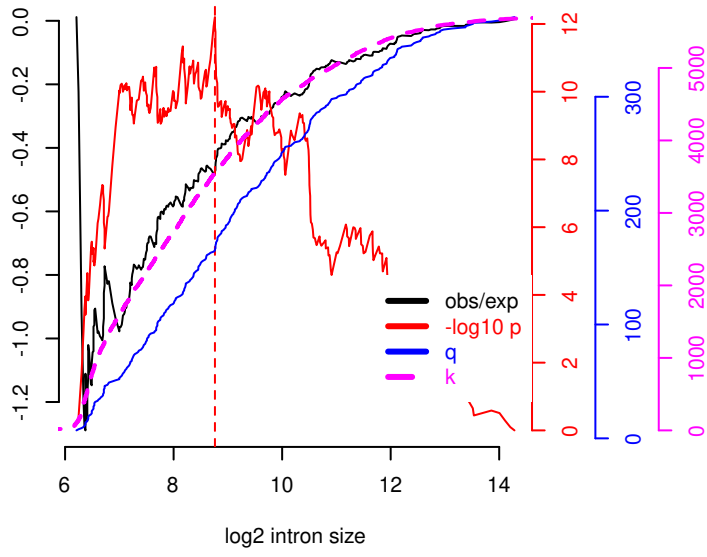

GO:0007167 enzyme linked receptor protein signaling pathway

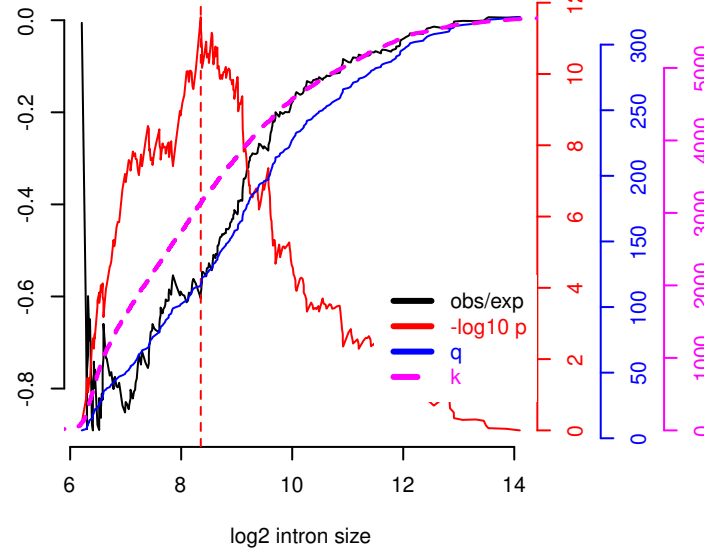

GO:1905114 cell surface receptor signaling pathway involved in cell-cell signaling

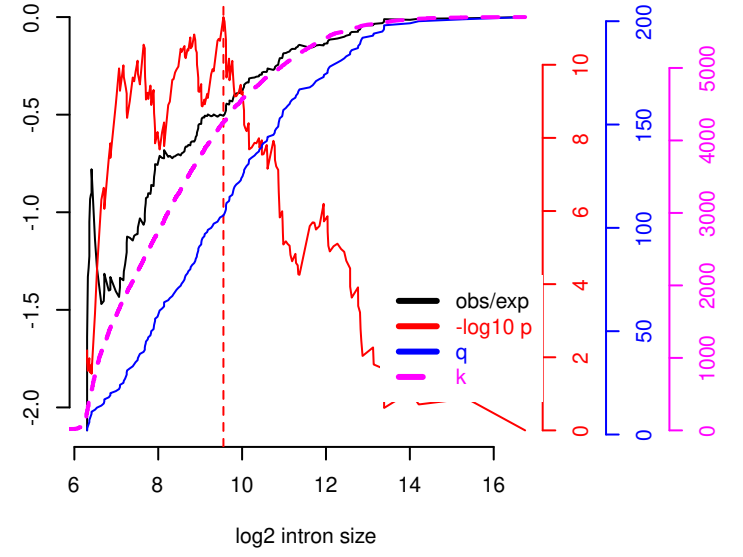

GO:0045595 regulation of cell differentiation

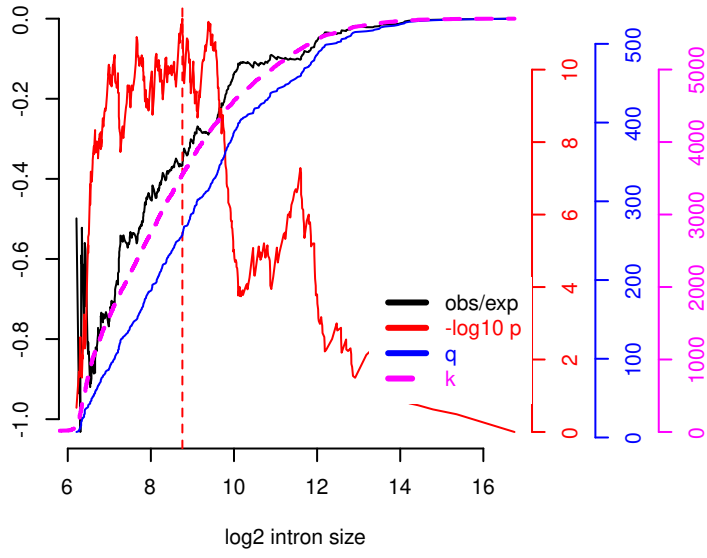

GO:0070887 cellular response to chemical stimulus

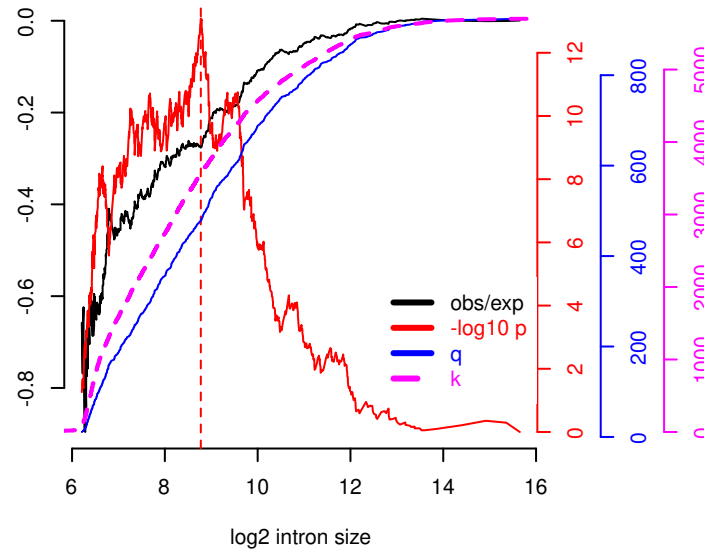

GO:0030029 actin filament-based process

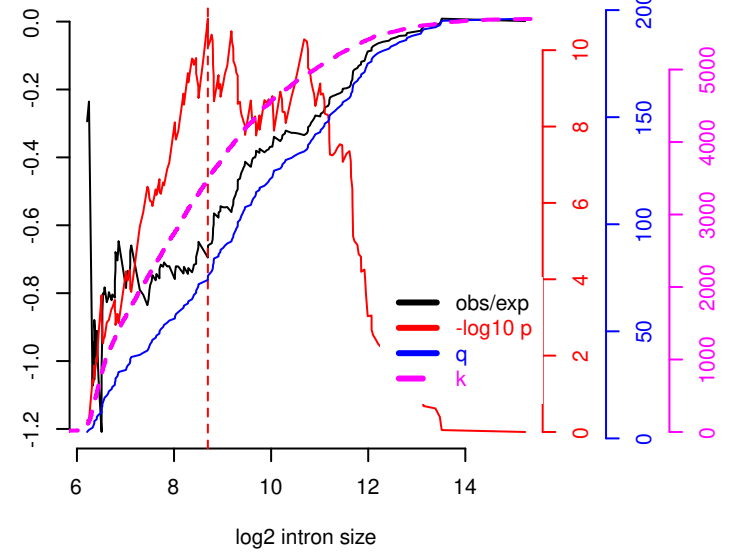

GO:0009887 animal organ morphogenesis

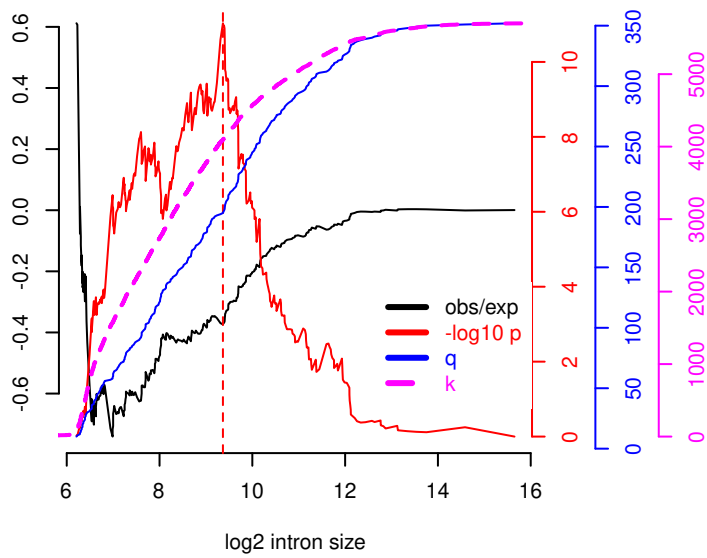

GO:0042221 response to chemical

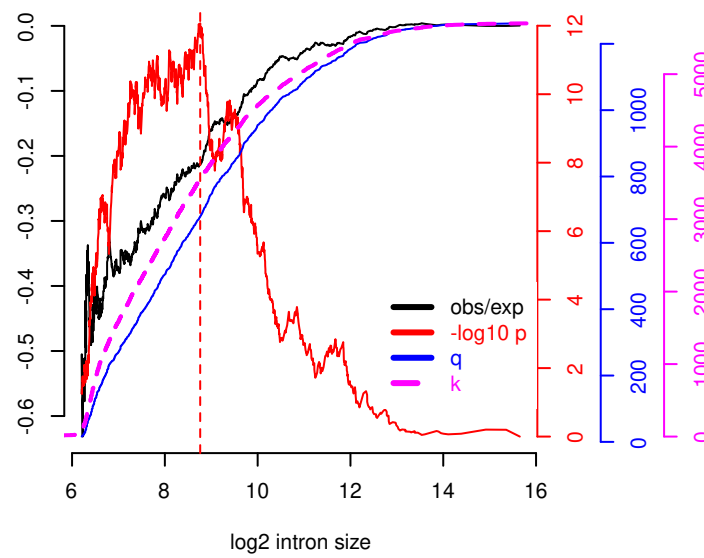

GO:0048522 positive regulation of cellular process

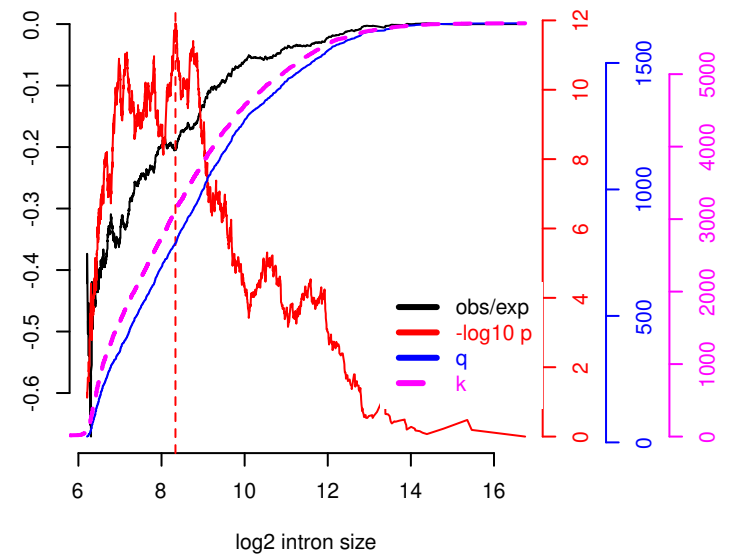

GO:0051960 regulation of nervous system development

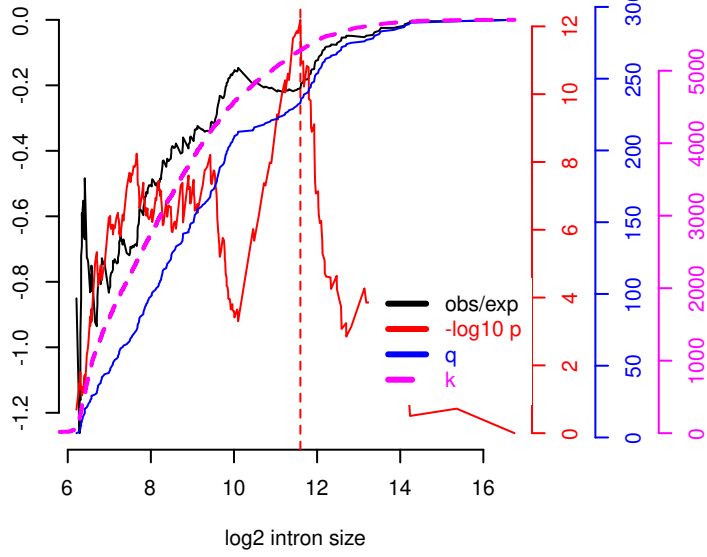

GO:0098742 cell-cell adhesion via plasma-membrane adhesion molecules

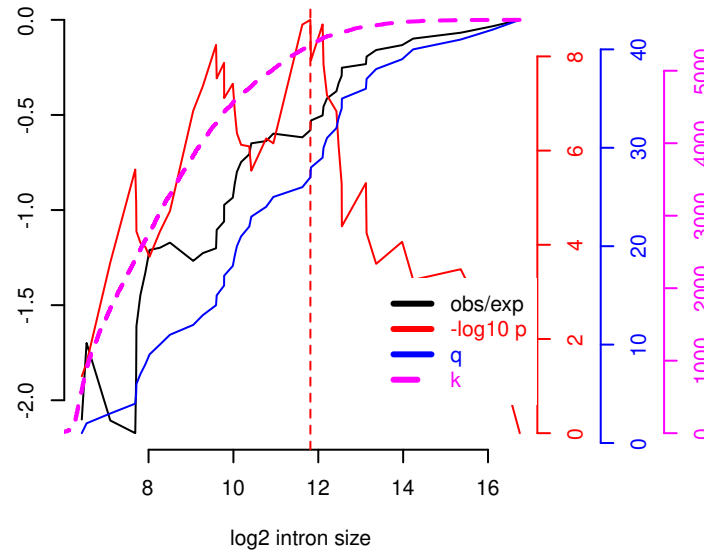

GO:0007409 axonogenesis

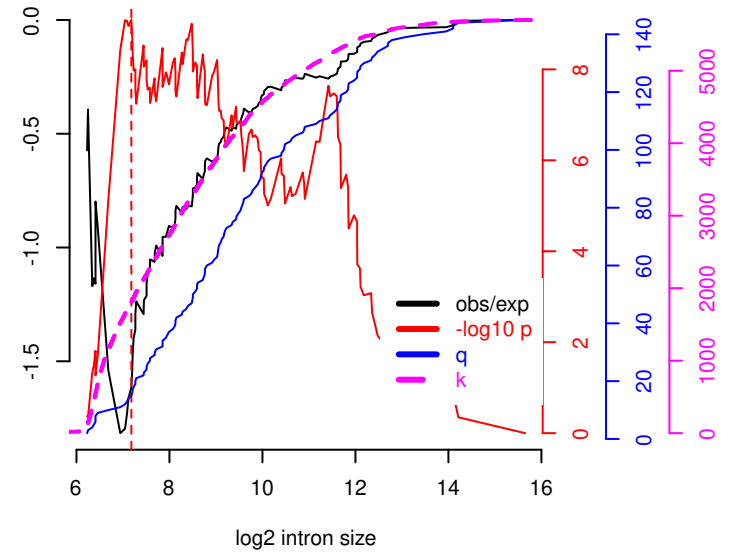

GO:0071310 cellular response to organic substance

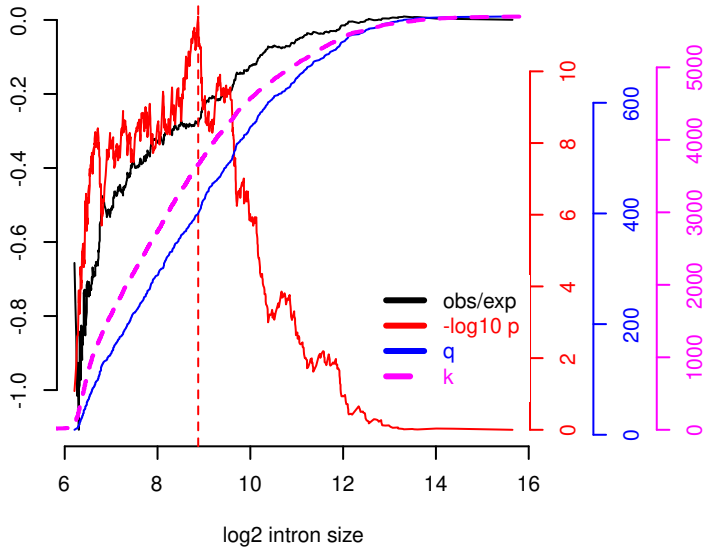

GO:0043087 regulation of GTPase activity

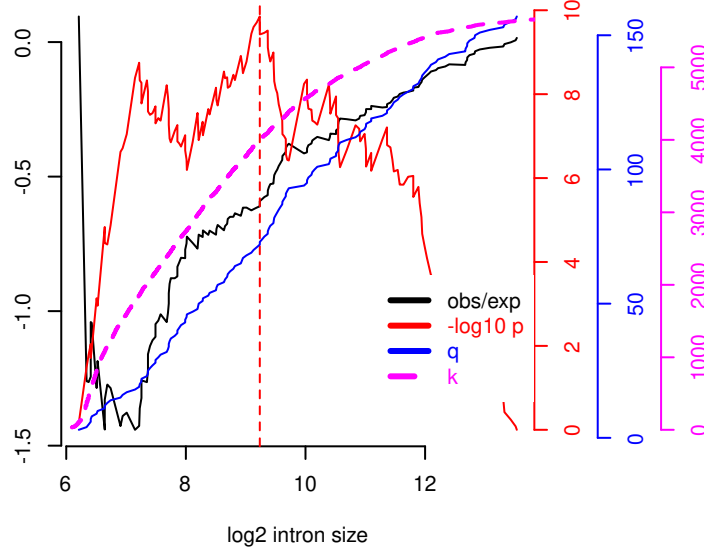

GO:0030036 actin cytoskeleton organization

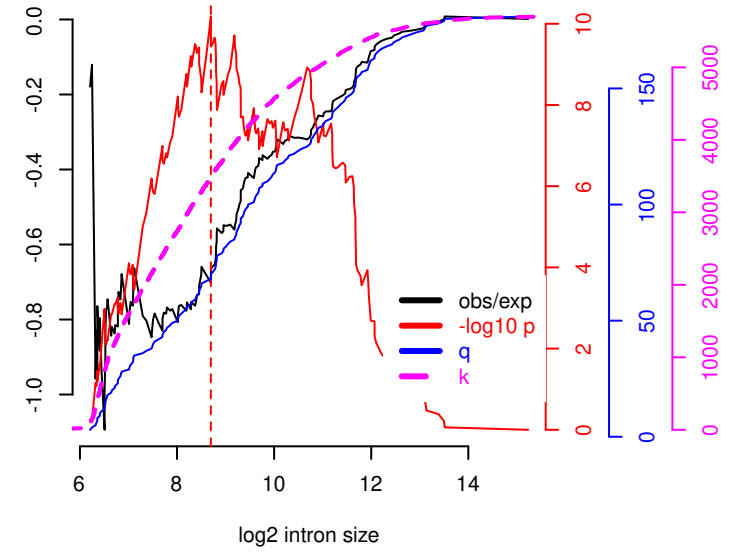

GO:0016358 dendrite development

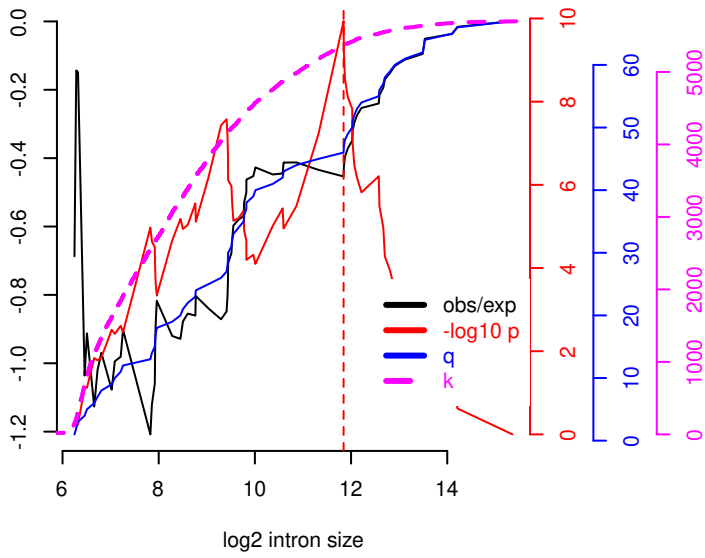

GO:0007411 axon guidance

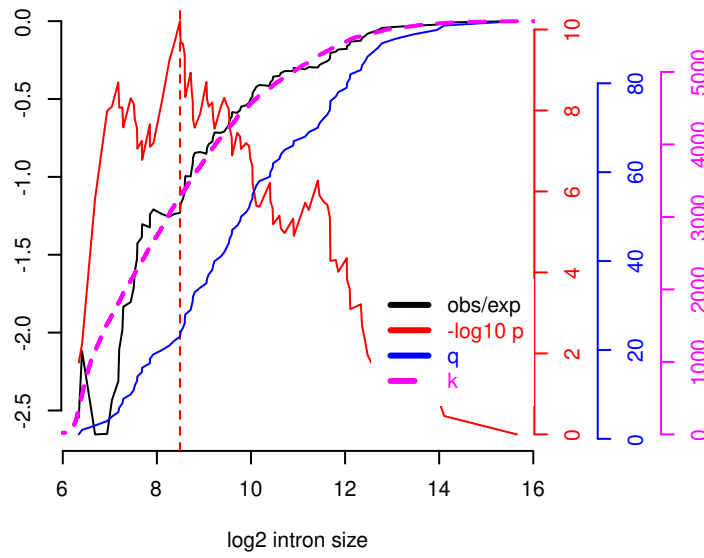

GO:0097485 neuron projection guidance

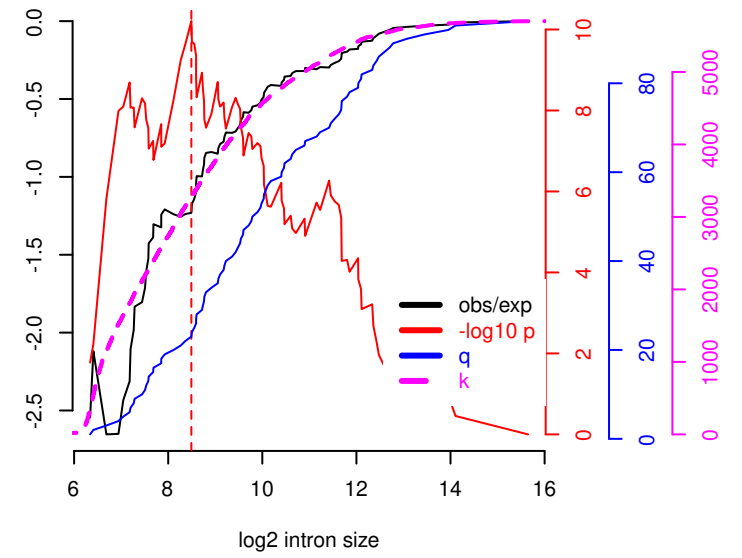

GO:0048870 cell motility

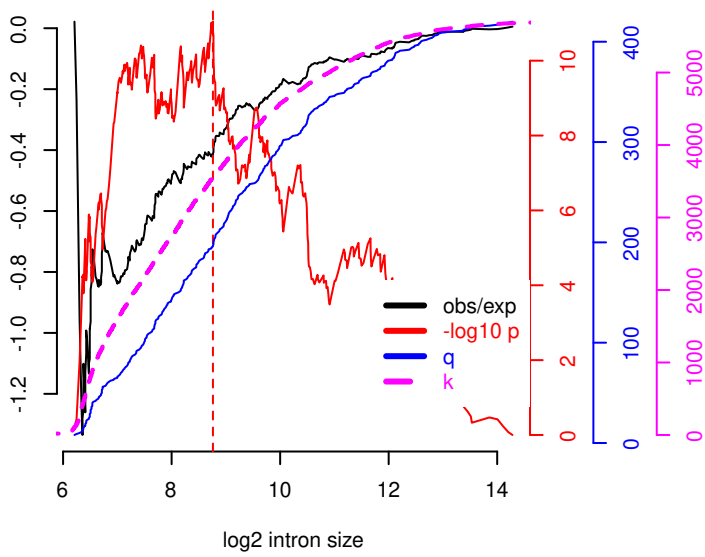

GO:0051674 localization of cell

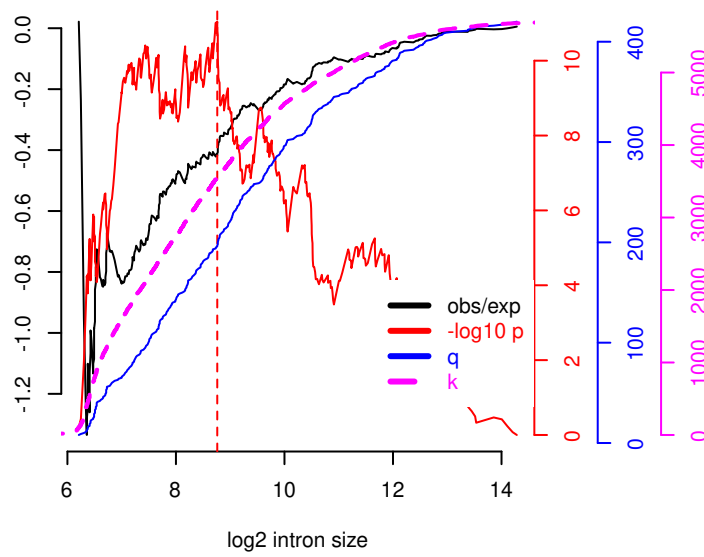

GO:1902531 regulation of intracellular signal transduction

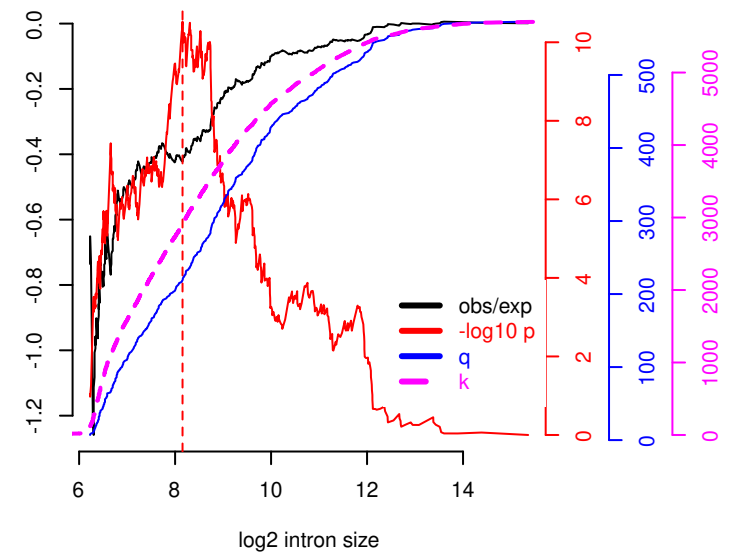

GO:0048585 negative regulation of response to stimulus

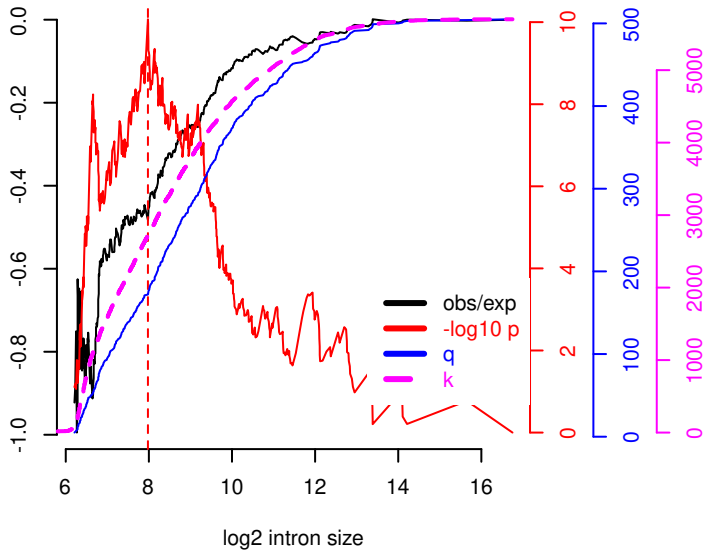

GO:0035239 tube morphogenesis

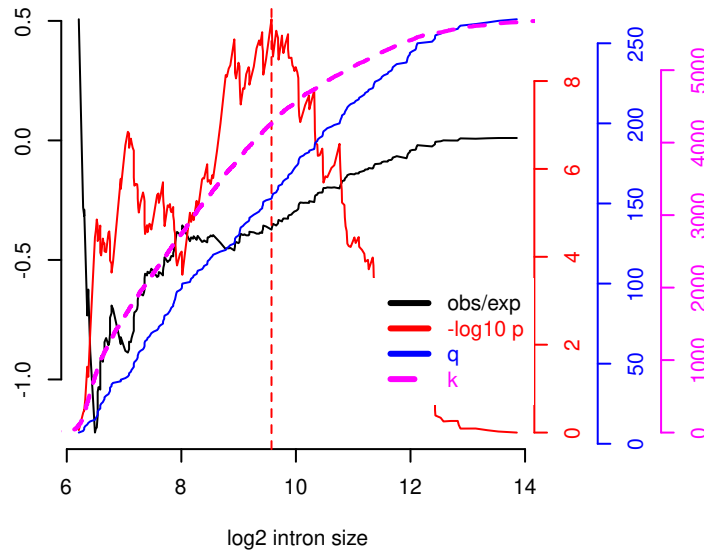

GO:0061061 muscle structure development

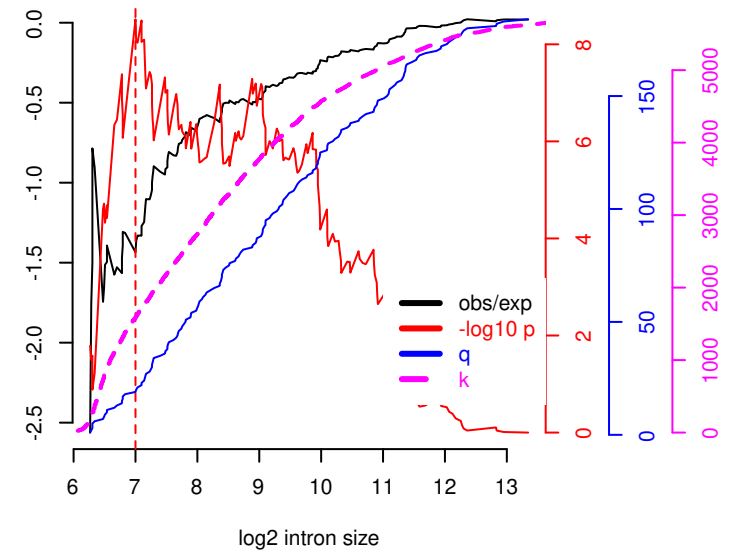

GO:0120035 regulation of plasma membrane bounded cell projection organization

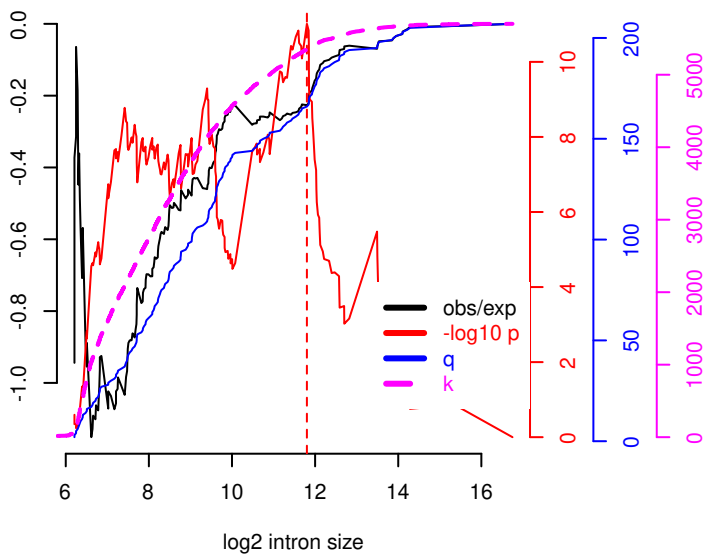

GO:0051094 positive regulation of developmental process

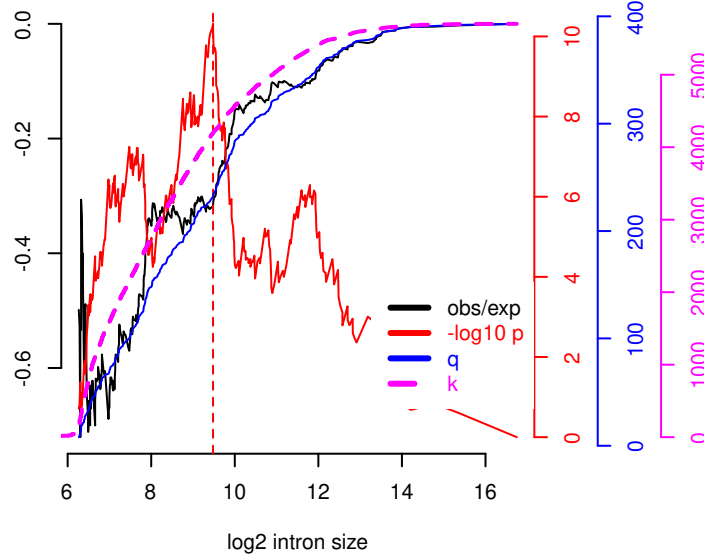

GO:0051179 localization

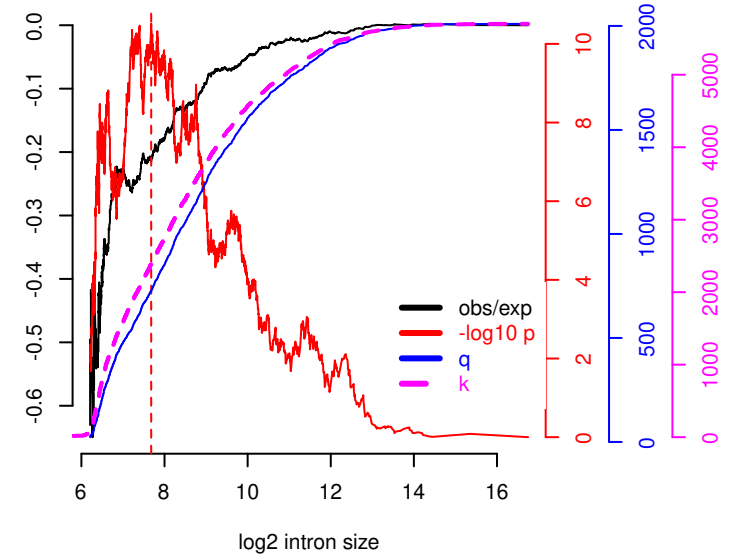

GO:0010648 negative regulation of cell communication

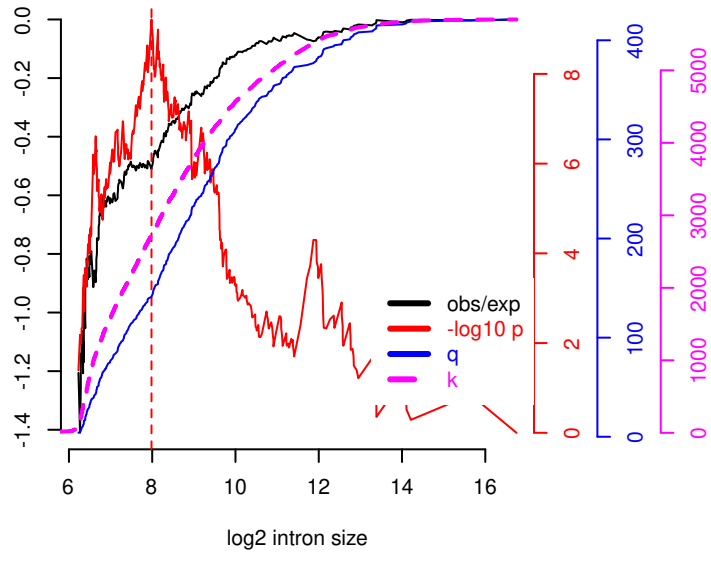

GO:0007186 G protein-coupled receptor signaling pathway

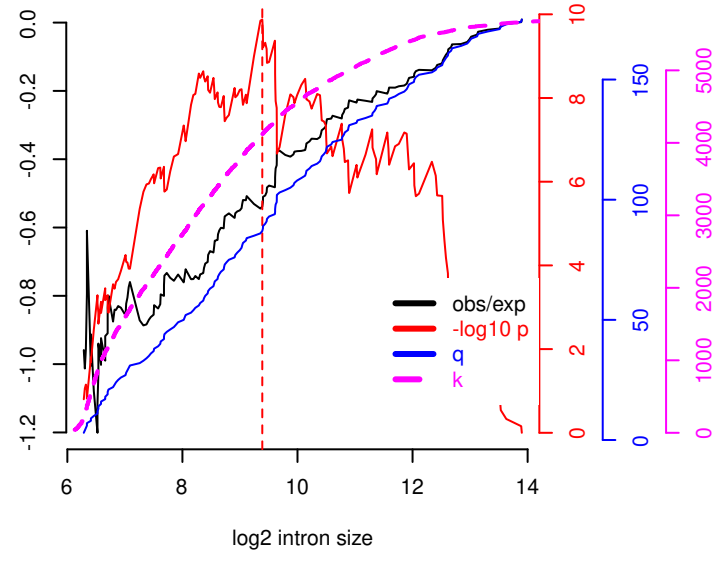

GO:0051963 regulation of synapse assembly

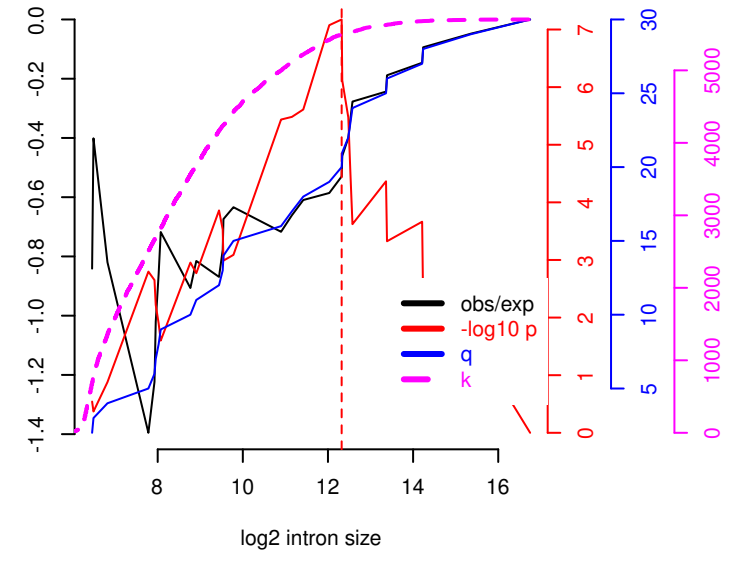

GO:0072359 circulatory system development

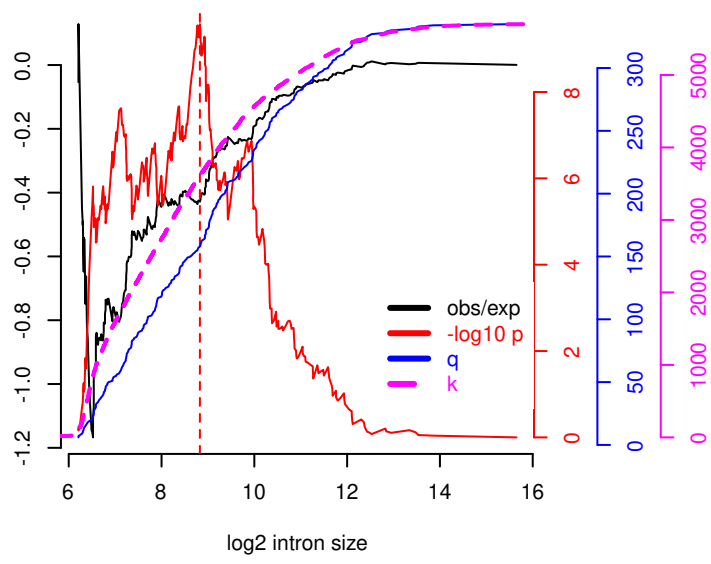

GO:0010975 regulation of neuron projection development

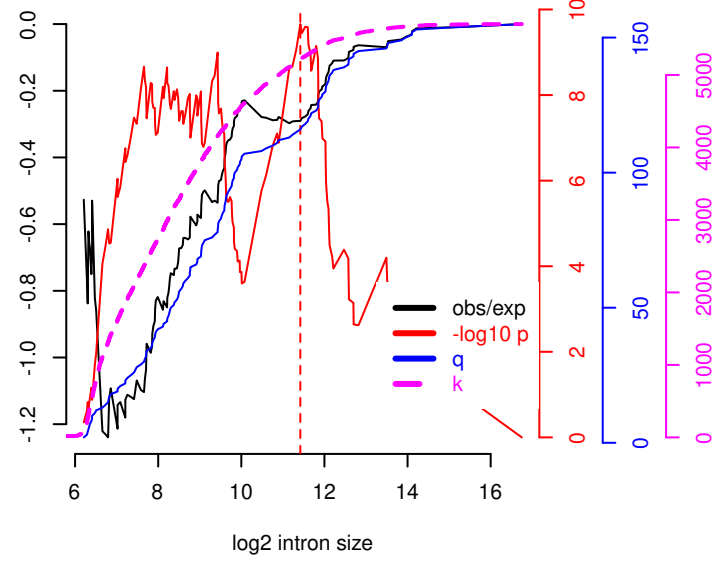



GO:0038023 signaling receptor activity

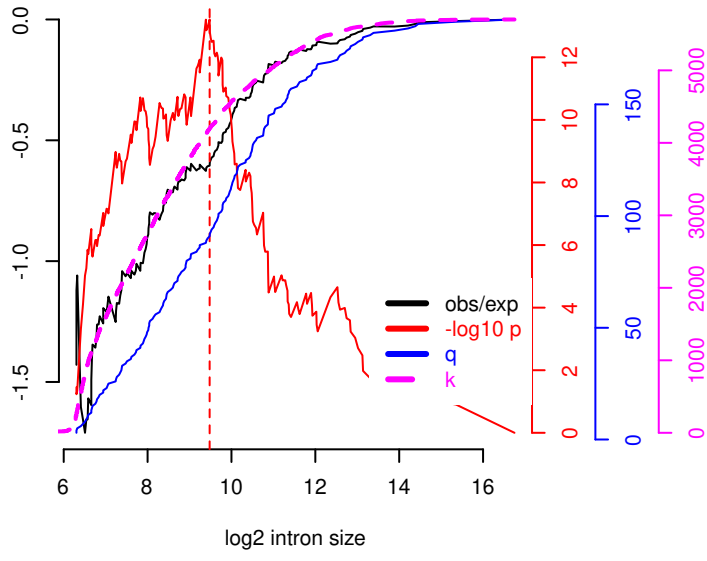

GO:0060089 molecular transducer activity

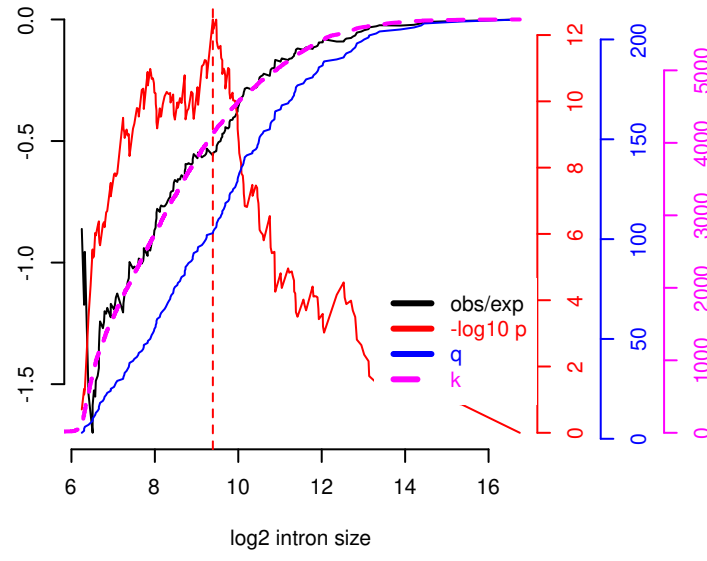

GO:0004888 transmembrane signaling receptor activity

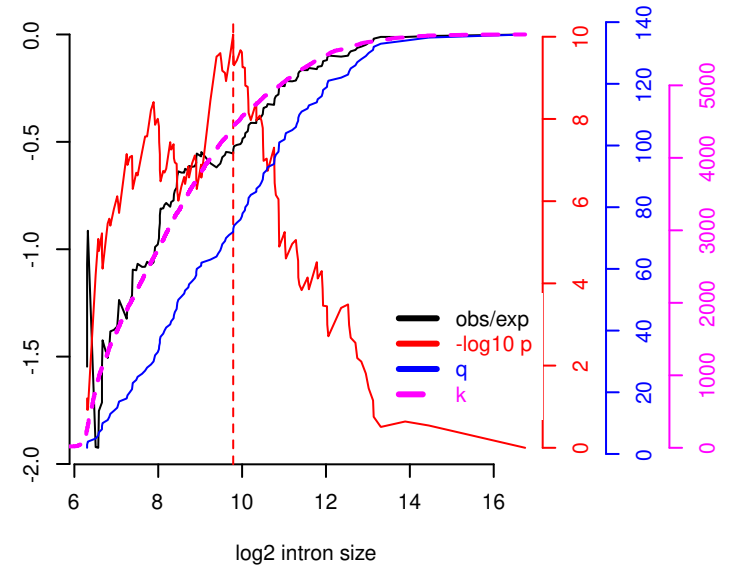

GO:0001012 RNA polymerase II regulatory region DNA binding

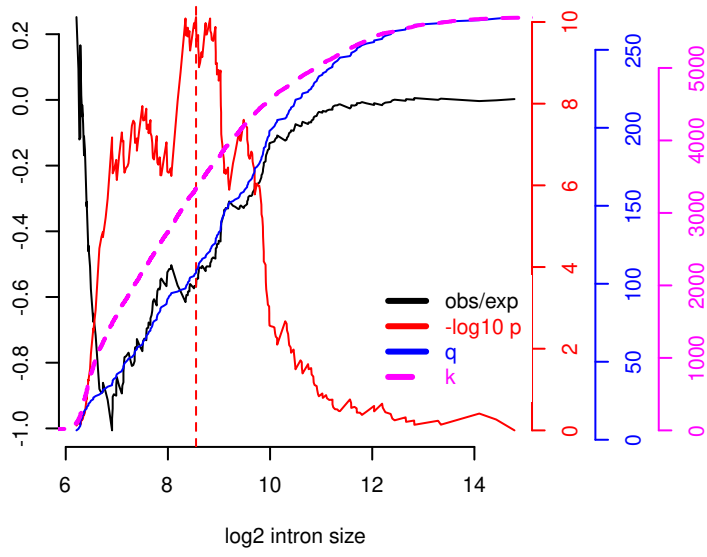

GO:0008092 cytoskeletal protein binding

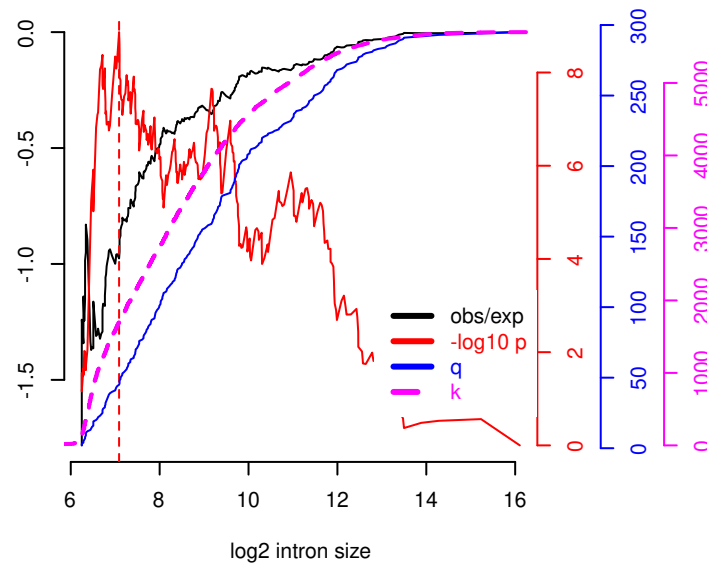

GO:0001067 regulatory region nucleic acid binding

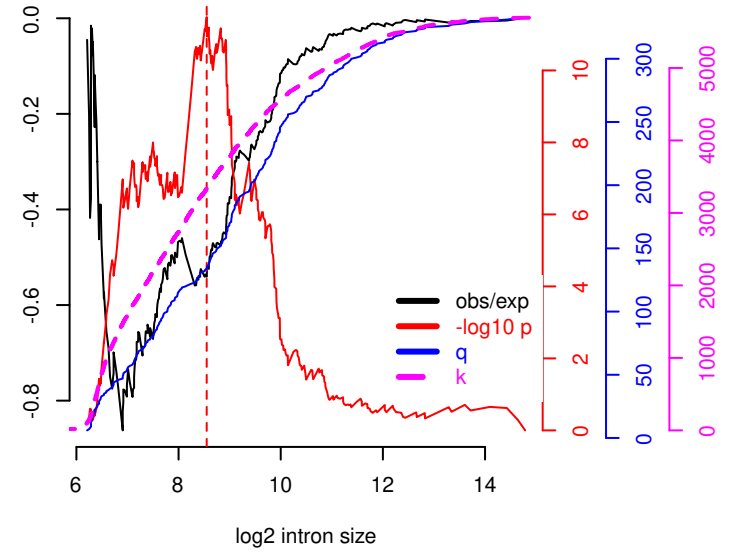

GO:0044212 transcription regulatory region DNA binding

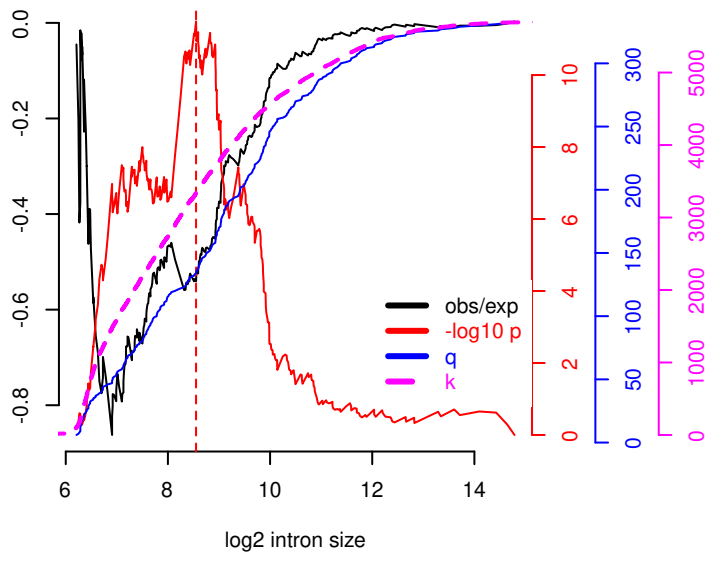

GO:0000977 RNA polymerase II regulatory region sequence-specific DNA binding

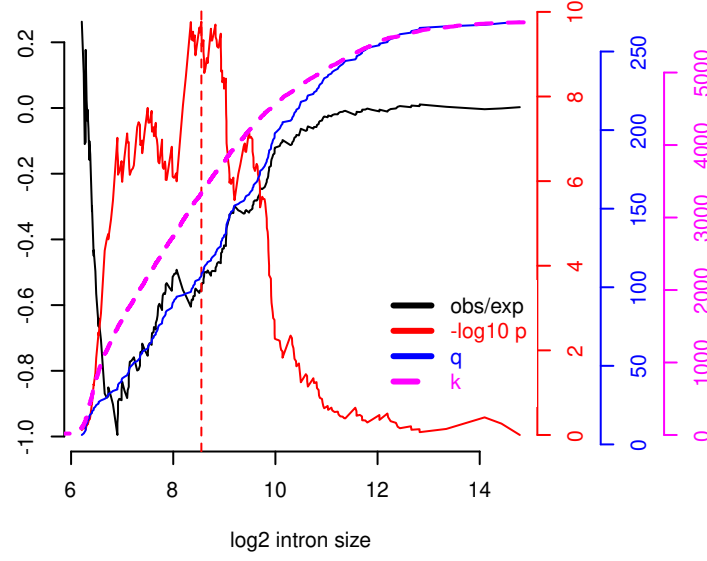



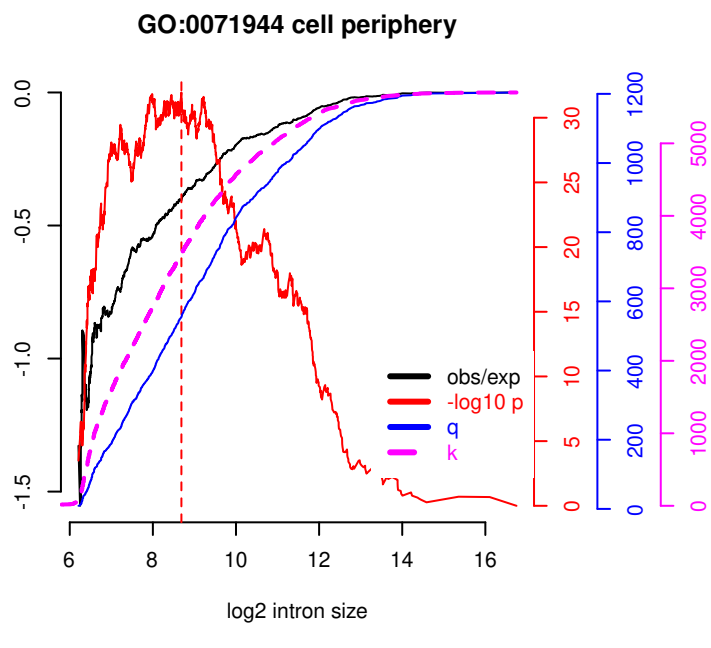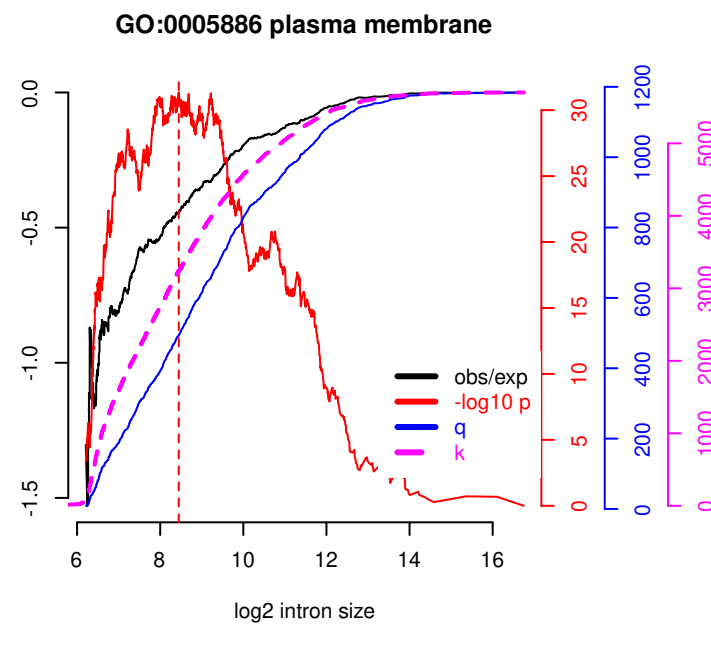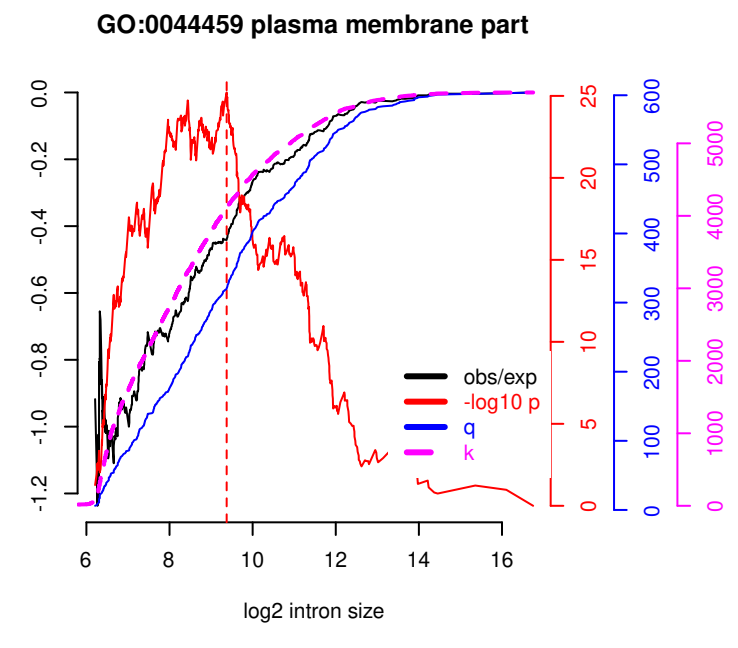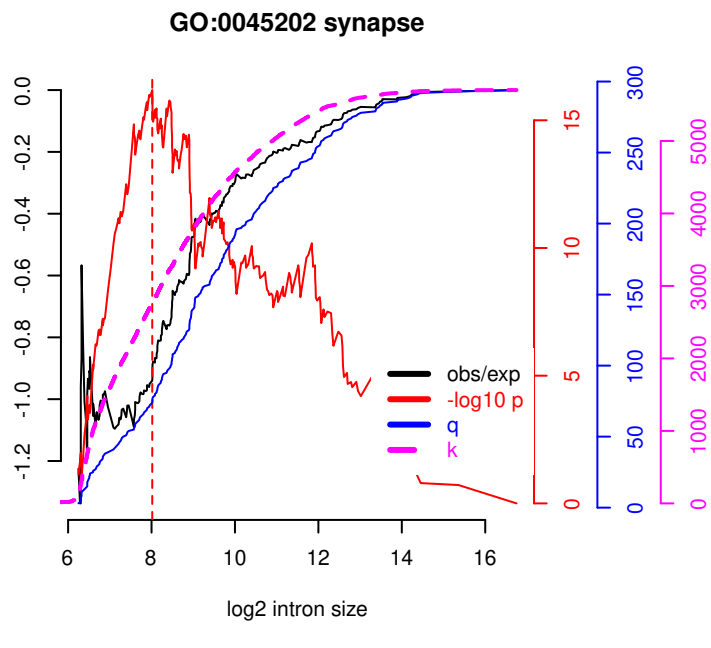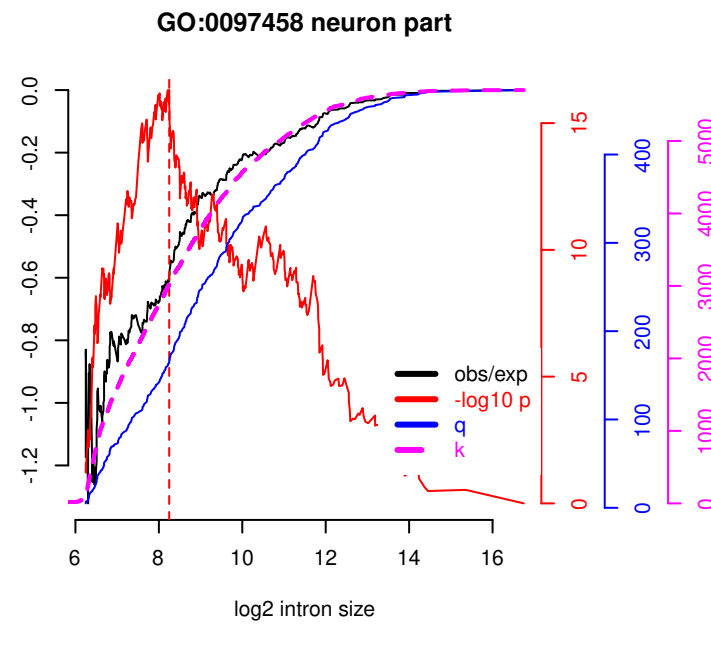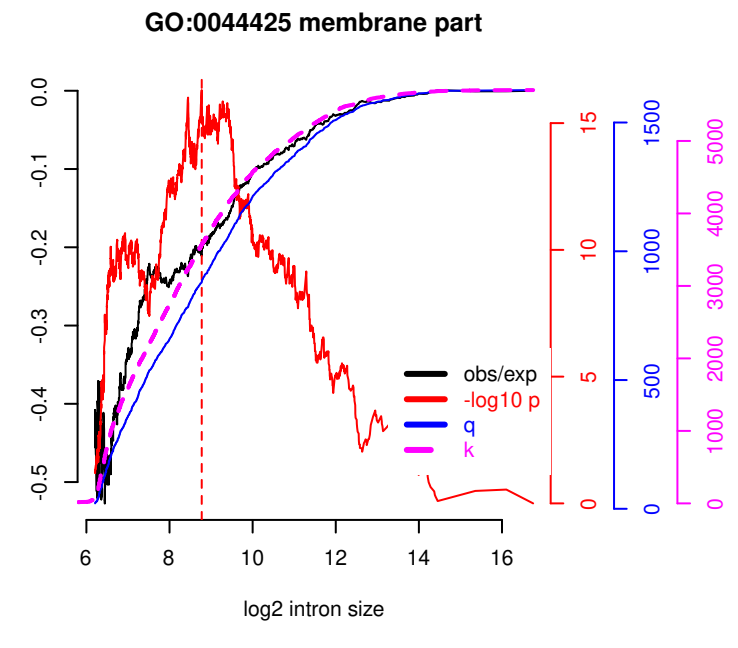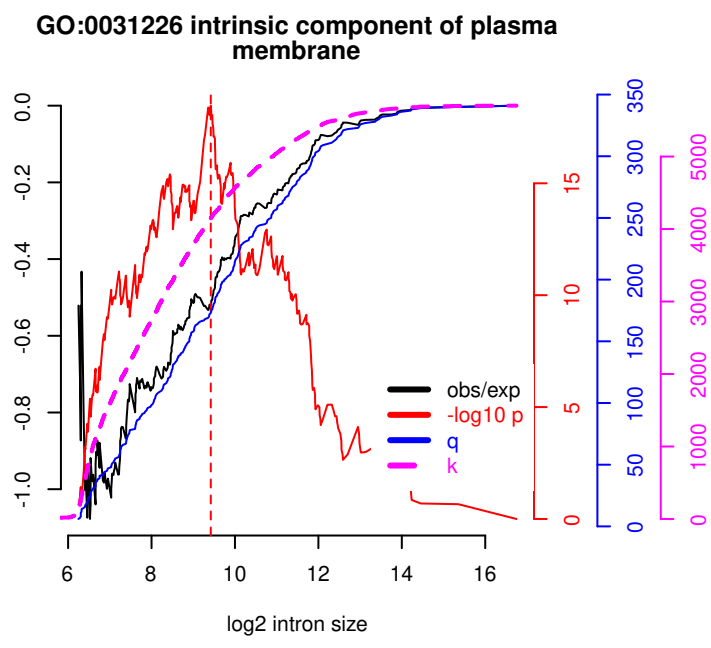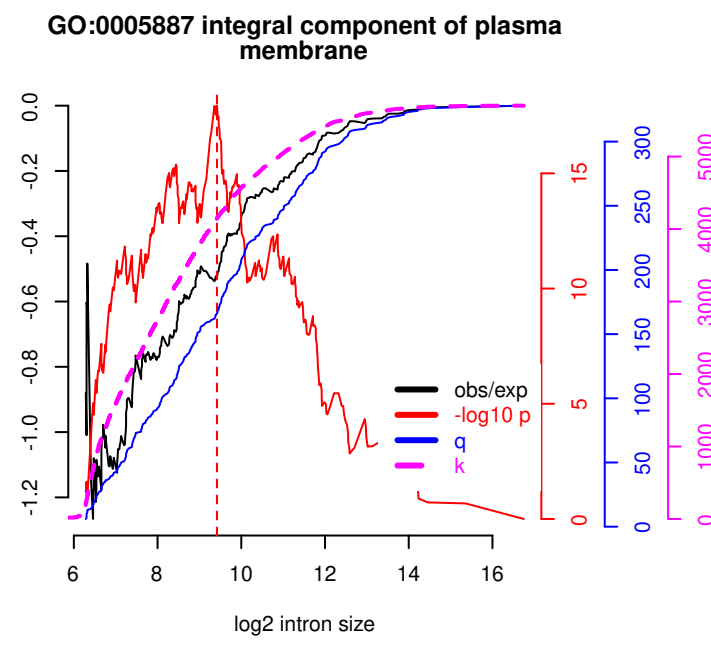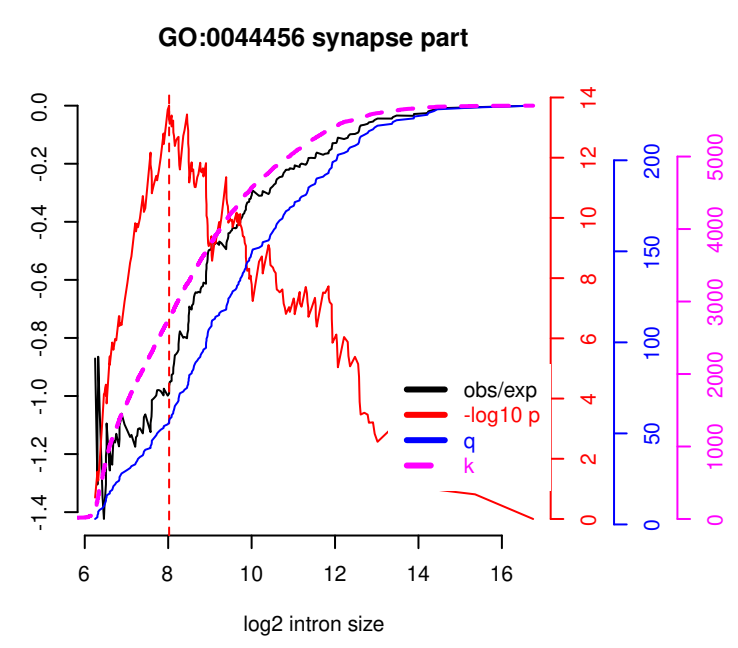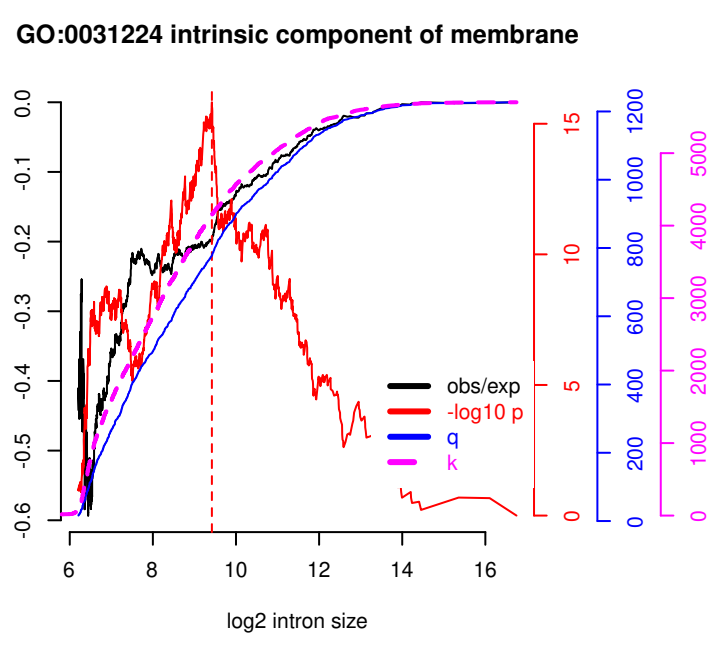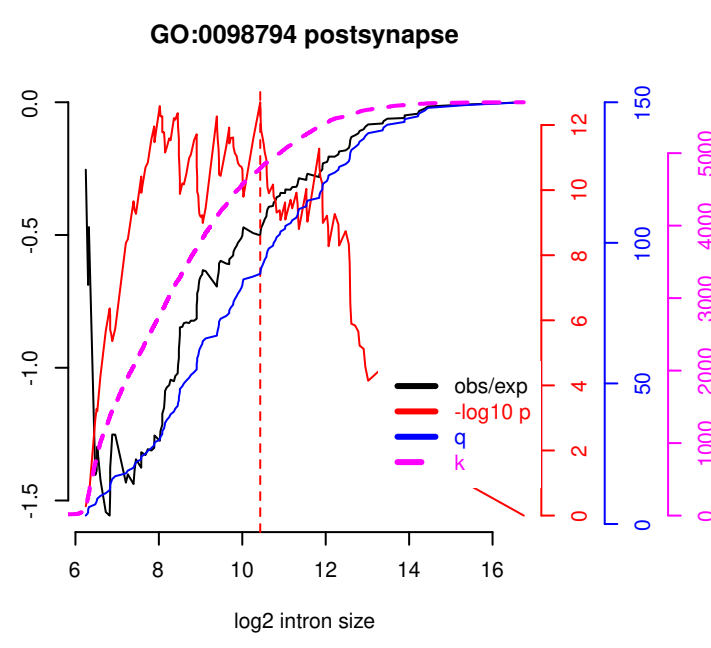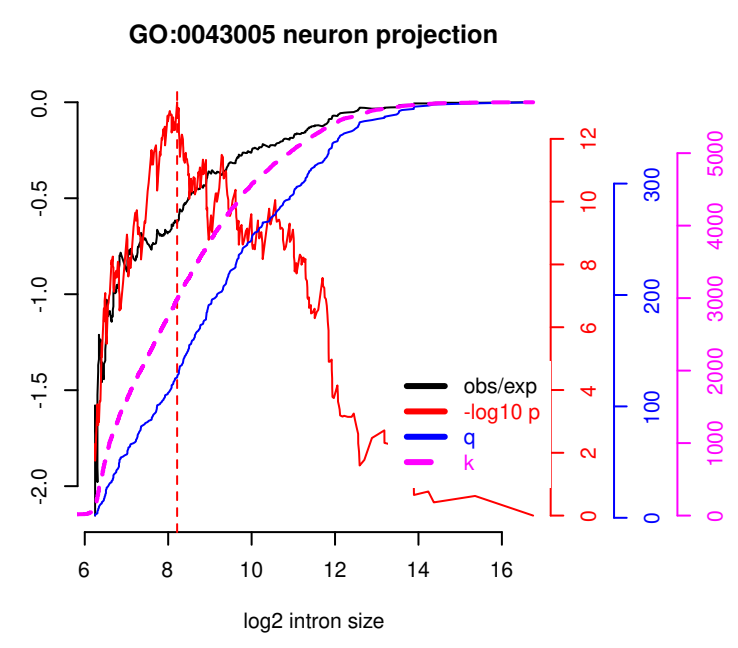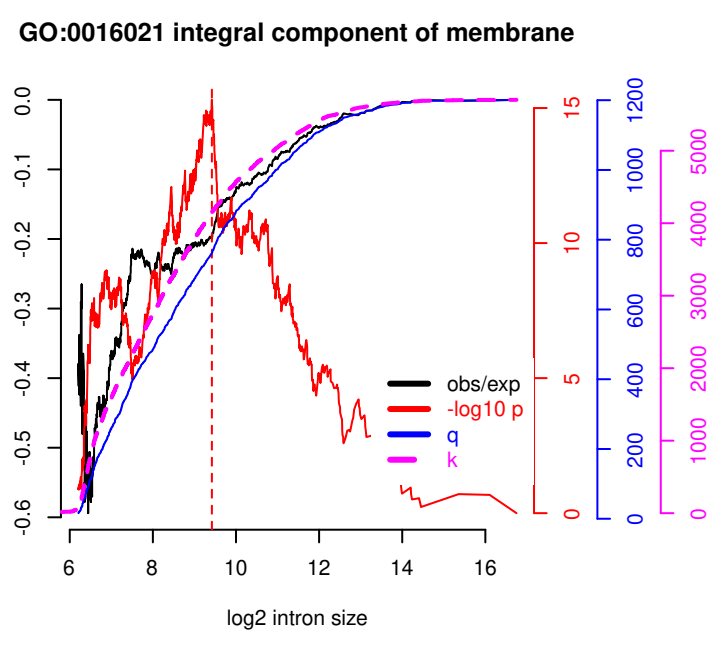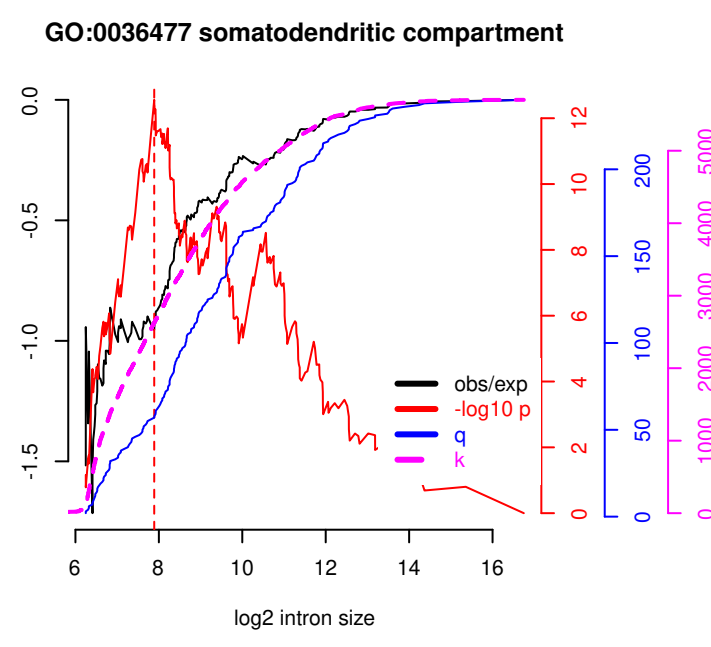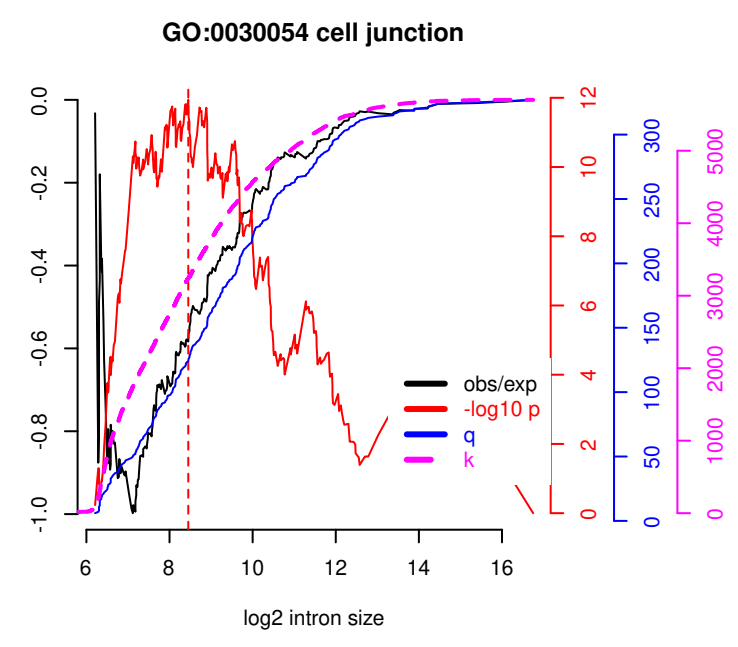

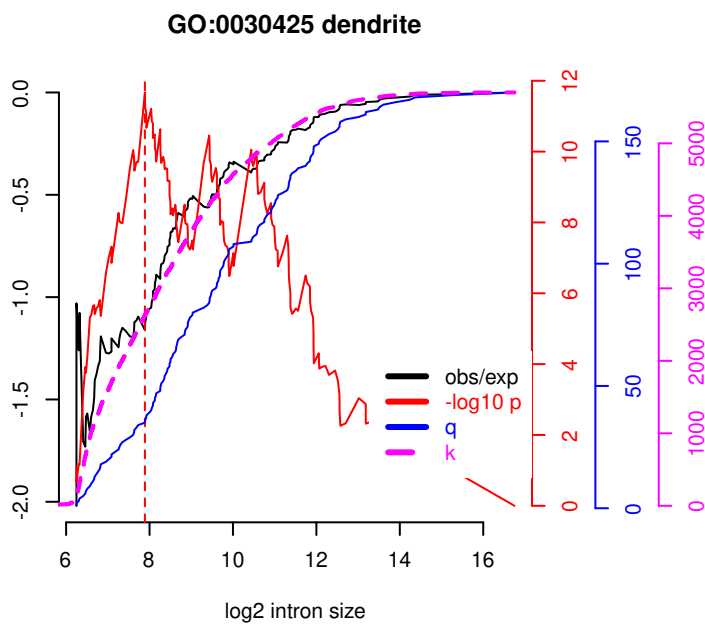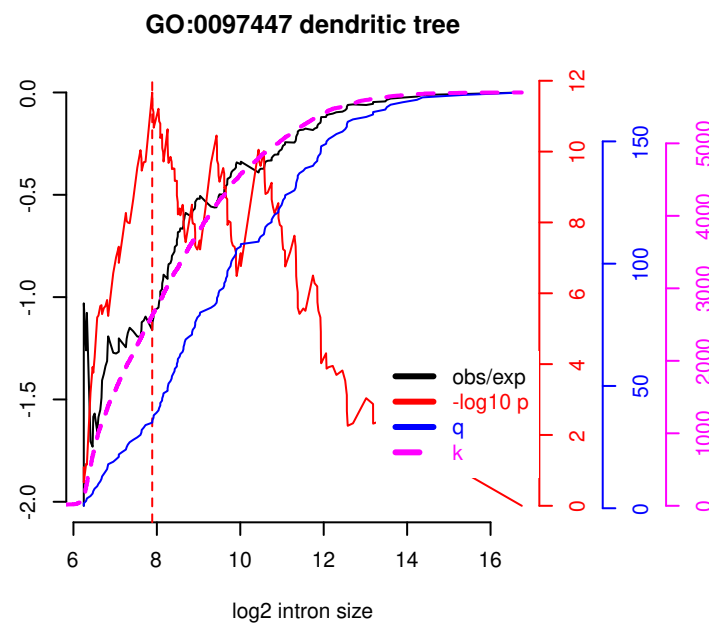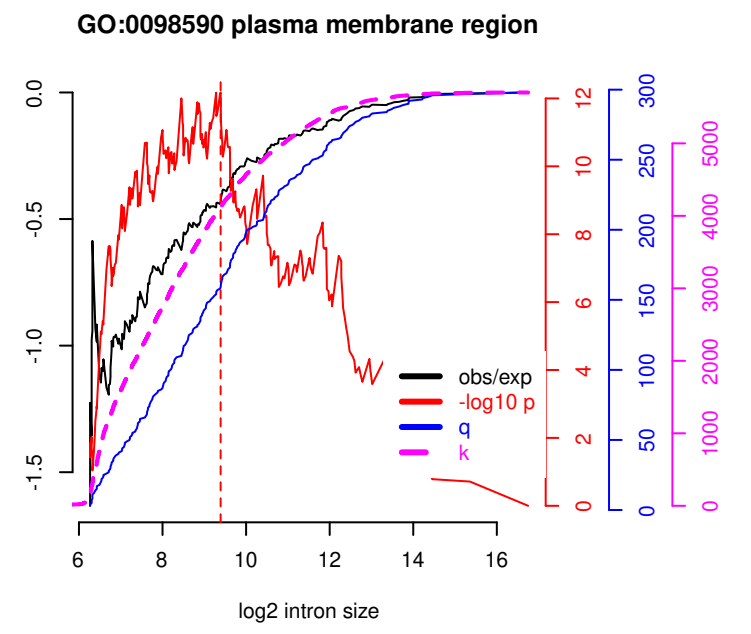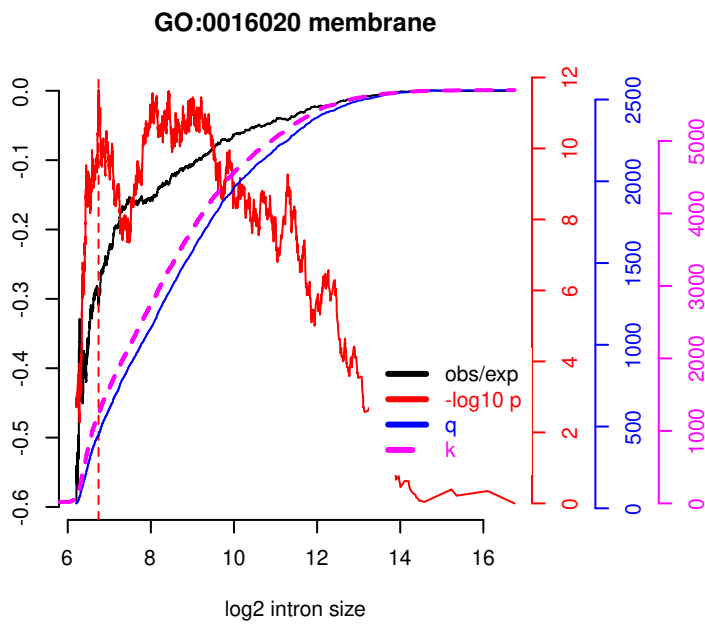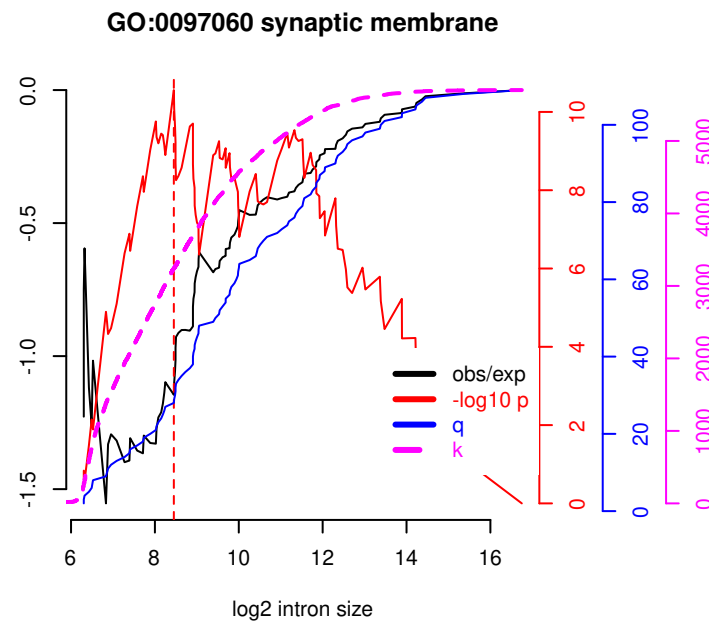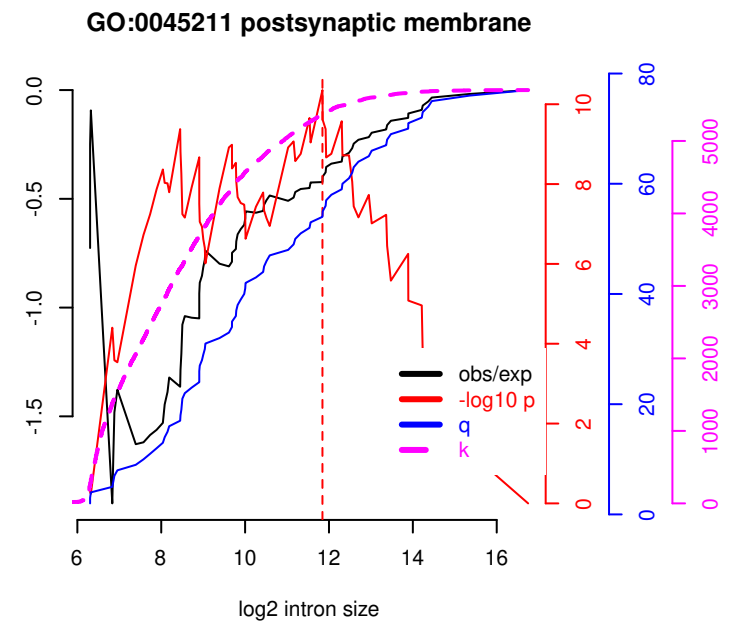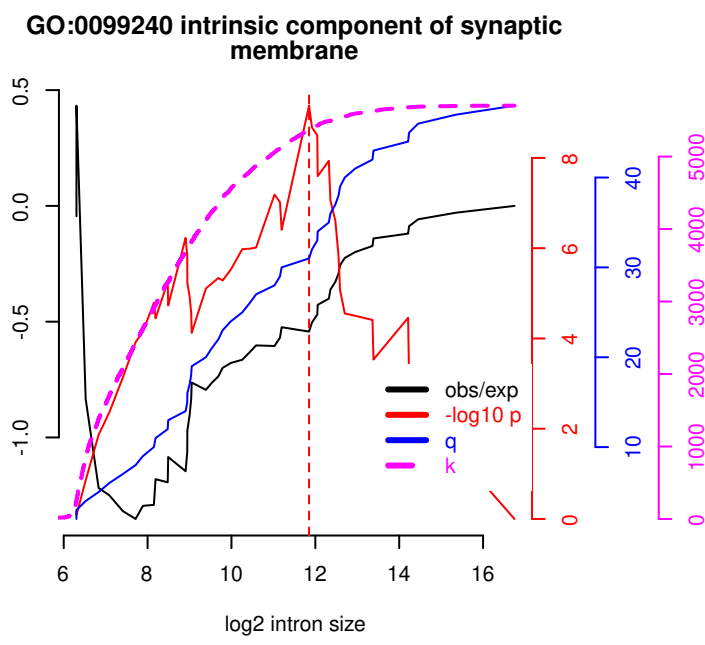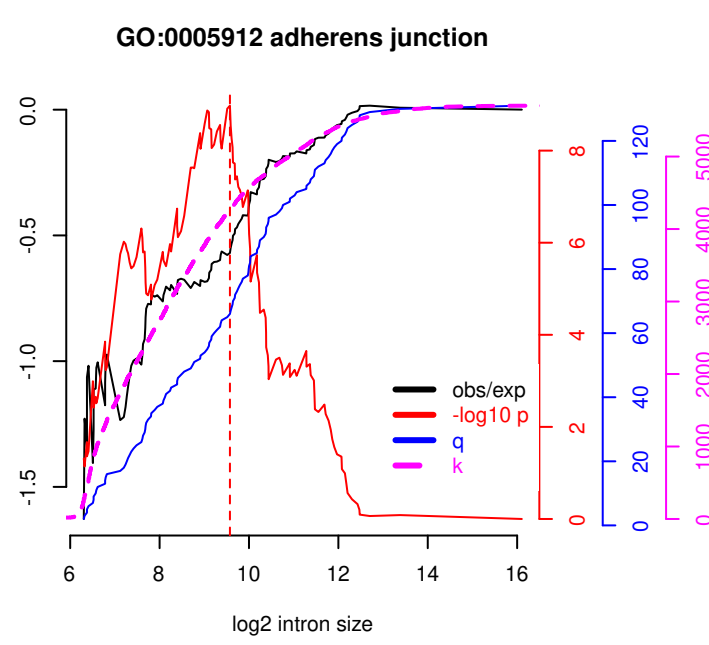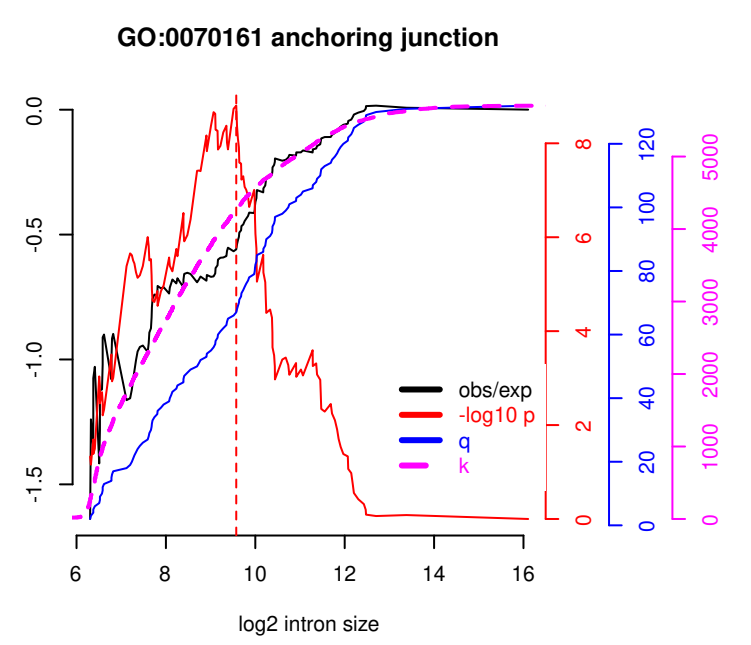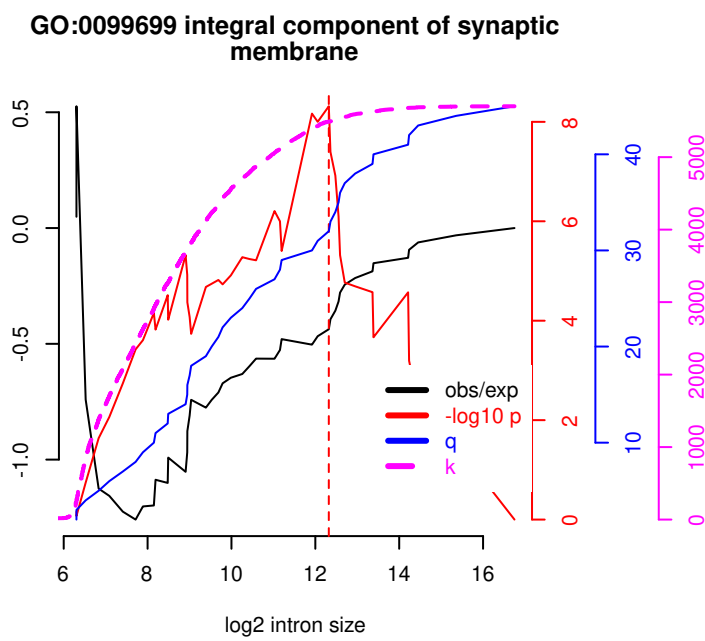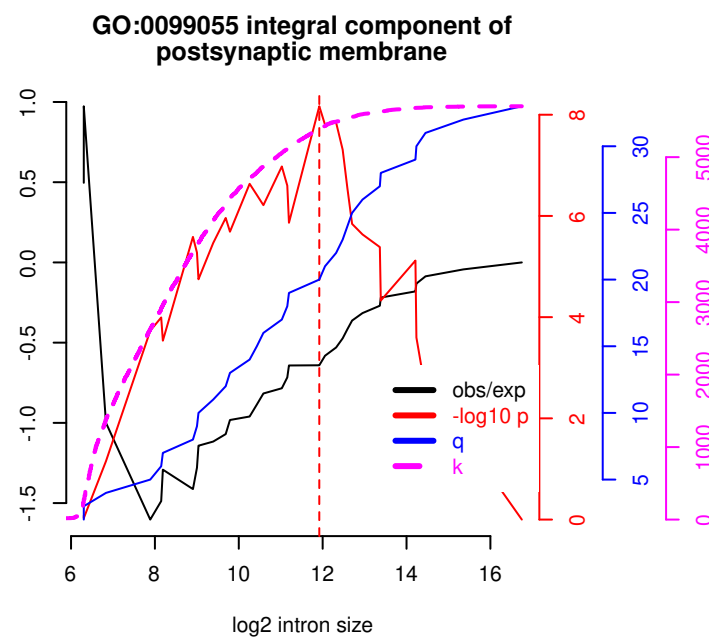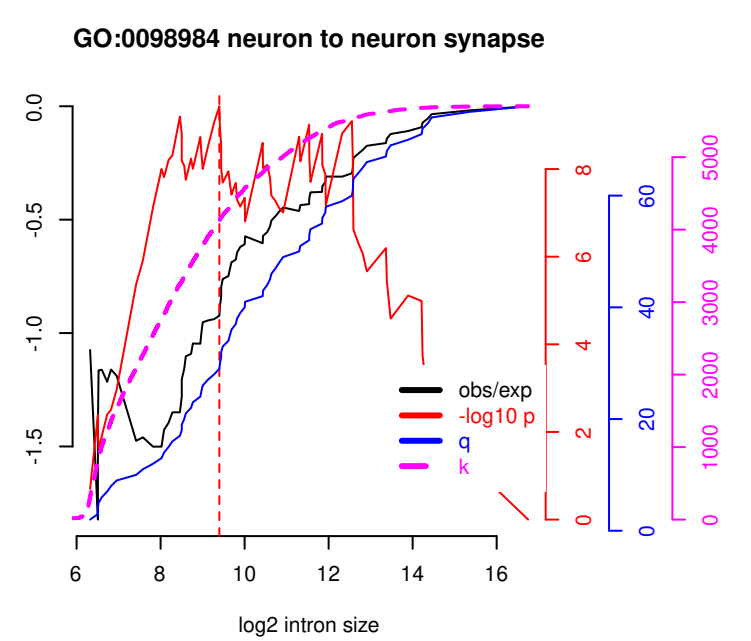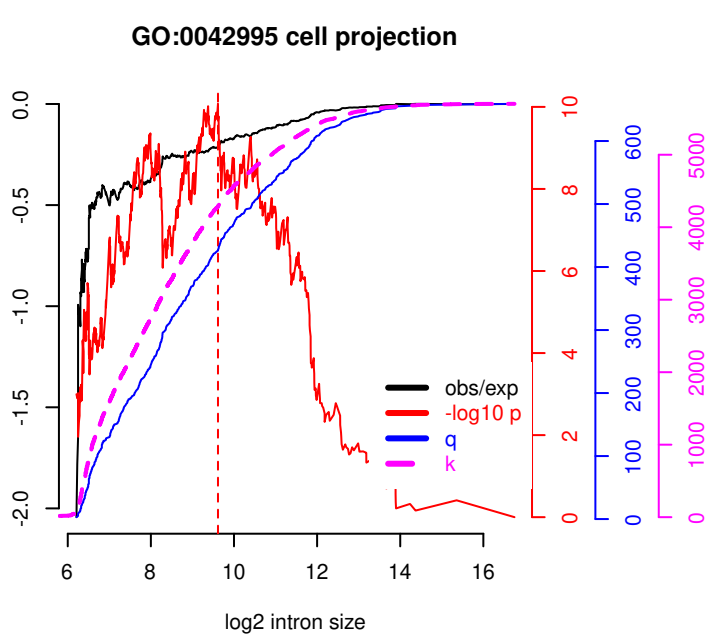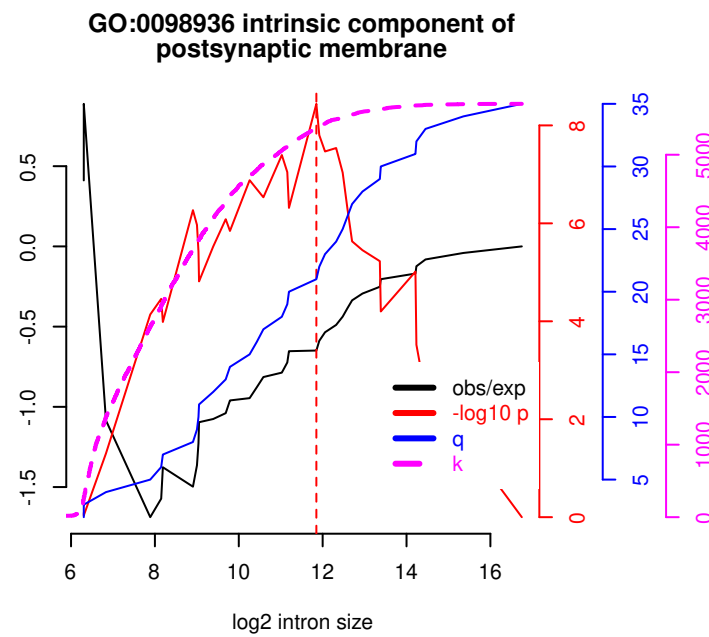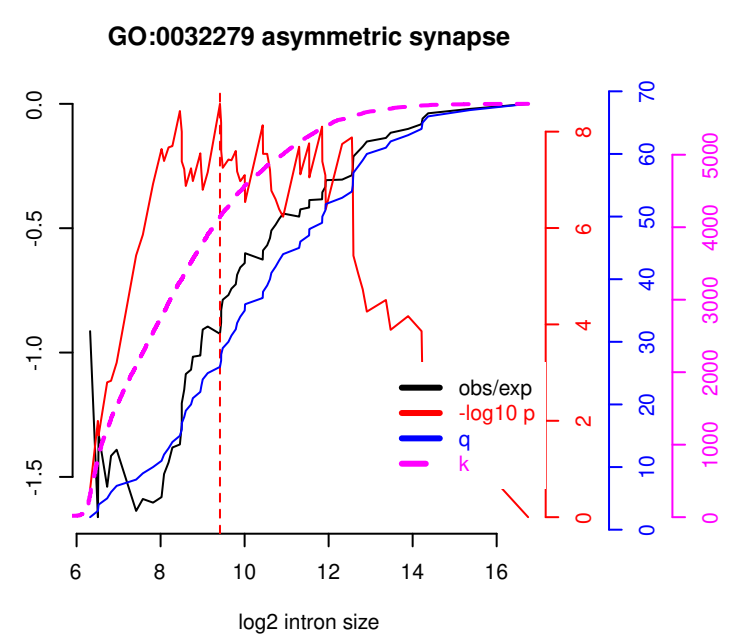

GO:0099572 postsynaptic specialization

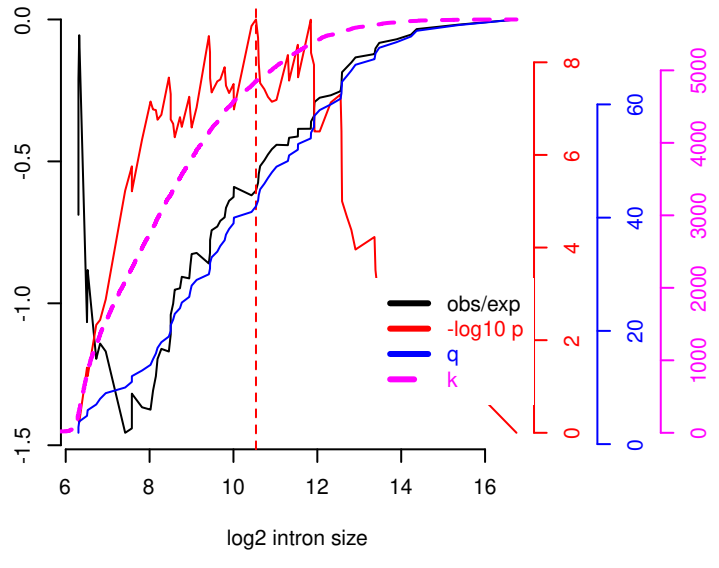

Supplement: 12864_2022_8760_MOESM3_ESM.pdf [file 12864_2022_8760_MOESM3_ESM.pdf]
