# Supplementary material for: Intron size minimisation in teleosts
Source: PubMed Central journal article supplement (PMC9438311; doi:10.1186/s12864-022-08760-w), 2022-09-01

Teleostei  
Sauria  
Aves  
Mammalia  
Eutheria  
Others

4.3e+03  
1.0e+03  
2.5e+02  
6.2e+01  
1.6e+01

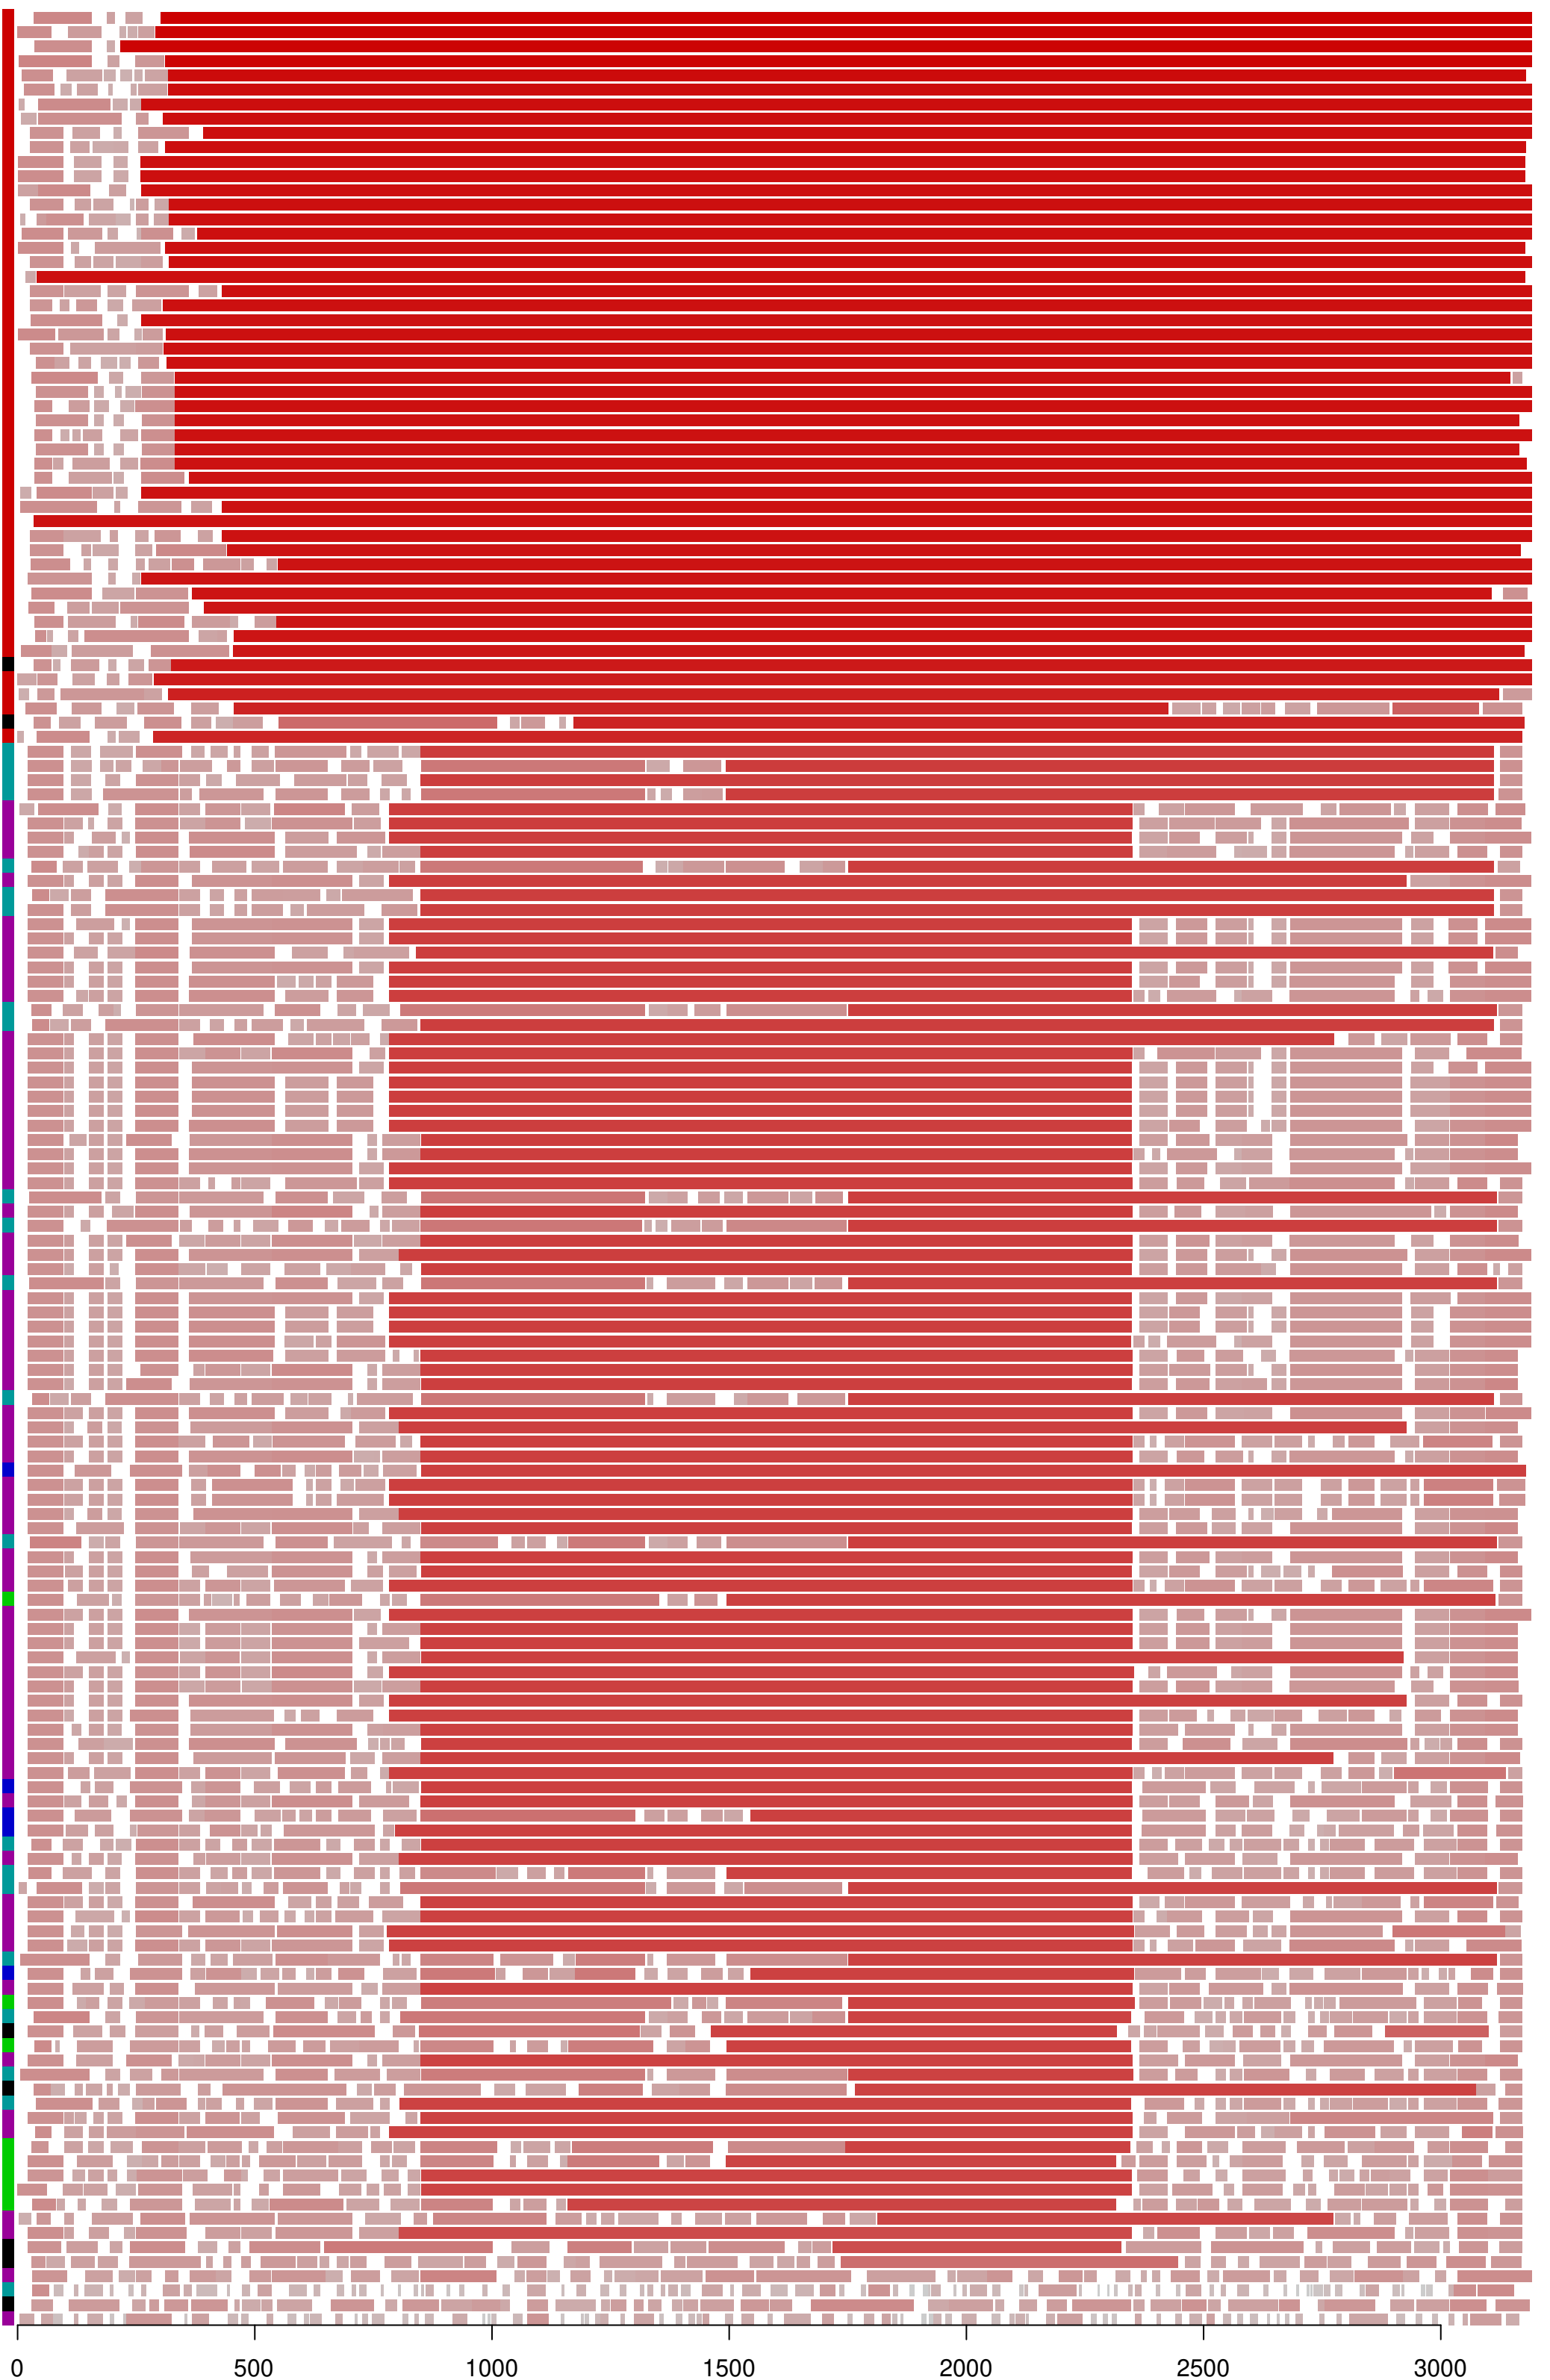

0 alignments above max size (1.0e+08)

Teleostei  
Sauria  
Aves  
Mammalia  
Eutheria  
Others

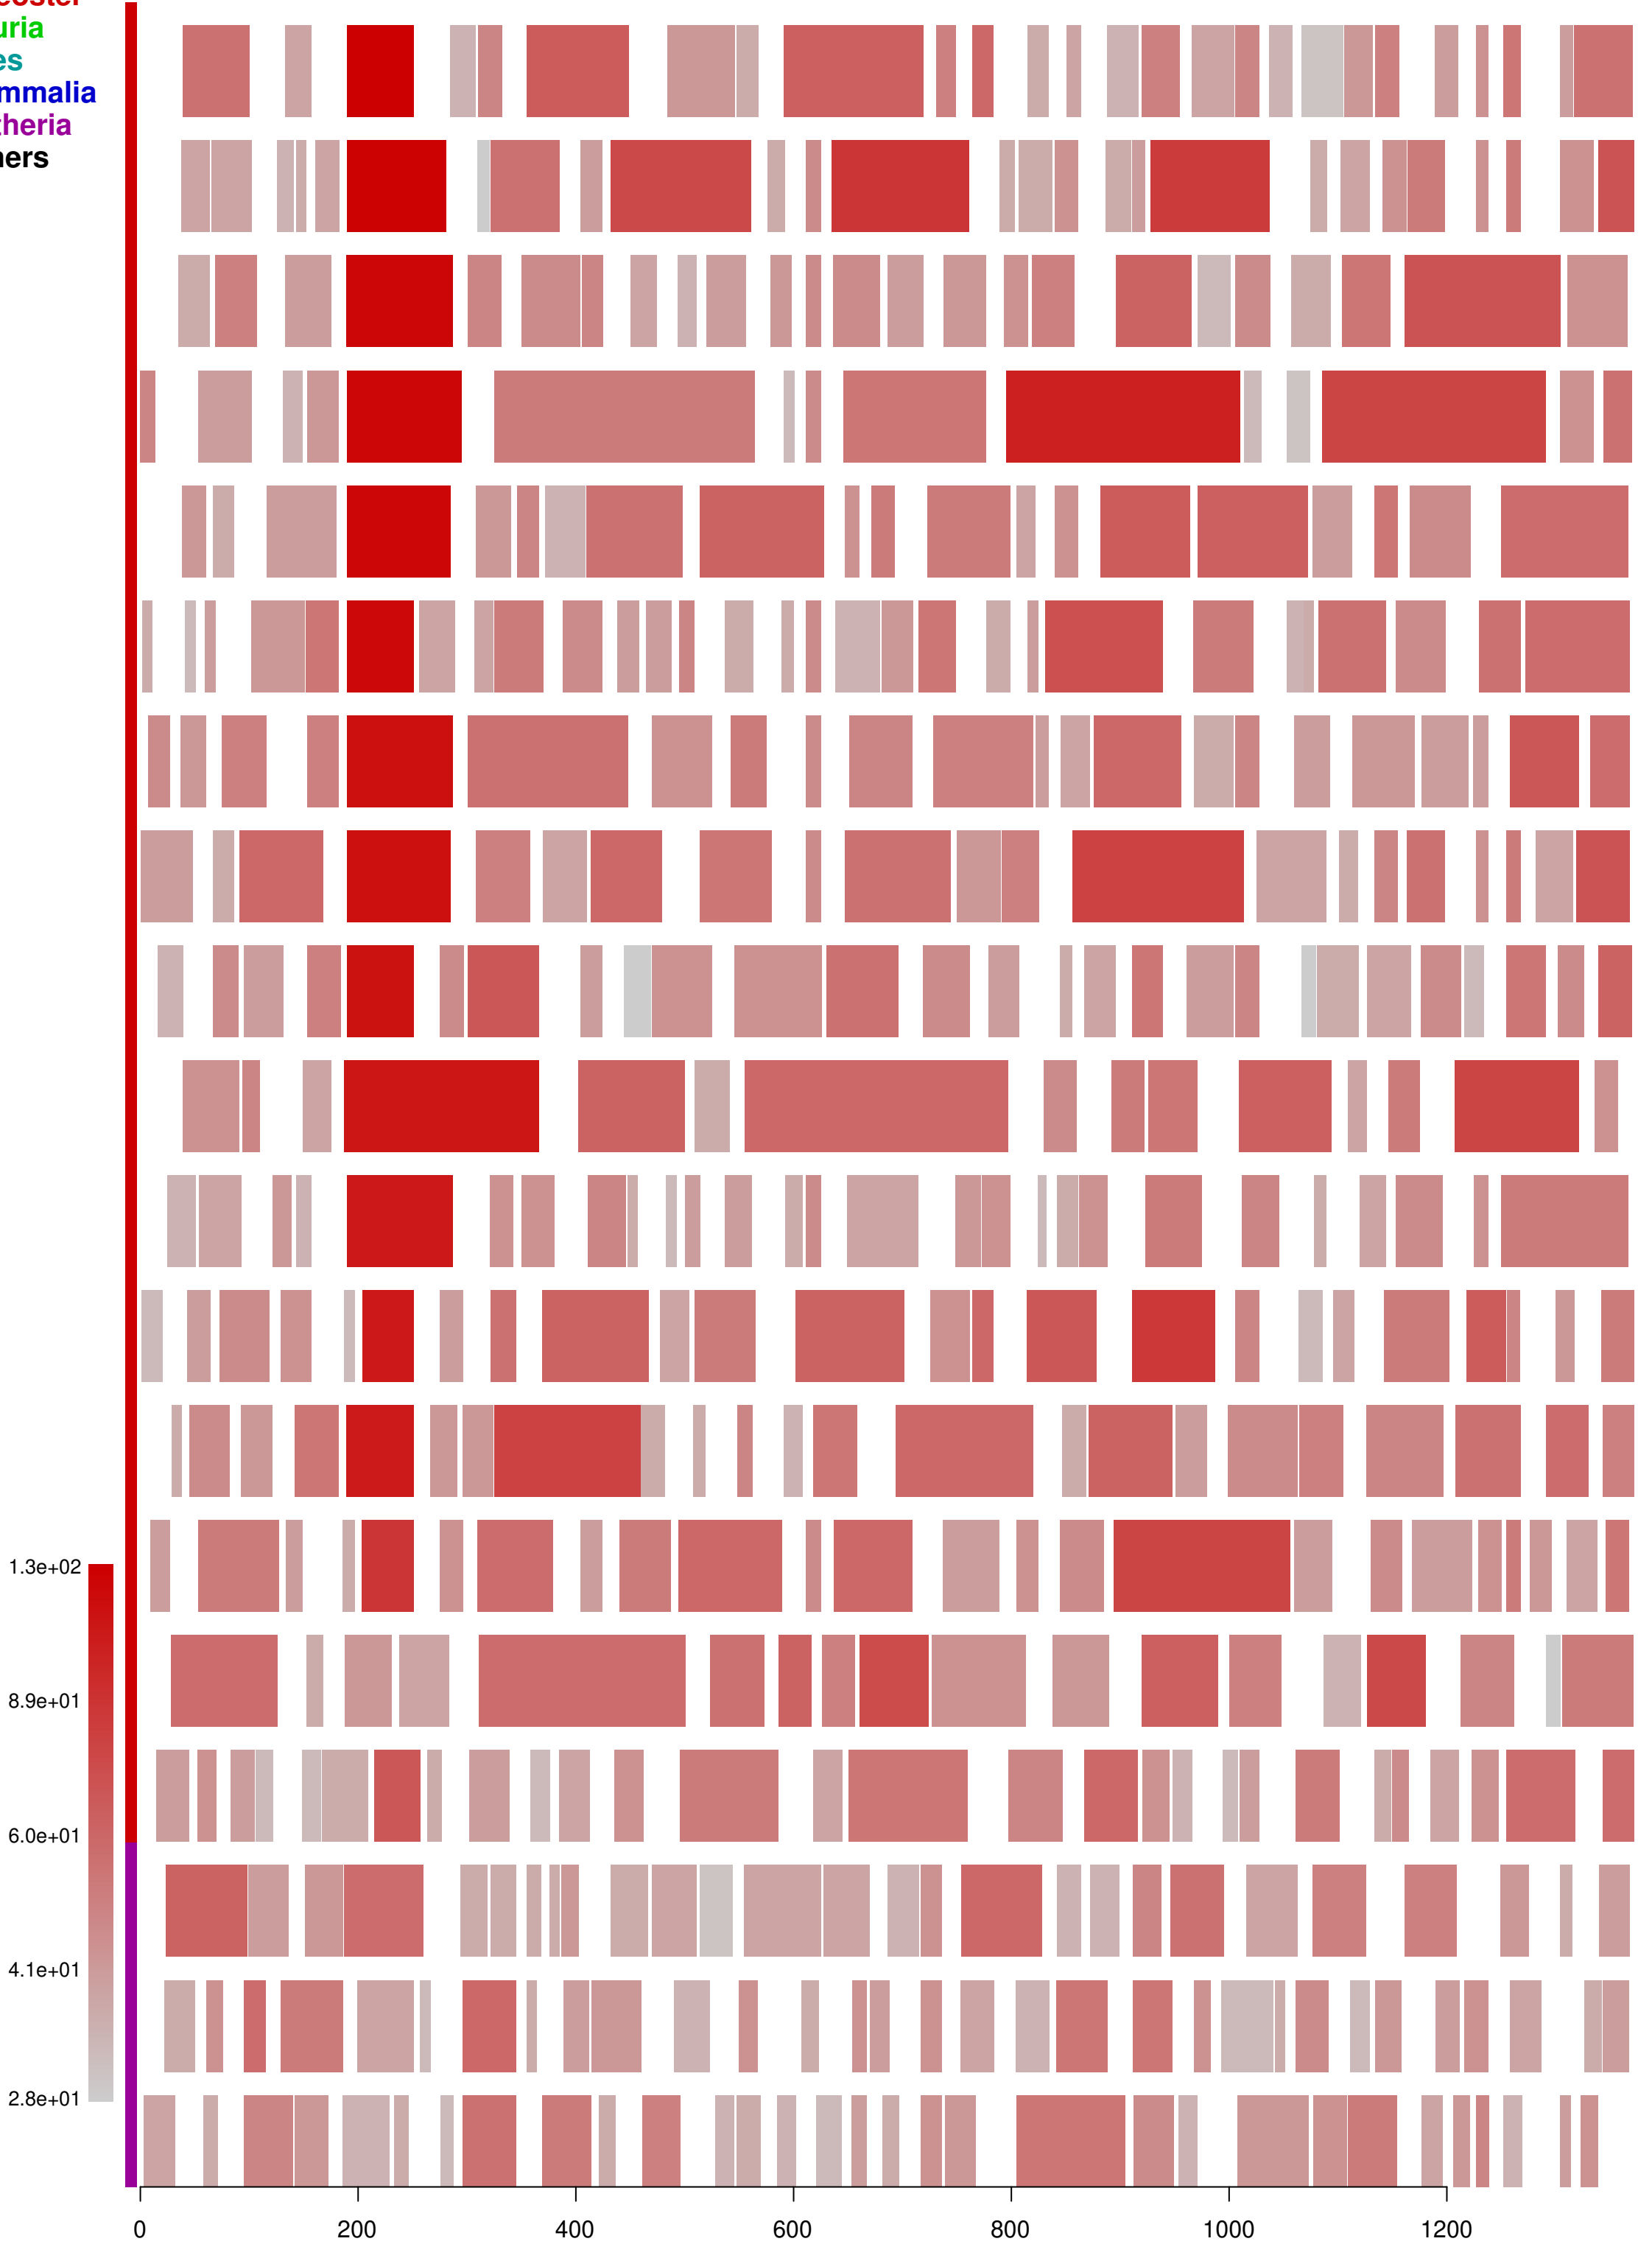

0 alignments above max size (1.0e+08)

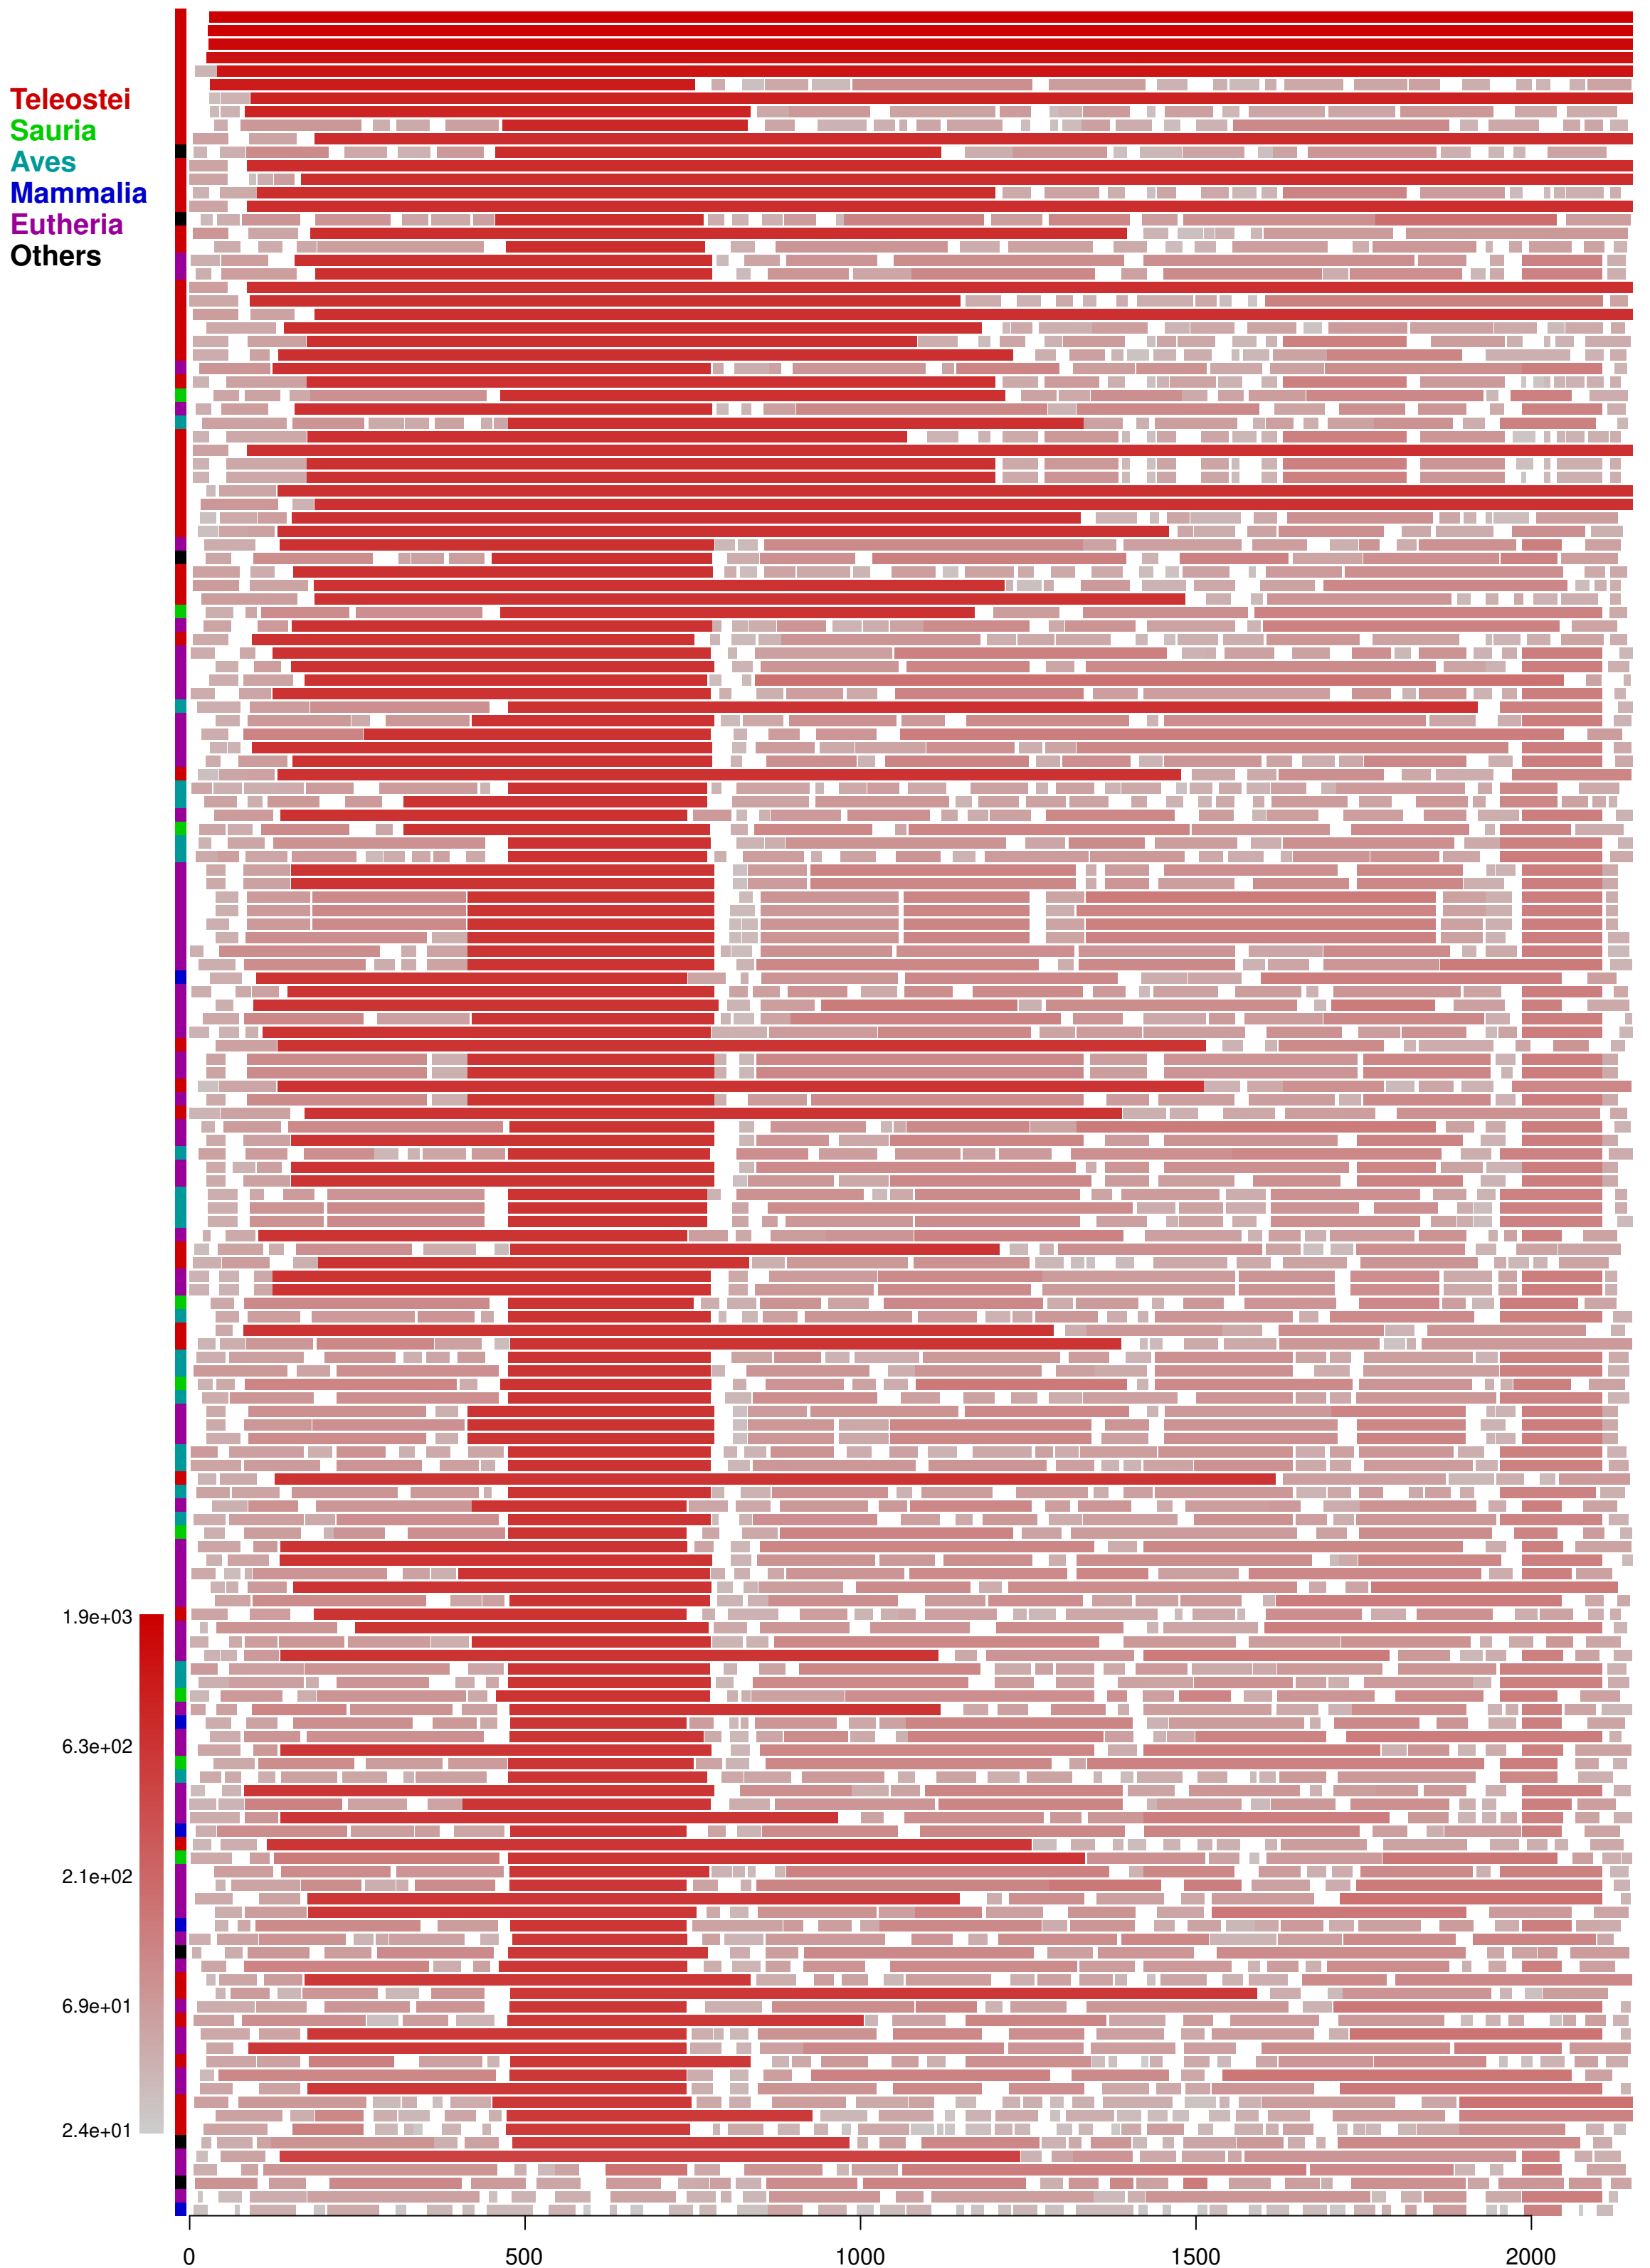

0 alignments above max size (1.0e+08)

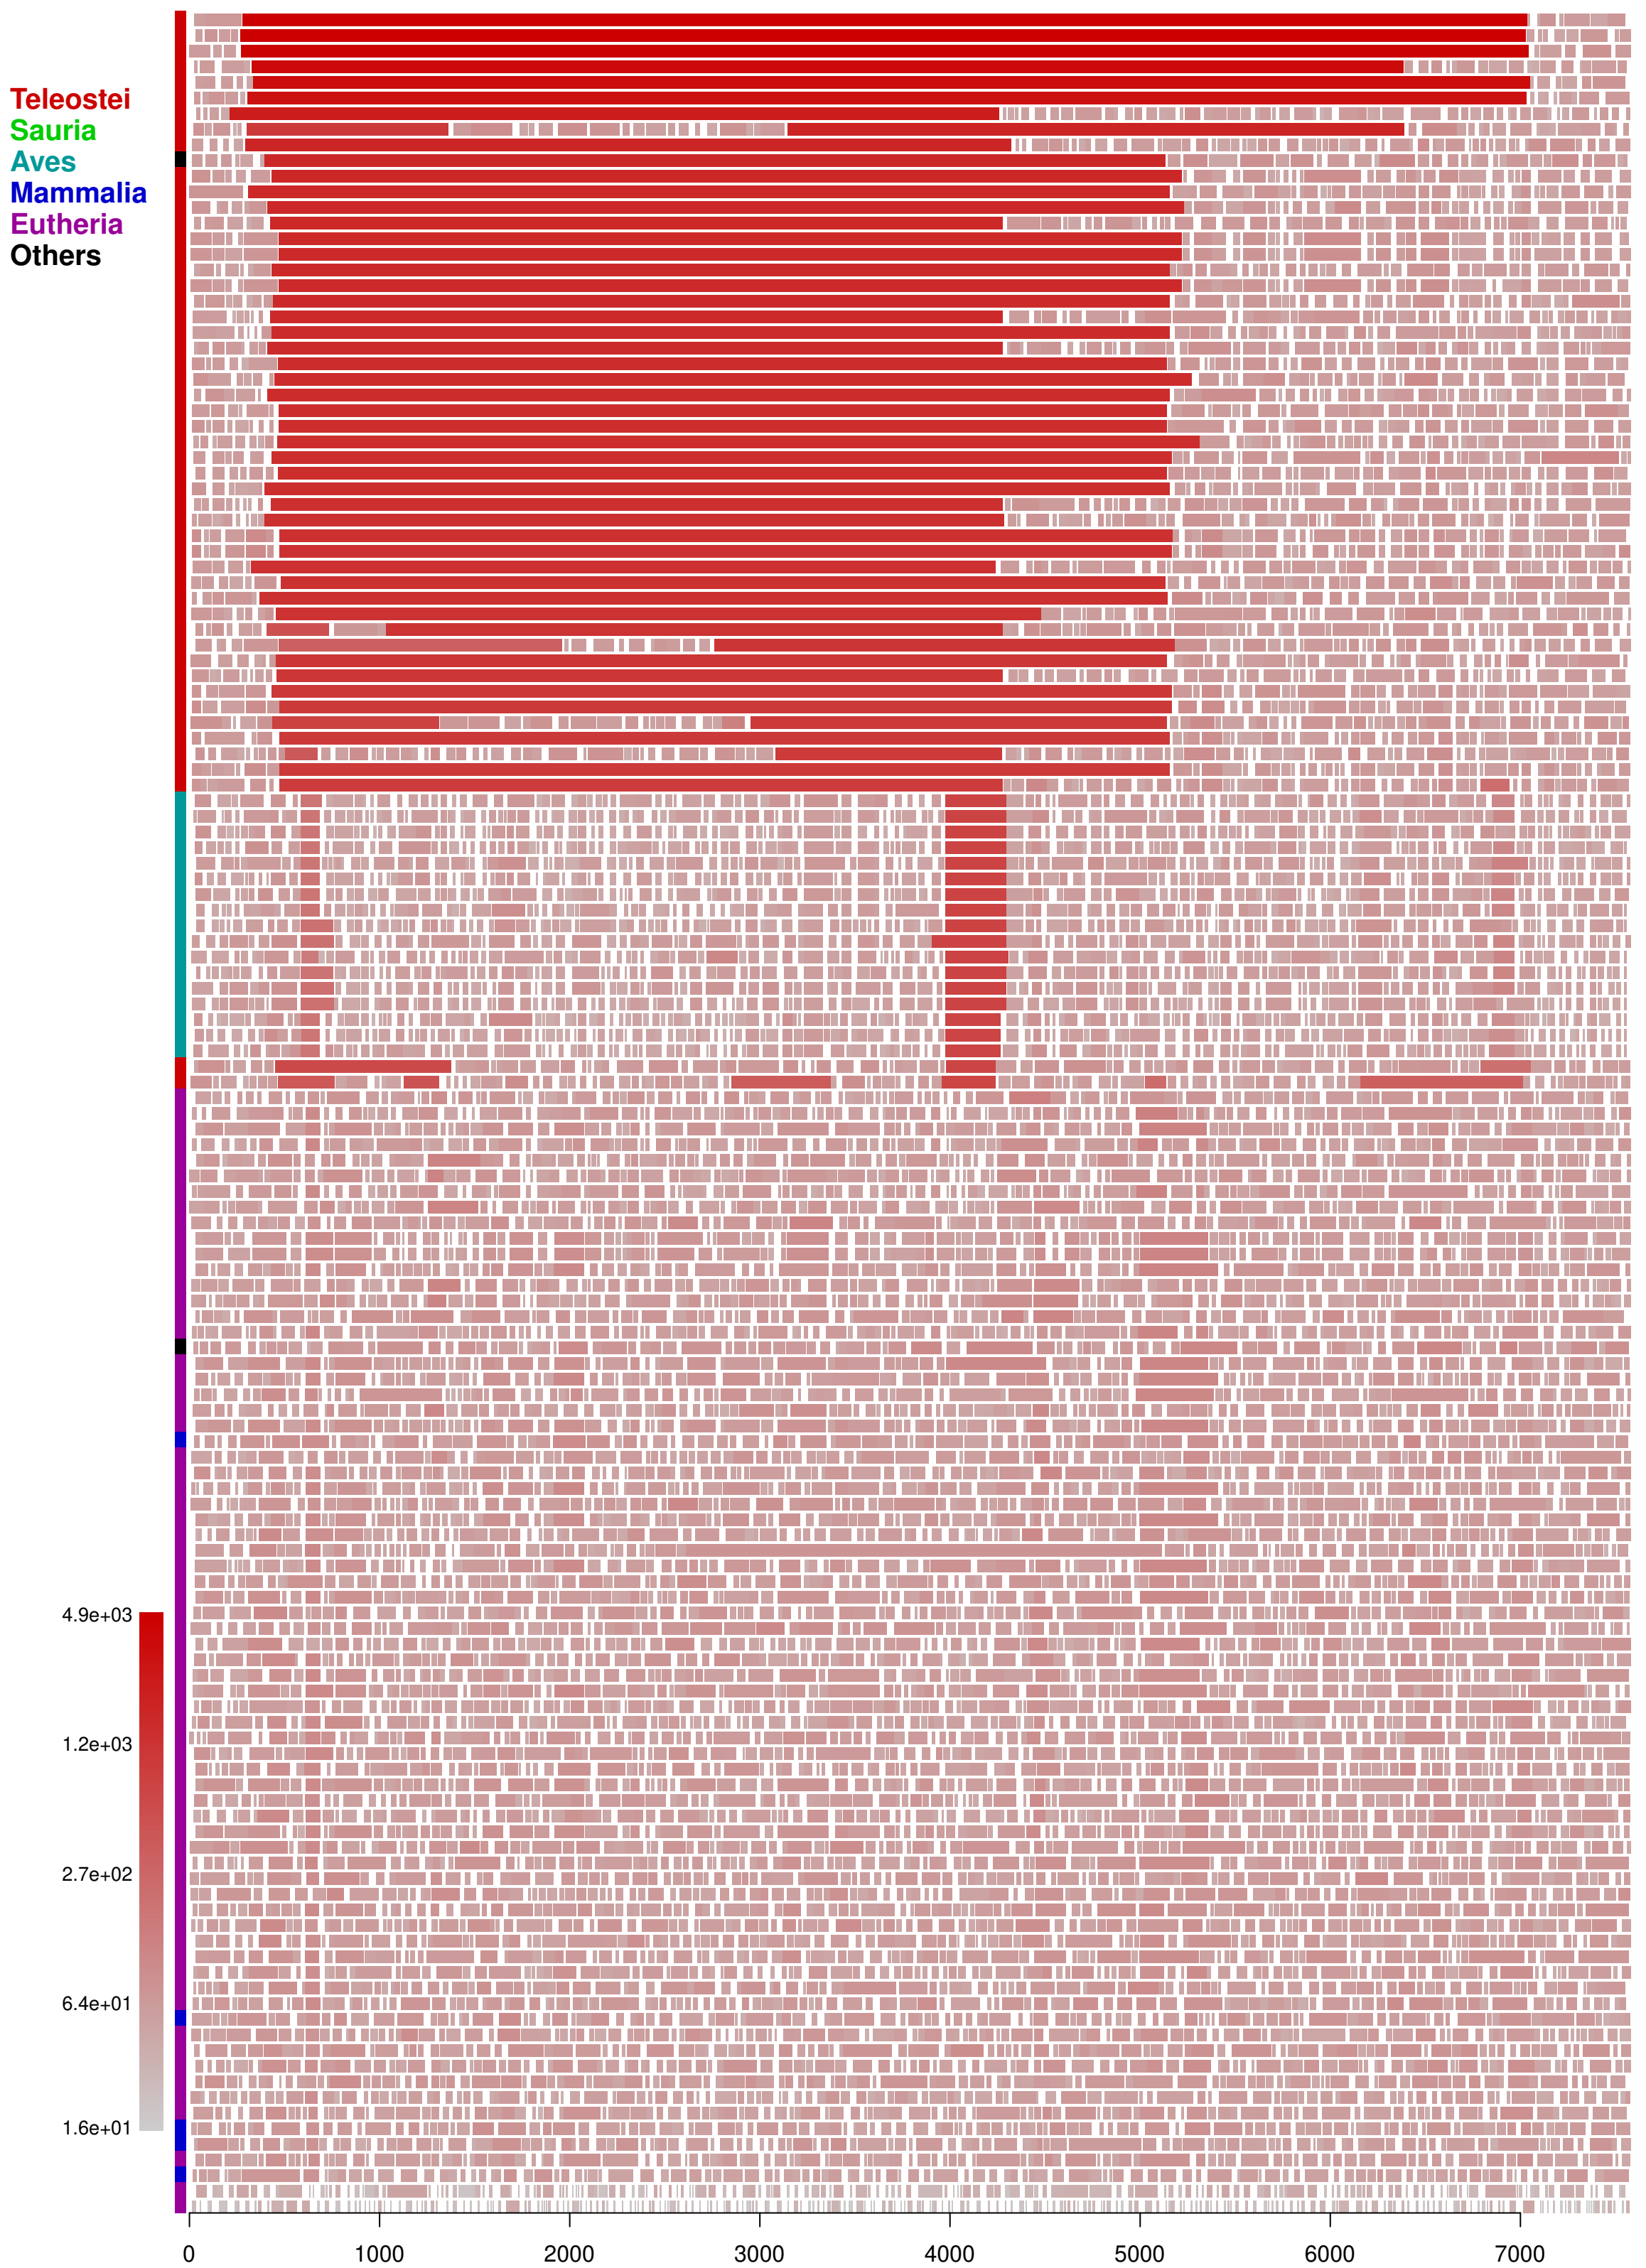

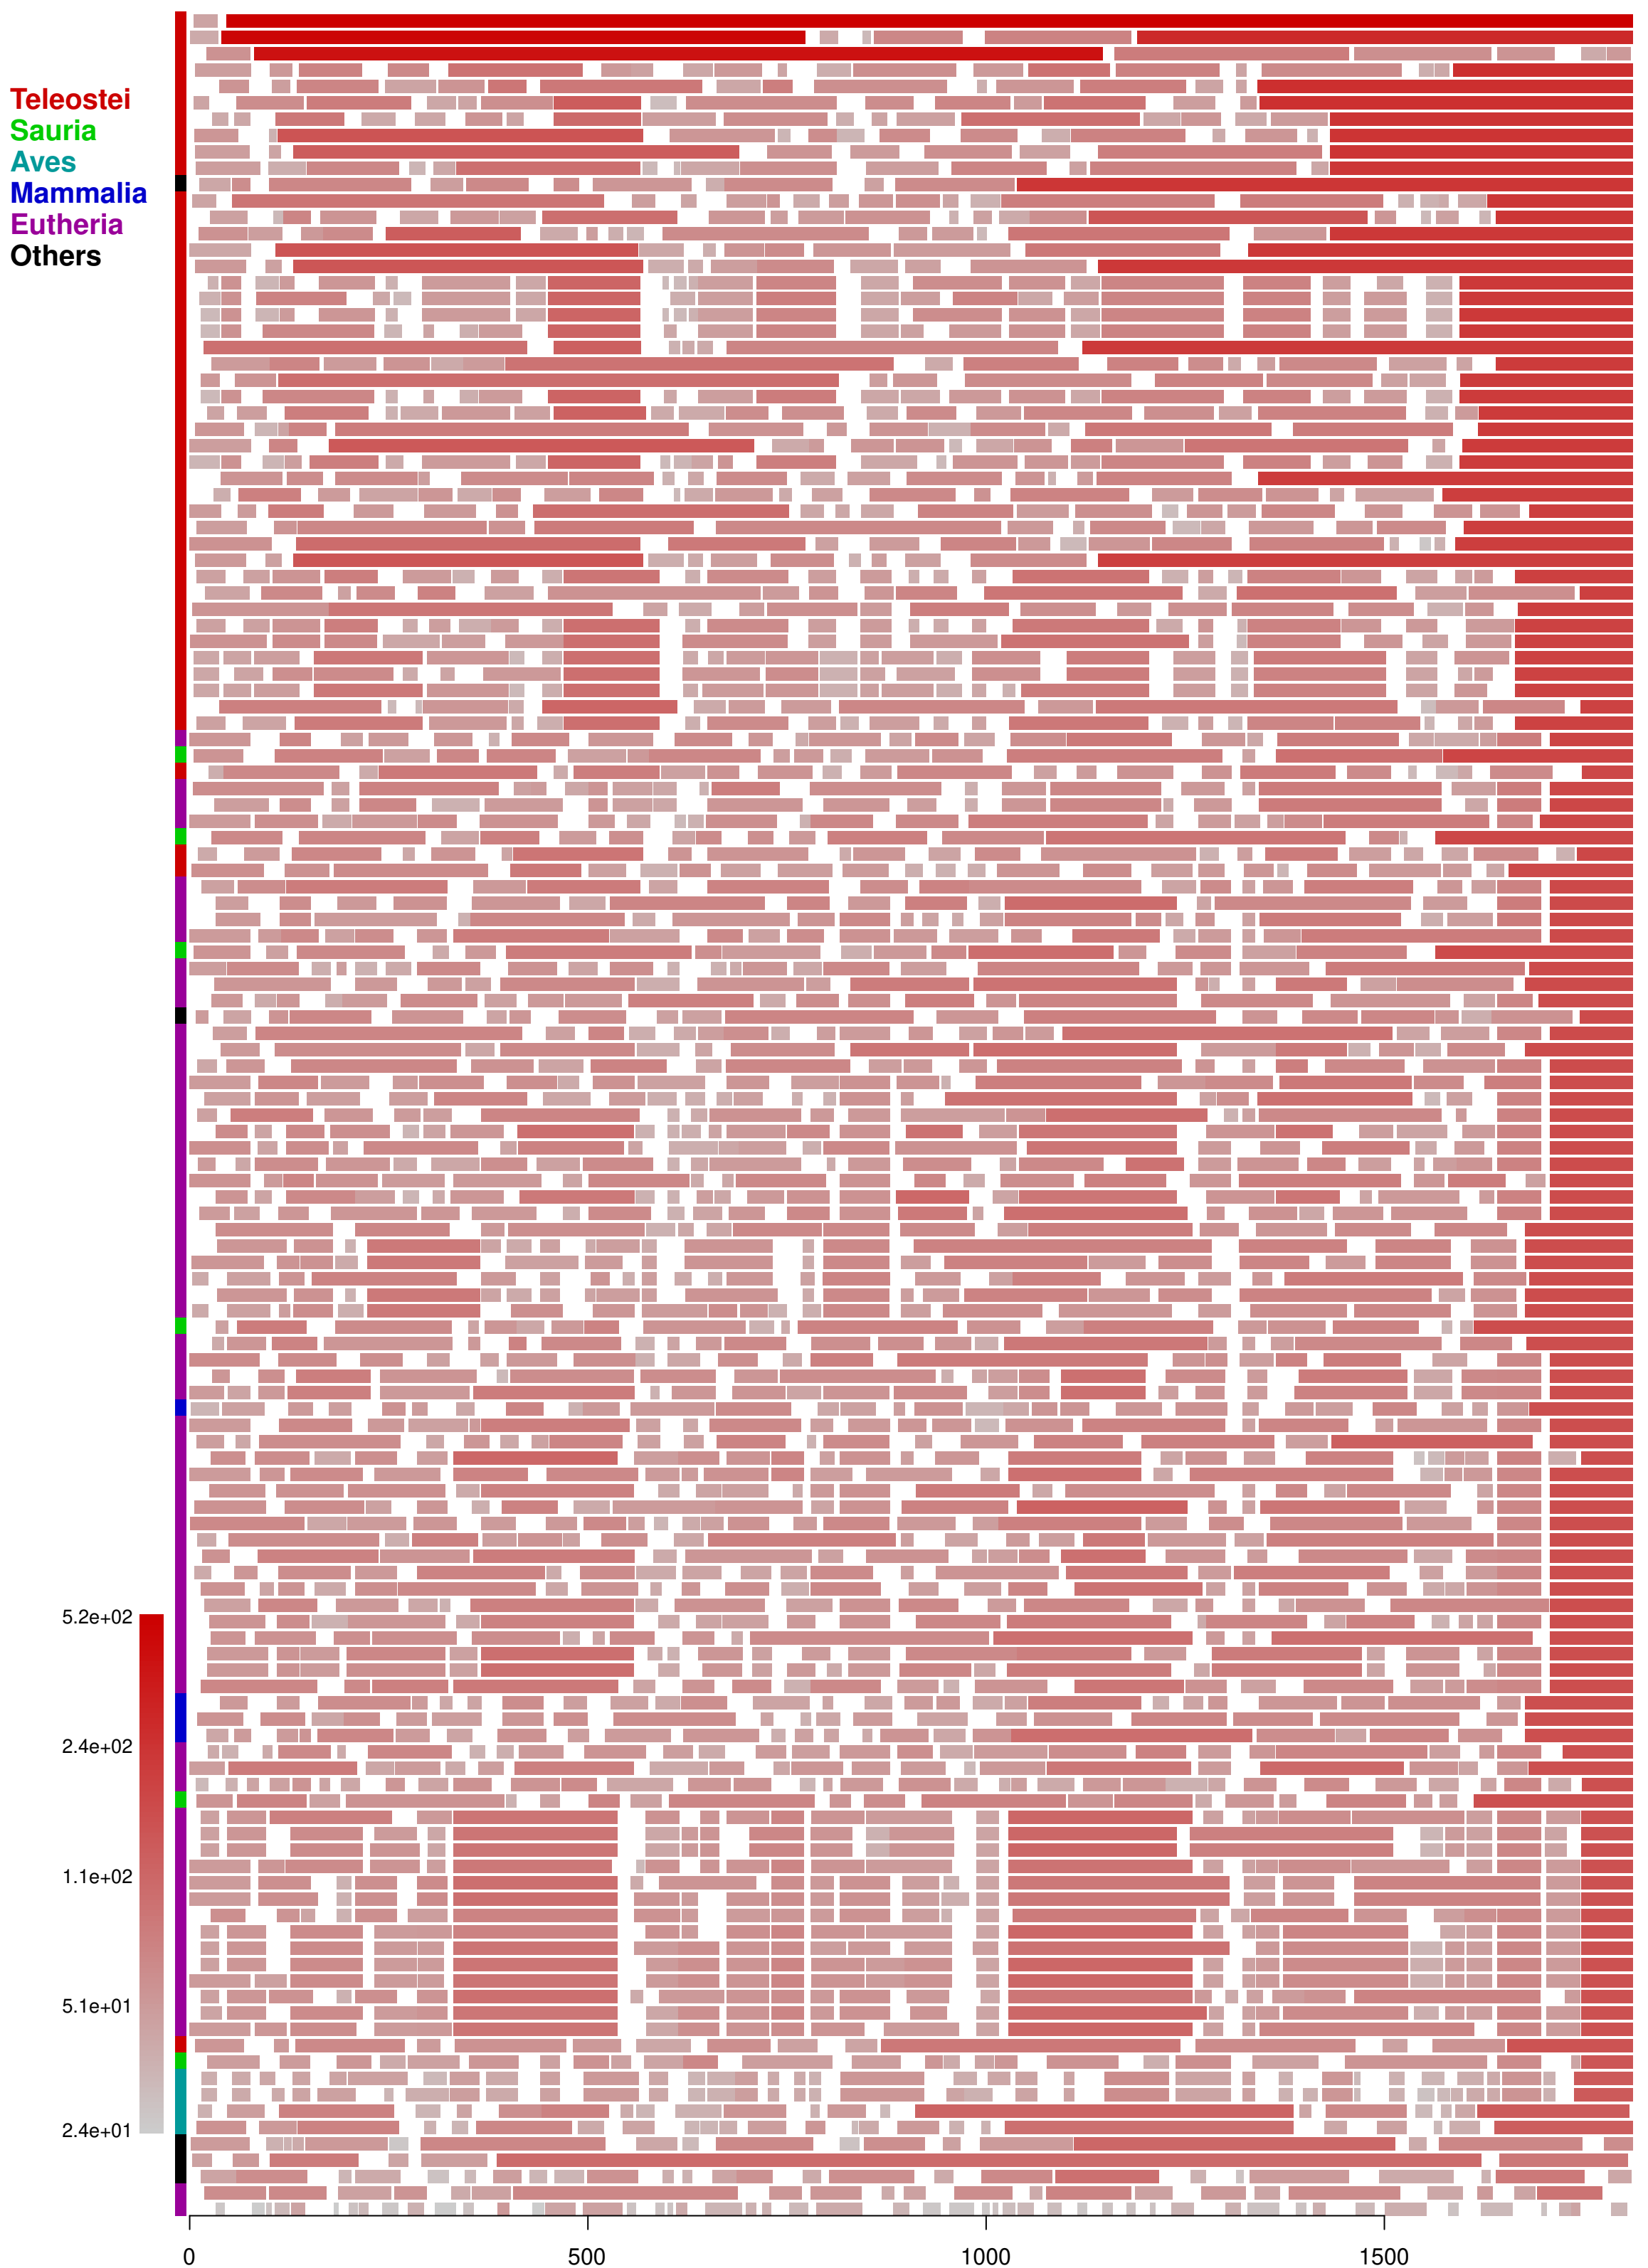

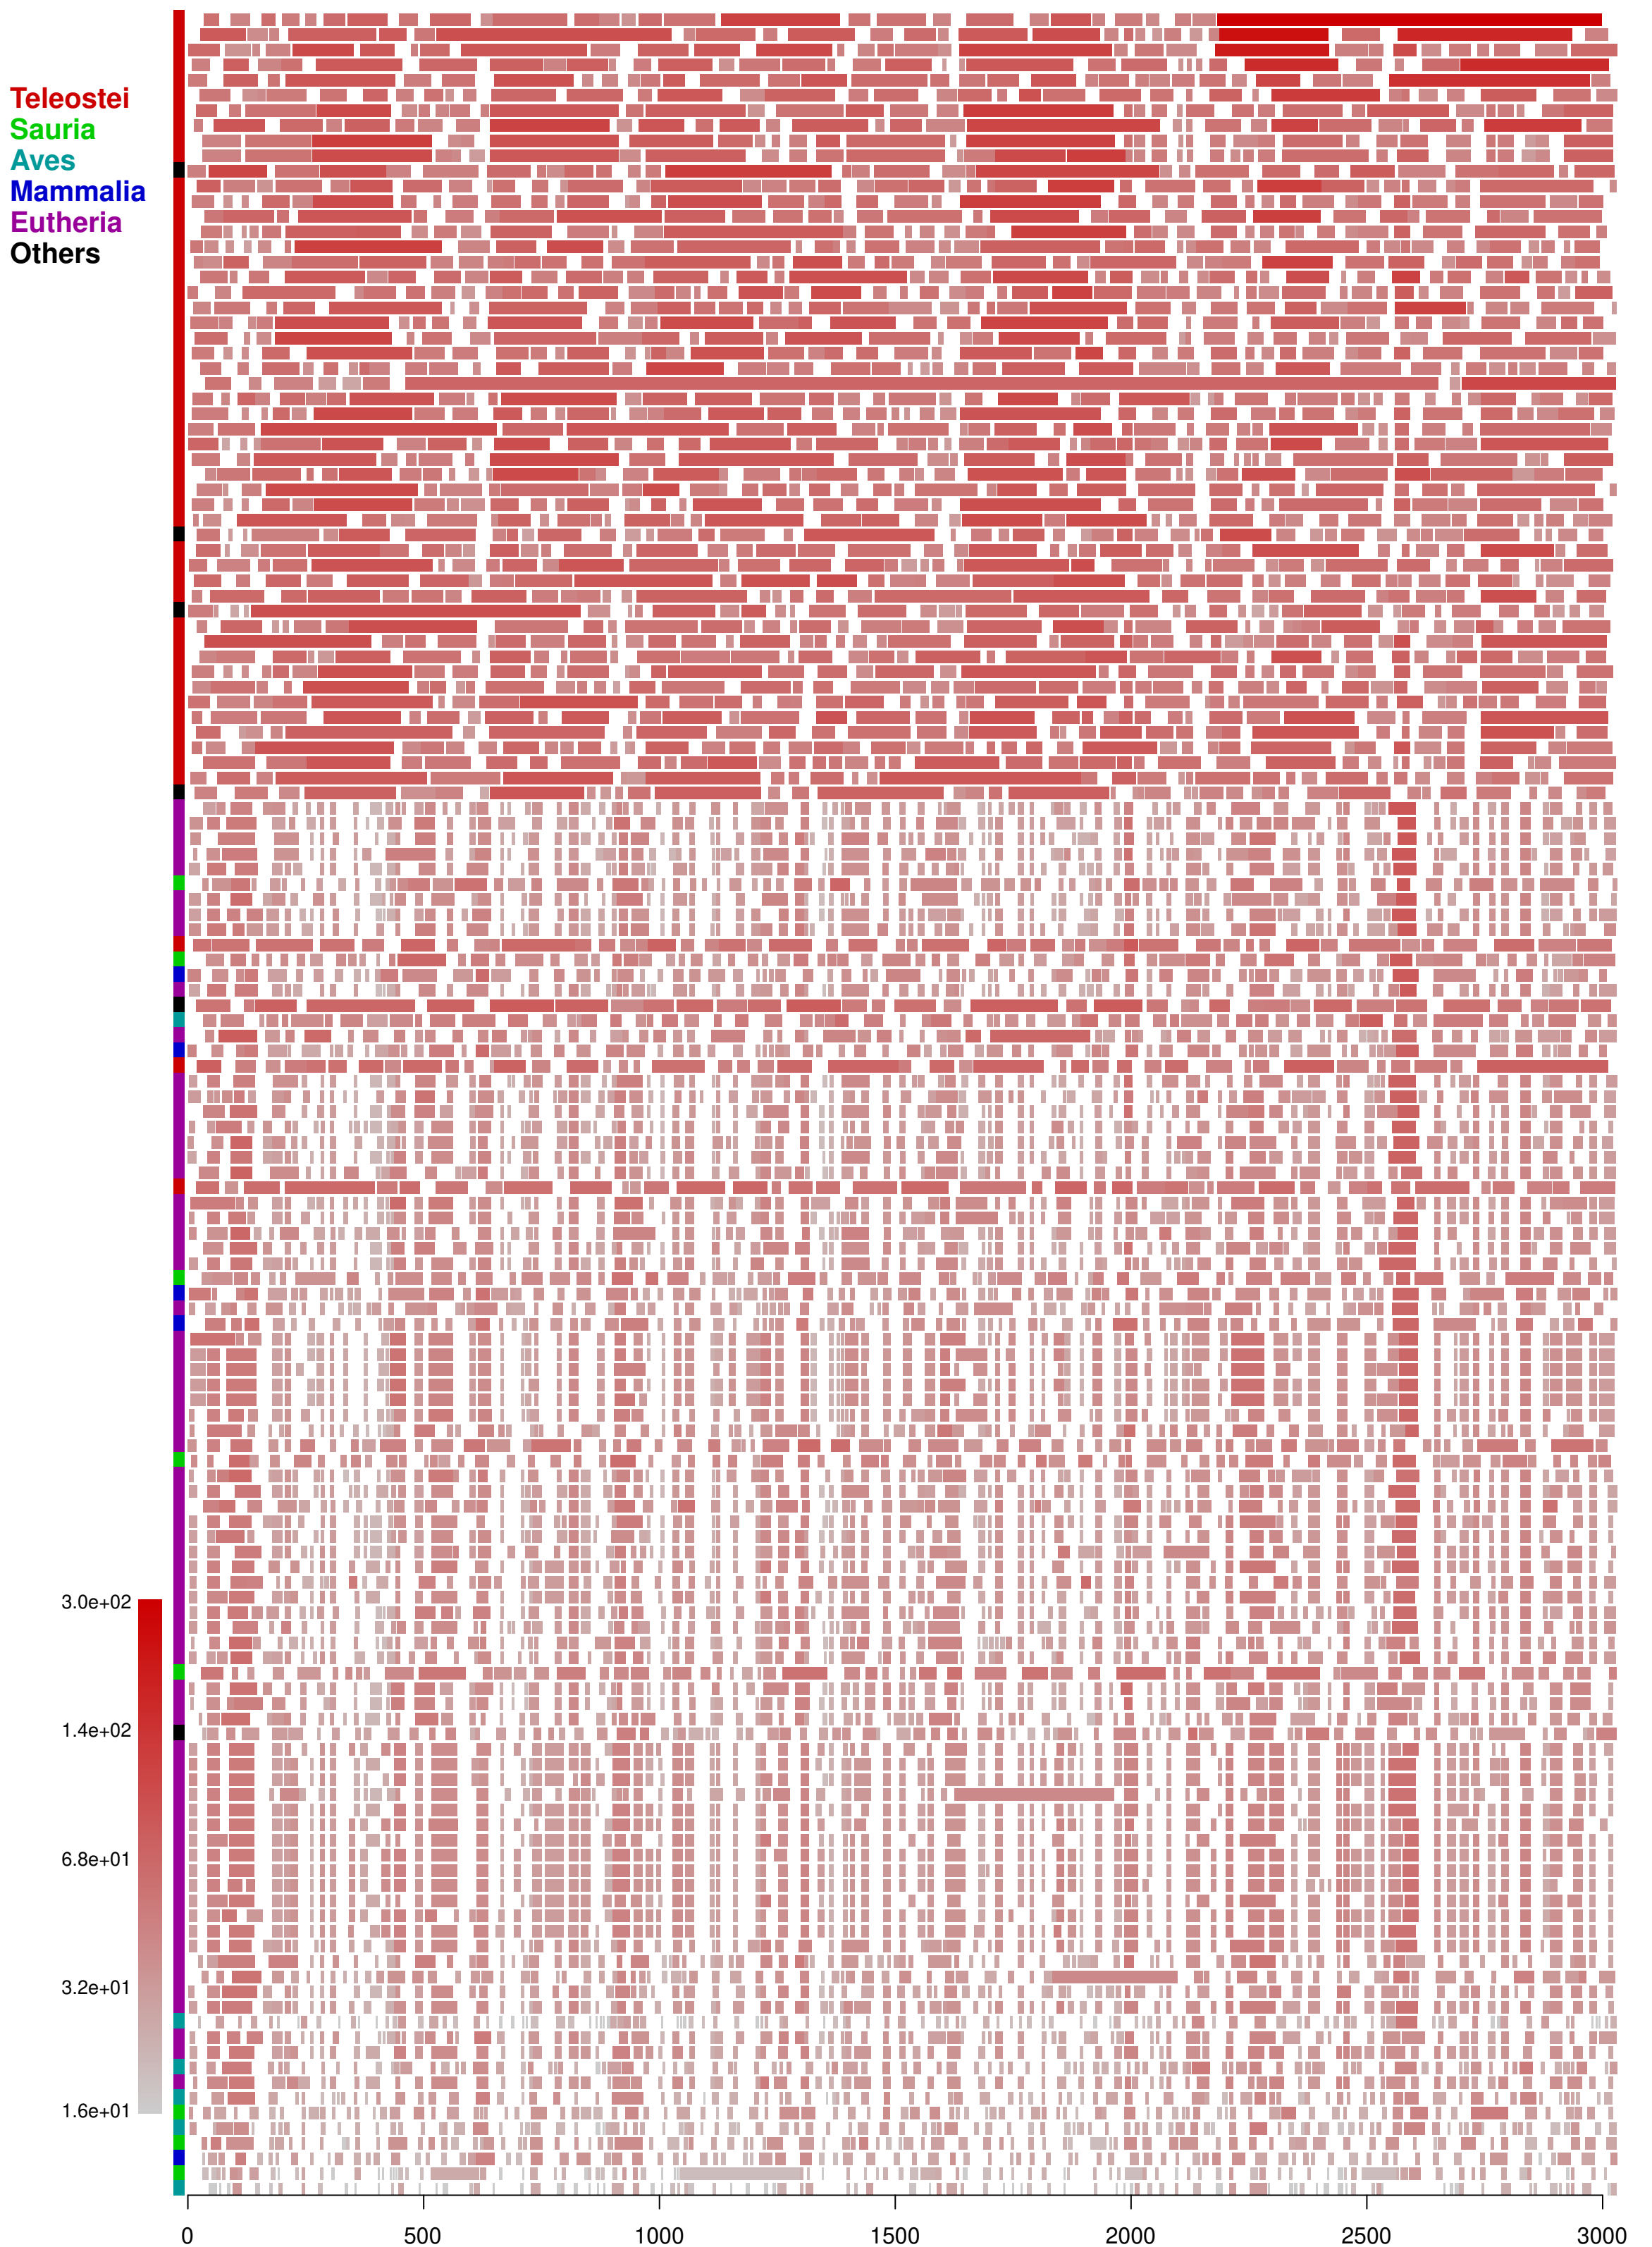

0 alignments above max size (1.0e+08)

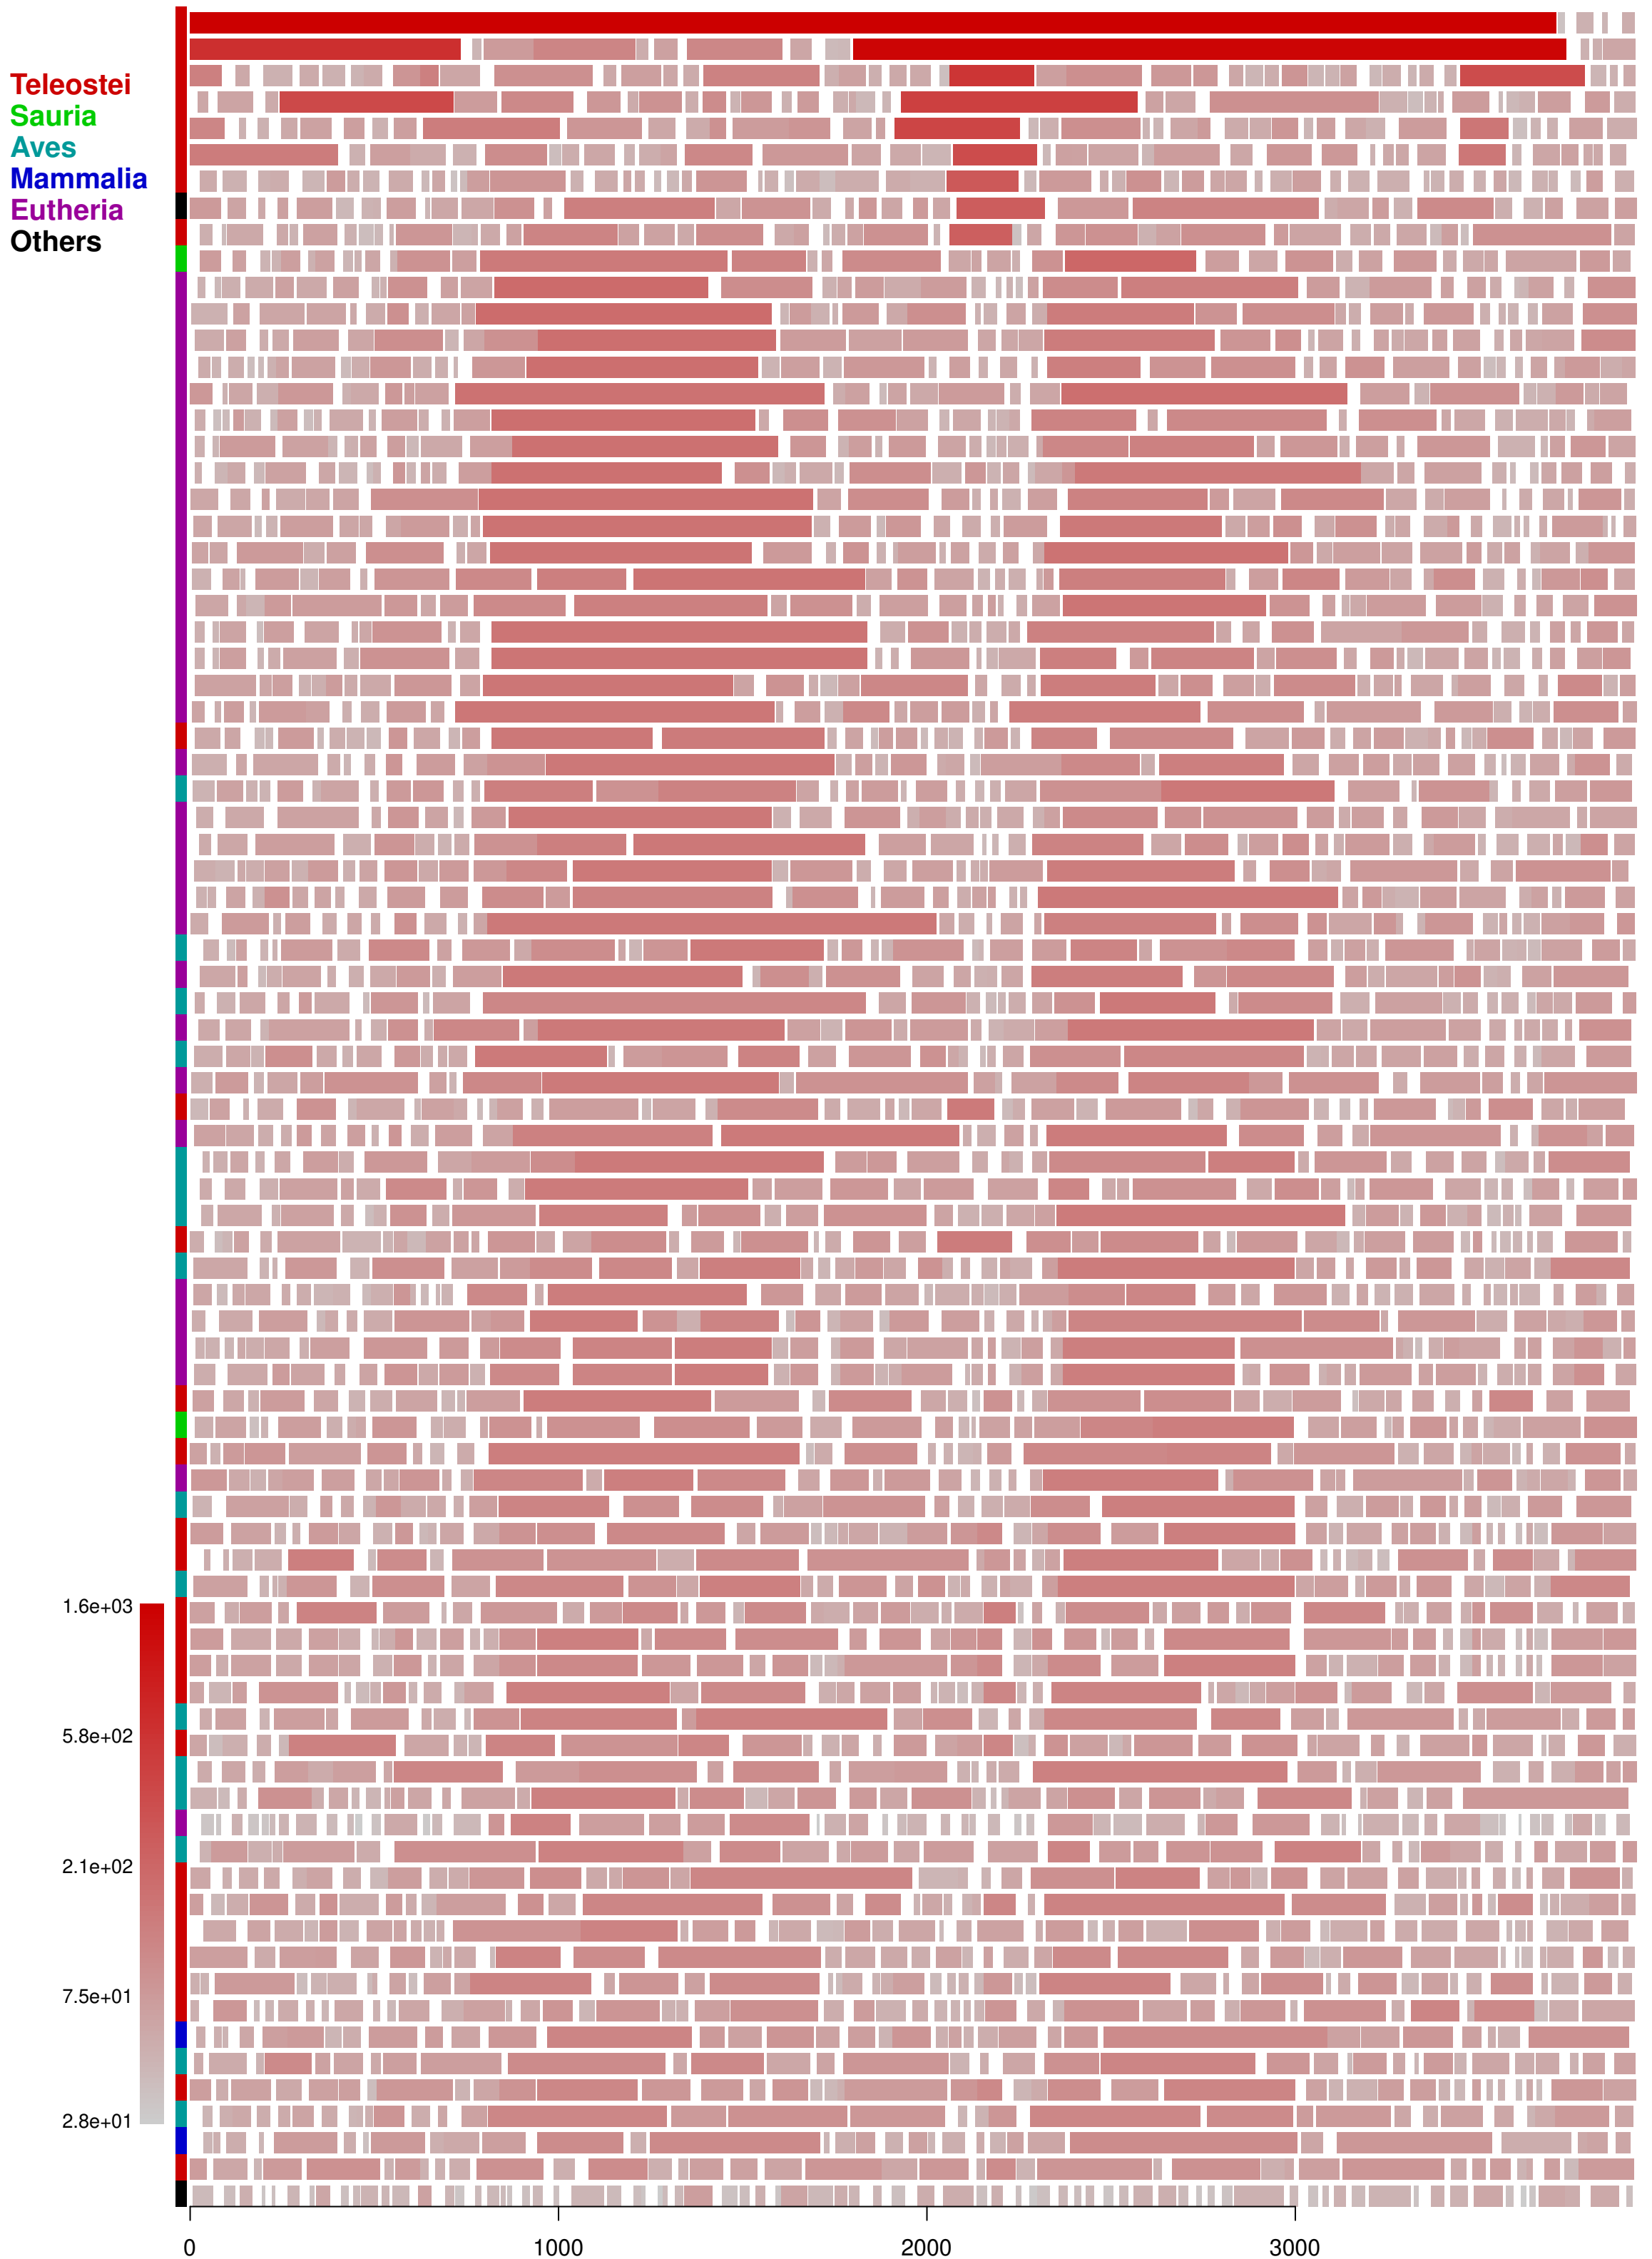

Teleostei  
Sauria  
Aves  
Mammalia  
Eutheria  
Others

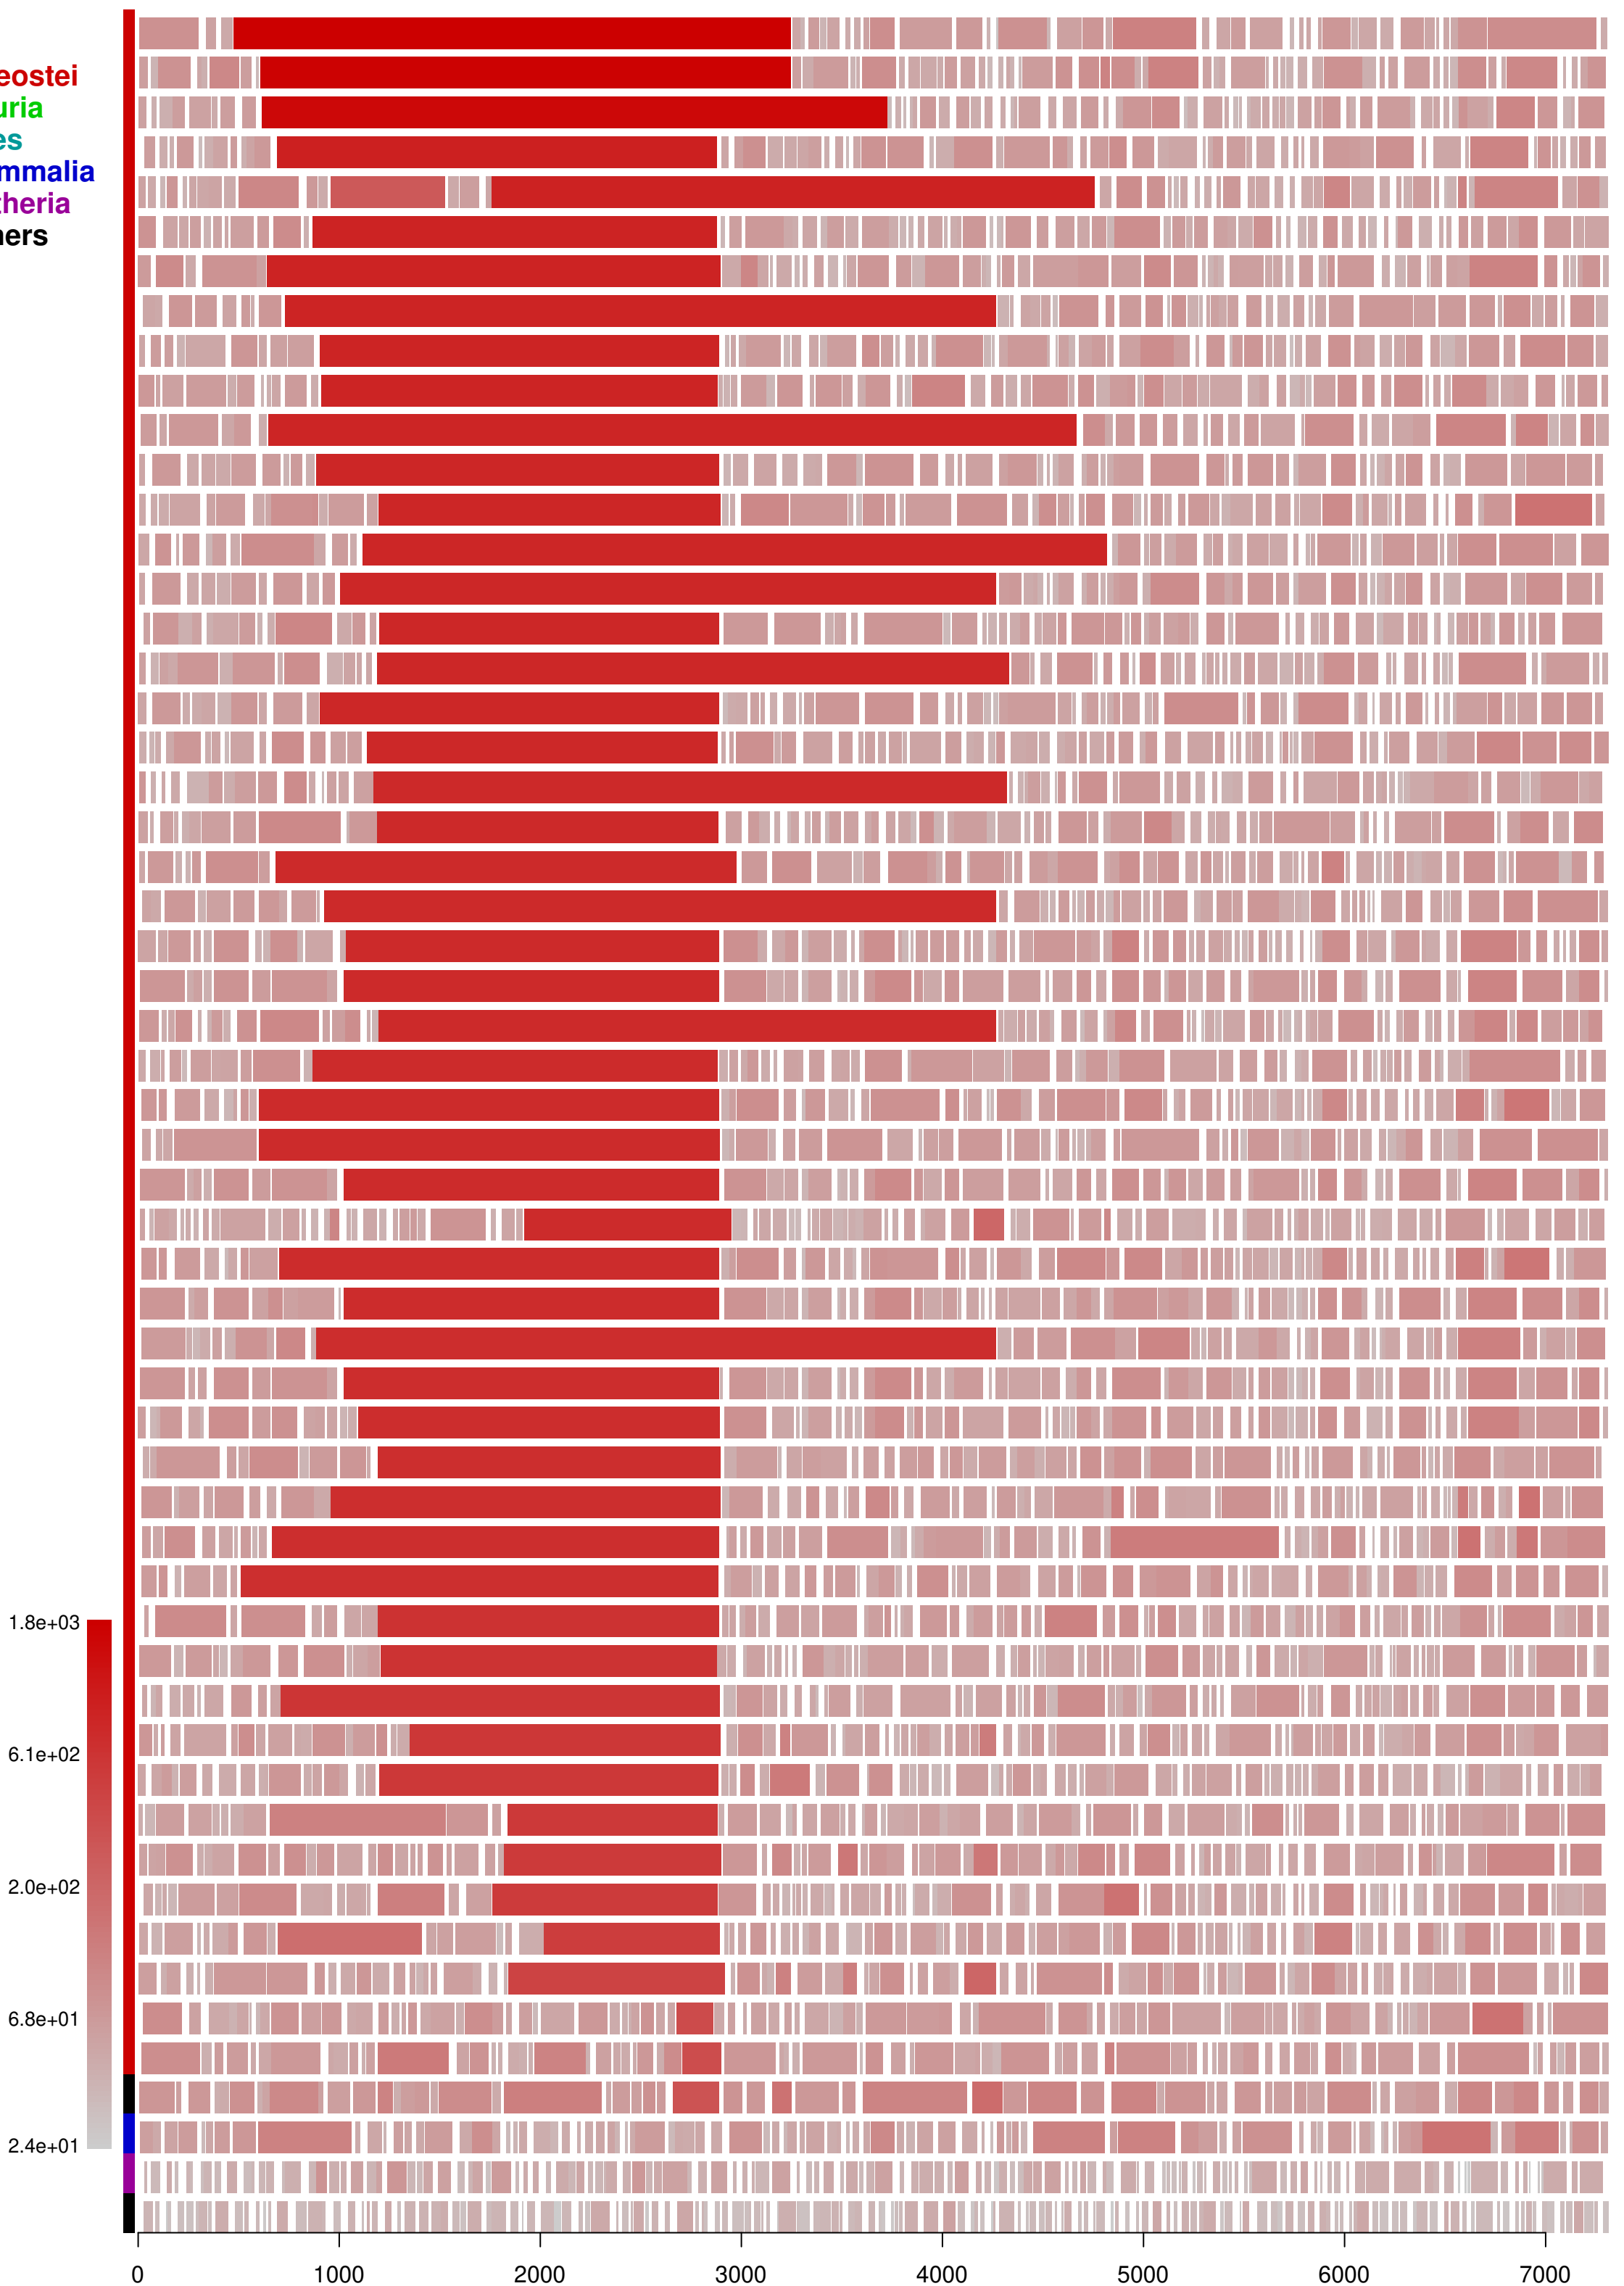



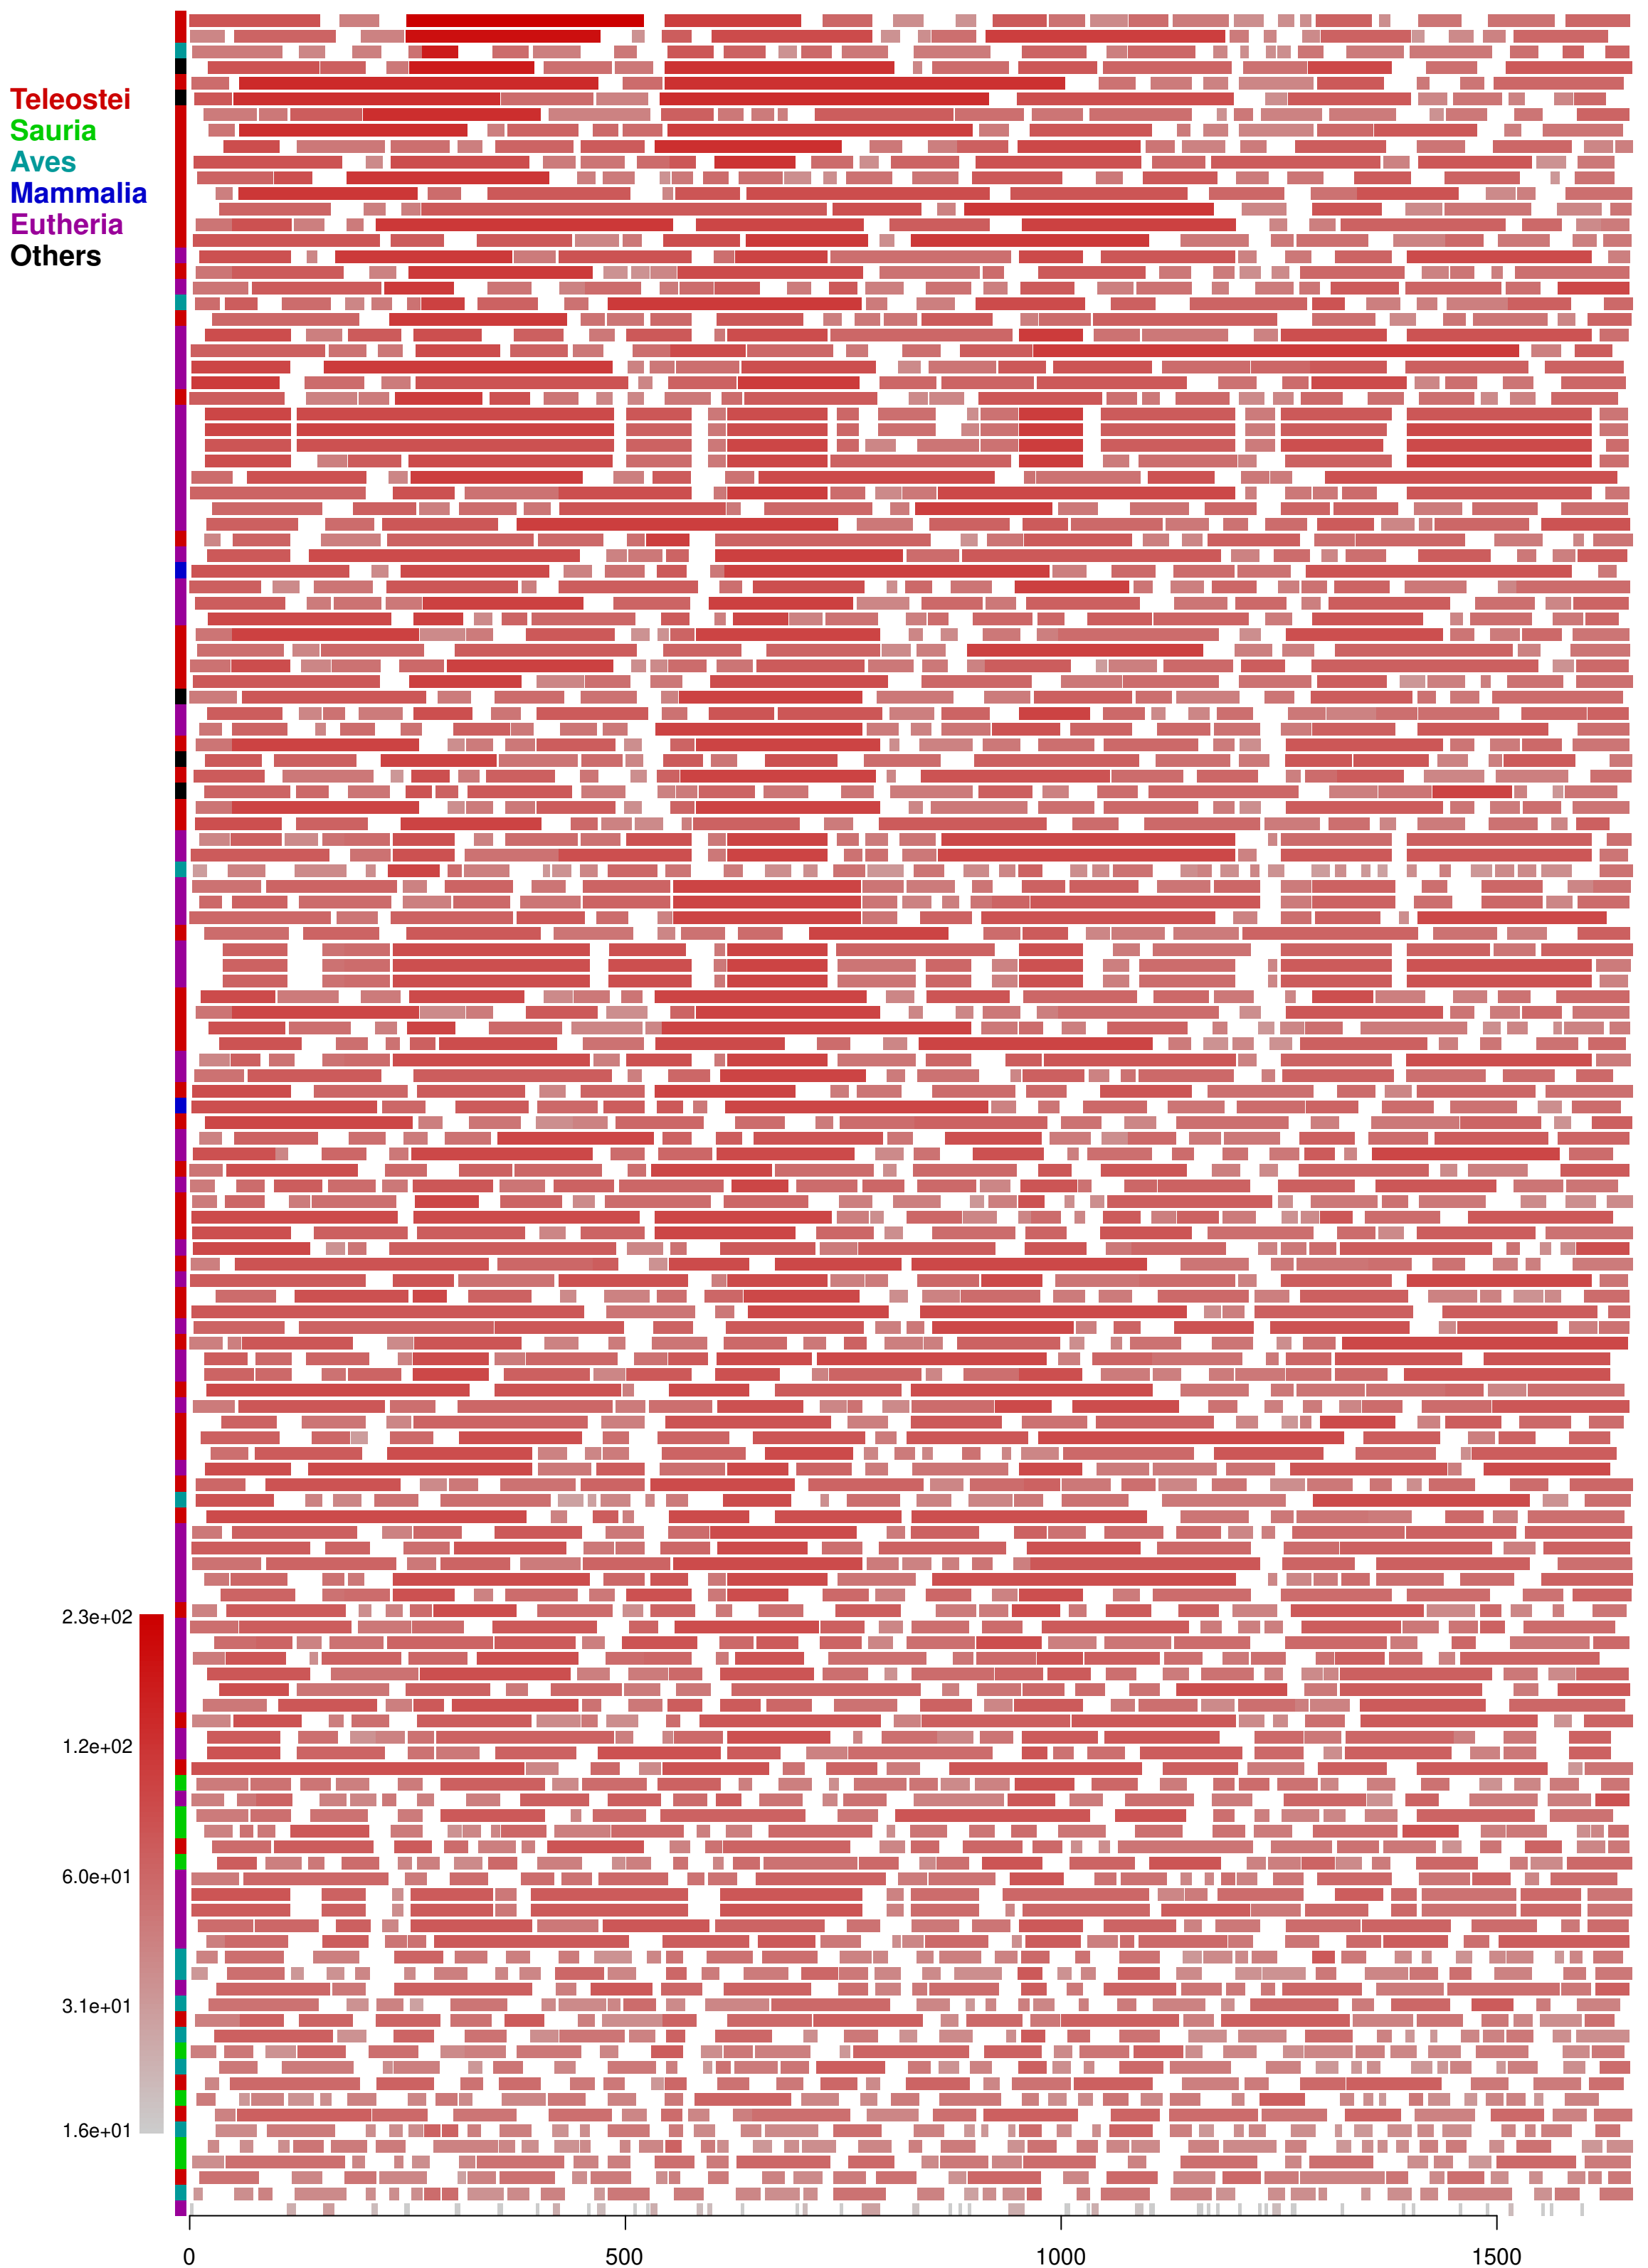

0 alignments above max size (1.0e+08)

Teleostei  
Sauria  
Aves  
Mammalia  
Eutheria  
Others

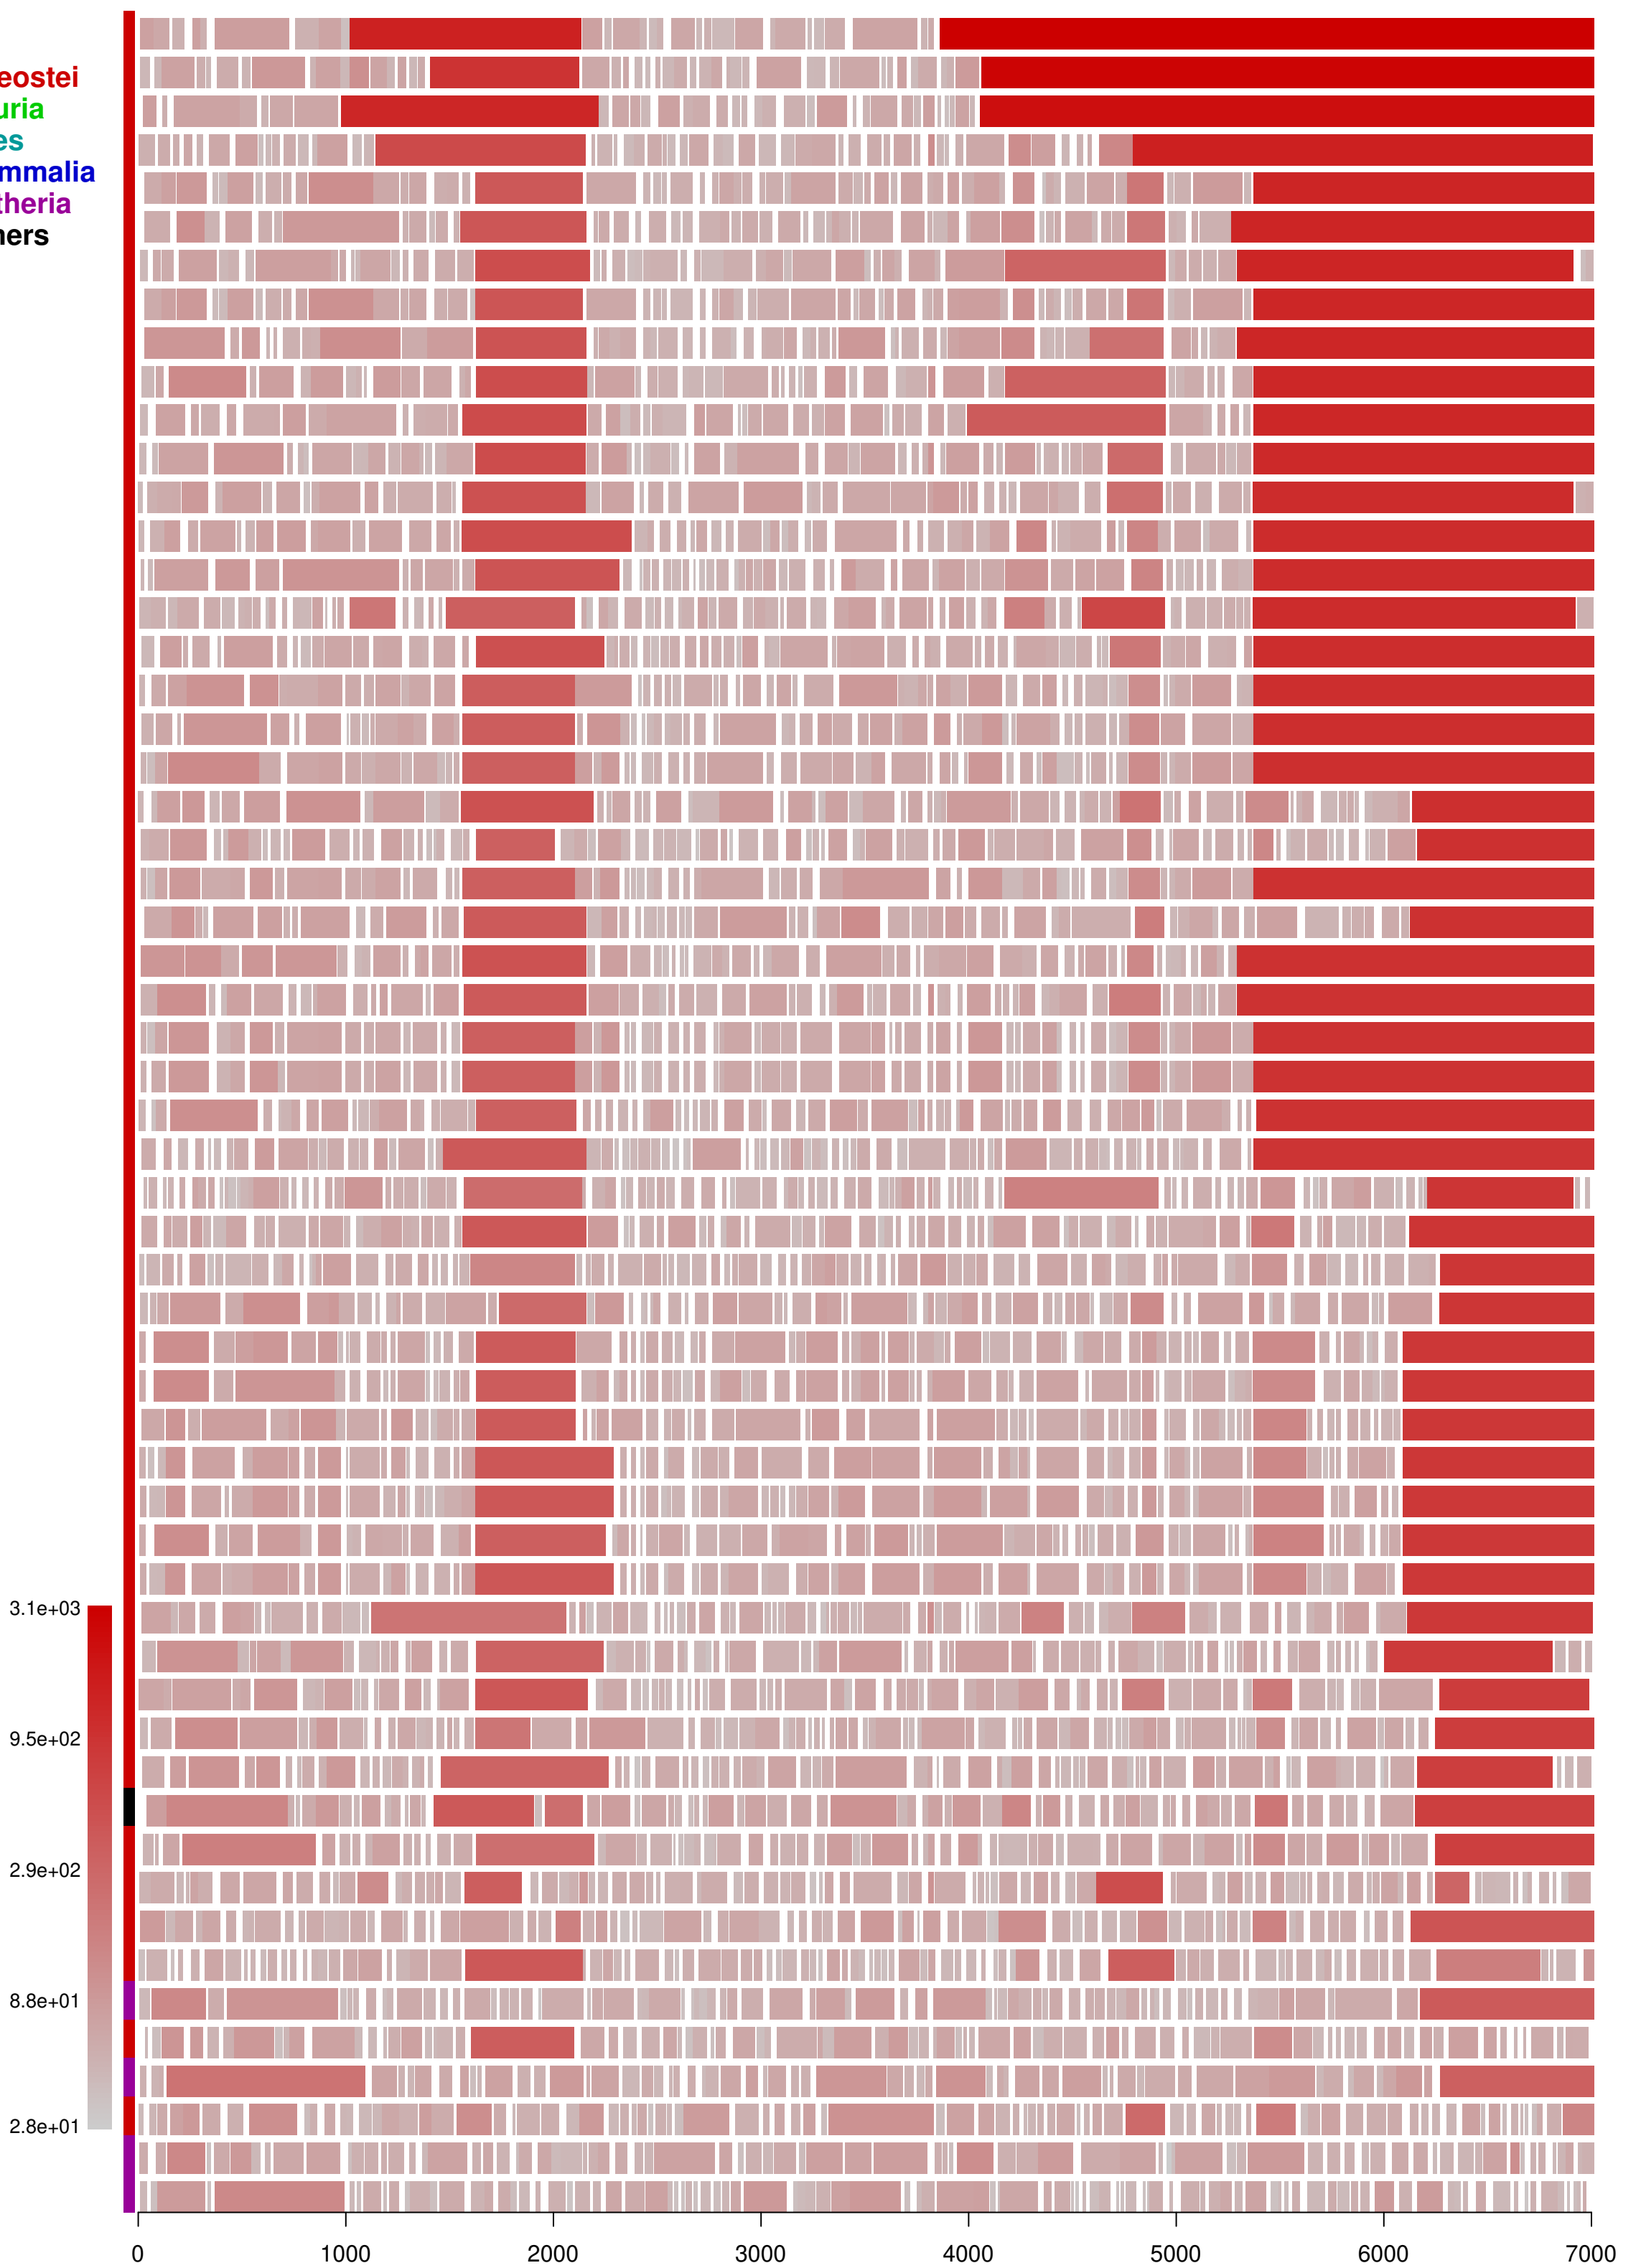

3.1e+03

9.5e+02

2.9e+02

8.8e+01

2.8e+01

0 1000 2000 3000 4000 5000 6000 7000

Teleostei  
Sauria  
Aves  
Mammalia  
Eutheria  
Others

2.1e+03  
6.8e+02  
2.2e+02  
7.1e+01  
2.4e+01

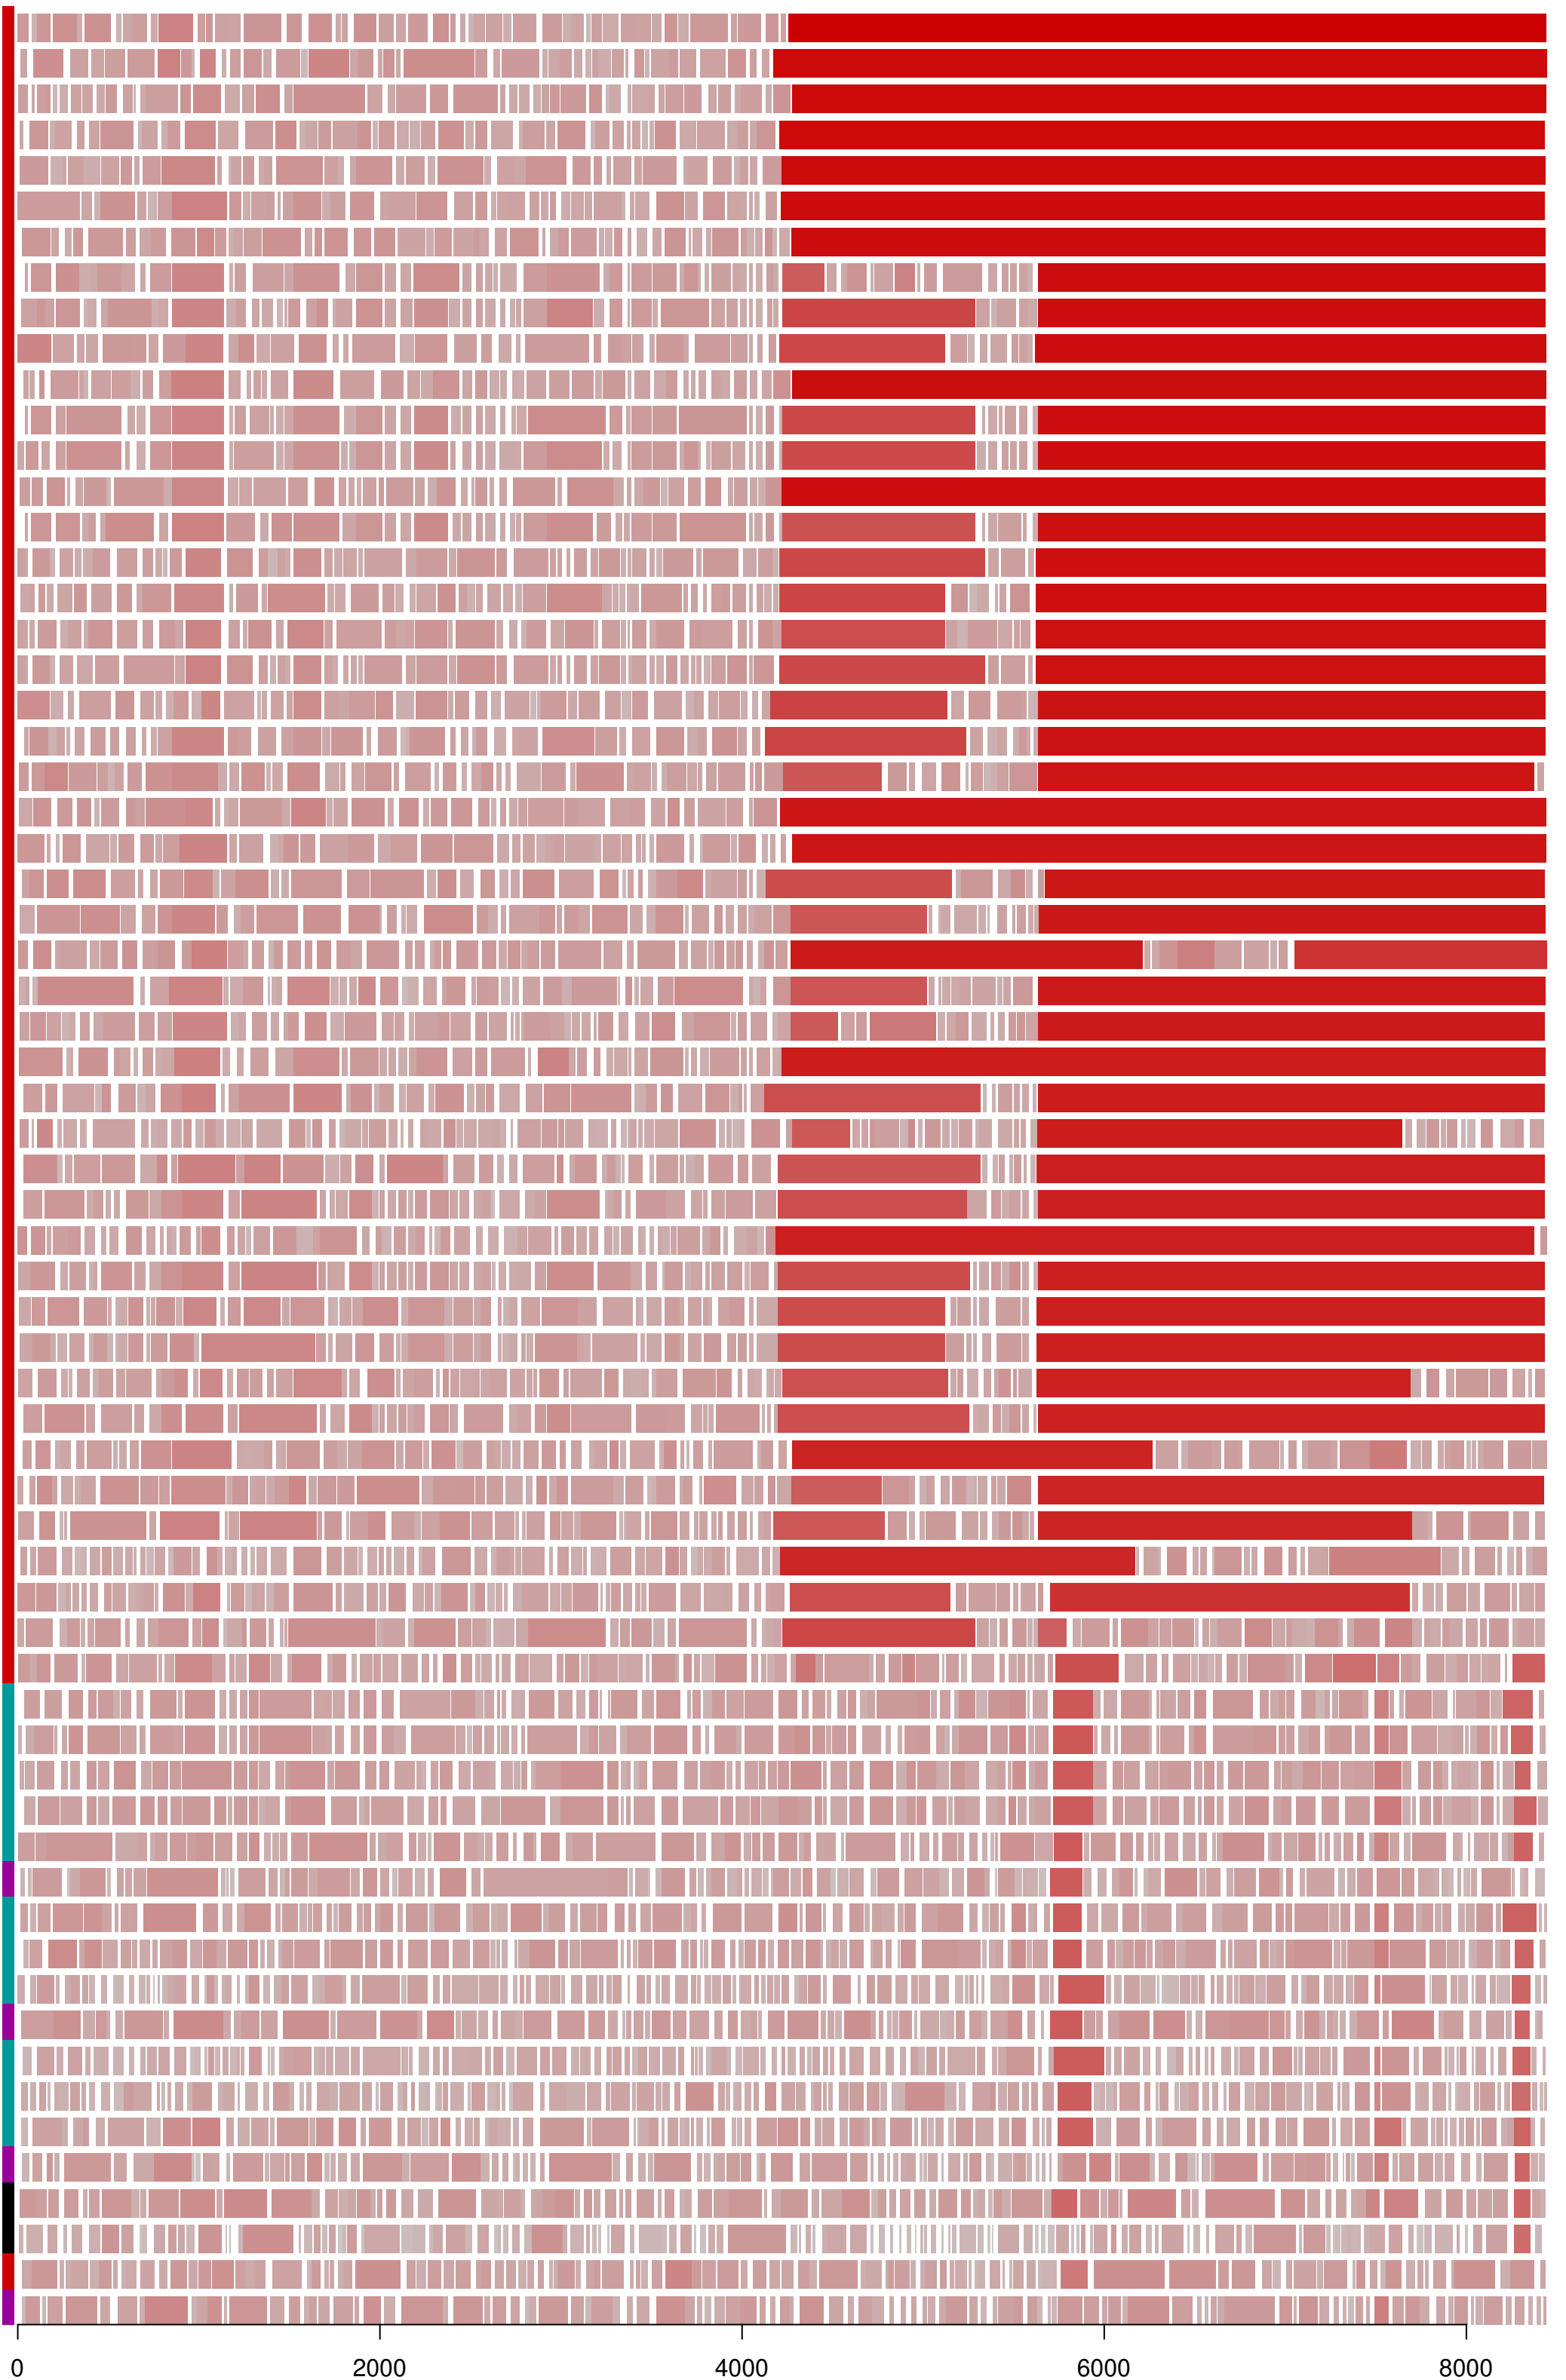

Teleostei  
Sauria  
Aves  
Mammalia  
Eutheria  
Others

1.4e+03  
5.3e+02  
2.1e+02  
8.0e+01  
3.2e+01

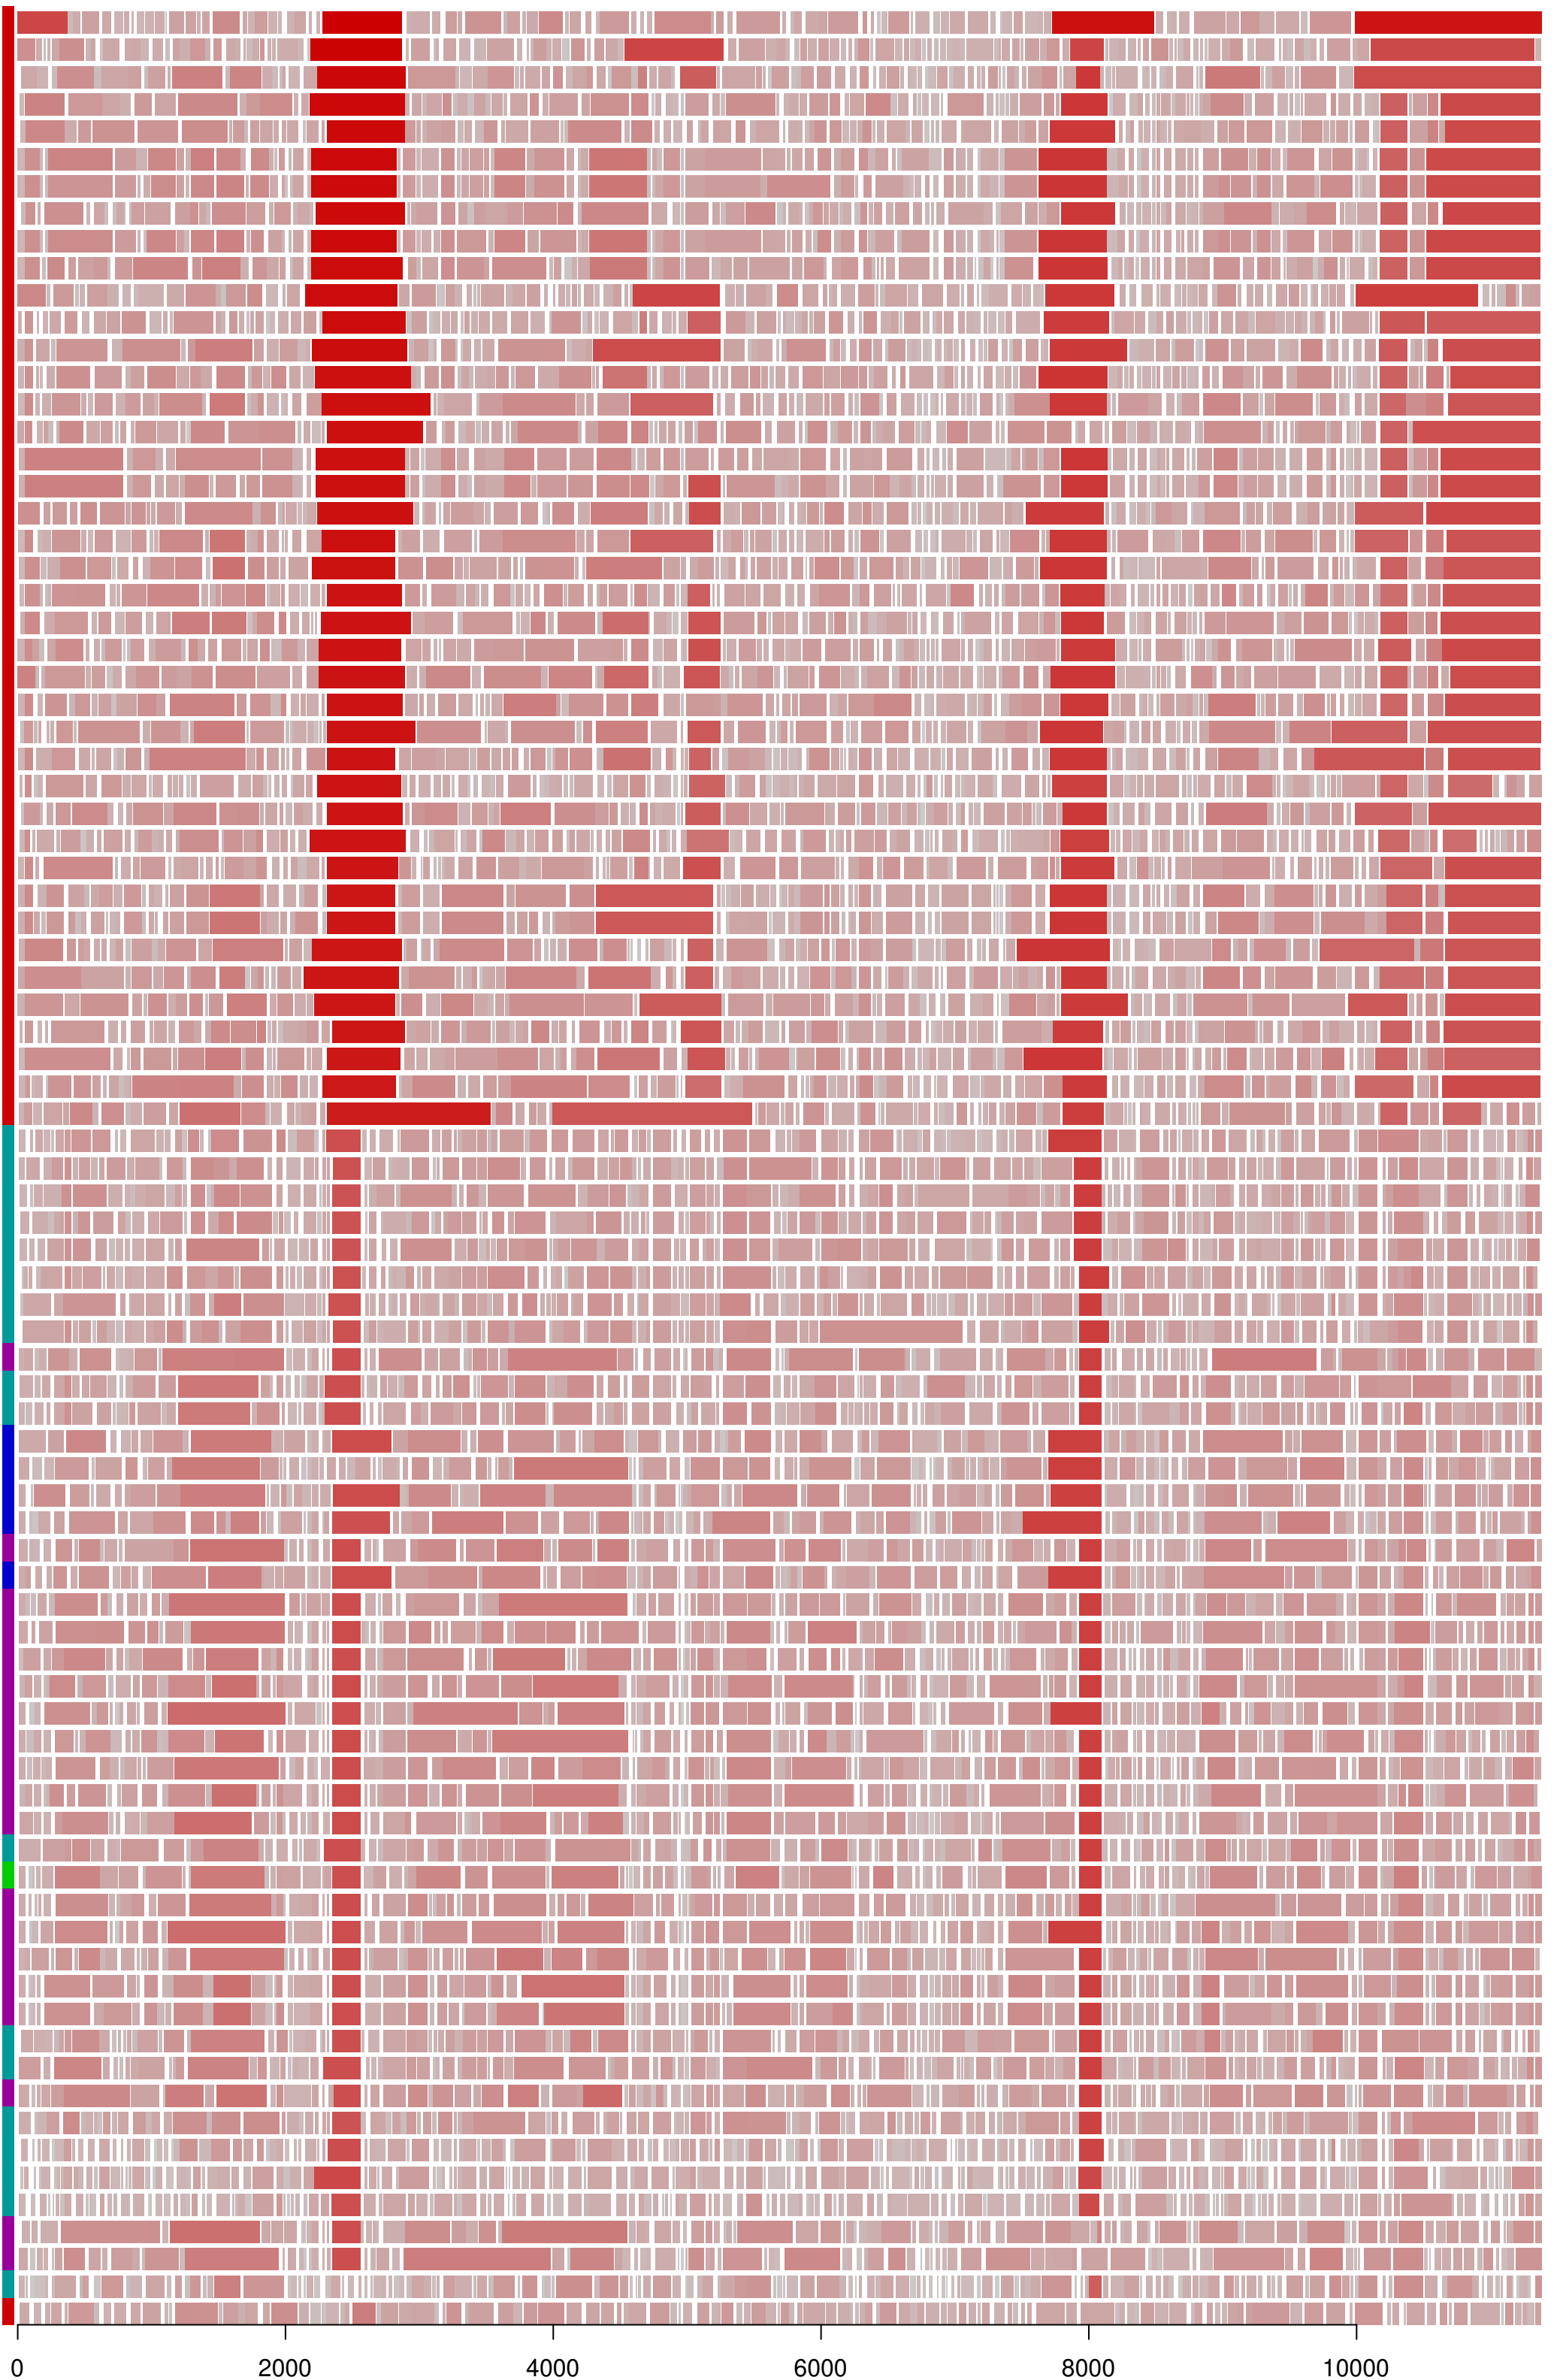

Teleostei  
Sauria  
Aves  
Mammalia  
Eutheria  
Others

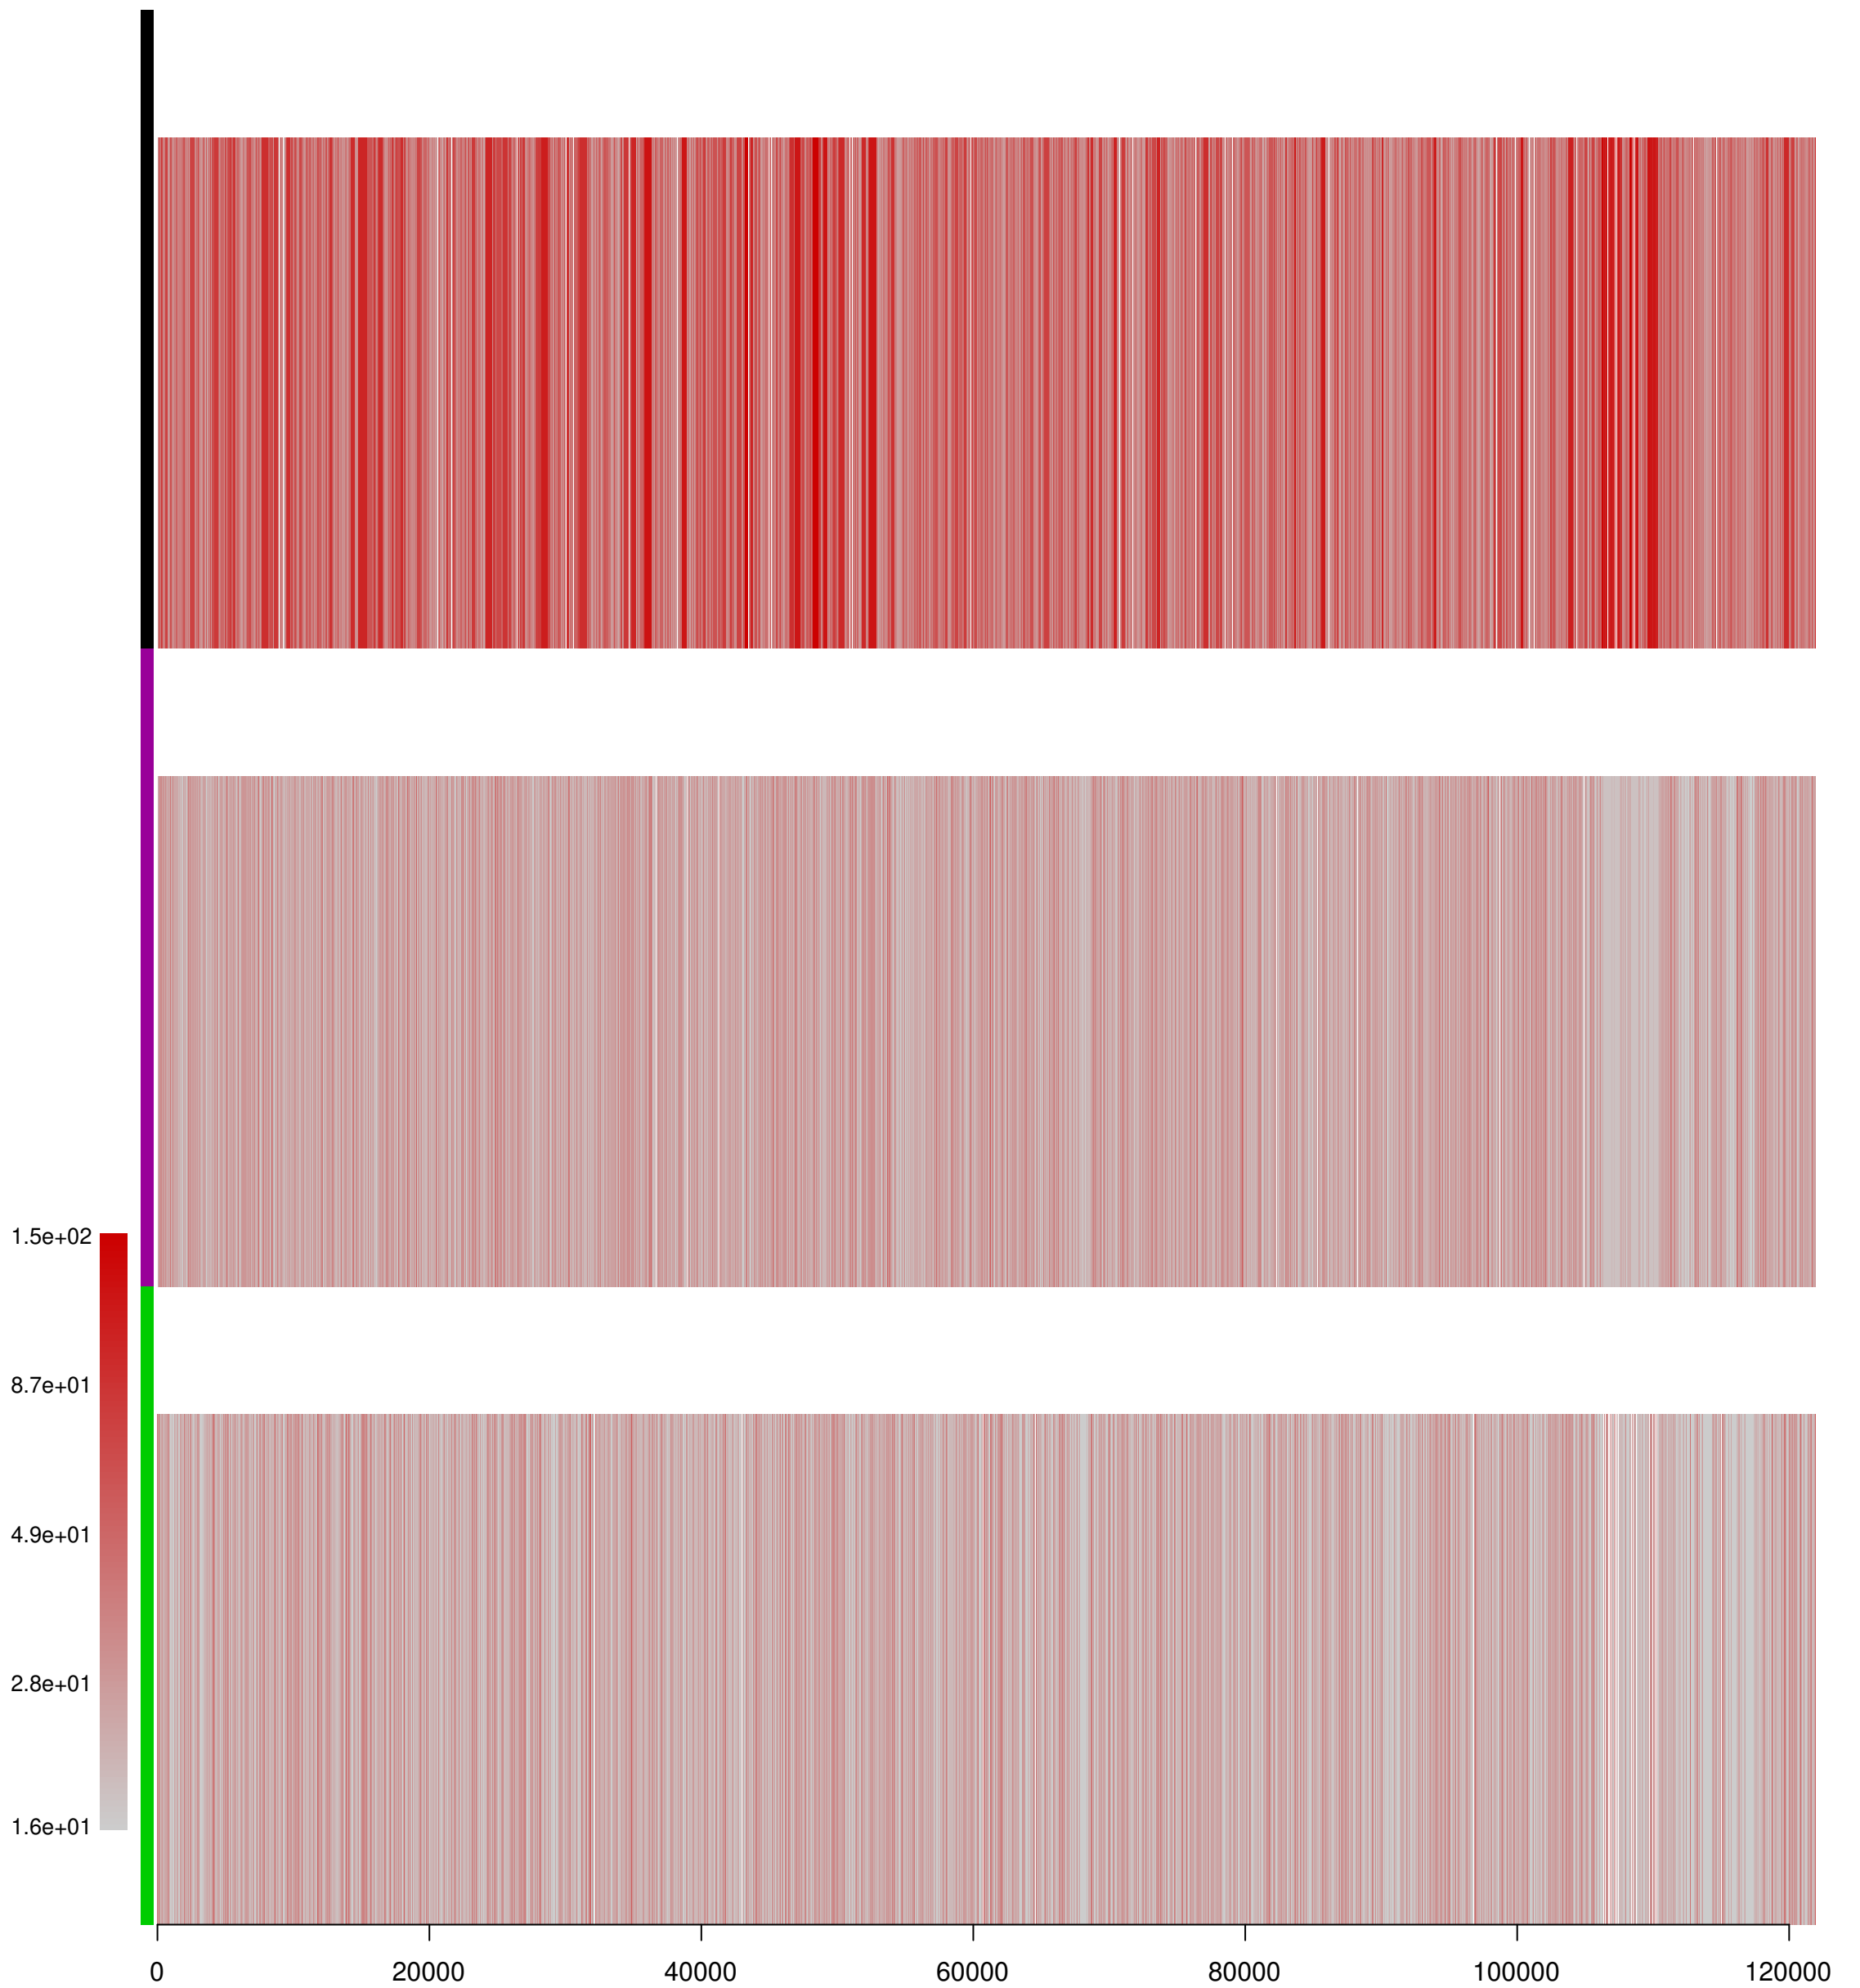

115 alignments above max size (1.0e+08)

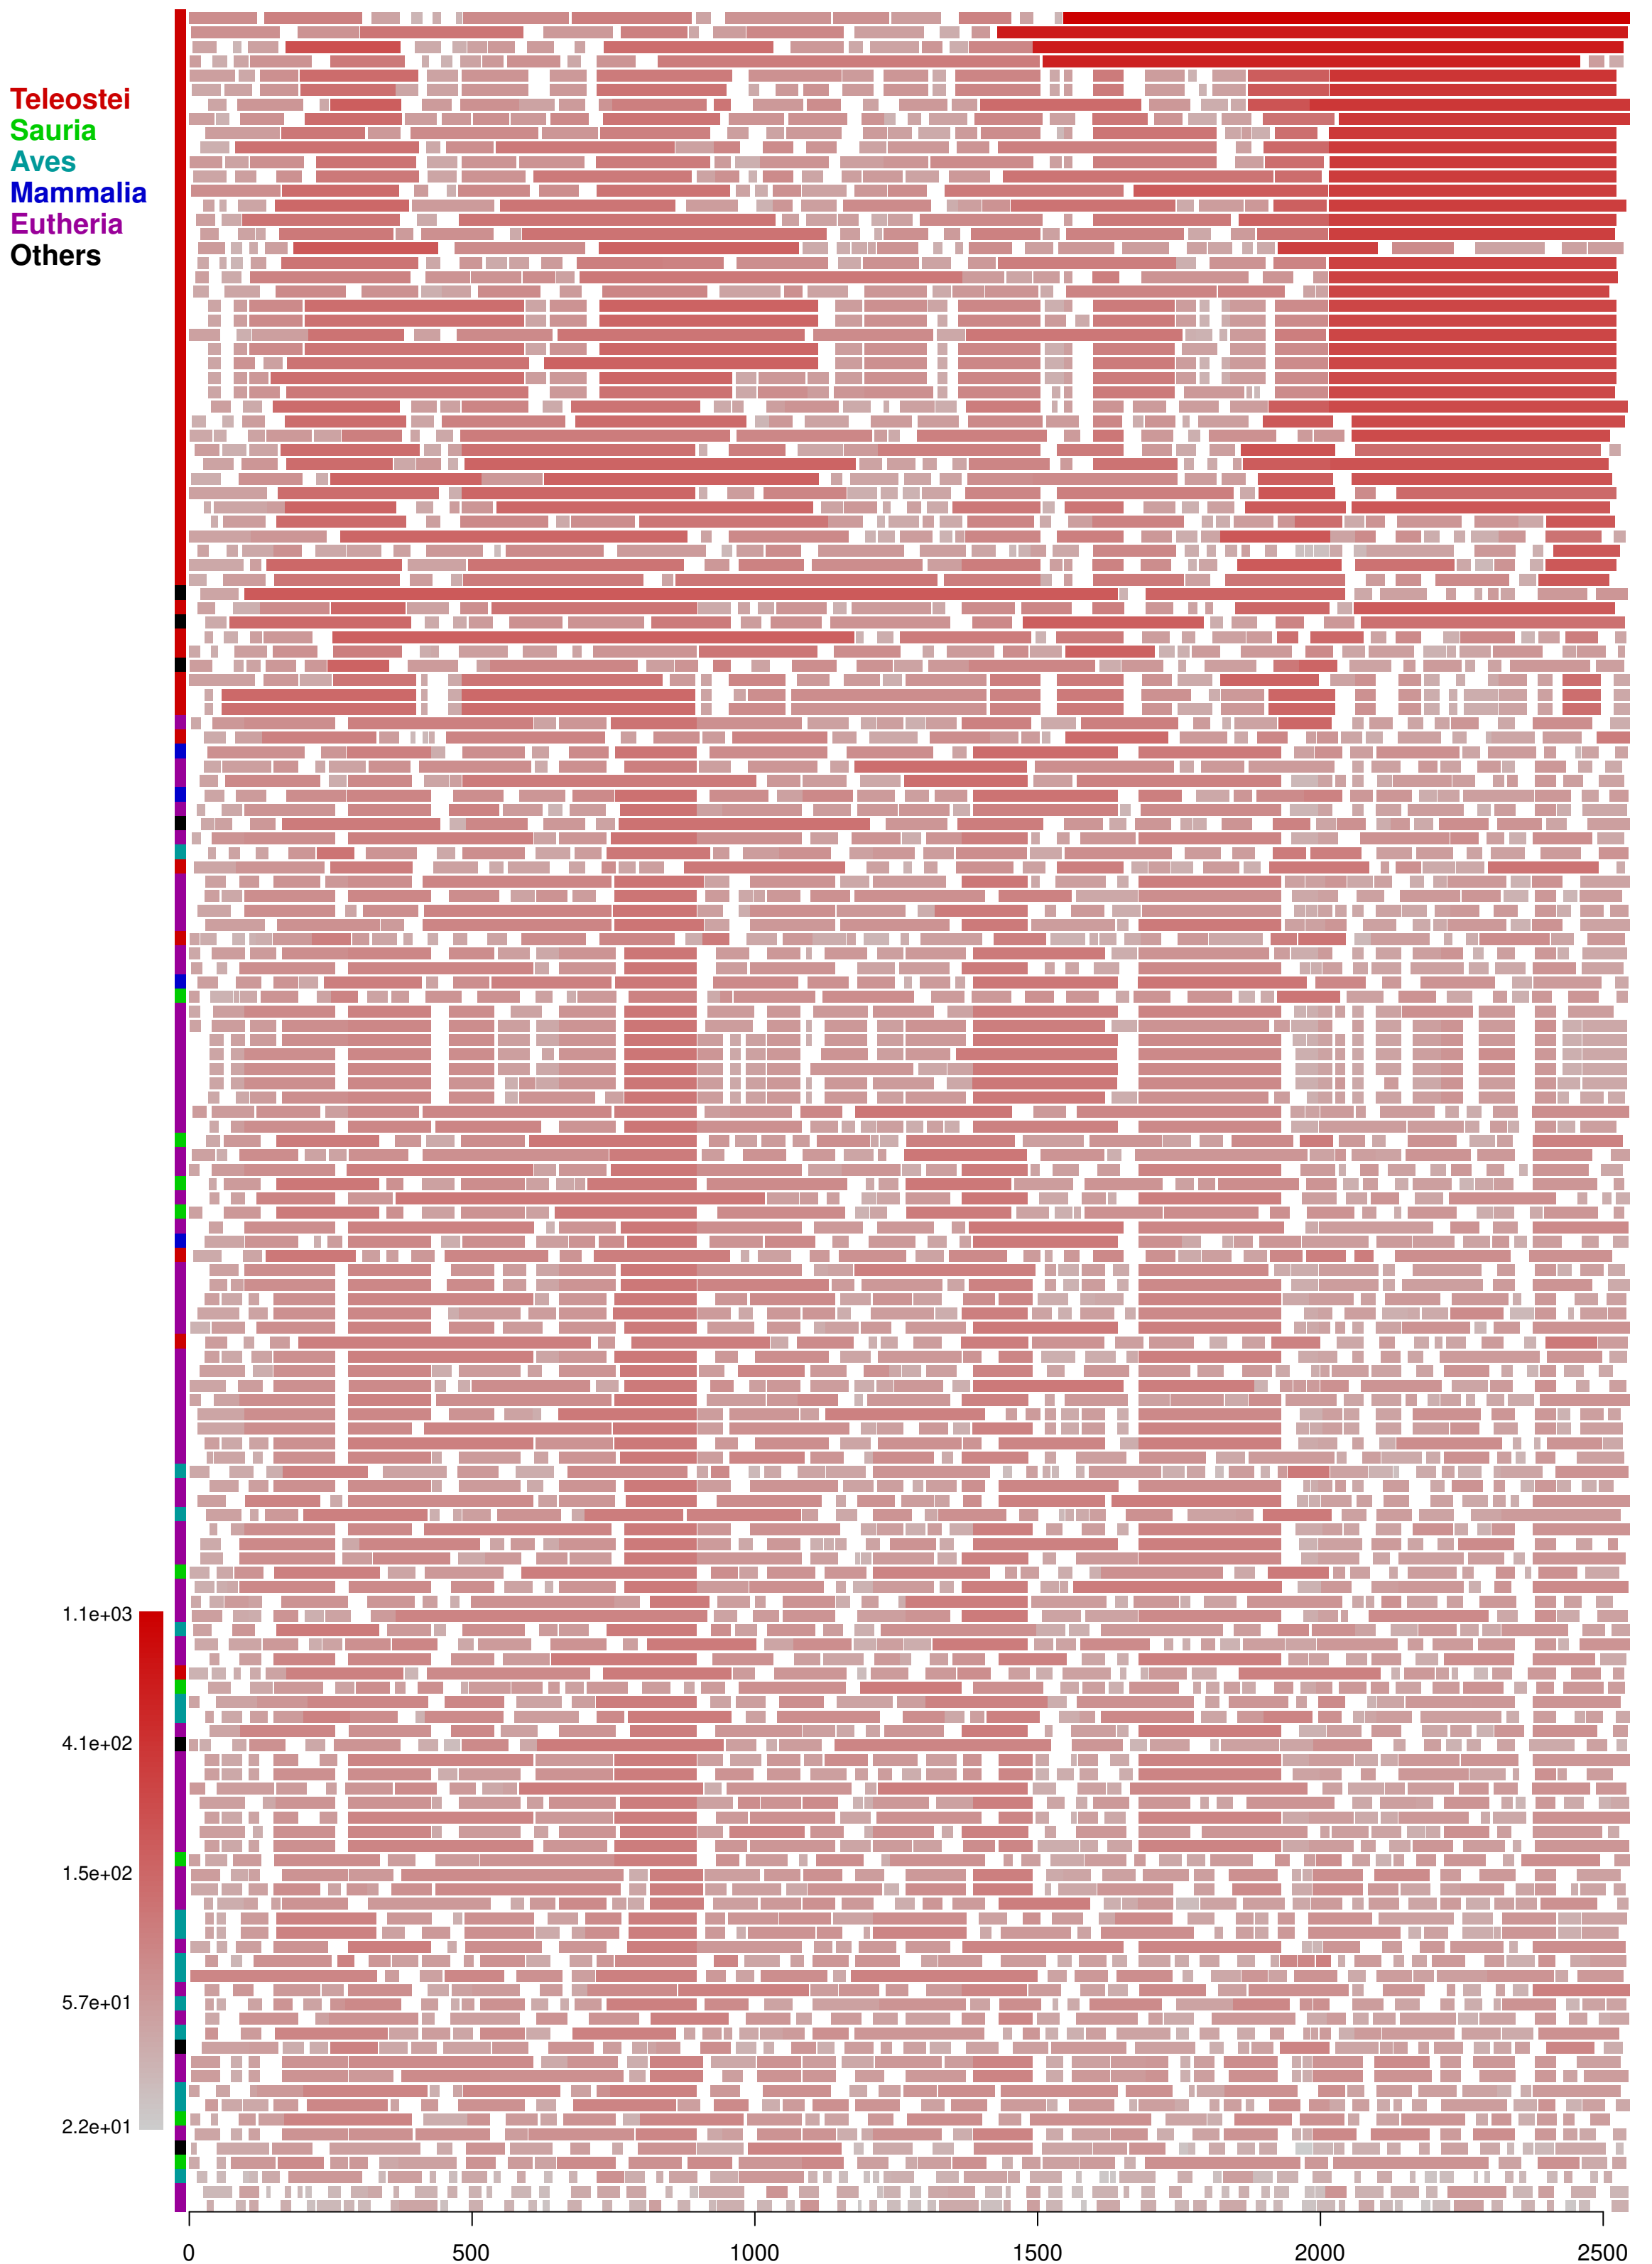

0 alignments above max size (1.0e+08)

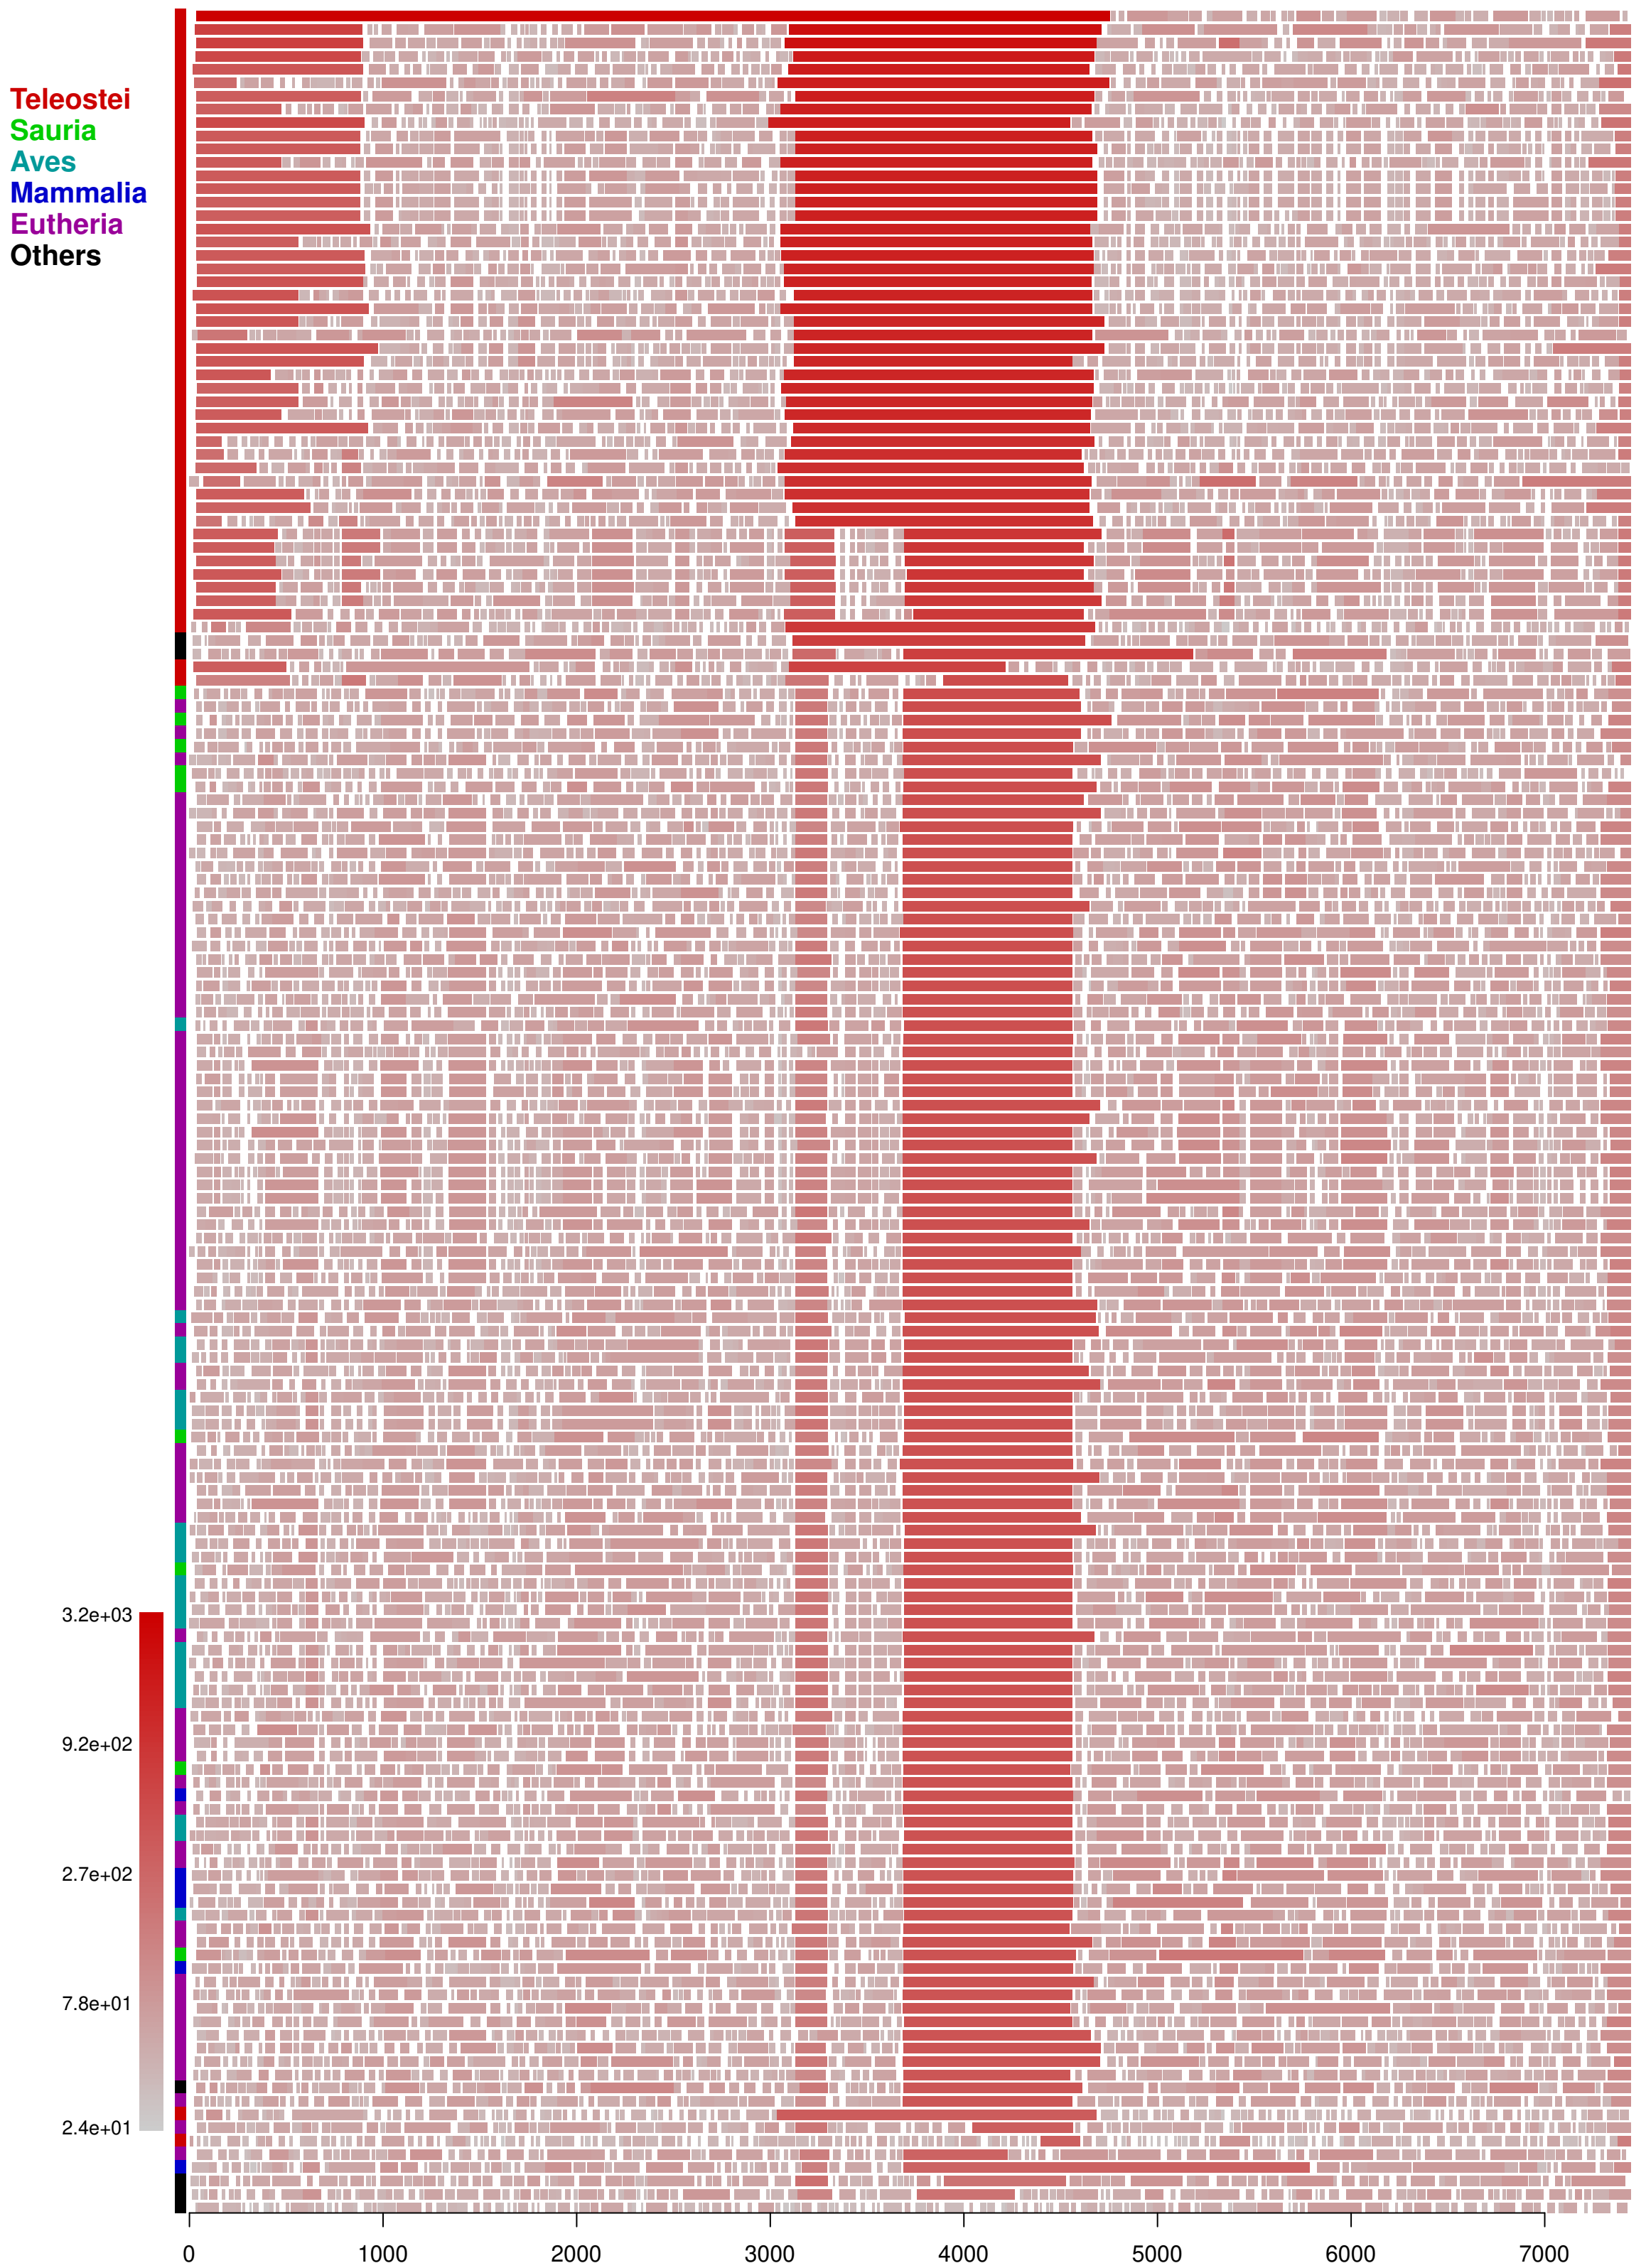

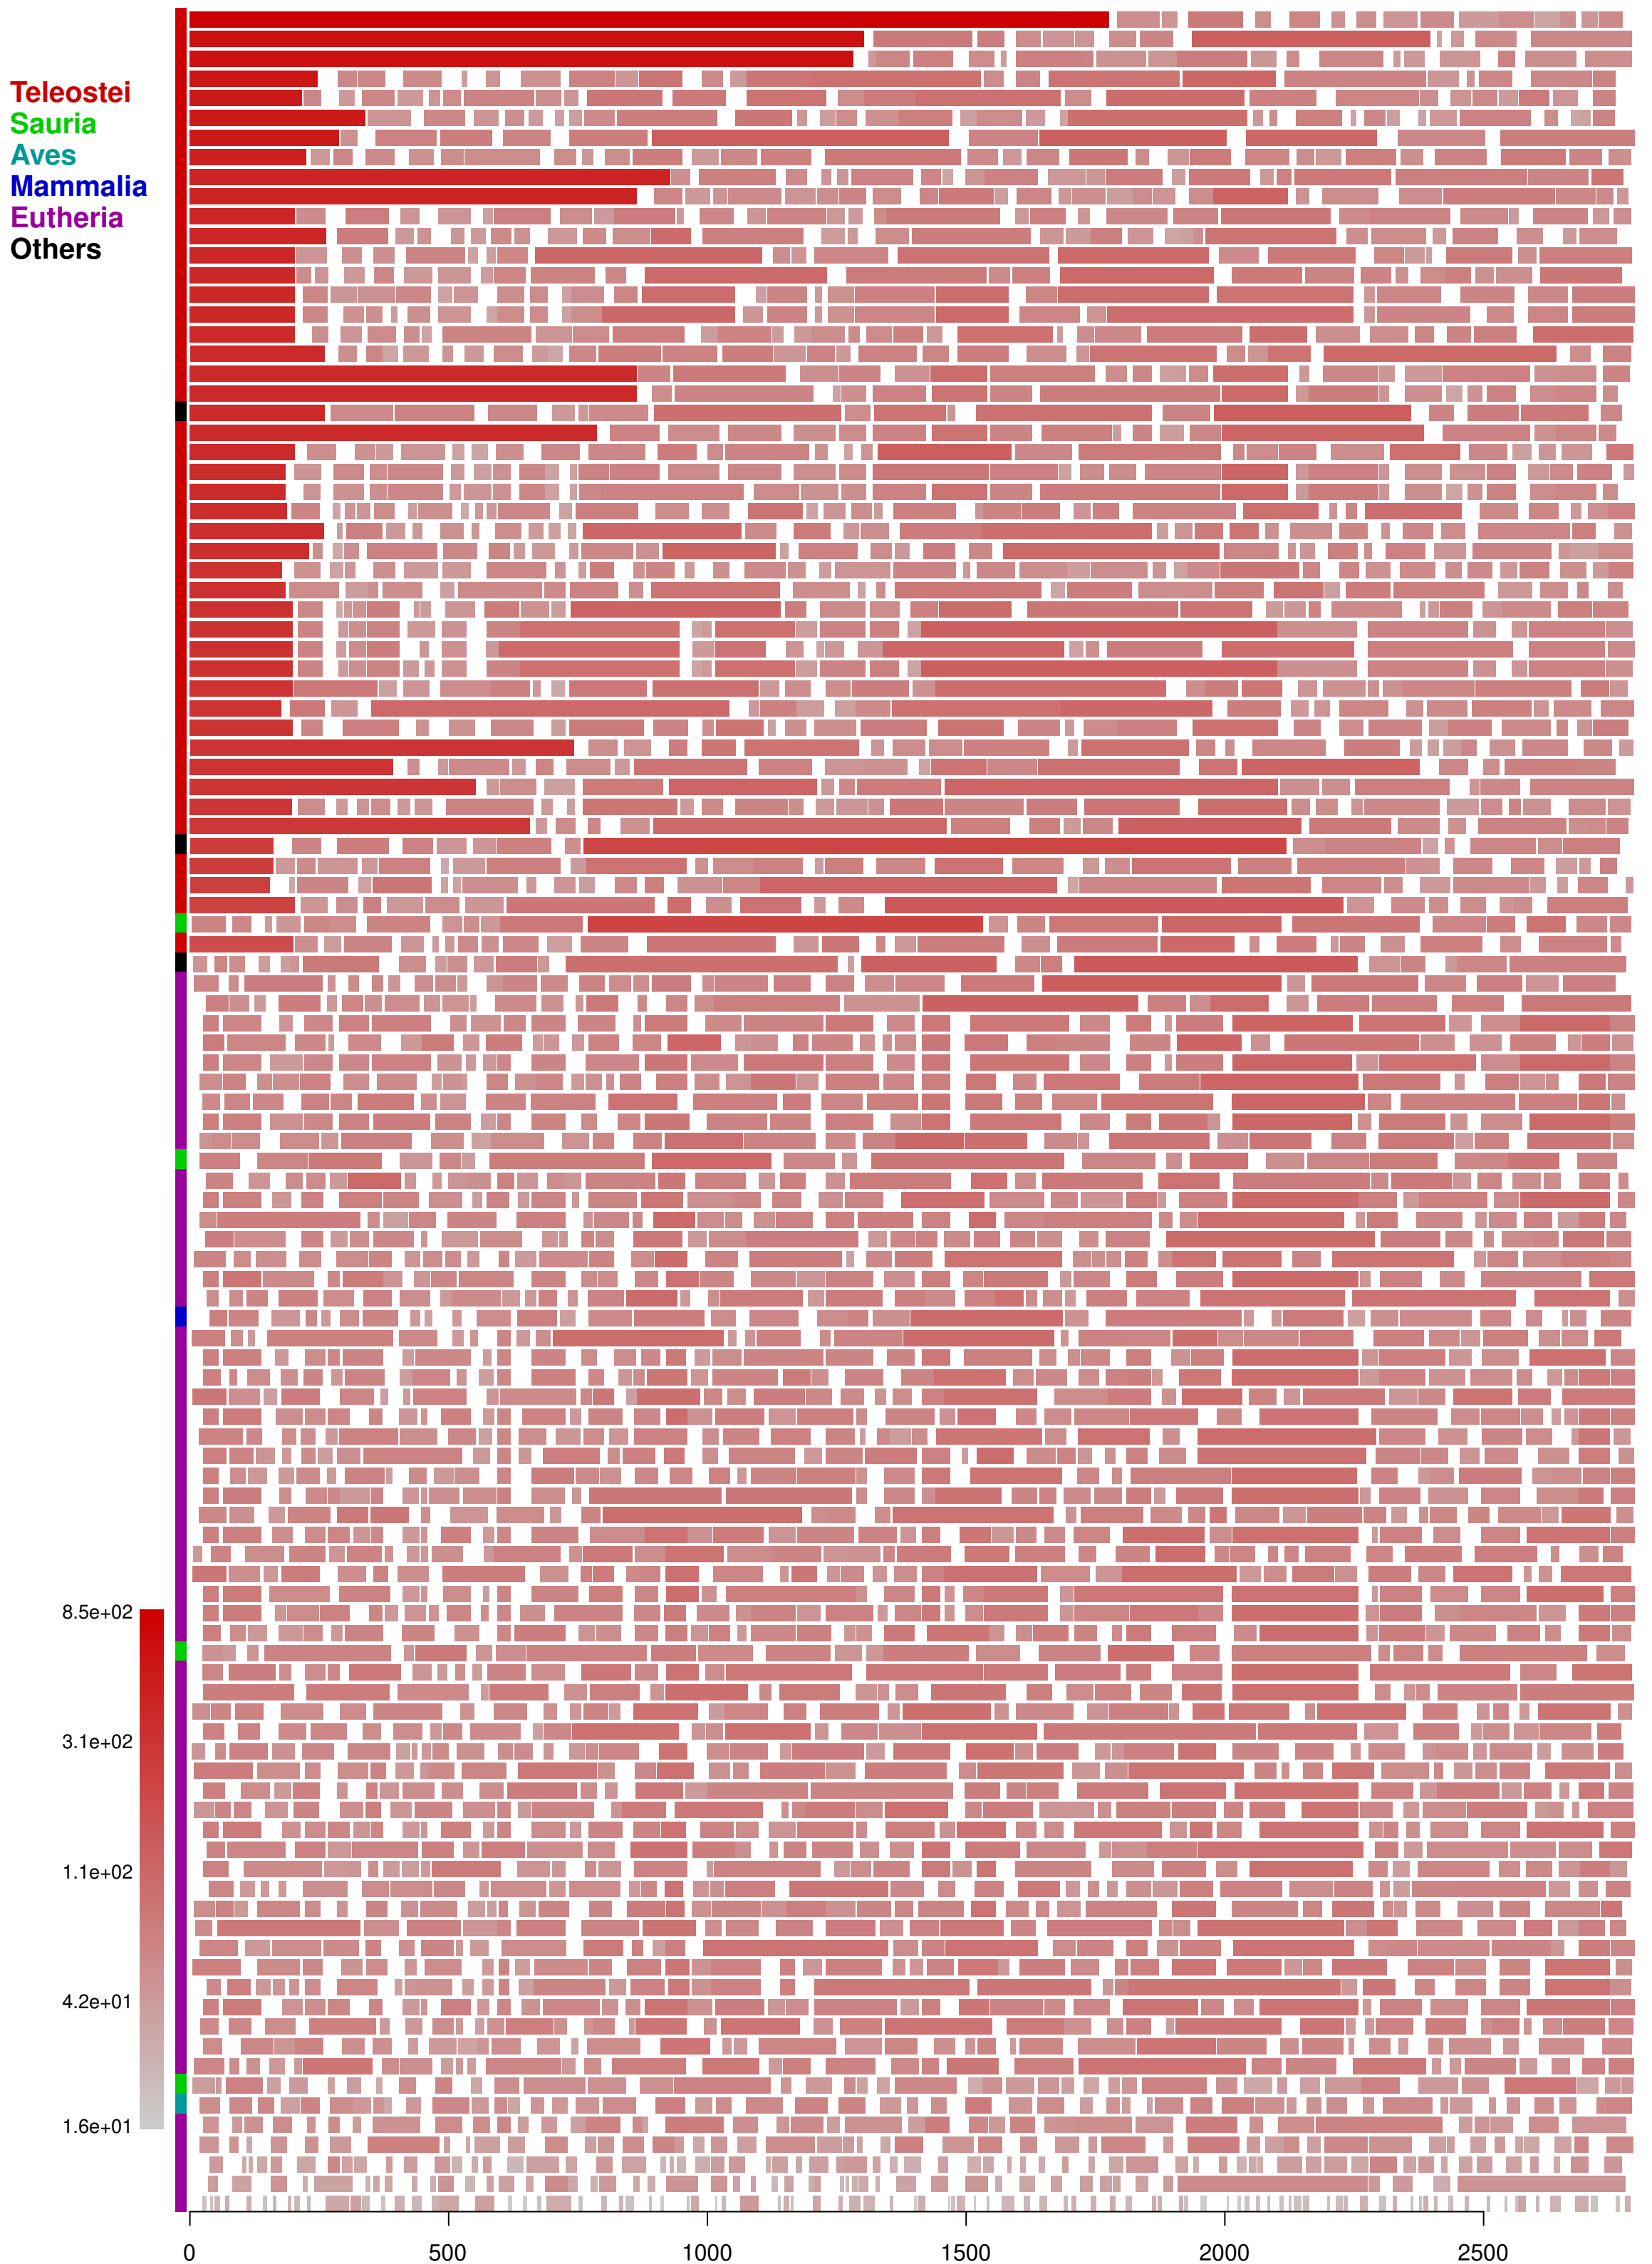

0 alignments above max size (1.0e+08)



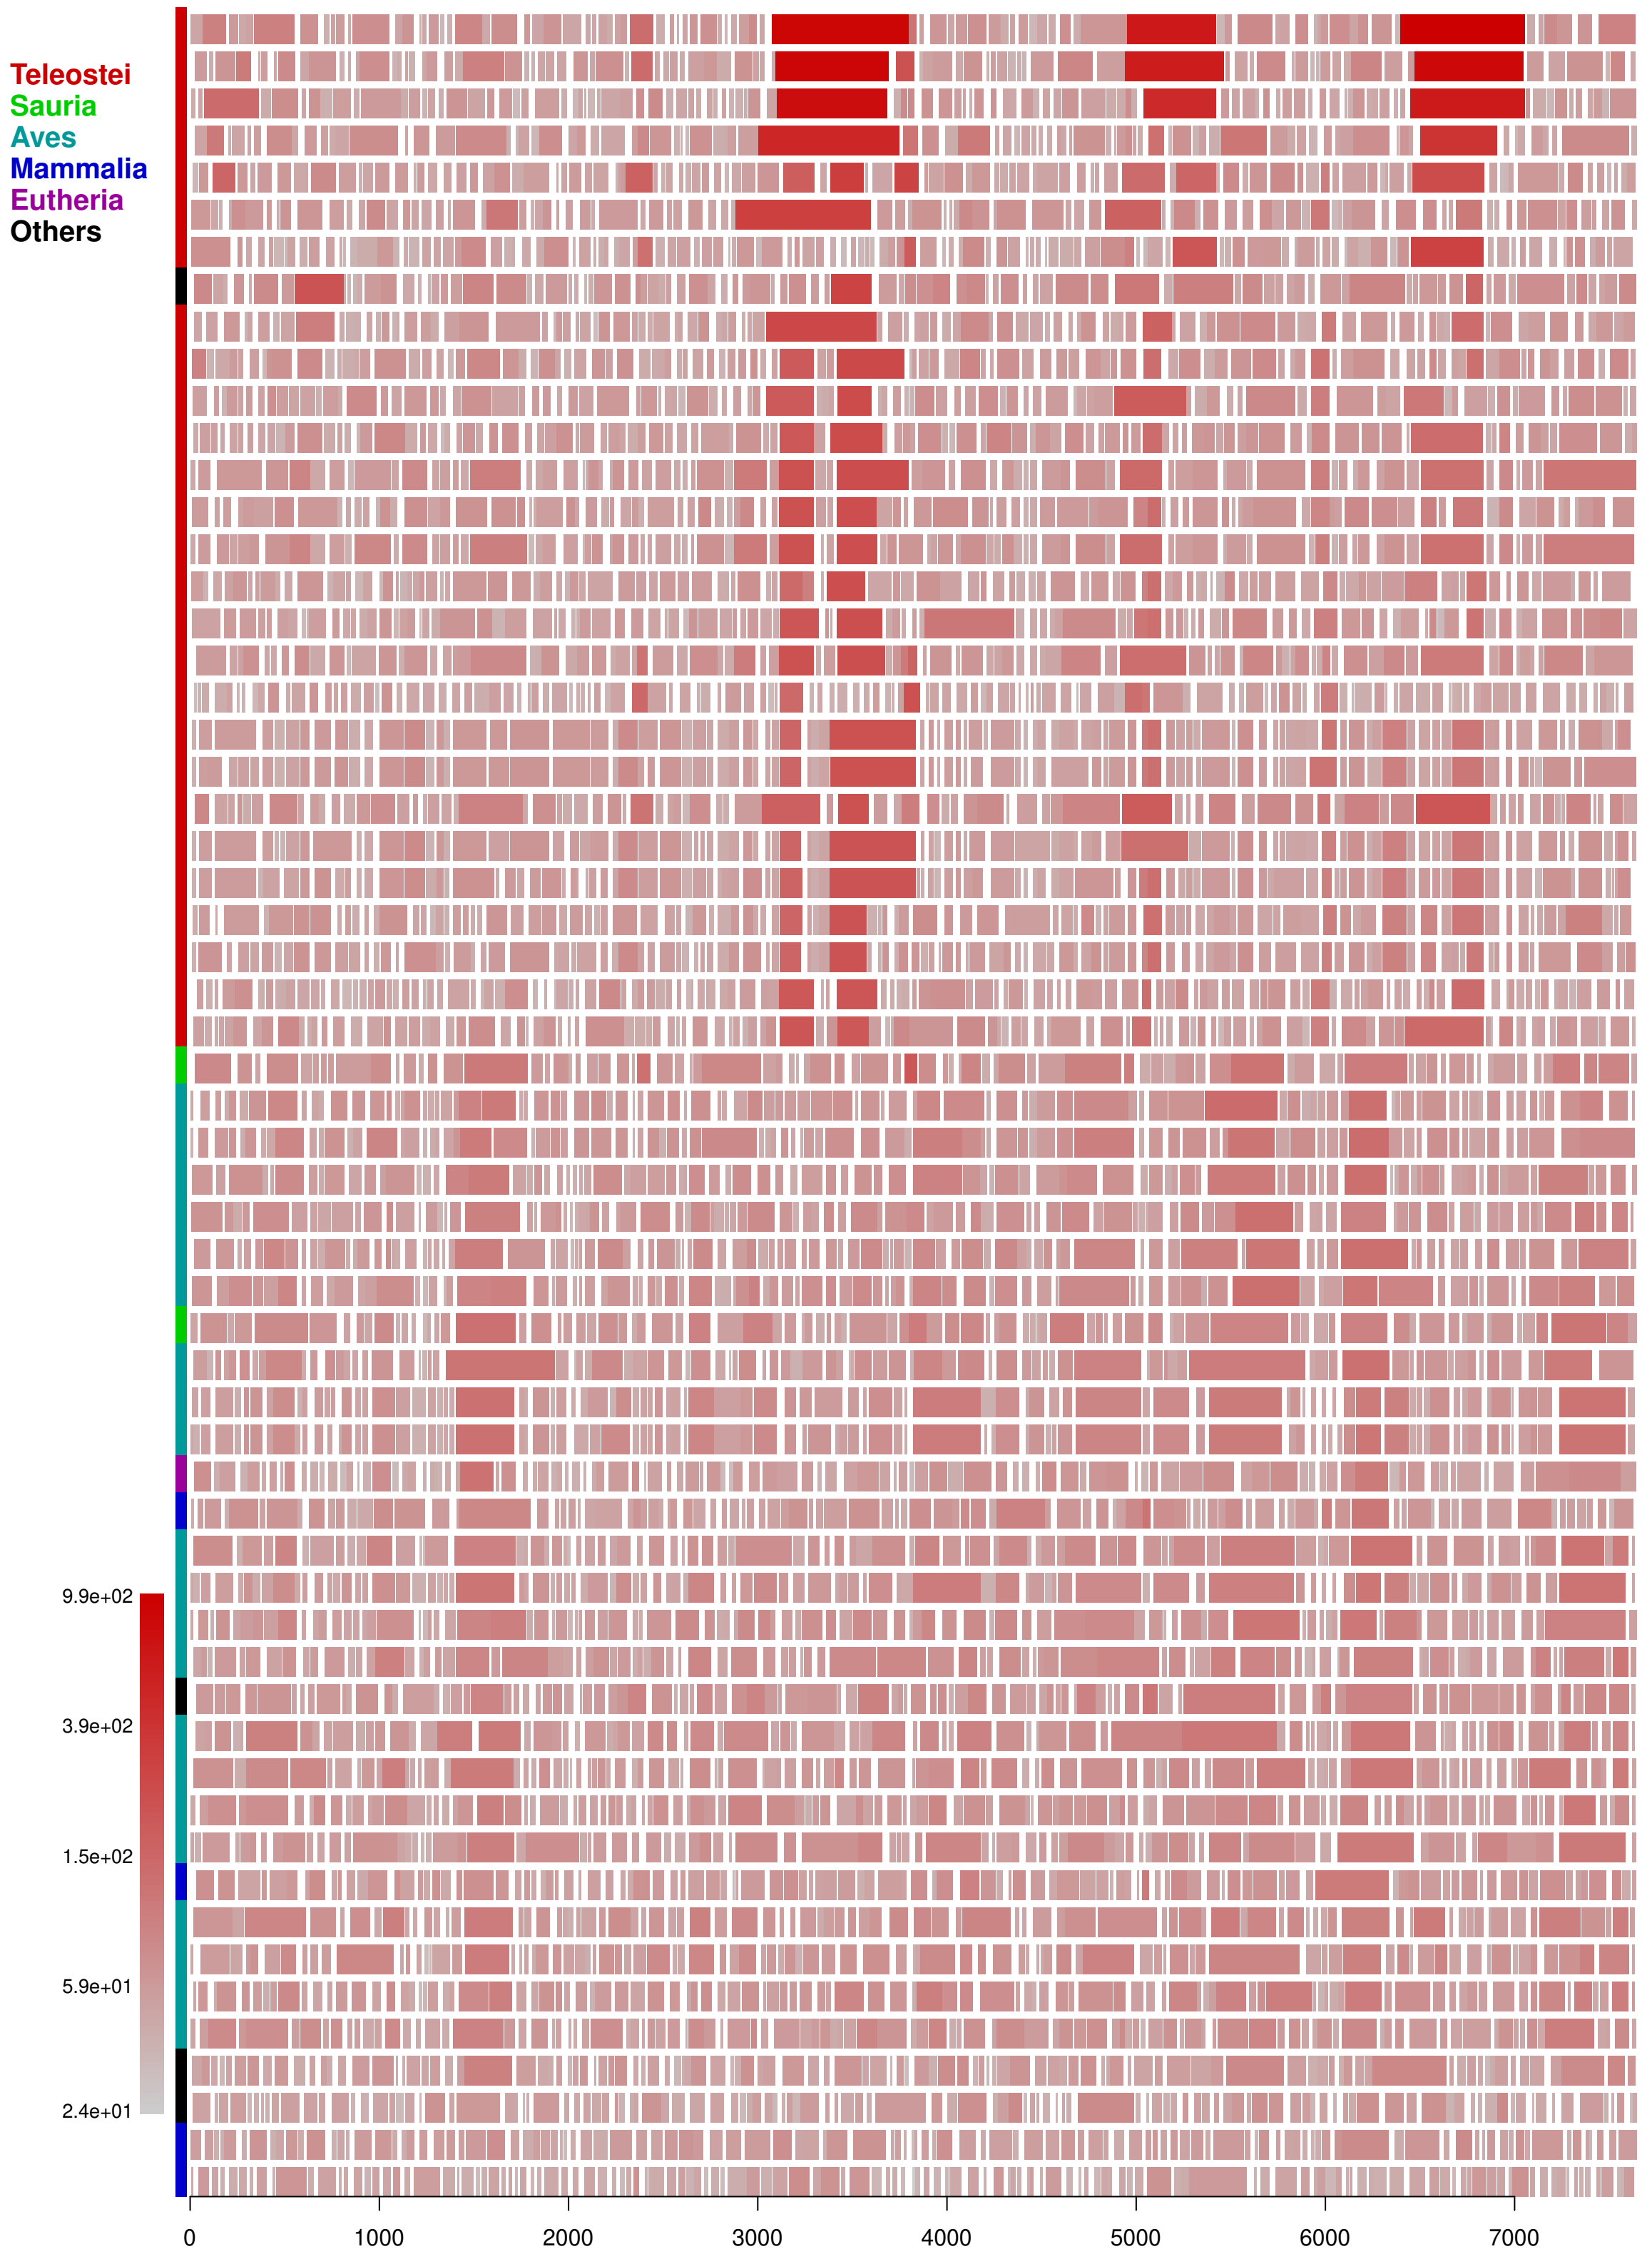

Teleostei  
Sauria  
Aves  
Mammalia  
Eutheria  
Others

2.1e+03  
6.2e+02  
1.8e+02  
5.2e+01  
1.6e+01

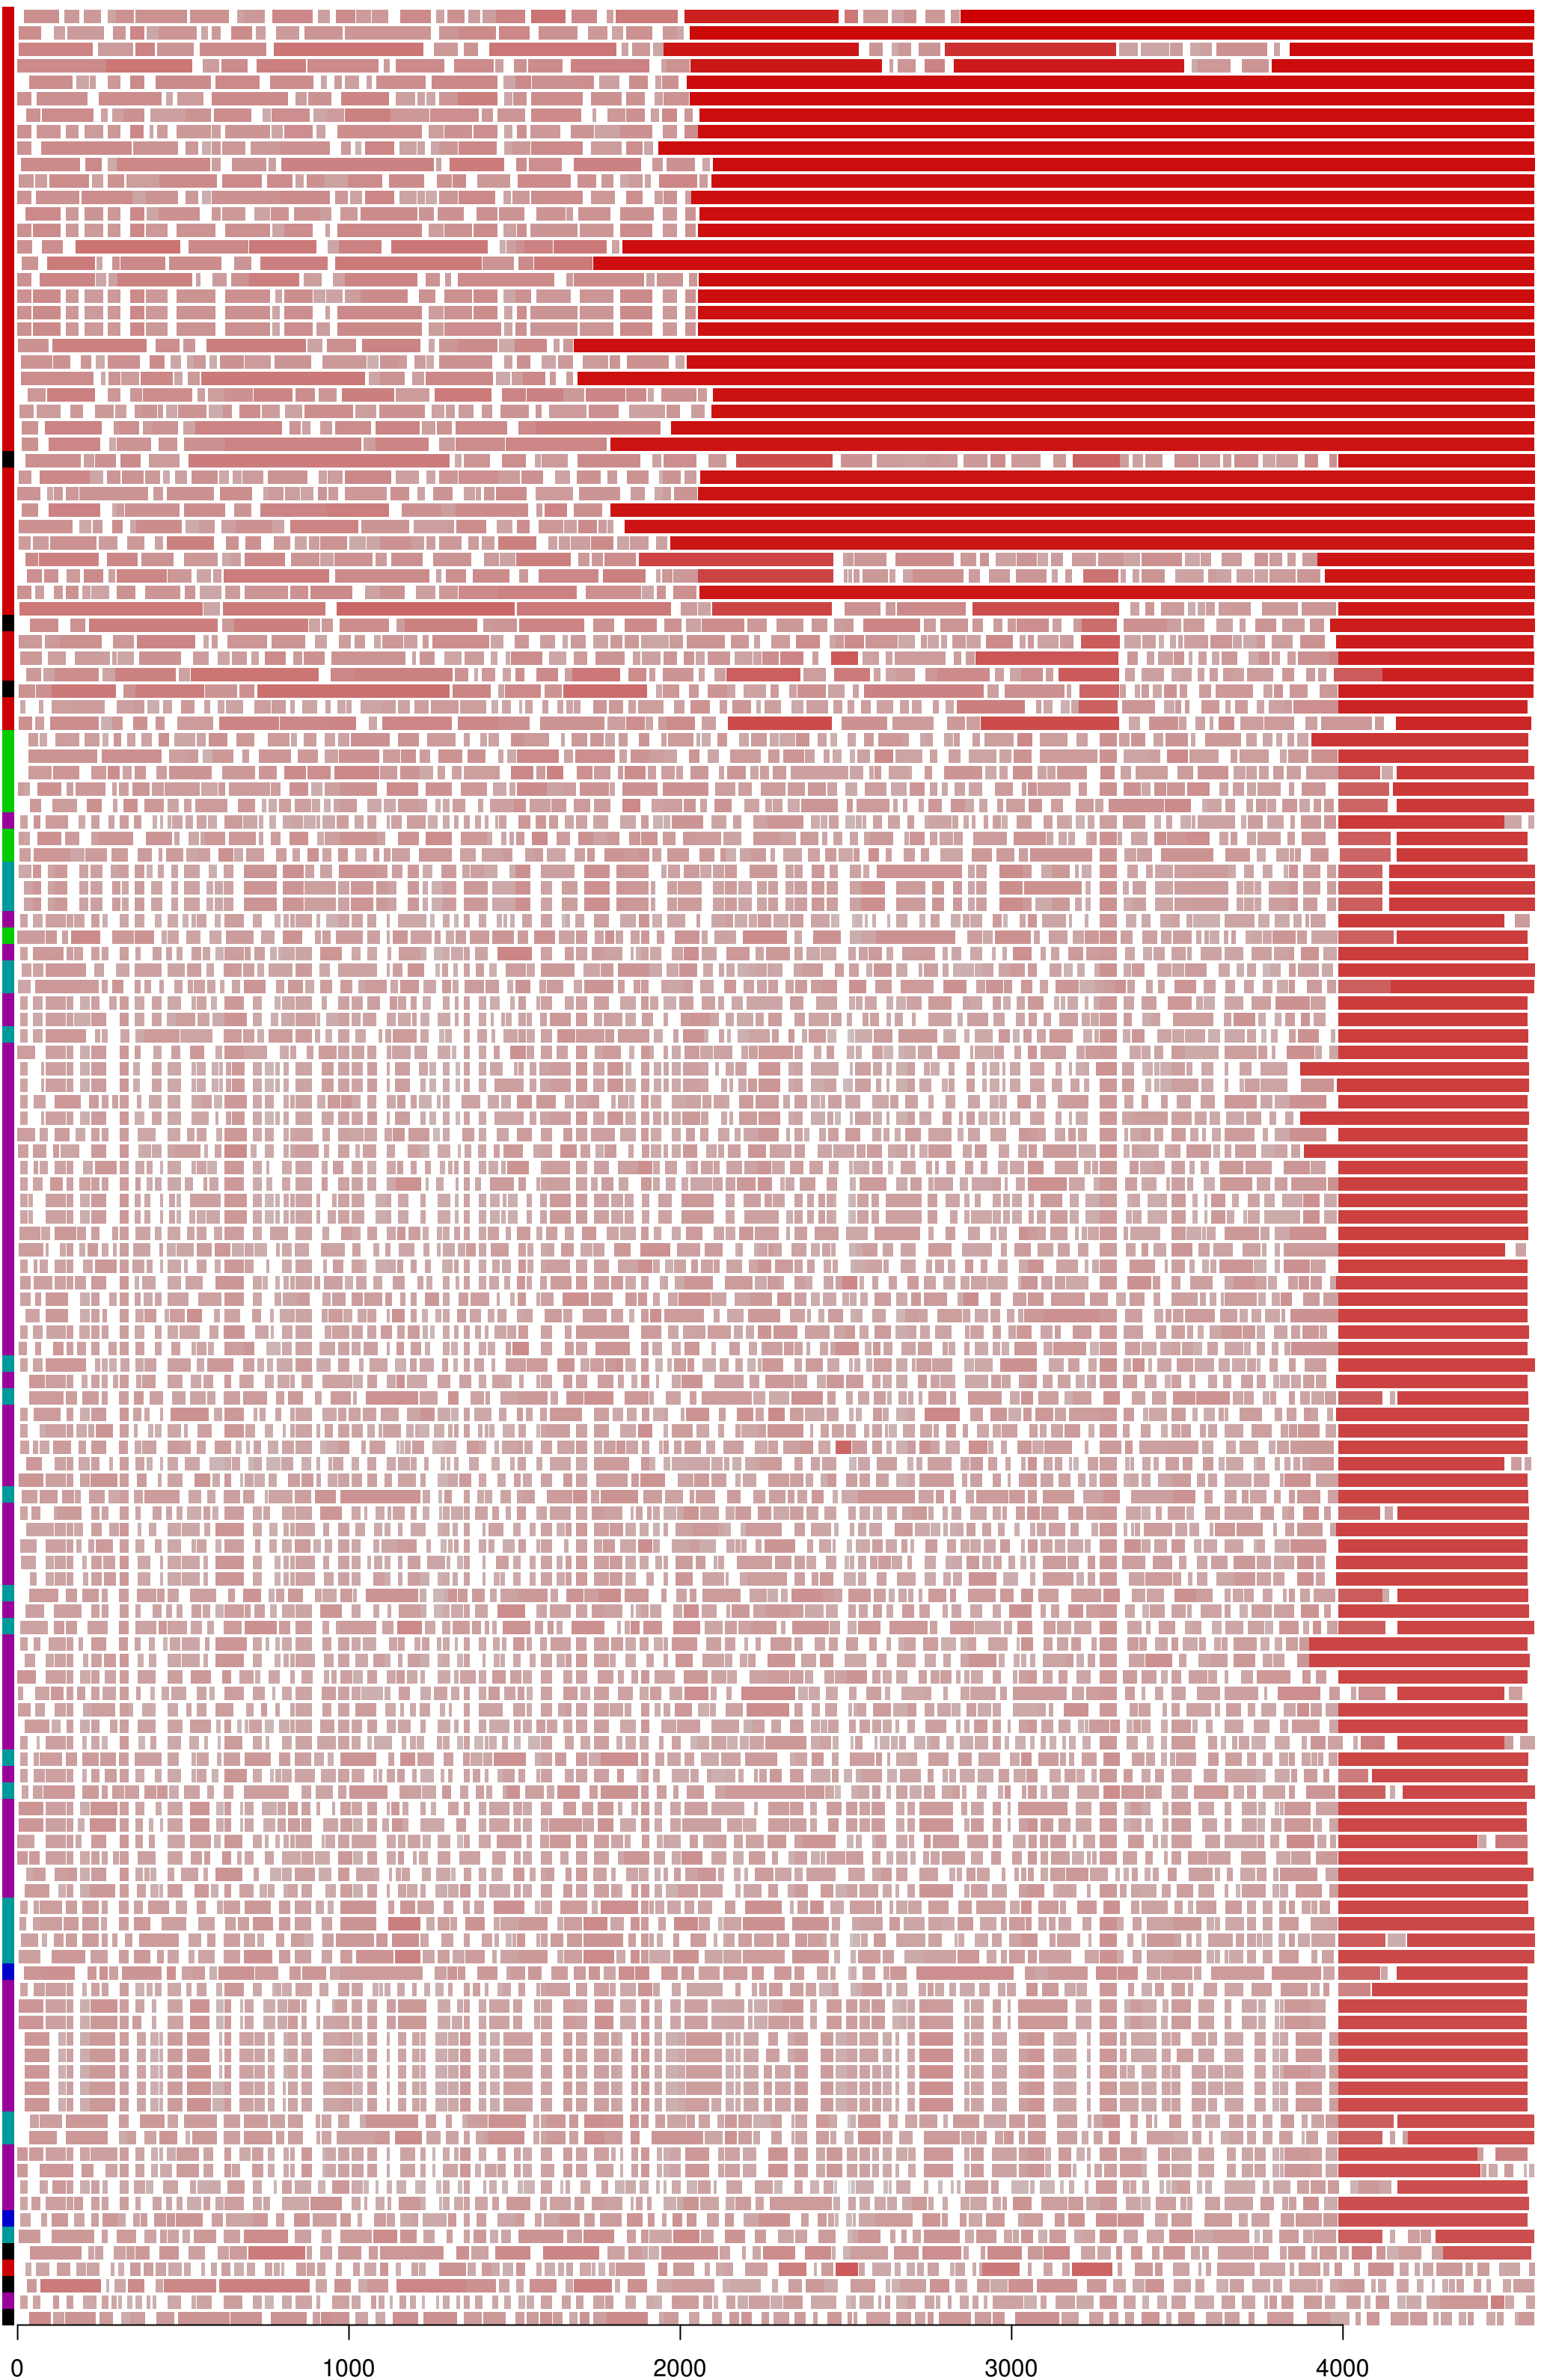

0 alignments above max size (1.0e+08)

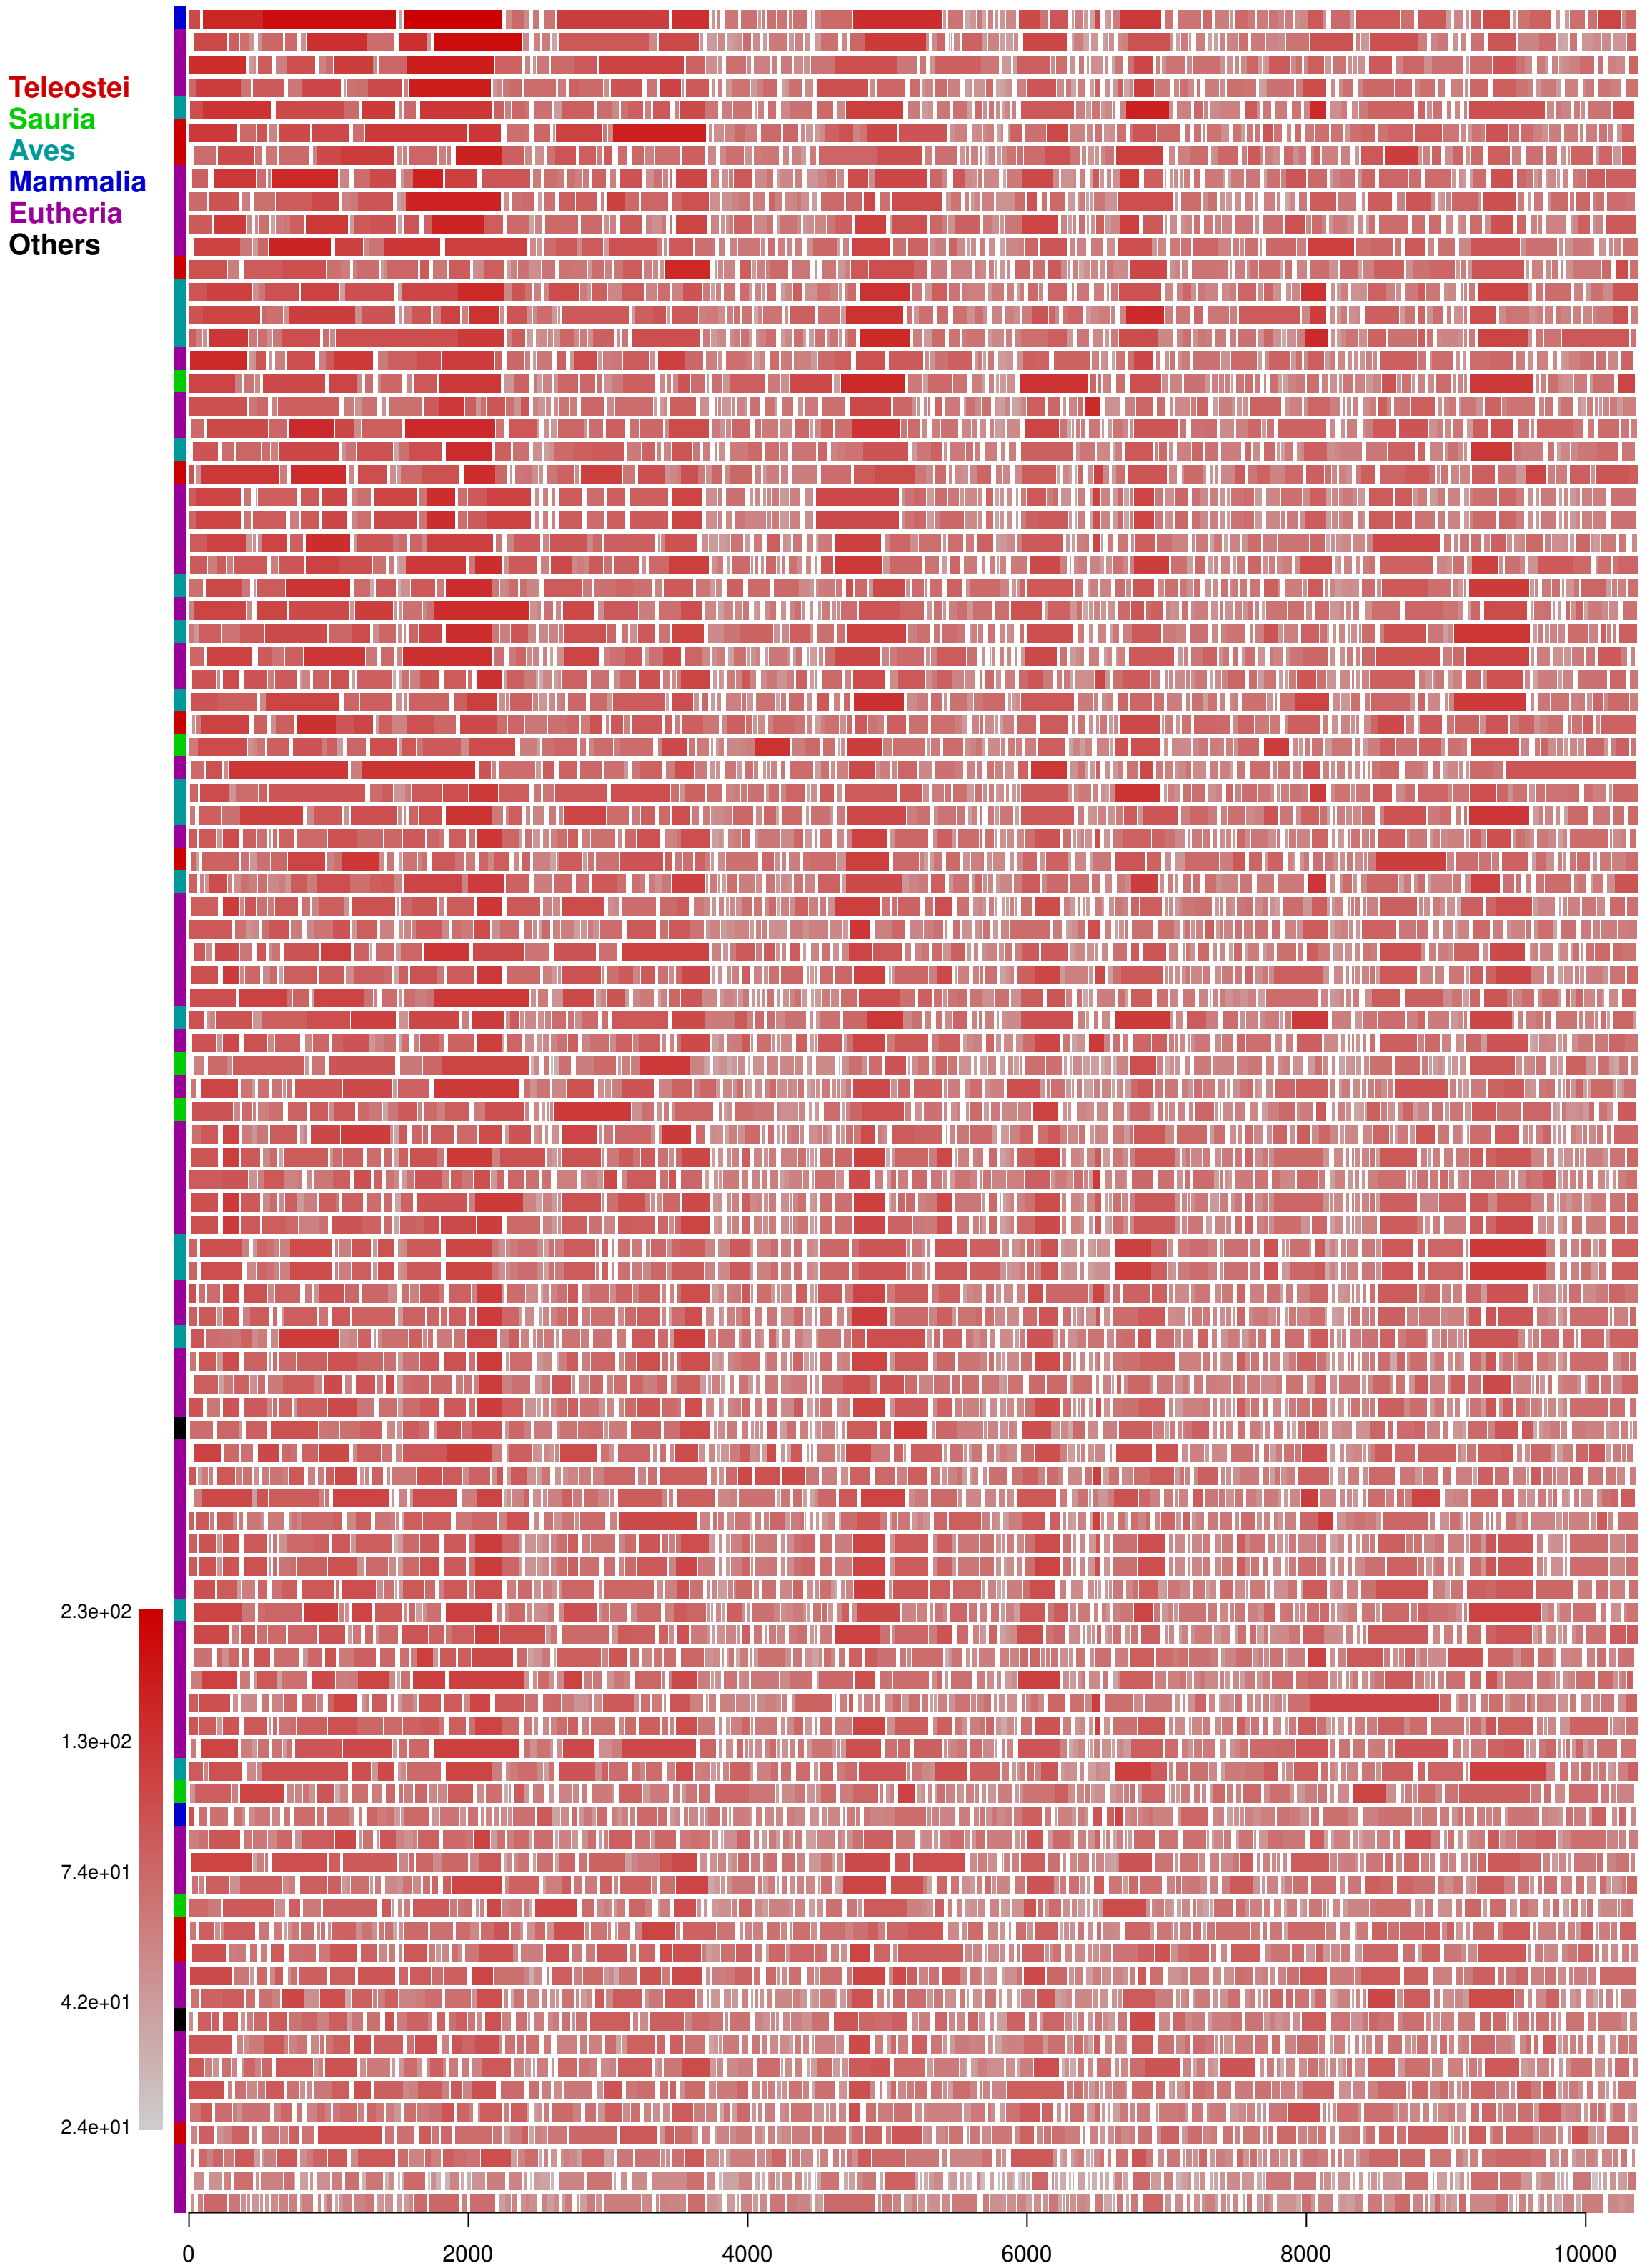

11 alignments above max size (1.0e+08)

Teleostei  
Sauria  
Aves  
Mammalia  
Eutheria  
Others

2.2e+03  
6.6e+02  
2.0e+02  
6.2e+01  
2.0e+01

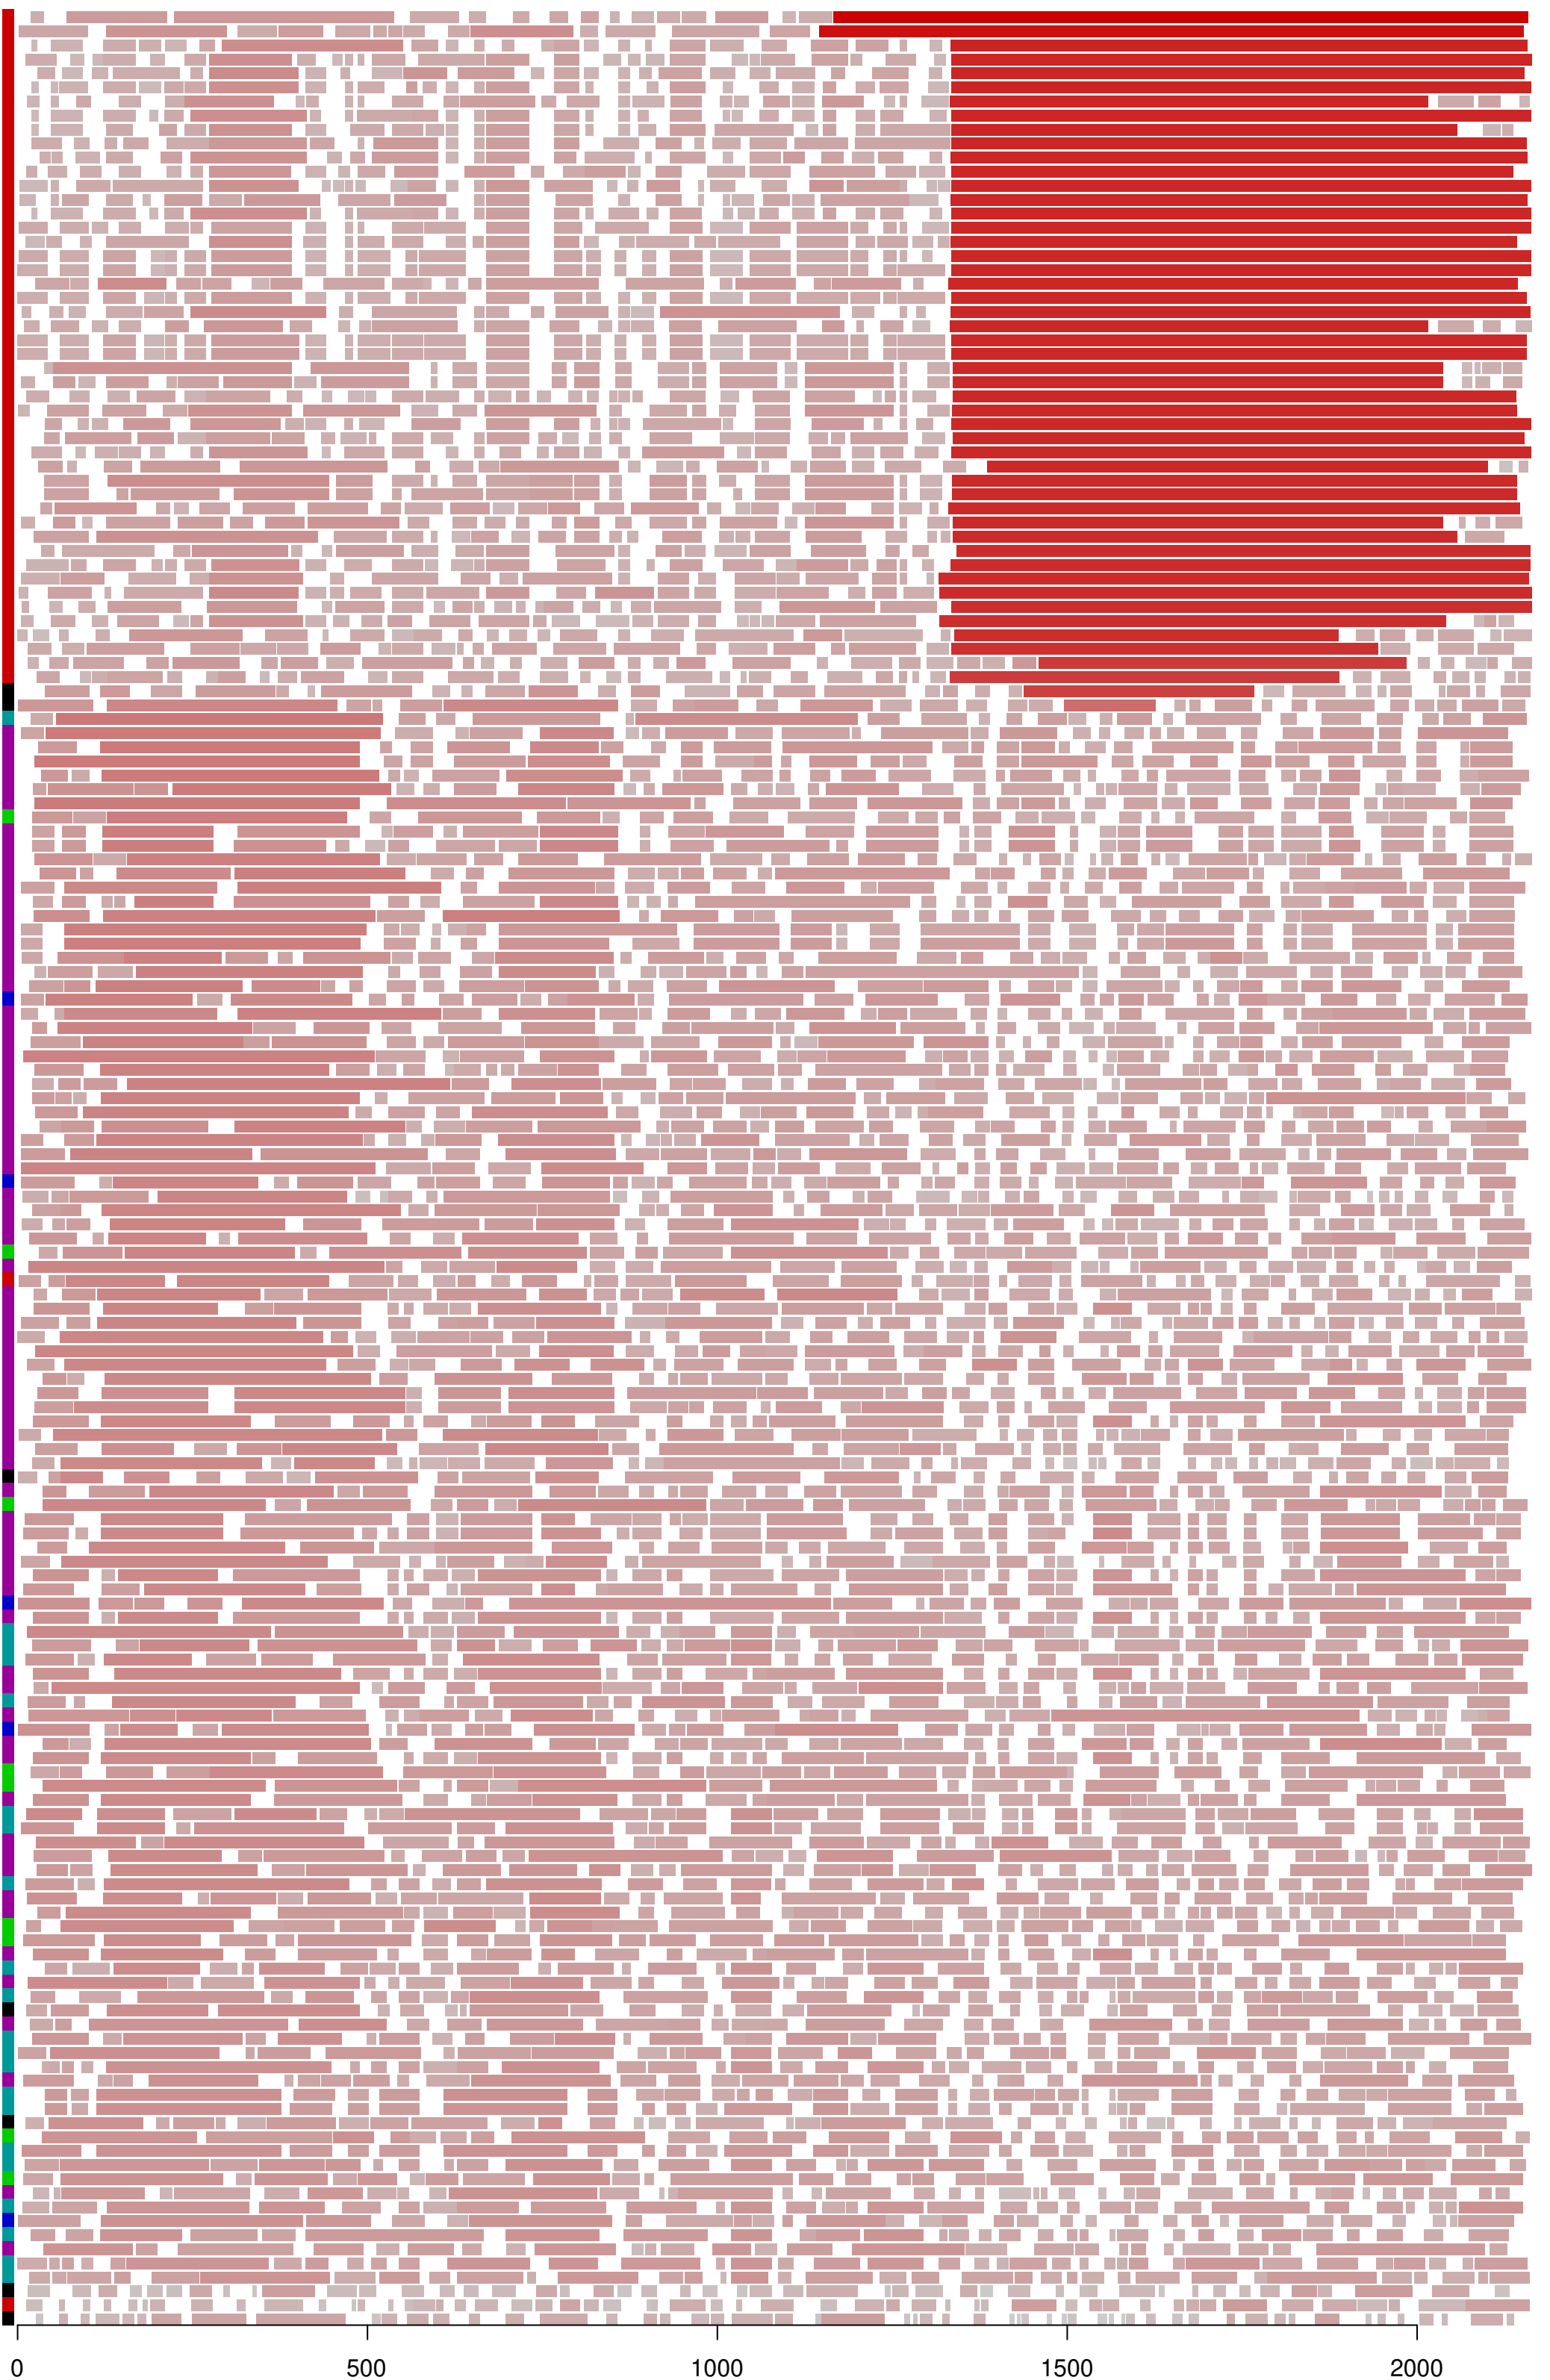

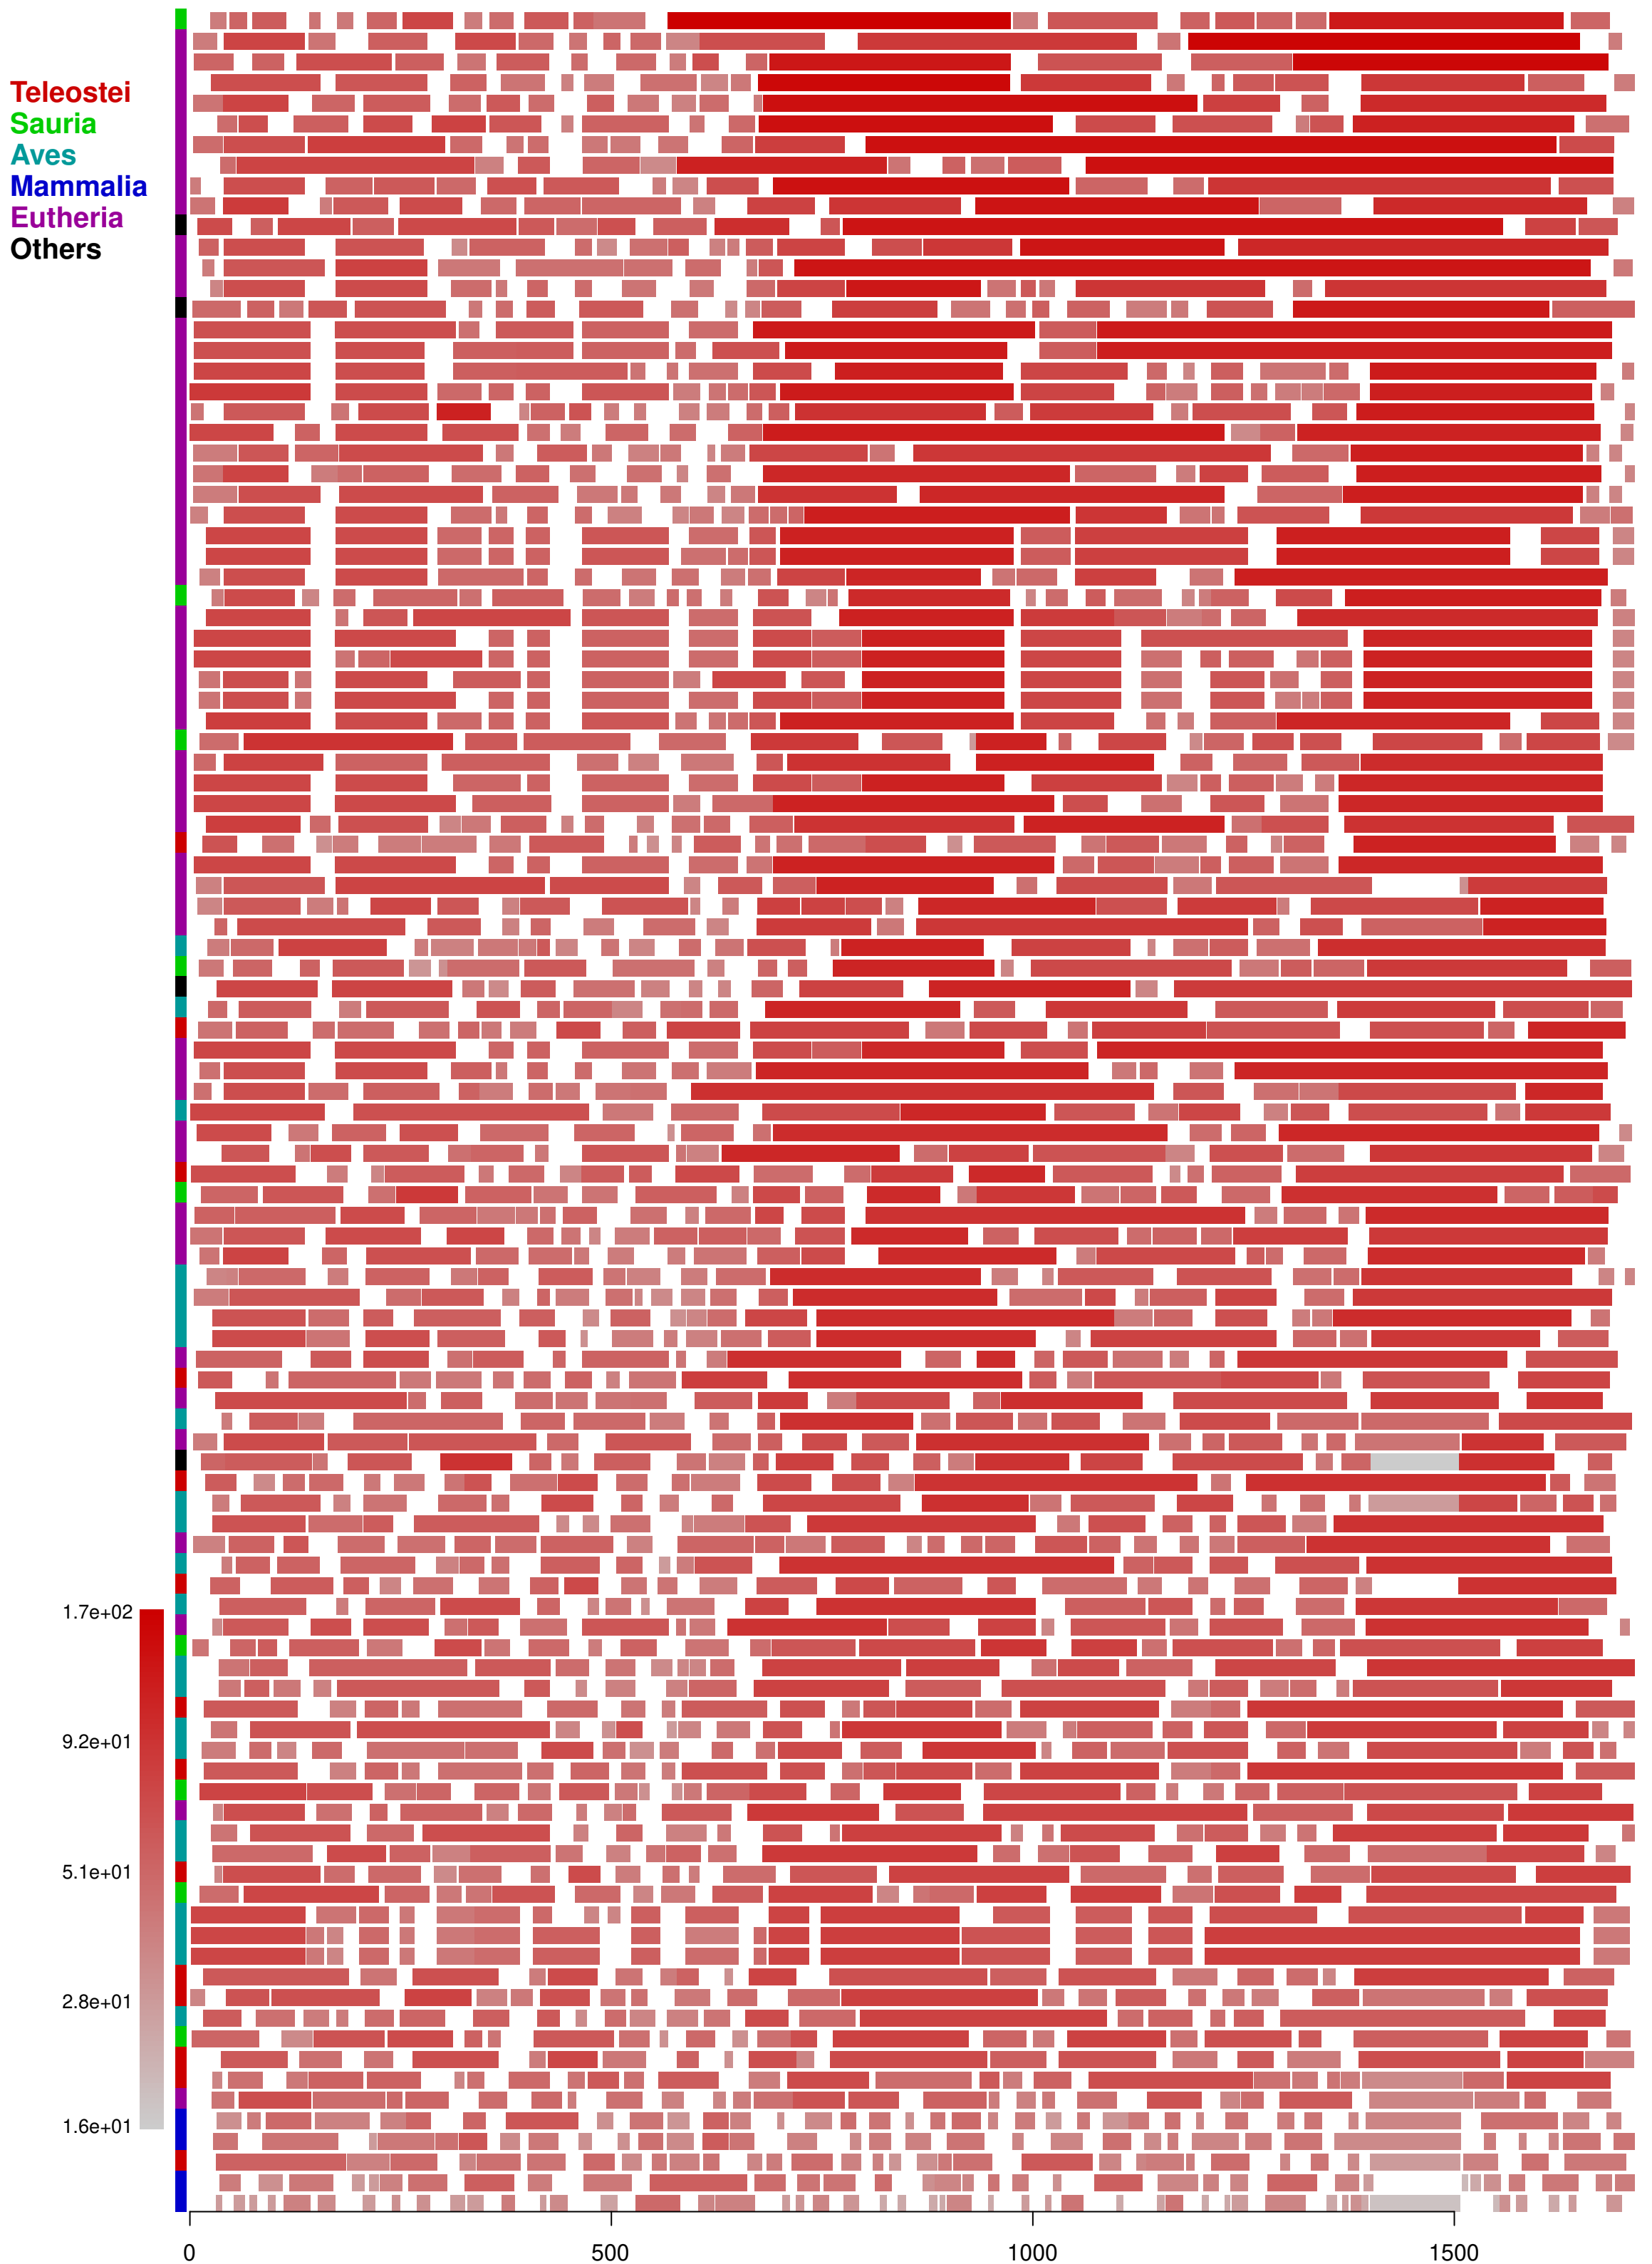

0 alignments above max size (1.0e+08)

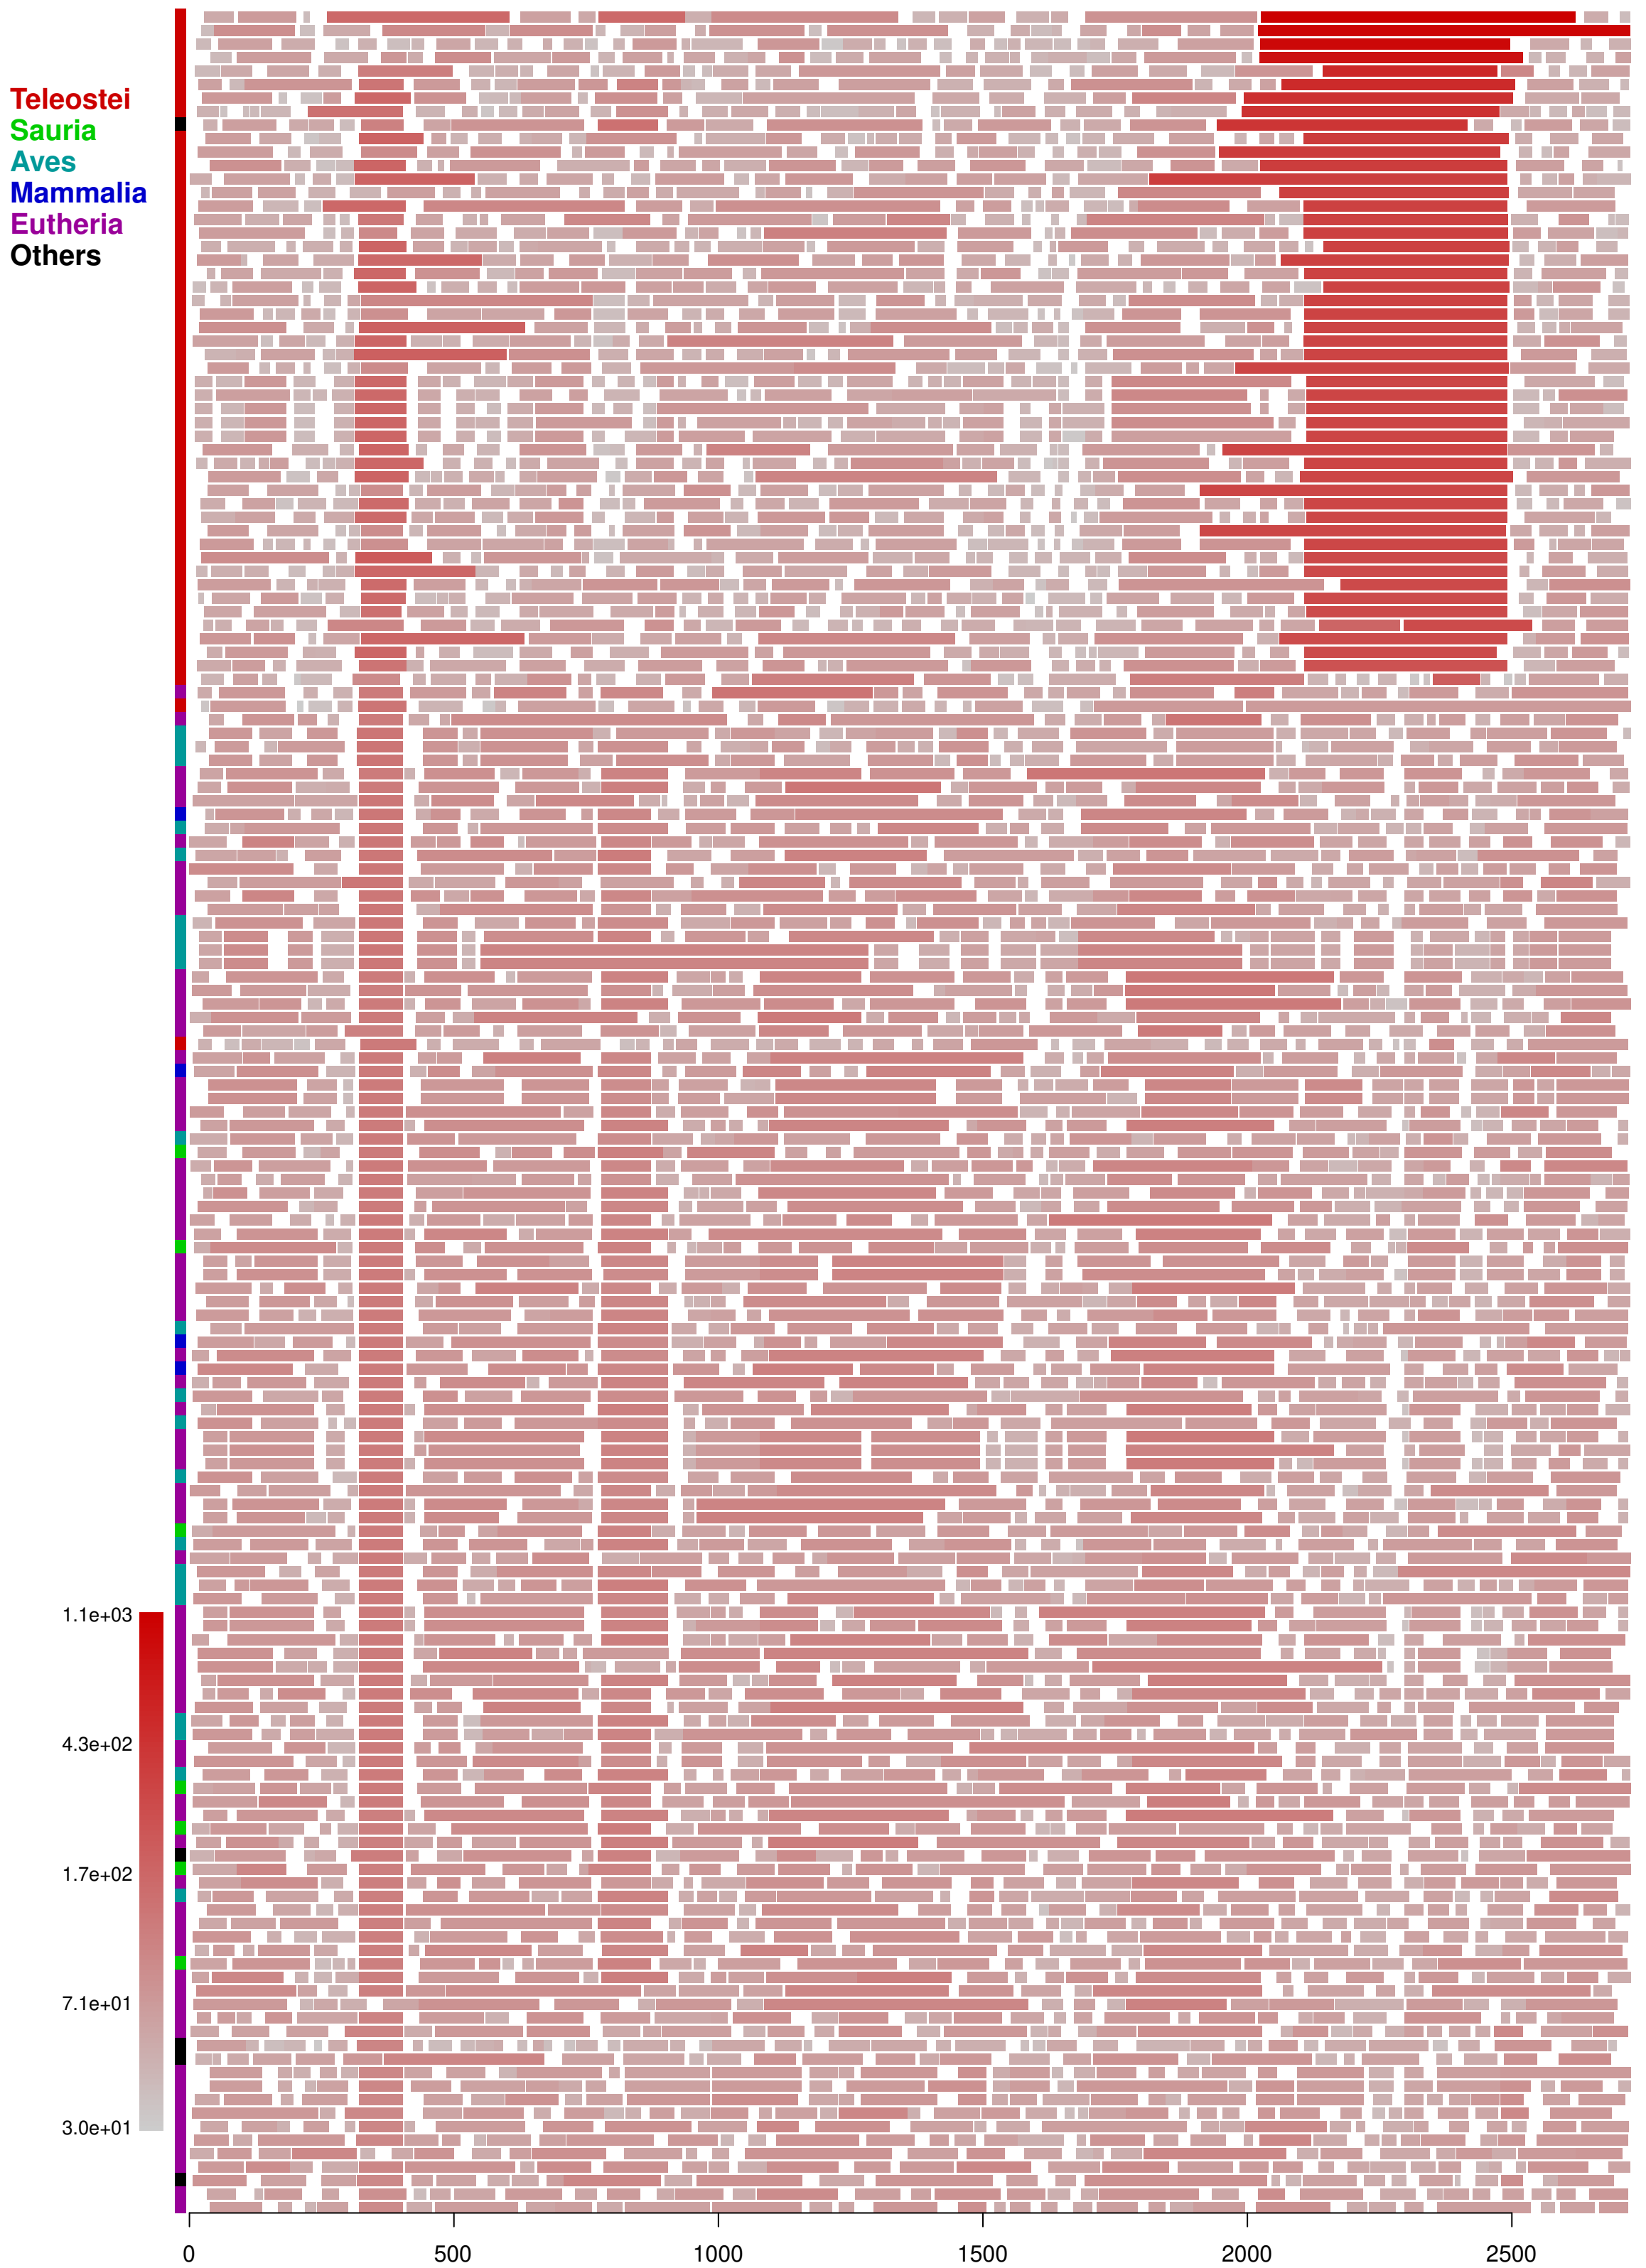

Teleostei  
Sauria  
Aves  
Mammalia  
Eutheria  
Others

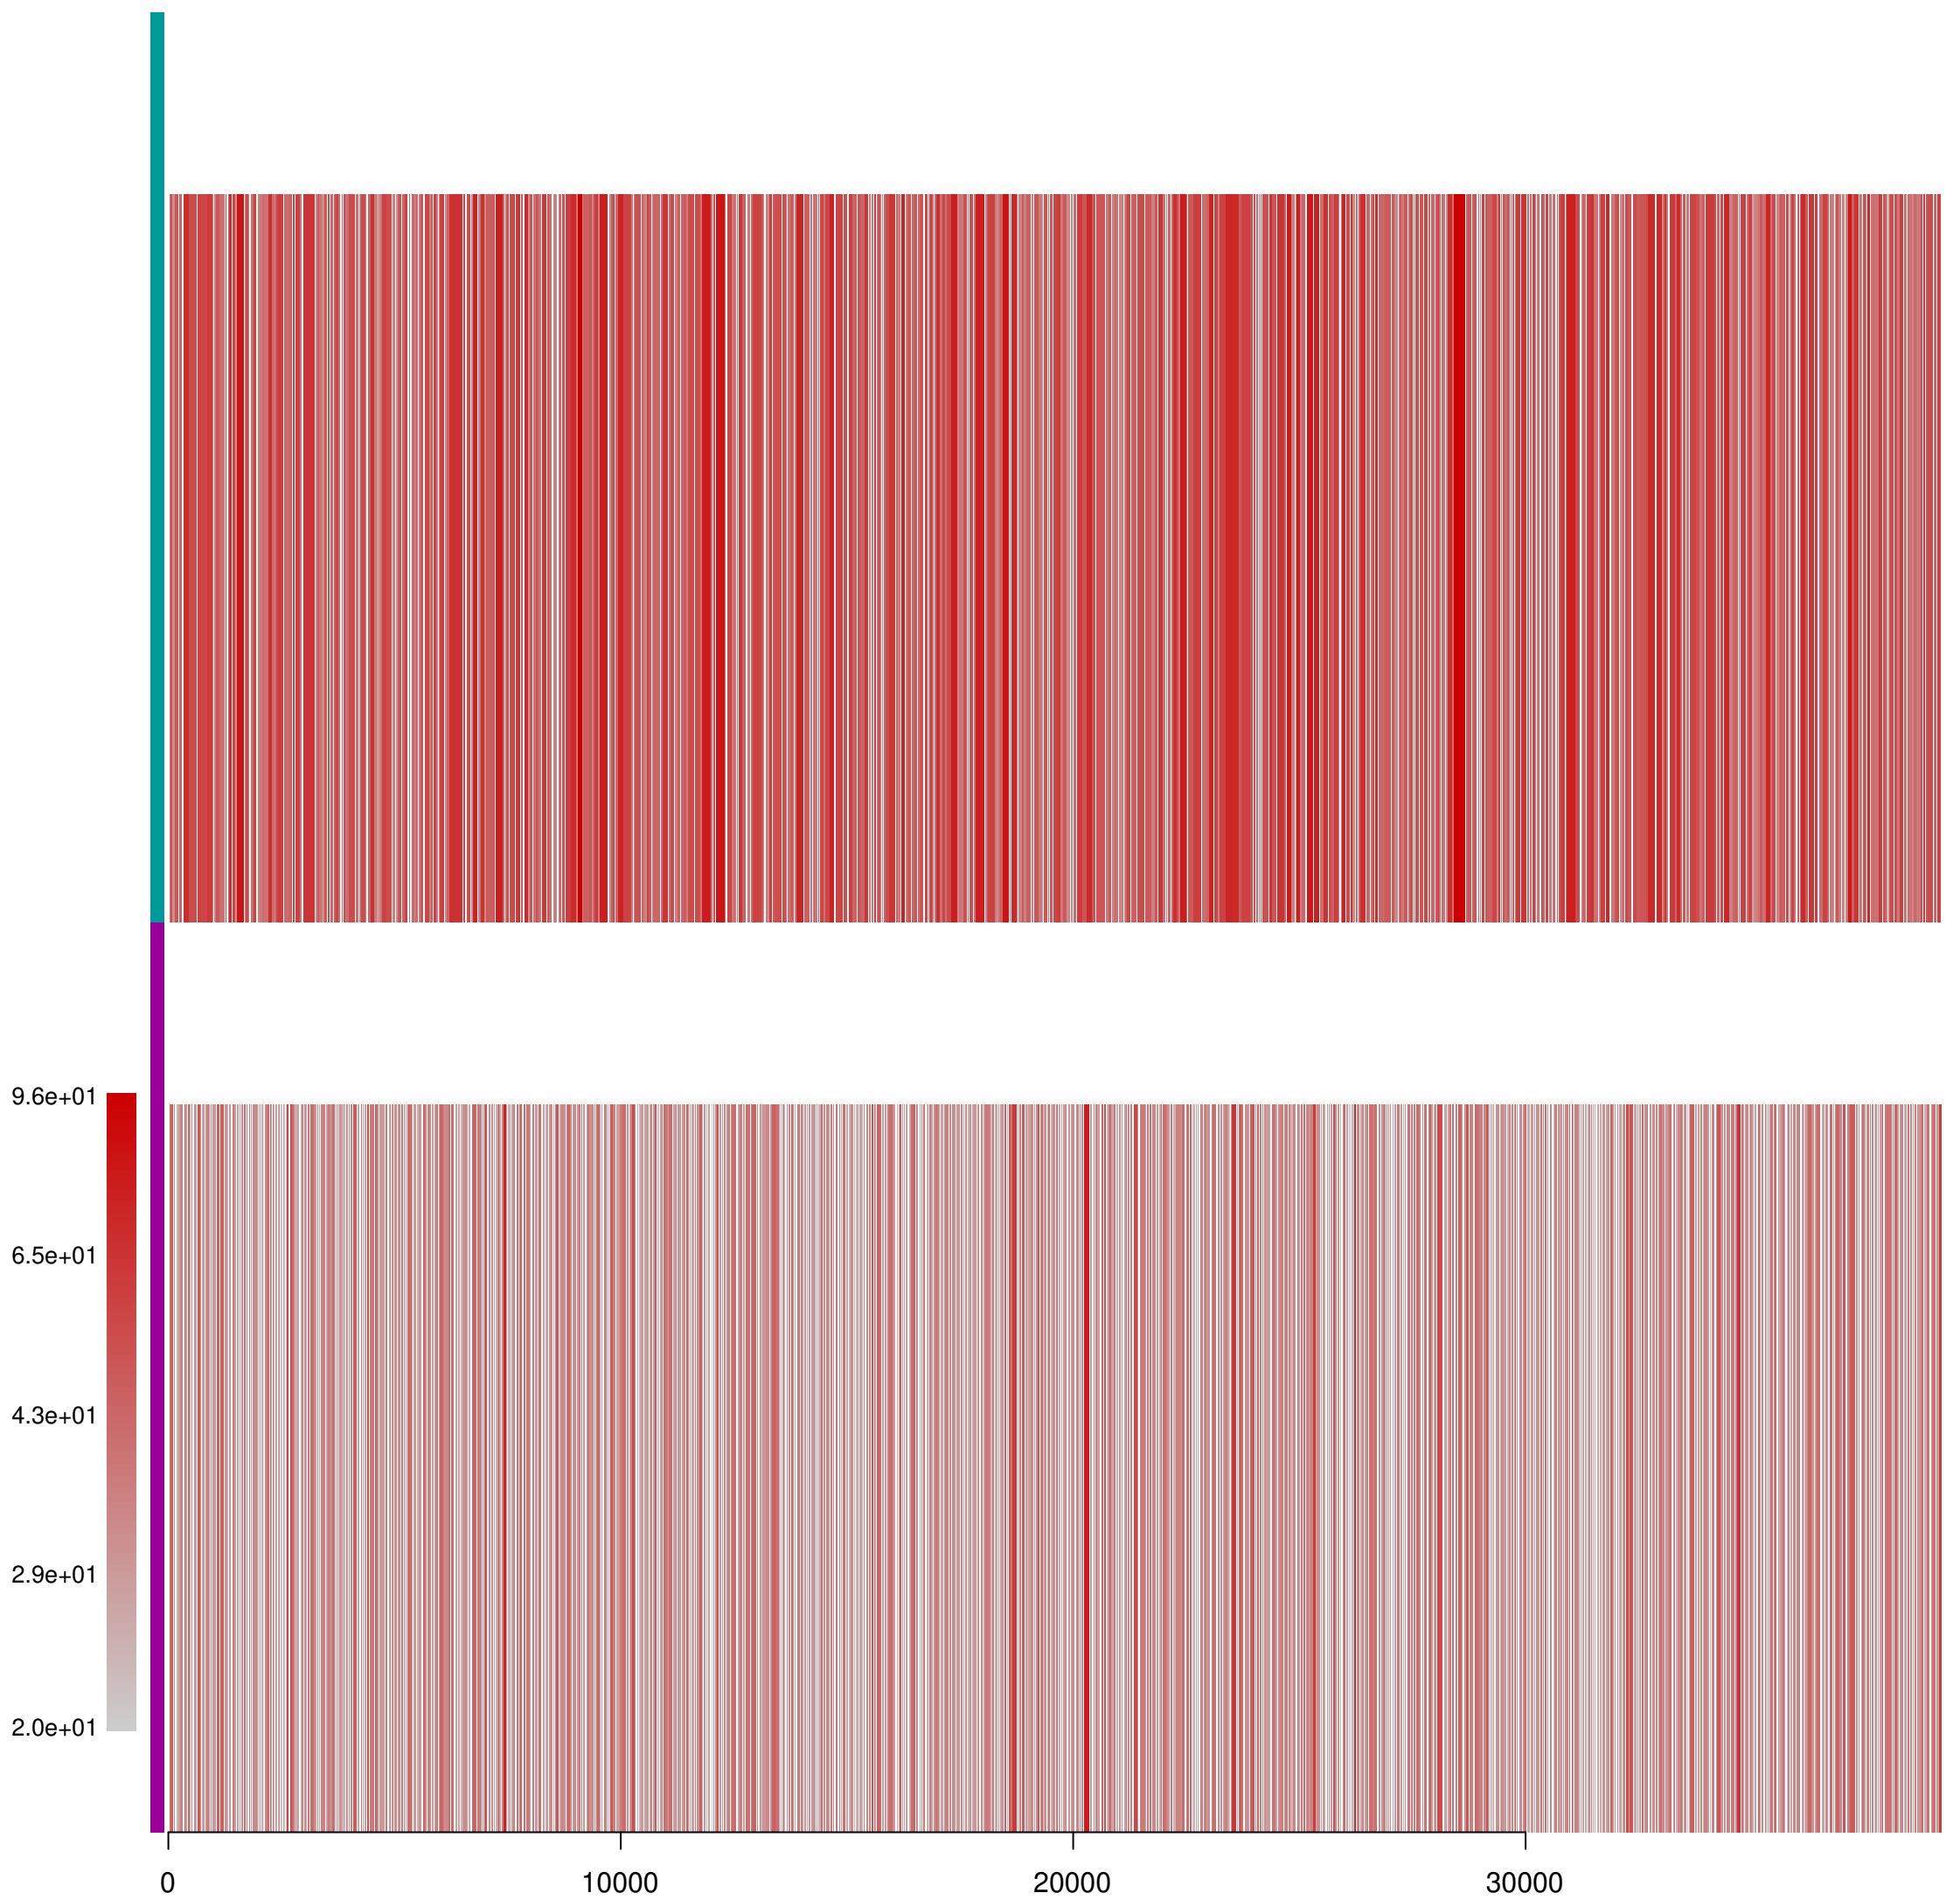

119 alignments above max size (1.0e+08)

Teleostei  
Sauria  
Aves  
Mammalia  
Eutheria  
Others

5.7e+02  
2.6e+02  
1.2e+02  
5.5e+01  
2.6e+01

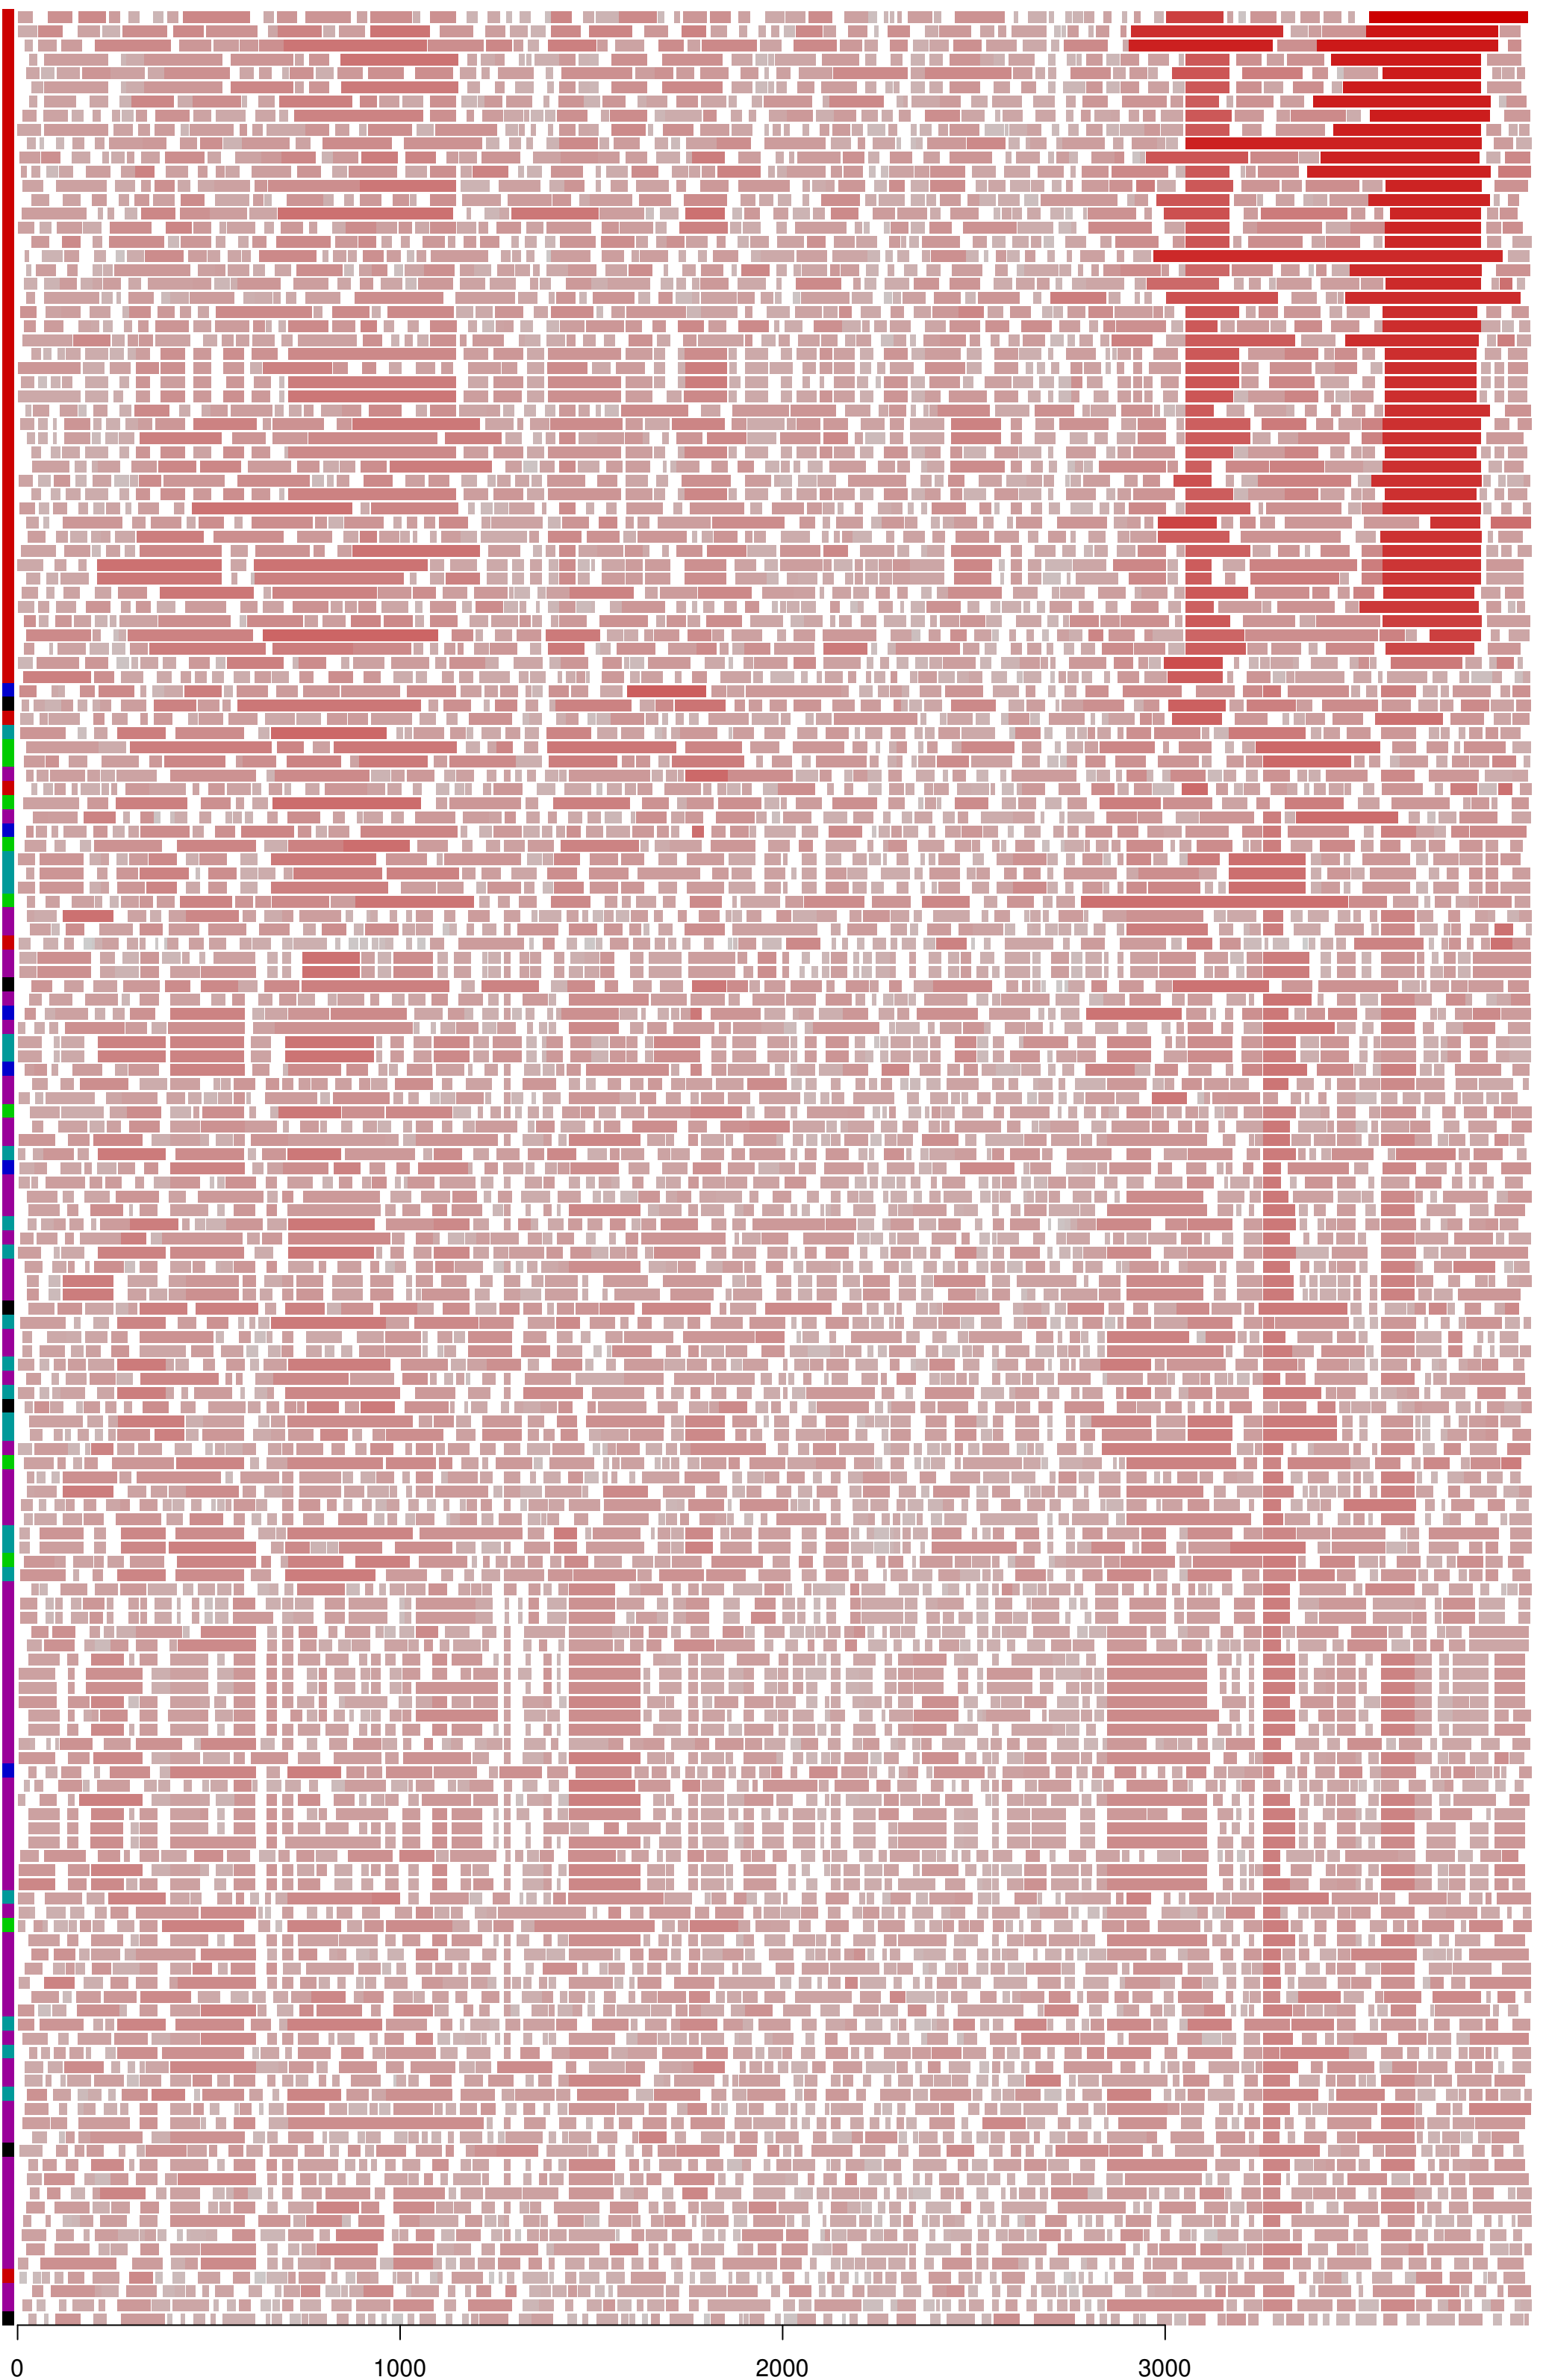

0 alignments above max size (1.0e+08)



Teleostei  
Sauria  
Aves  
Mammalia  
Eutheria  
Others

1.8e+03  
5.5e+02  
1.7e+02  
5.0e+01  
1.6e+01

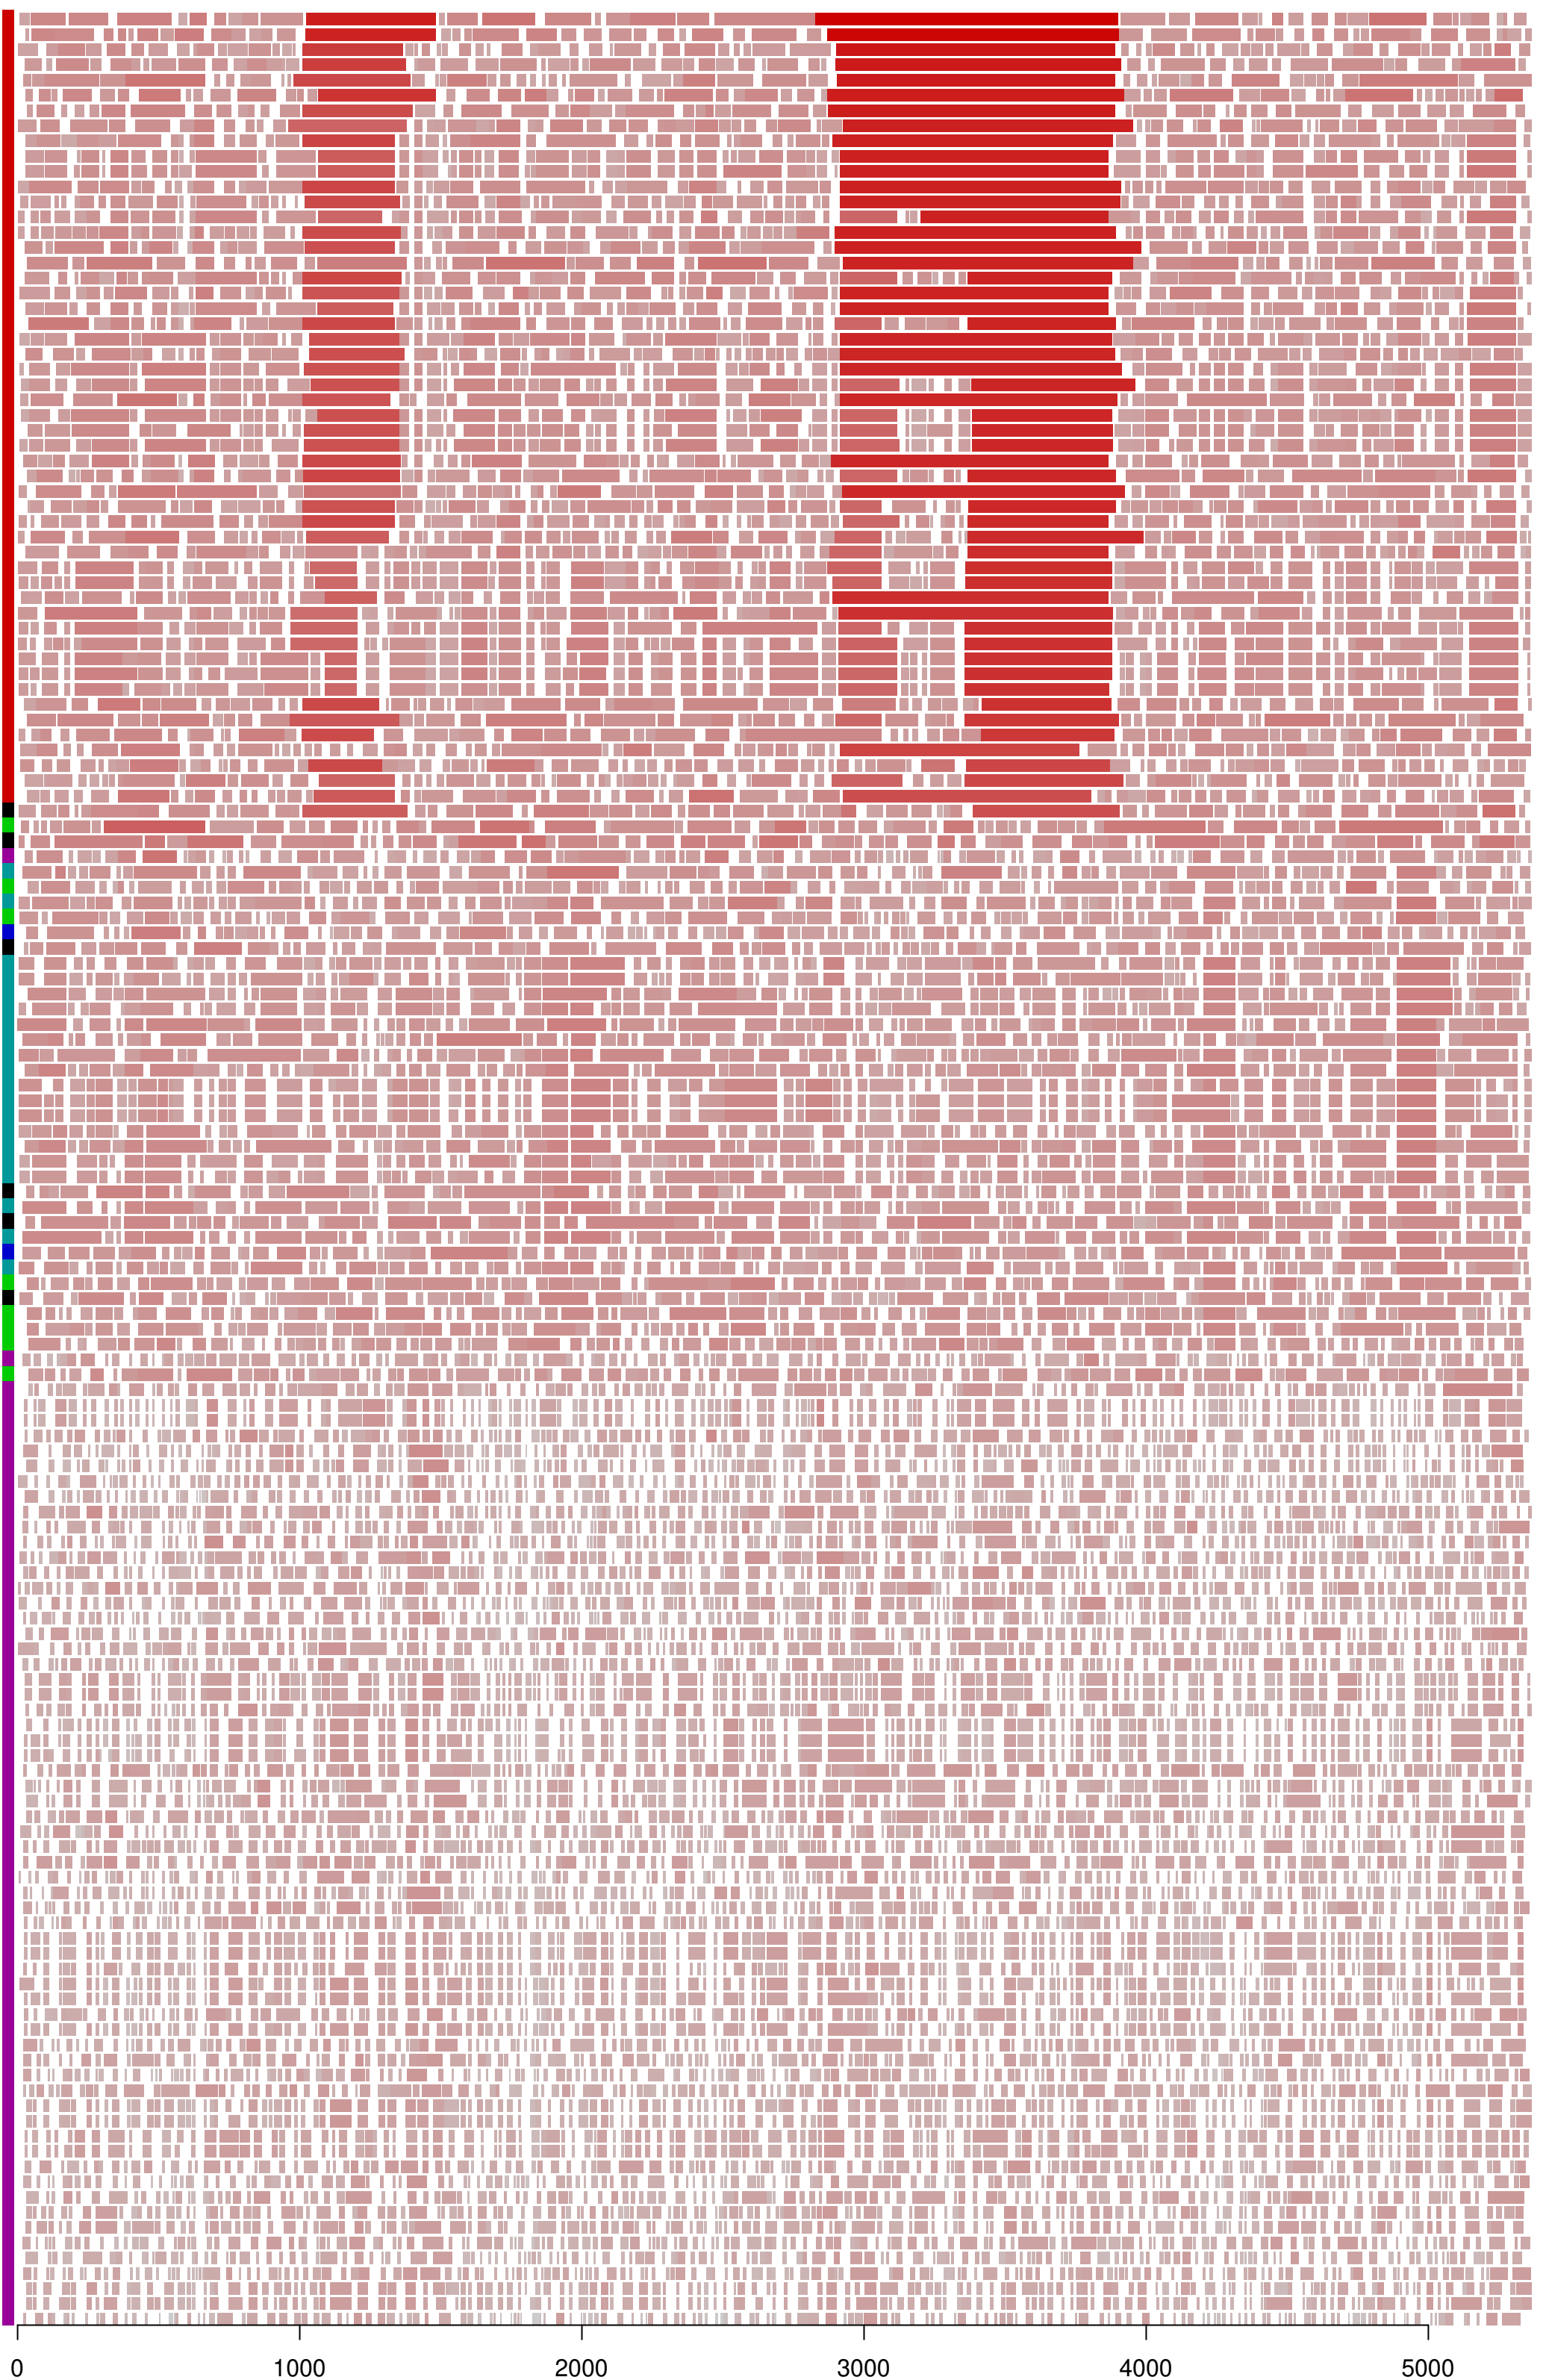

Teleostei  
Sauria  
Aves  
Mammalia  
Eutheria  
Others

1.9e+03  
6.5e+02  
2.2e+02  
7.8e+01  
2.8e+01

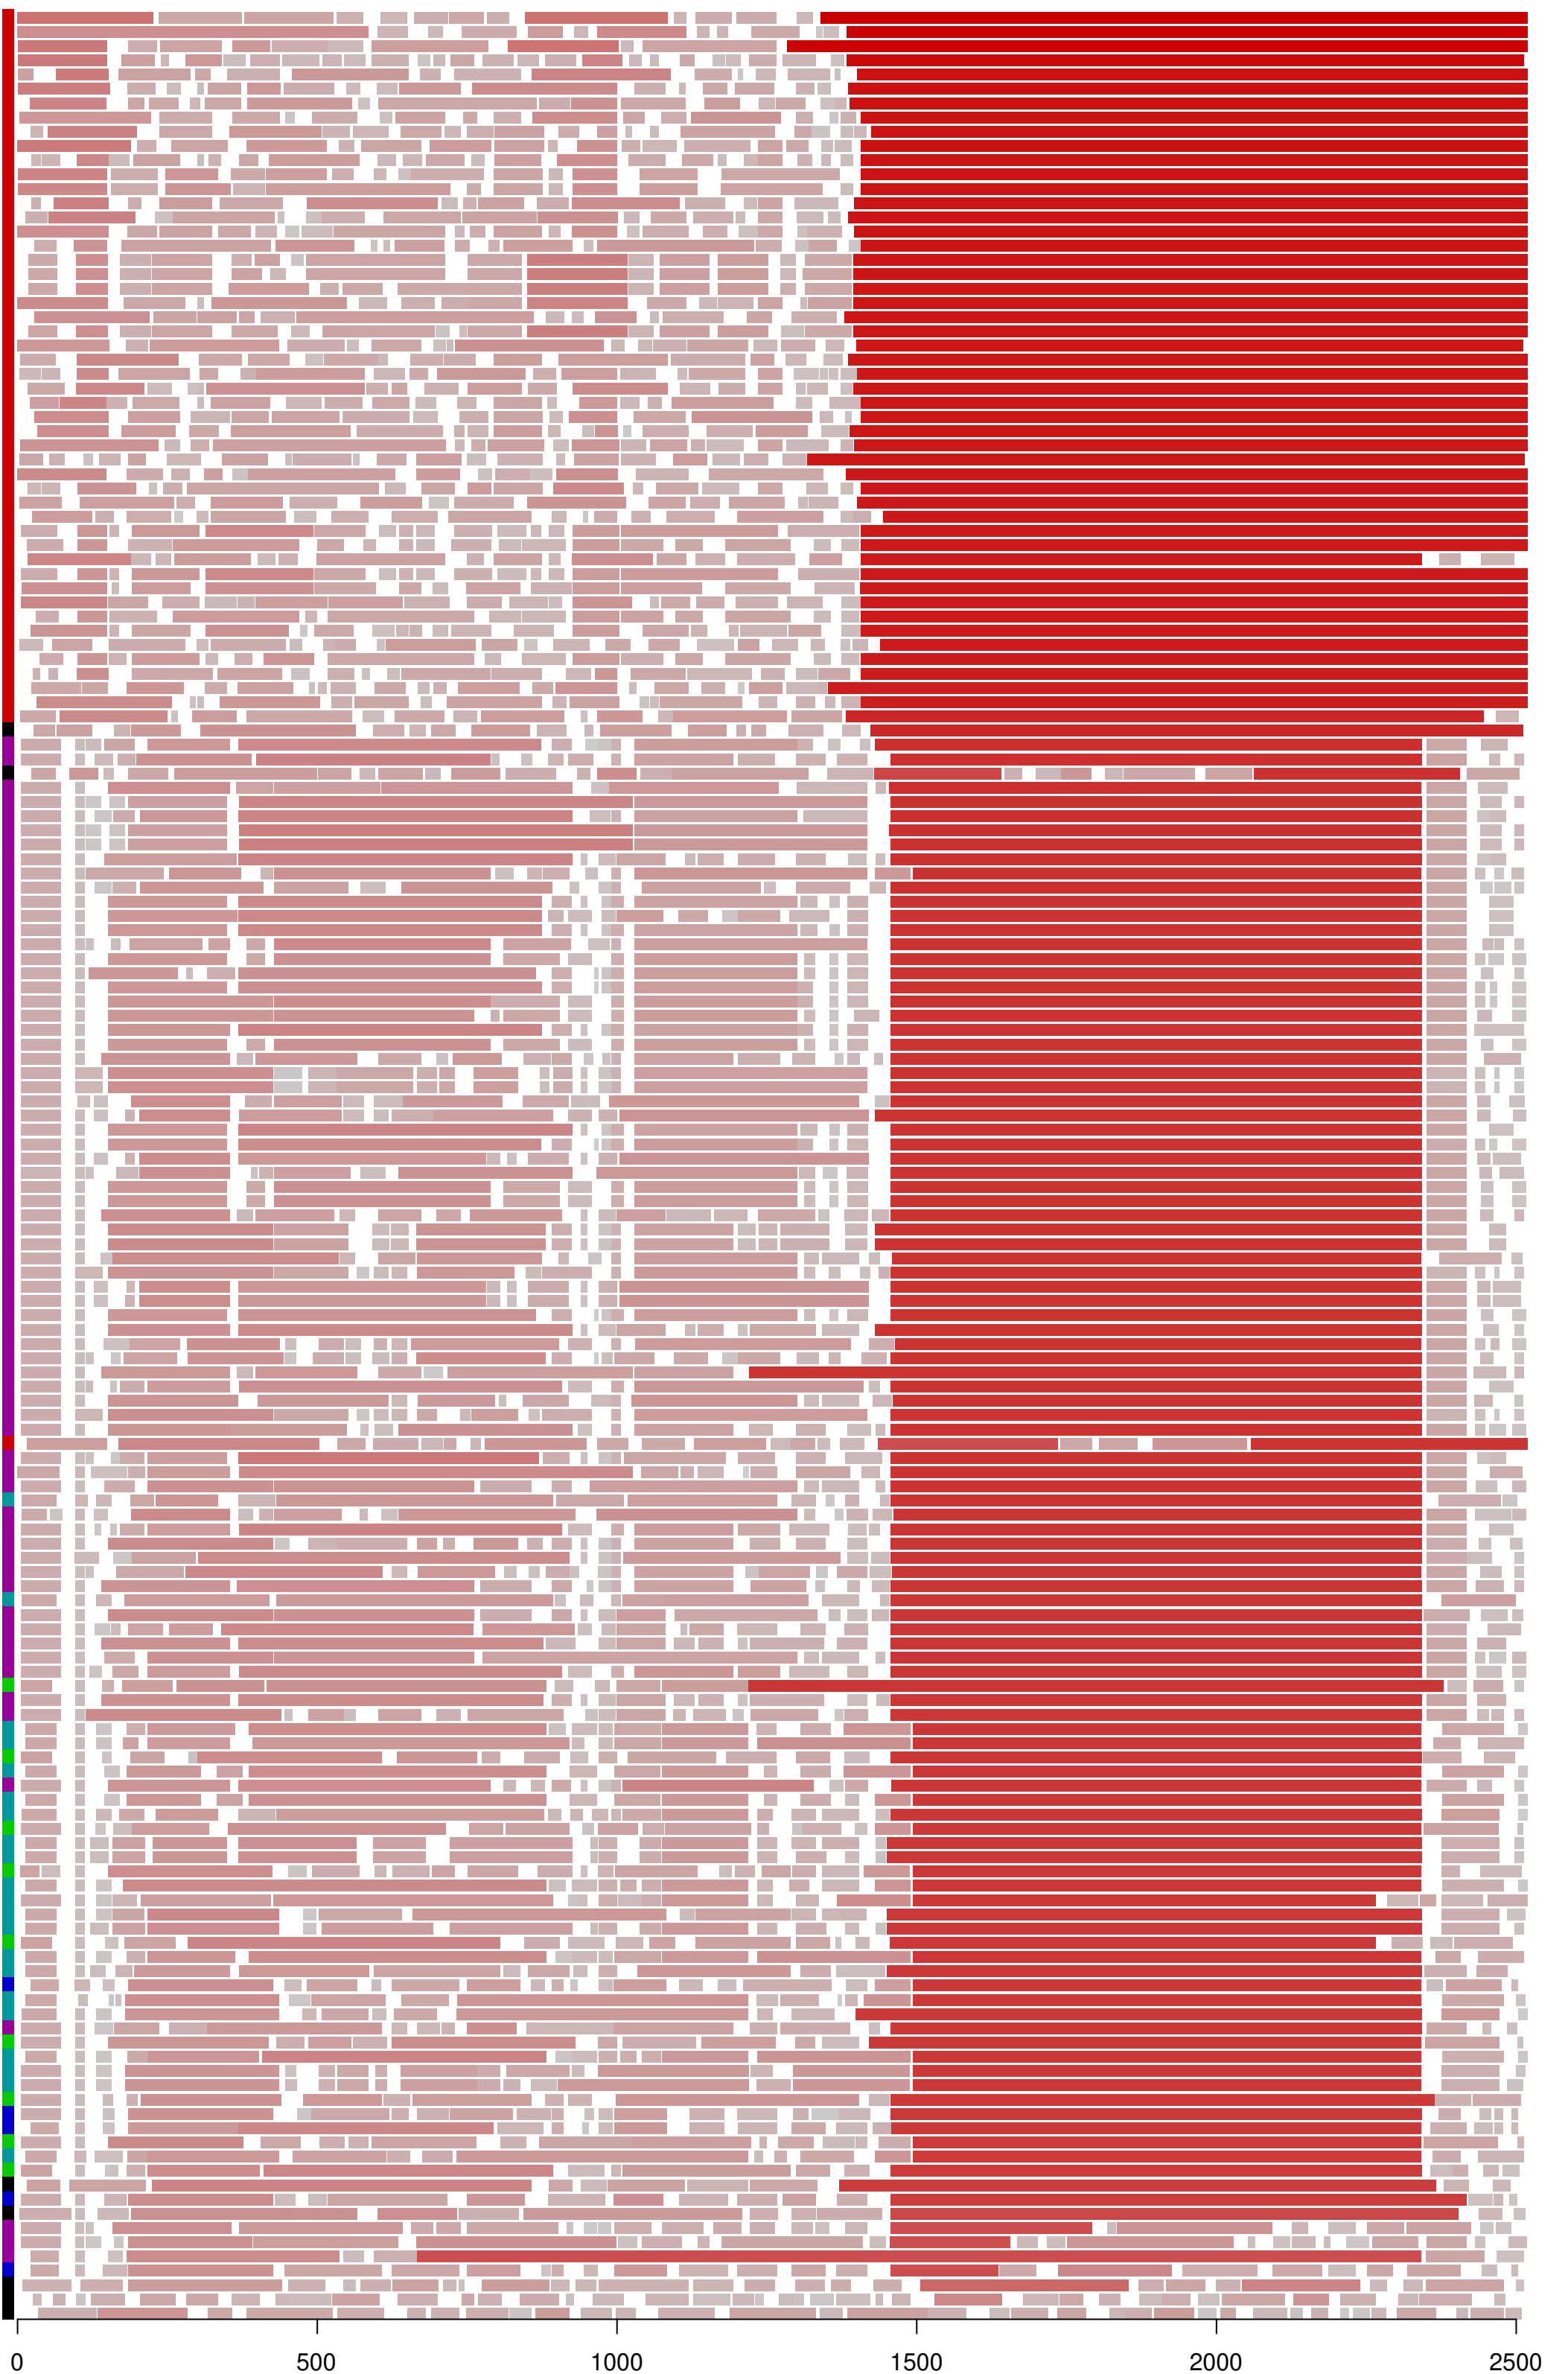

Teleostei  
Sauria  
Aves  
Mammalia  
Eutheria  
Others

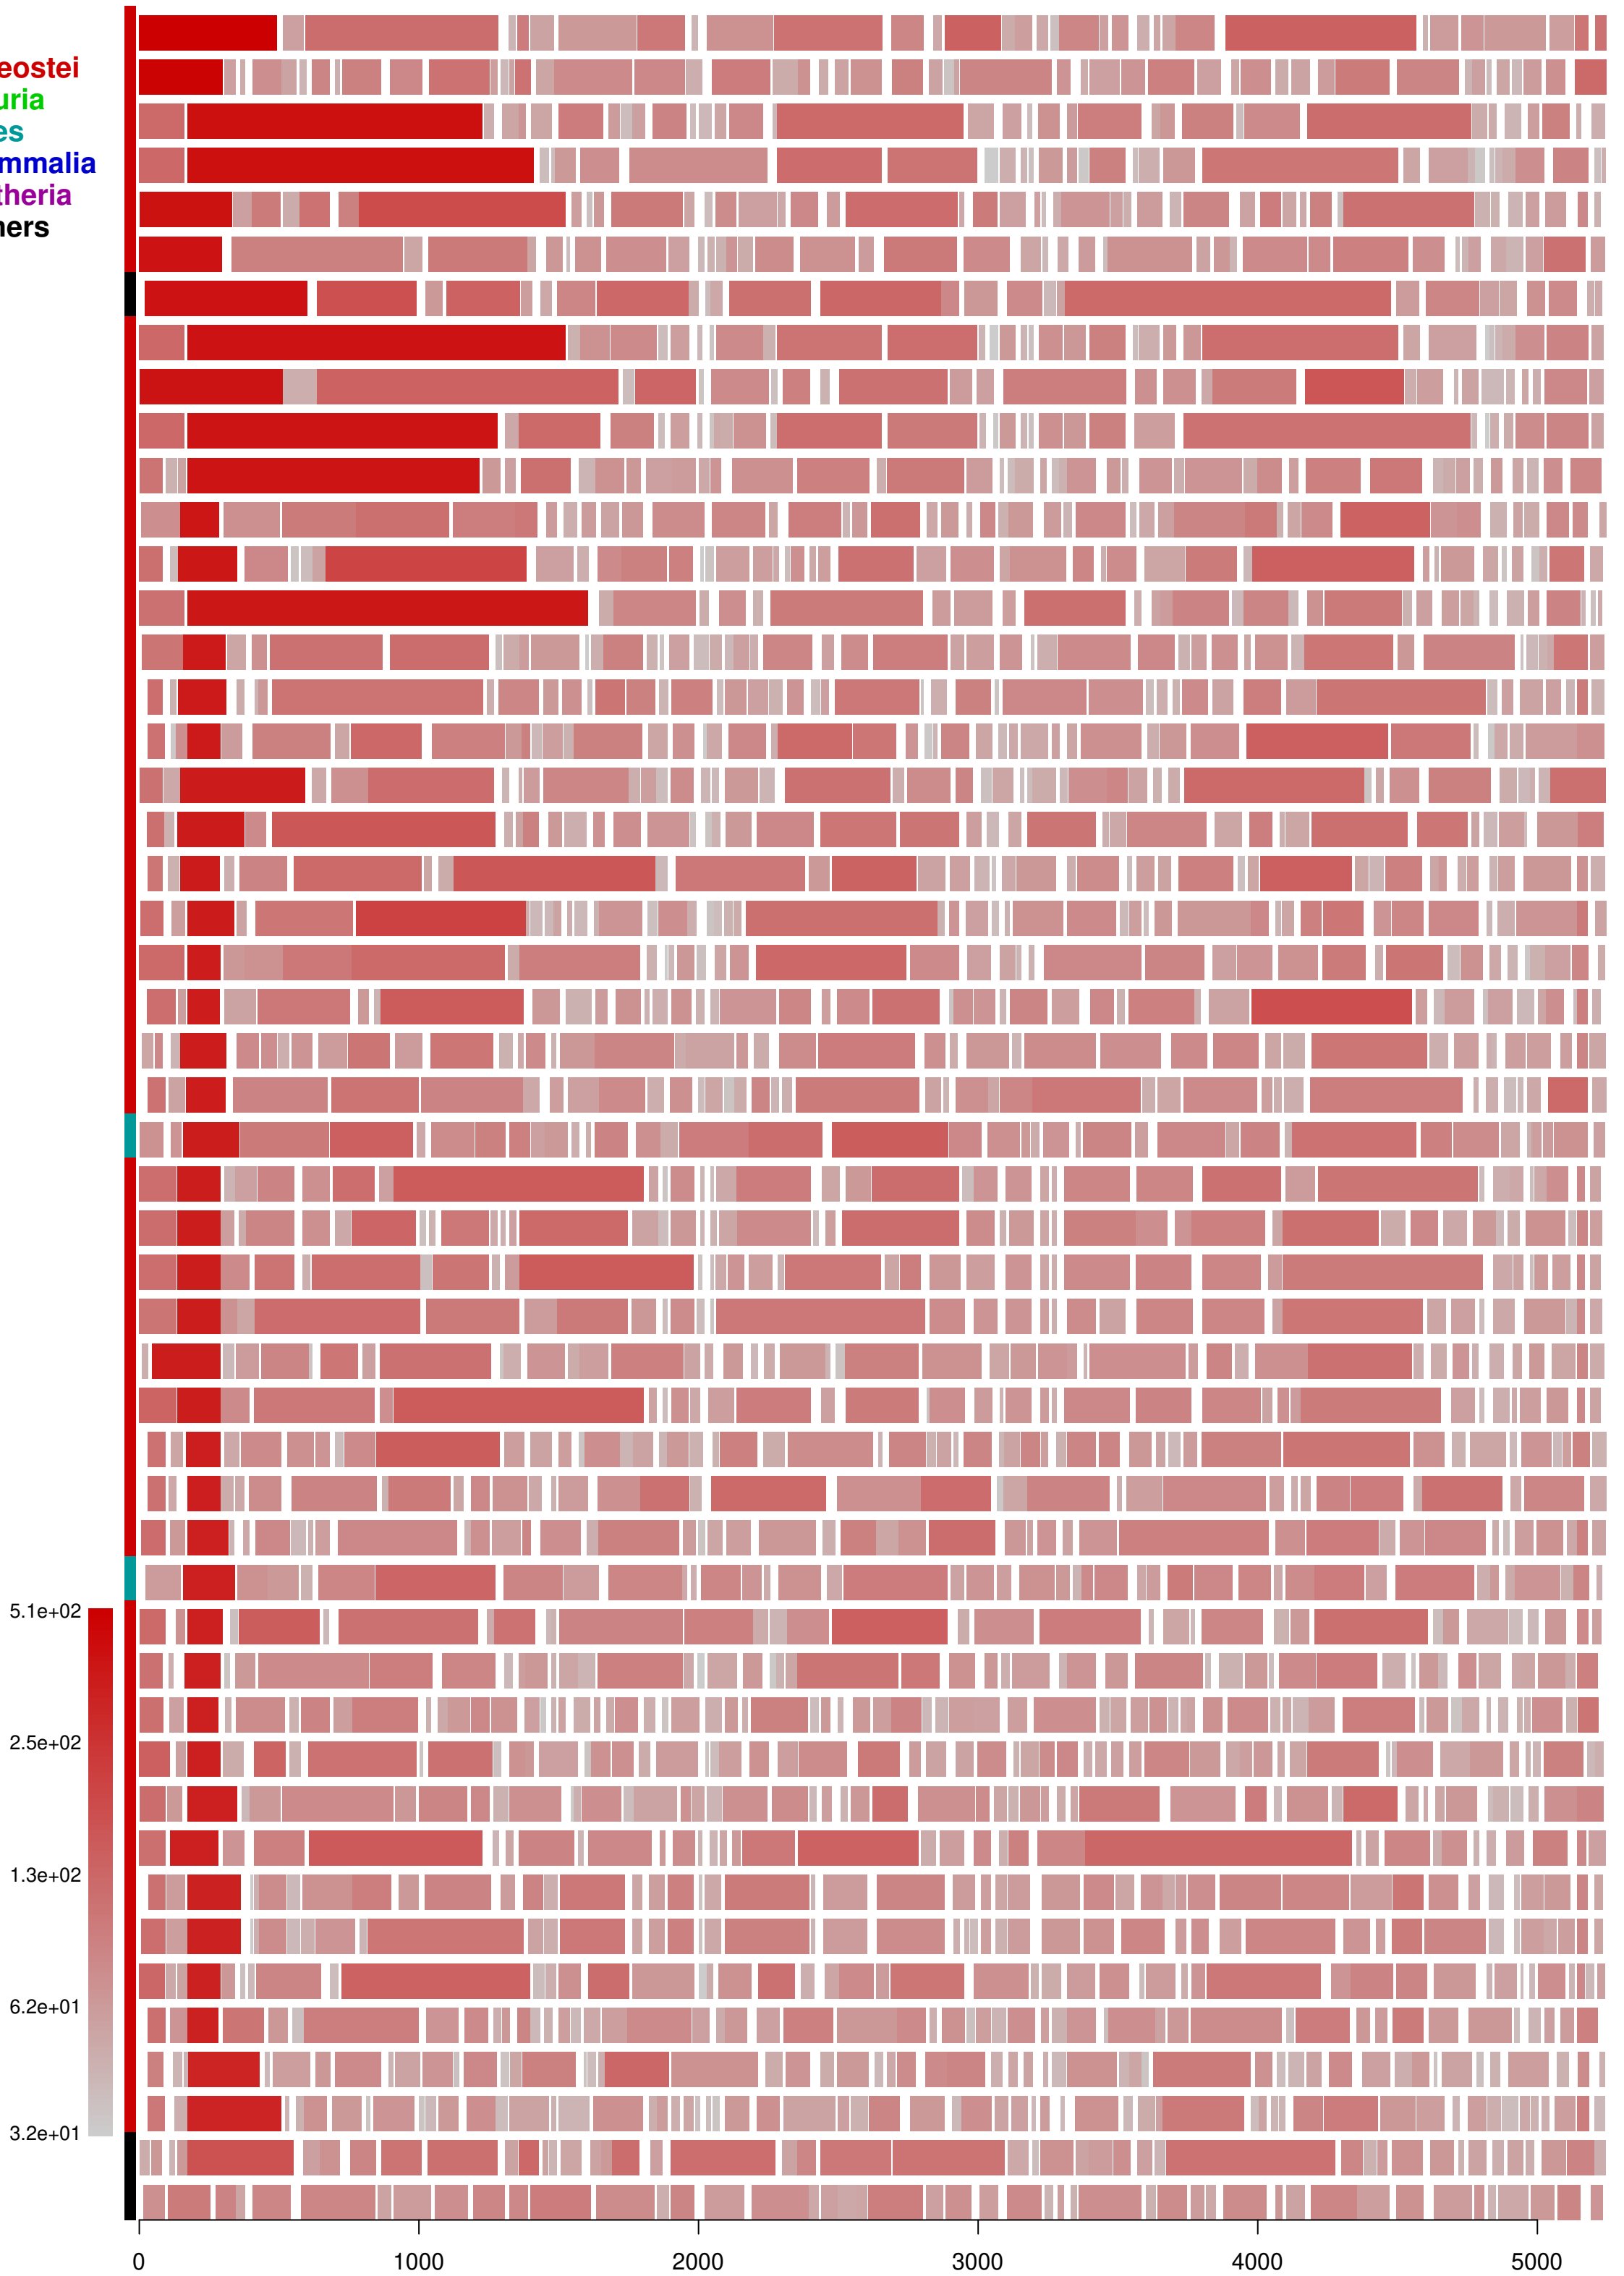

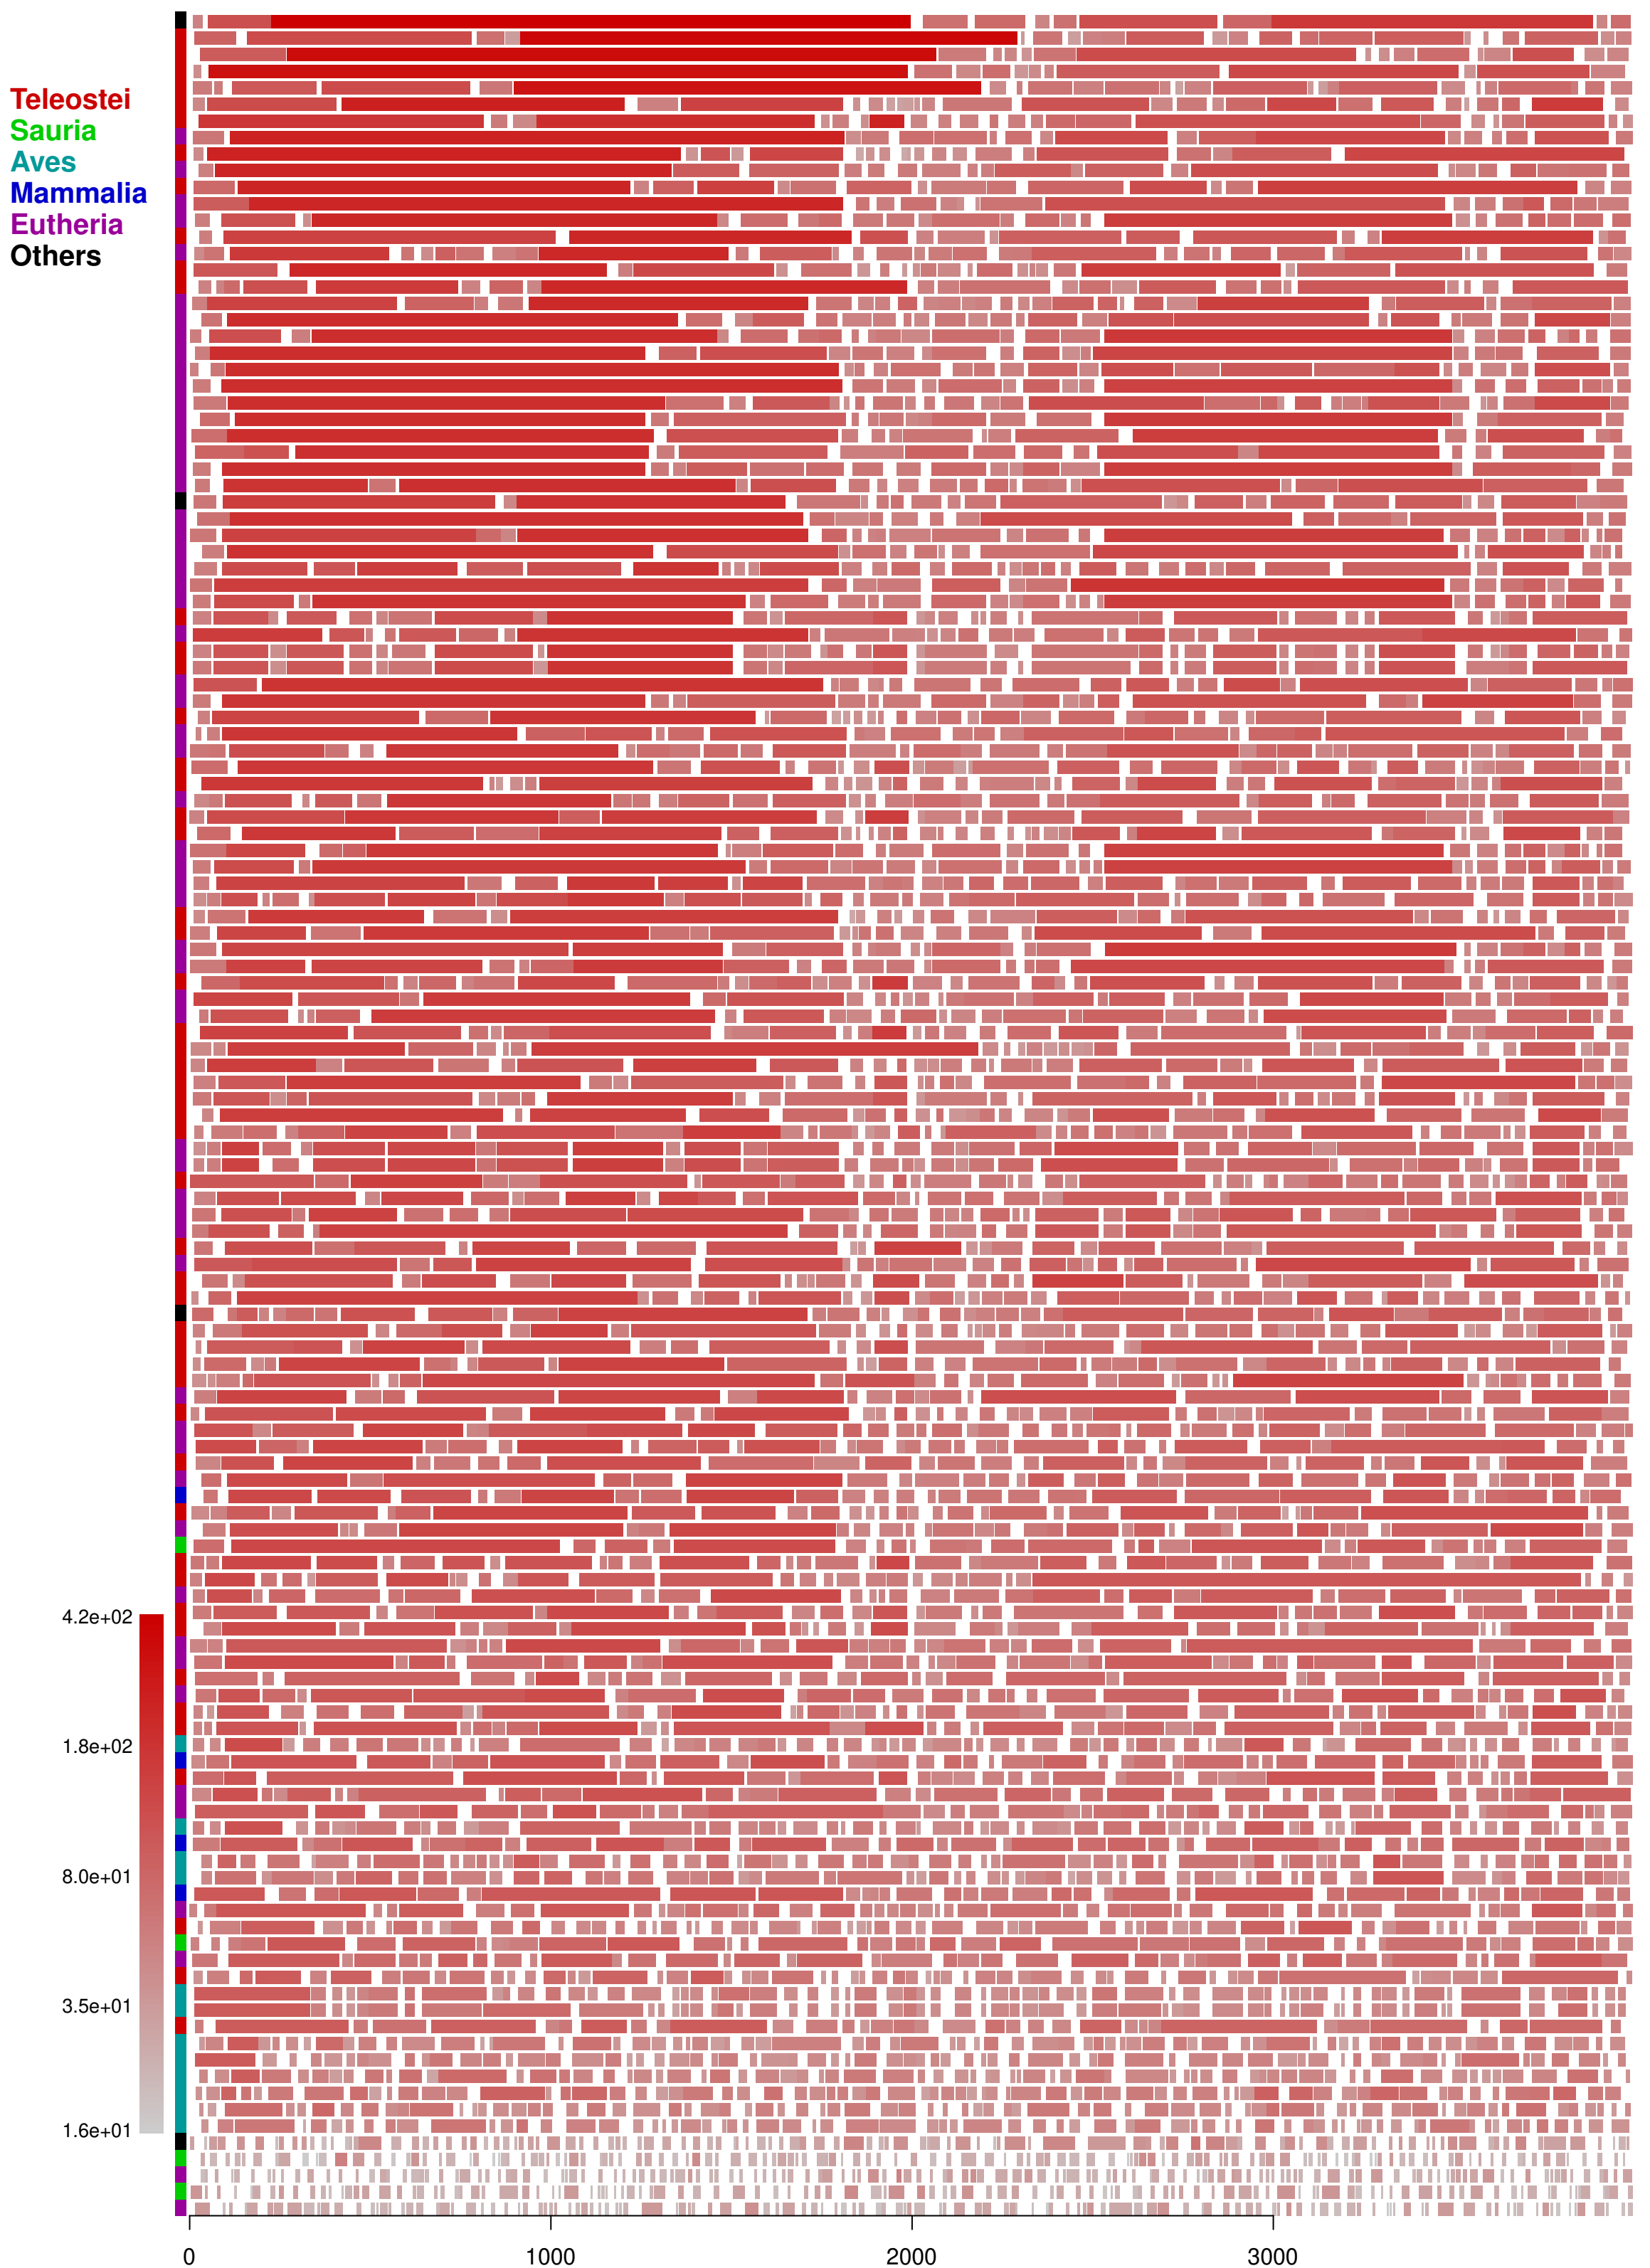

3 alignments above max size (1.0e+08)

Teleostei  
Sauria  
Aves  
Mammalia  
Eutheria  
Others

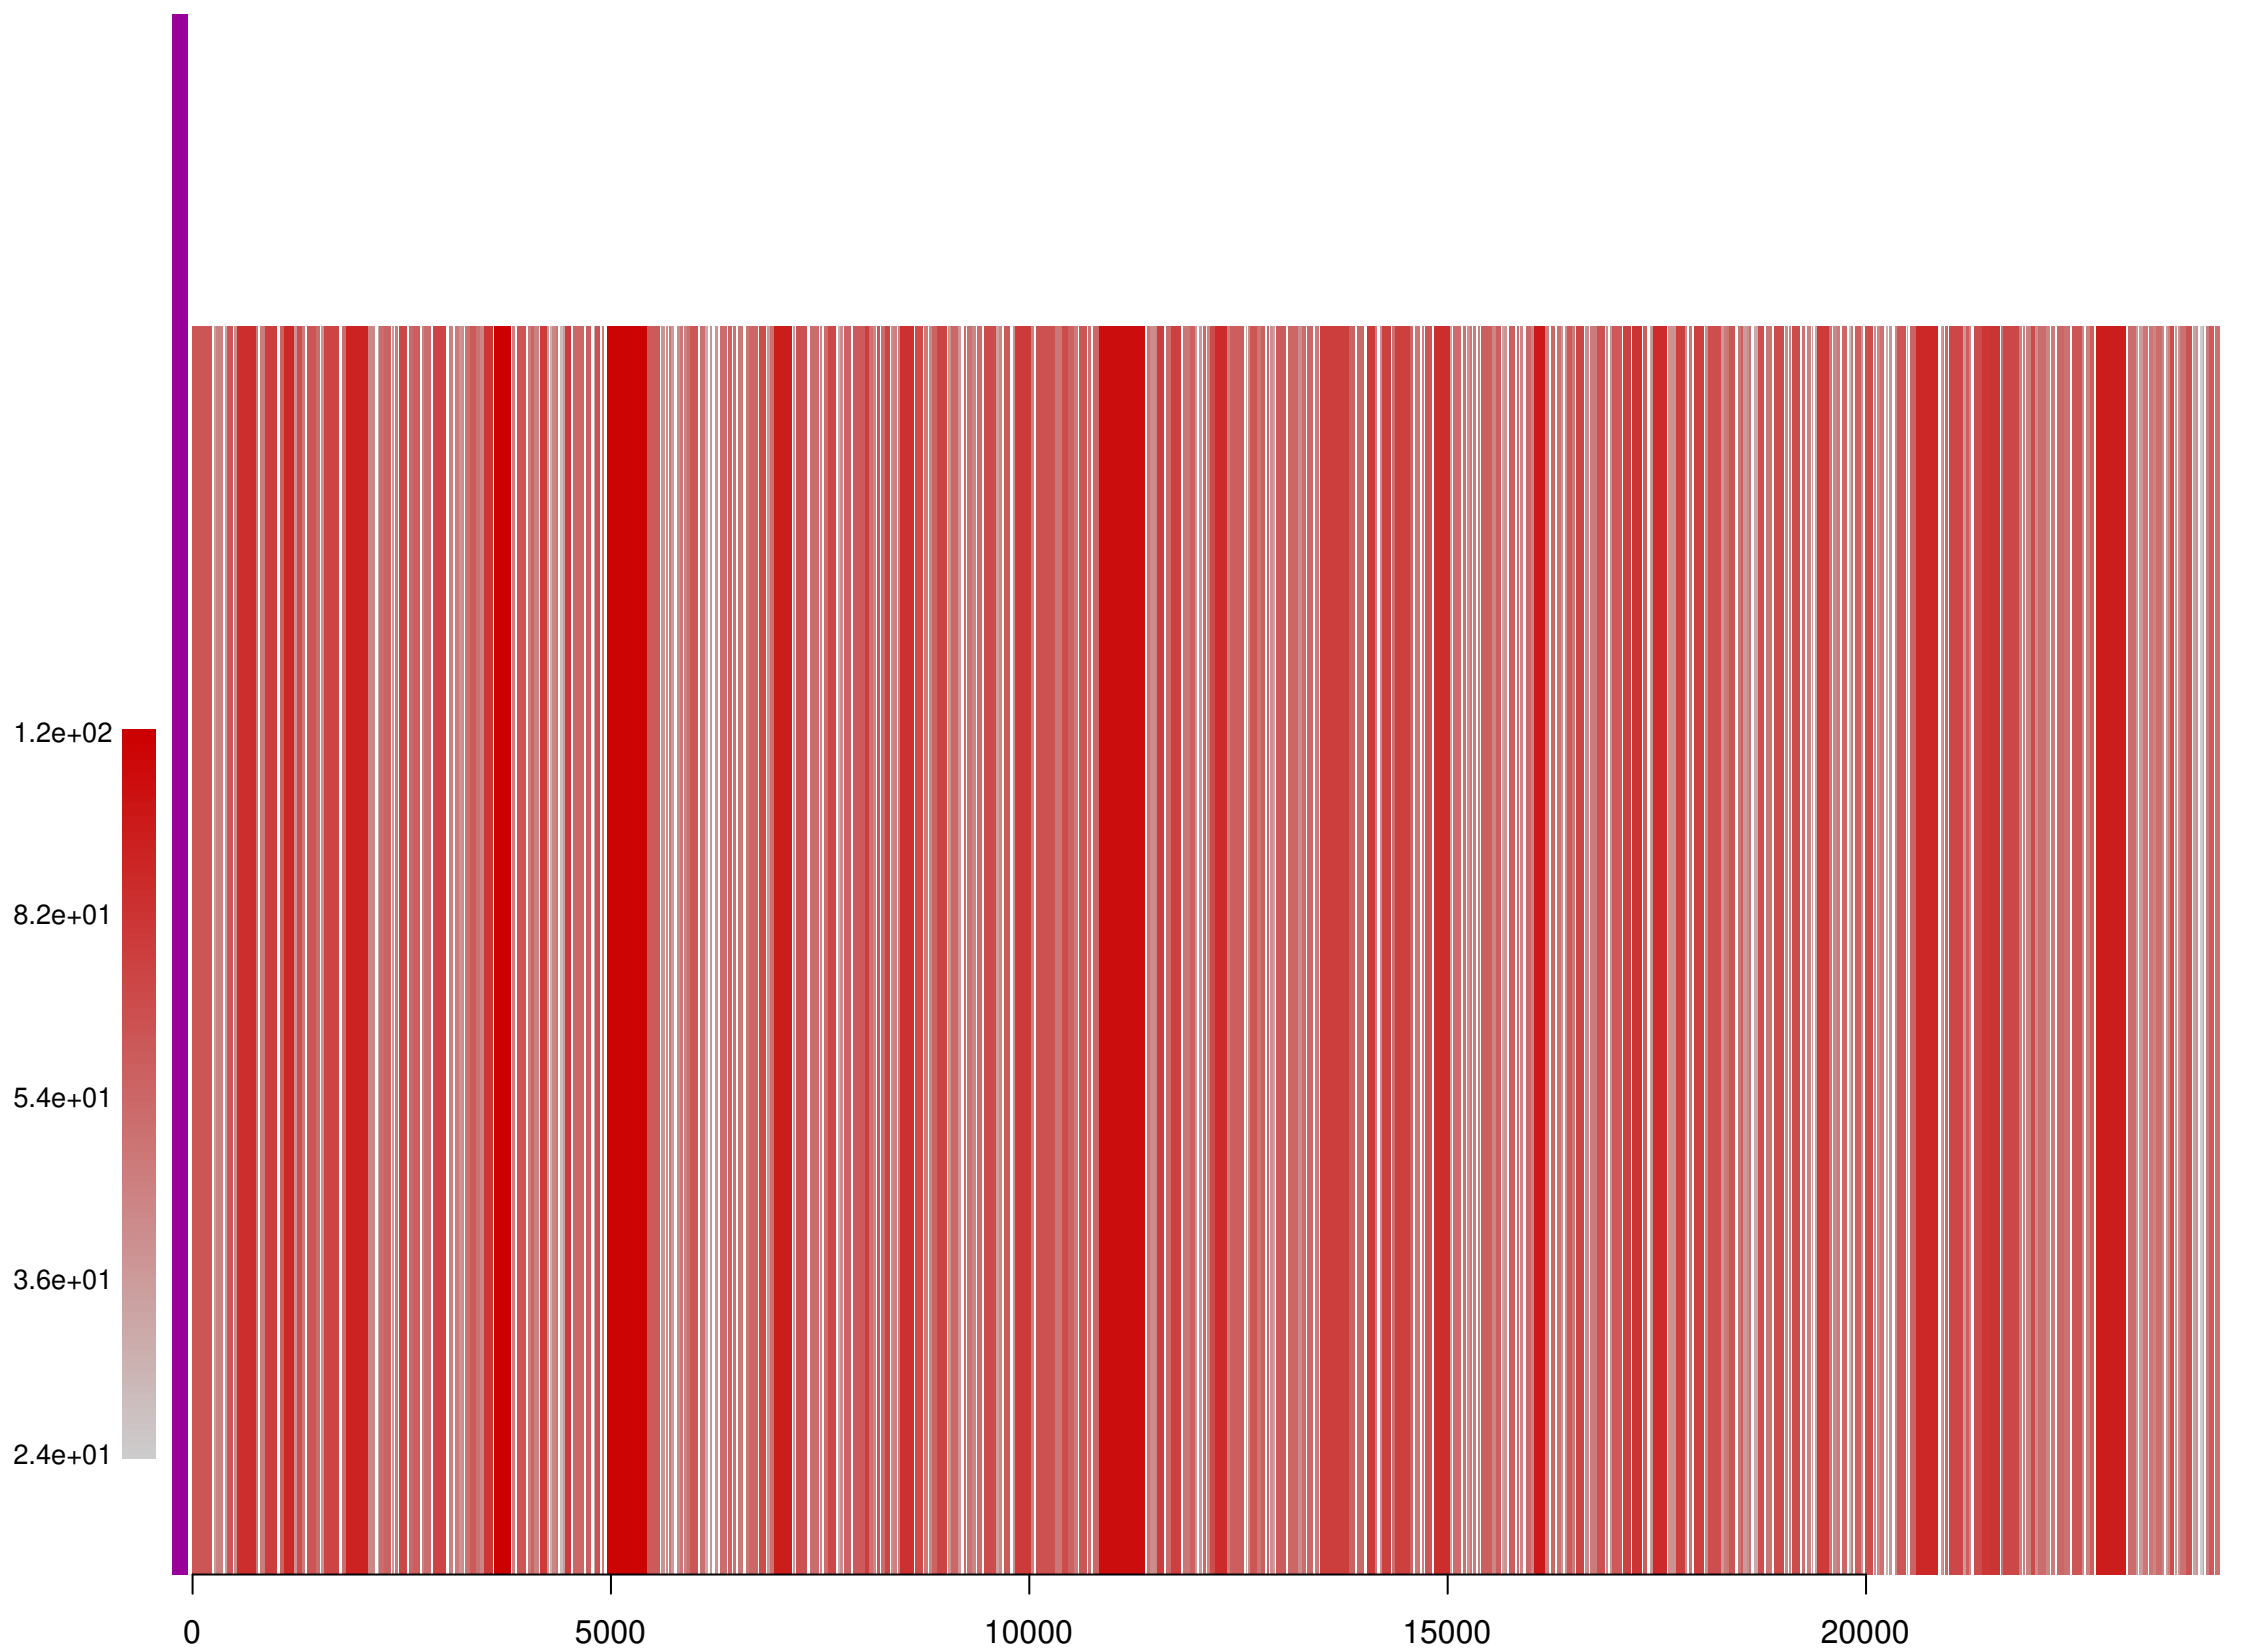

155 alignments above max size (1.0e+08)

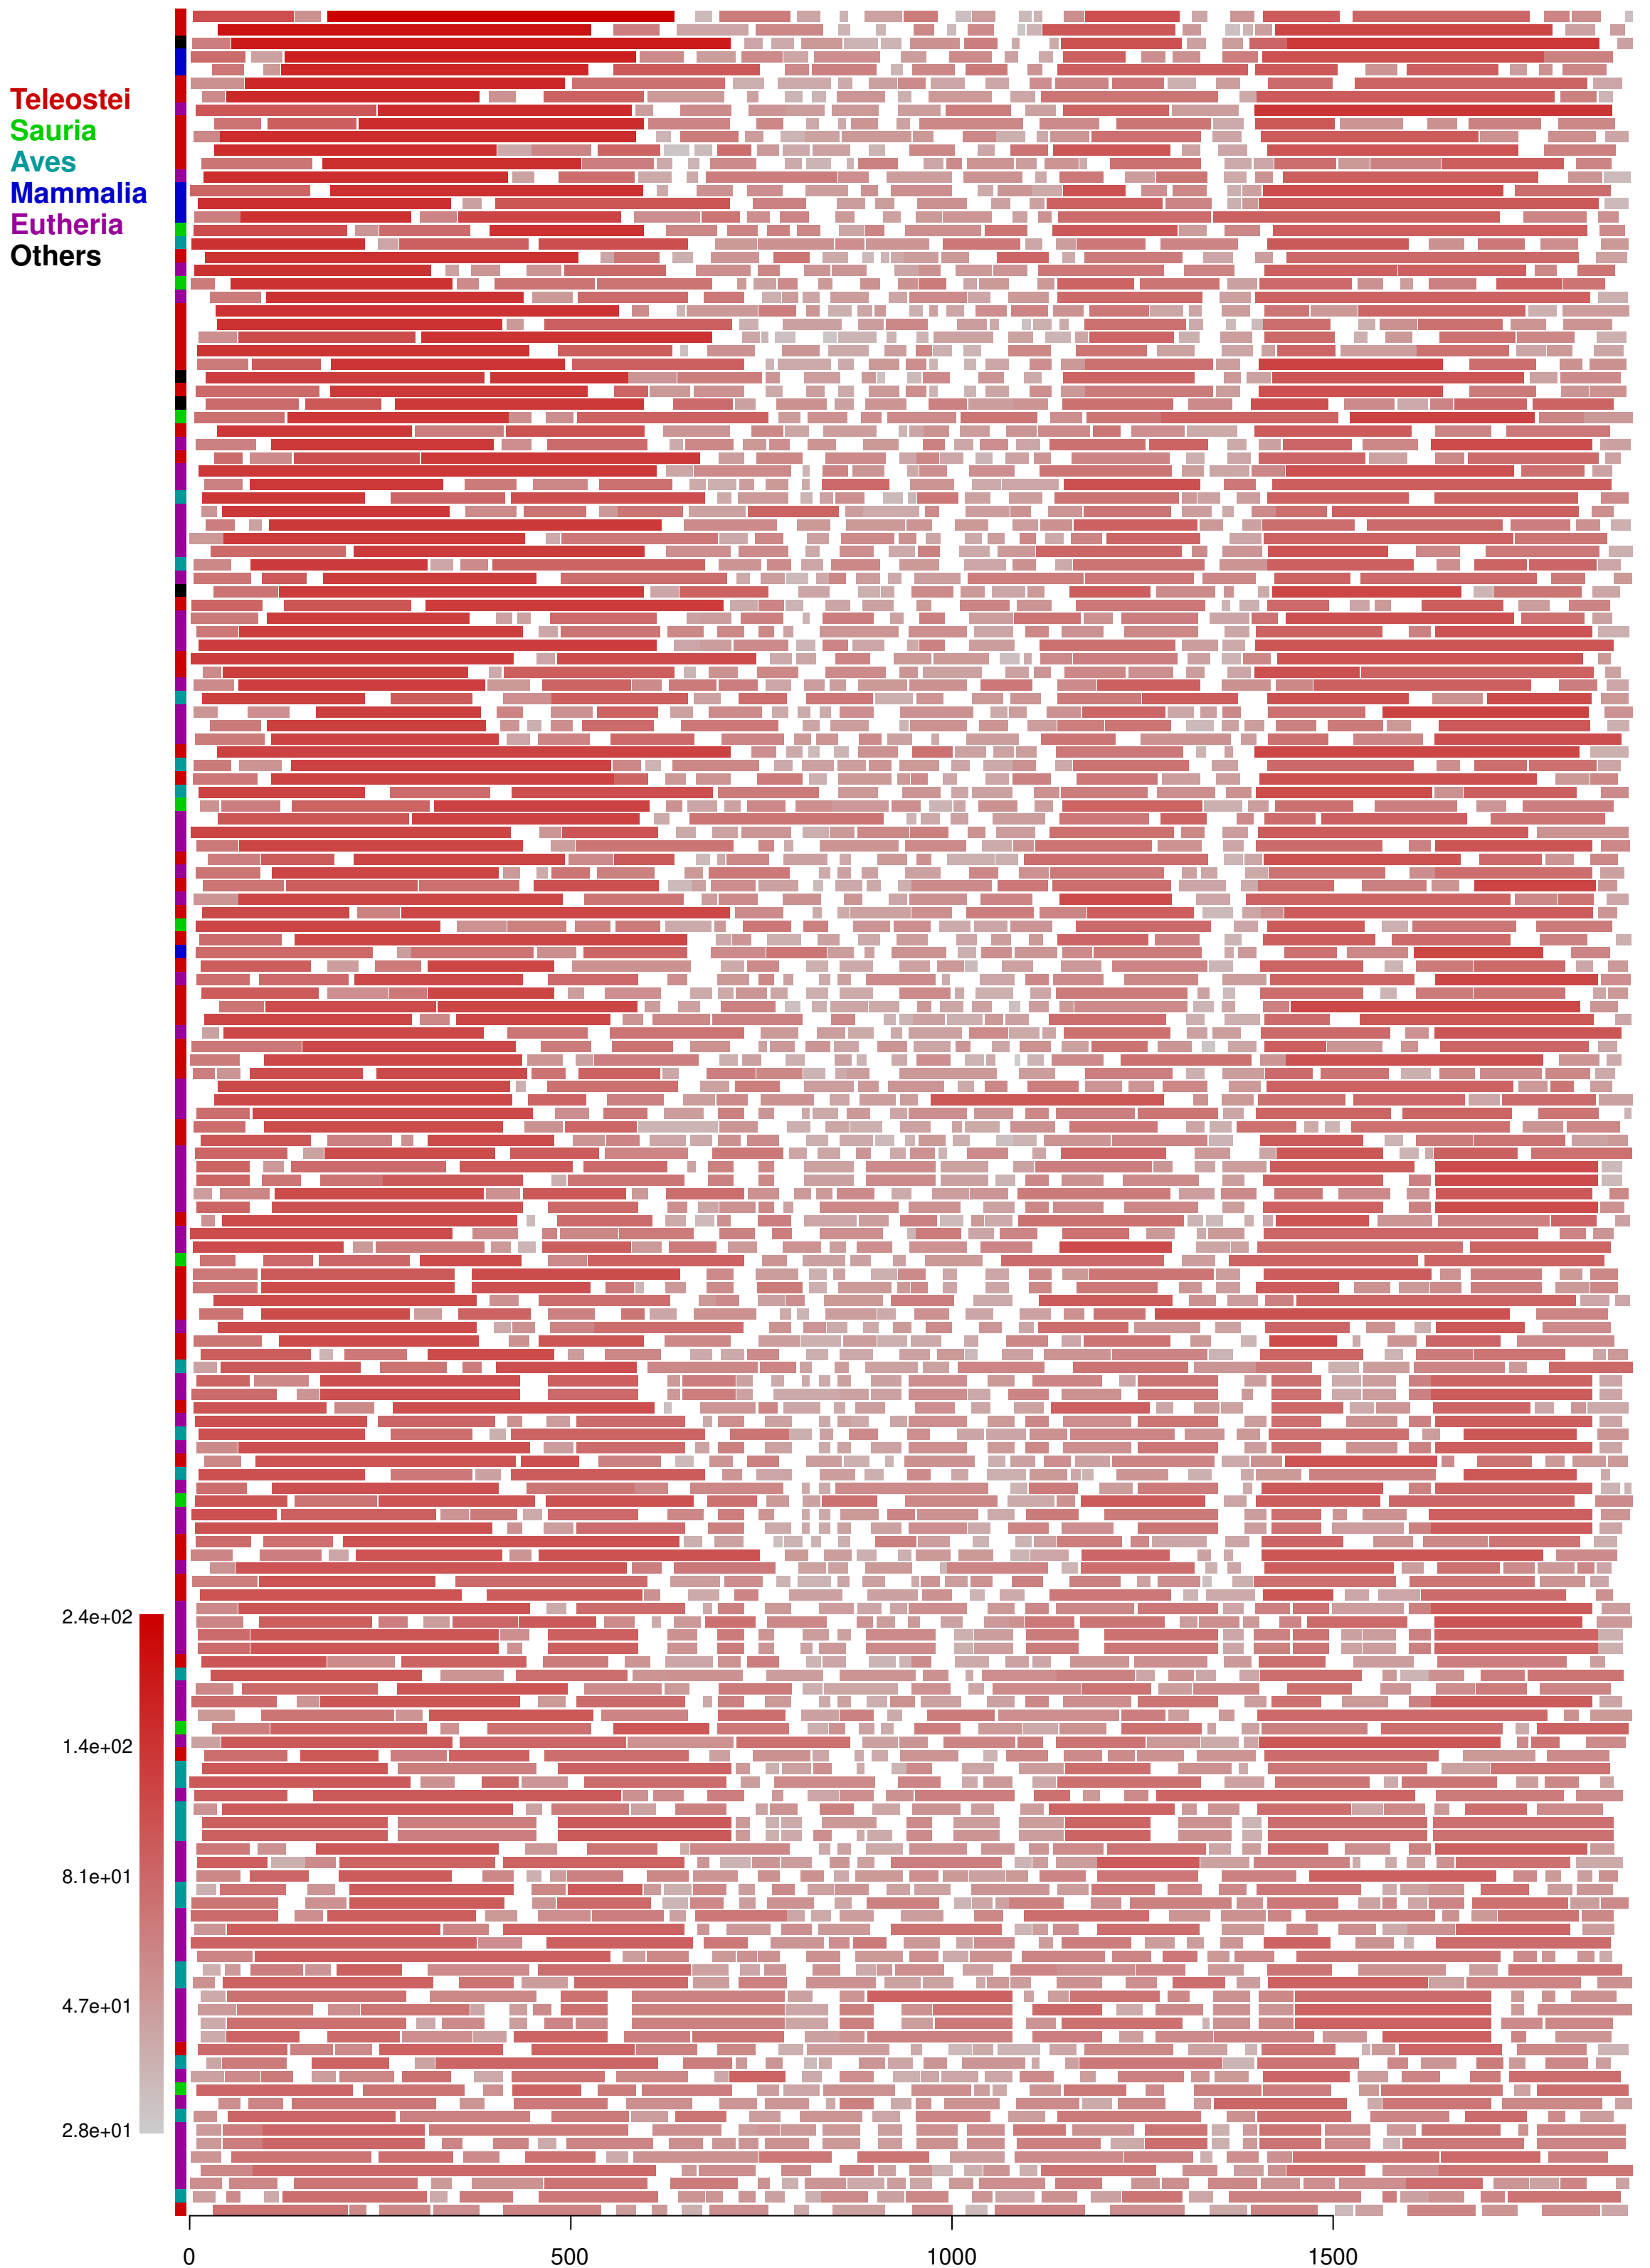

0 alignments above max size (1.0e+08)

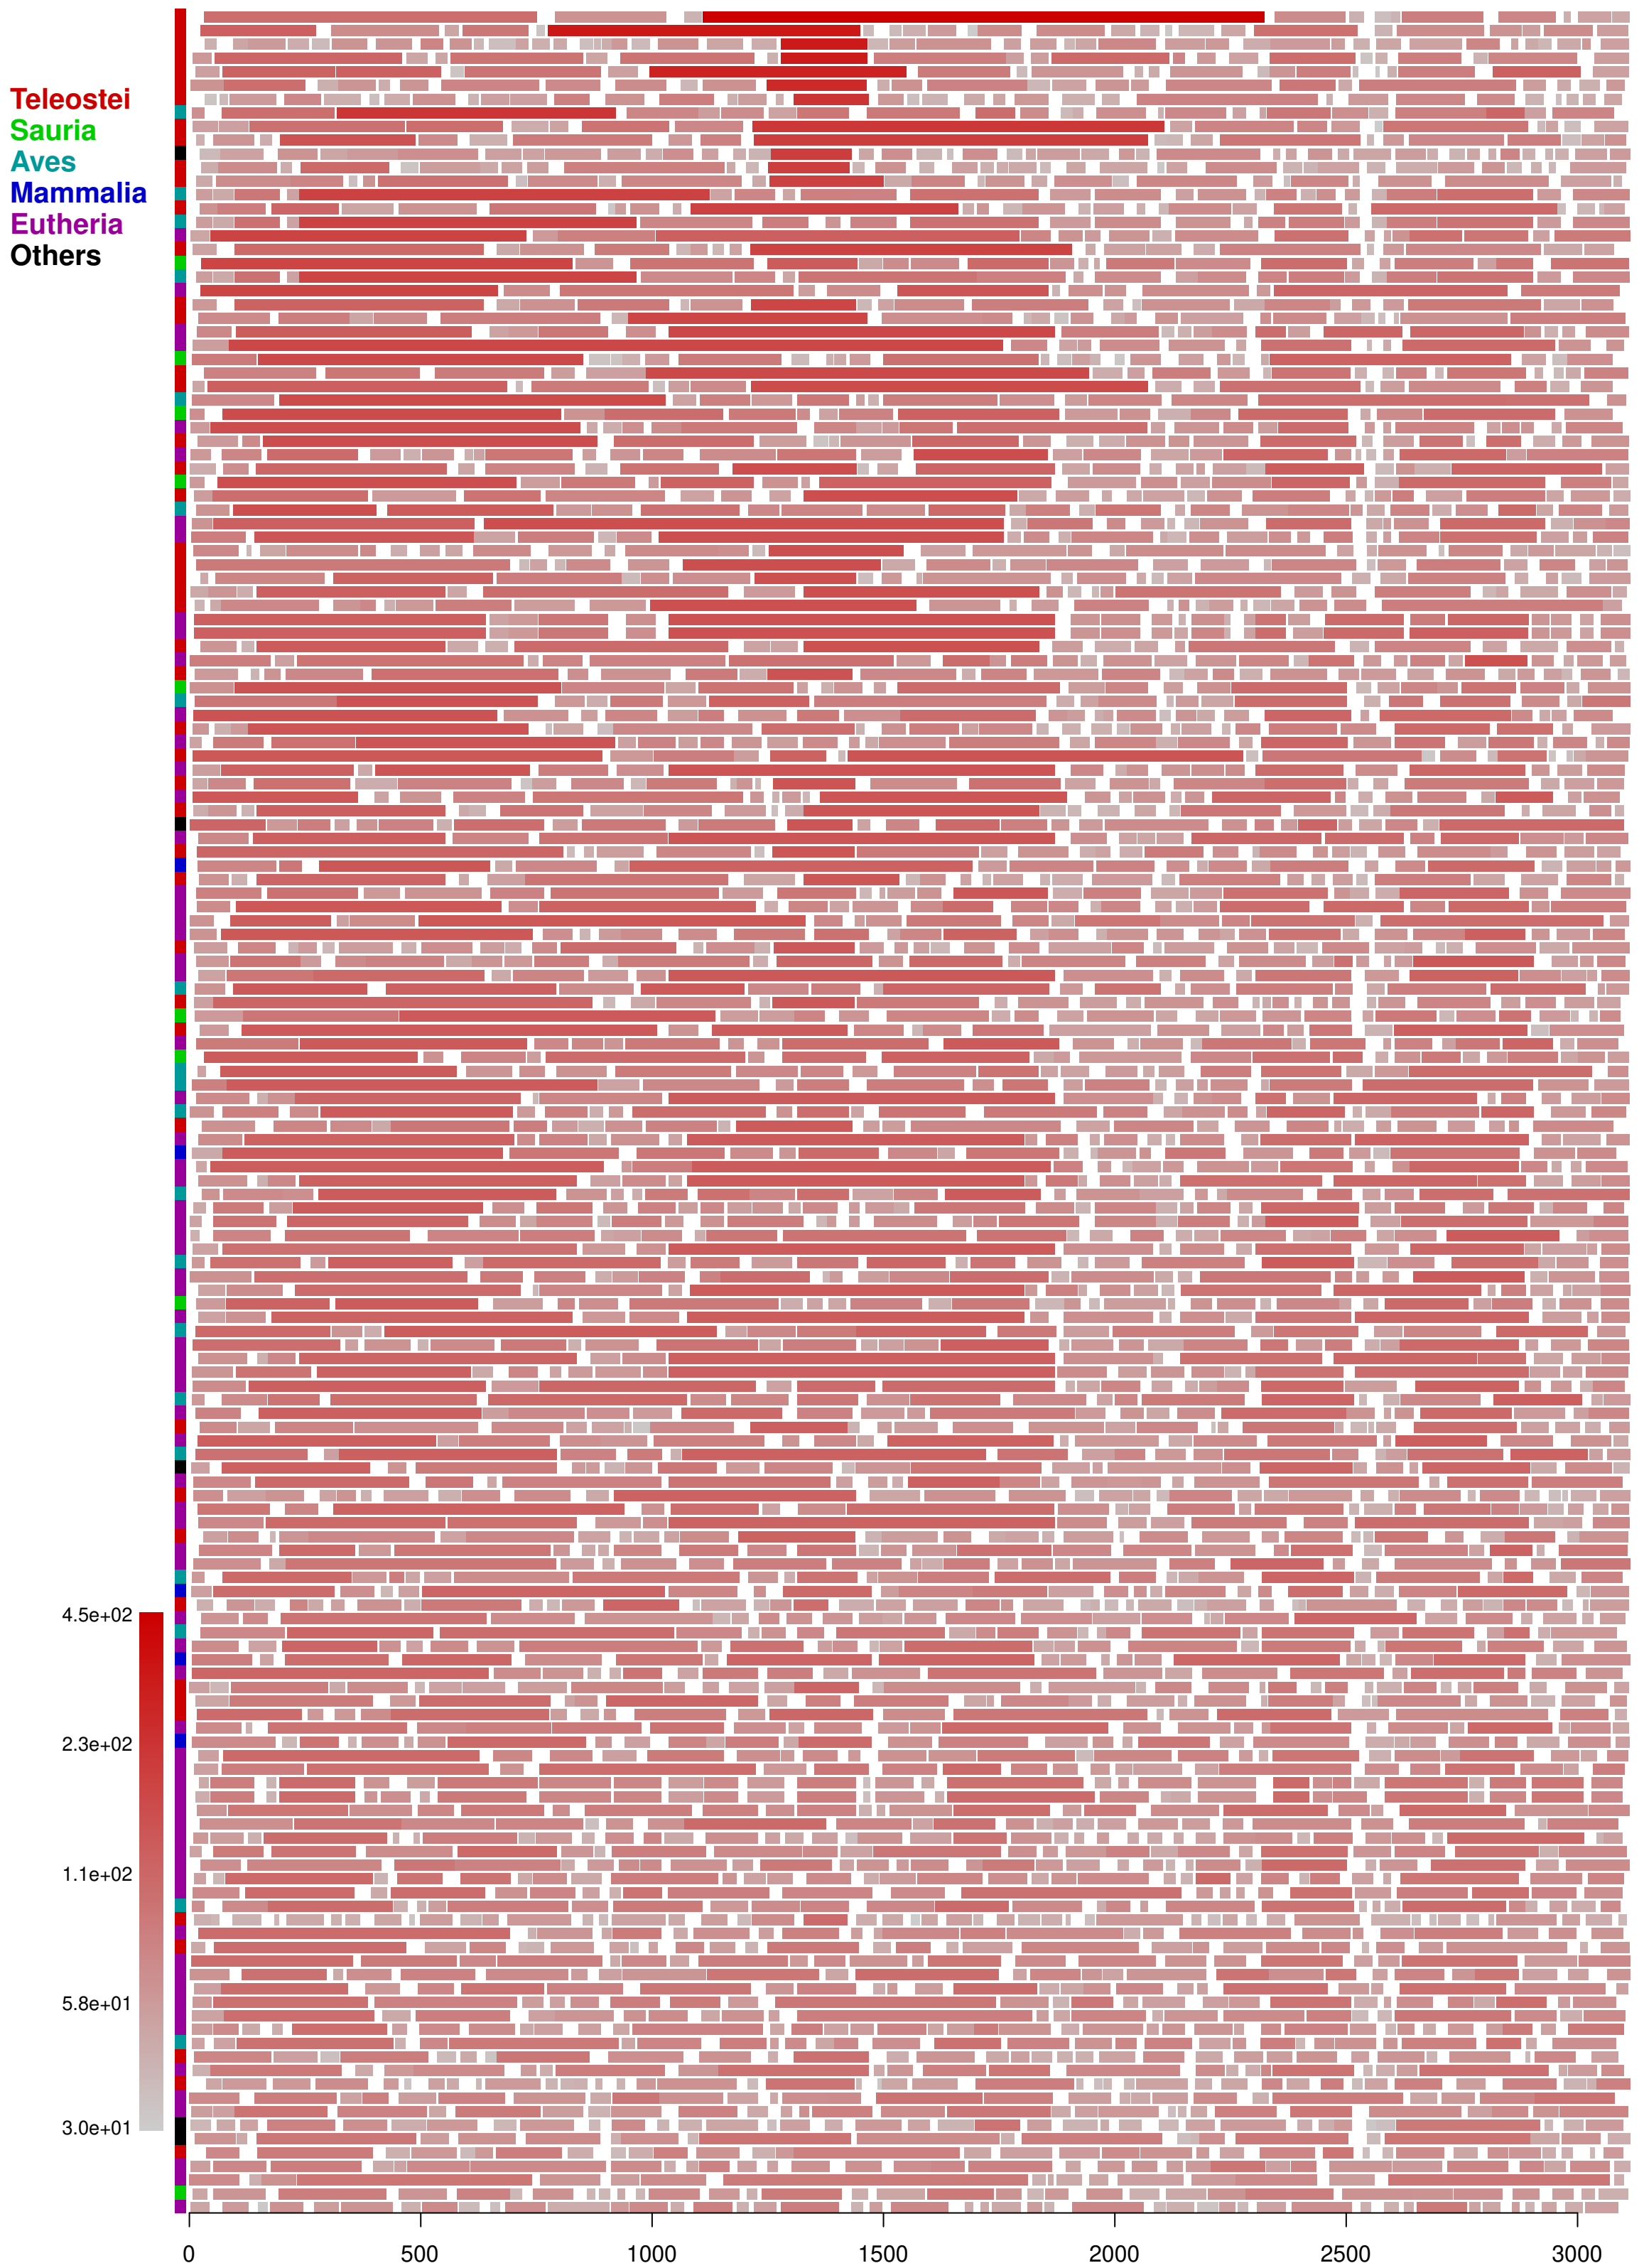

0 alignments above max size (1.0e+08)

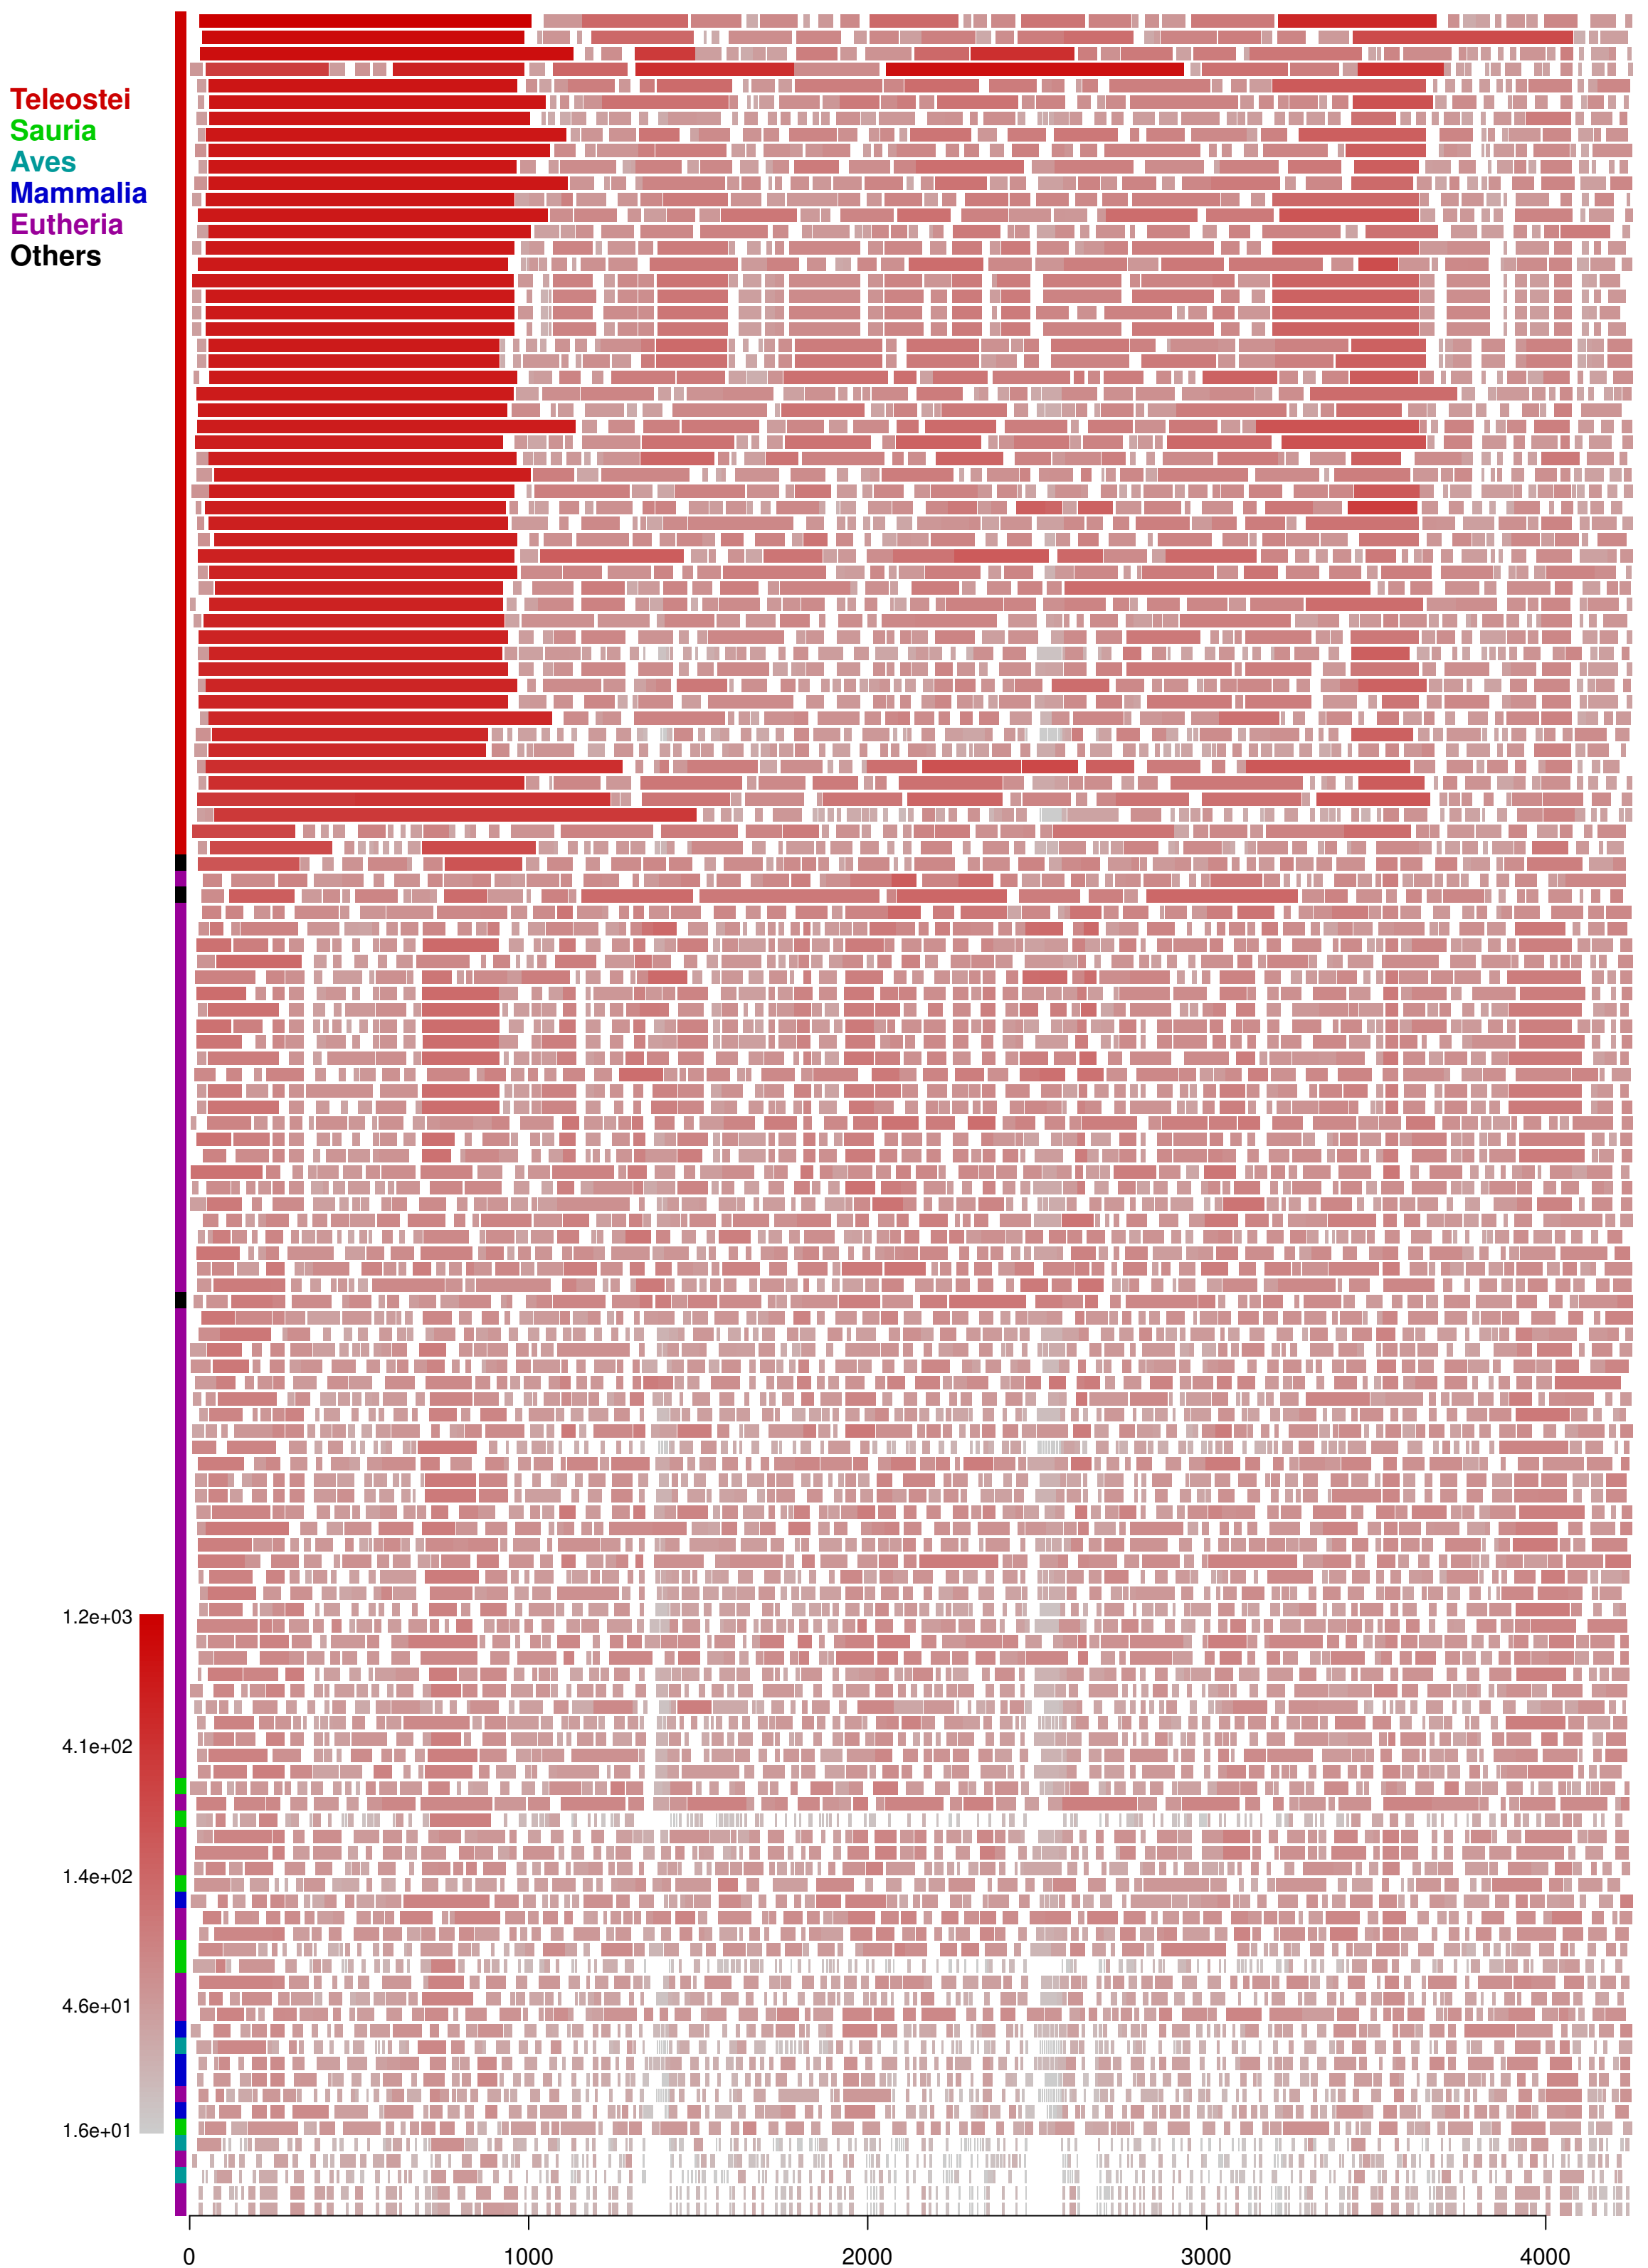

1 alignments above max size (1.0e+08)



Teleostei  
Sauria  
Aves  
Mammalia  
Eutheria  
Others

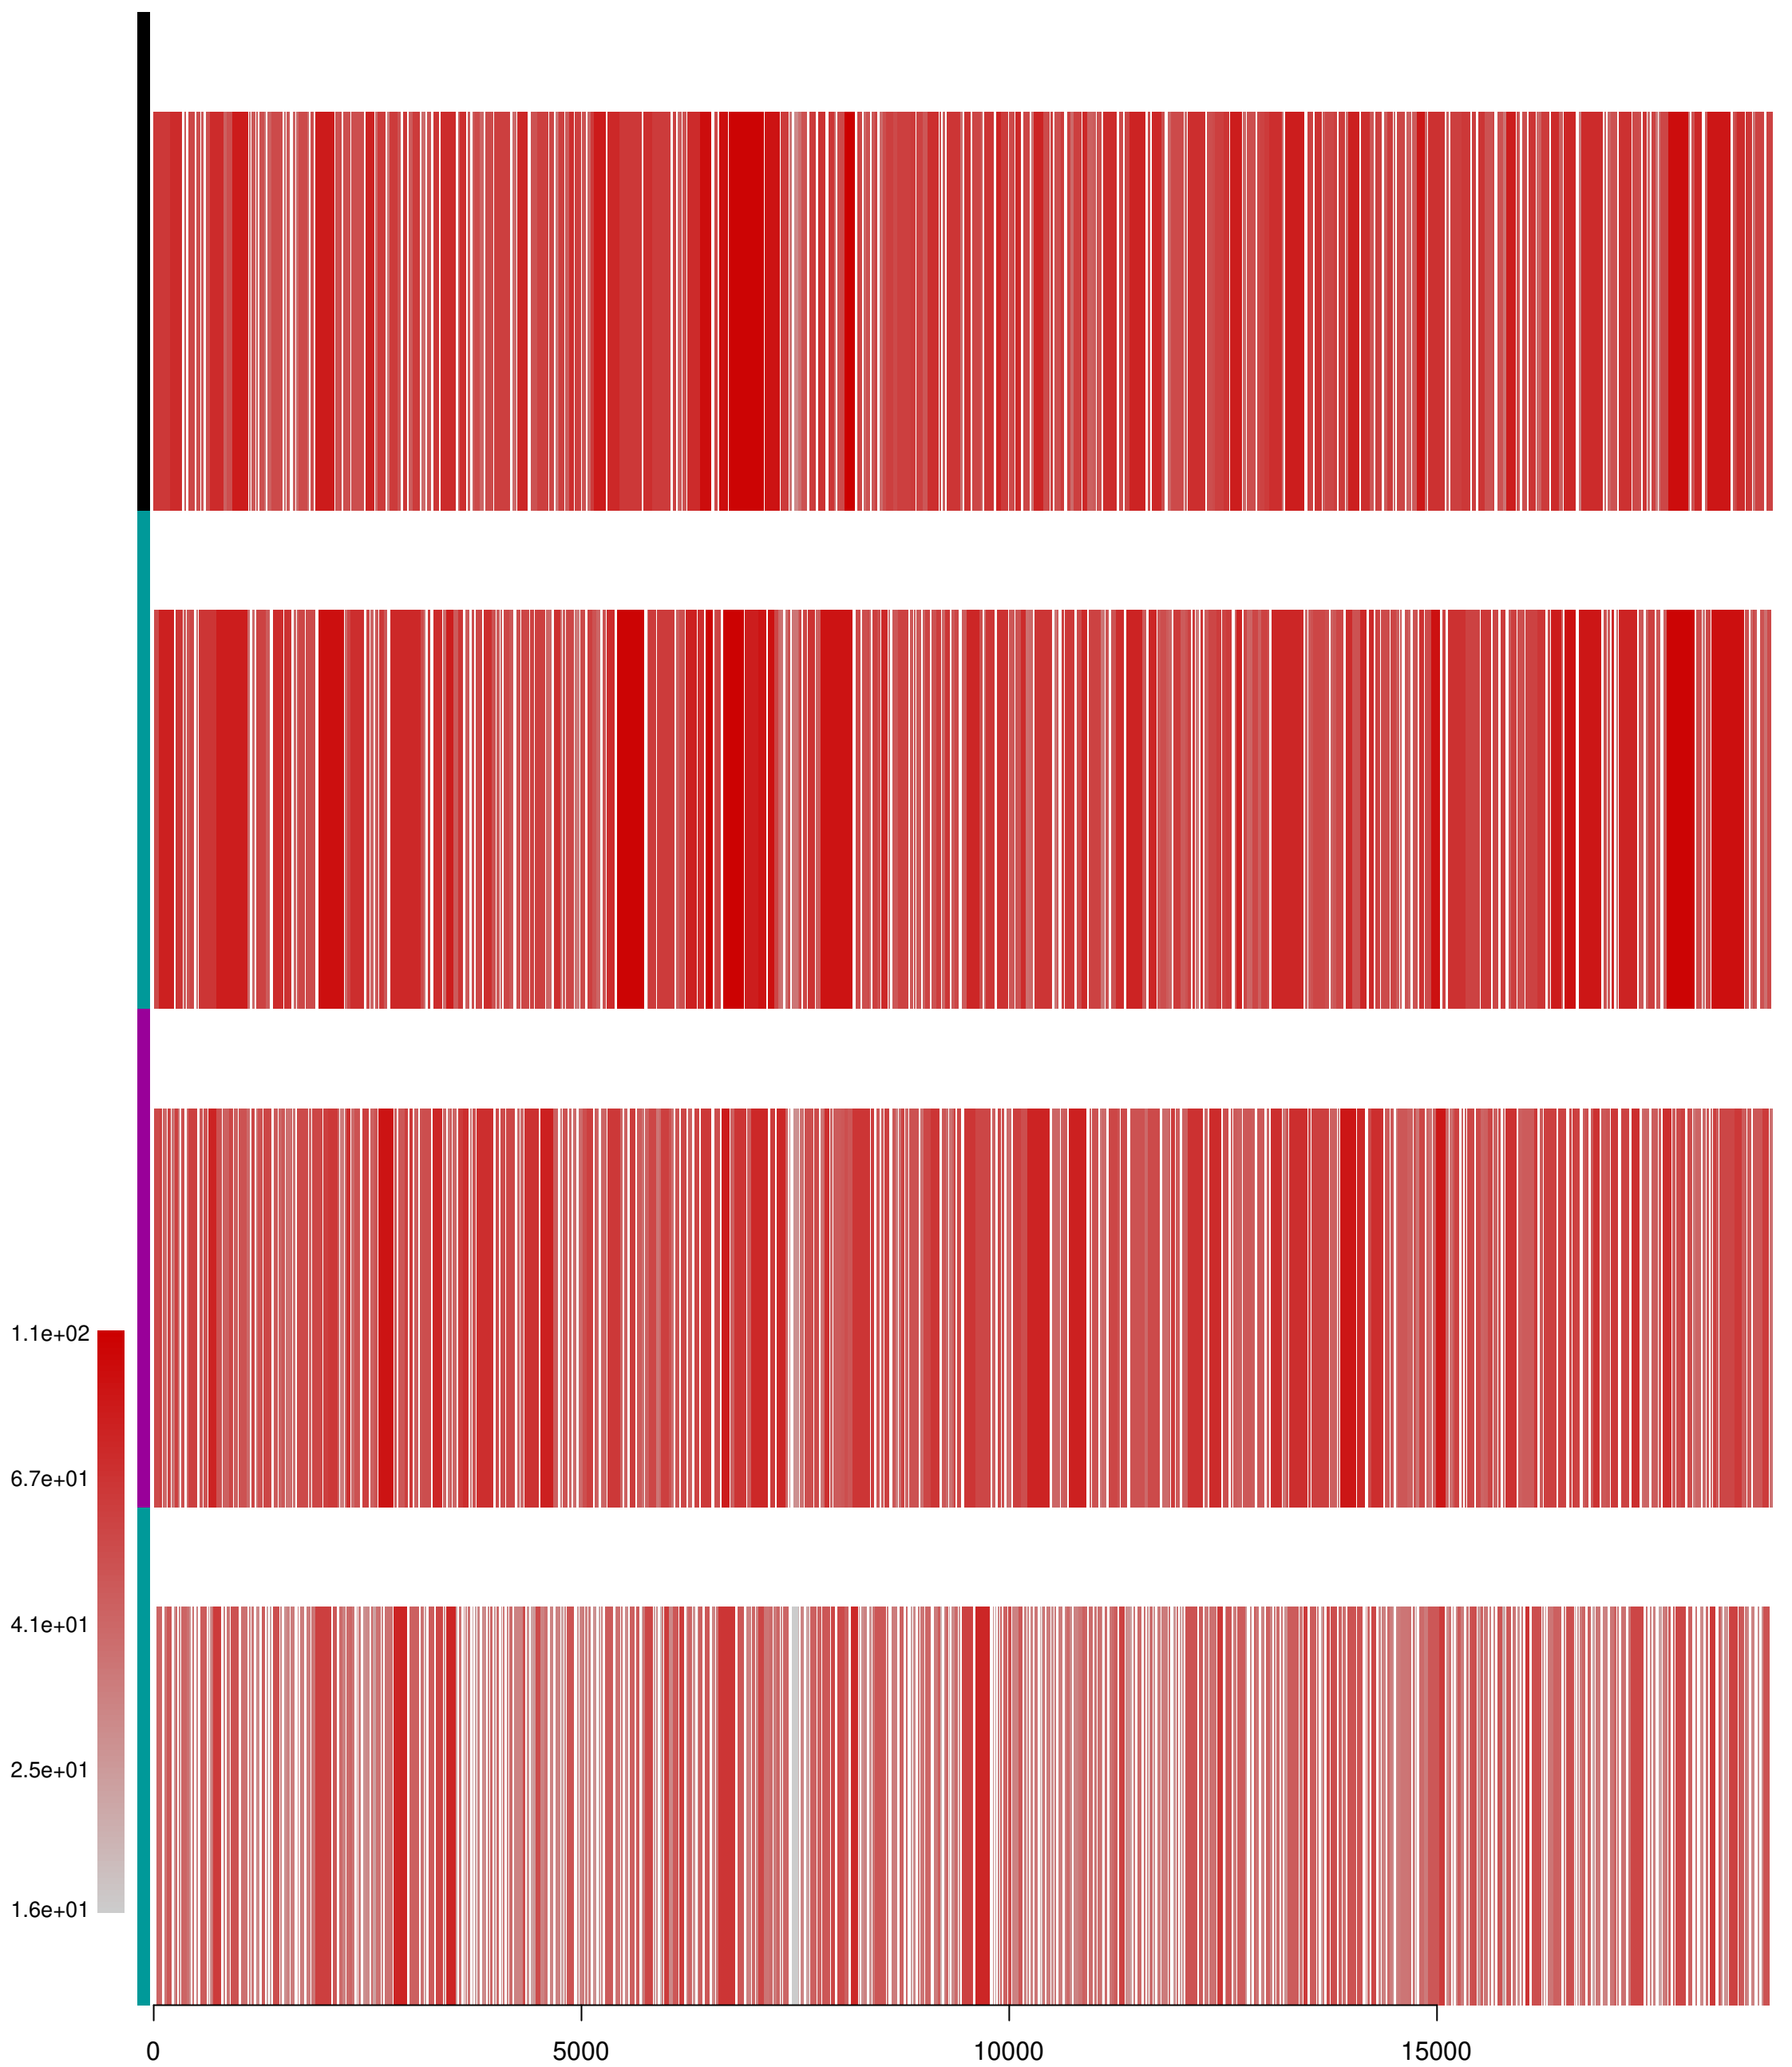

161 alignments above max size (1.0e+08)

Teleostei  
Sauria  
Aves  
Mammalia  
Eutheria  
Others

4.3e+02  
1.9e+02  
8.1e+01  
3.5e+01  
1.6e+01

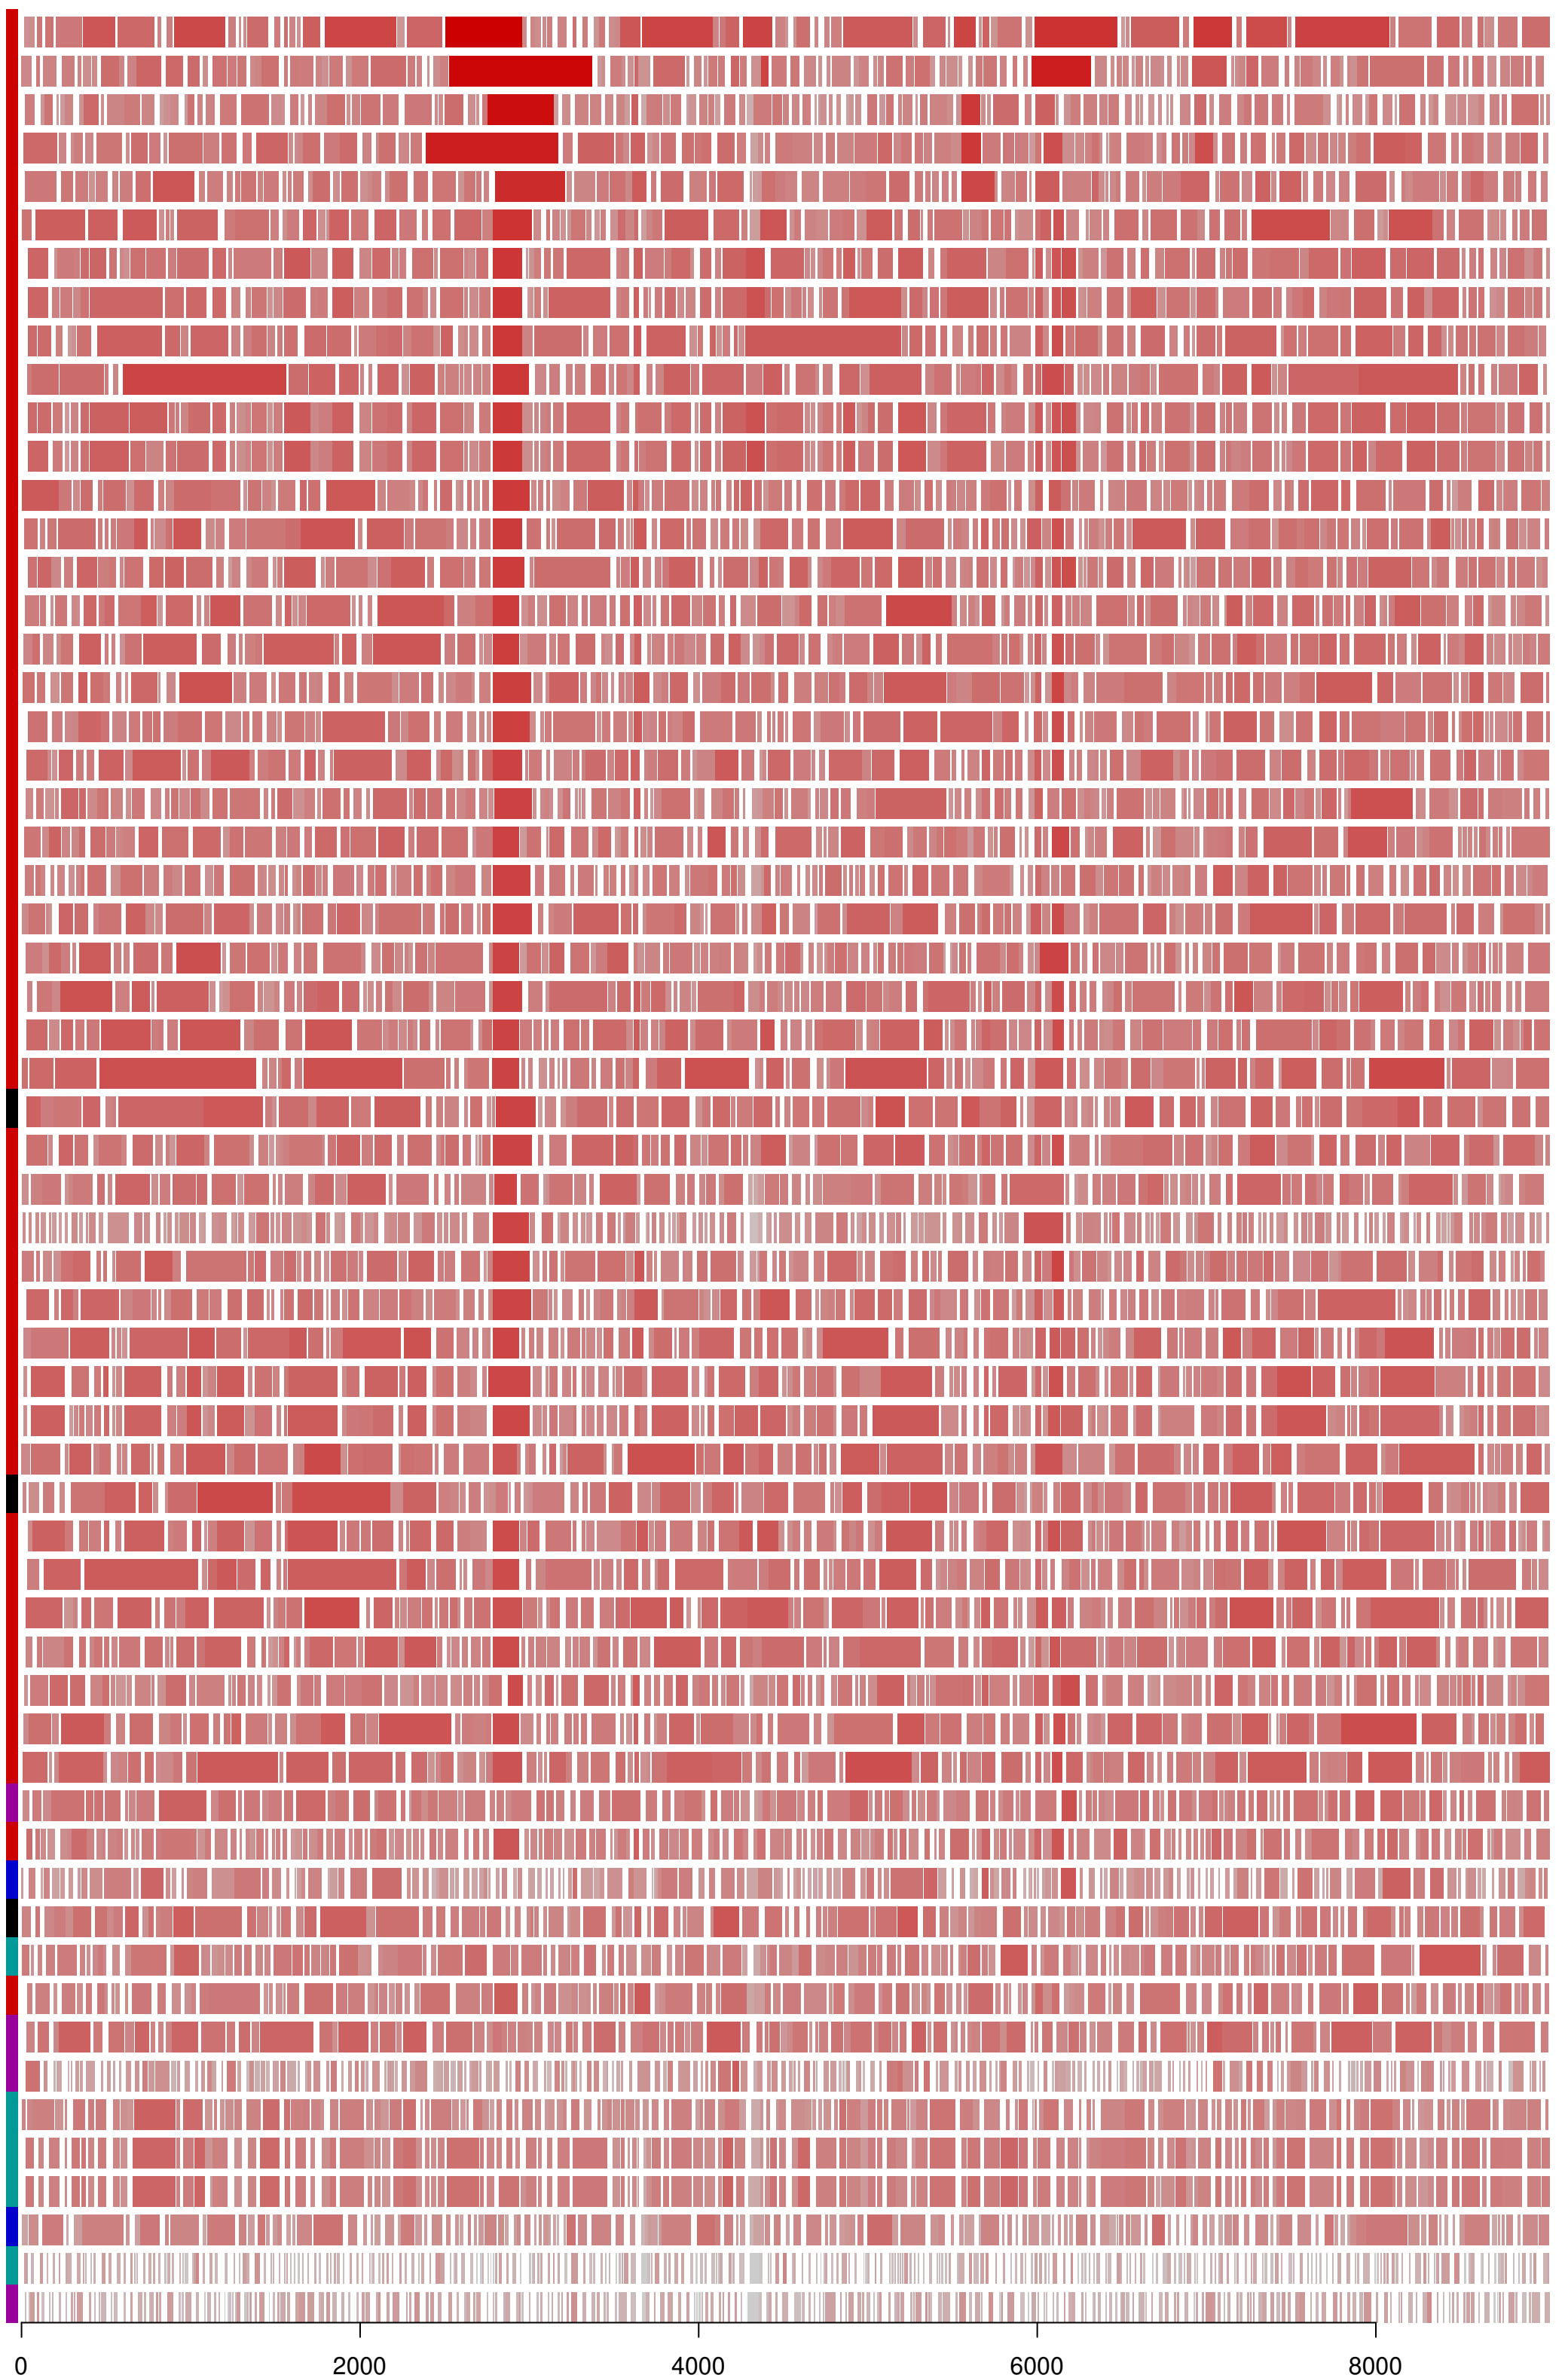

0 2000 4000 6000 8000

Teleostei  
Sauria  
Aves  
Mammalia  
Eutheria  
Others

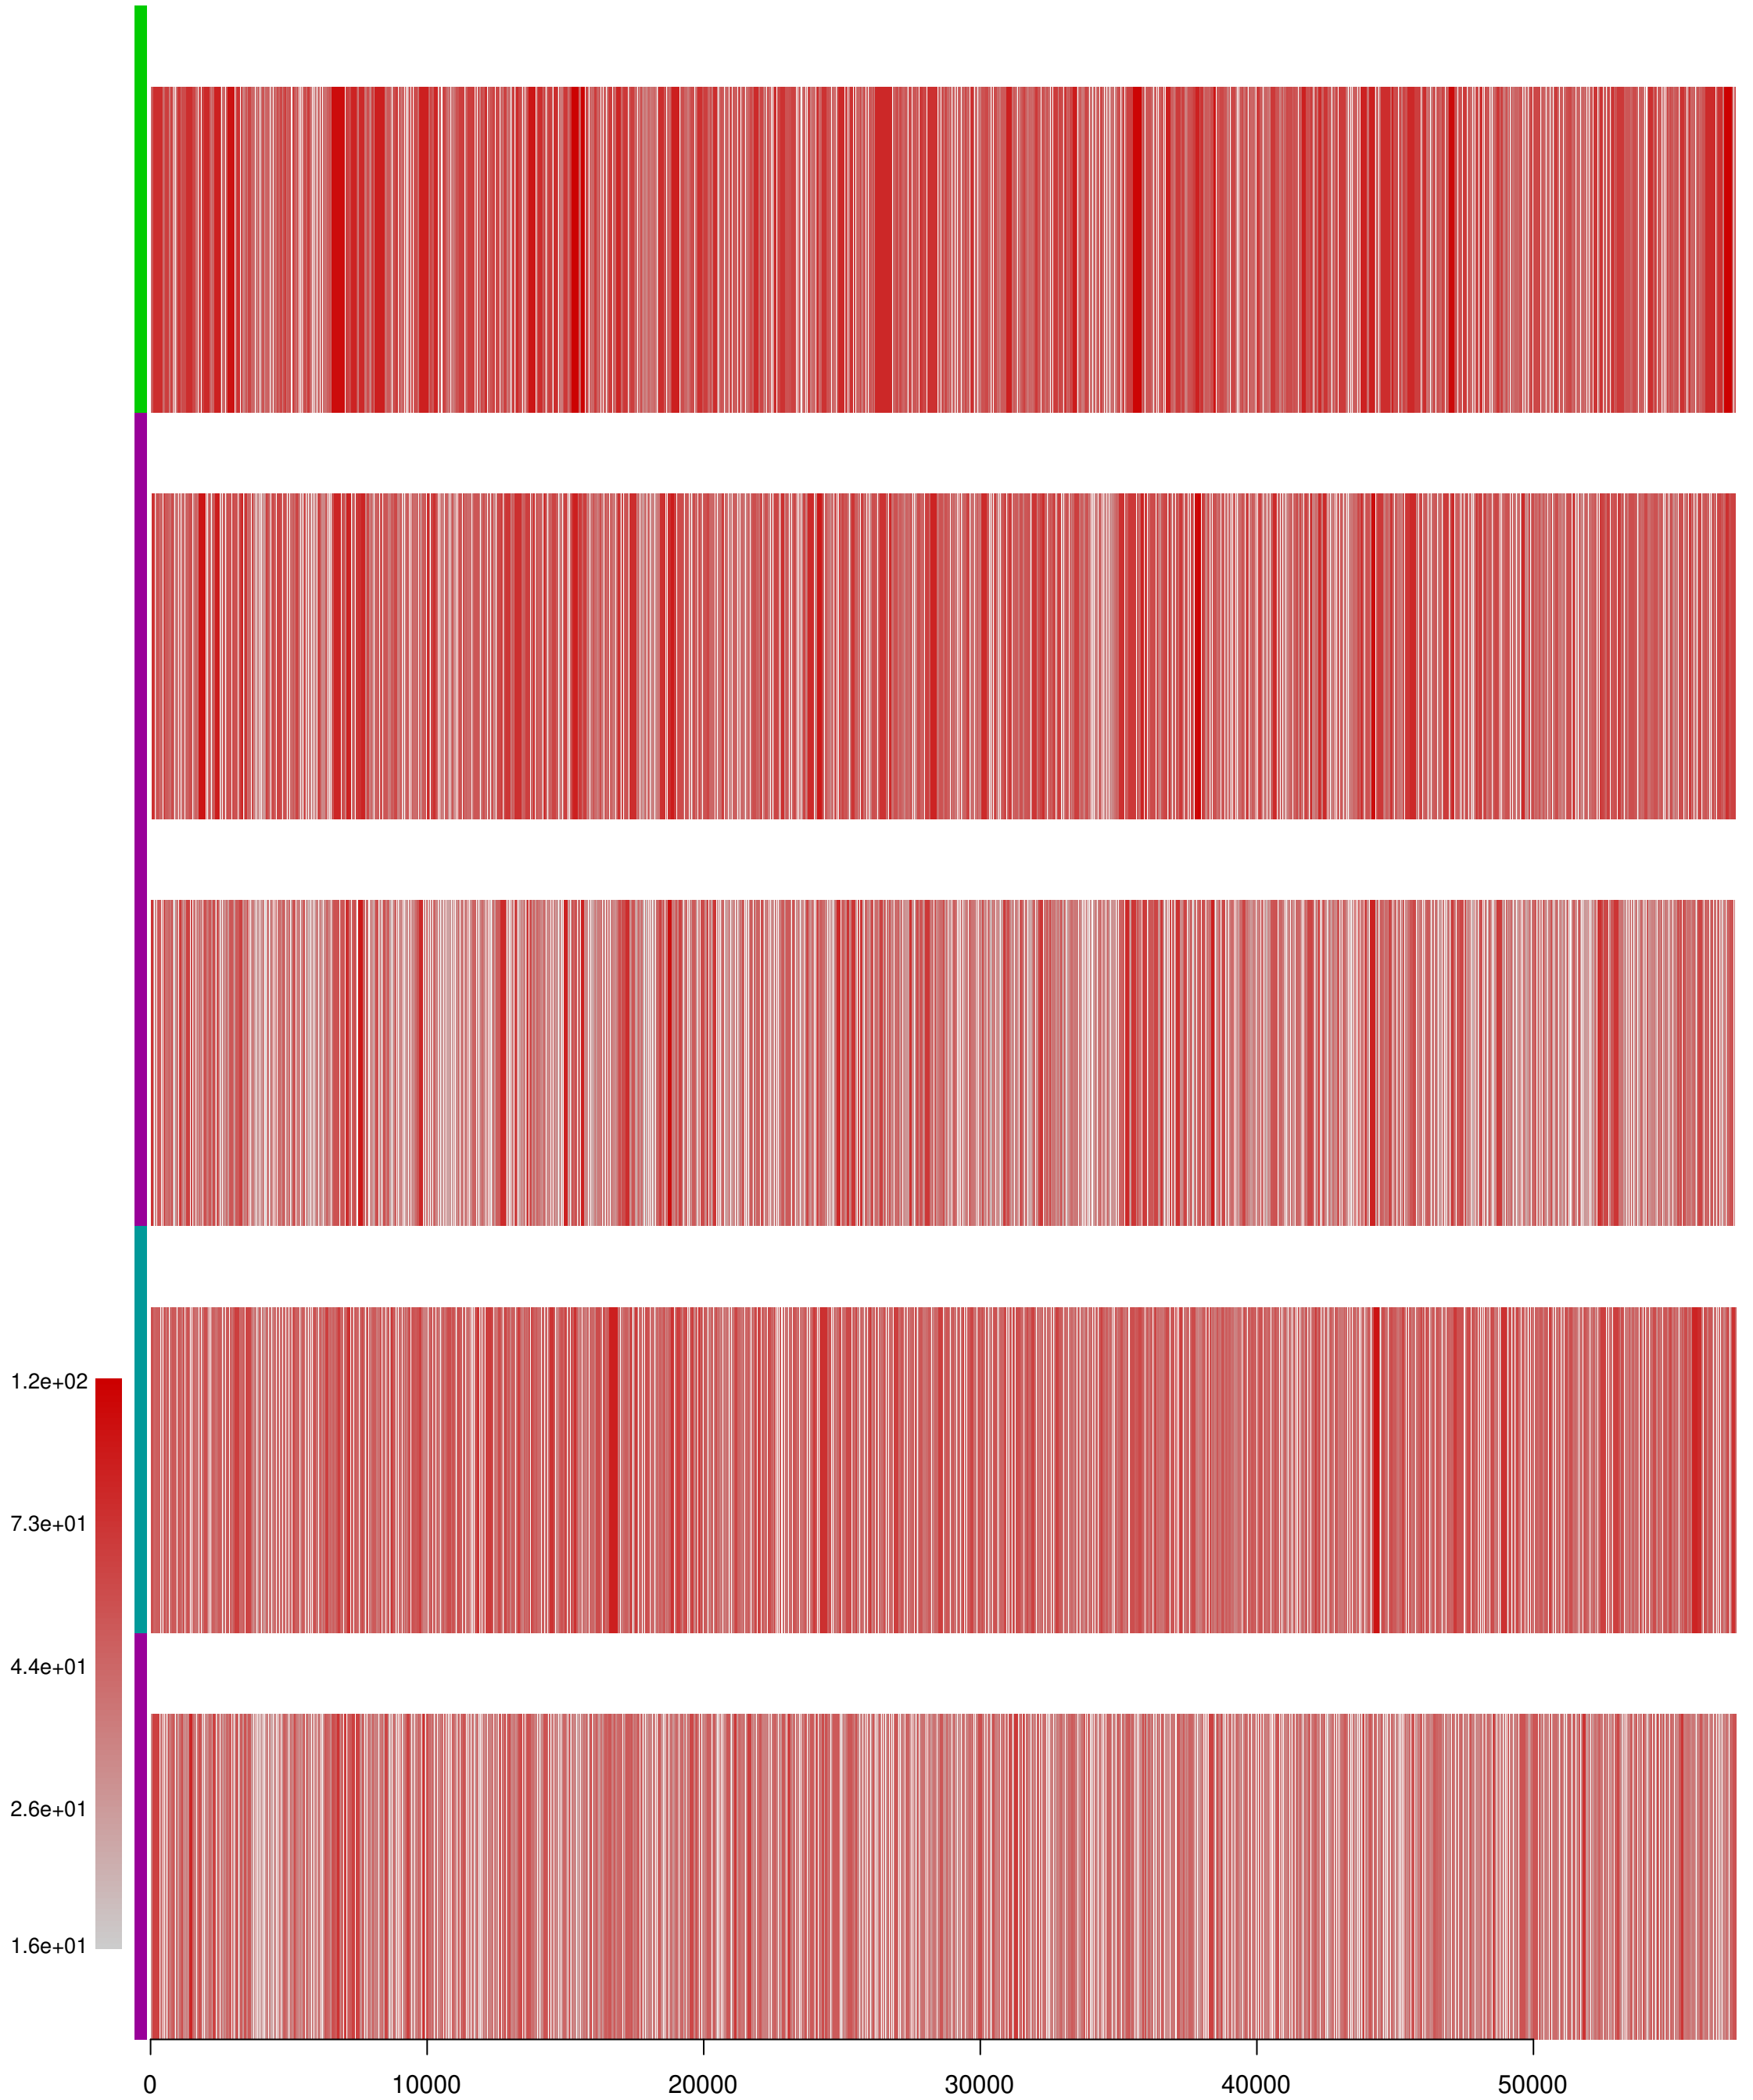

137 alignments above max size (1.0e+08)

Teleostei  
Sauria  
Aves  
Mammalia  
Eutheria  
Others

9.7e+02  
3.4e+02  
1.2e+02  
4.3e+01  
1.6e+01

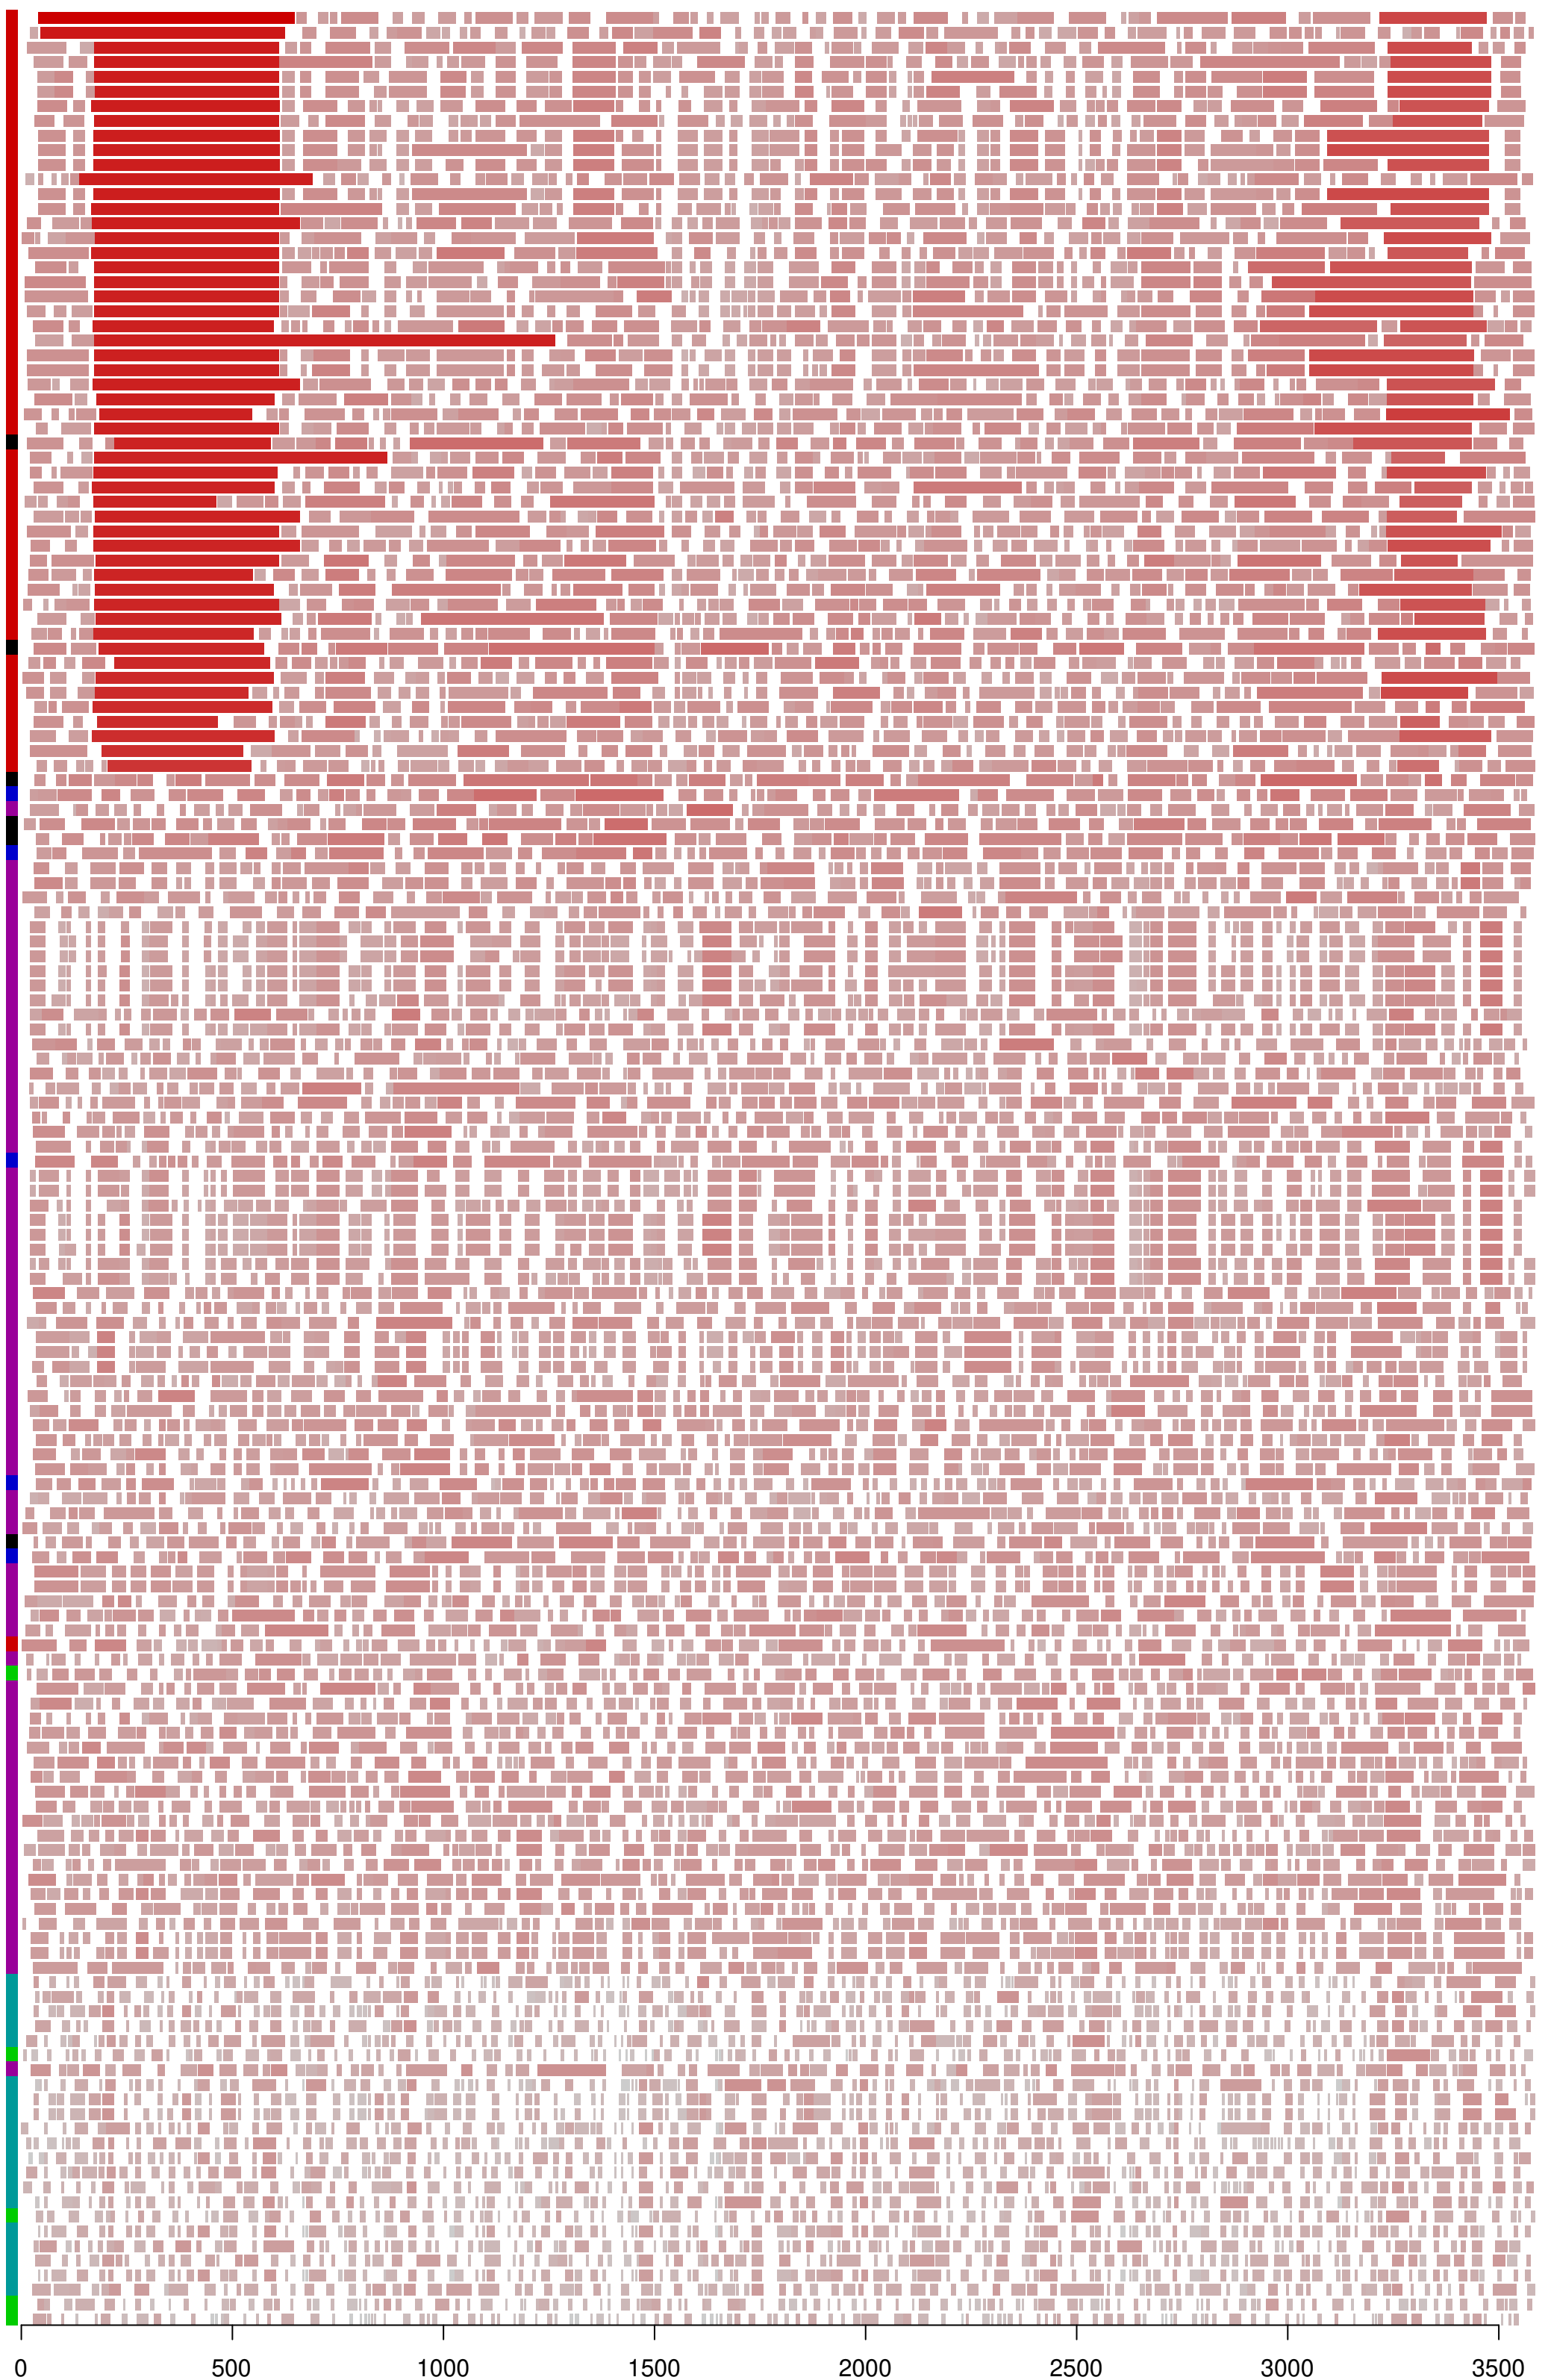

Teleostei  
Sauria  
Aves  
Mammalia  
Eutheria  
Others

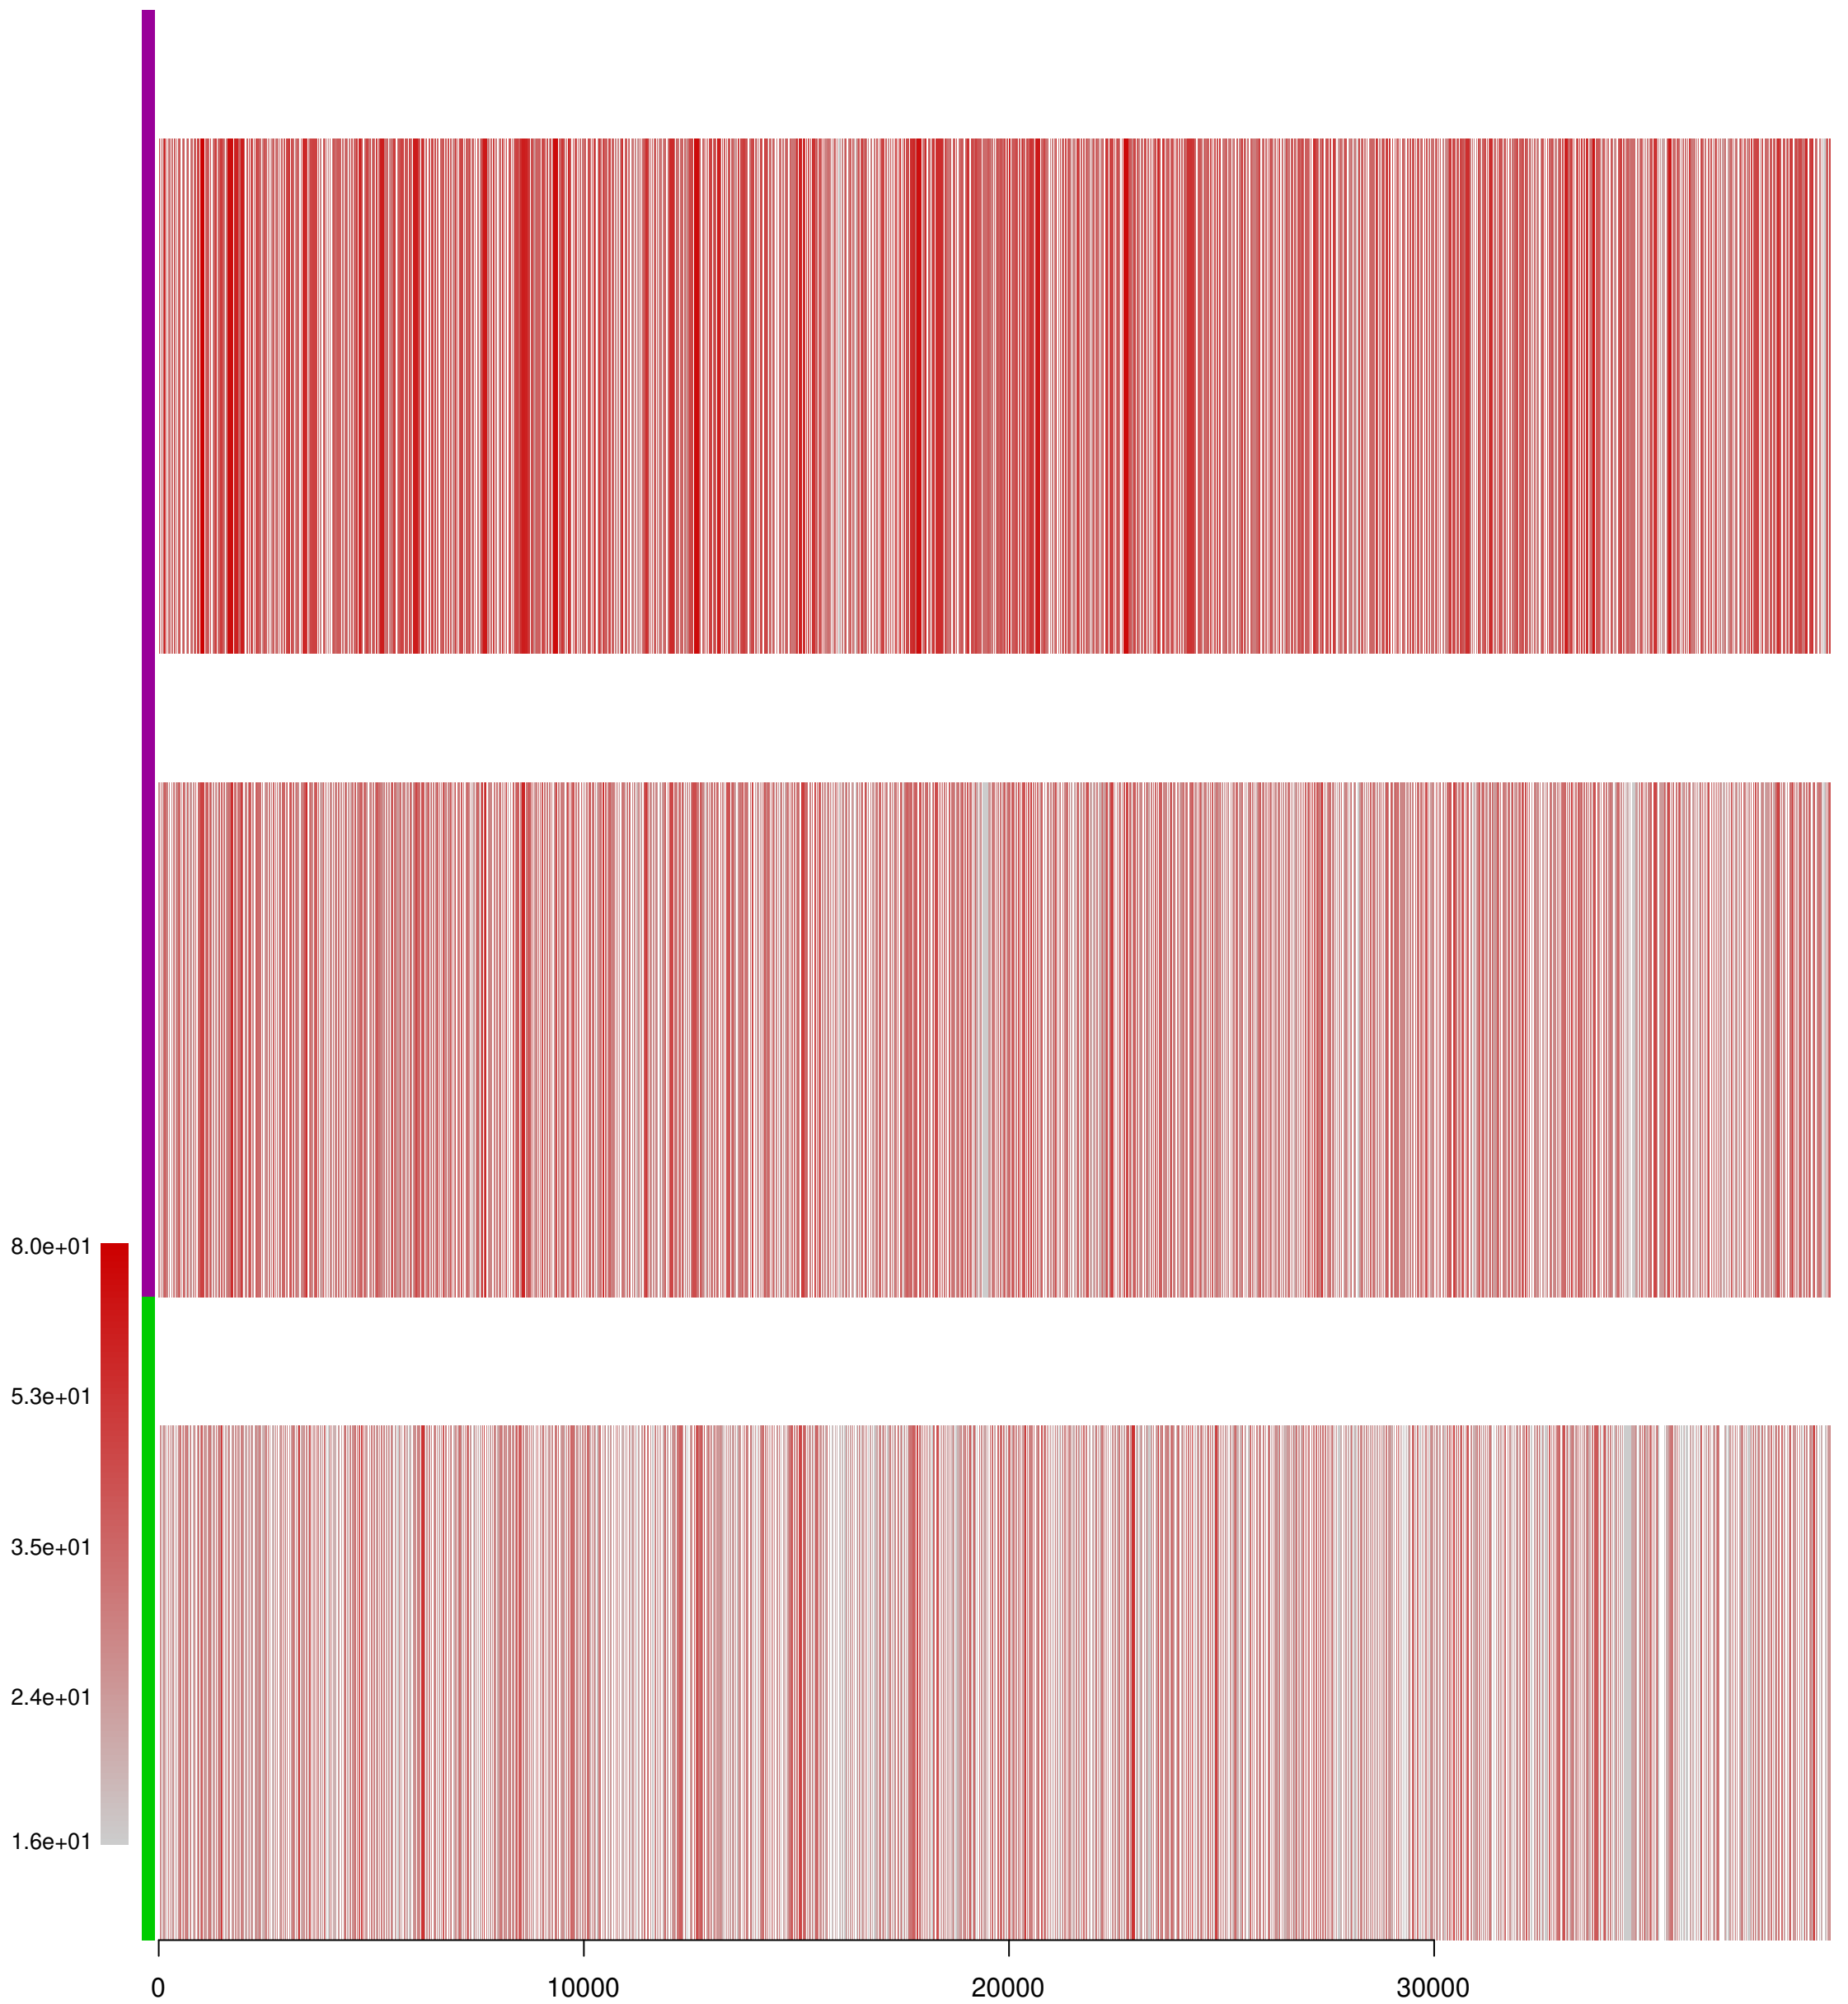

Teleostei  
Sauria  
Aves  
Mammalia  
Eutheria  
Others

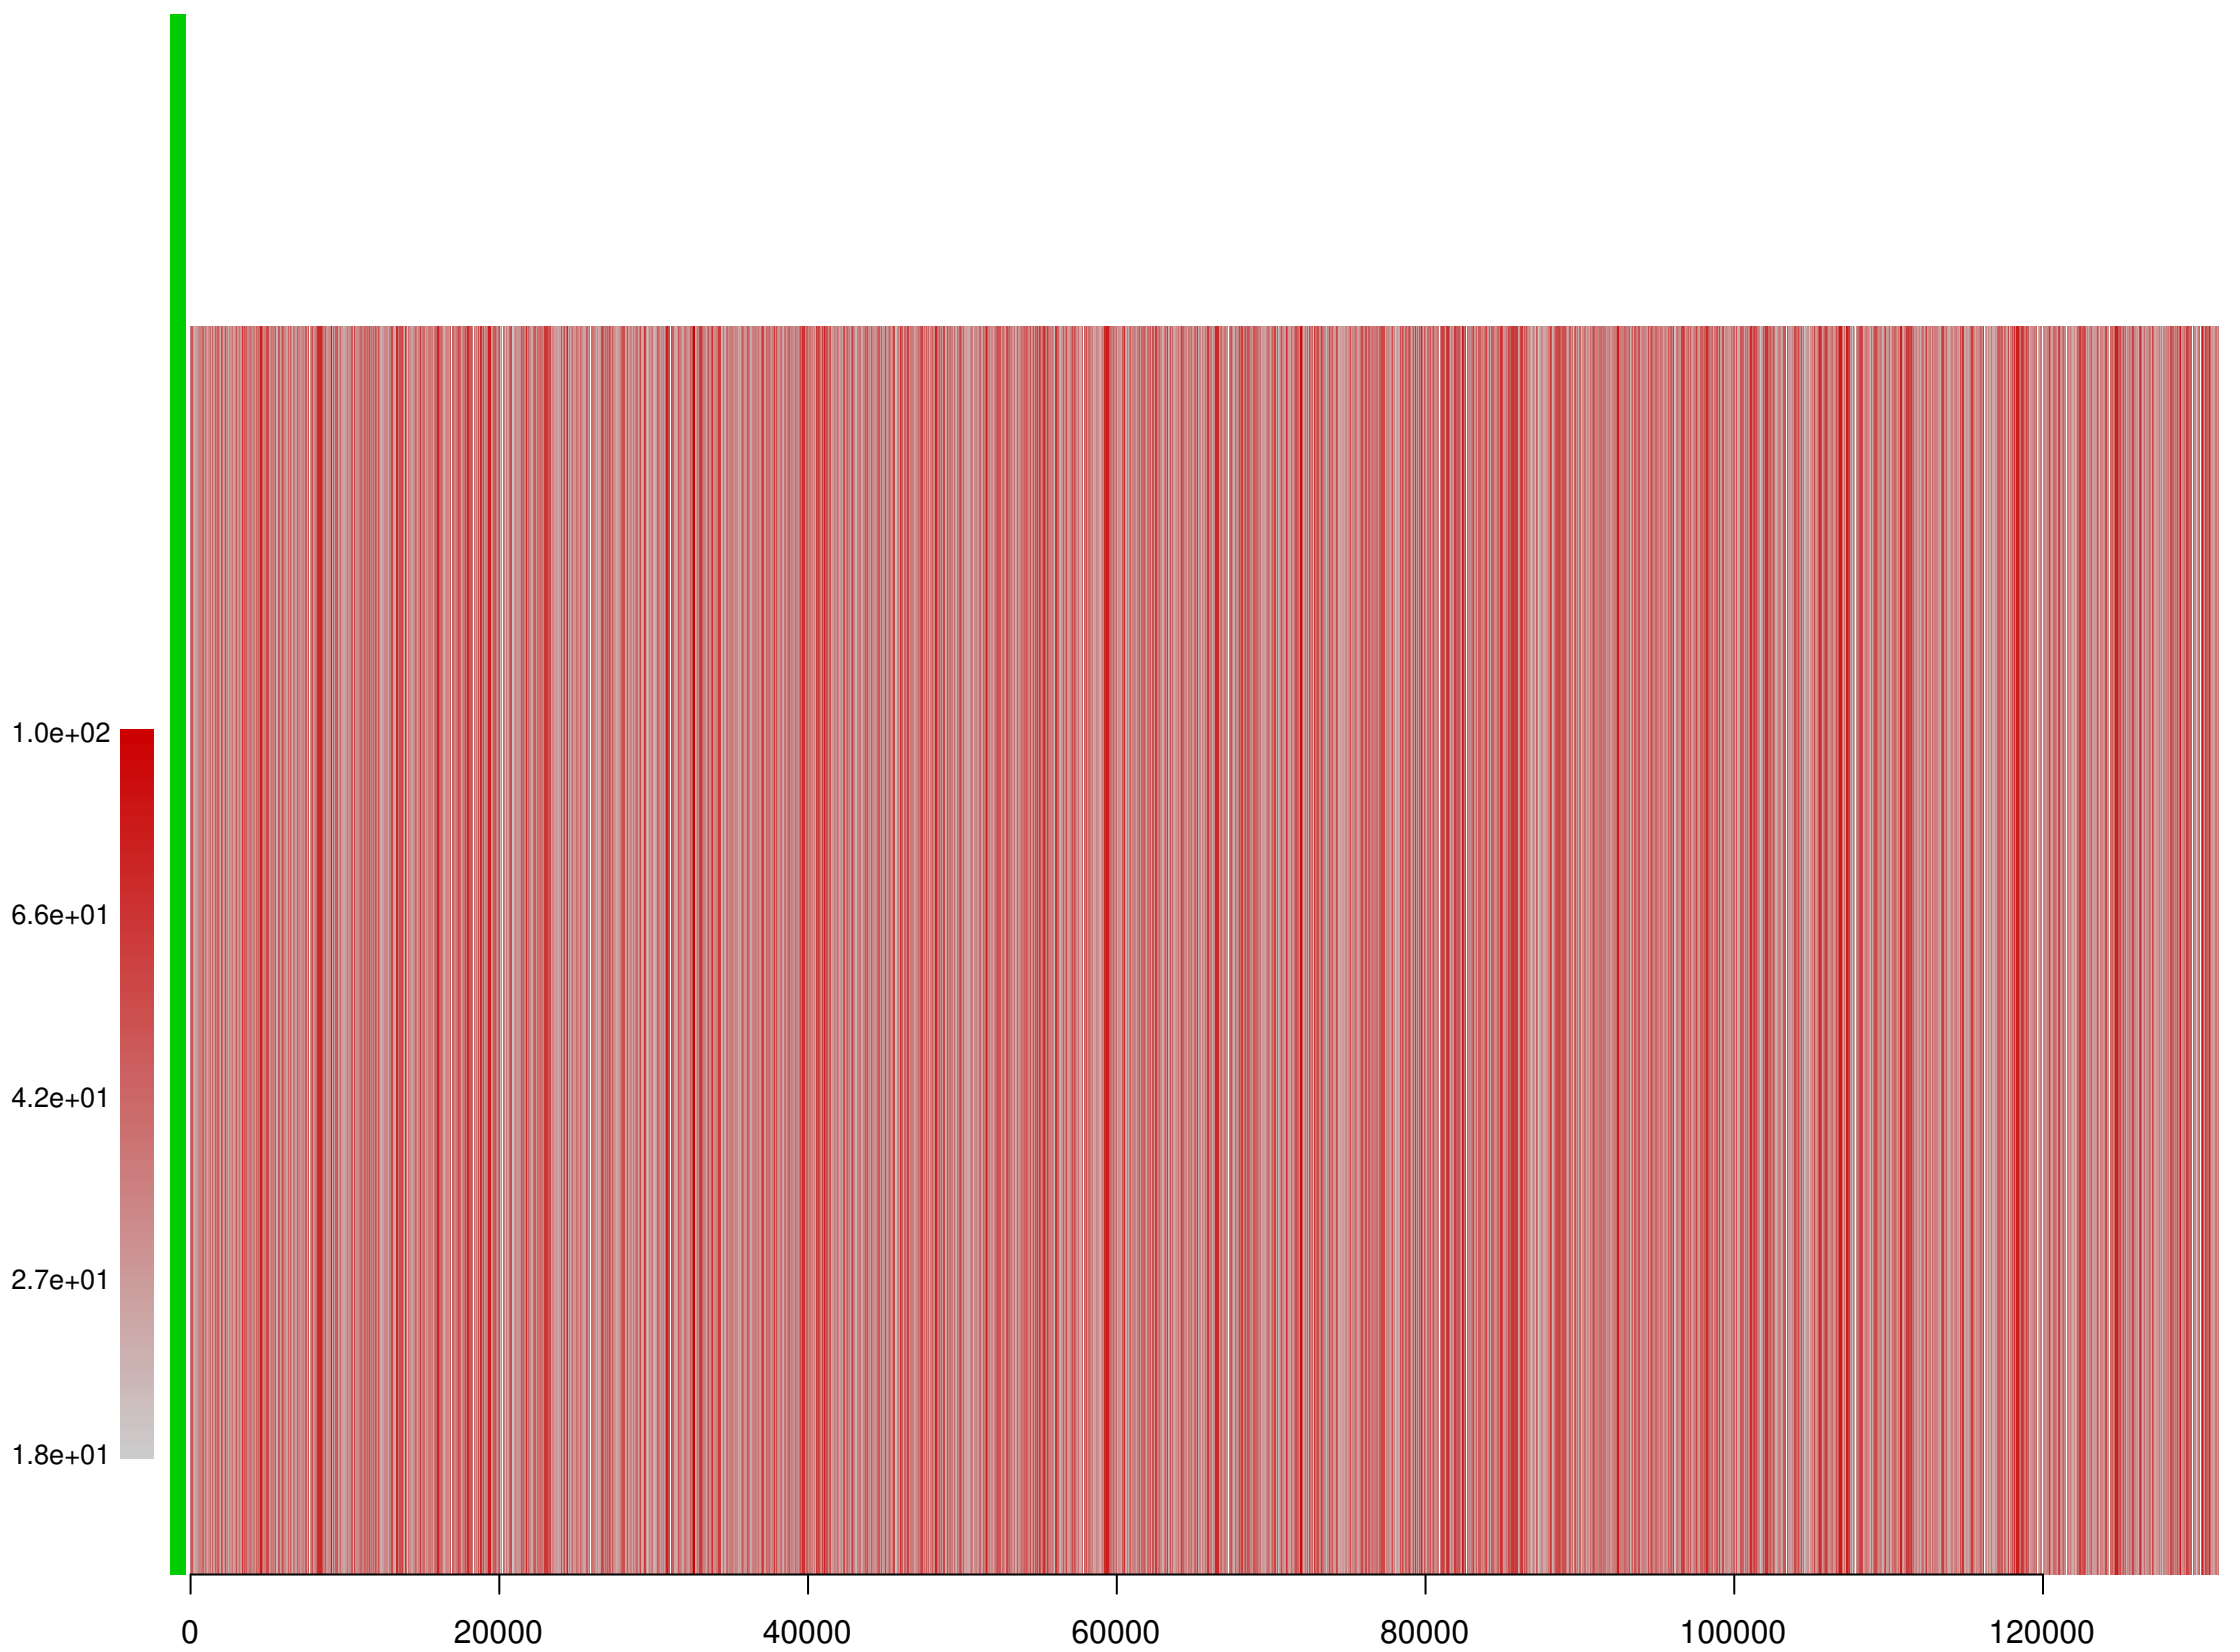

145 alignments above max size (1.0e+08)

Teleostei  
Sauria  
Aves  
Mammalia  
Eutheria  
Others

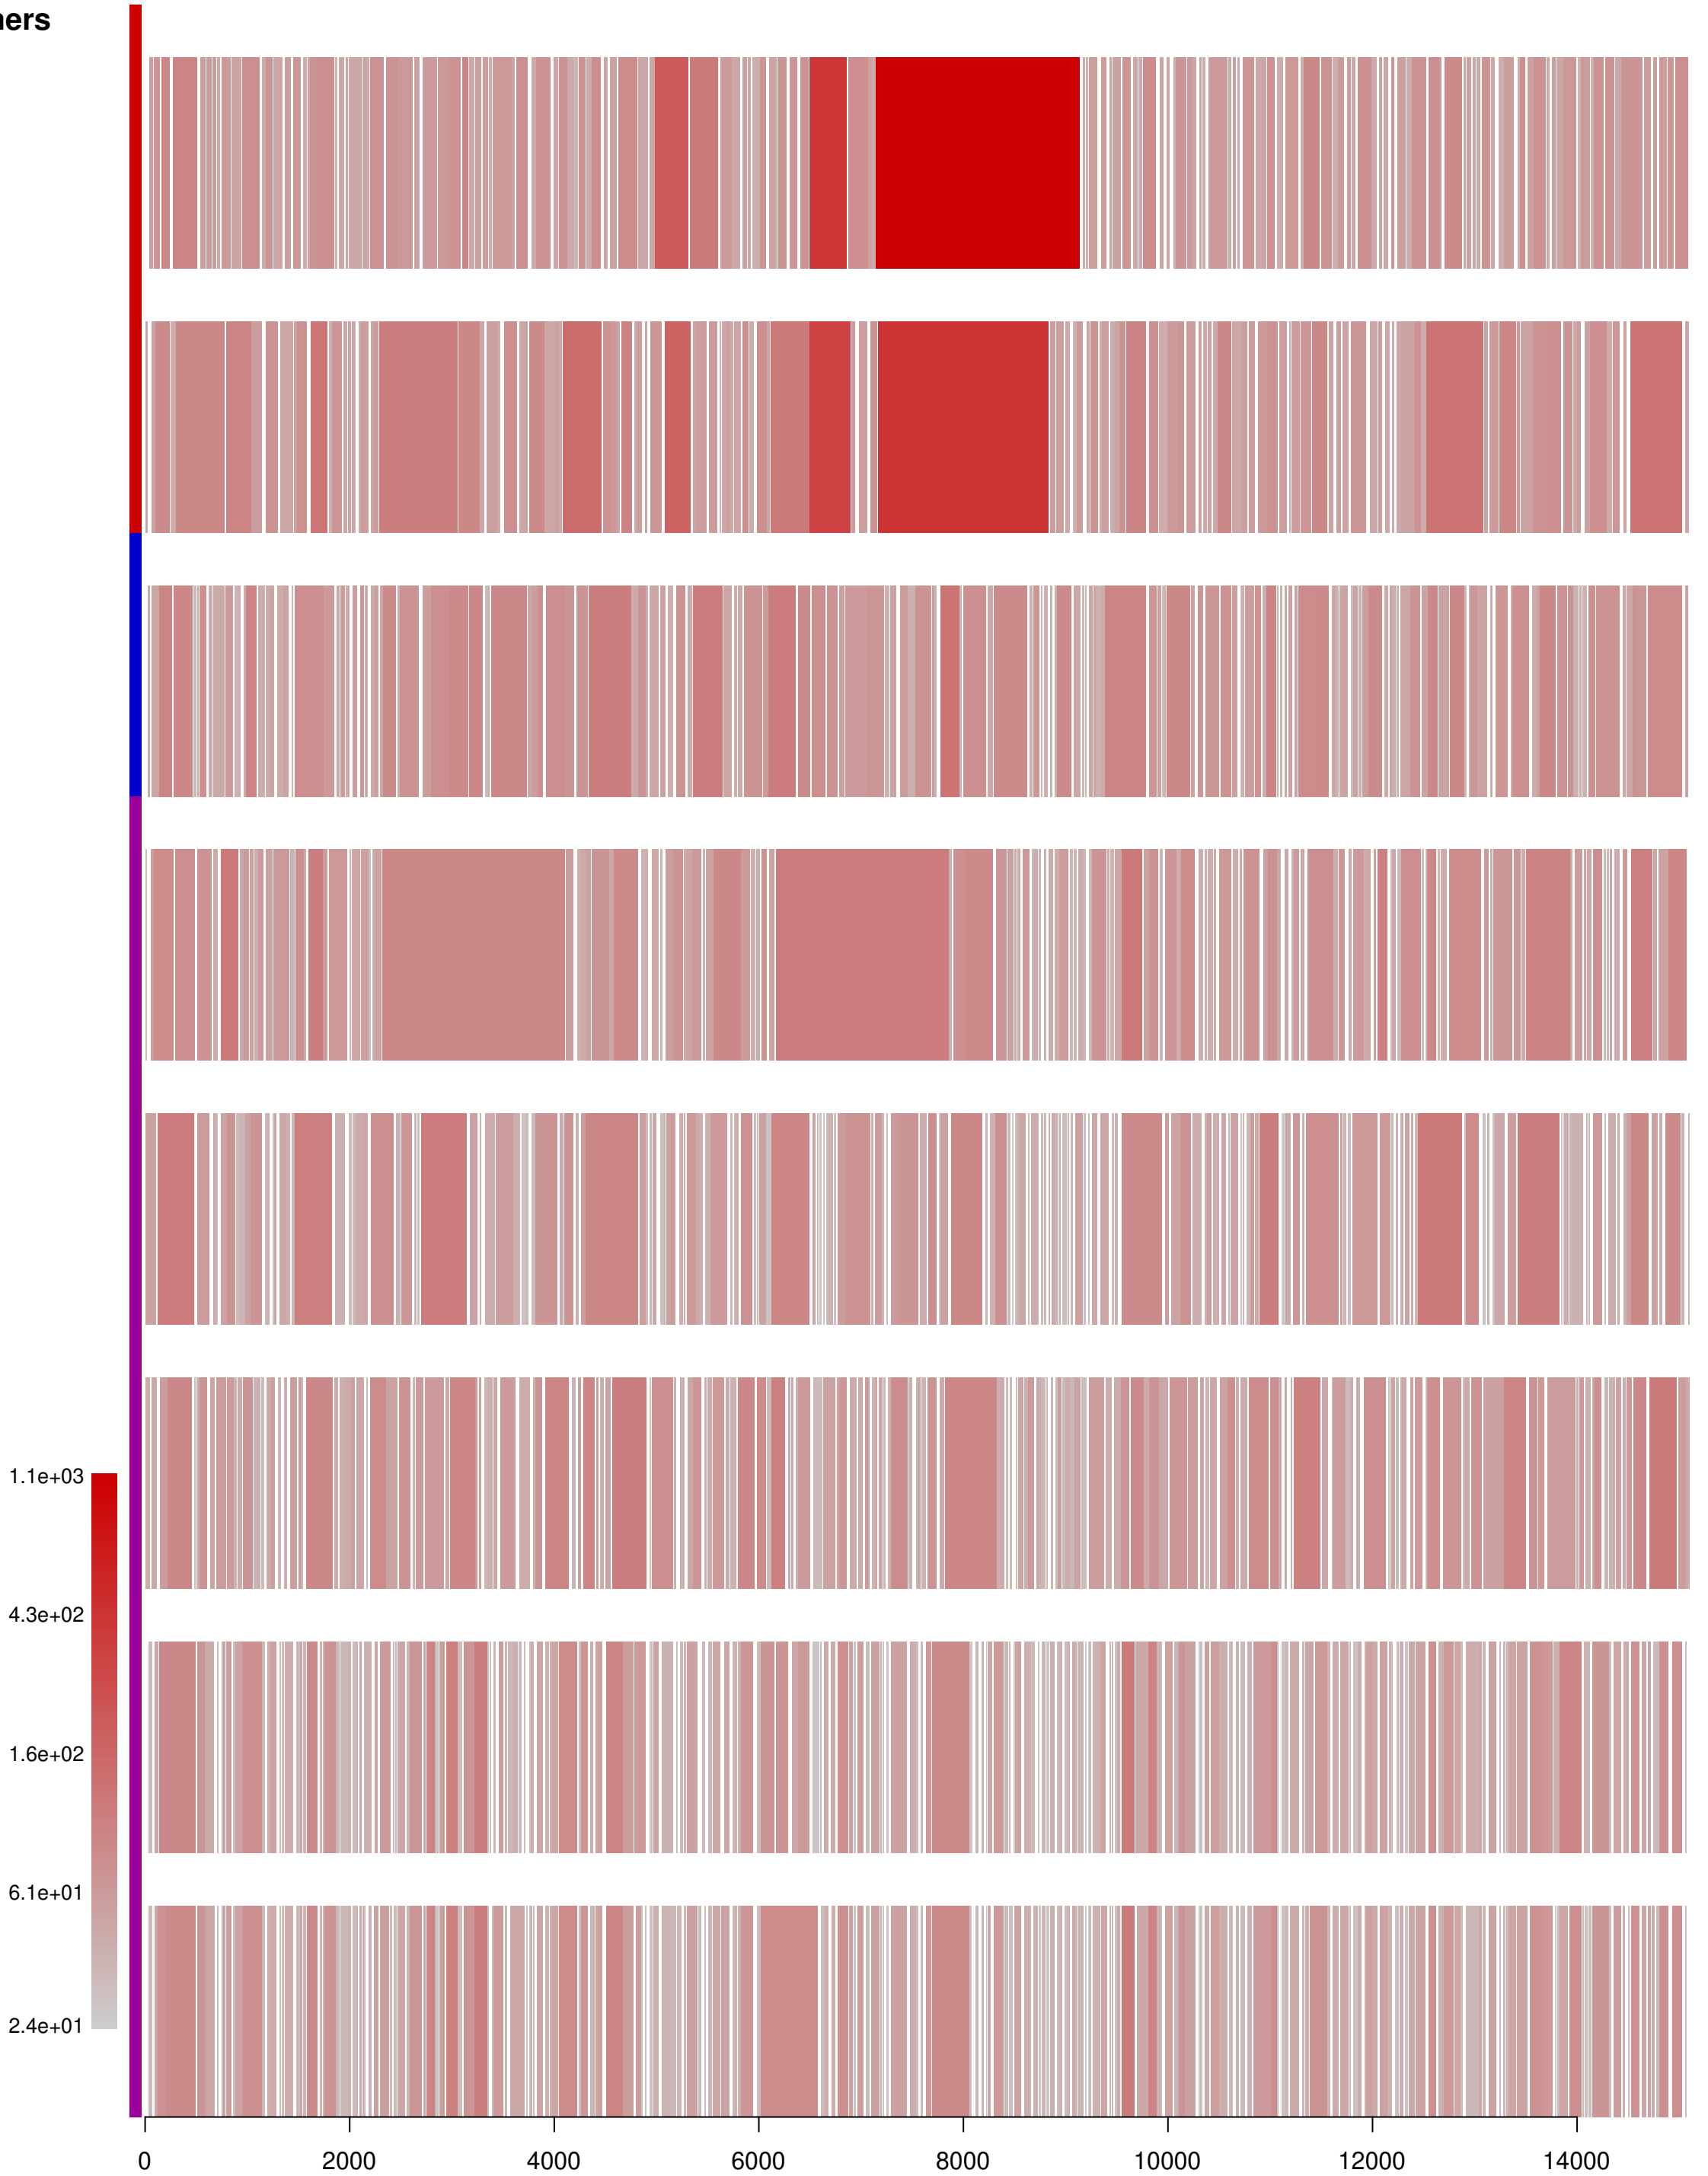

Teleostei  
Sauria  
Aves  
Mammalia  
Eutheria  
Others

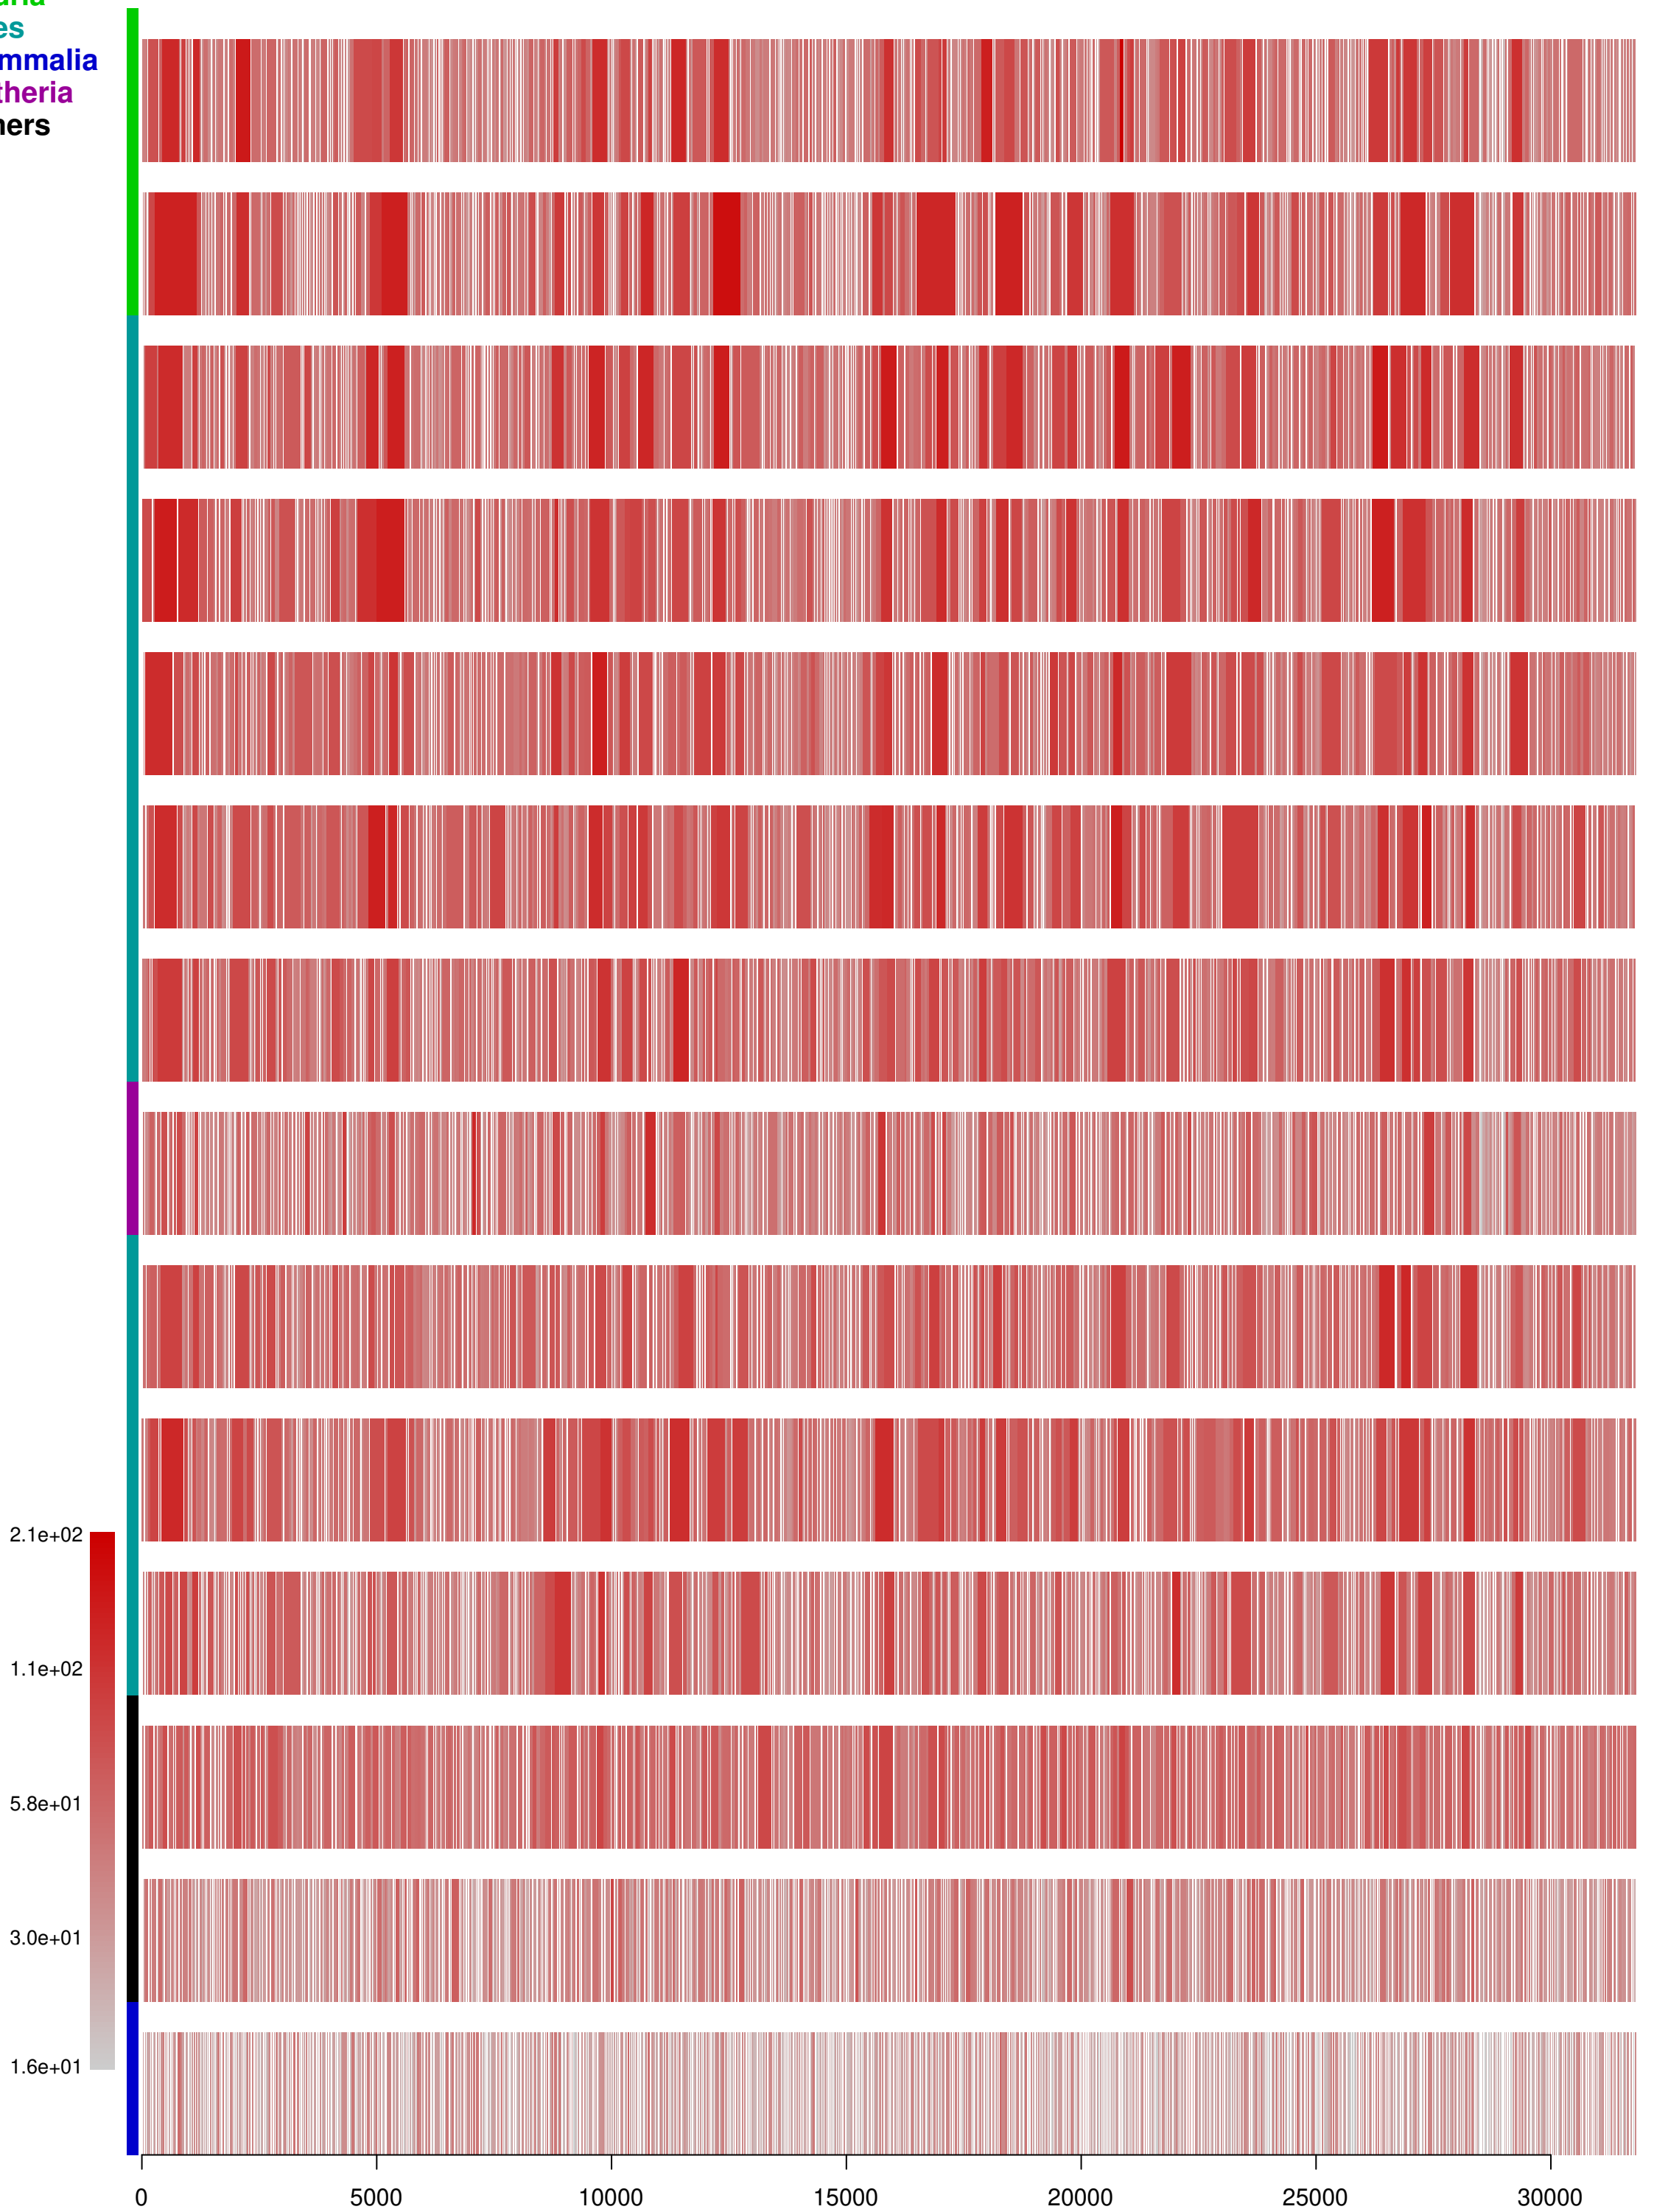

136 alignments above max size (1.0e+08)



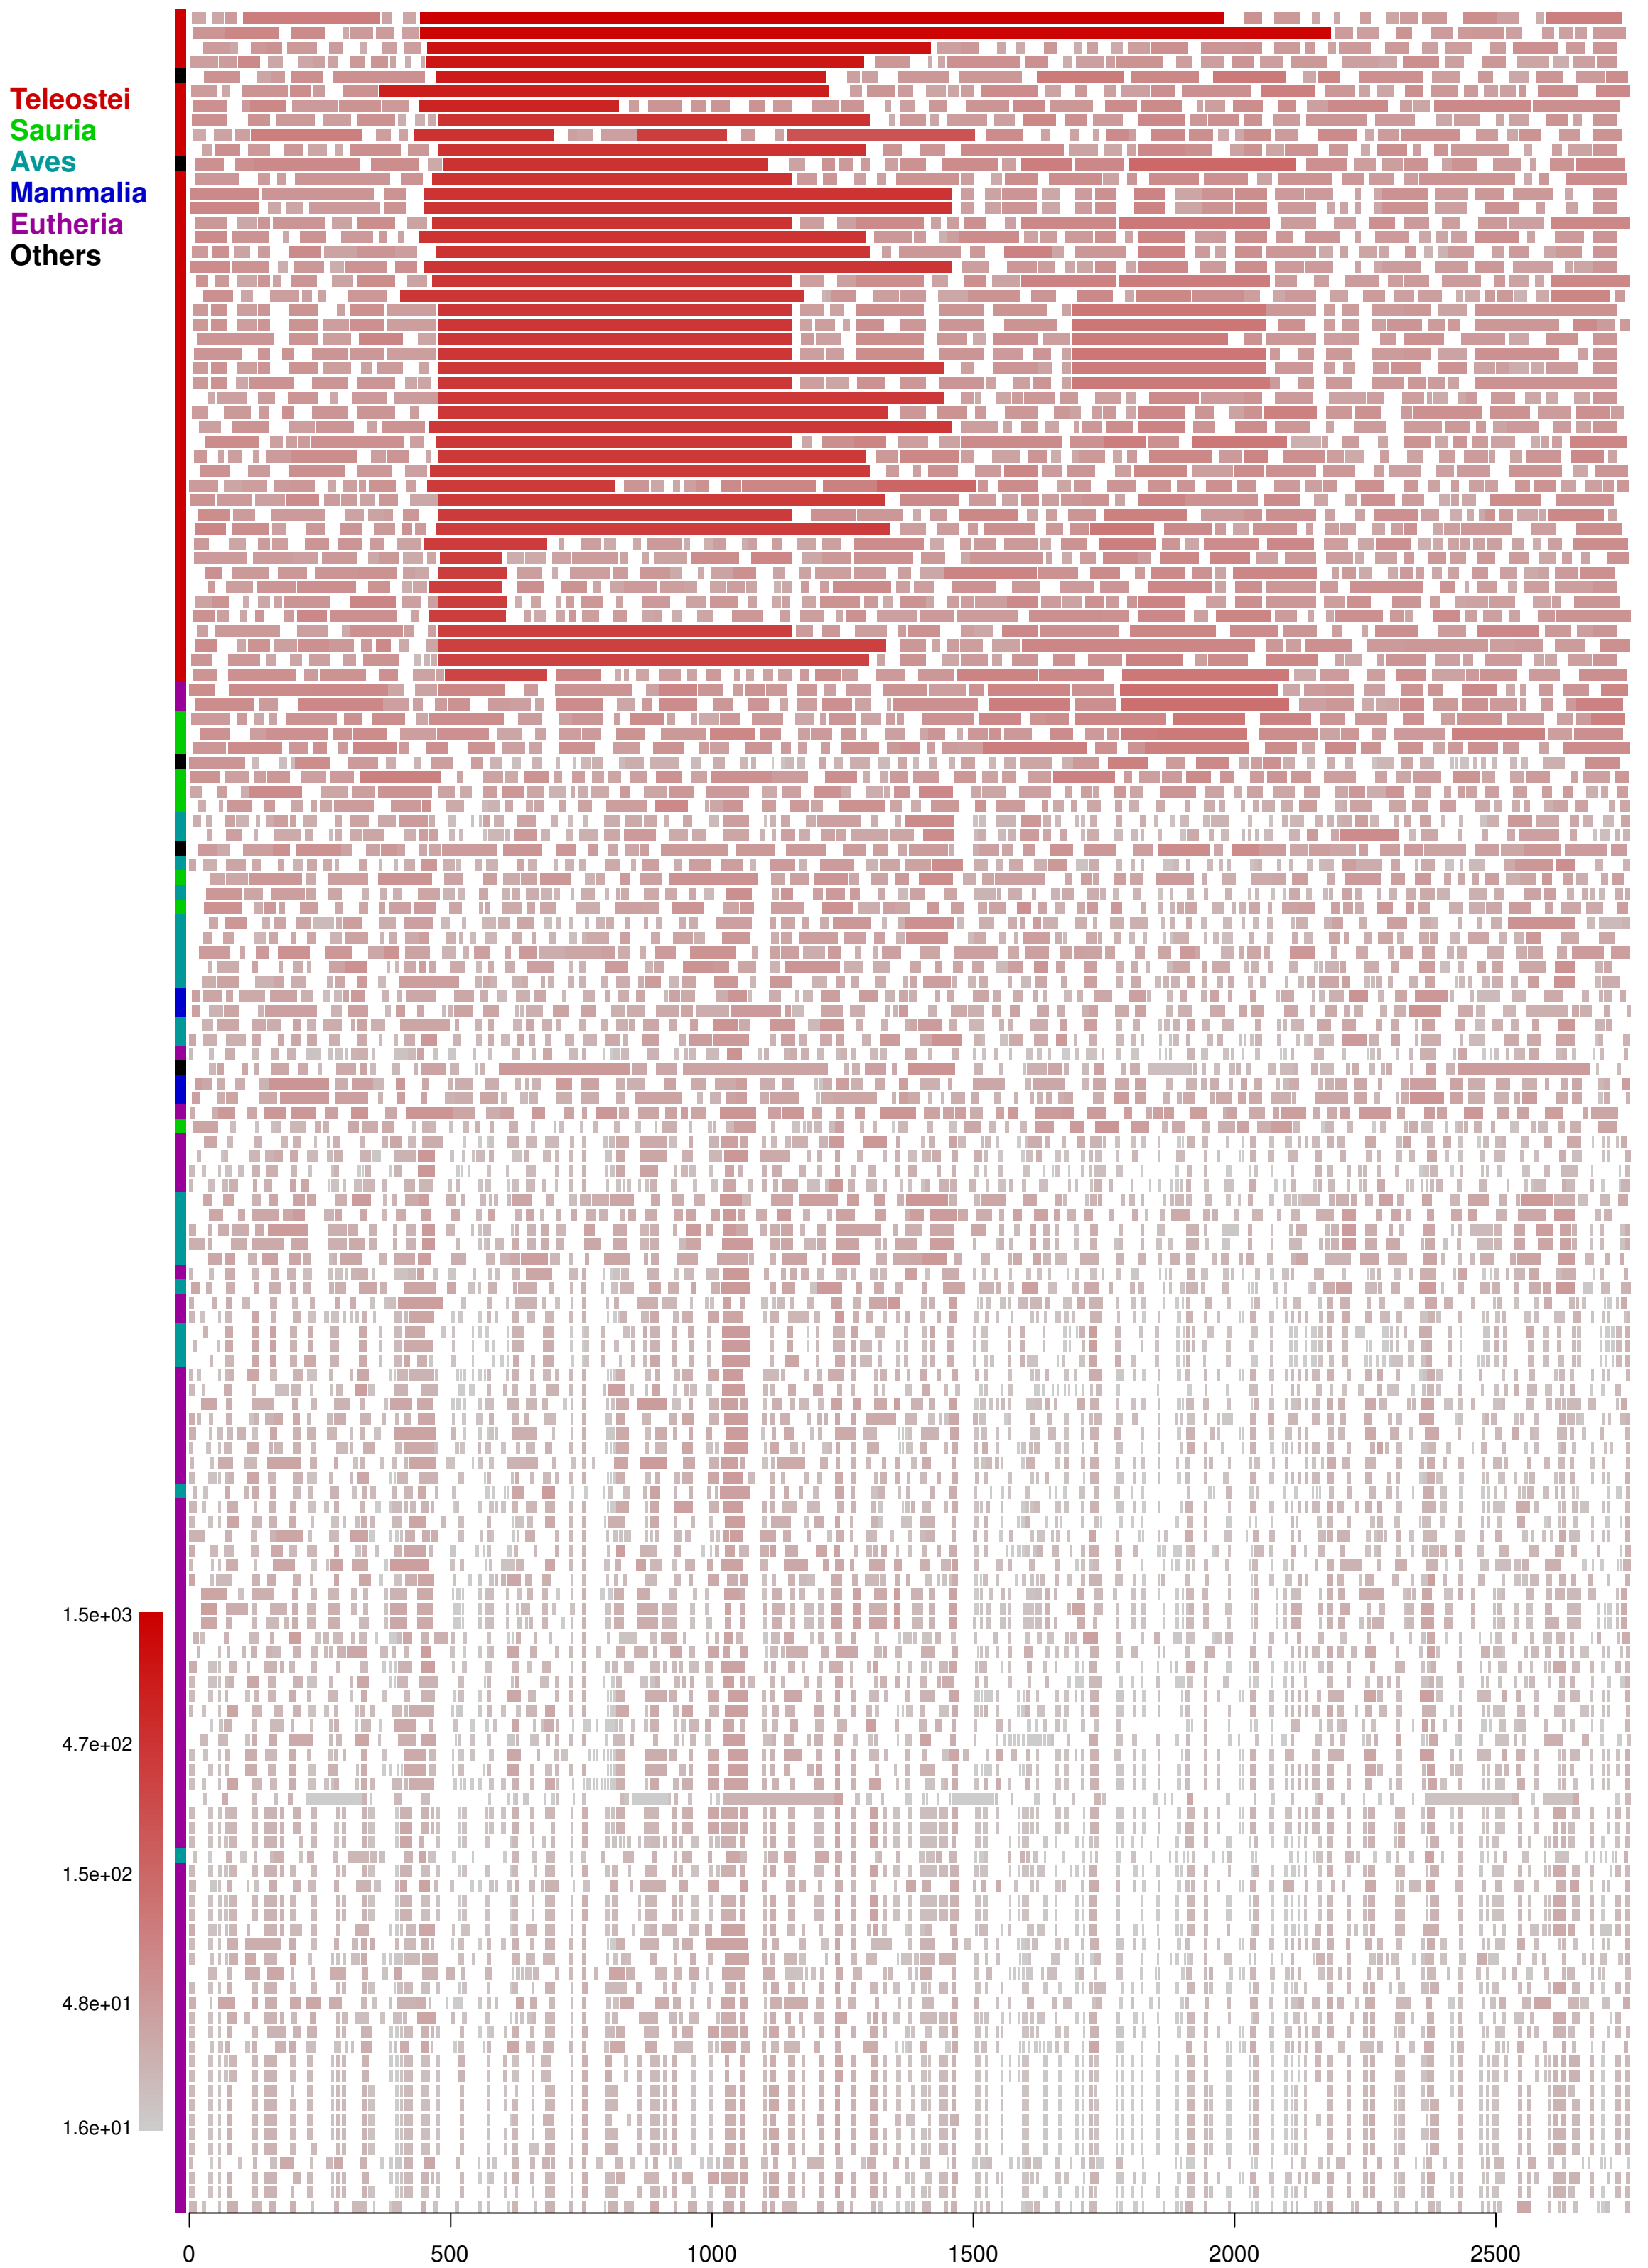

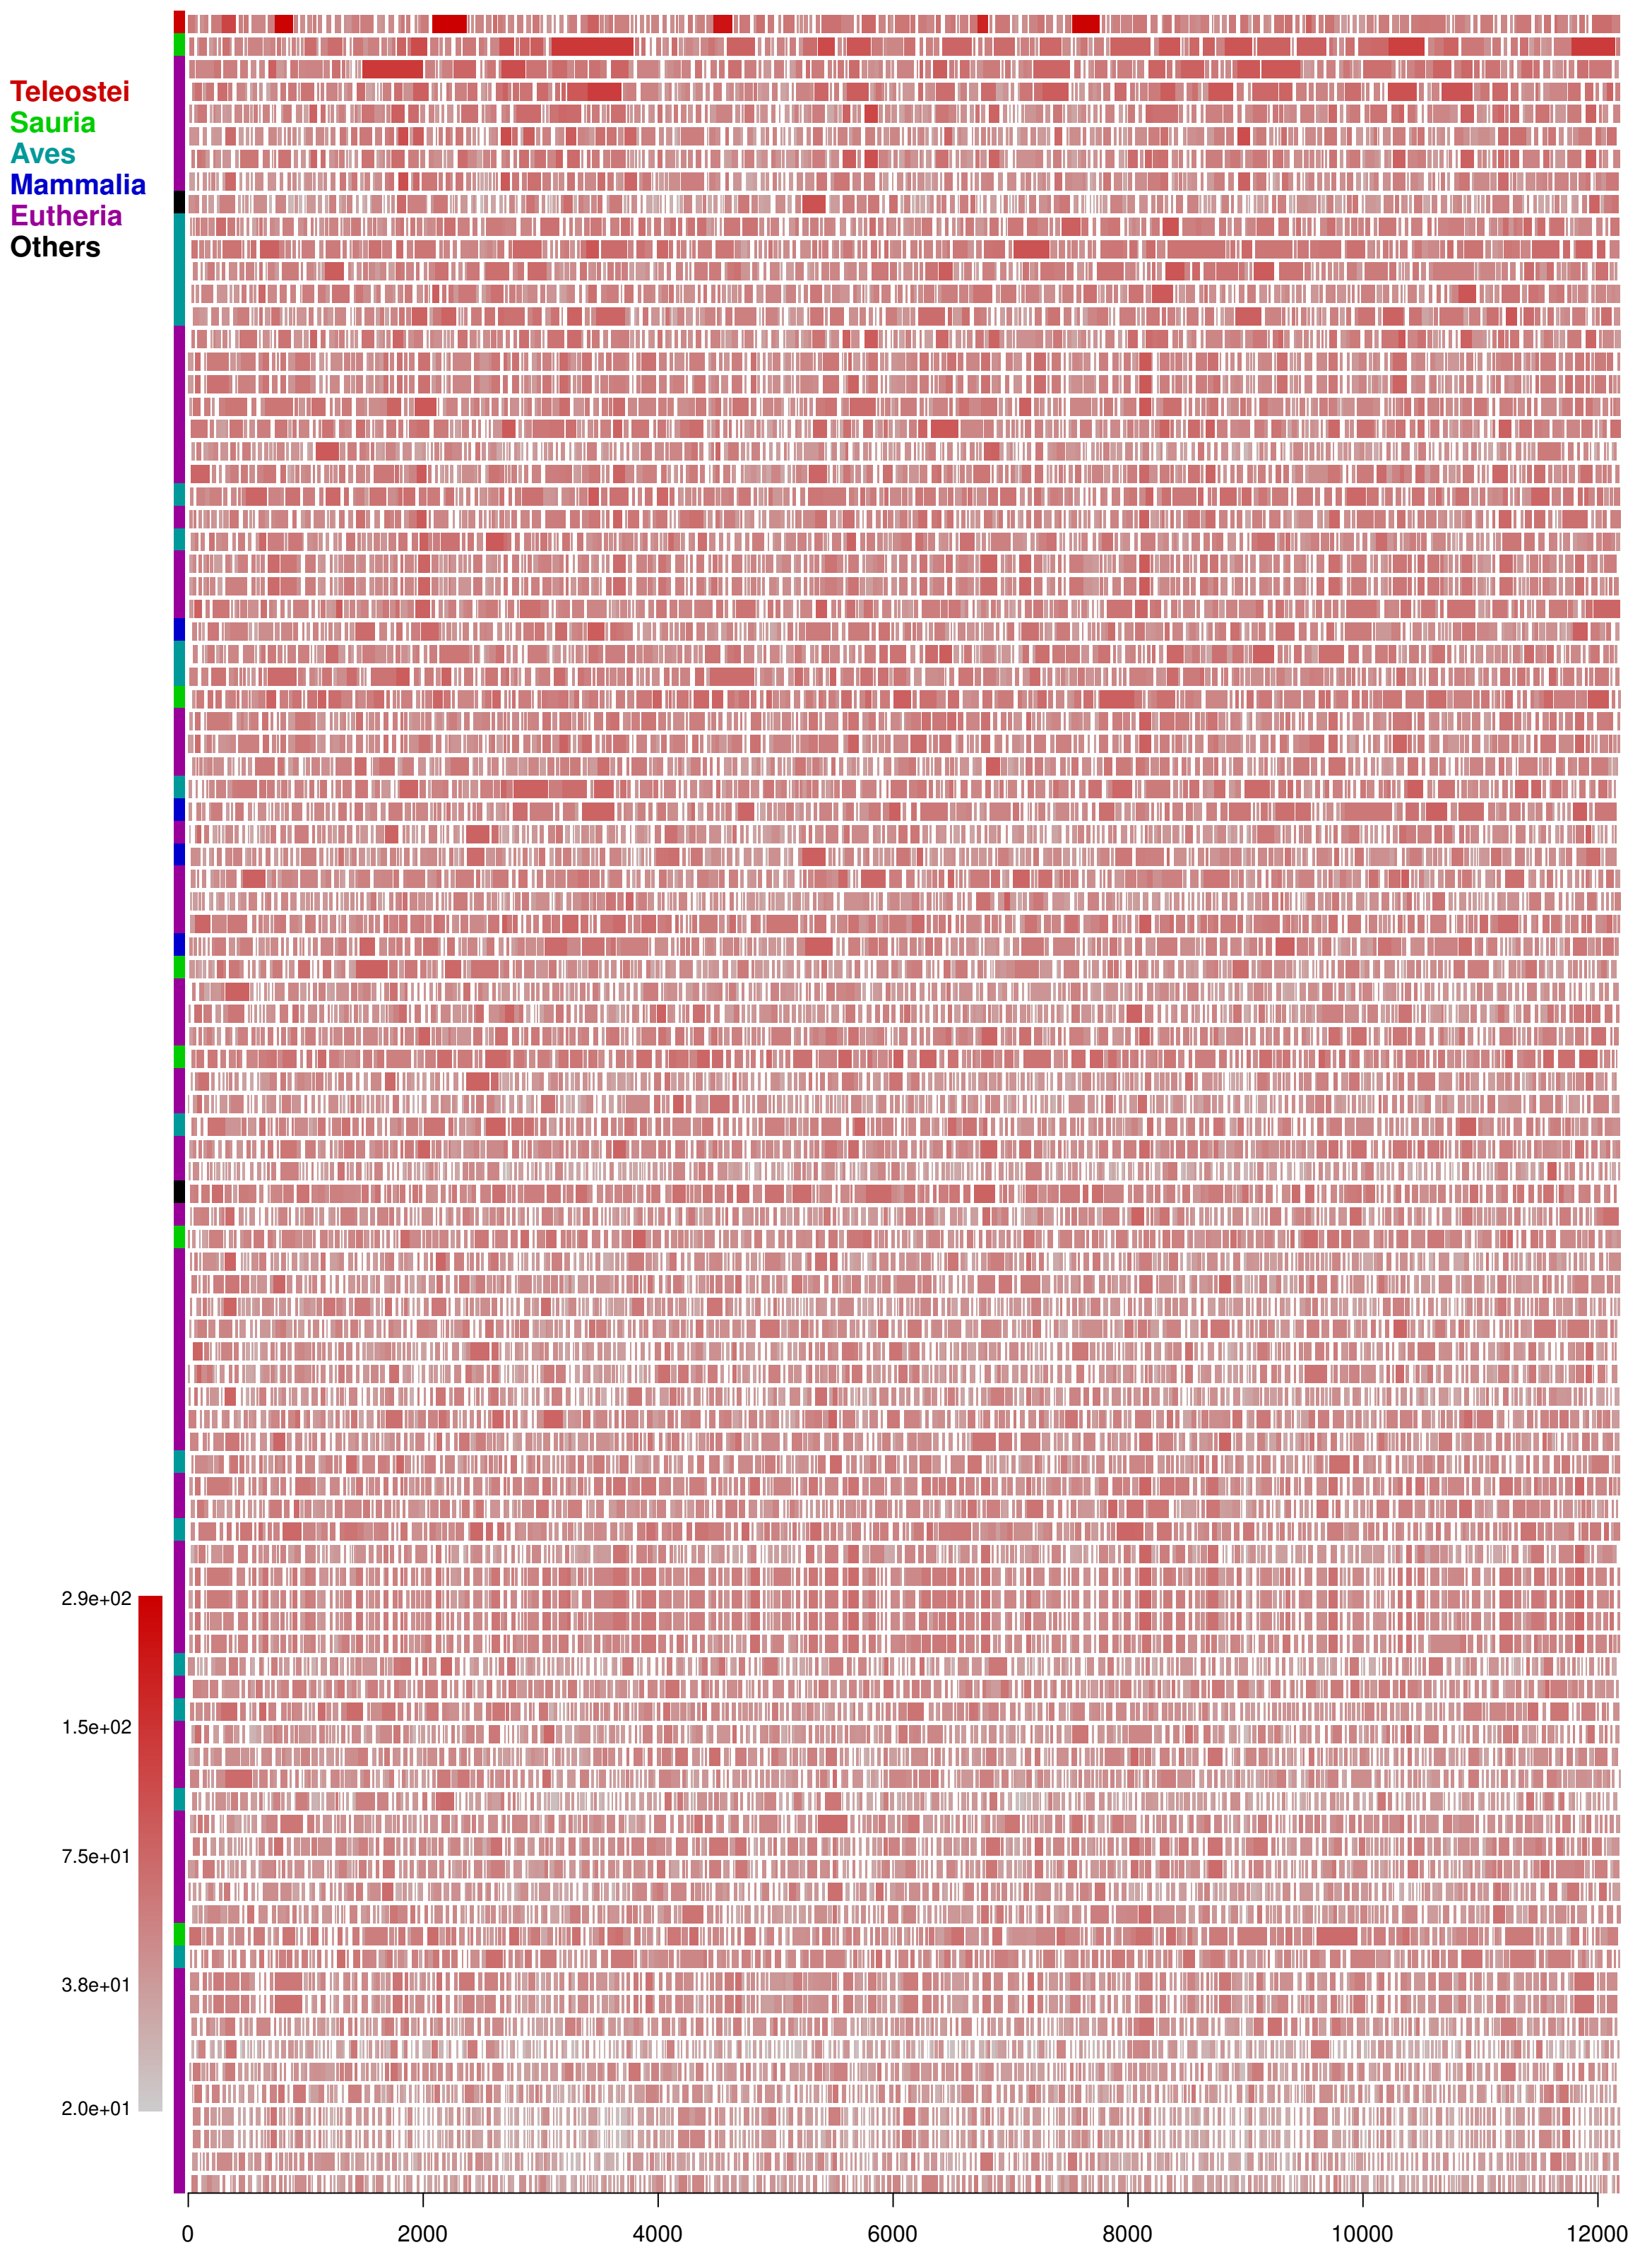

54 alignments above max size (1.0e+08)

Teleostei  
Sauria  
Aves  
Mammalia  
Eutheria  
Others

2.8e+03  
7.6e+02  
2.1e+02  
5.6e+01  
1.6e+01

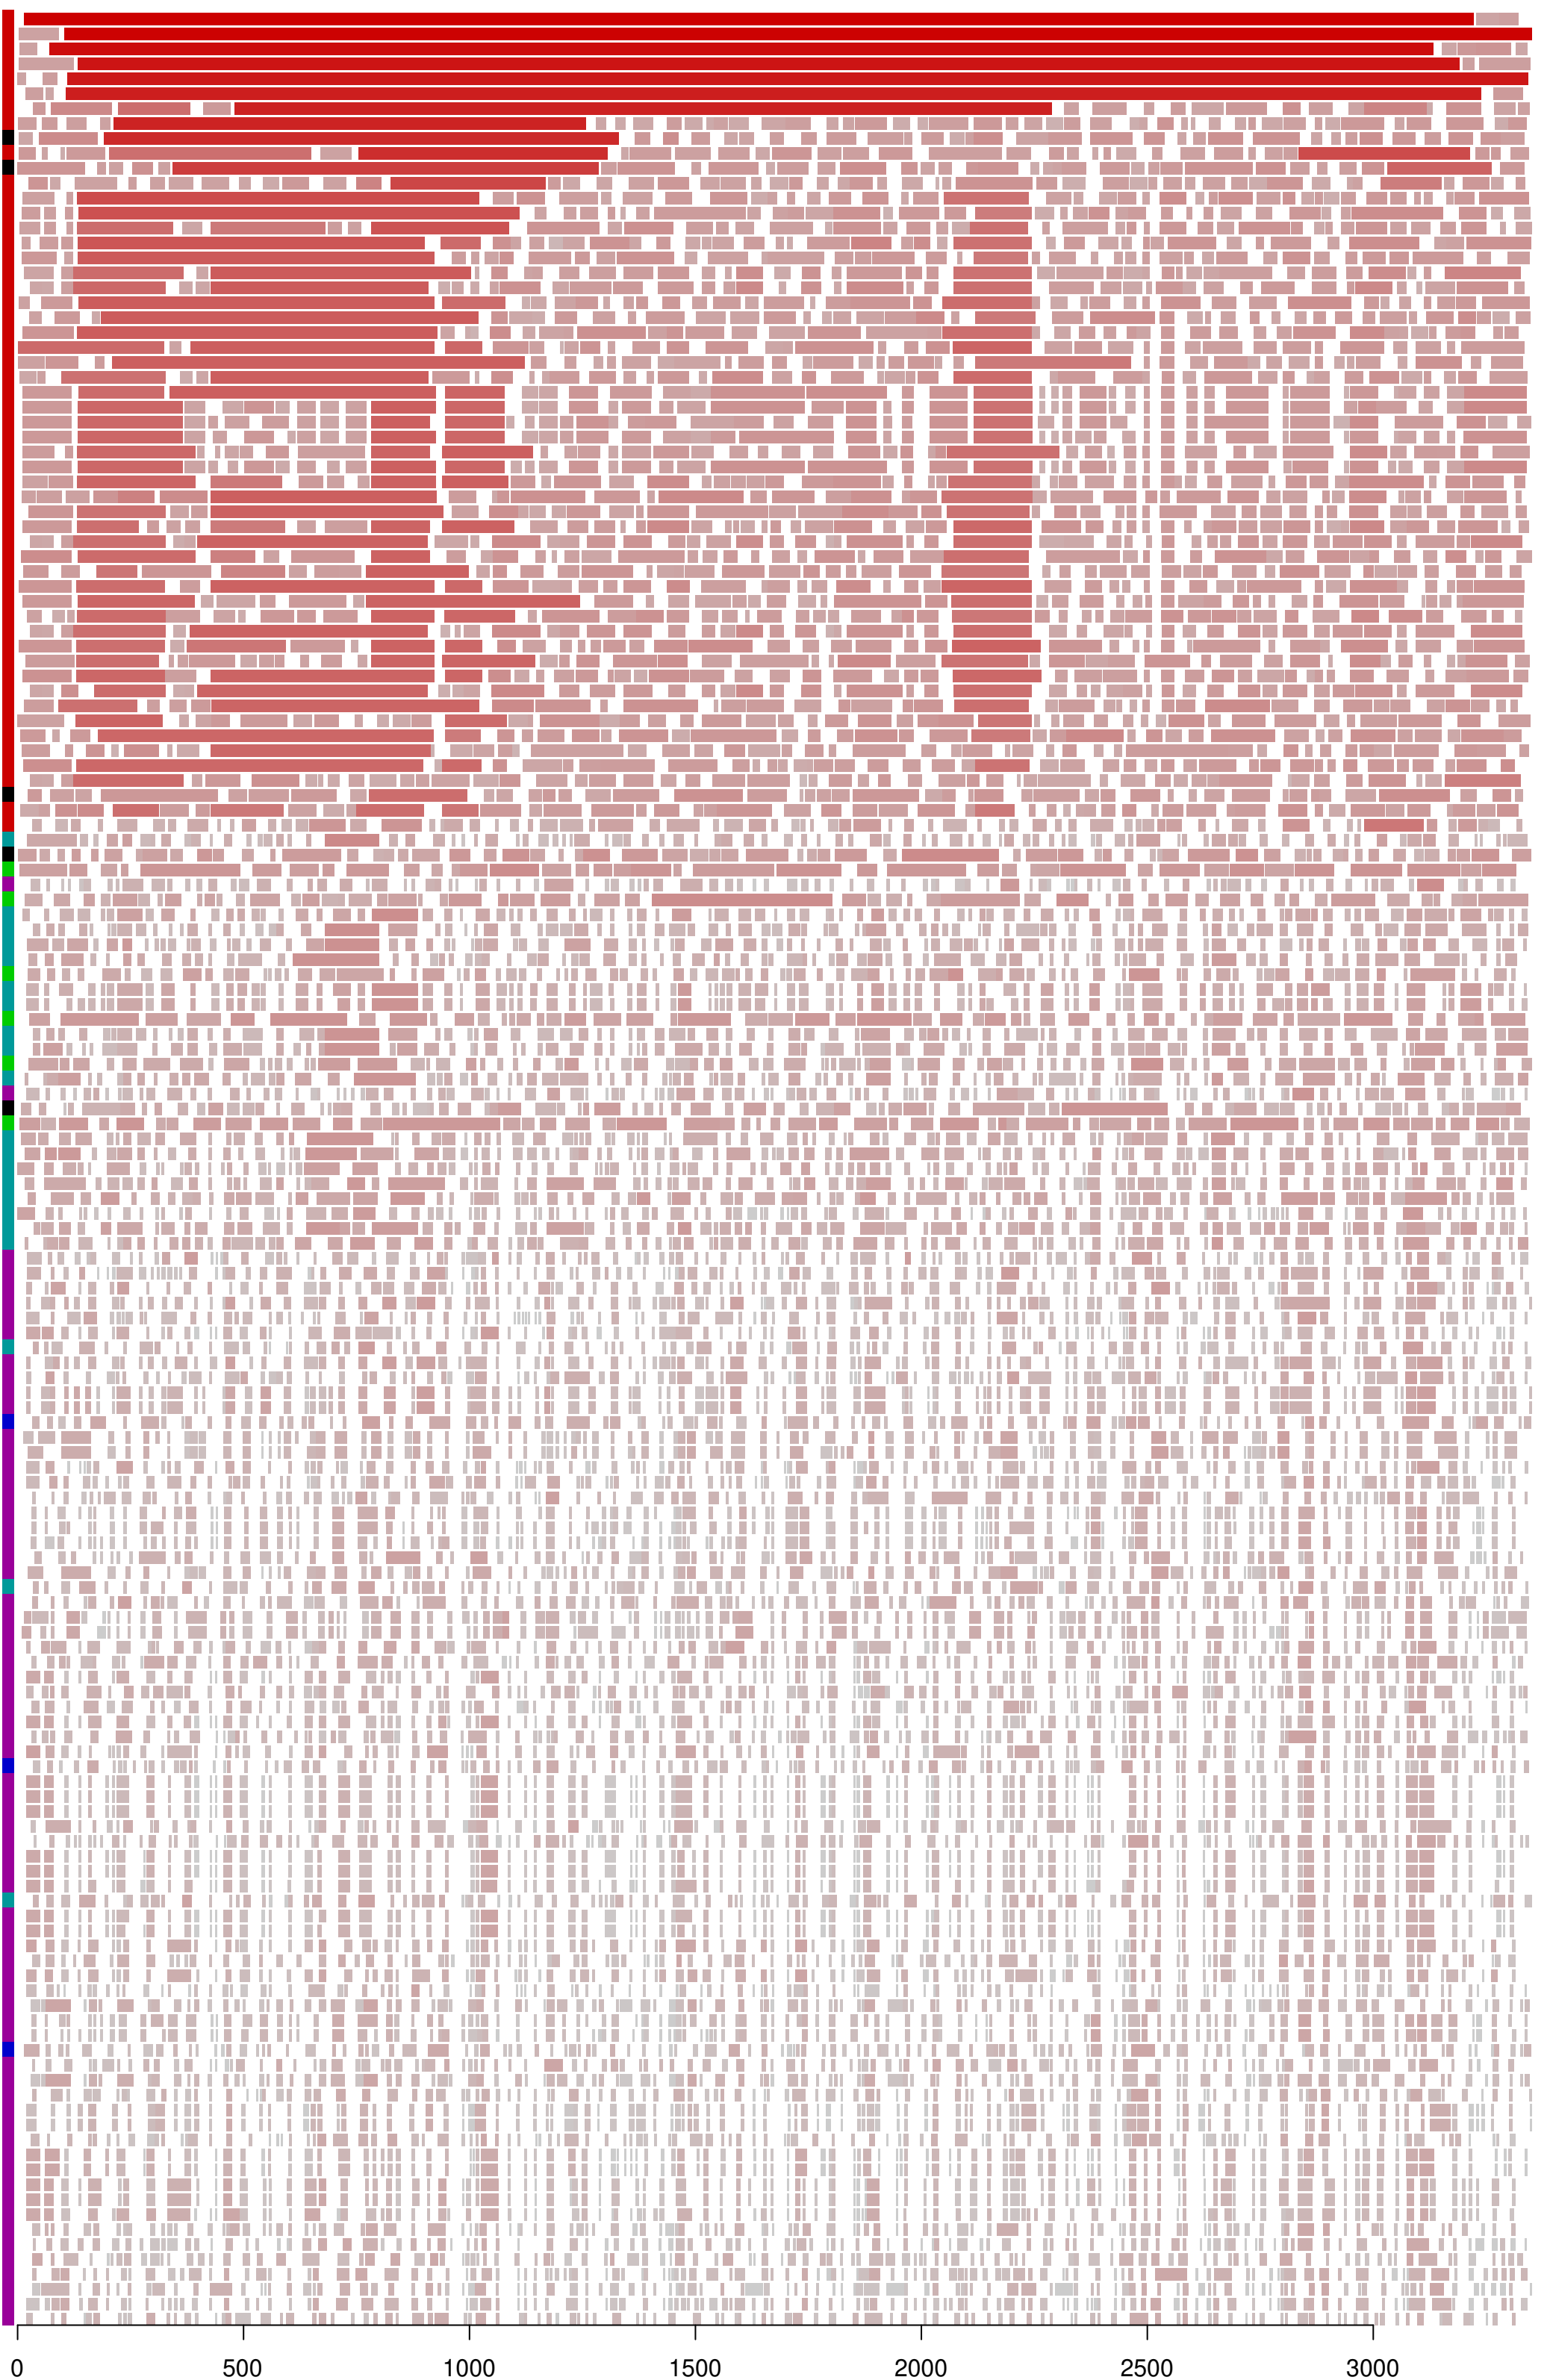

Teleostei  
Sauria  
Aves  
Mammalia  
Eutheria  
Others

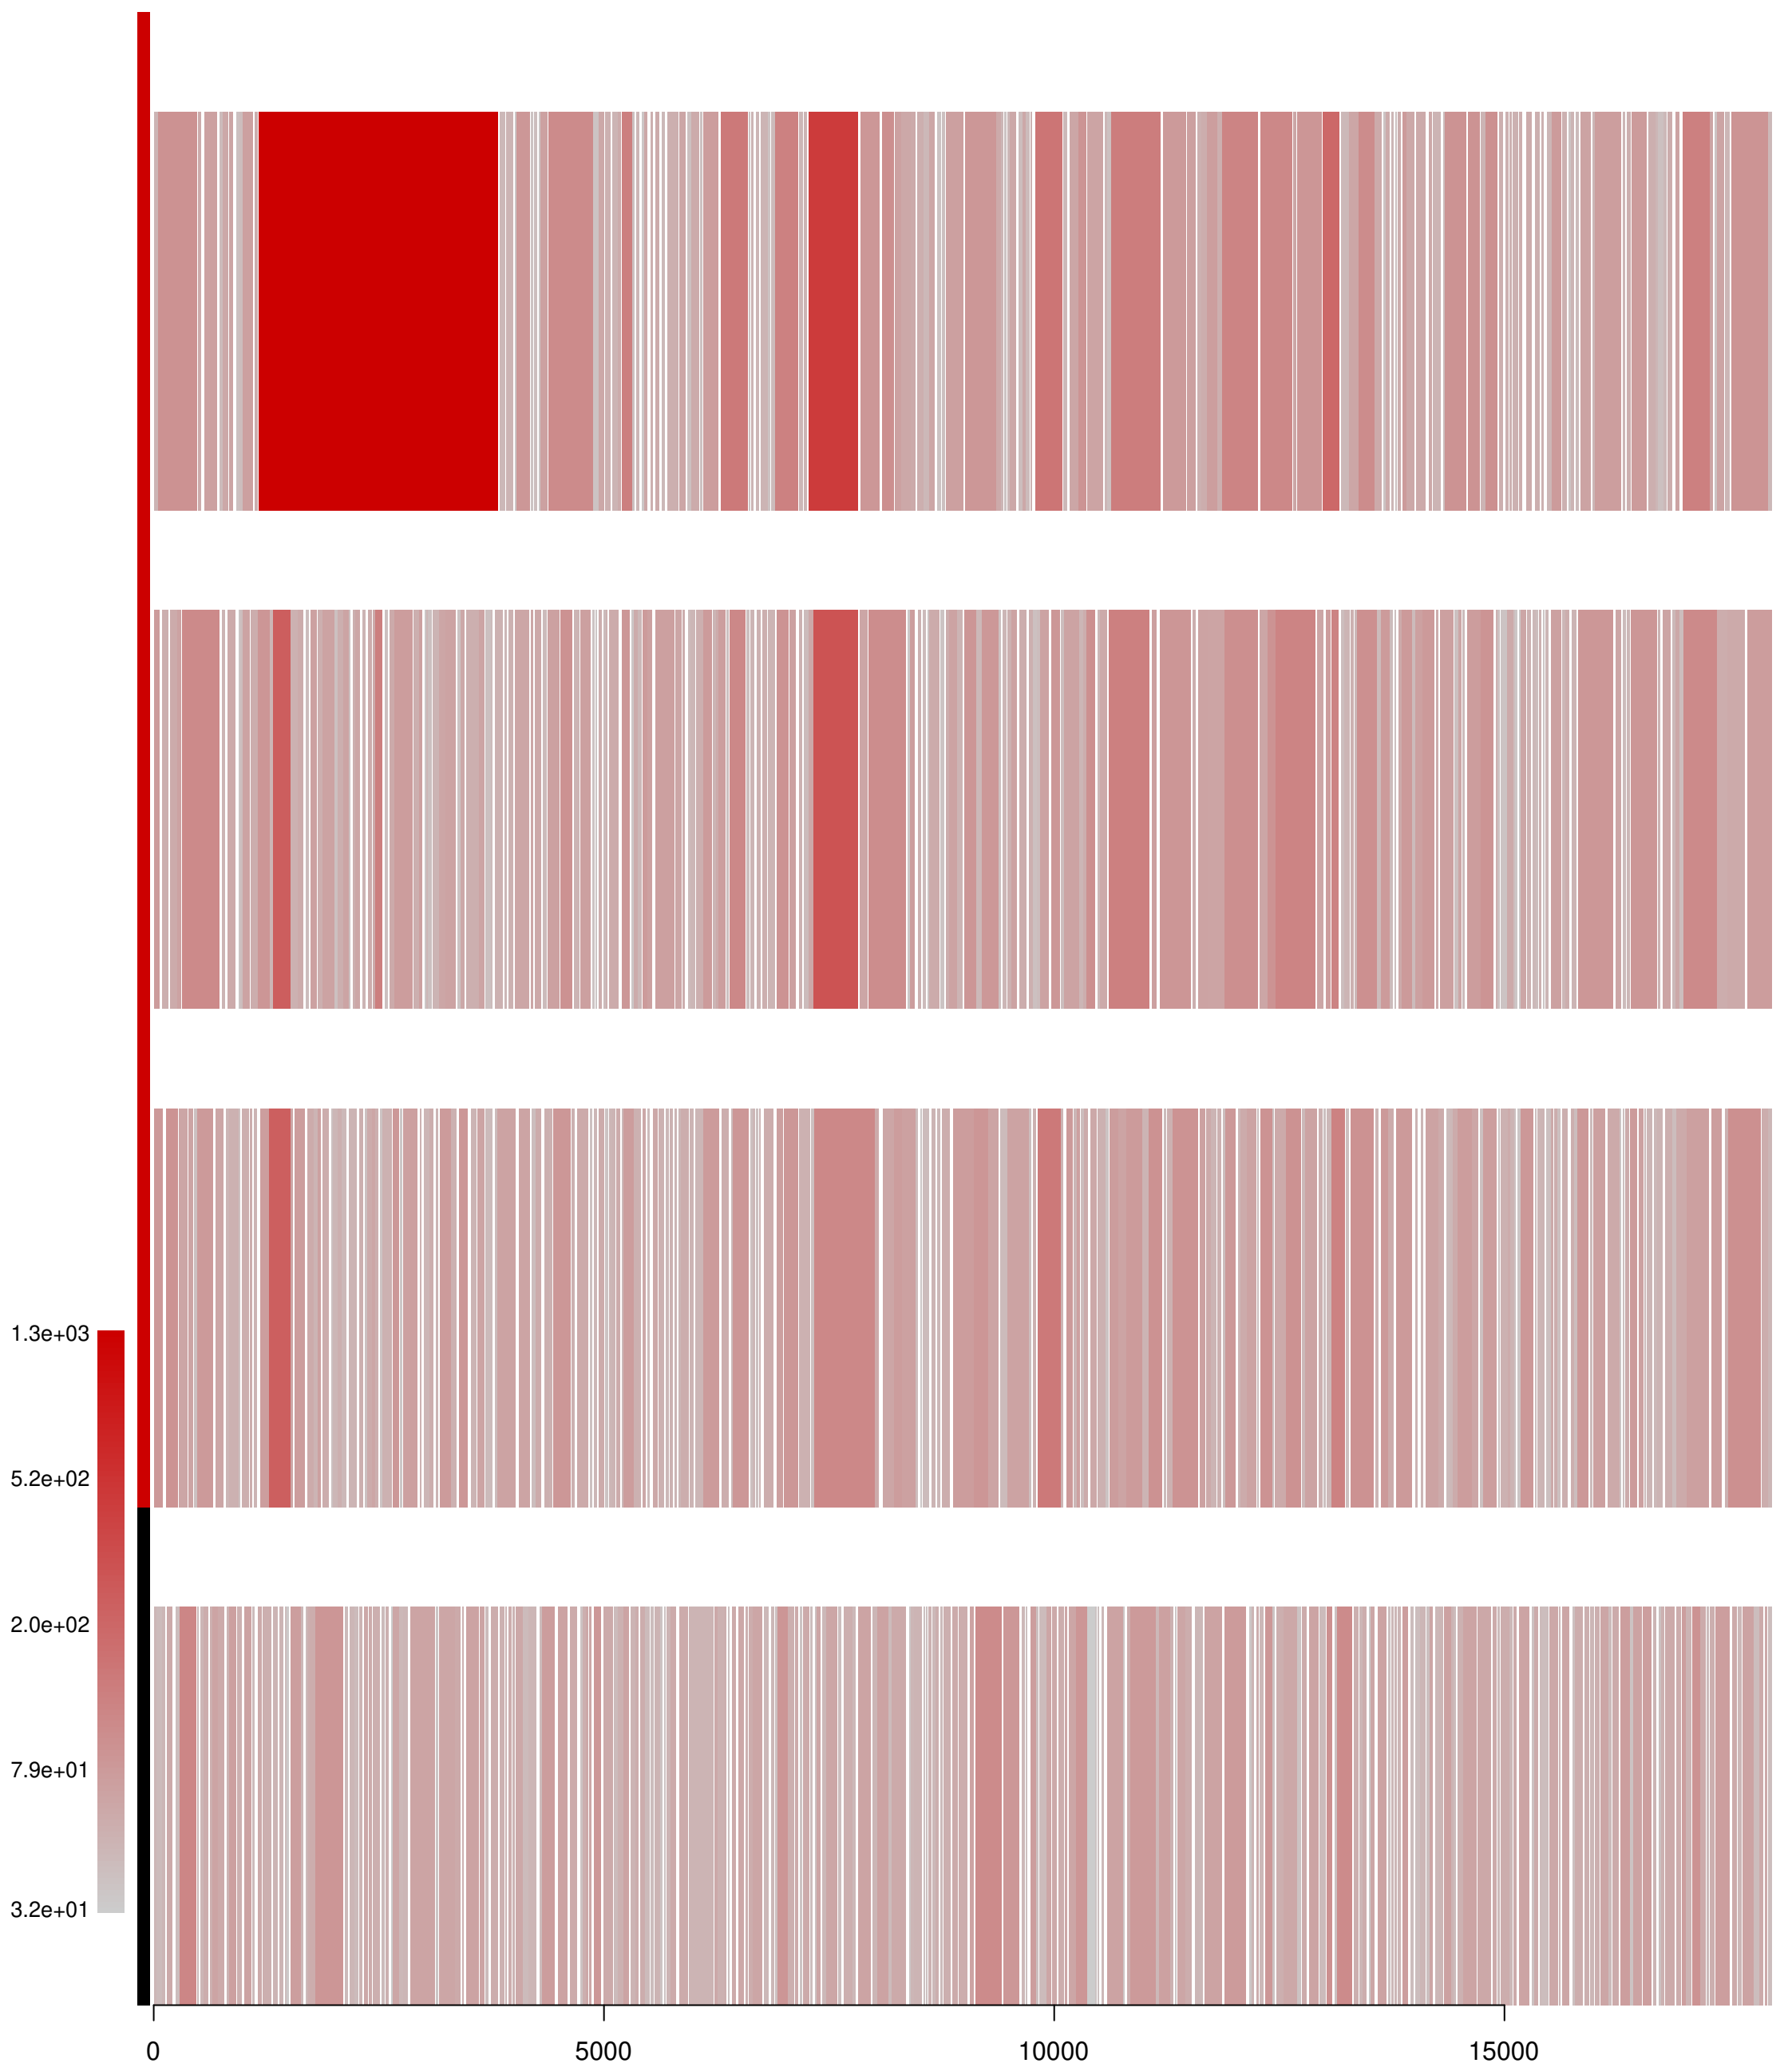

162 alignments above max size (1.0e+08)

Teleostei  
Sauria  
Aves  
Mammalia  
Eutheria  
Others

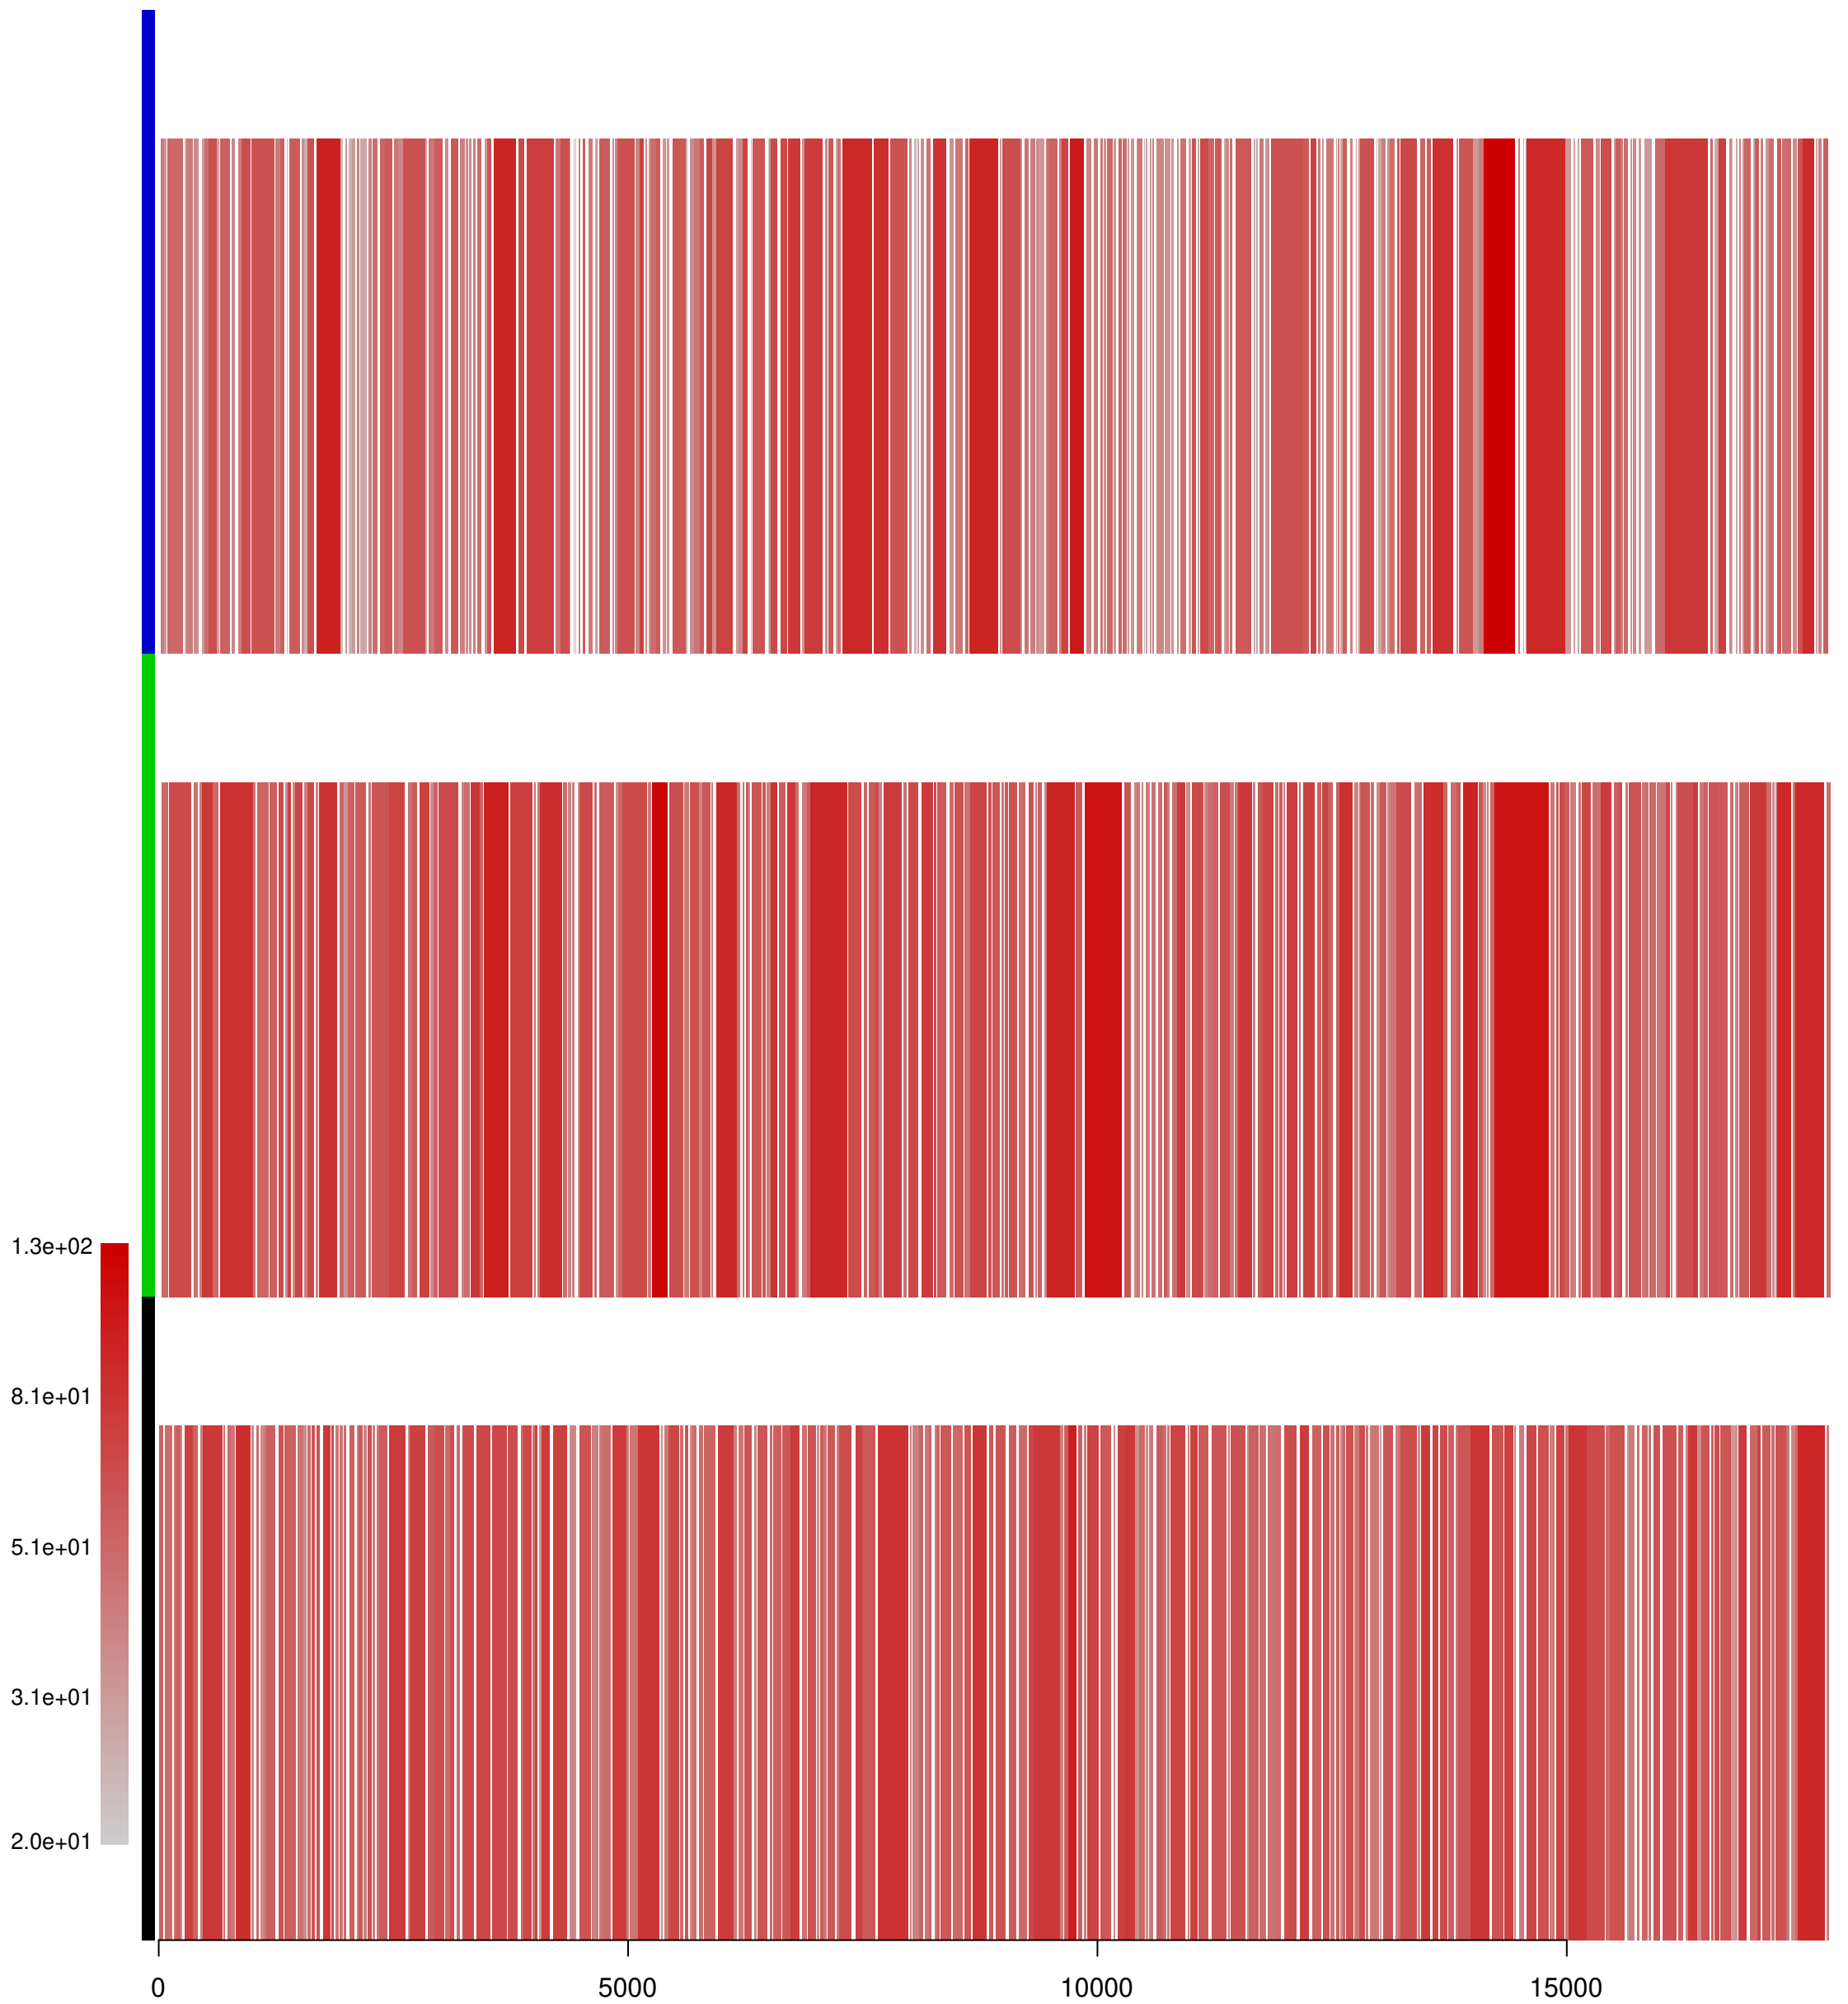

ENSDARG00000031108 : ENSDART00000177989 intron no: 36 length: 40229

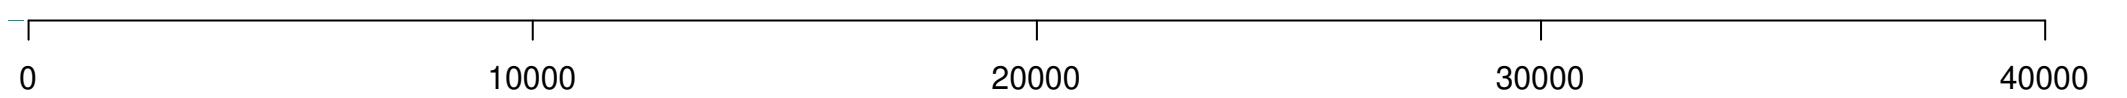

159 alignments above max size (1.0e+08)

Teleostei  
Sauria  
Aves  
Mammalia  
Eutheria  
Others

1.6e+02  
9.1e+01  
5.1e+01  
2.8e+01  
1.6e+01

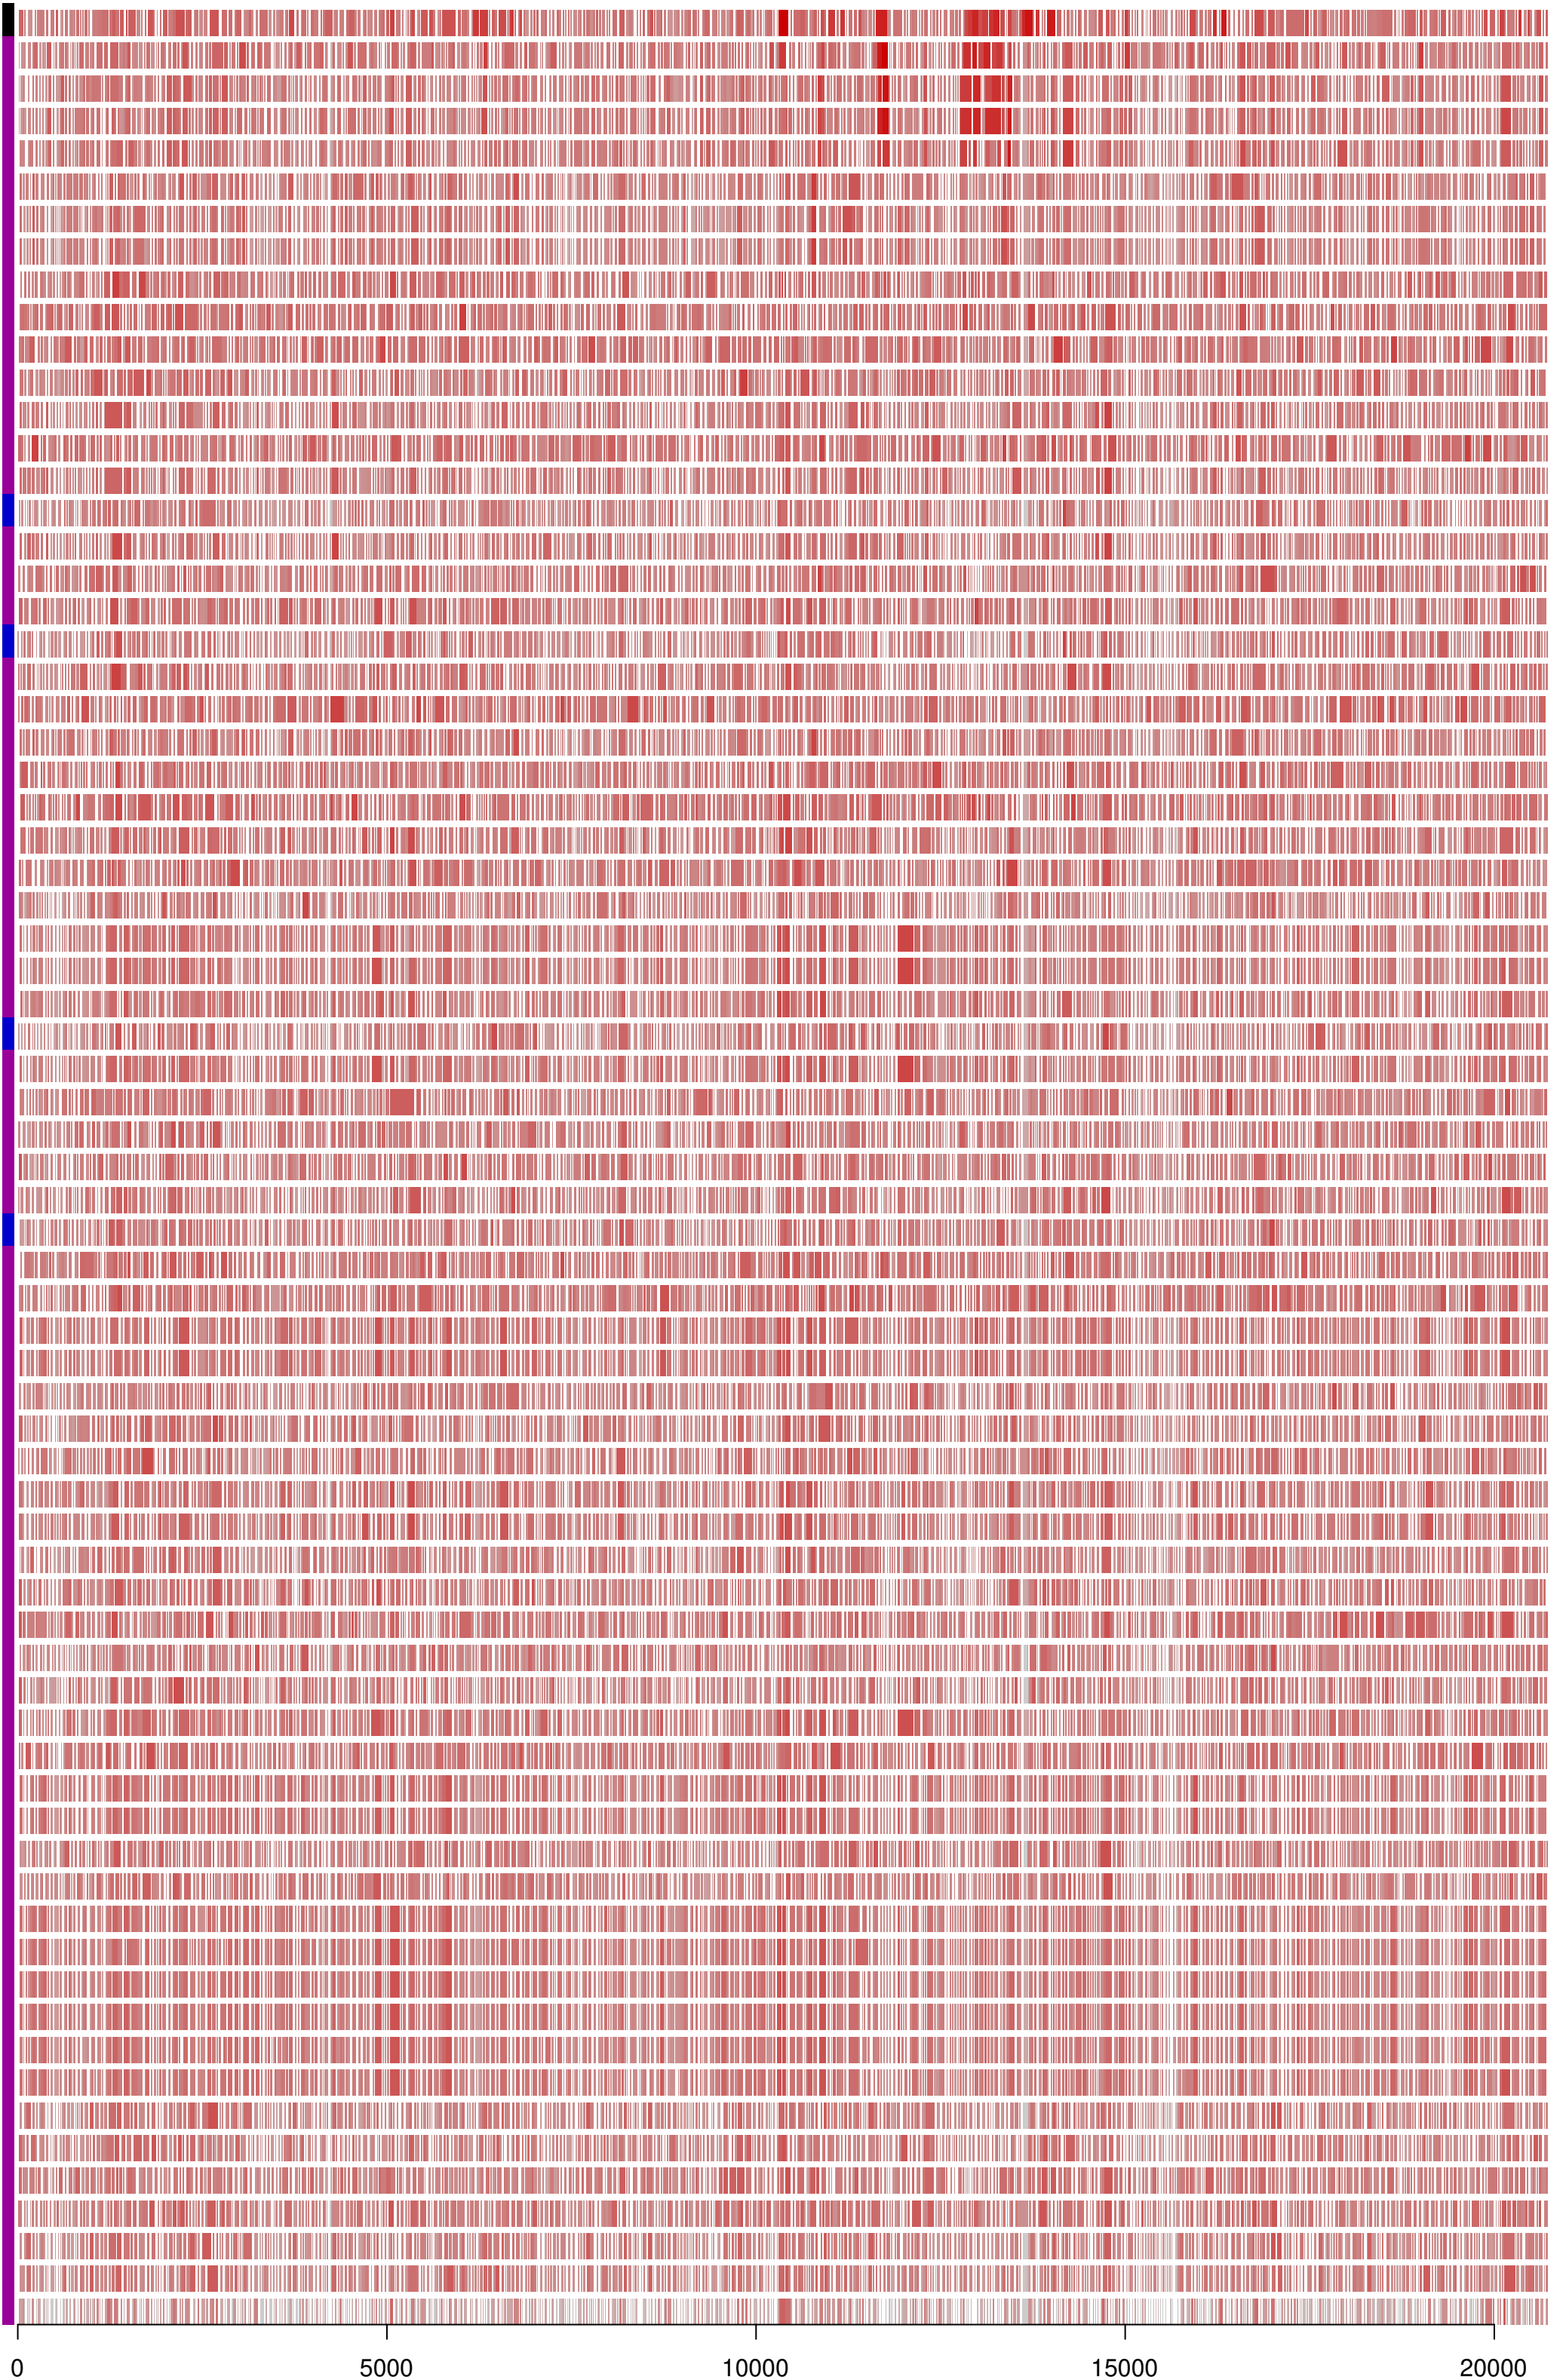

0 5000 10000 15000 20000

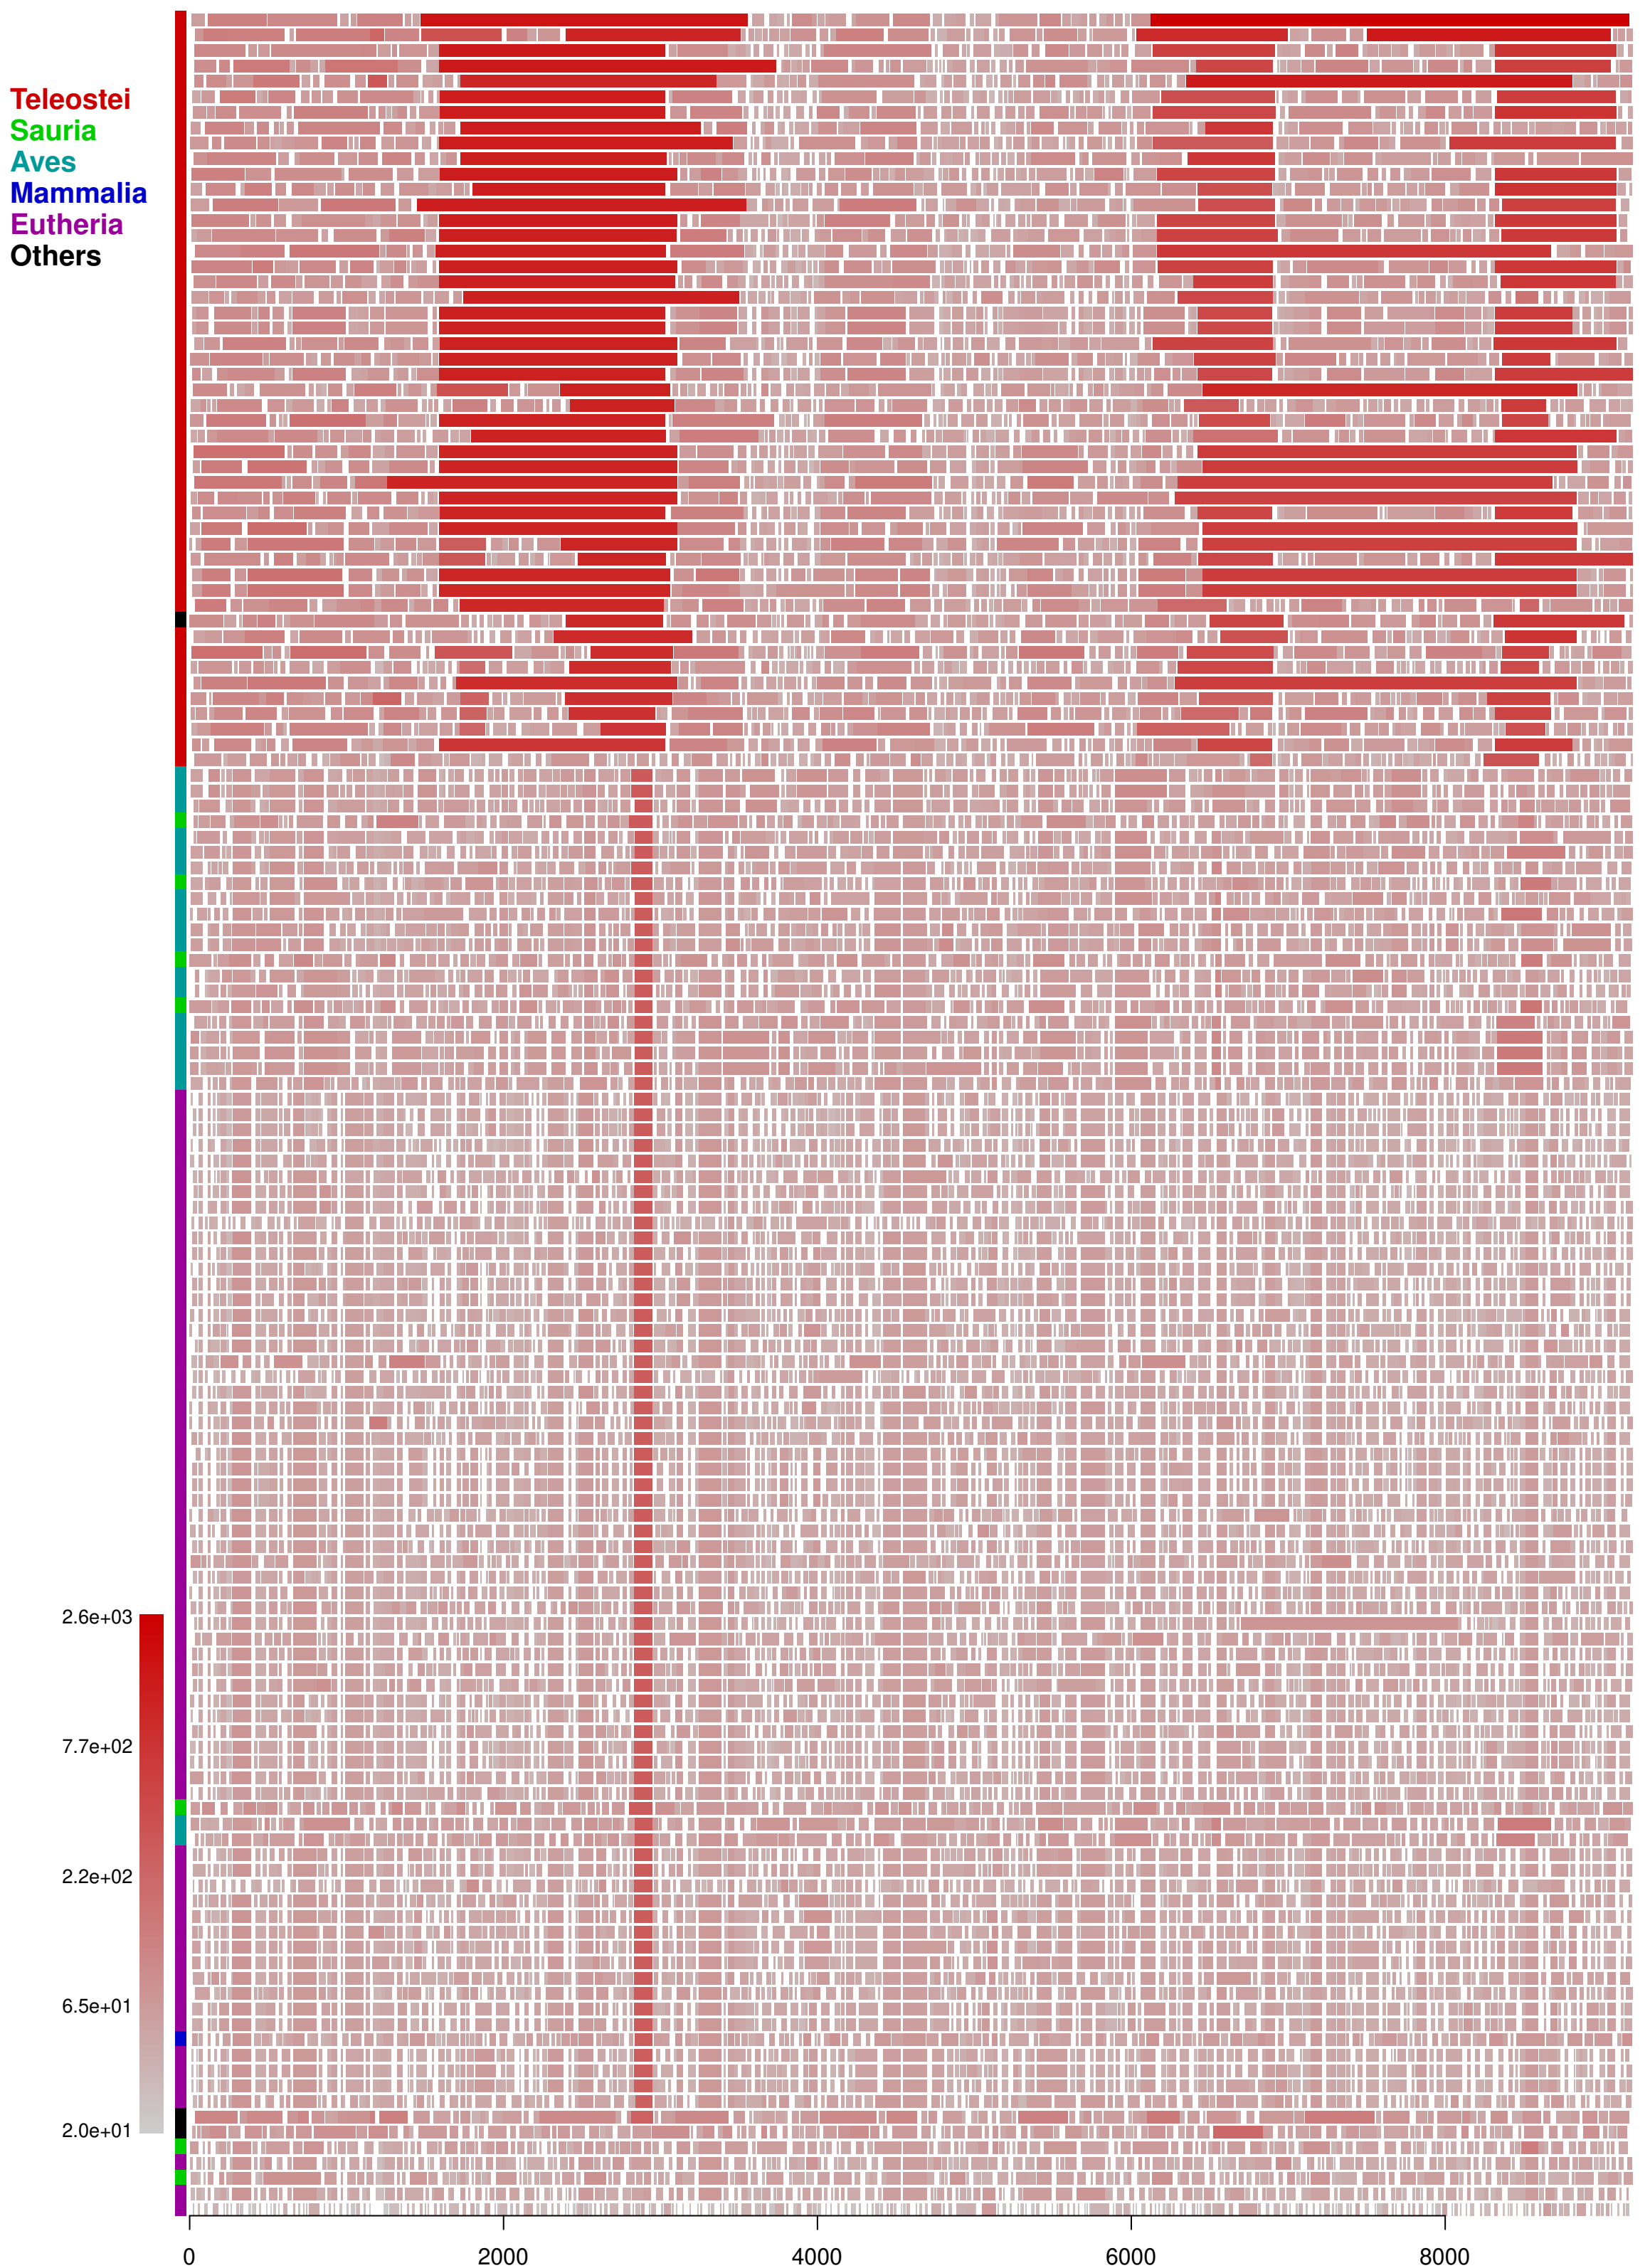



Teleostei  
Sauria  
Aves  
Mammalia  
Eutheria  
Others

1.3e+03  
4.4e+02  
1.6e+02  
5.5e+01  
2.0e+01

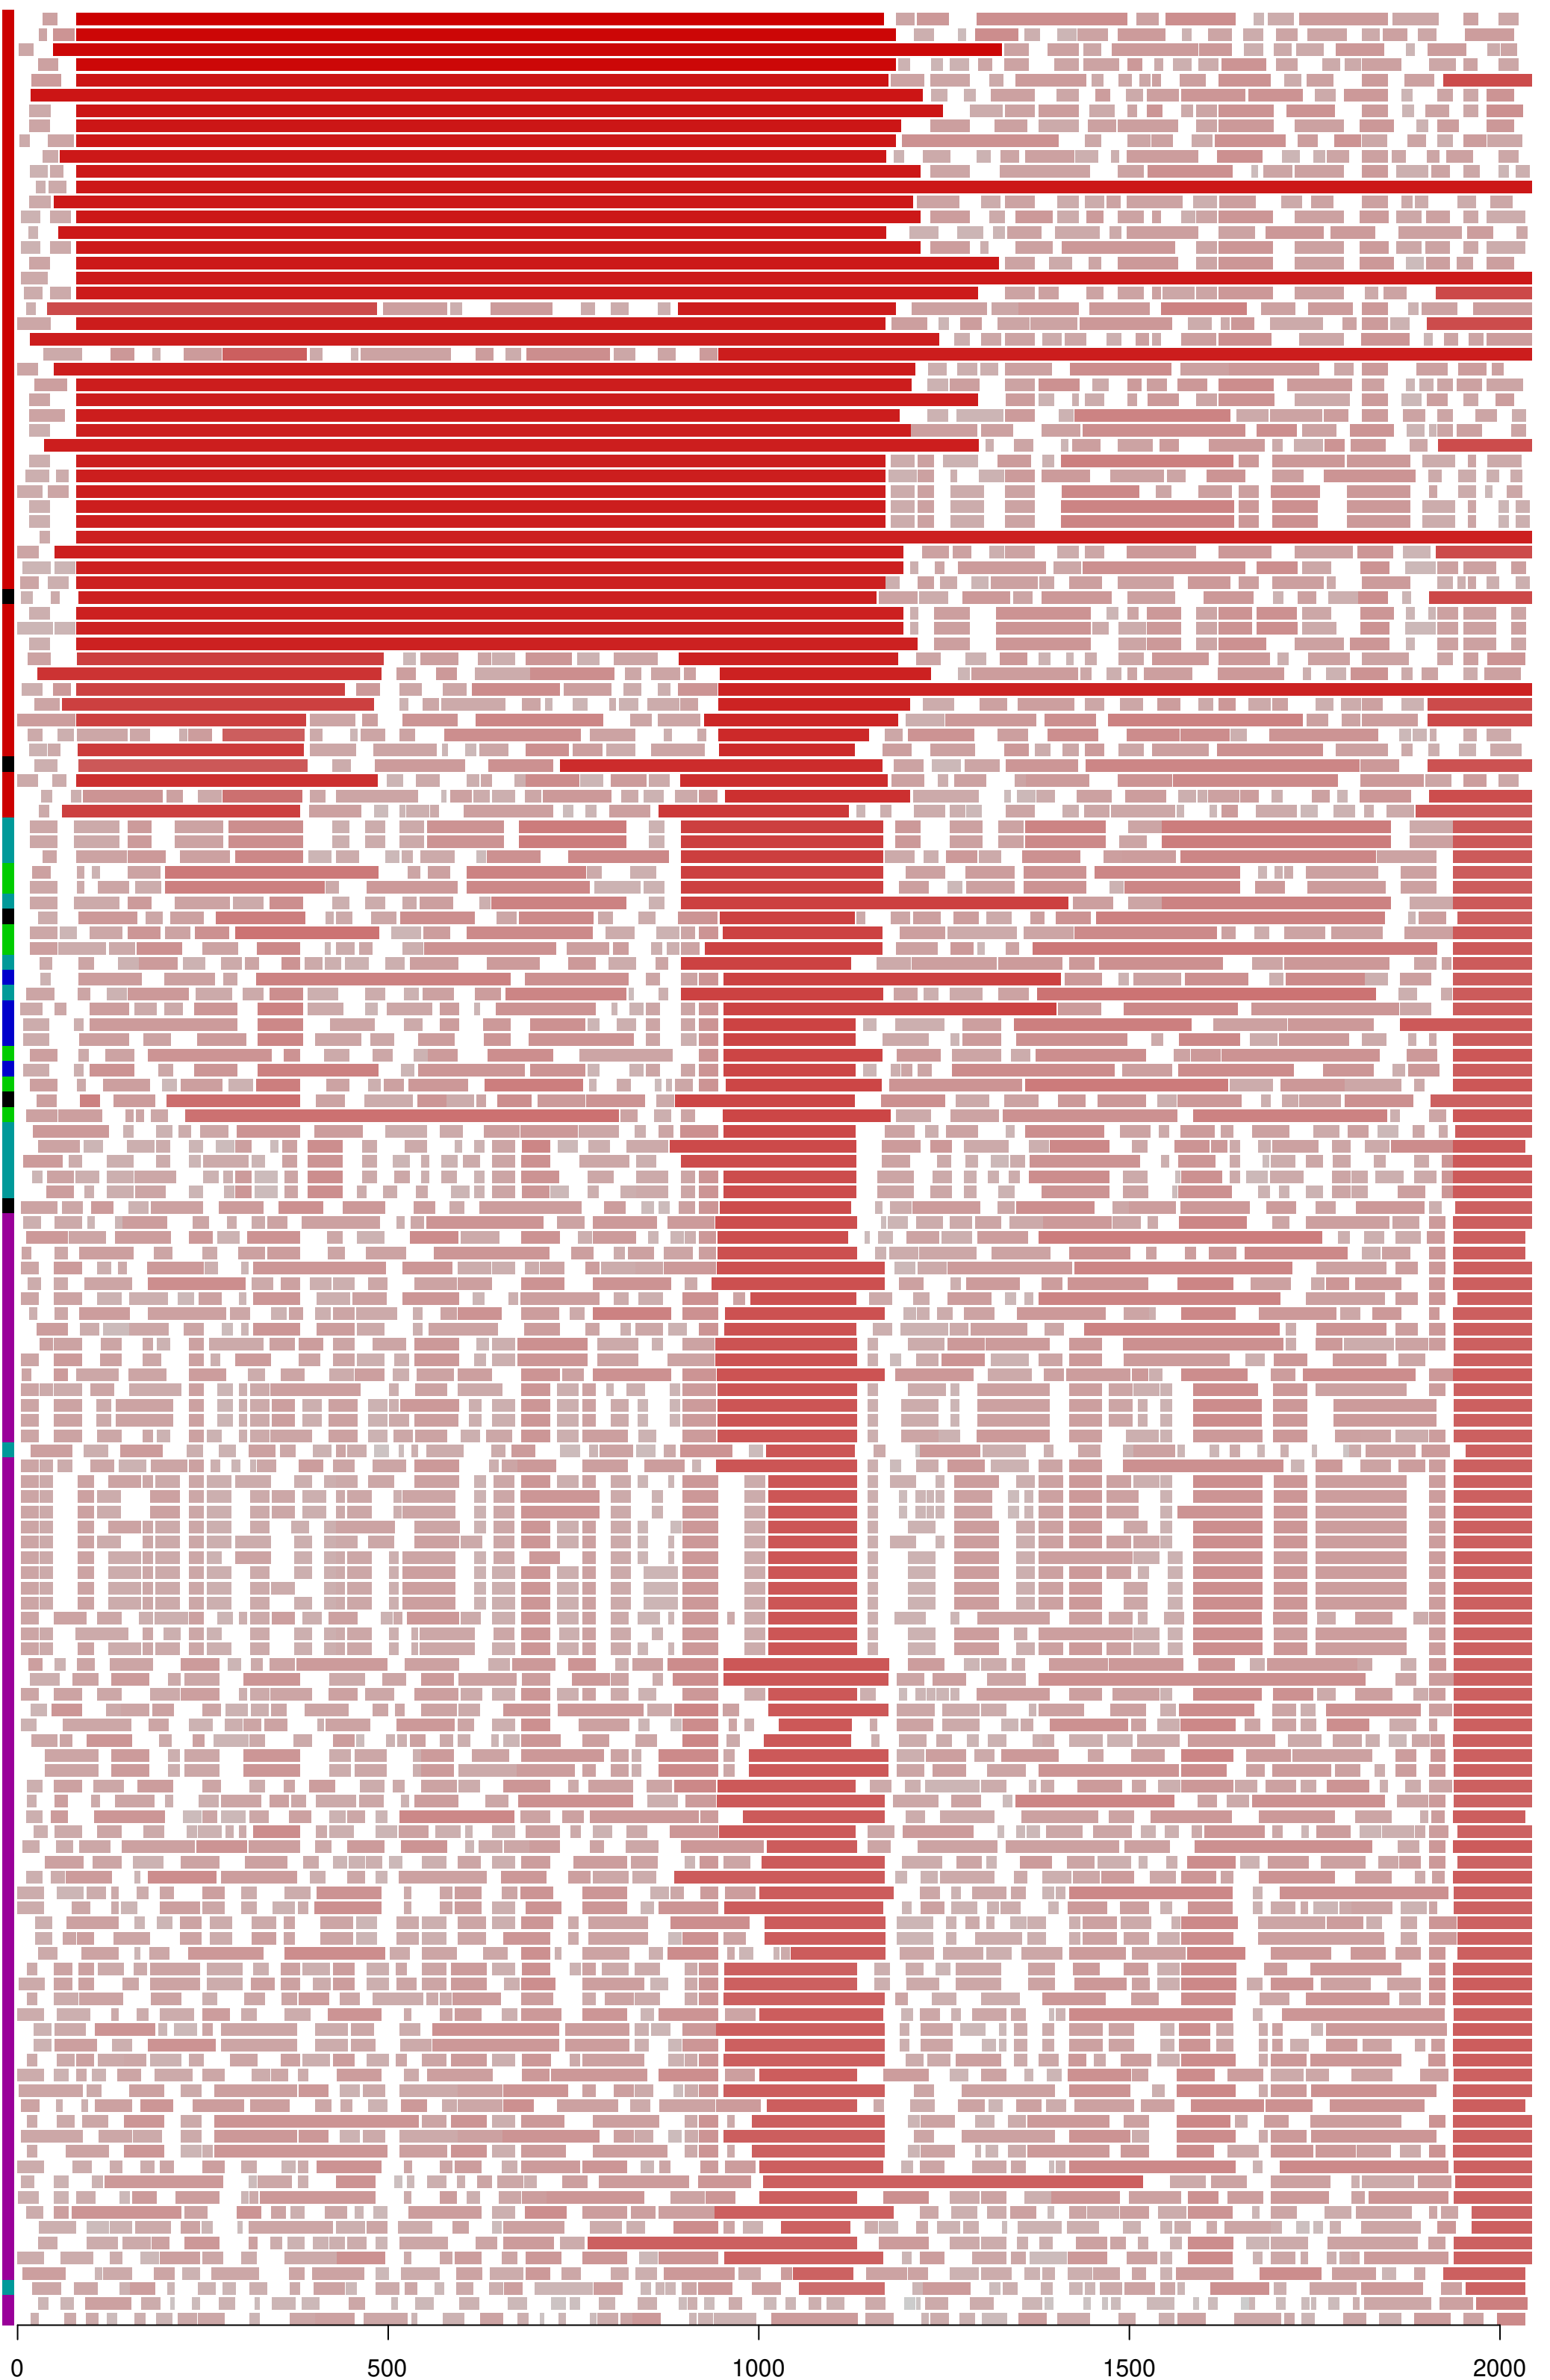

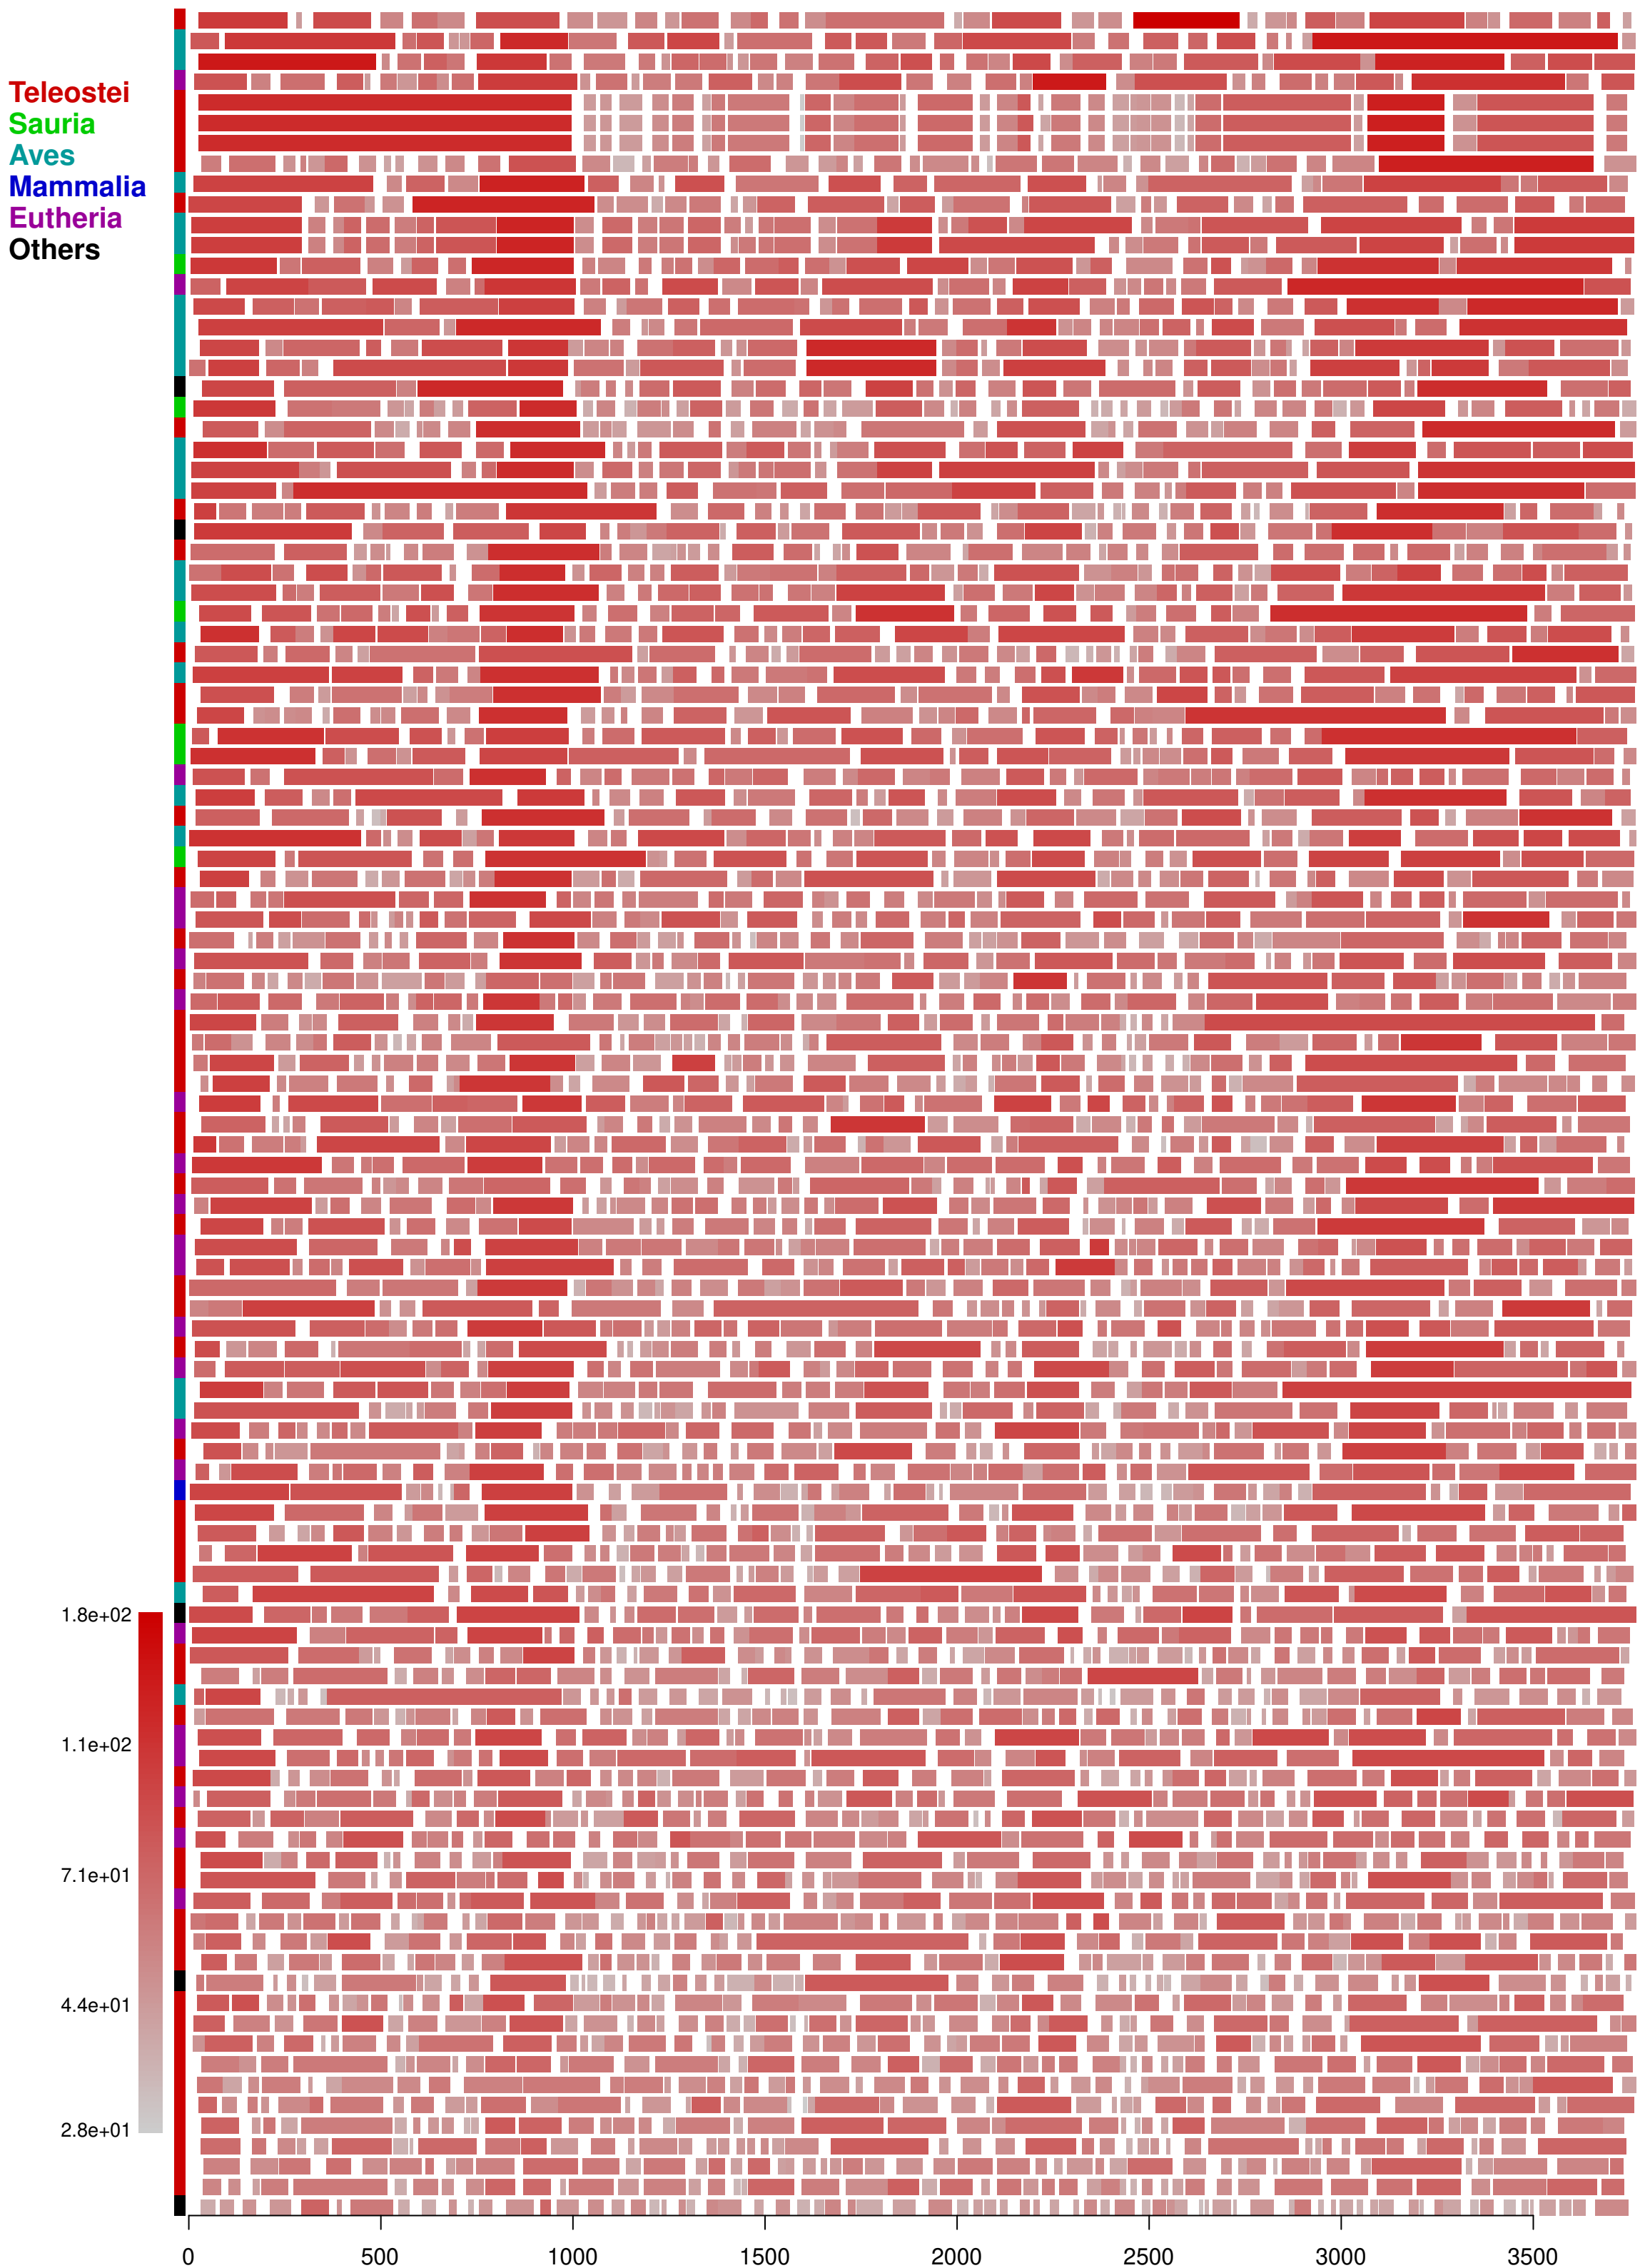

Supplement: 12864_2022_8760_MOESM4_ESM.pdf [file 12864_2022_8760_MOESM4_ESM.pdf]
