# Supplementary material for: Intron size minimisation in teleosts
Source: PubMed Central journal article supplement (PMC9438311; doi:10.1186/s12864-022-08760-w), 2022-09-01
Supplement: 12864_2022_8760_MOESM5_ESM.pdf [file 12864_2022_8760_MOESM5_ESM.pdf]

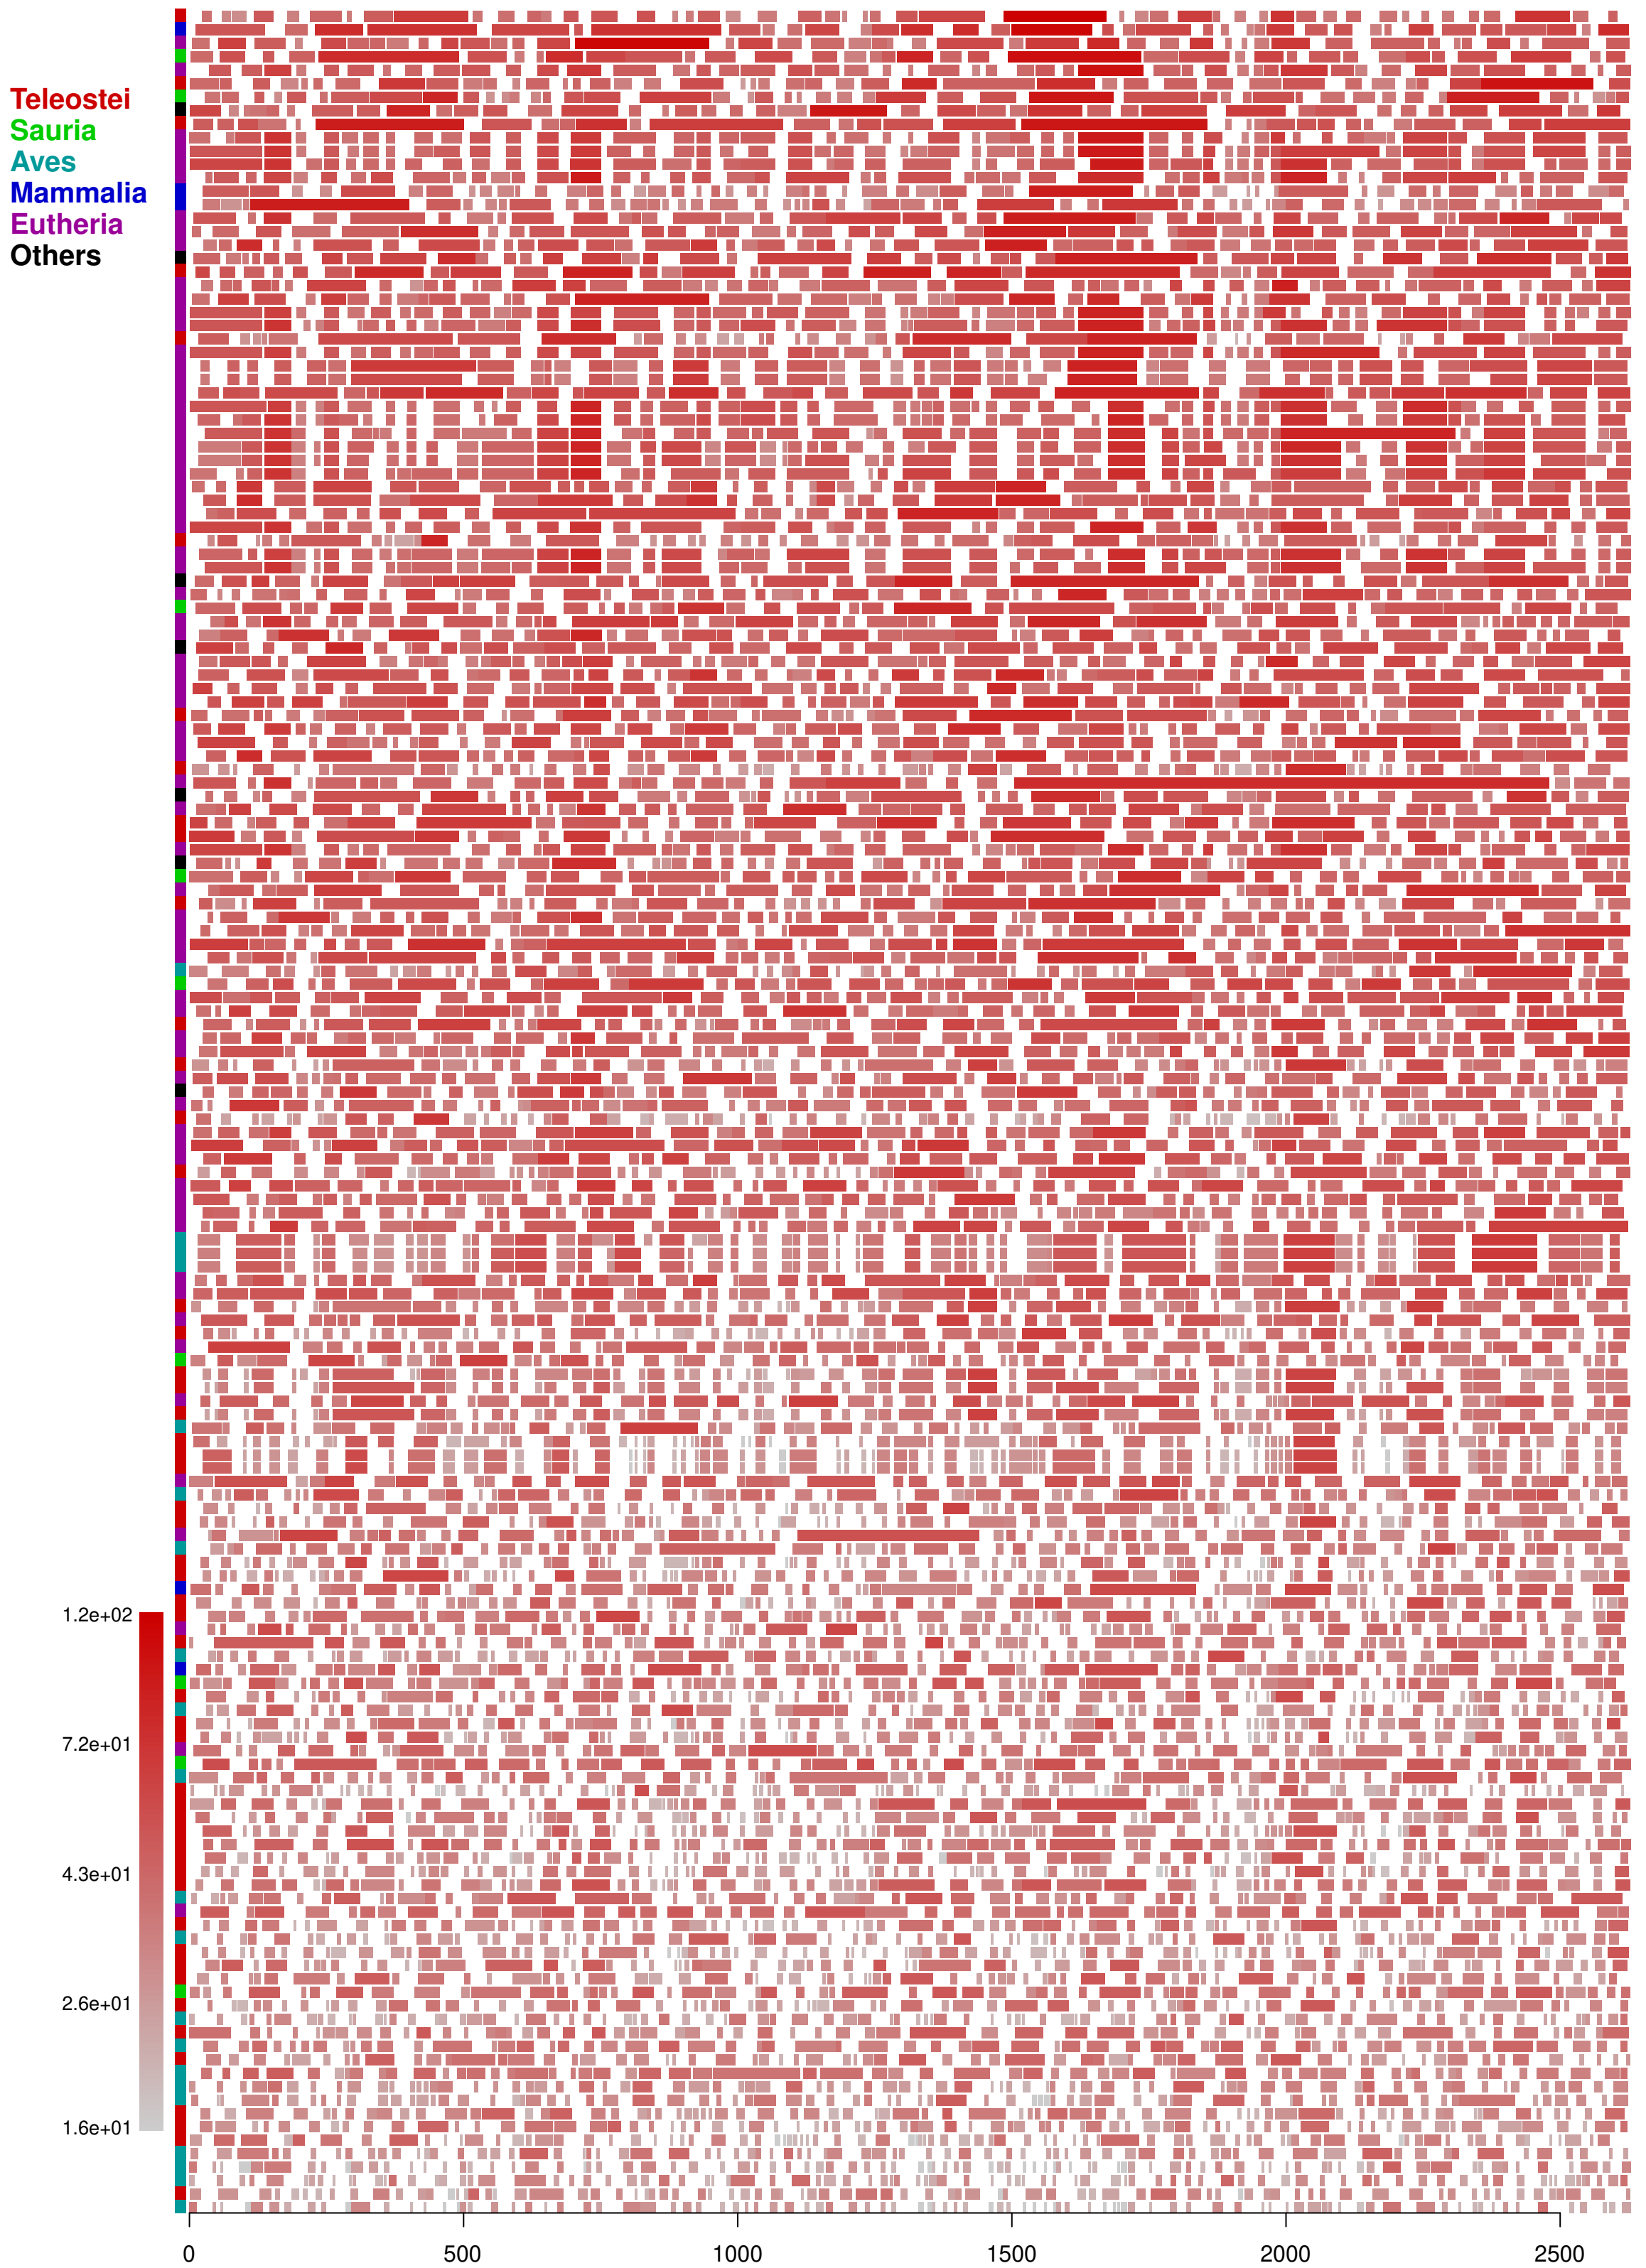

0 alignments above max size (1.0e+08)

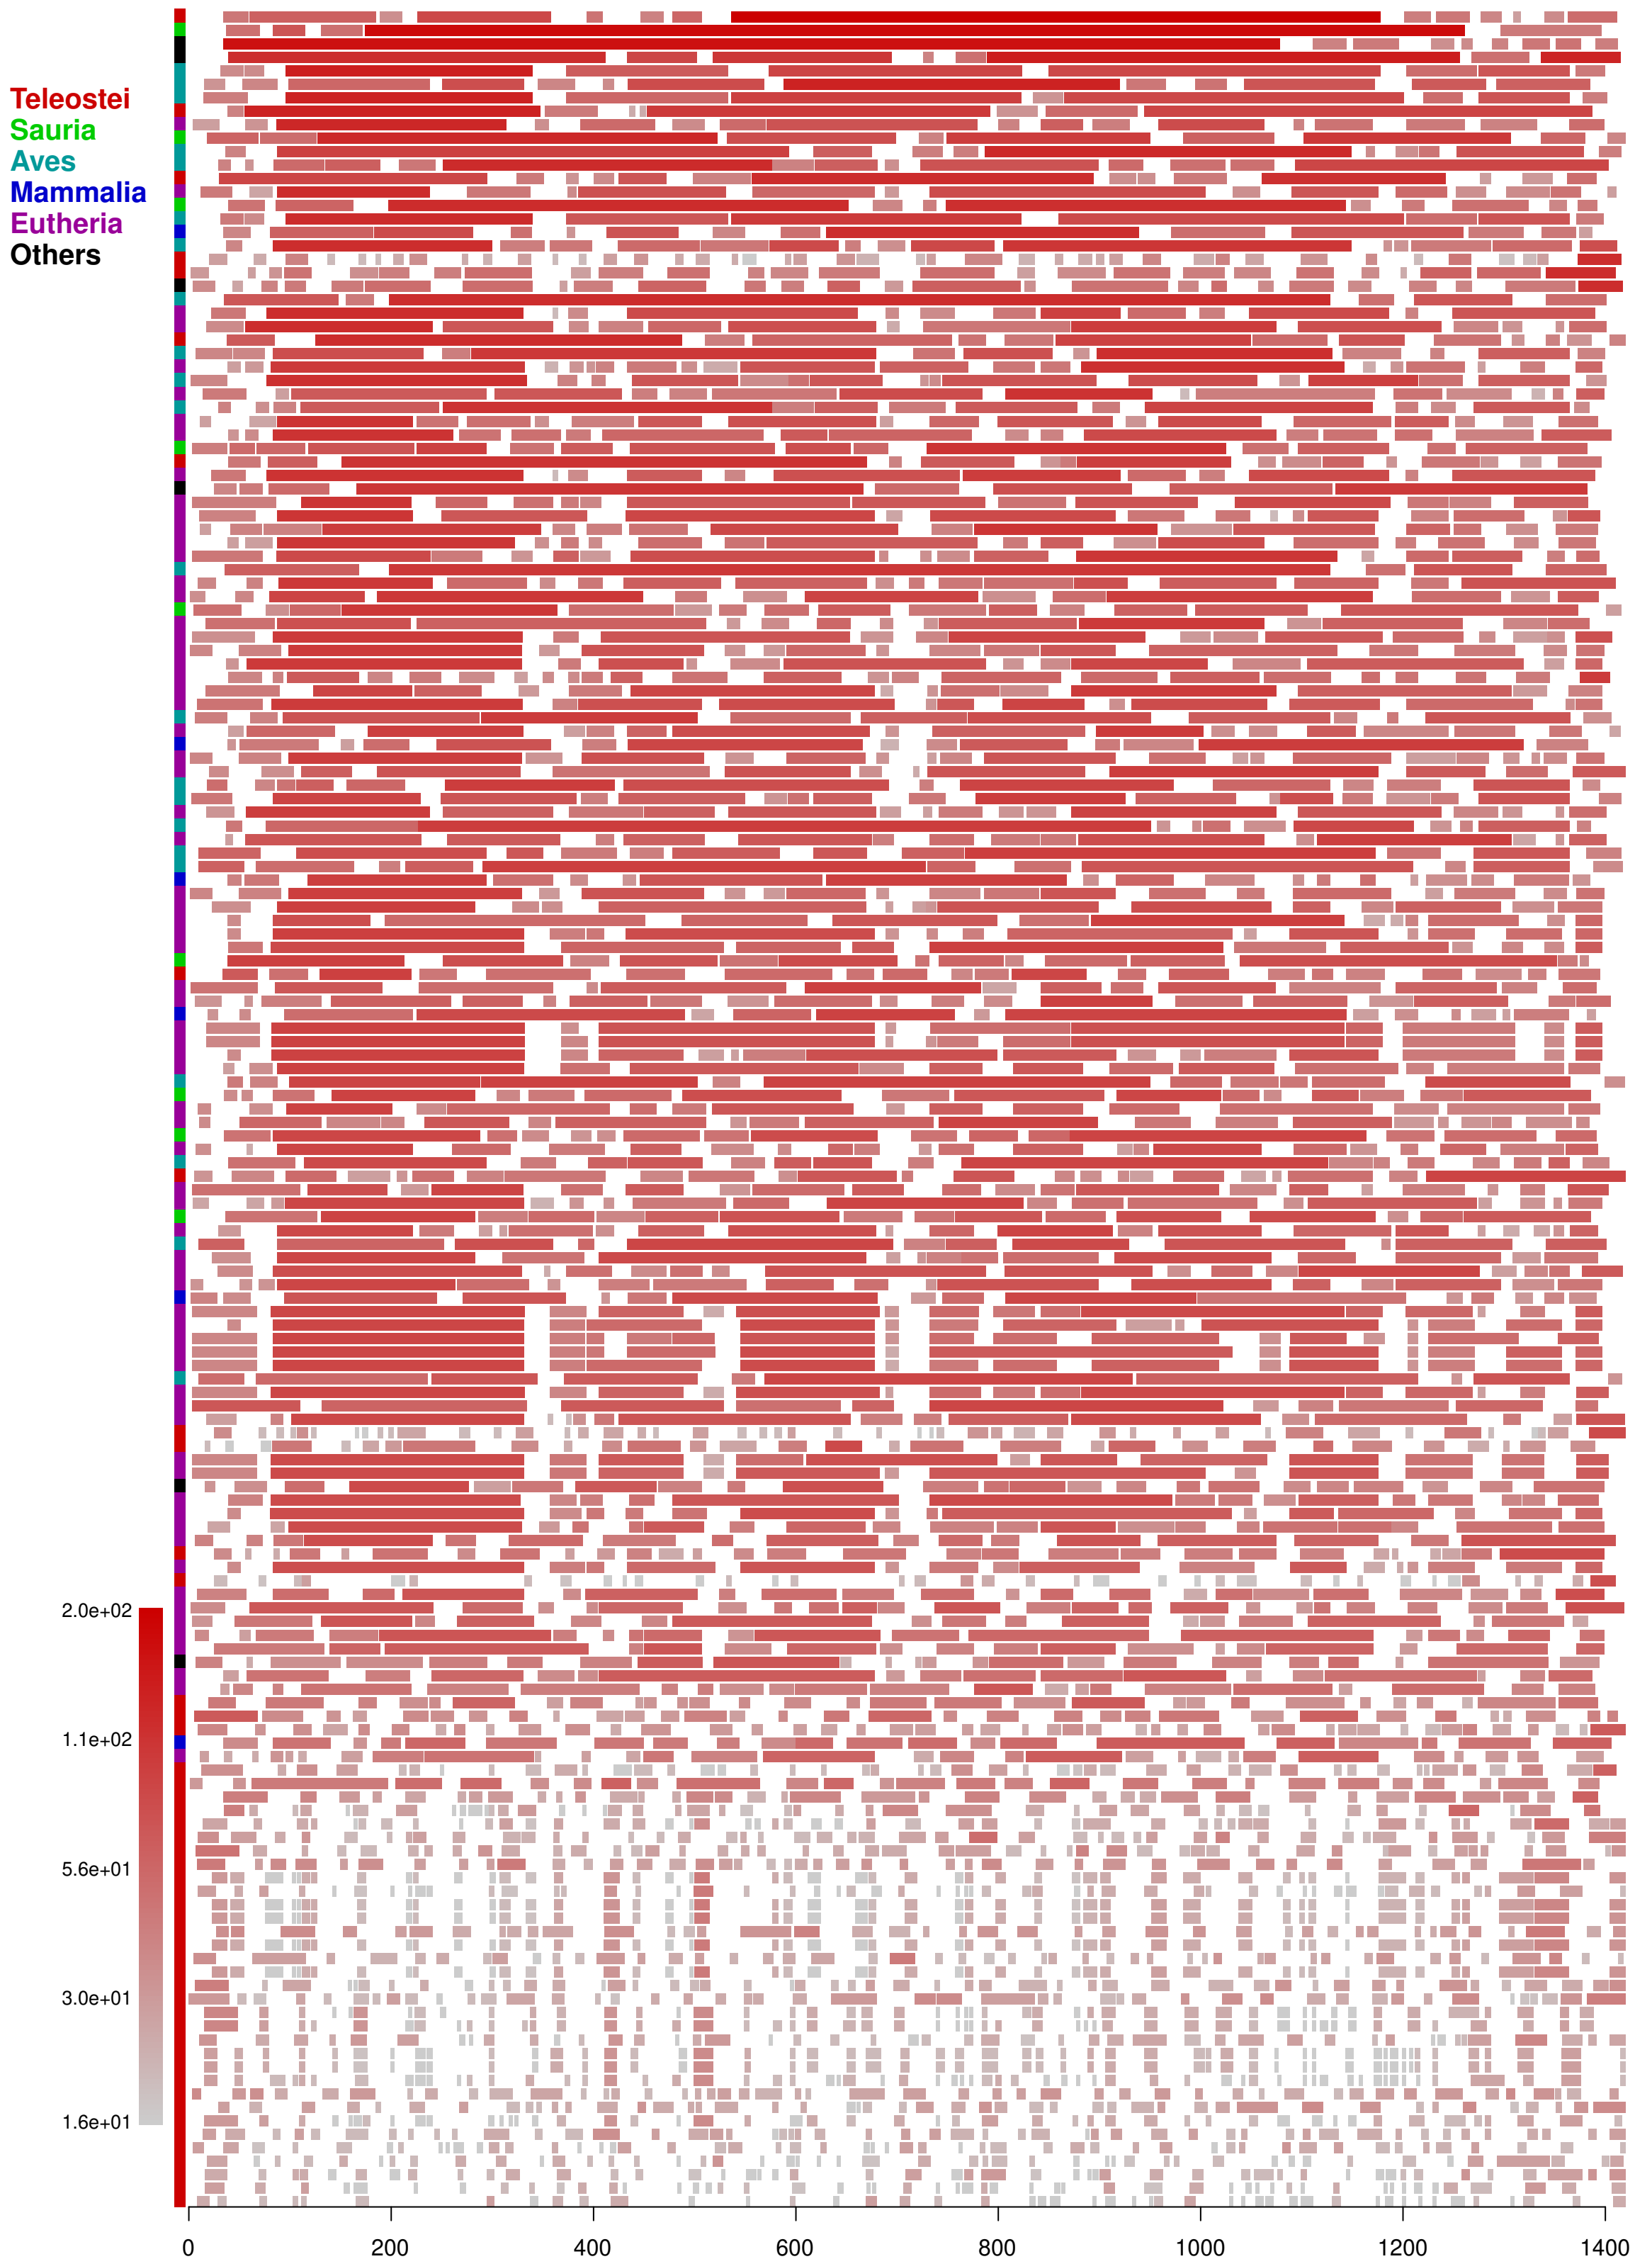

0 alignments above max size (1.0e+08)

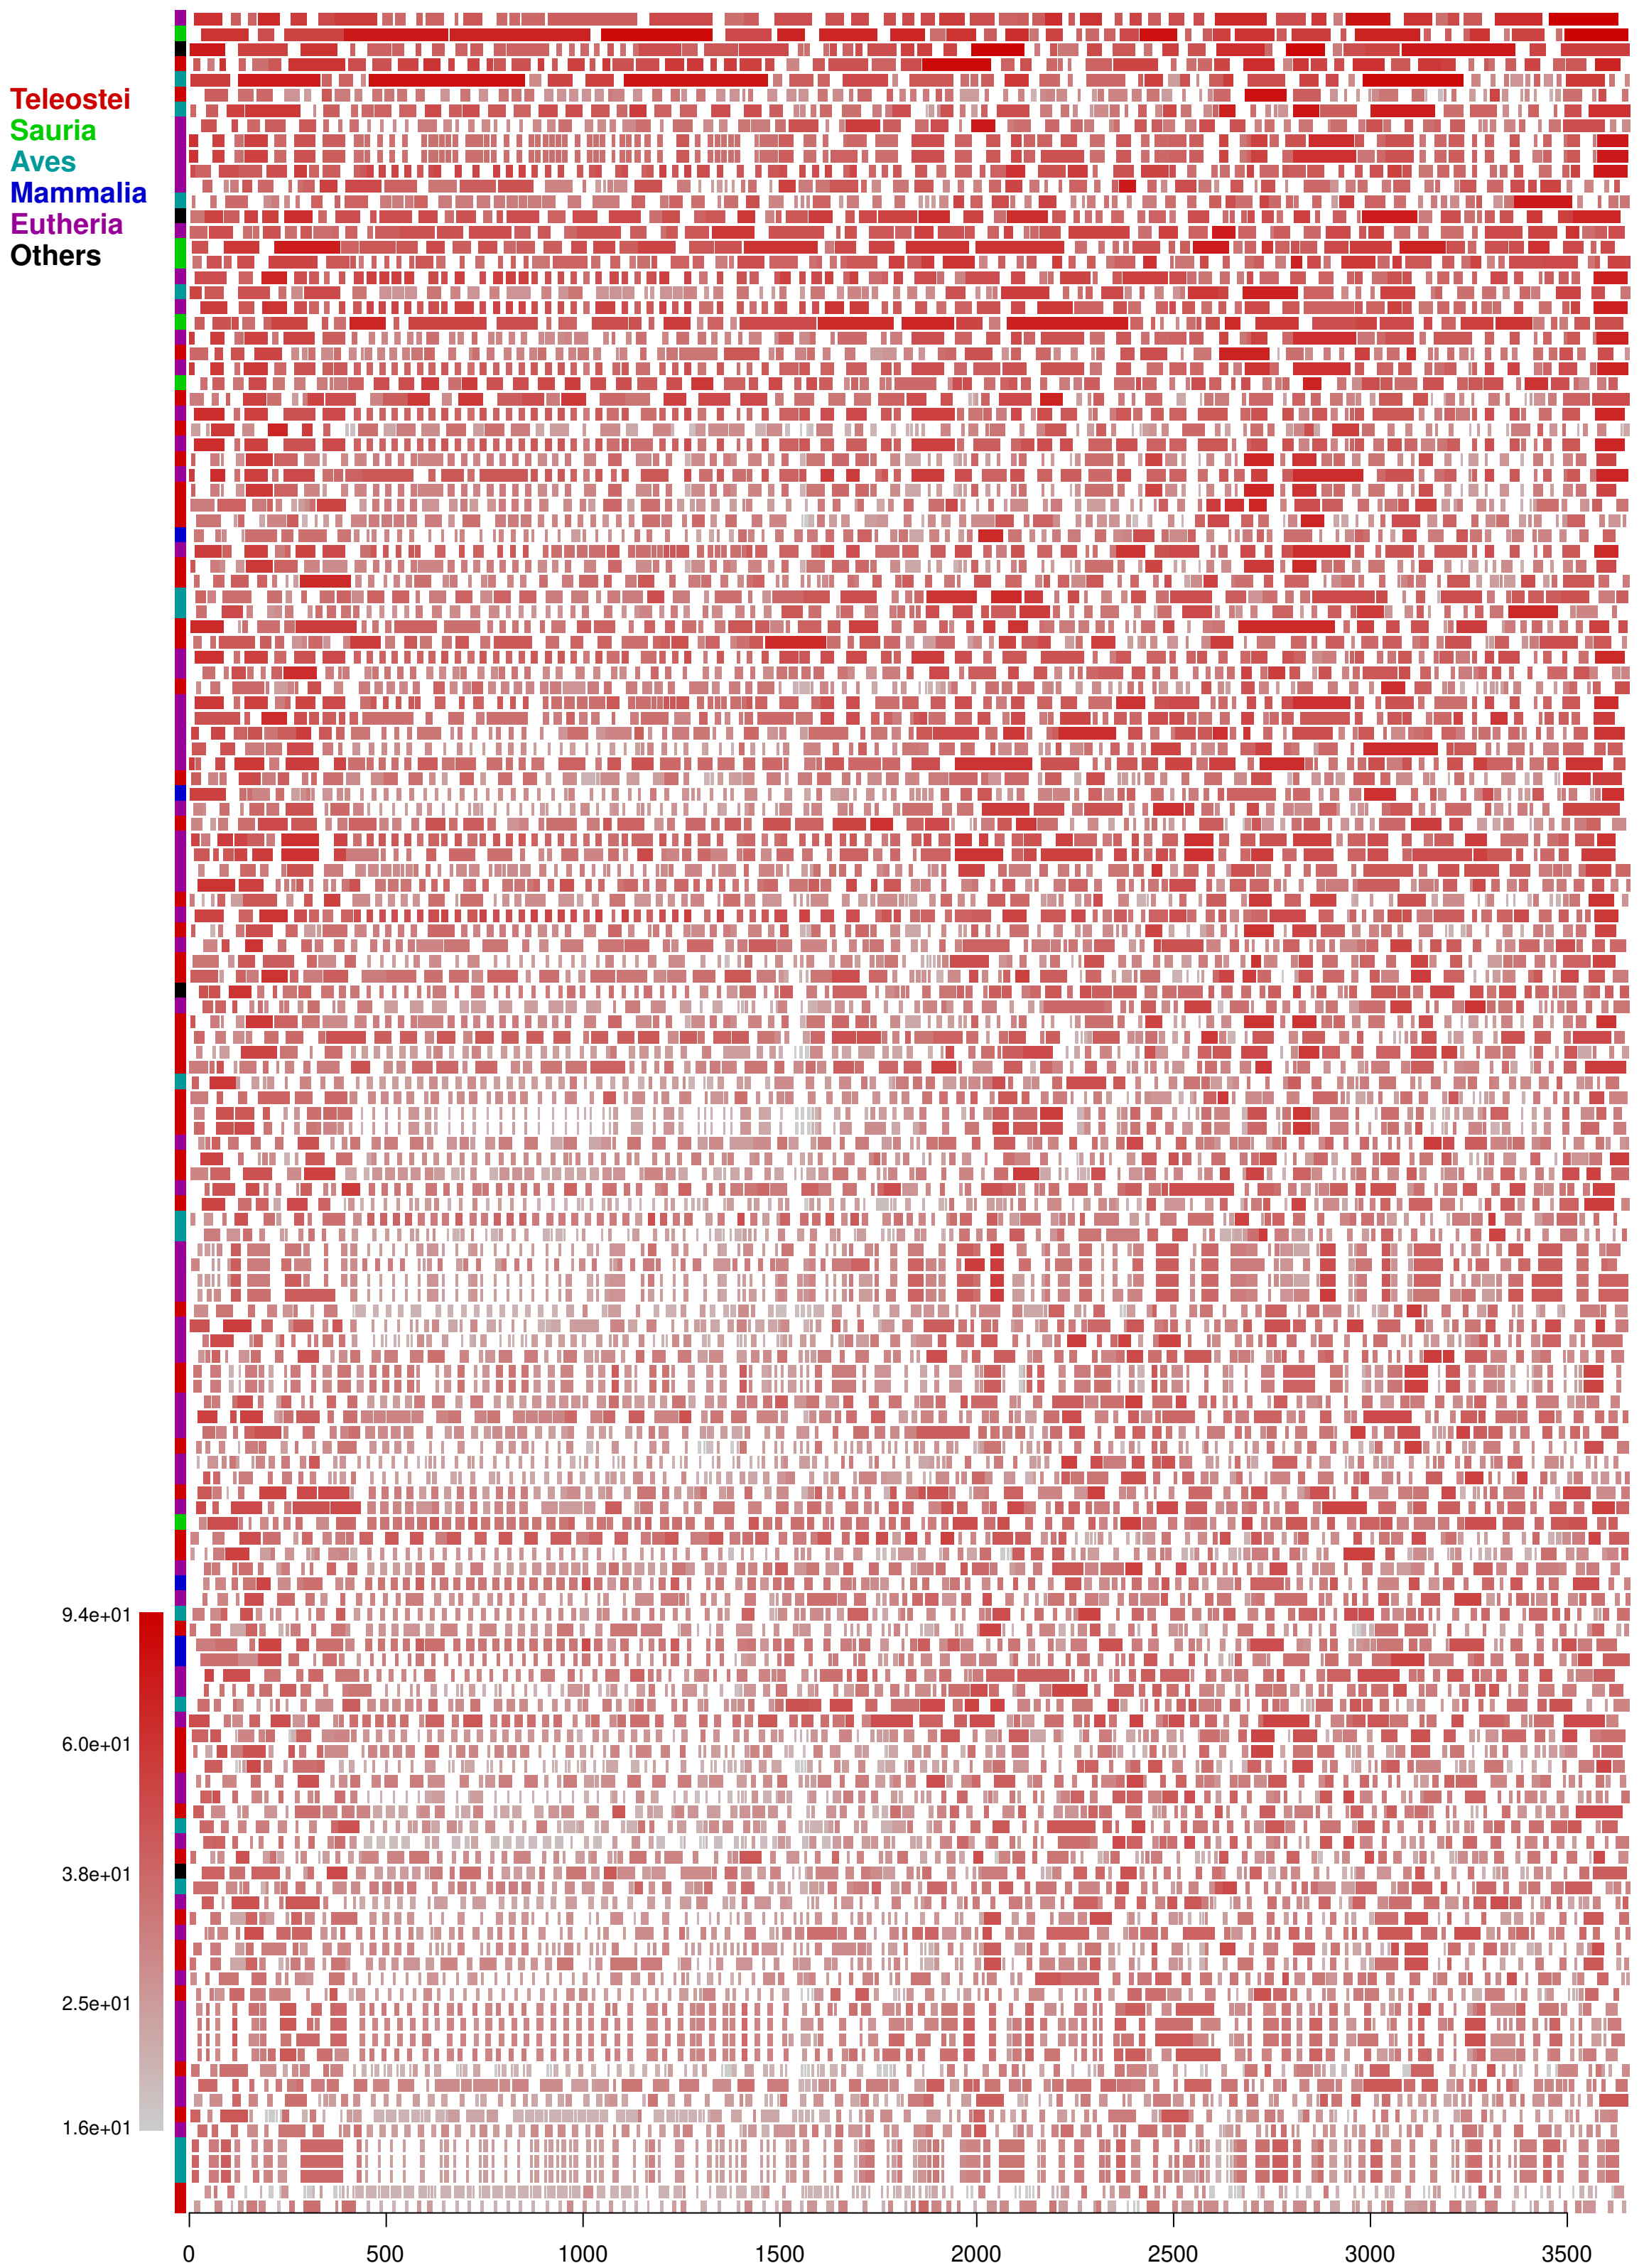

0 alignments above max size (1.0e+08)

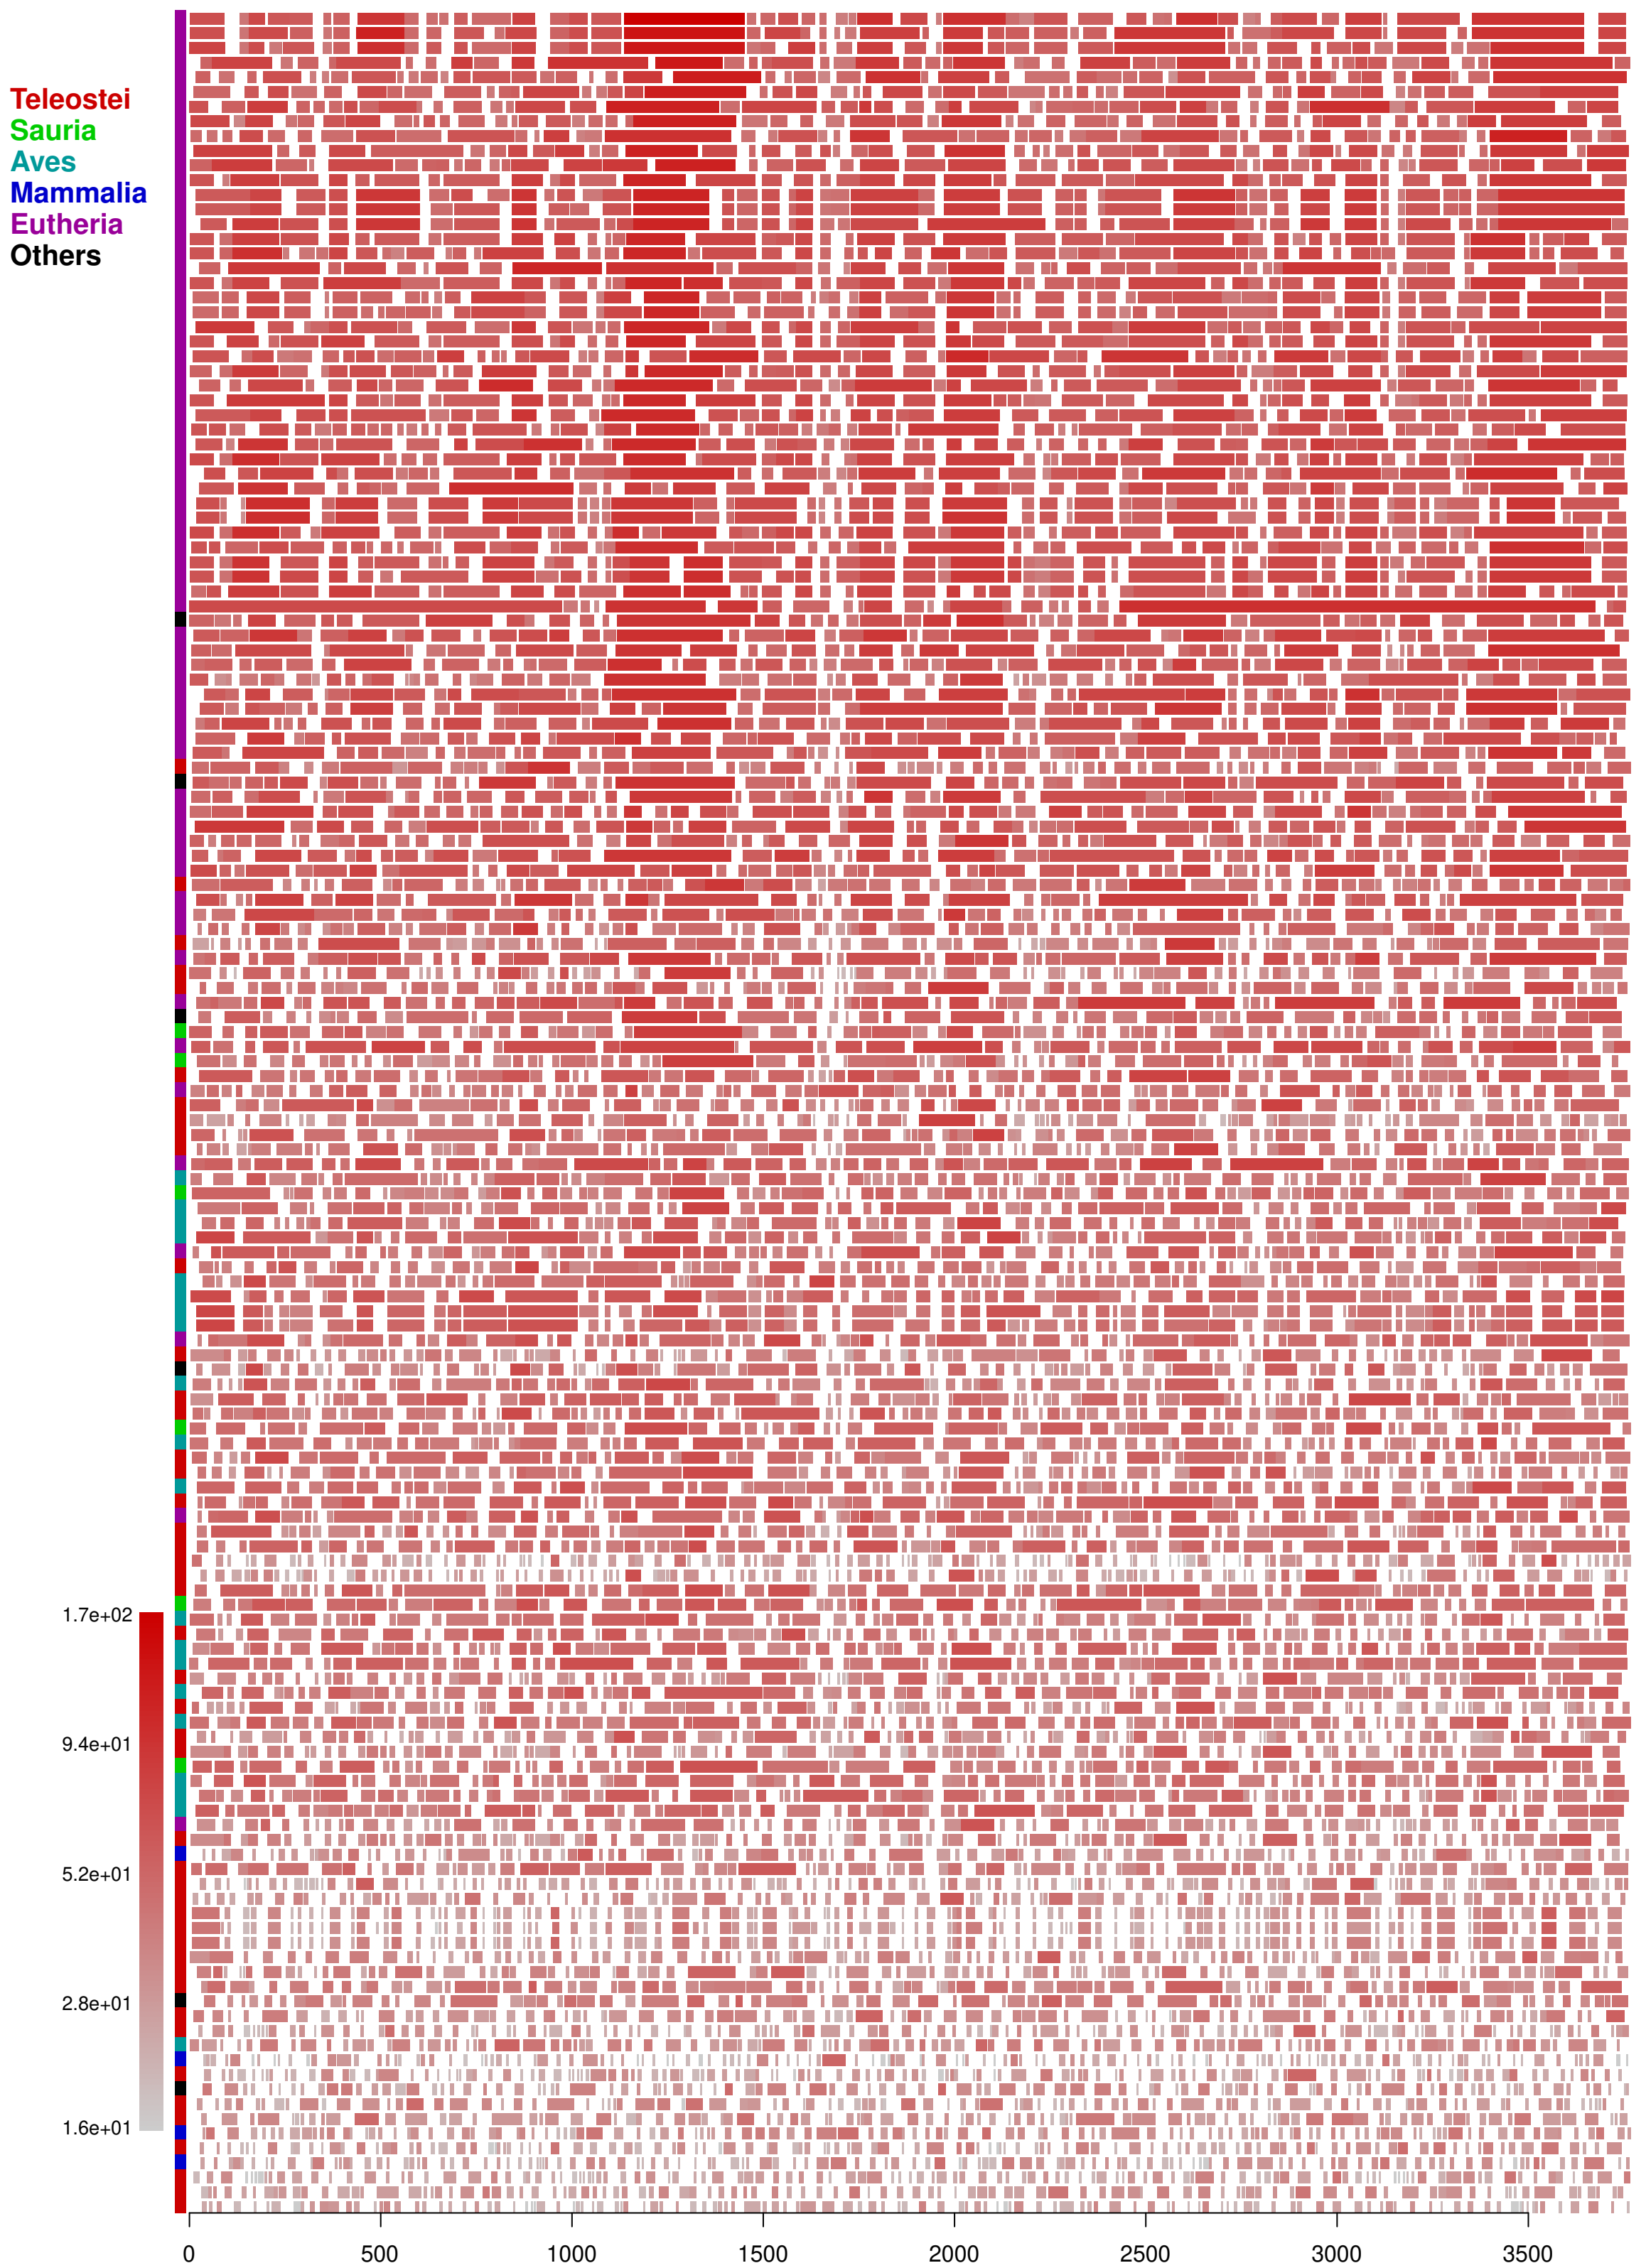

2 alignments above max size (1.0e+08)

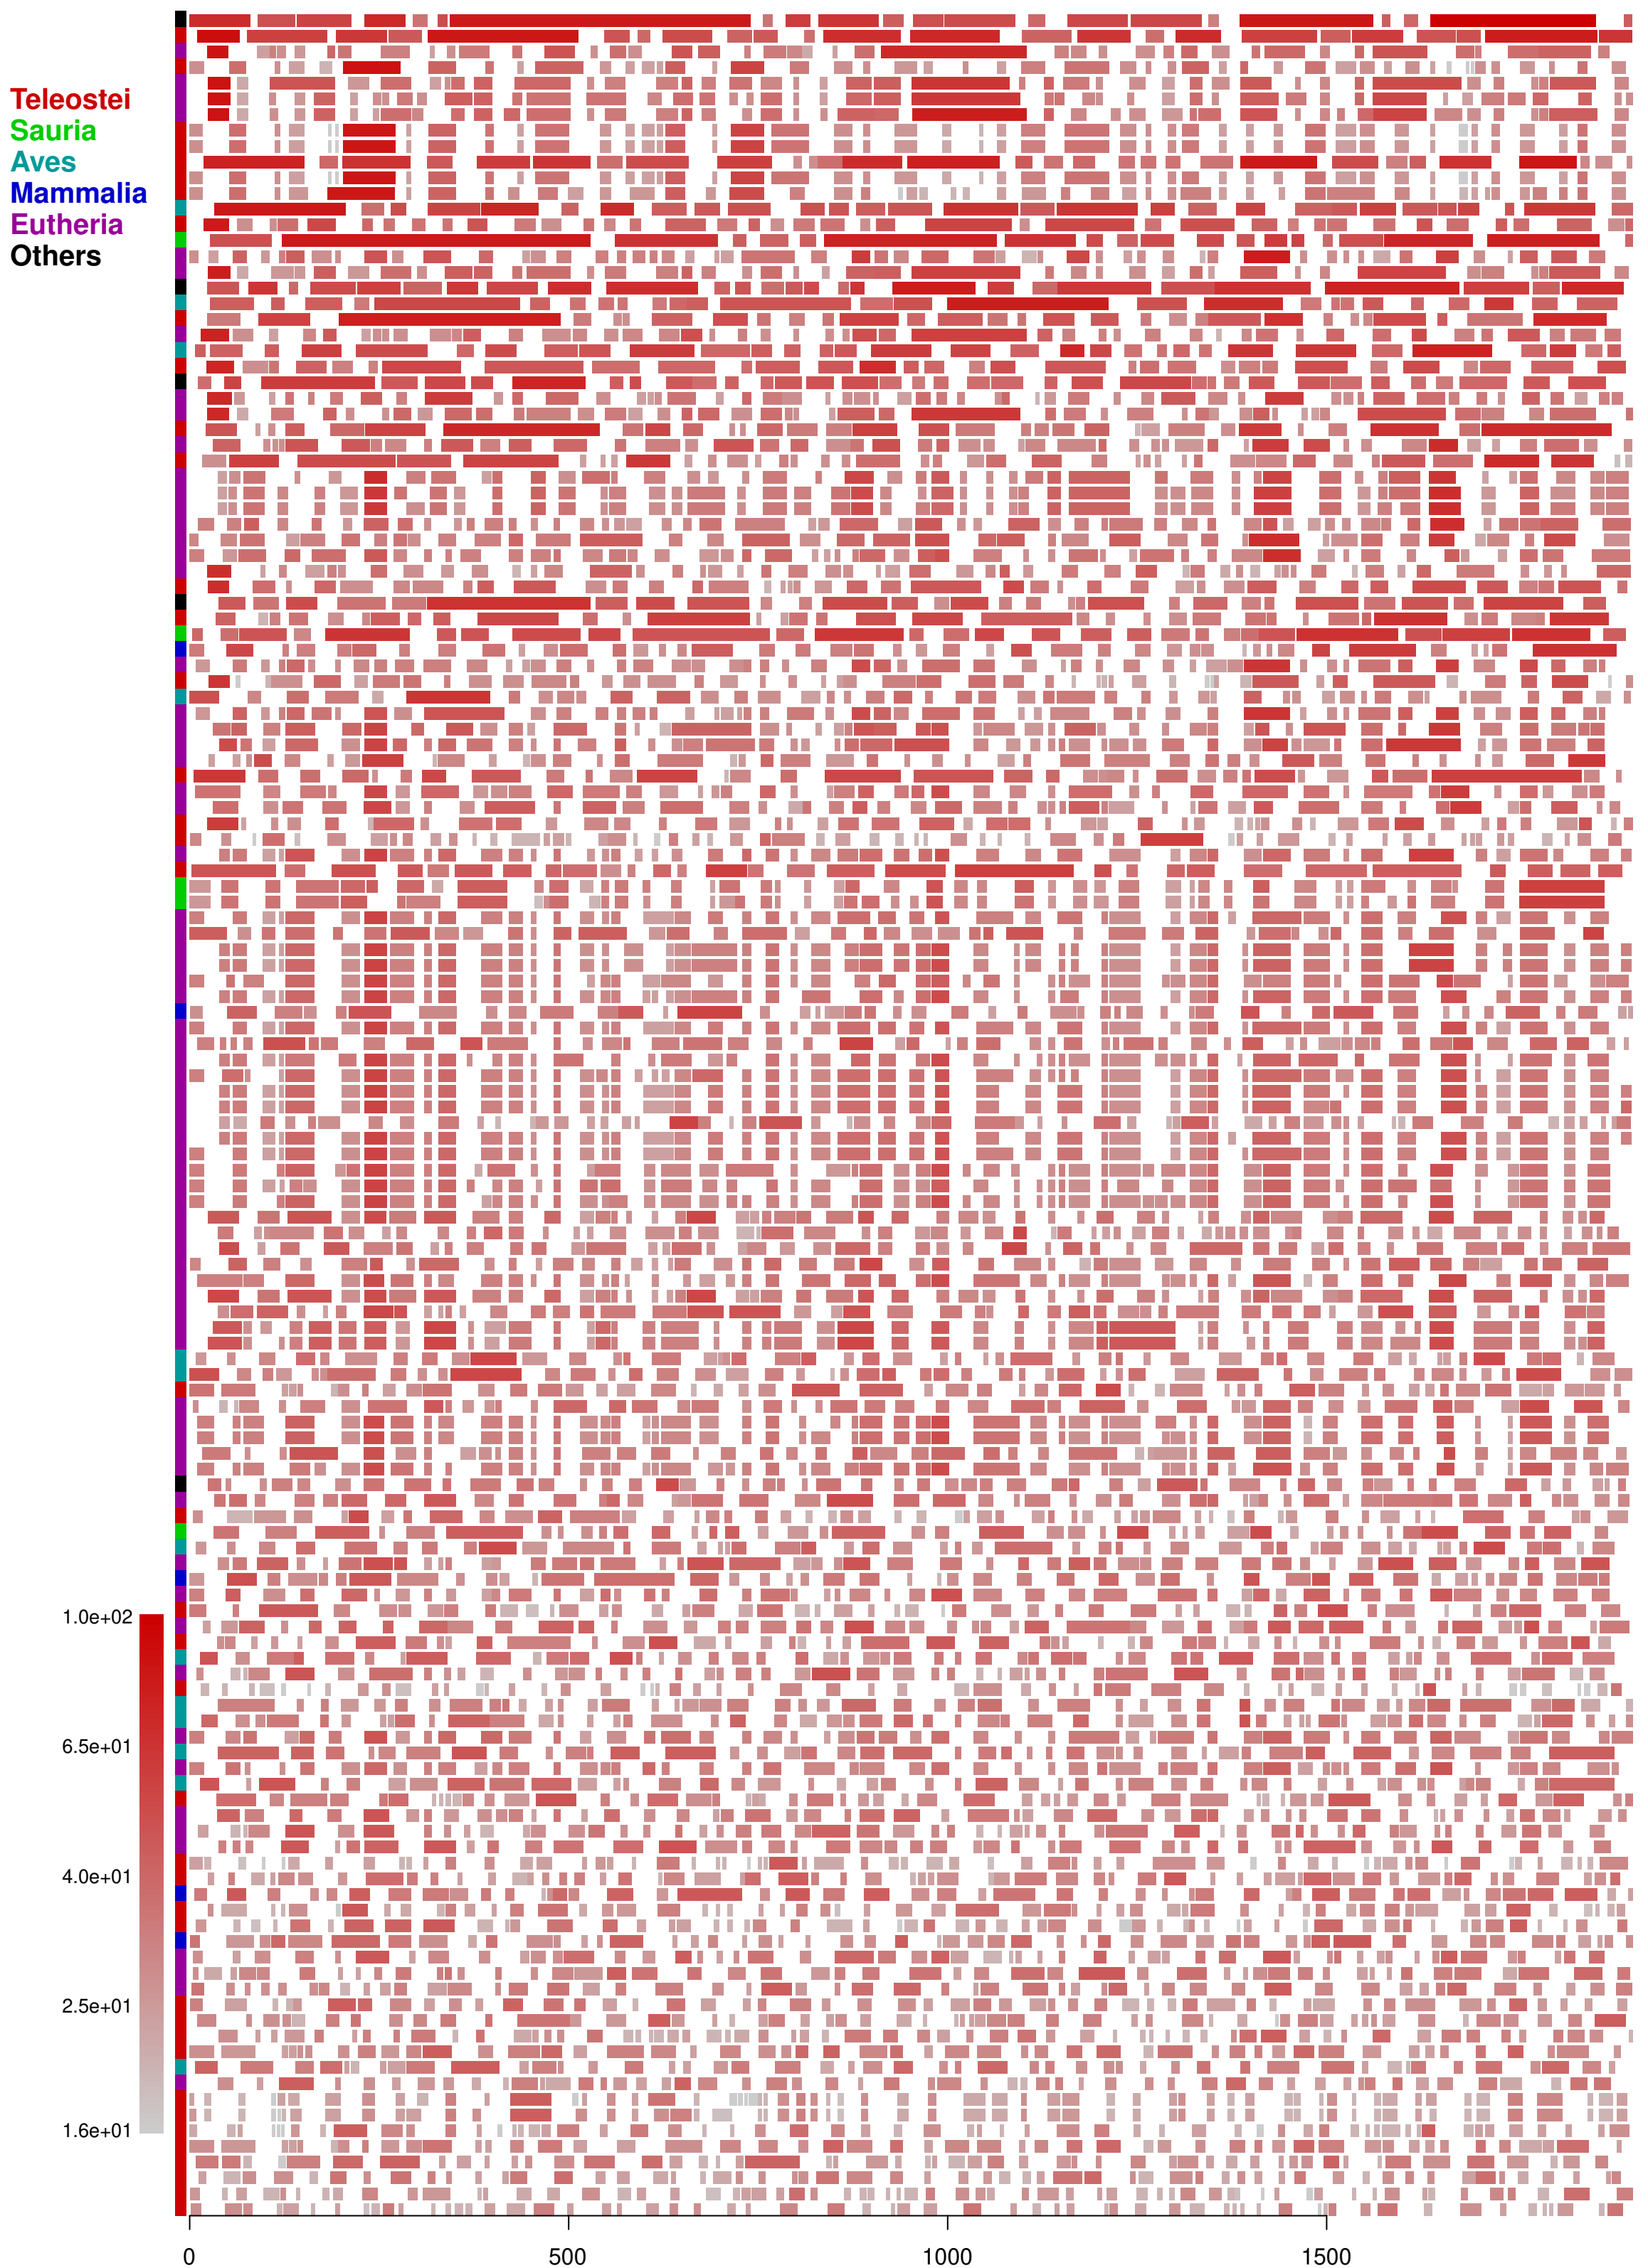

0 alignments above max size (1.0e+08)

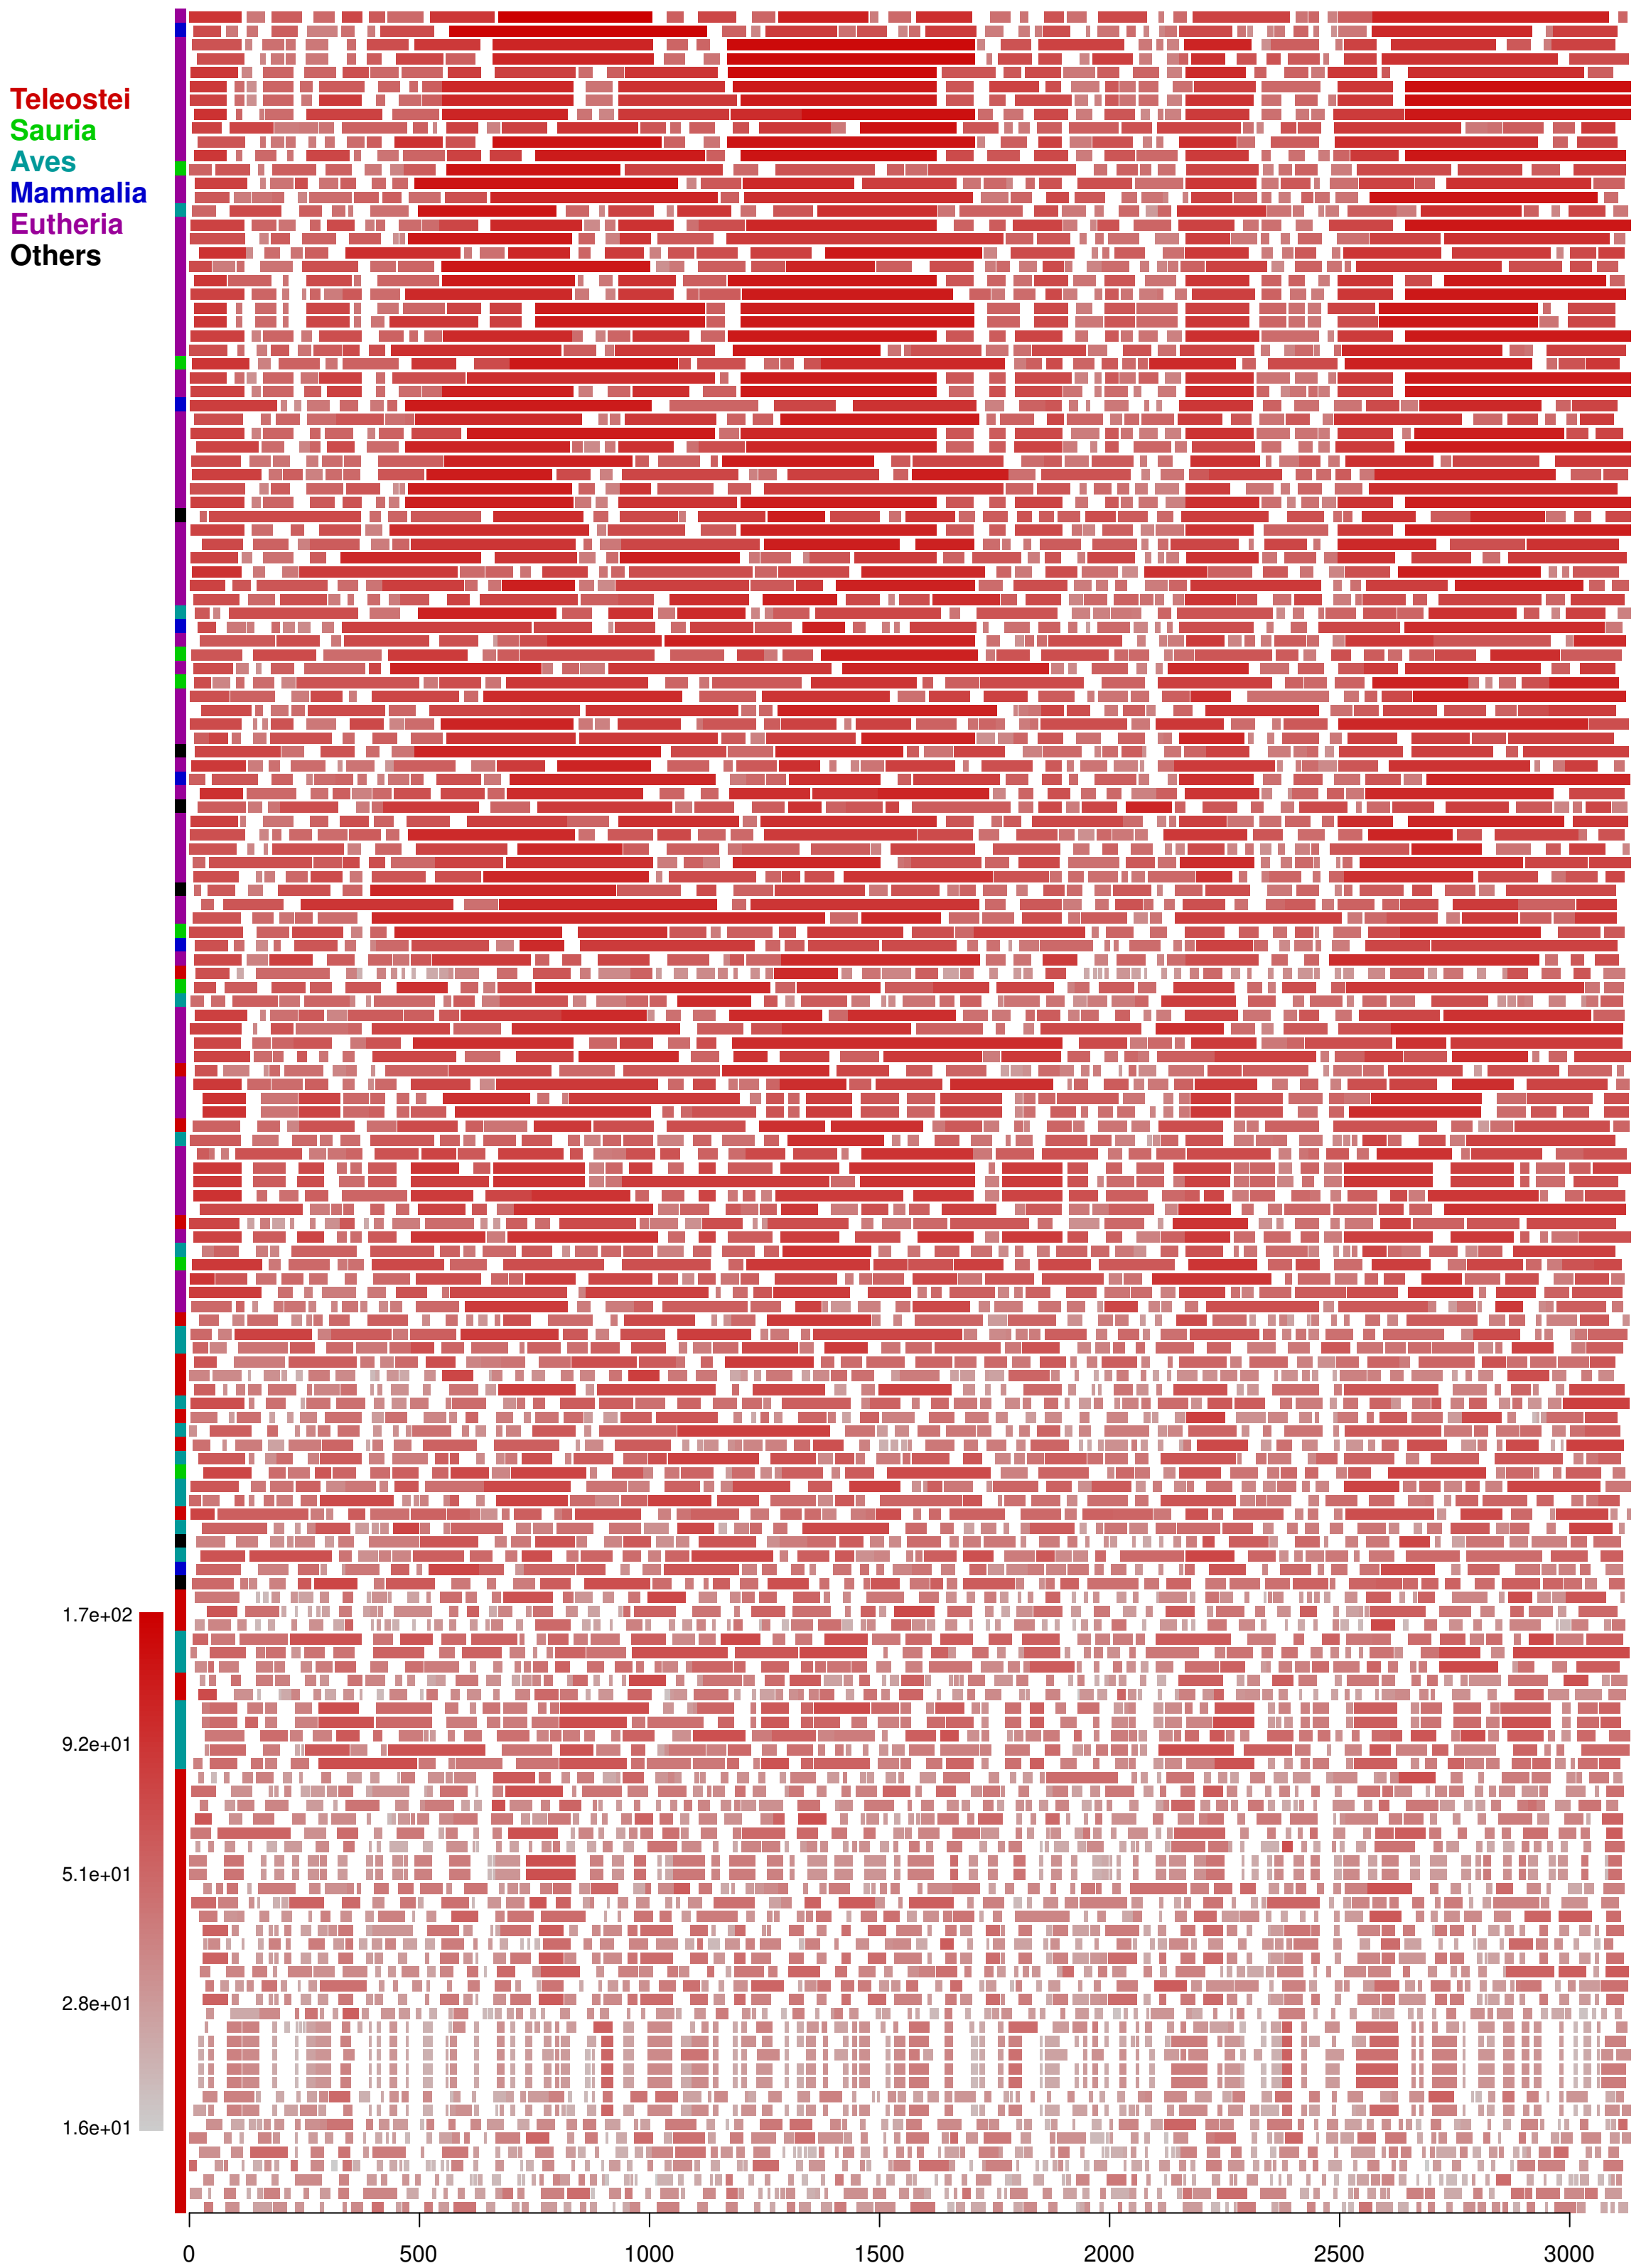

1 alignments above max size (1.0e+08)

Teleostei  
Sauria  
Aves  
Mammalia  
Eutheria  
Others

1.4e+02  
7.9e+01  
4.6e+01  
2.7e+01  
1.6e+01

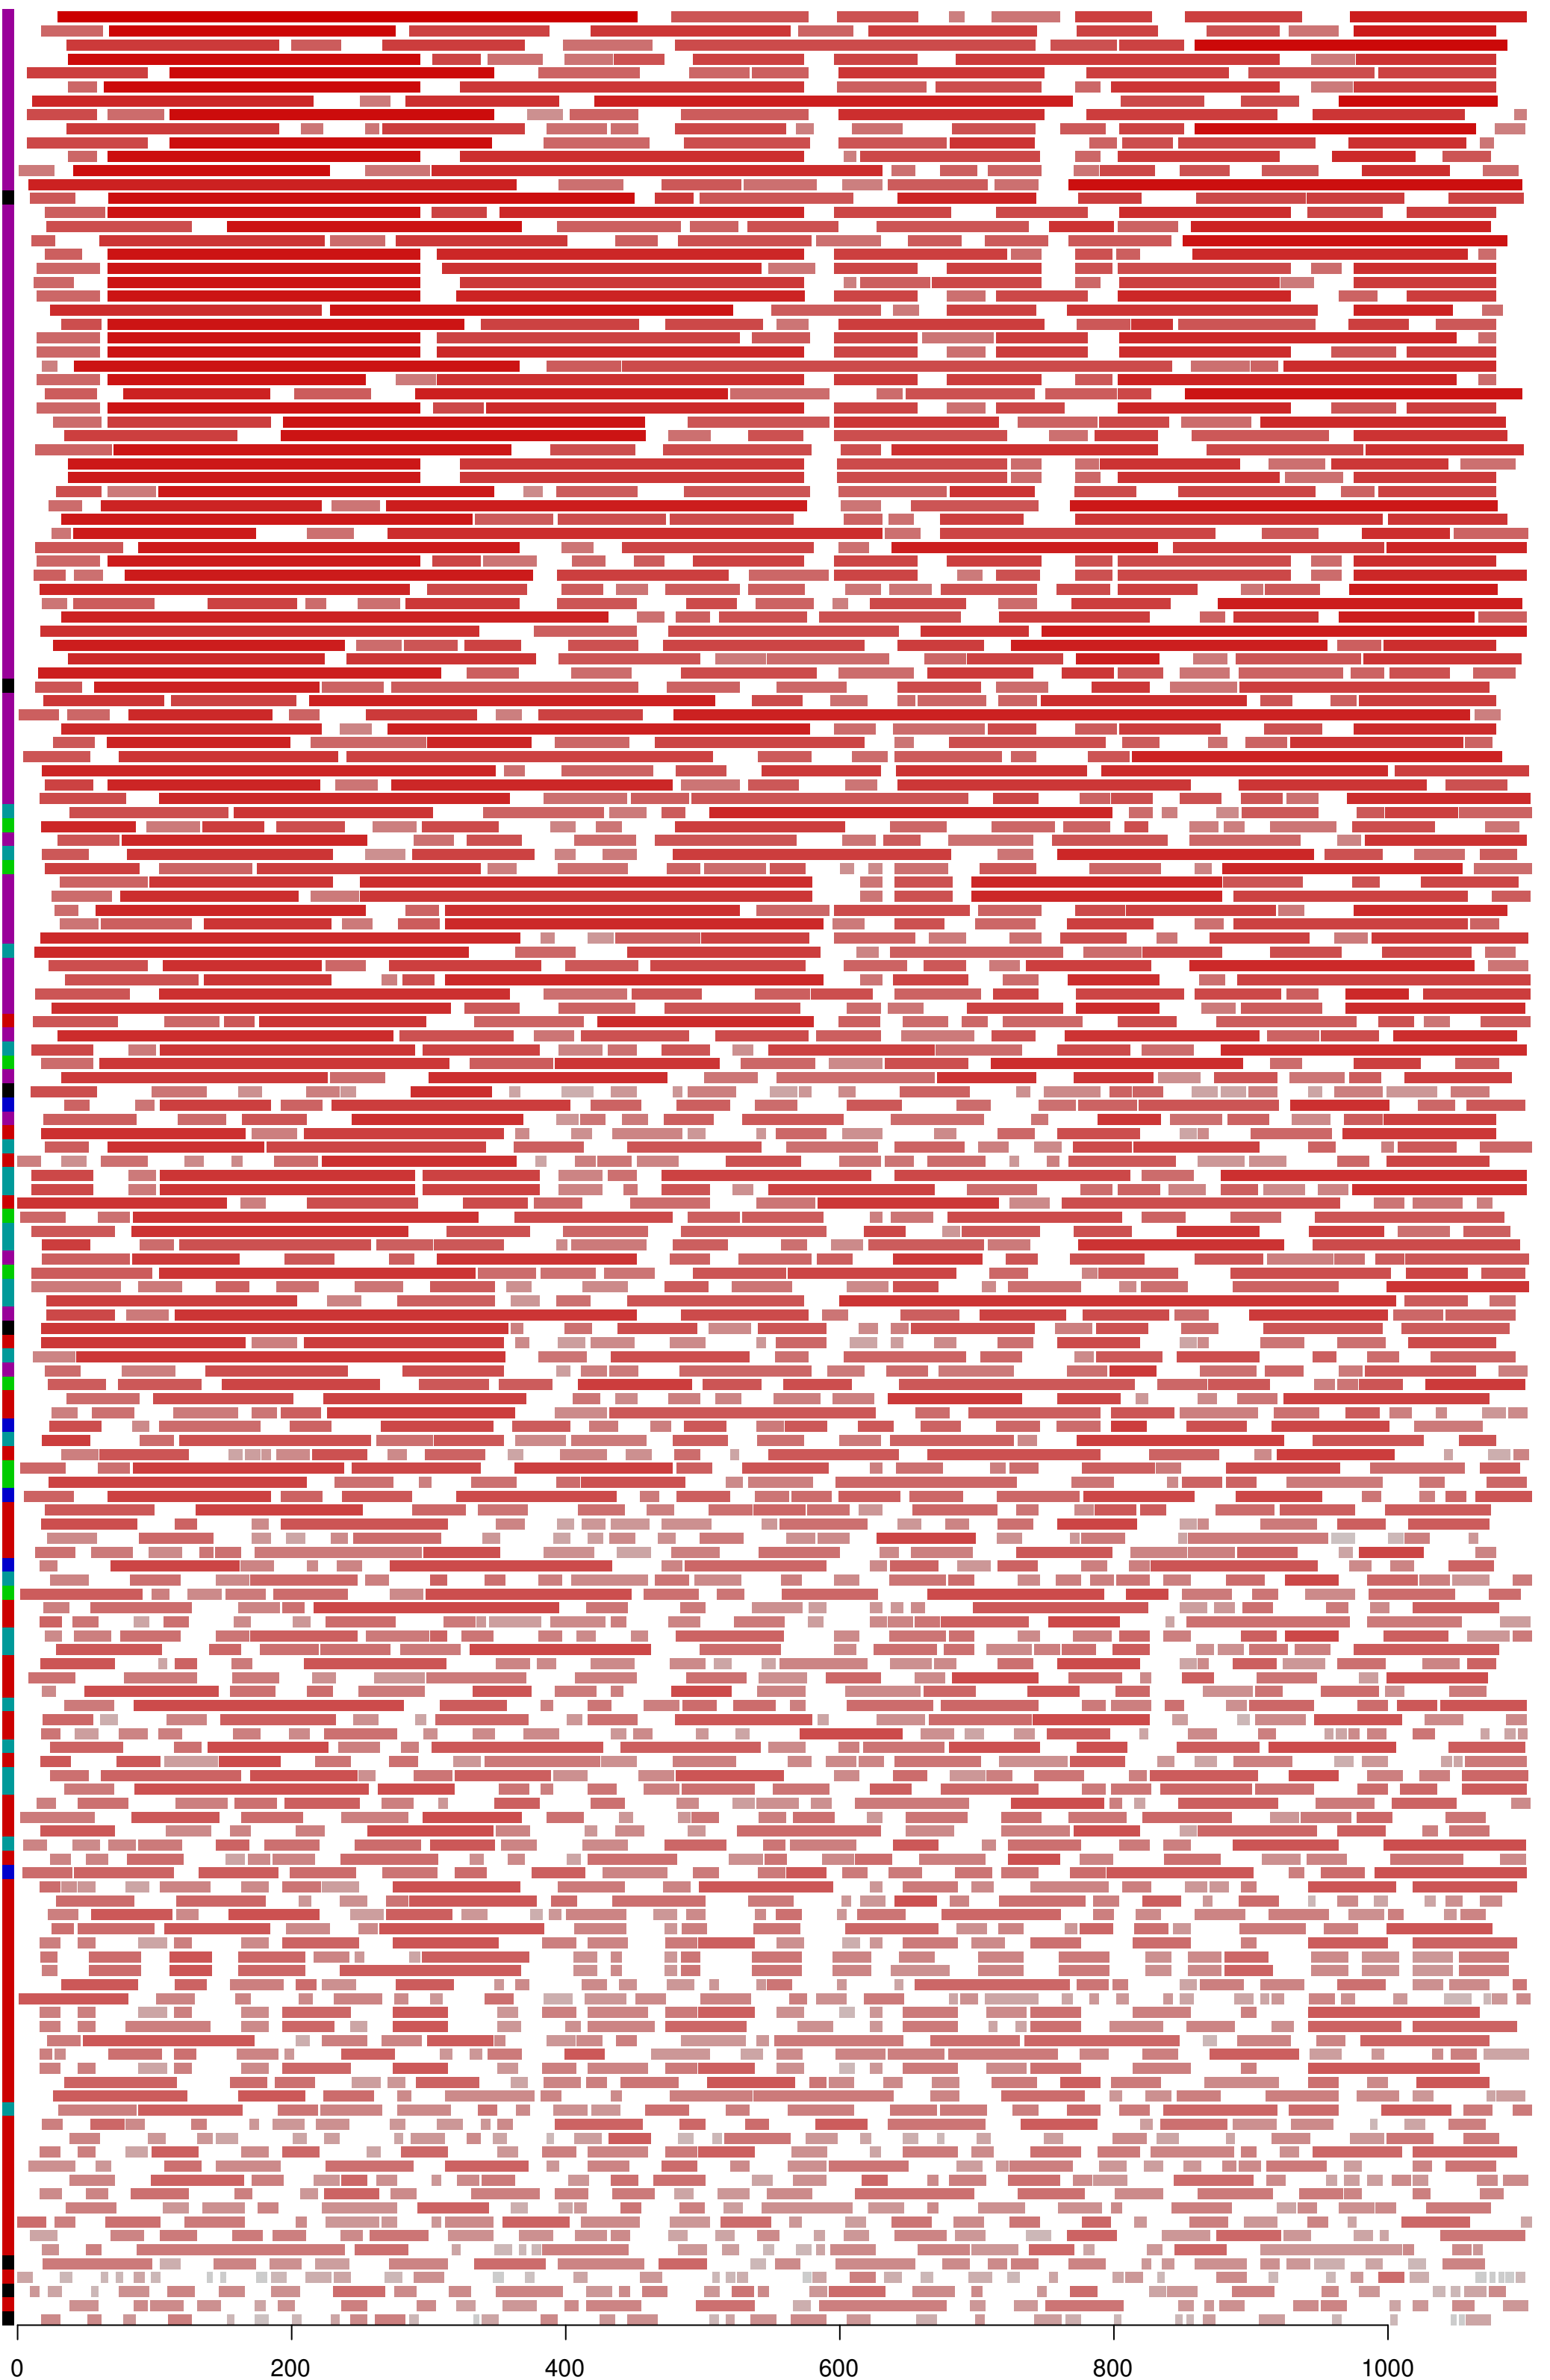

0 alignments above max size (1.0e+08)

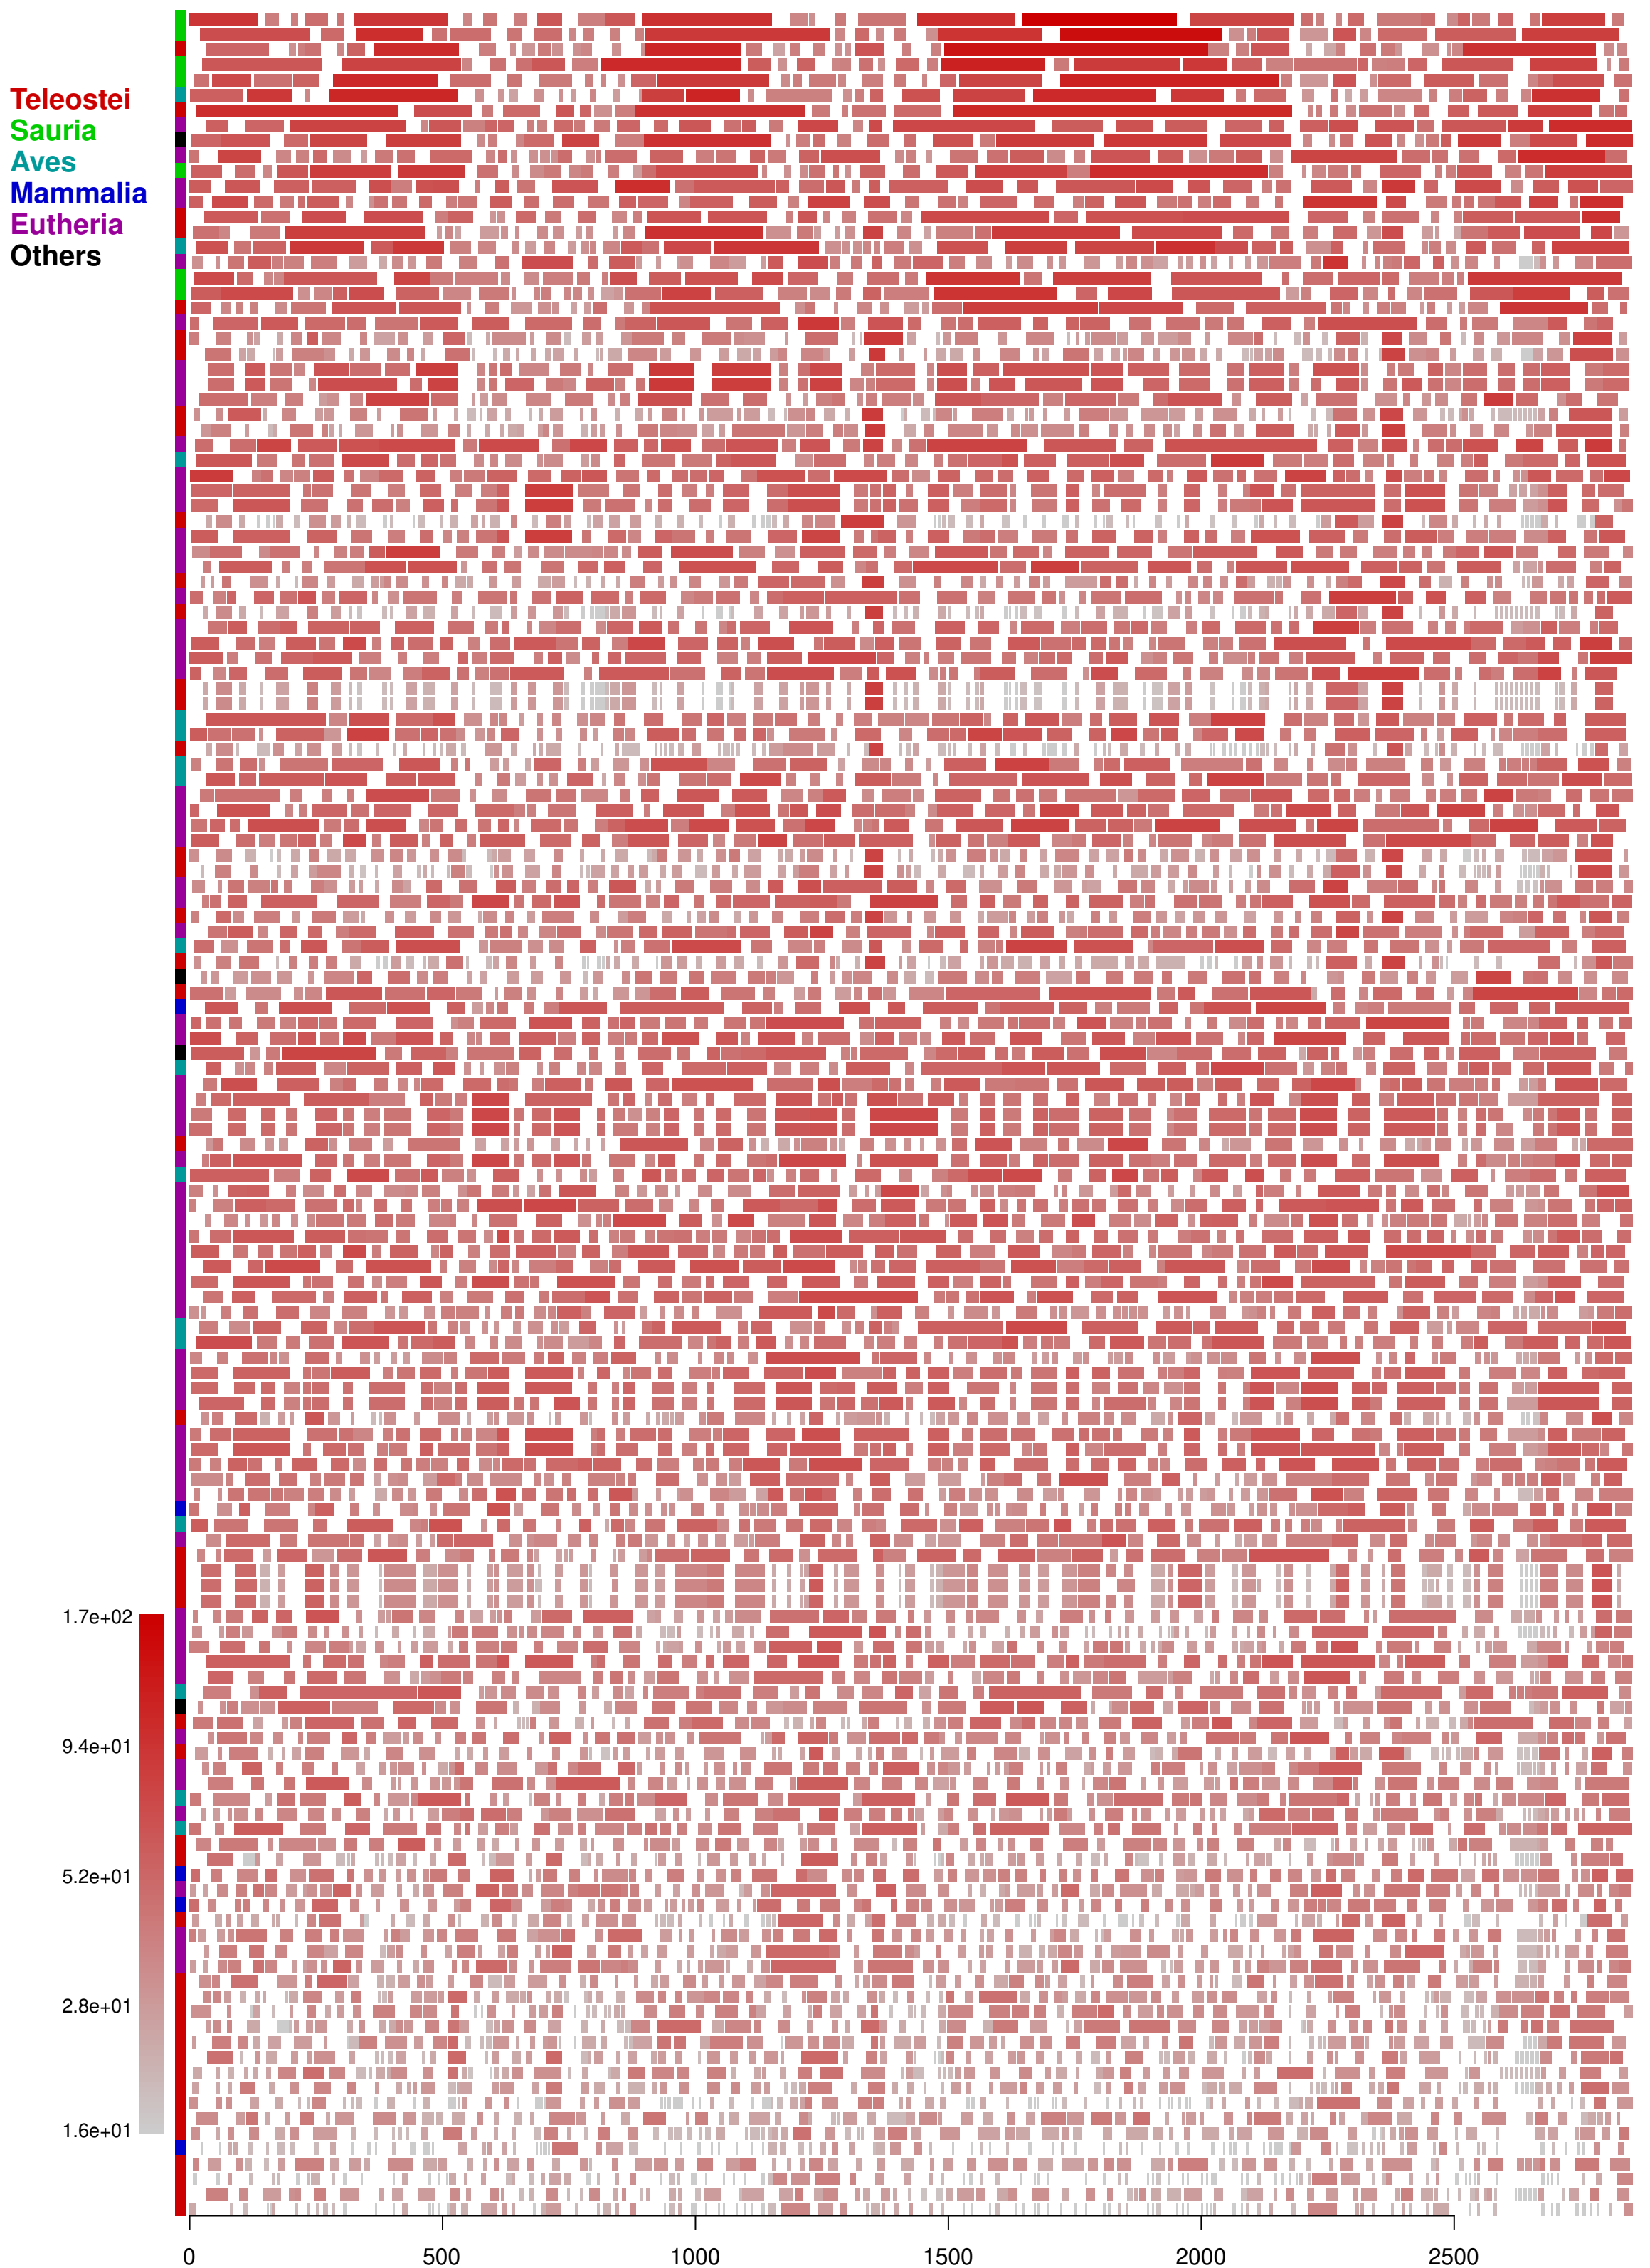

0 alignments above max size (1.0e+08)



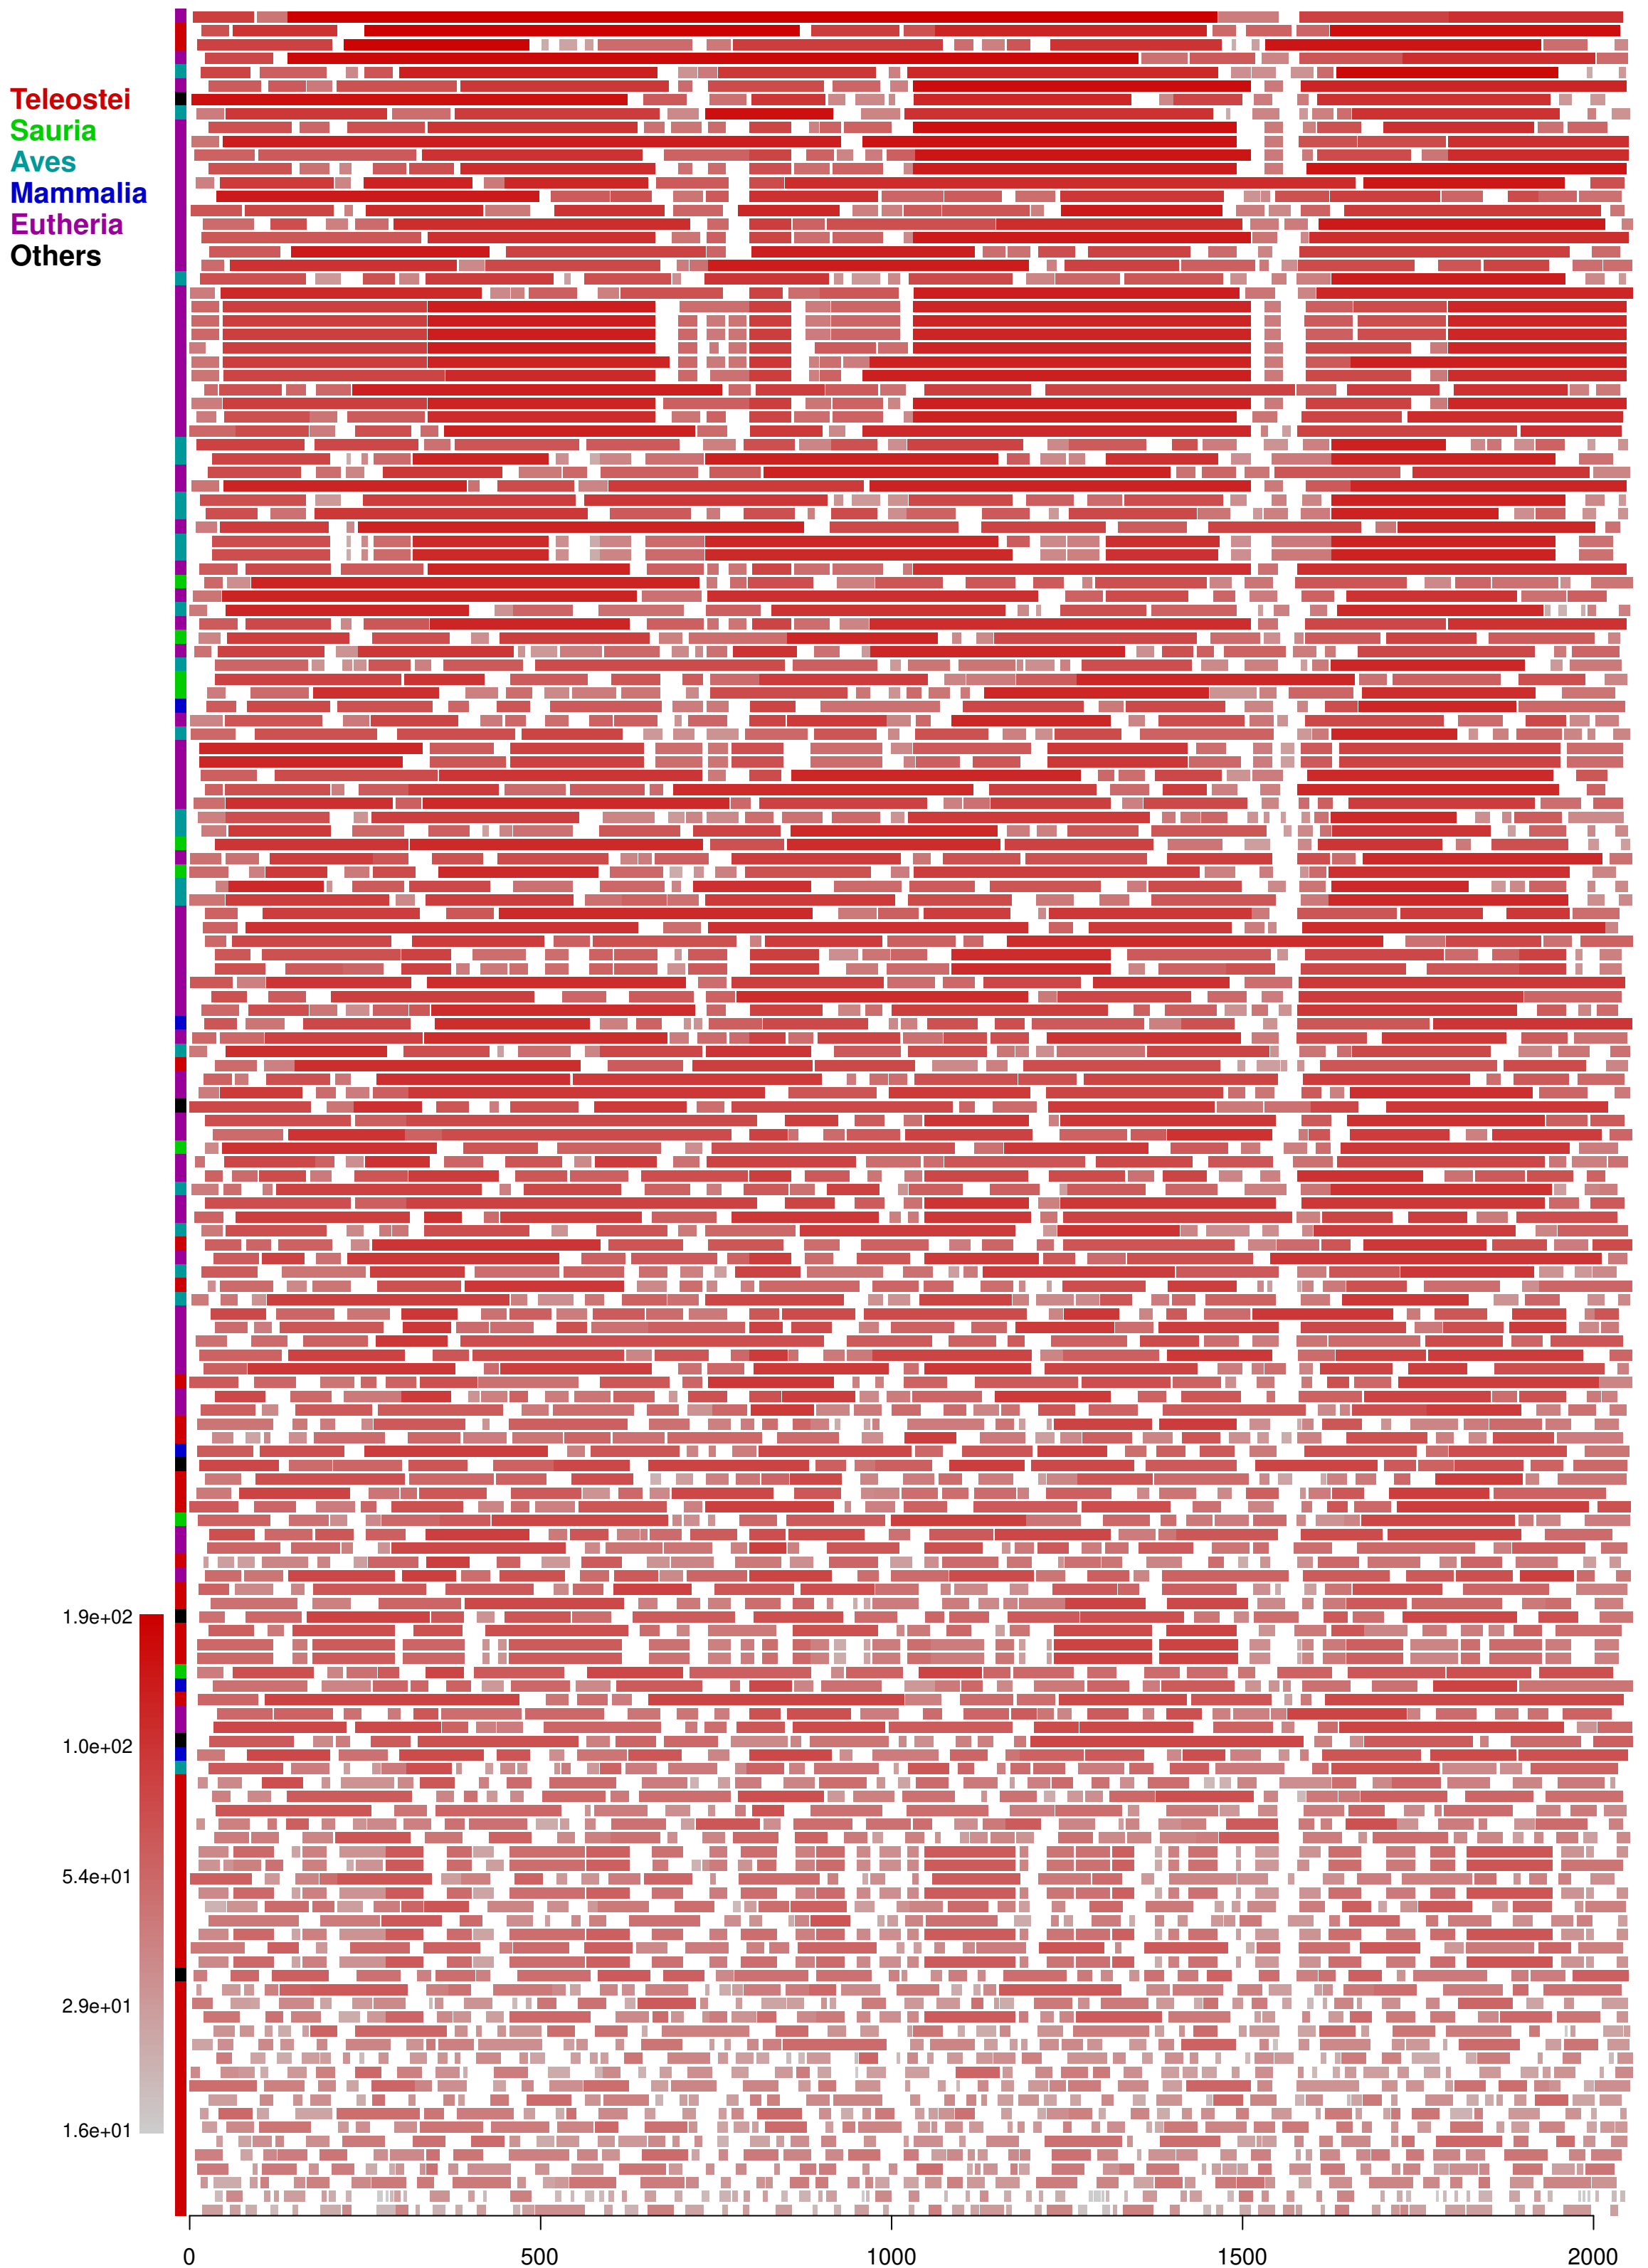

0 alignments above max size (1.0e+08)

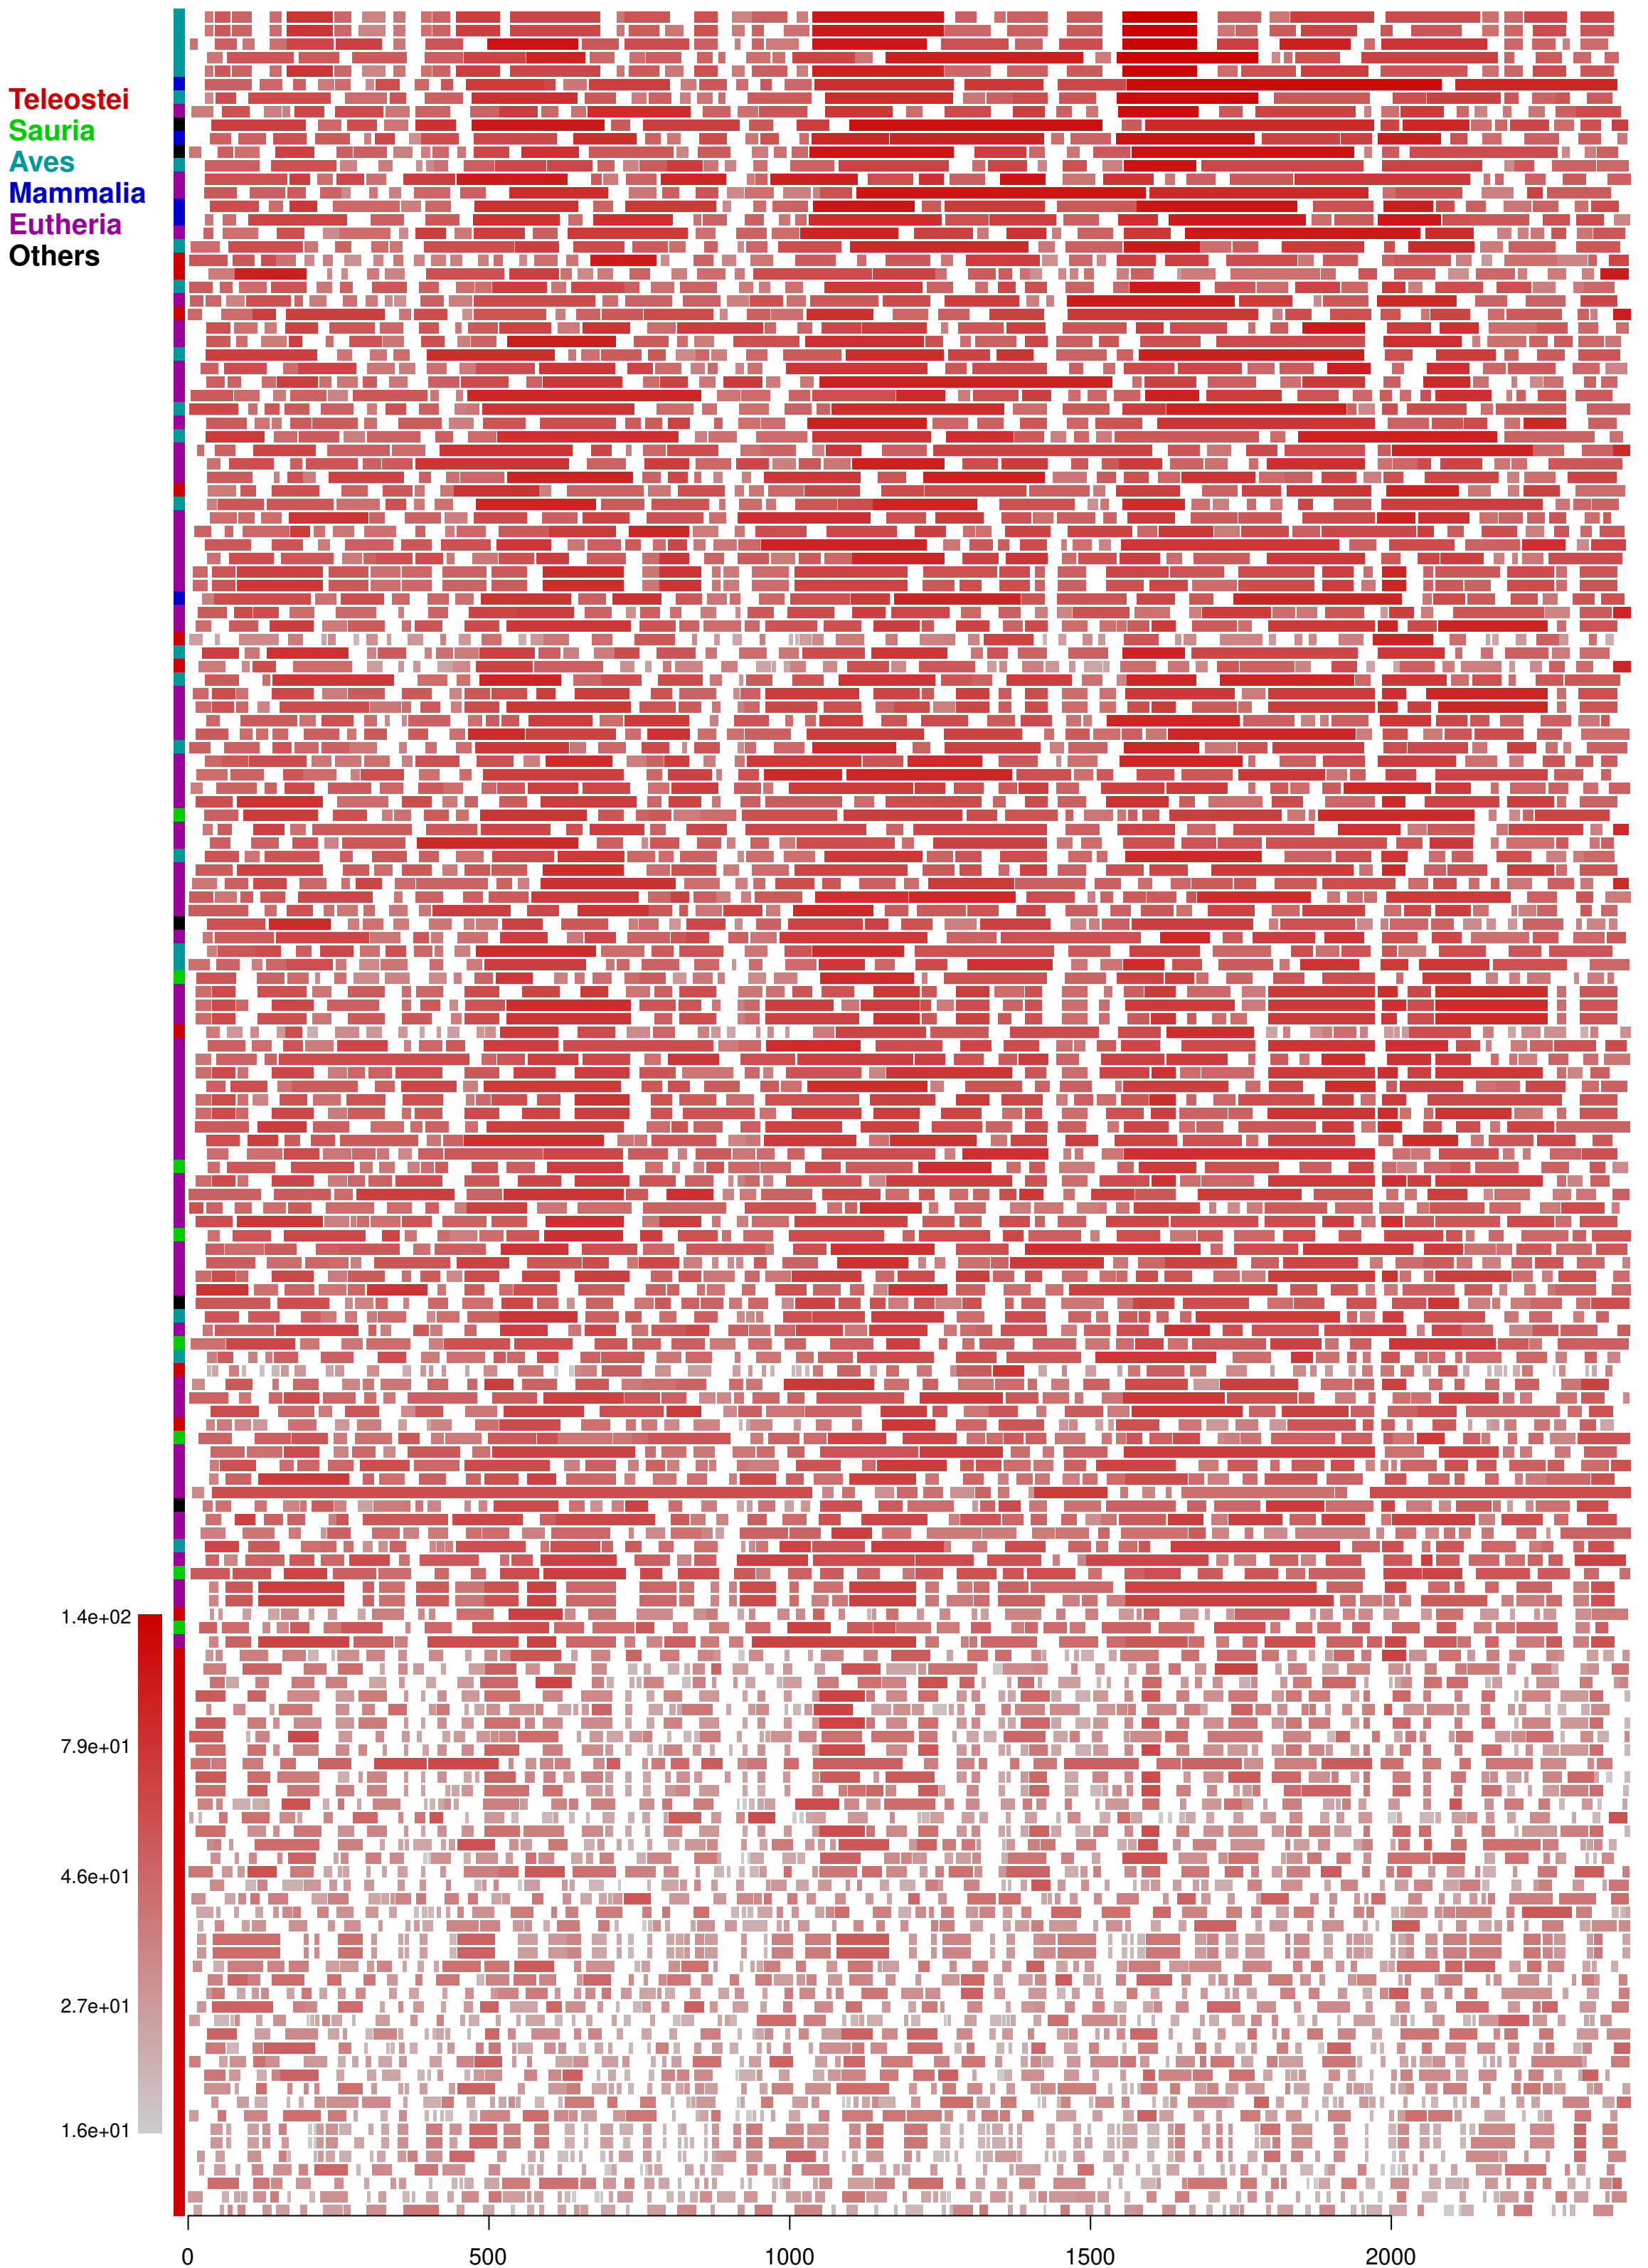

0 alignments above max size (1.0e+08)

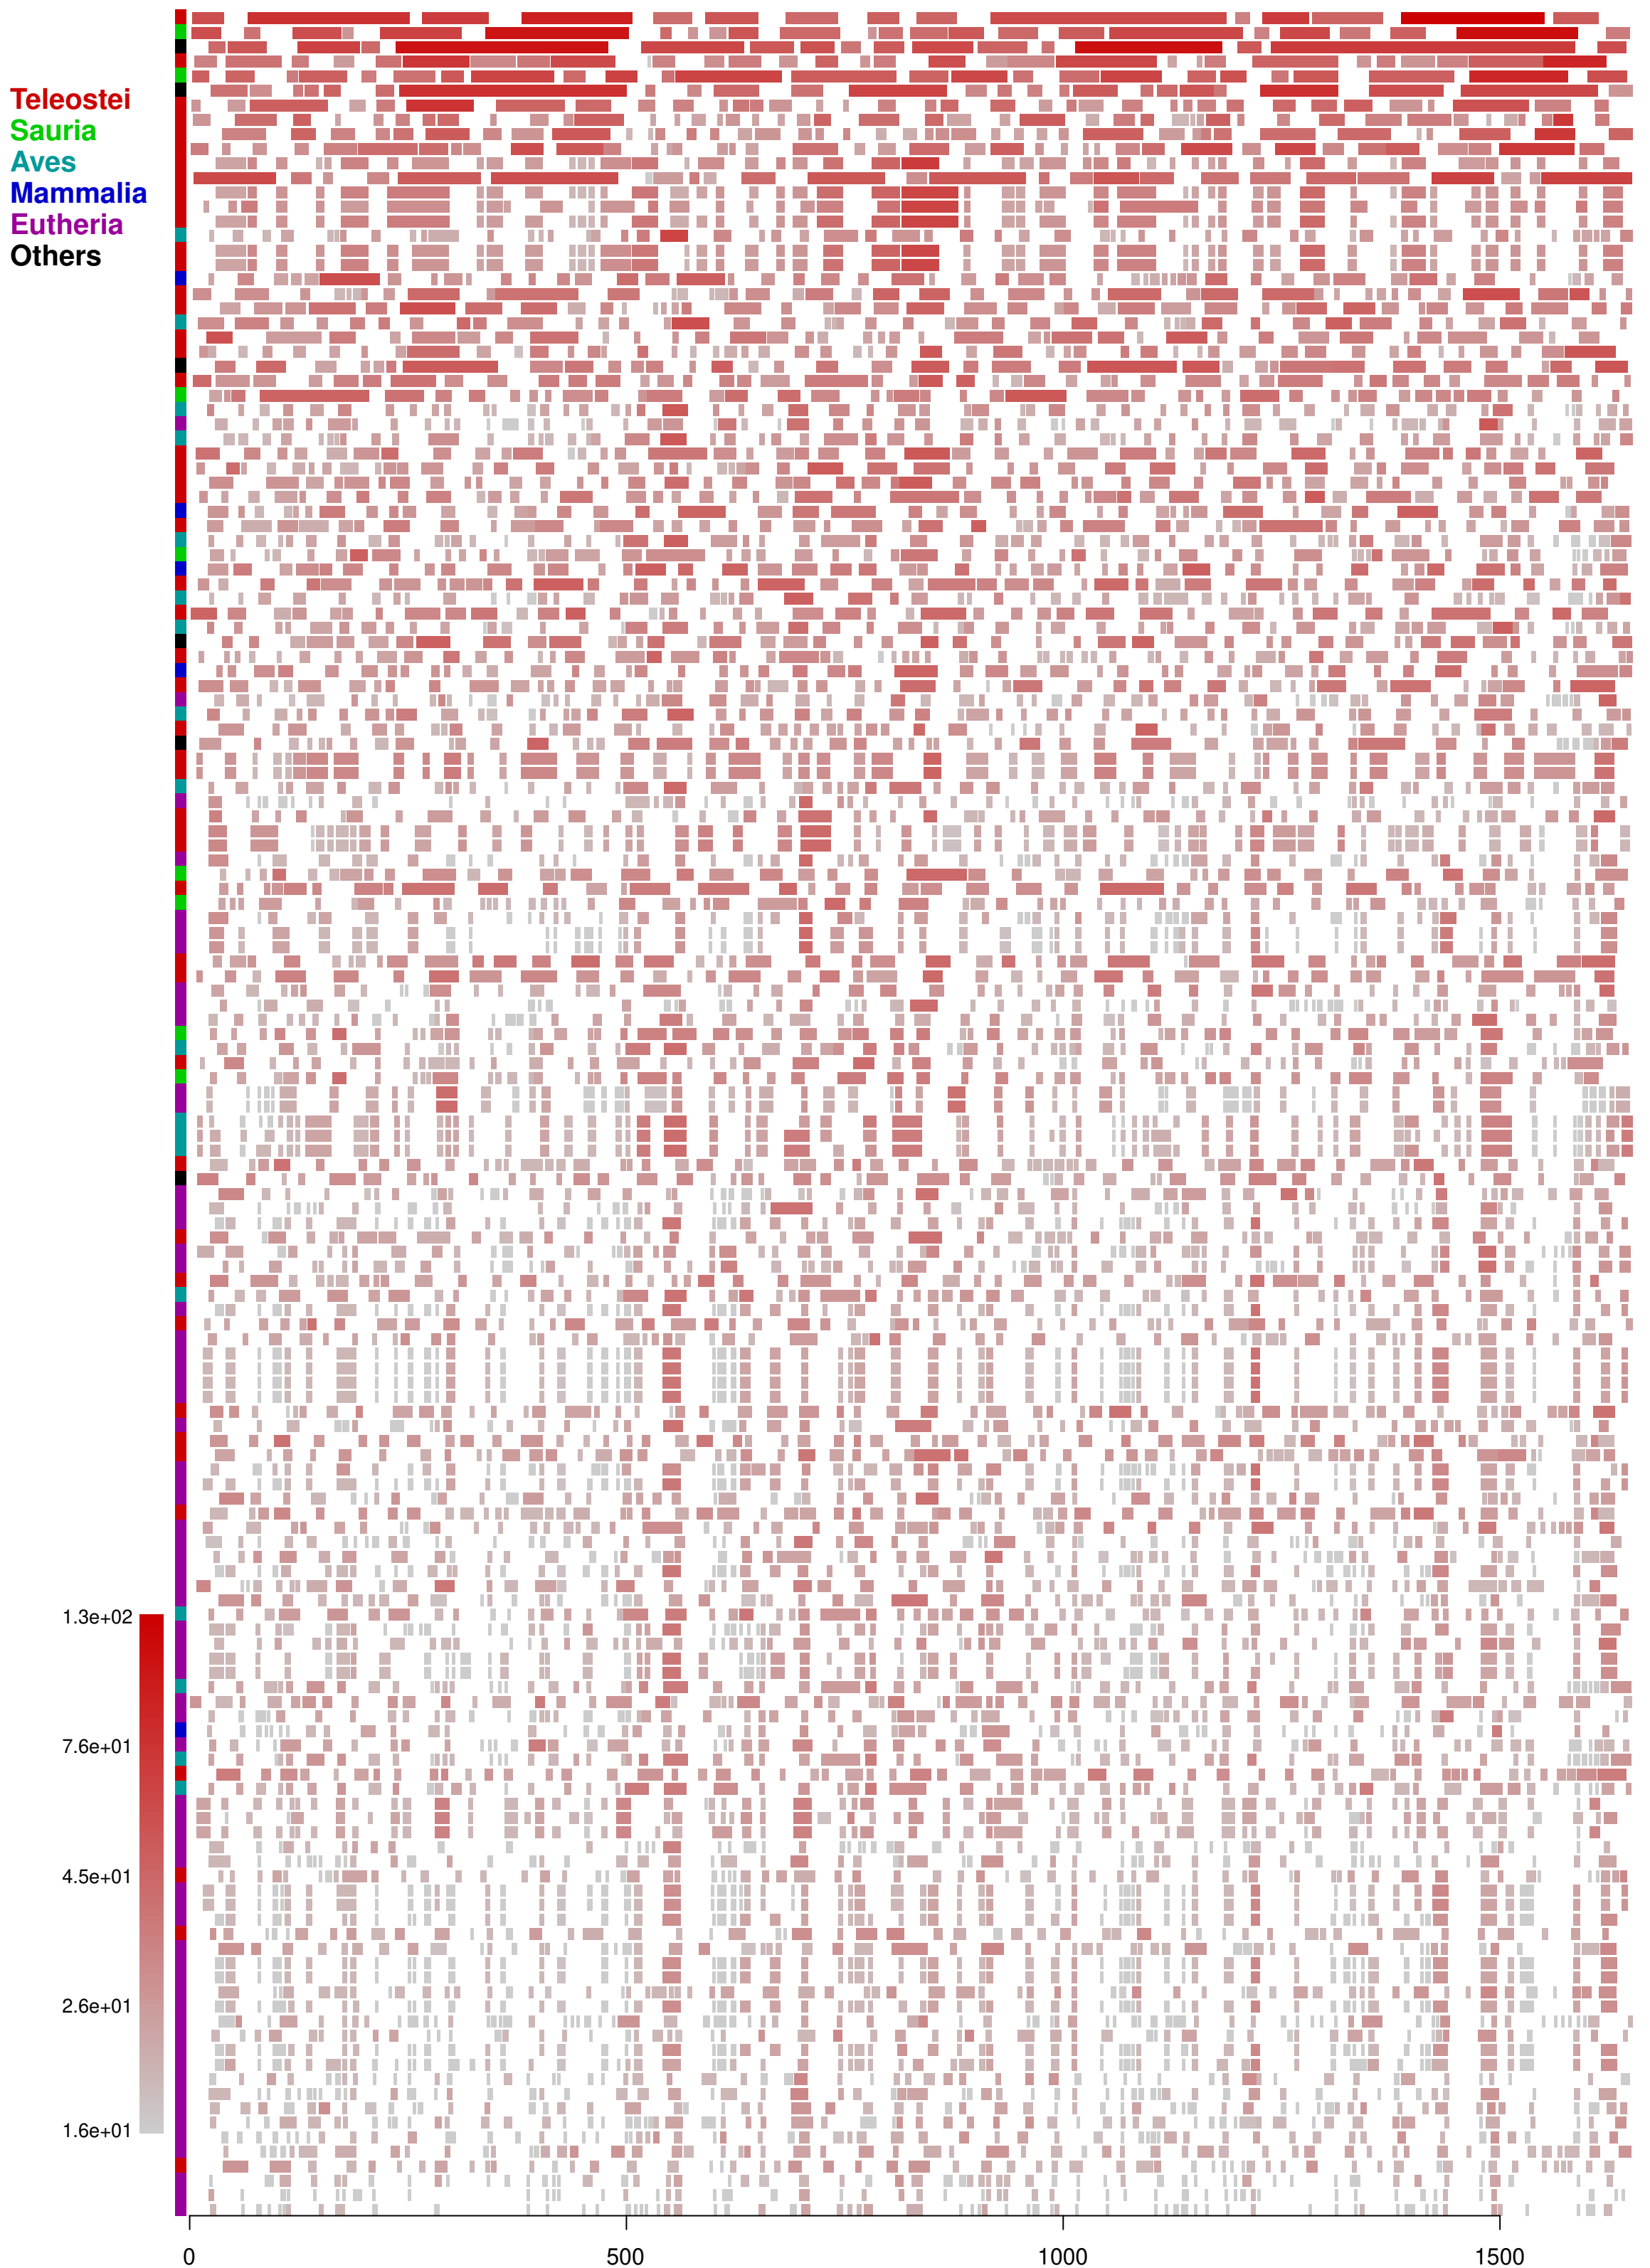

1.3e+02

7.6e+01

4.5e+01

2.6e+01

1.6e+01

0

500

1000

1500

0 alignments above max size (1.0e+08)

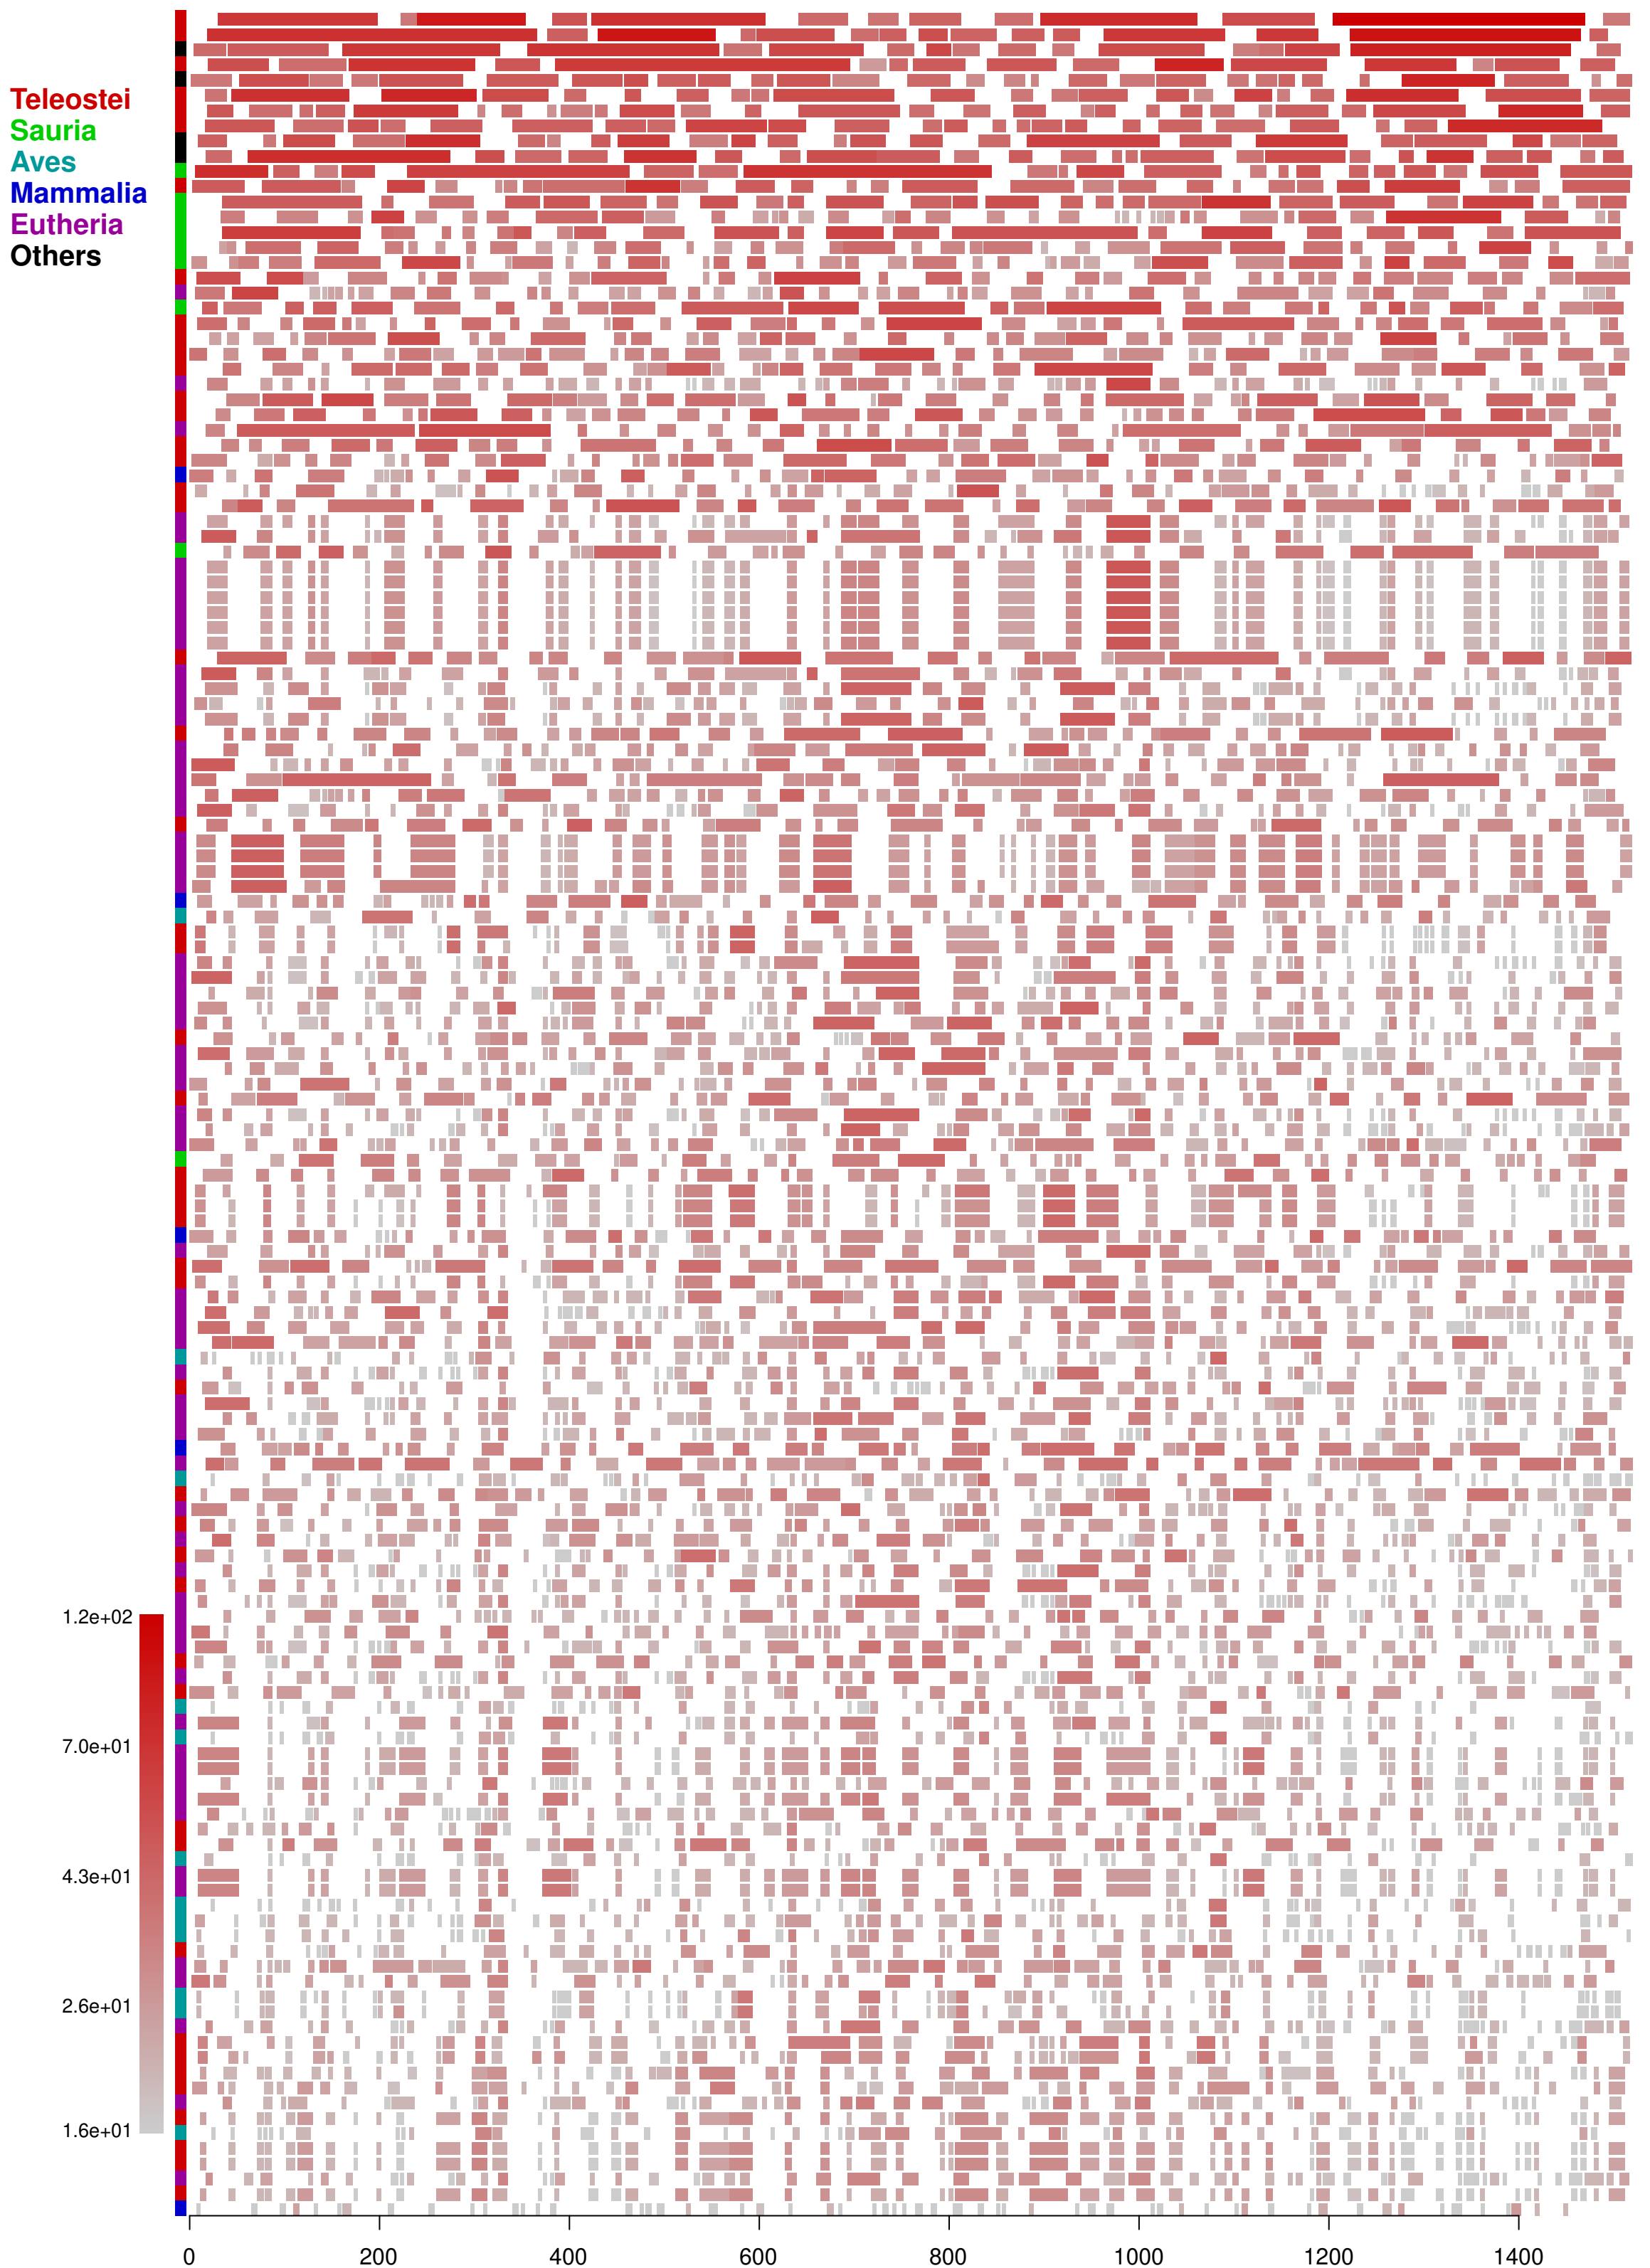

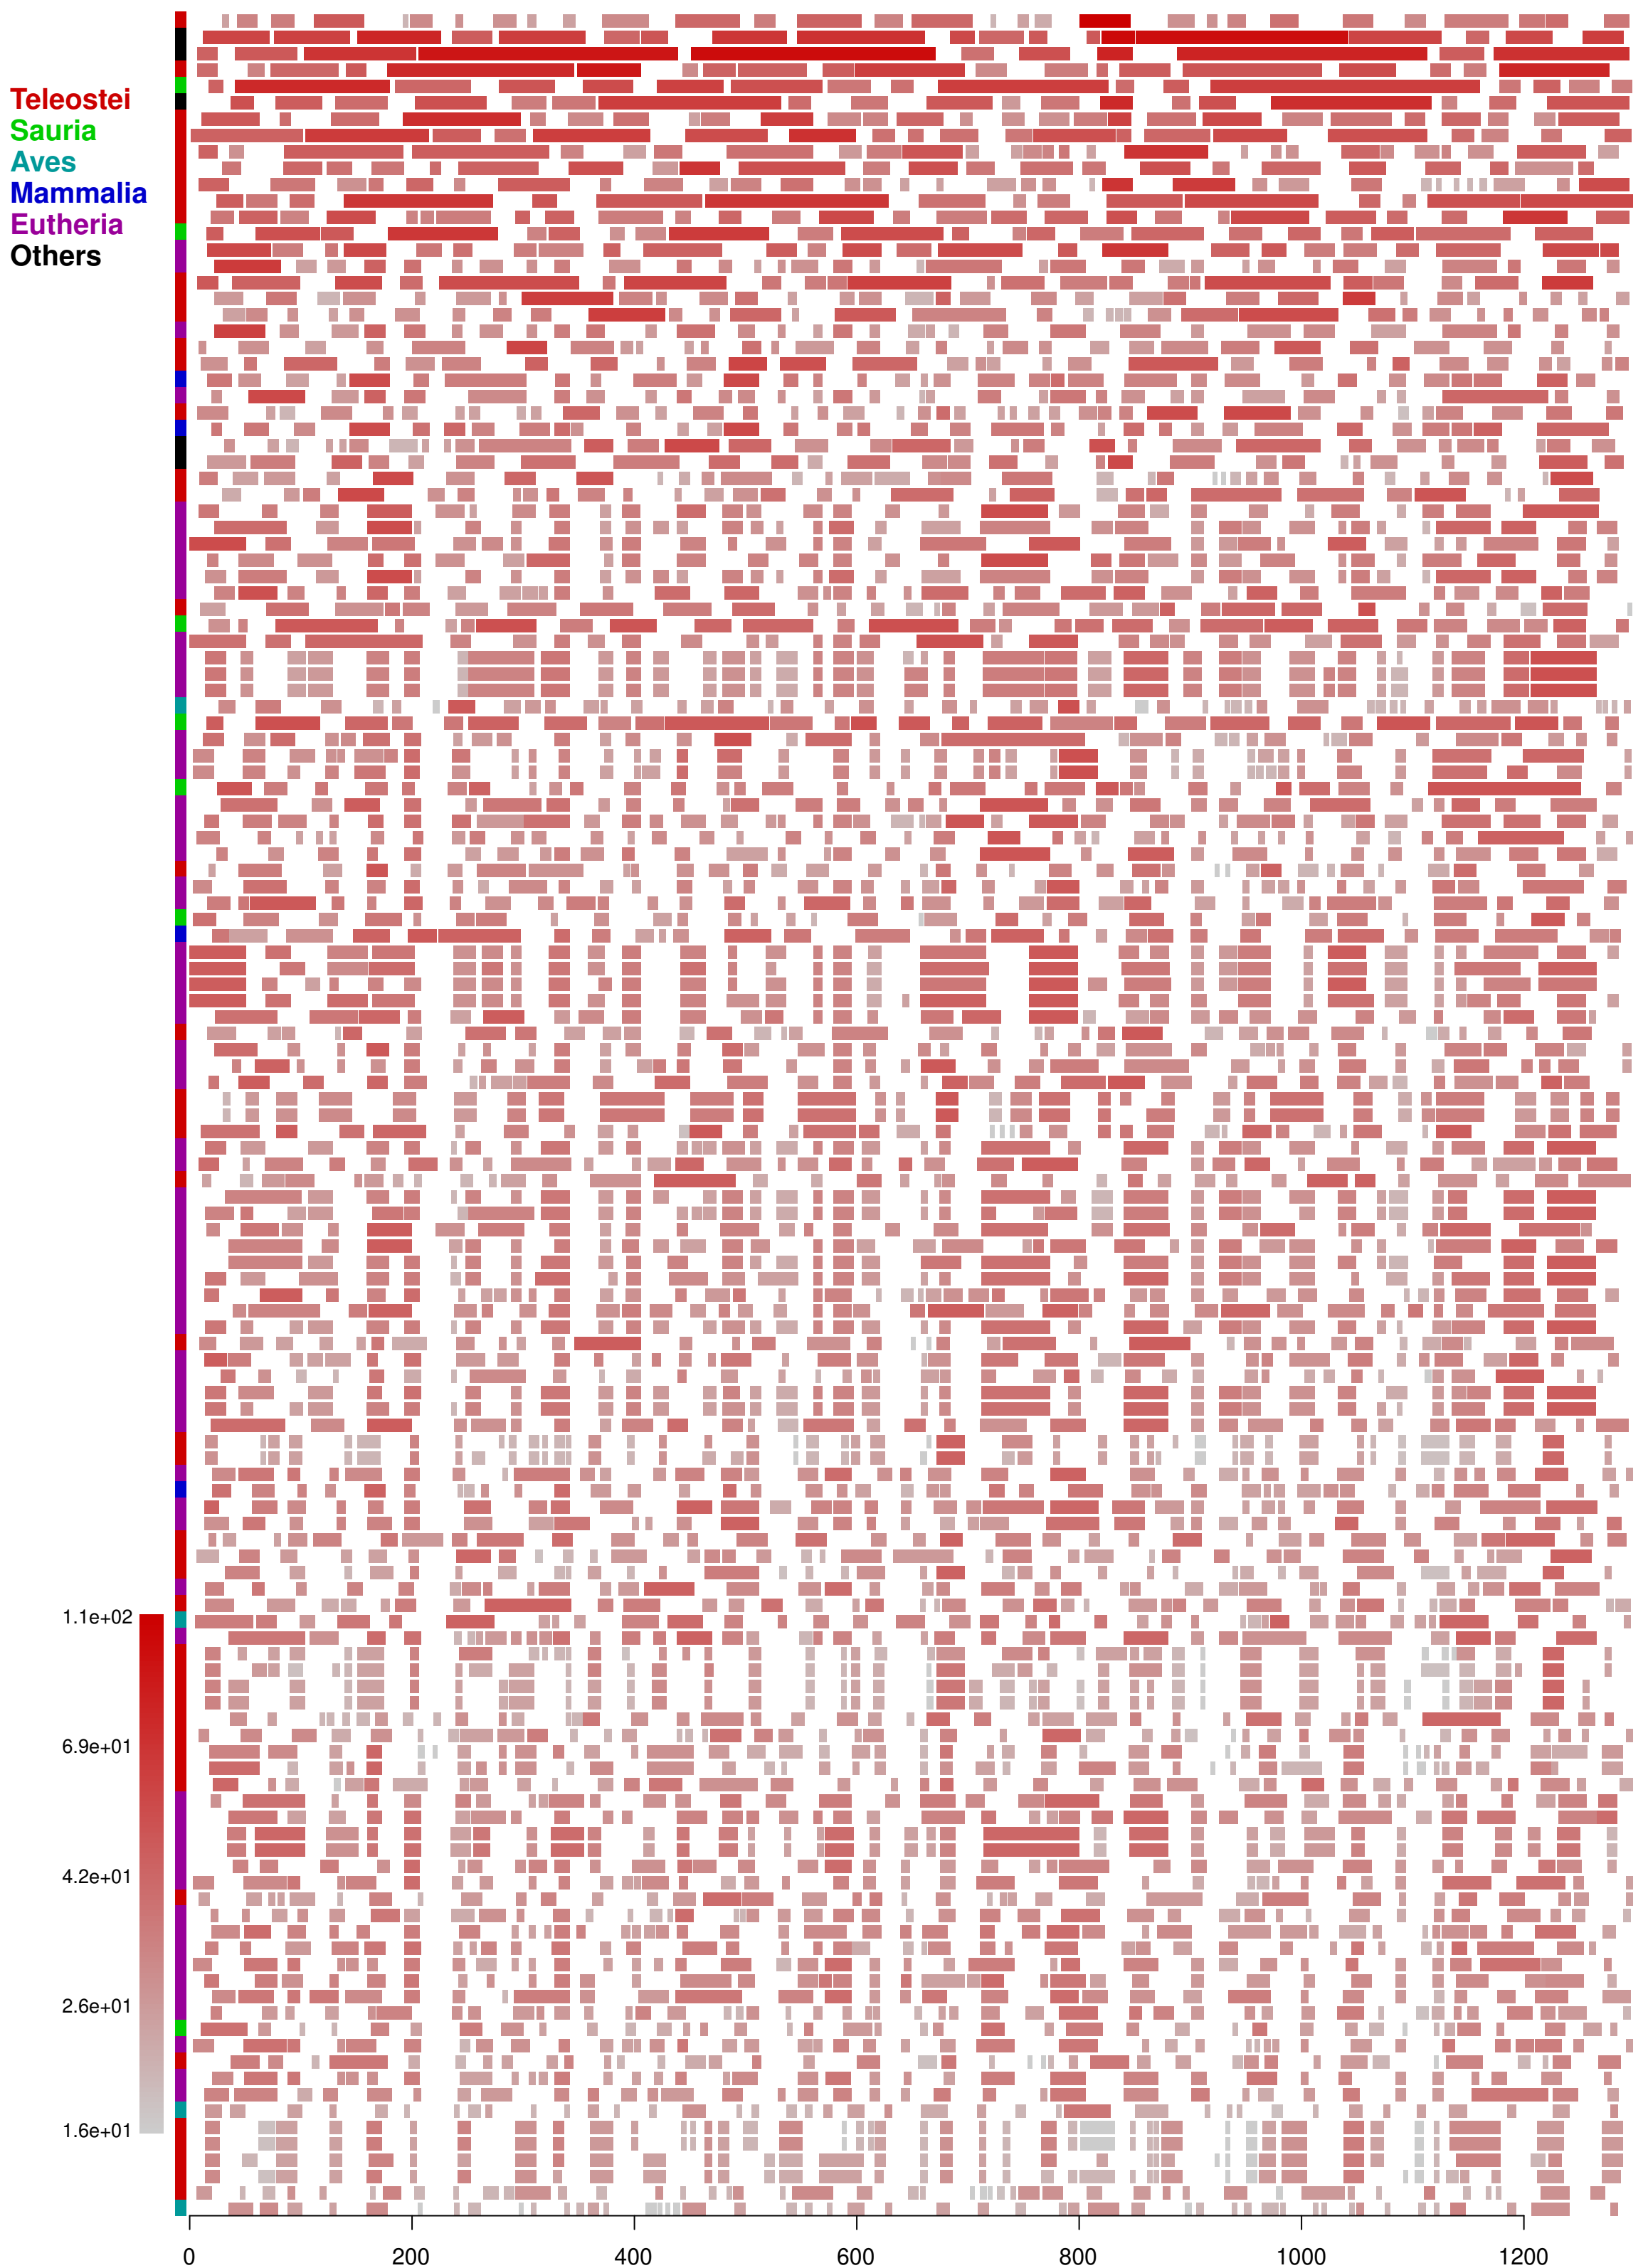

0 alignments above max size (1.0e+08)

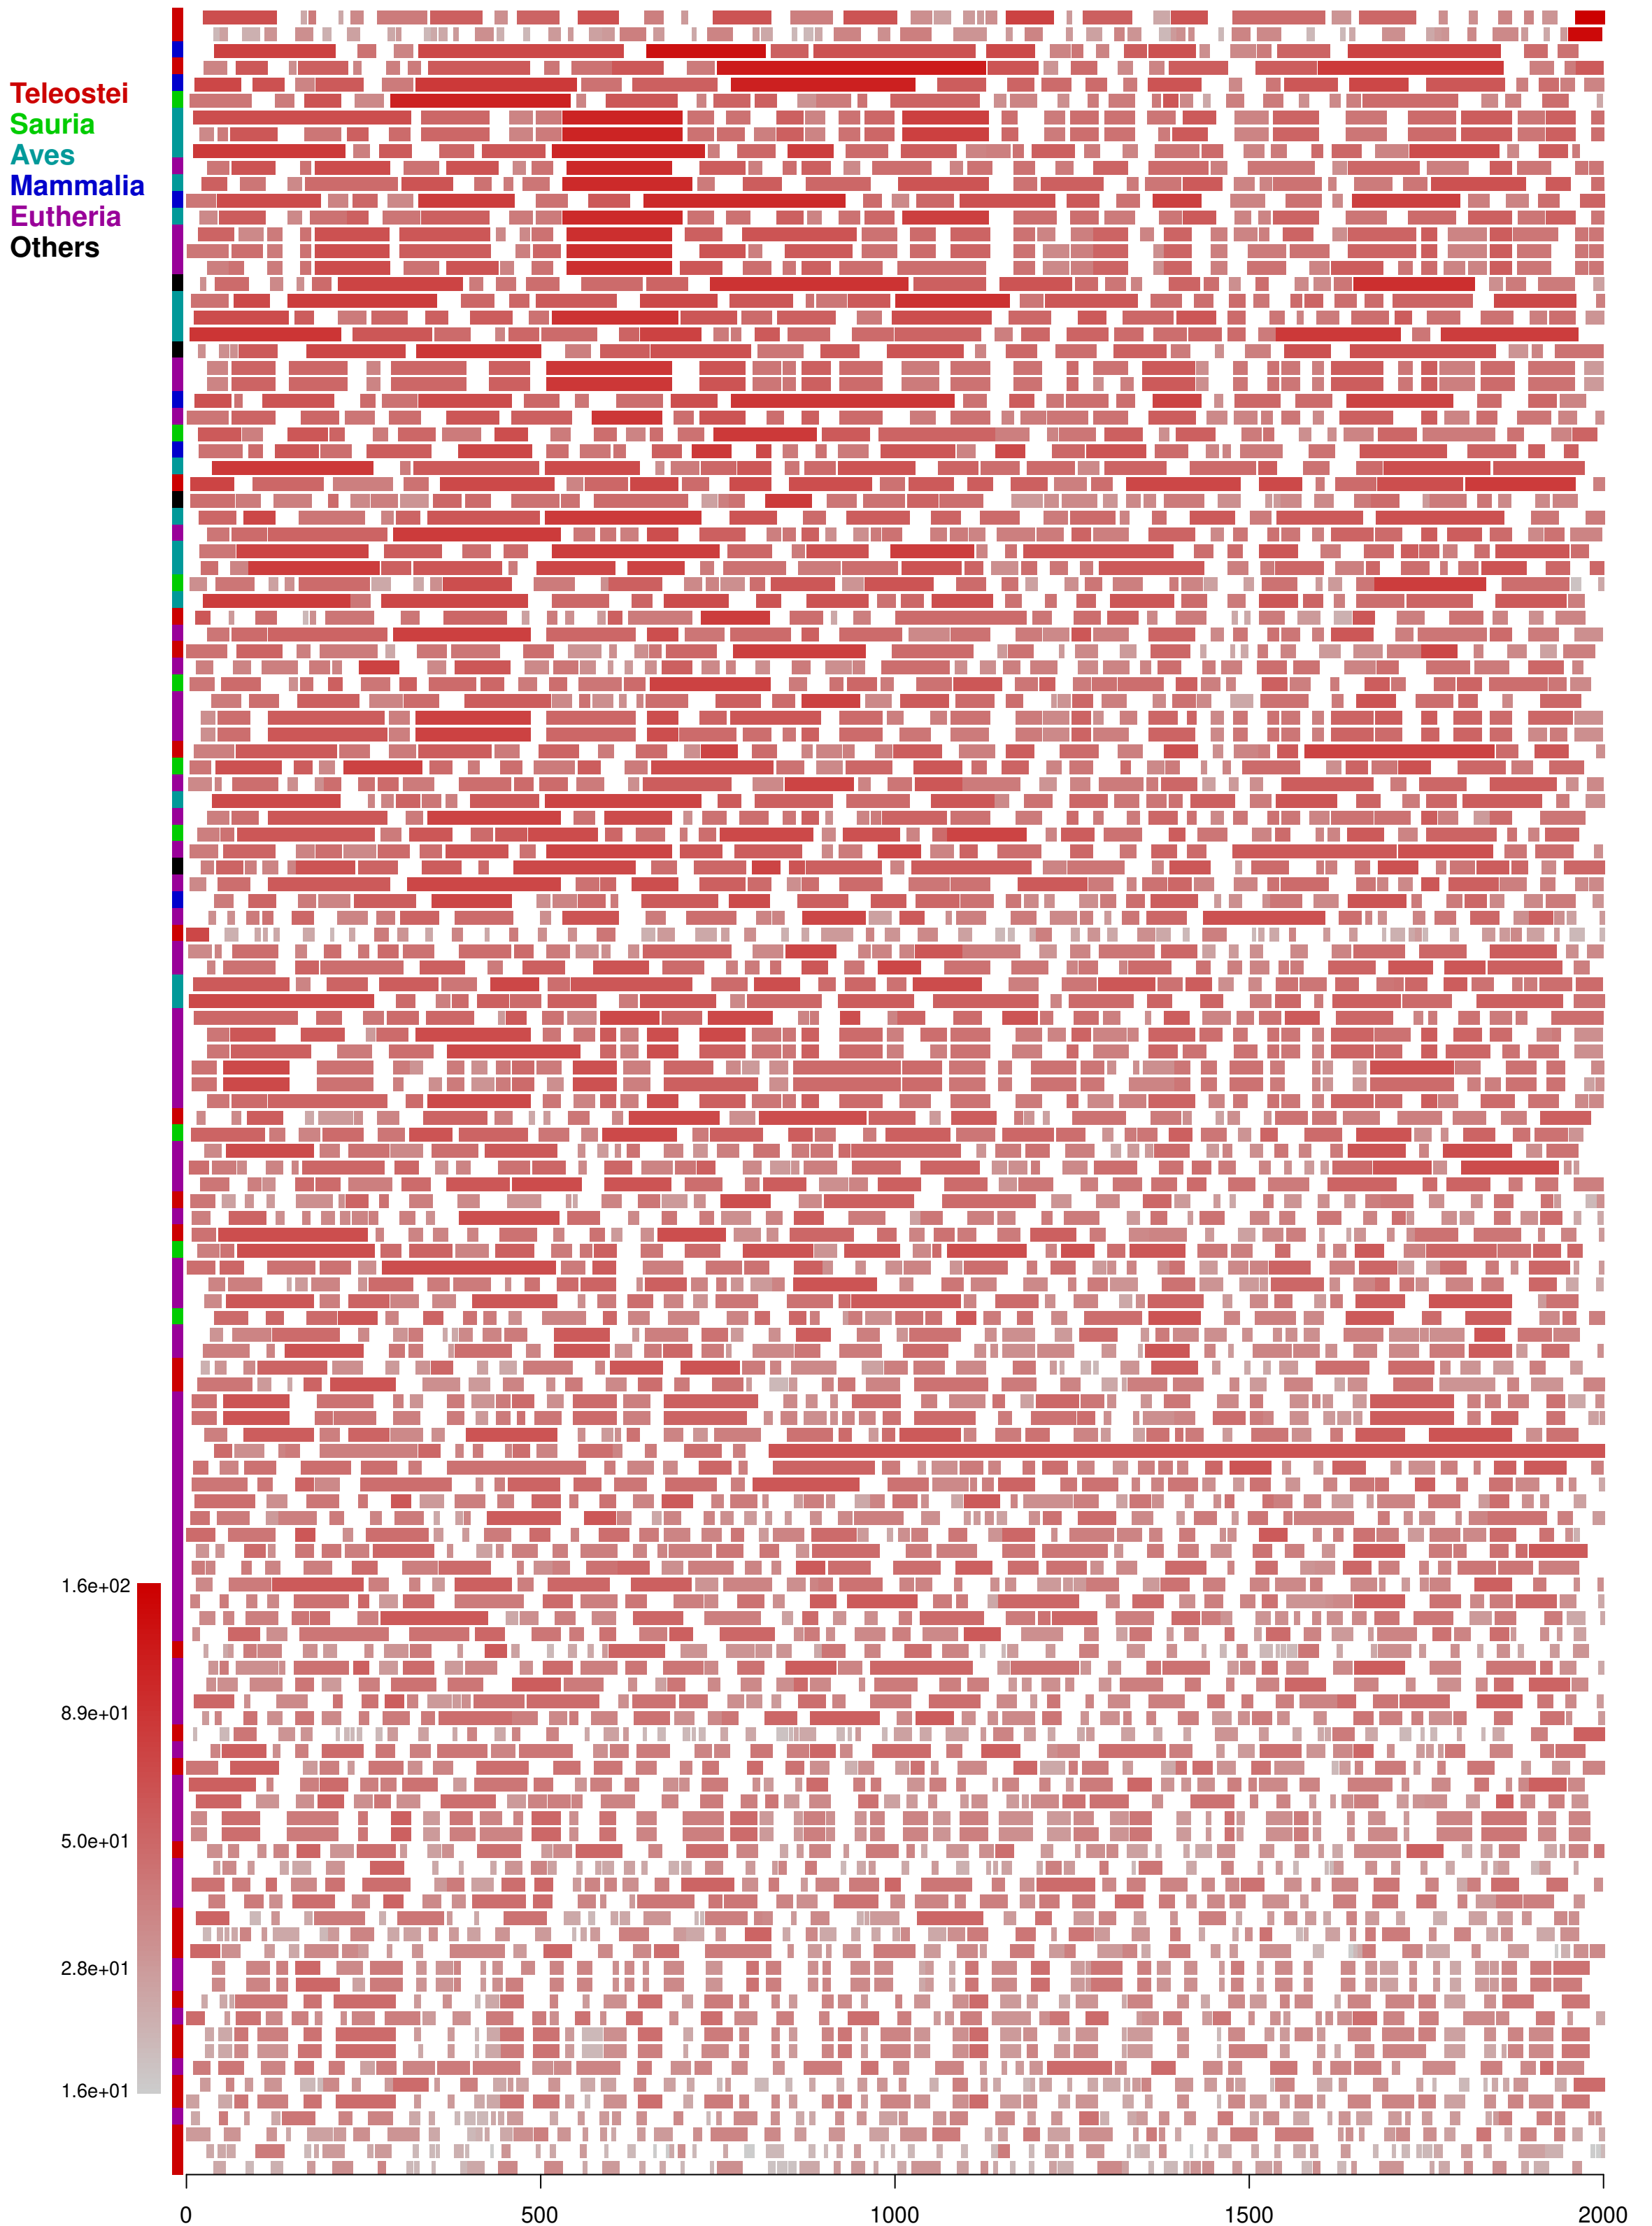

0 alignments above max size (1.0e+08)

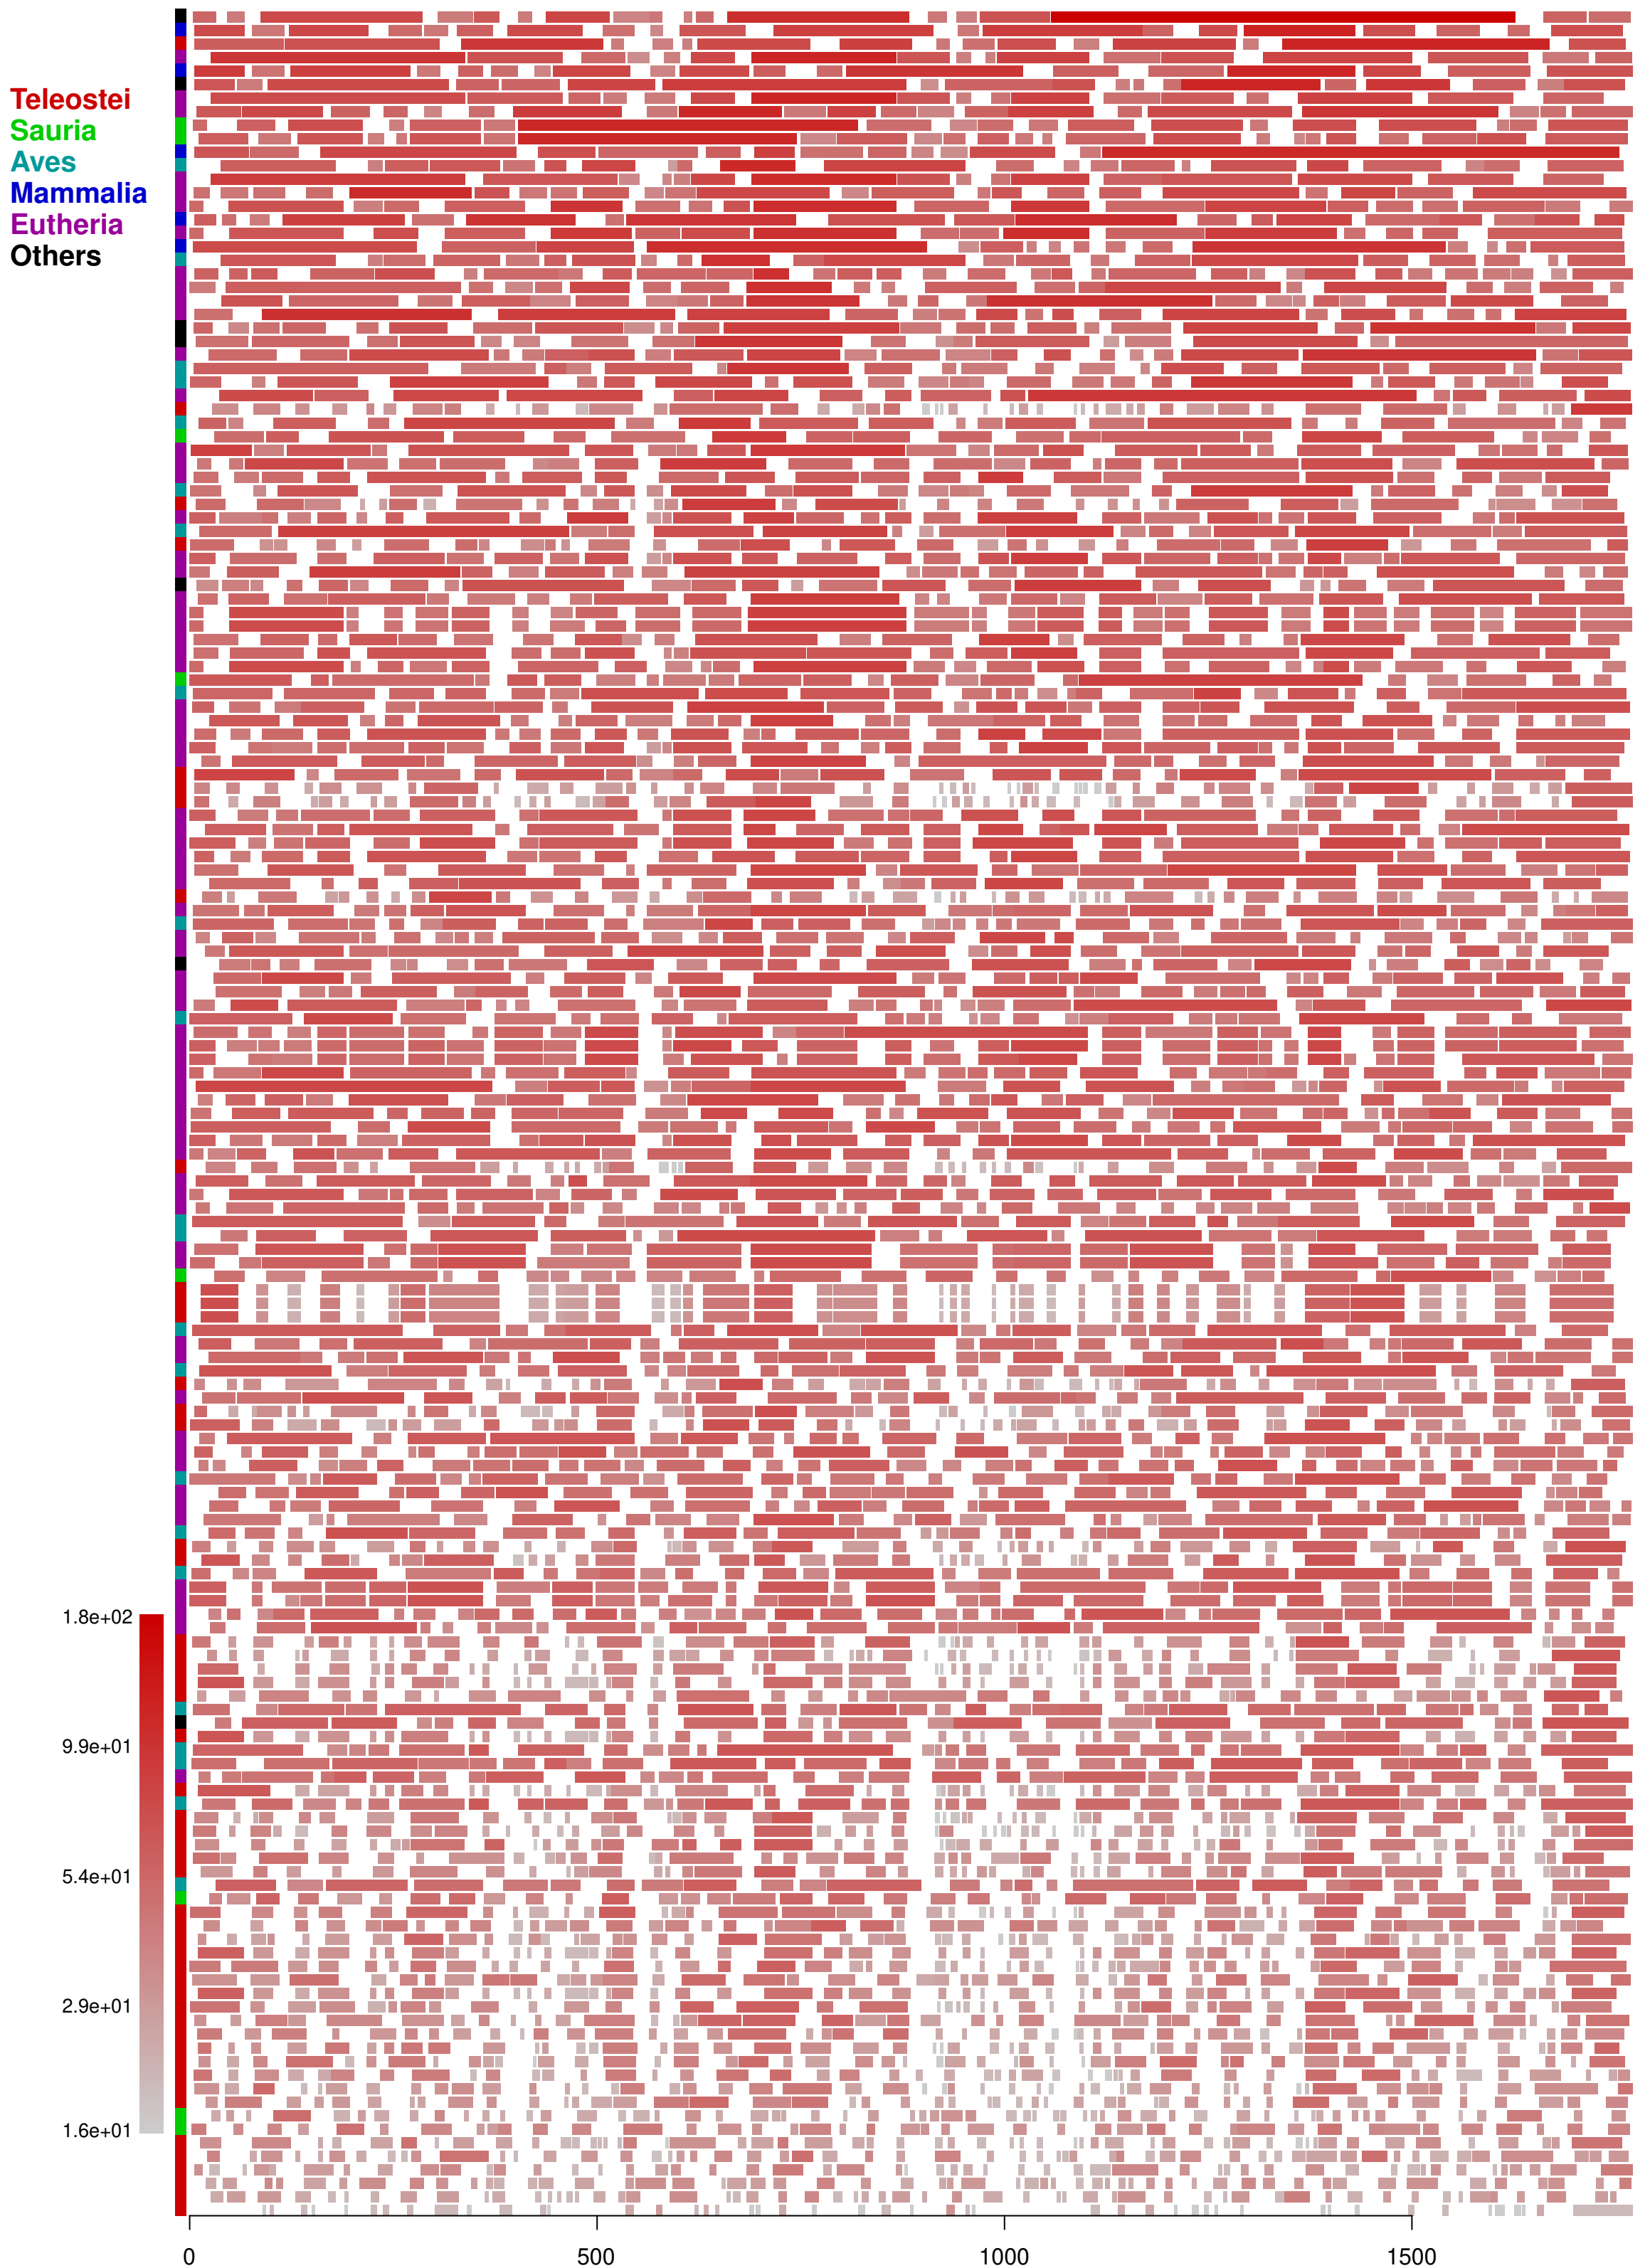

0 alignments above max size (1.0e+08)

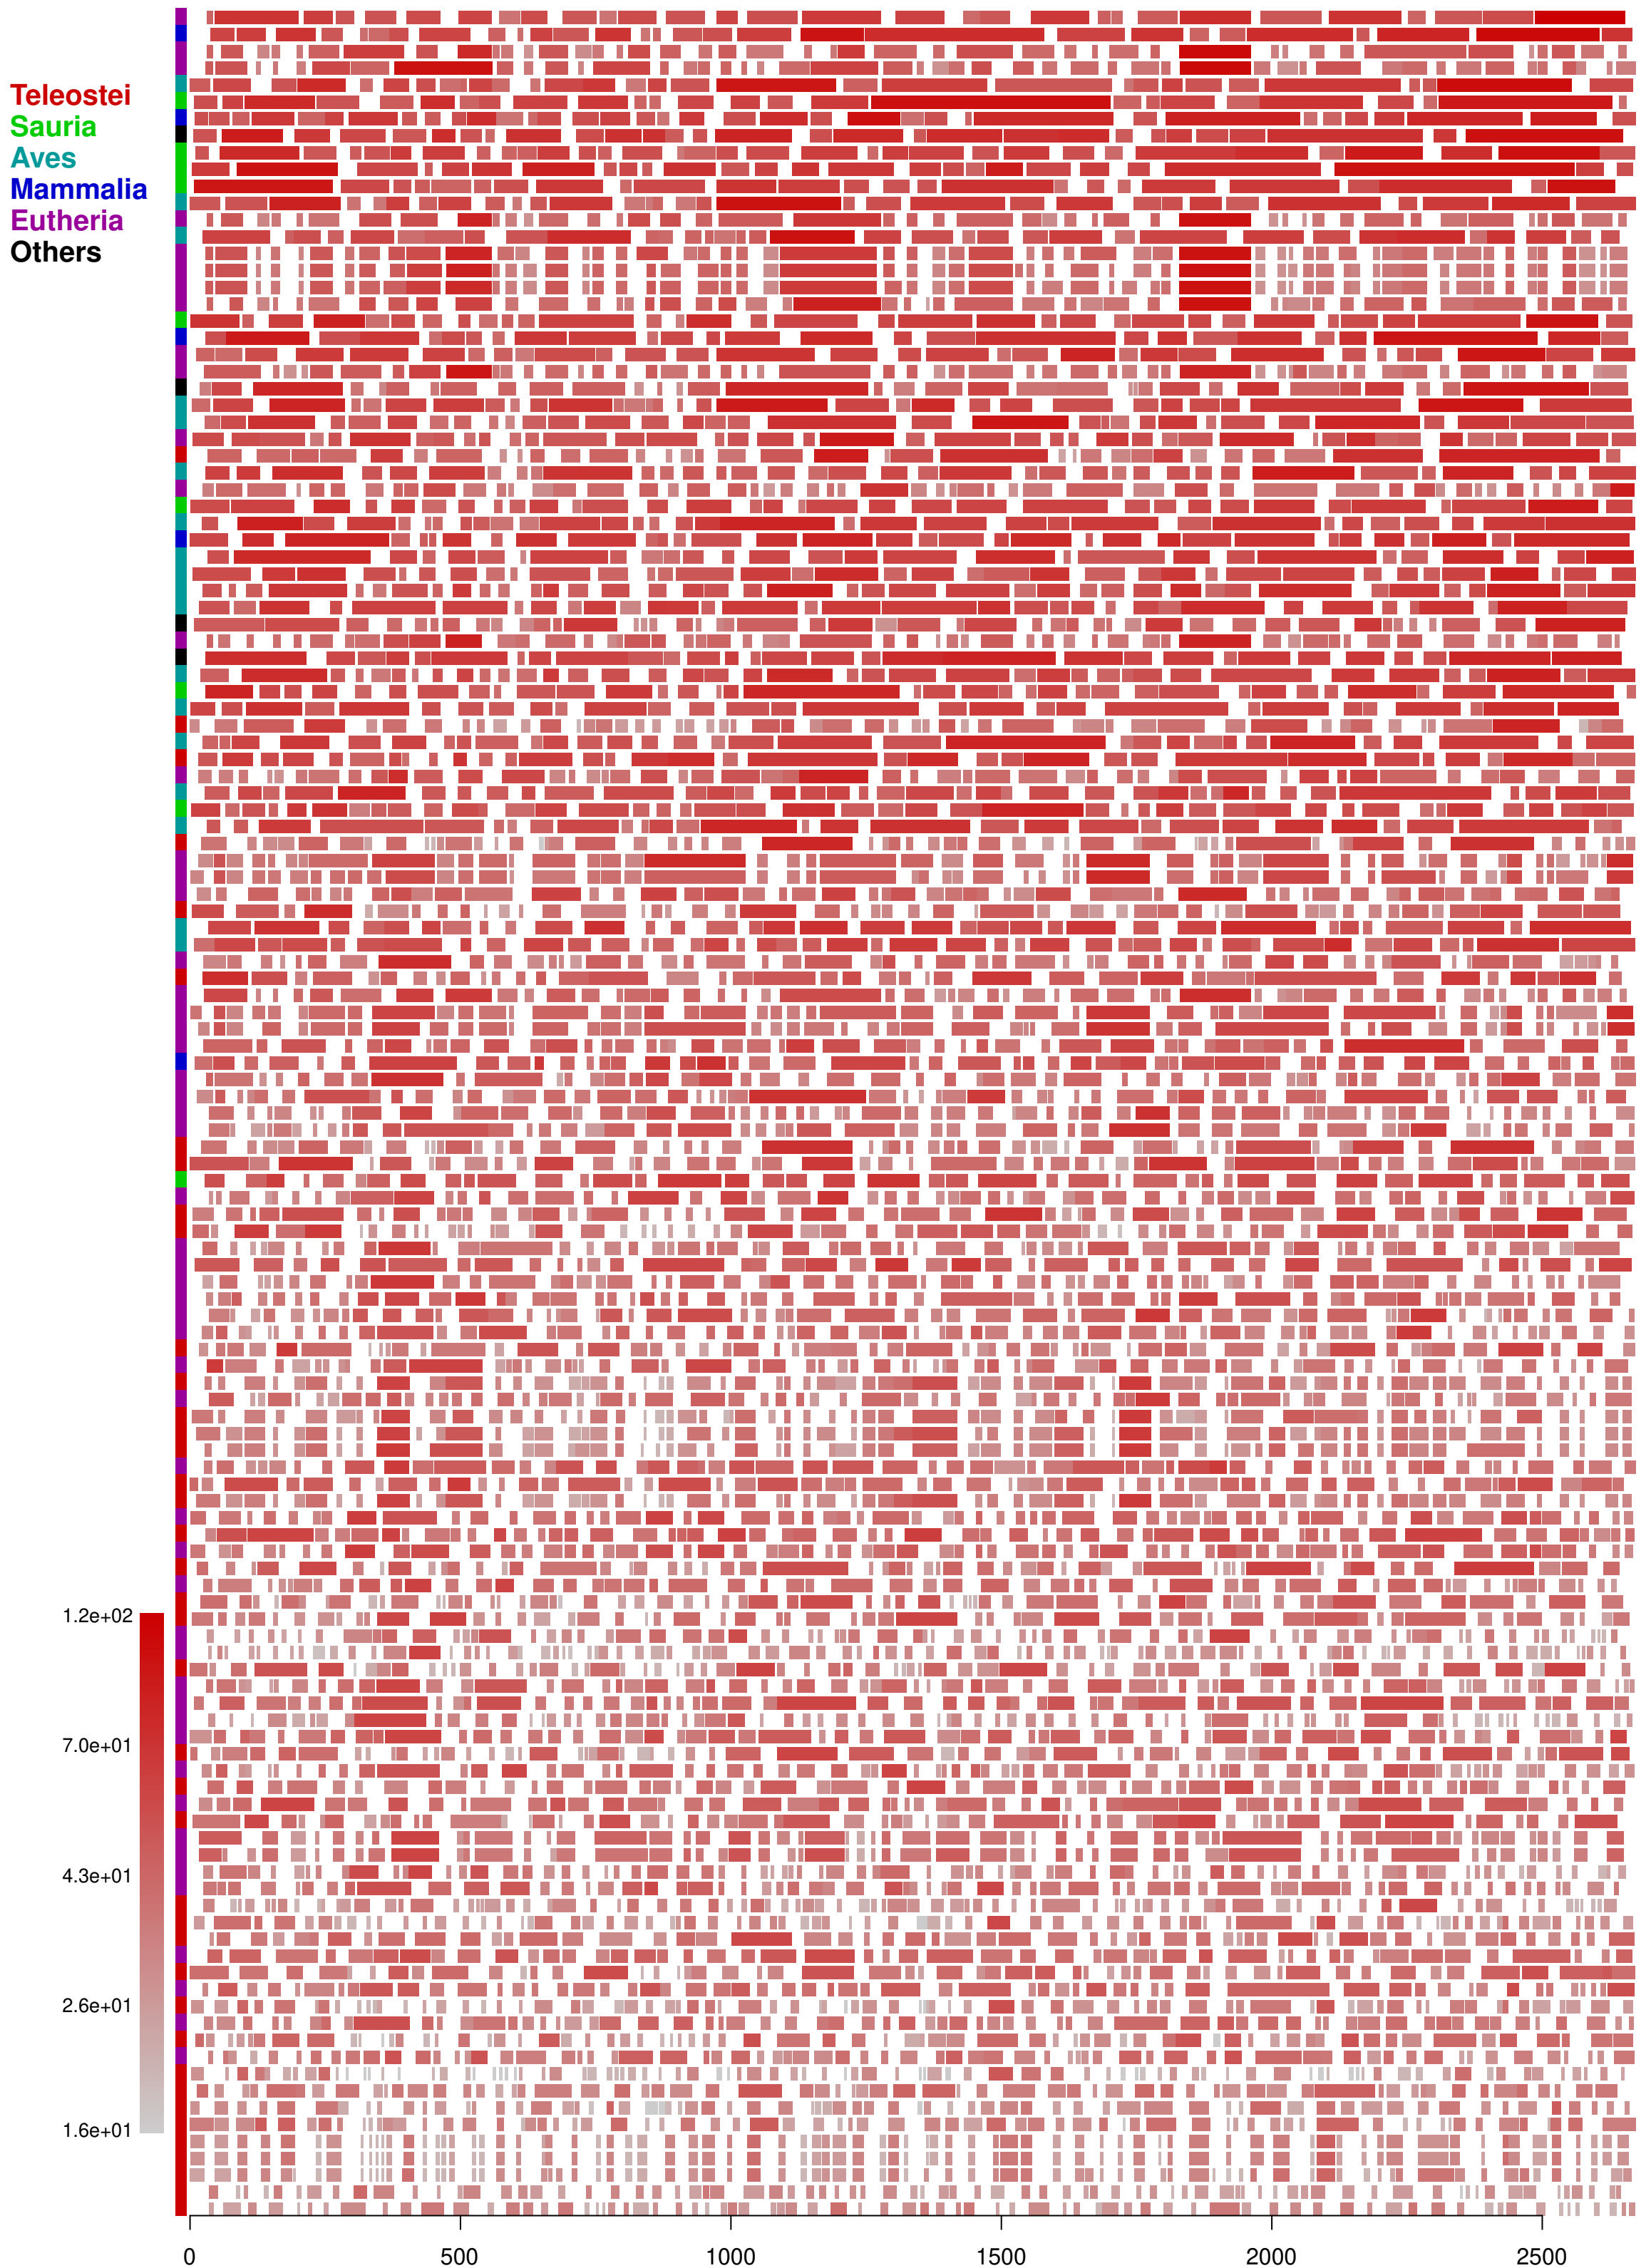

0 alignments above max size (1.0e+08)



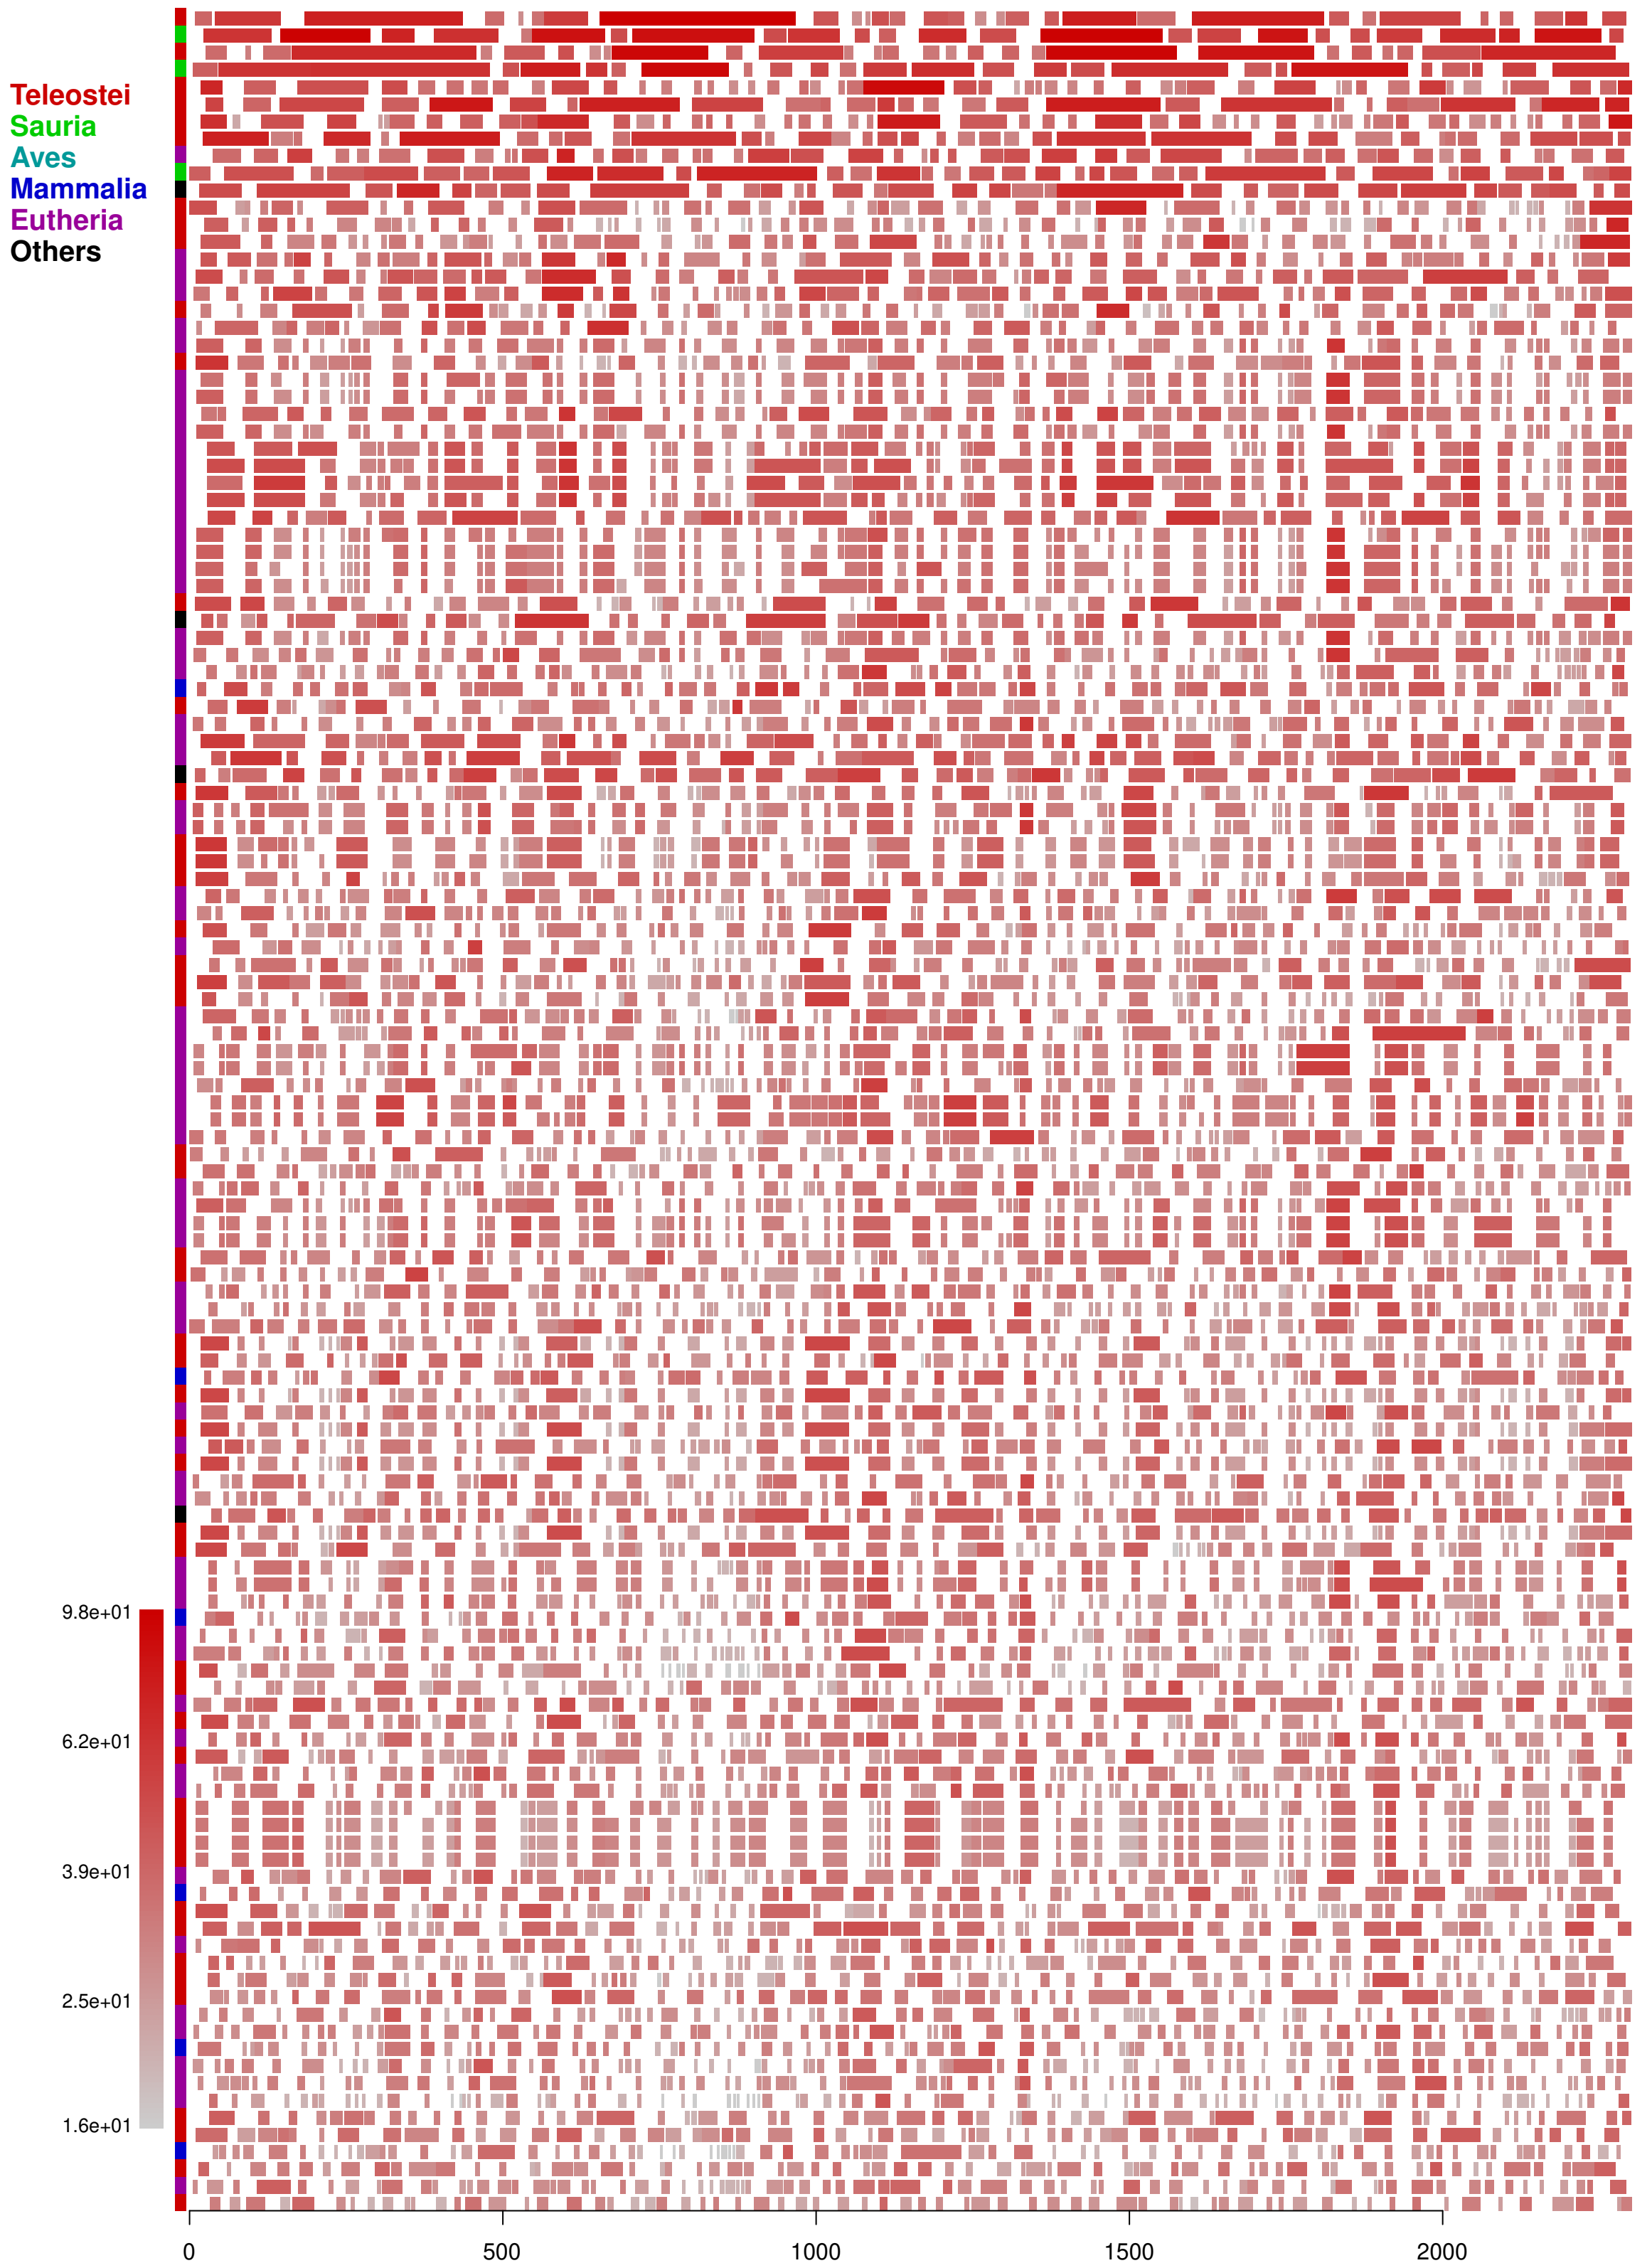

0 alignments above max size (1.0e+08)

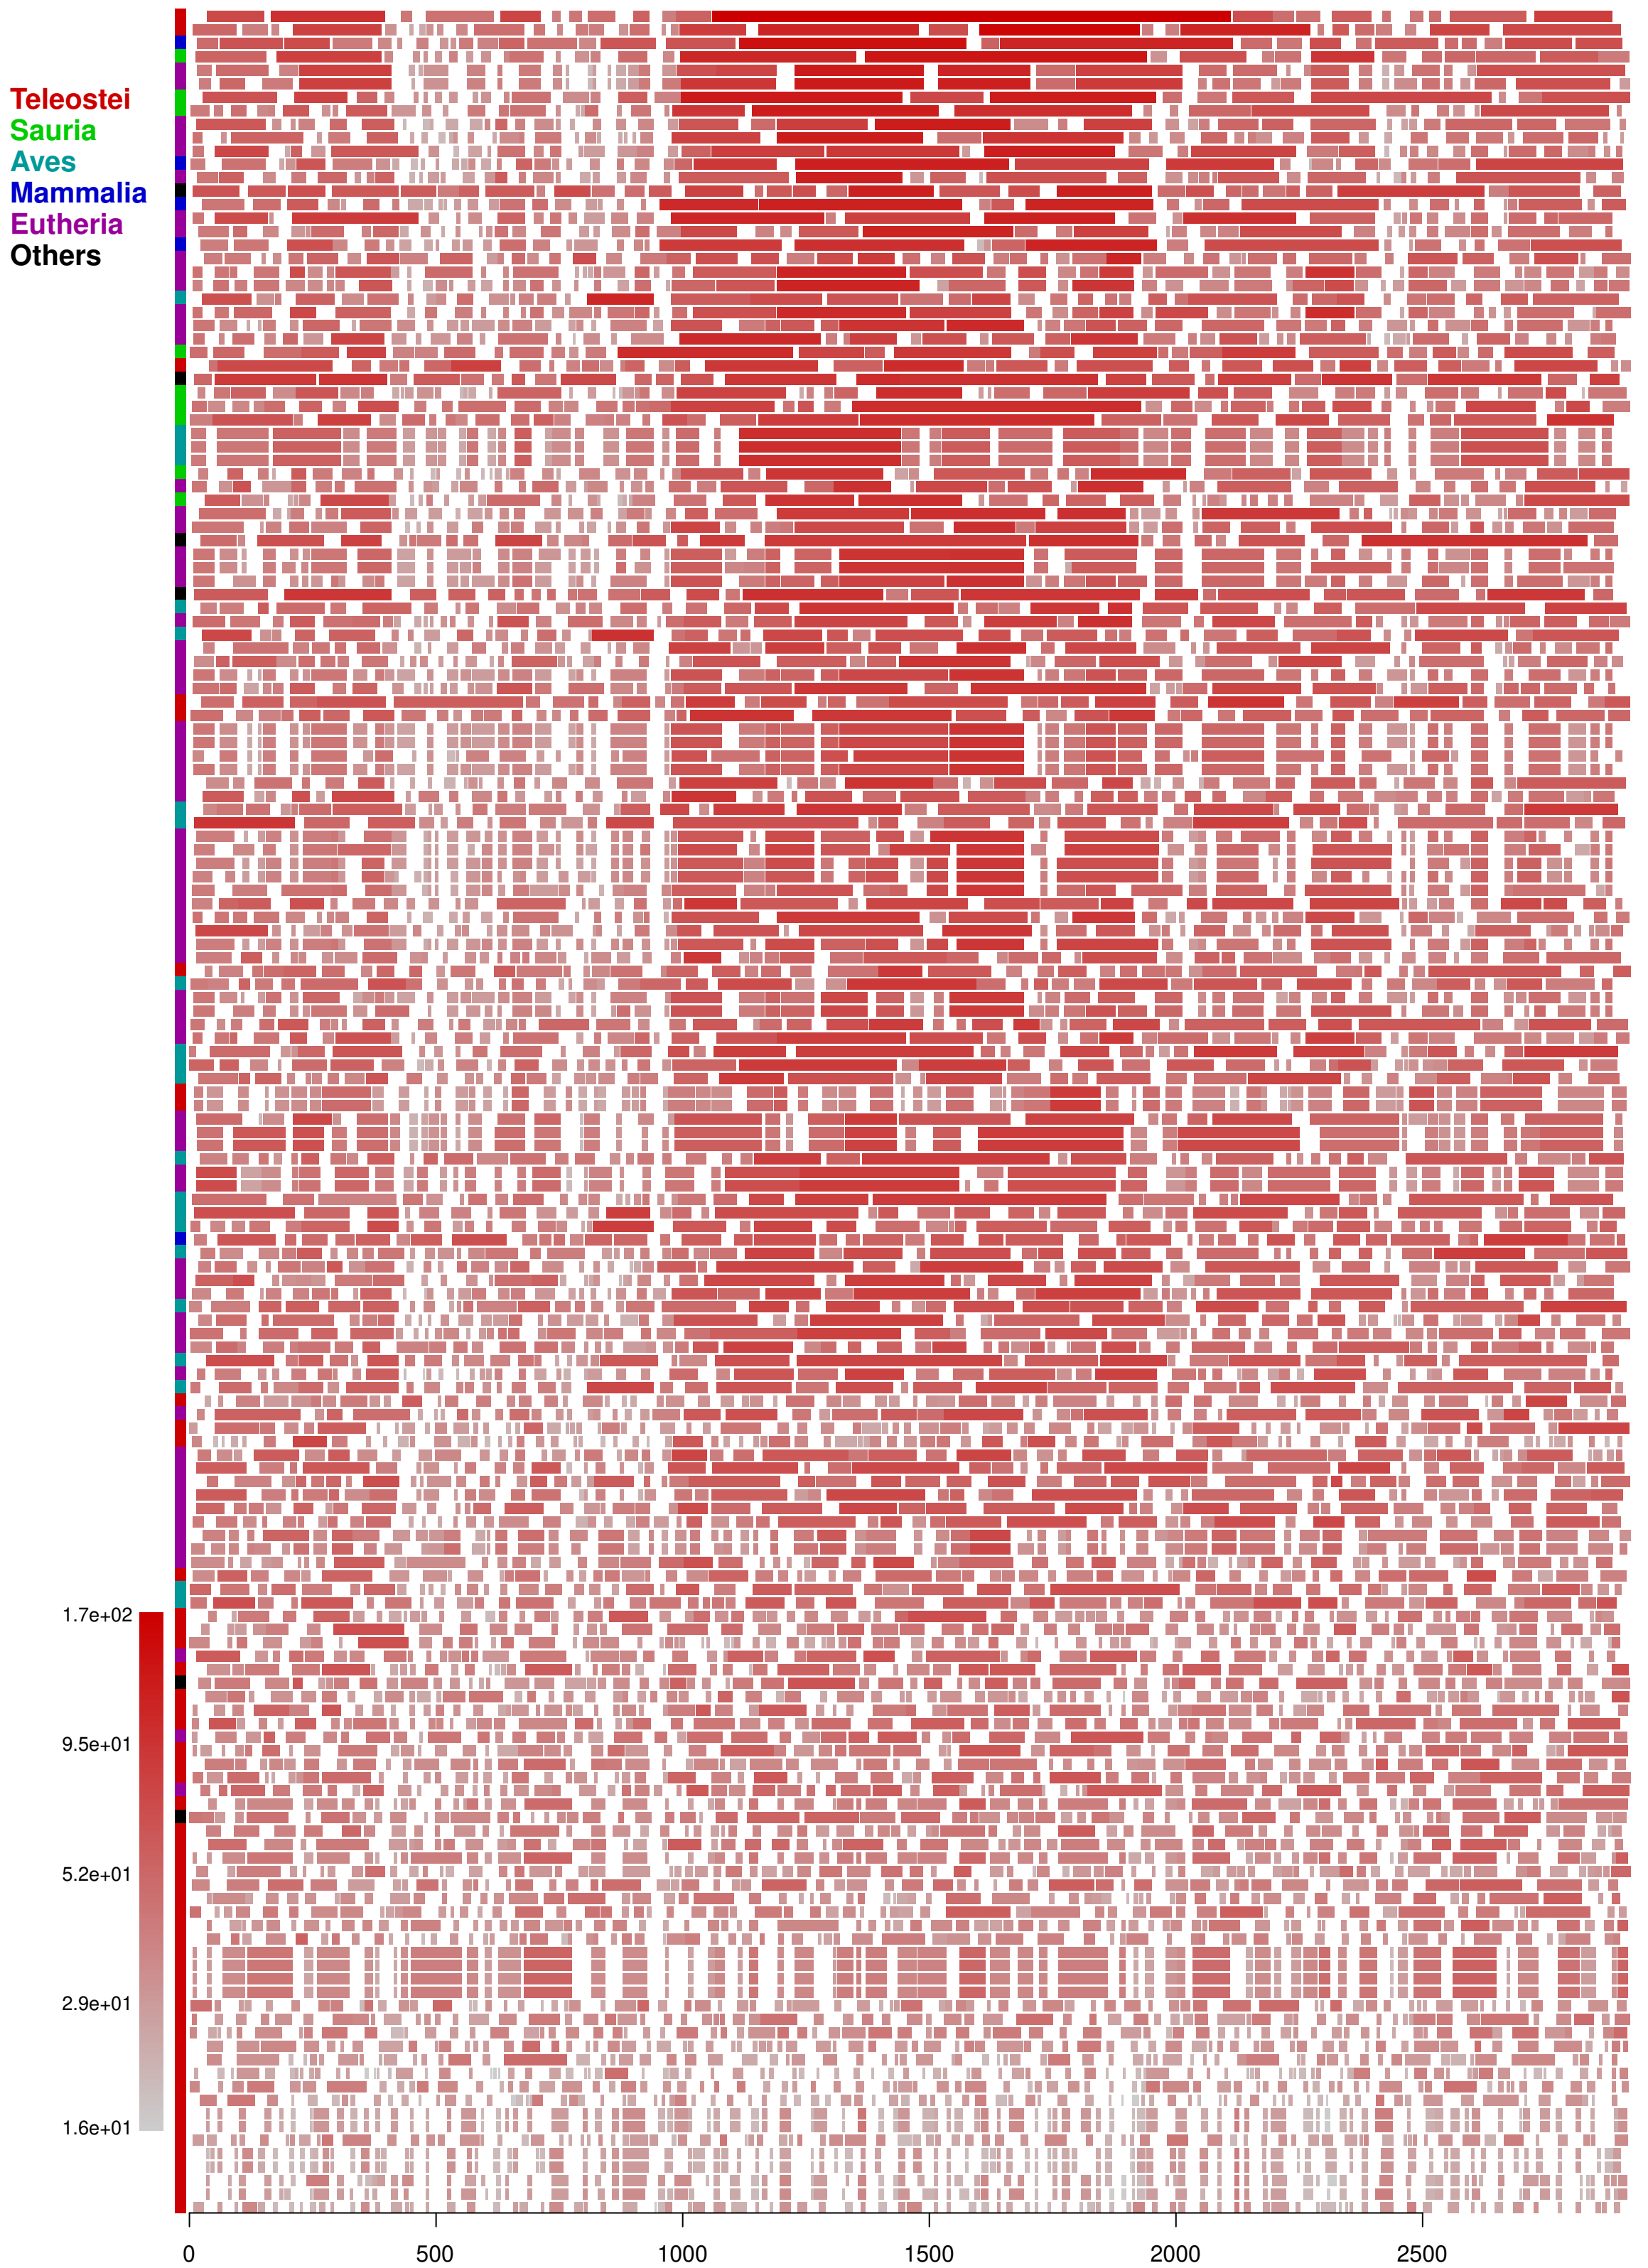

0 alignments above max size (1.0e+08)

Teleostei  
Sauria  
Aves  
Mammalia  
Eutheria  
Others

1.4e+02  
8.0e+01  
4.6e+01  
2.7e+01  
1.6e+01

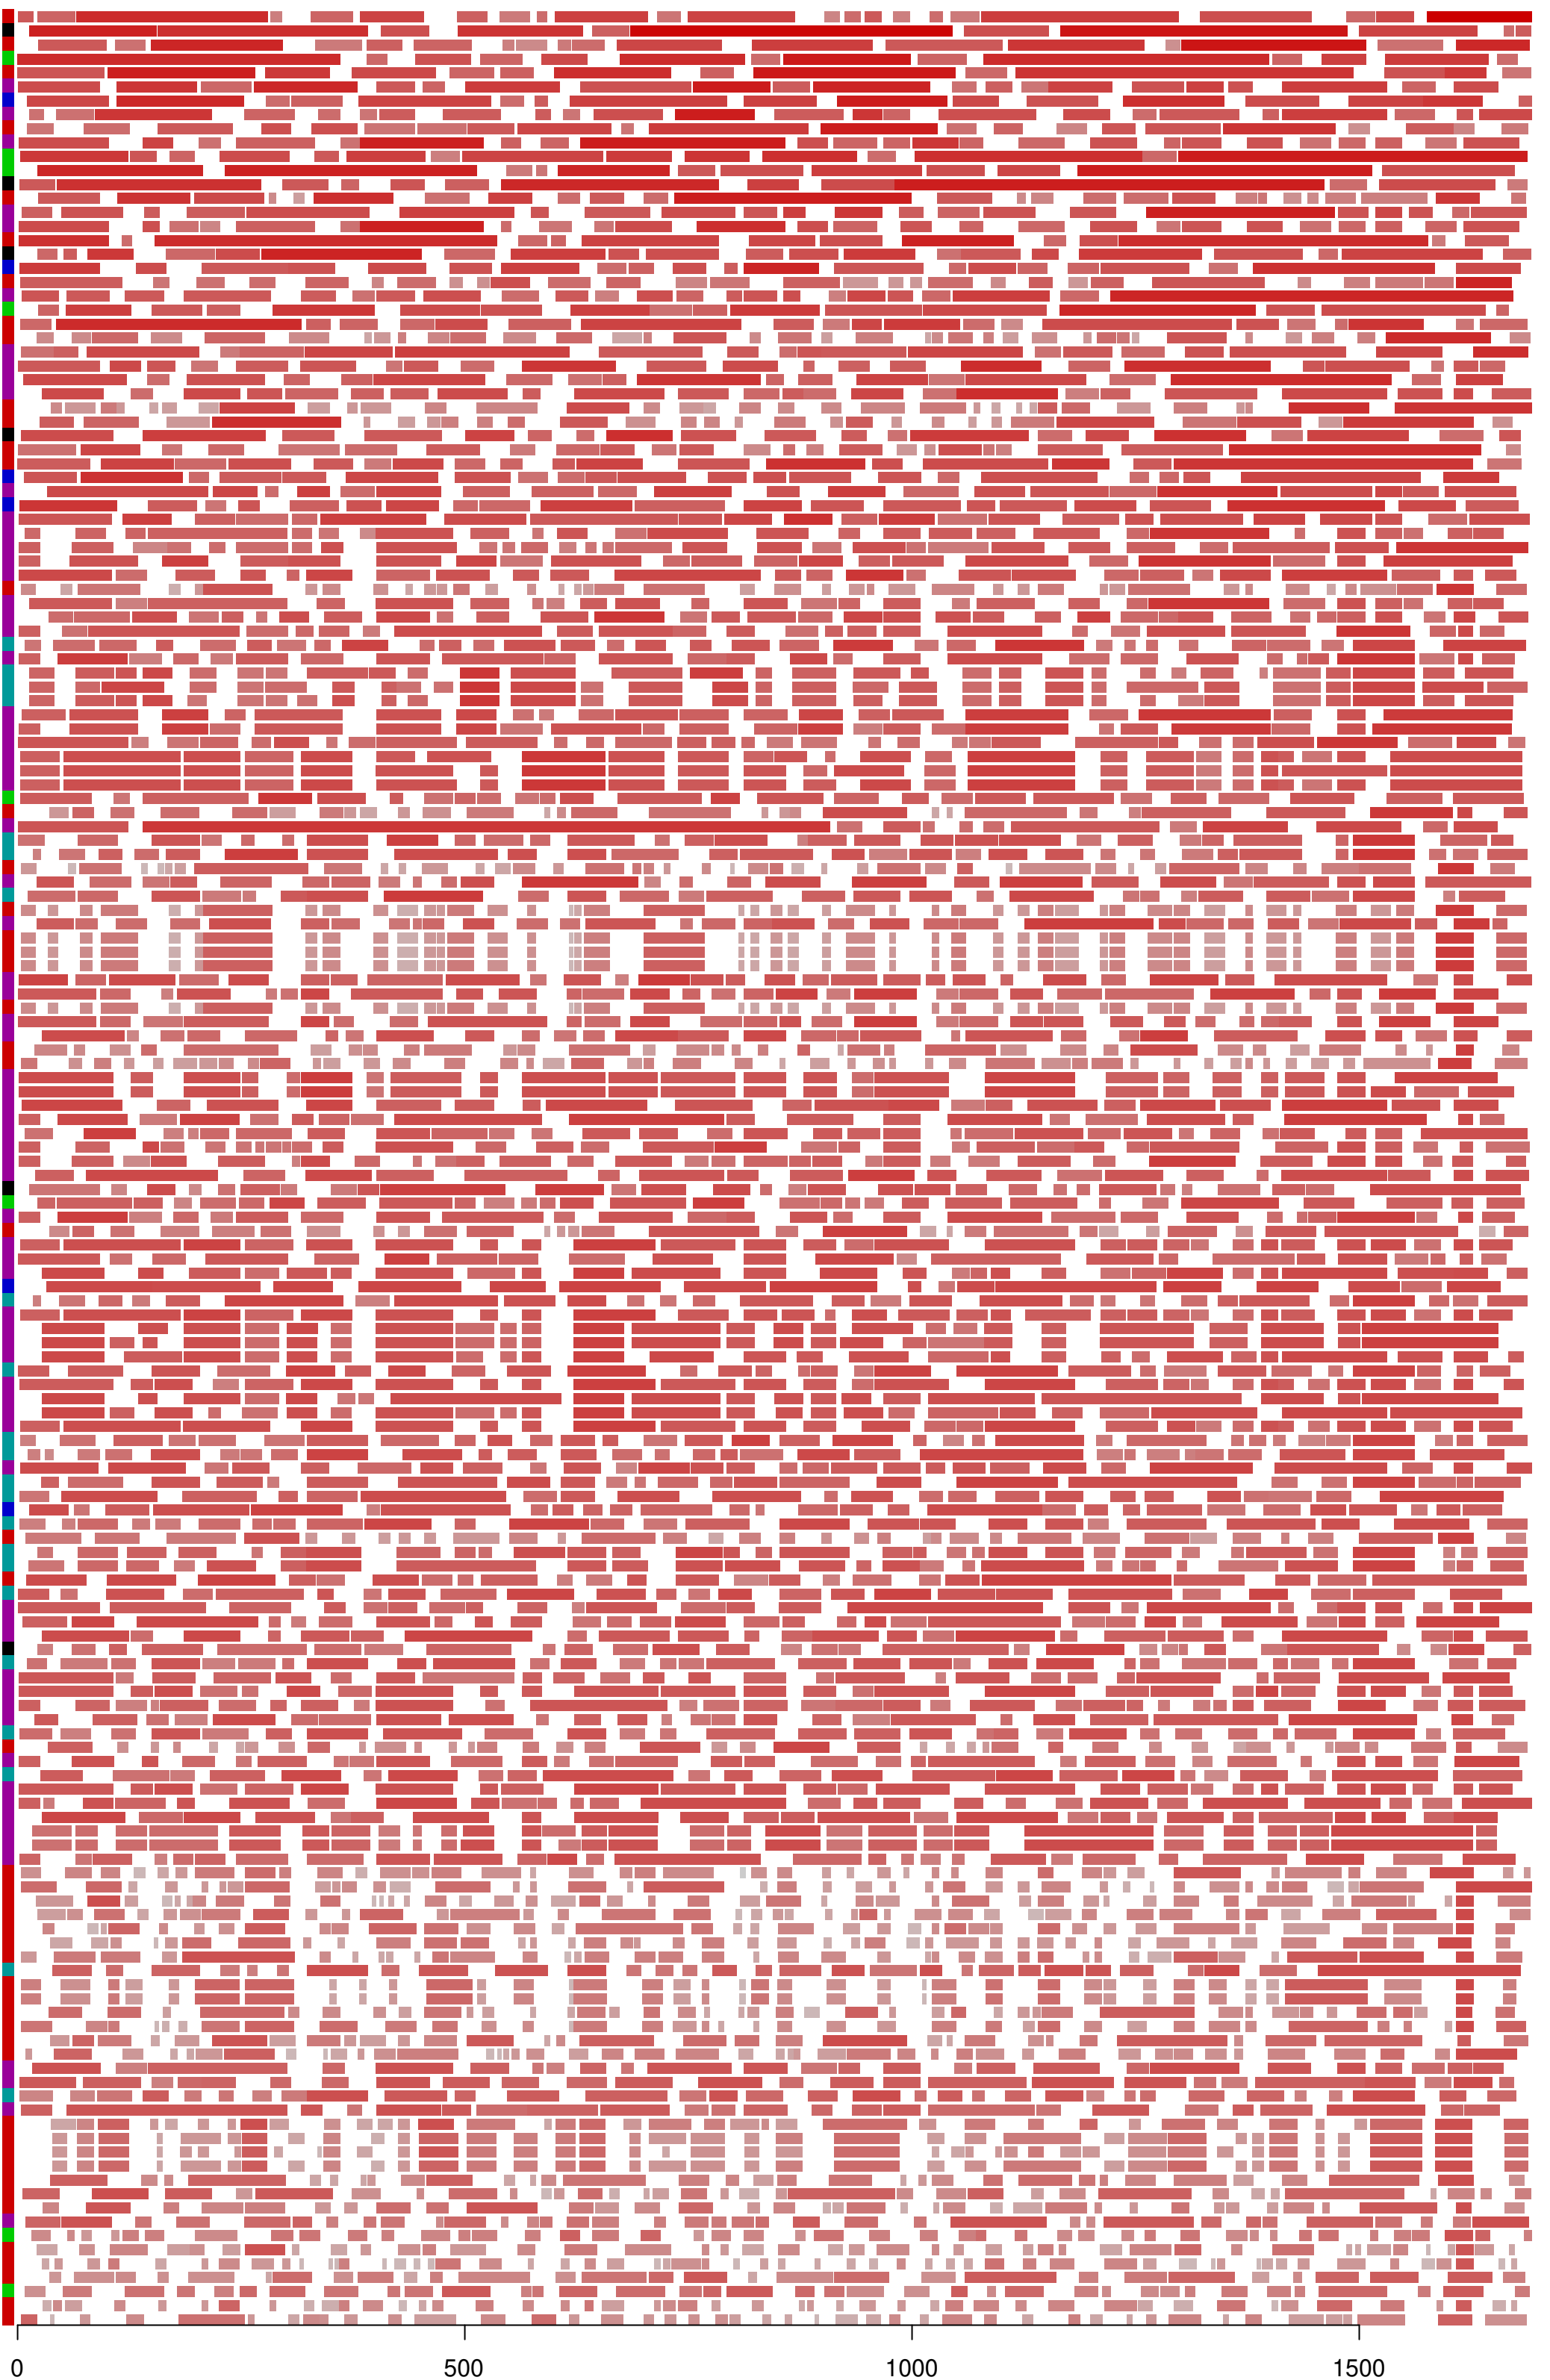

0 500 1000 1500

0 alignments above max size (1.0e+08)

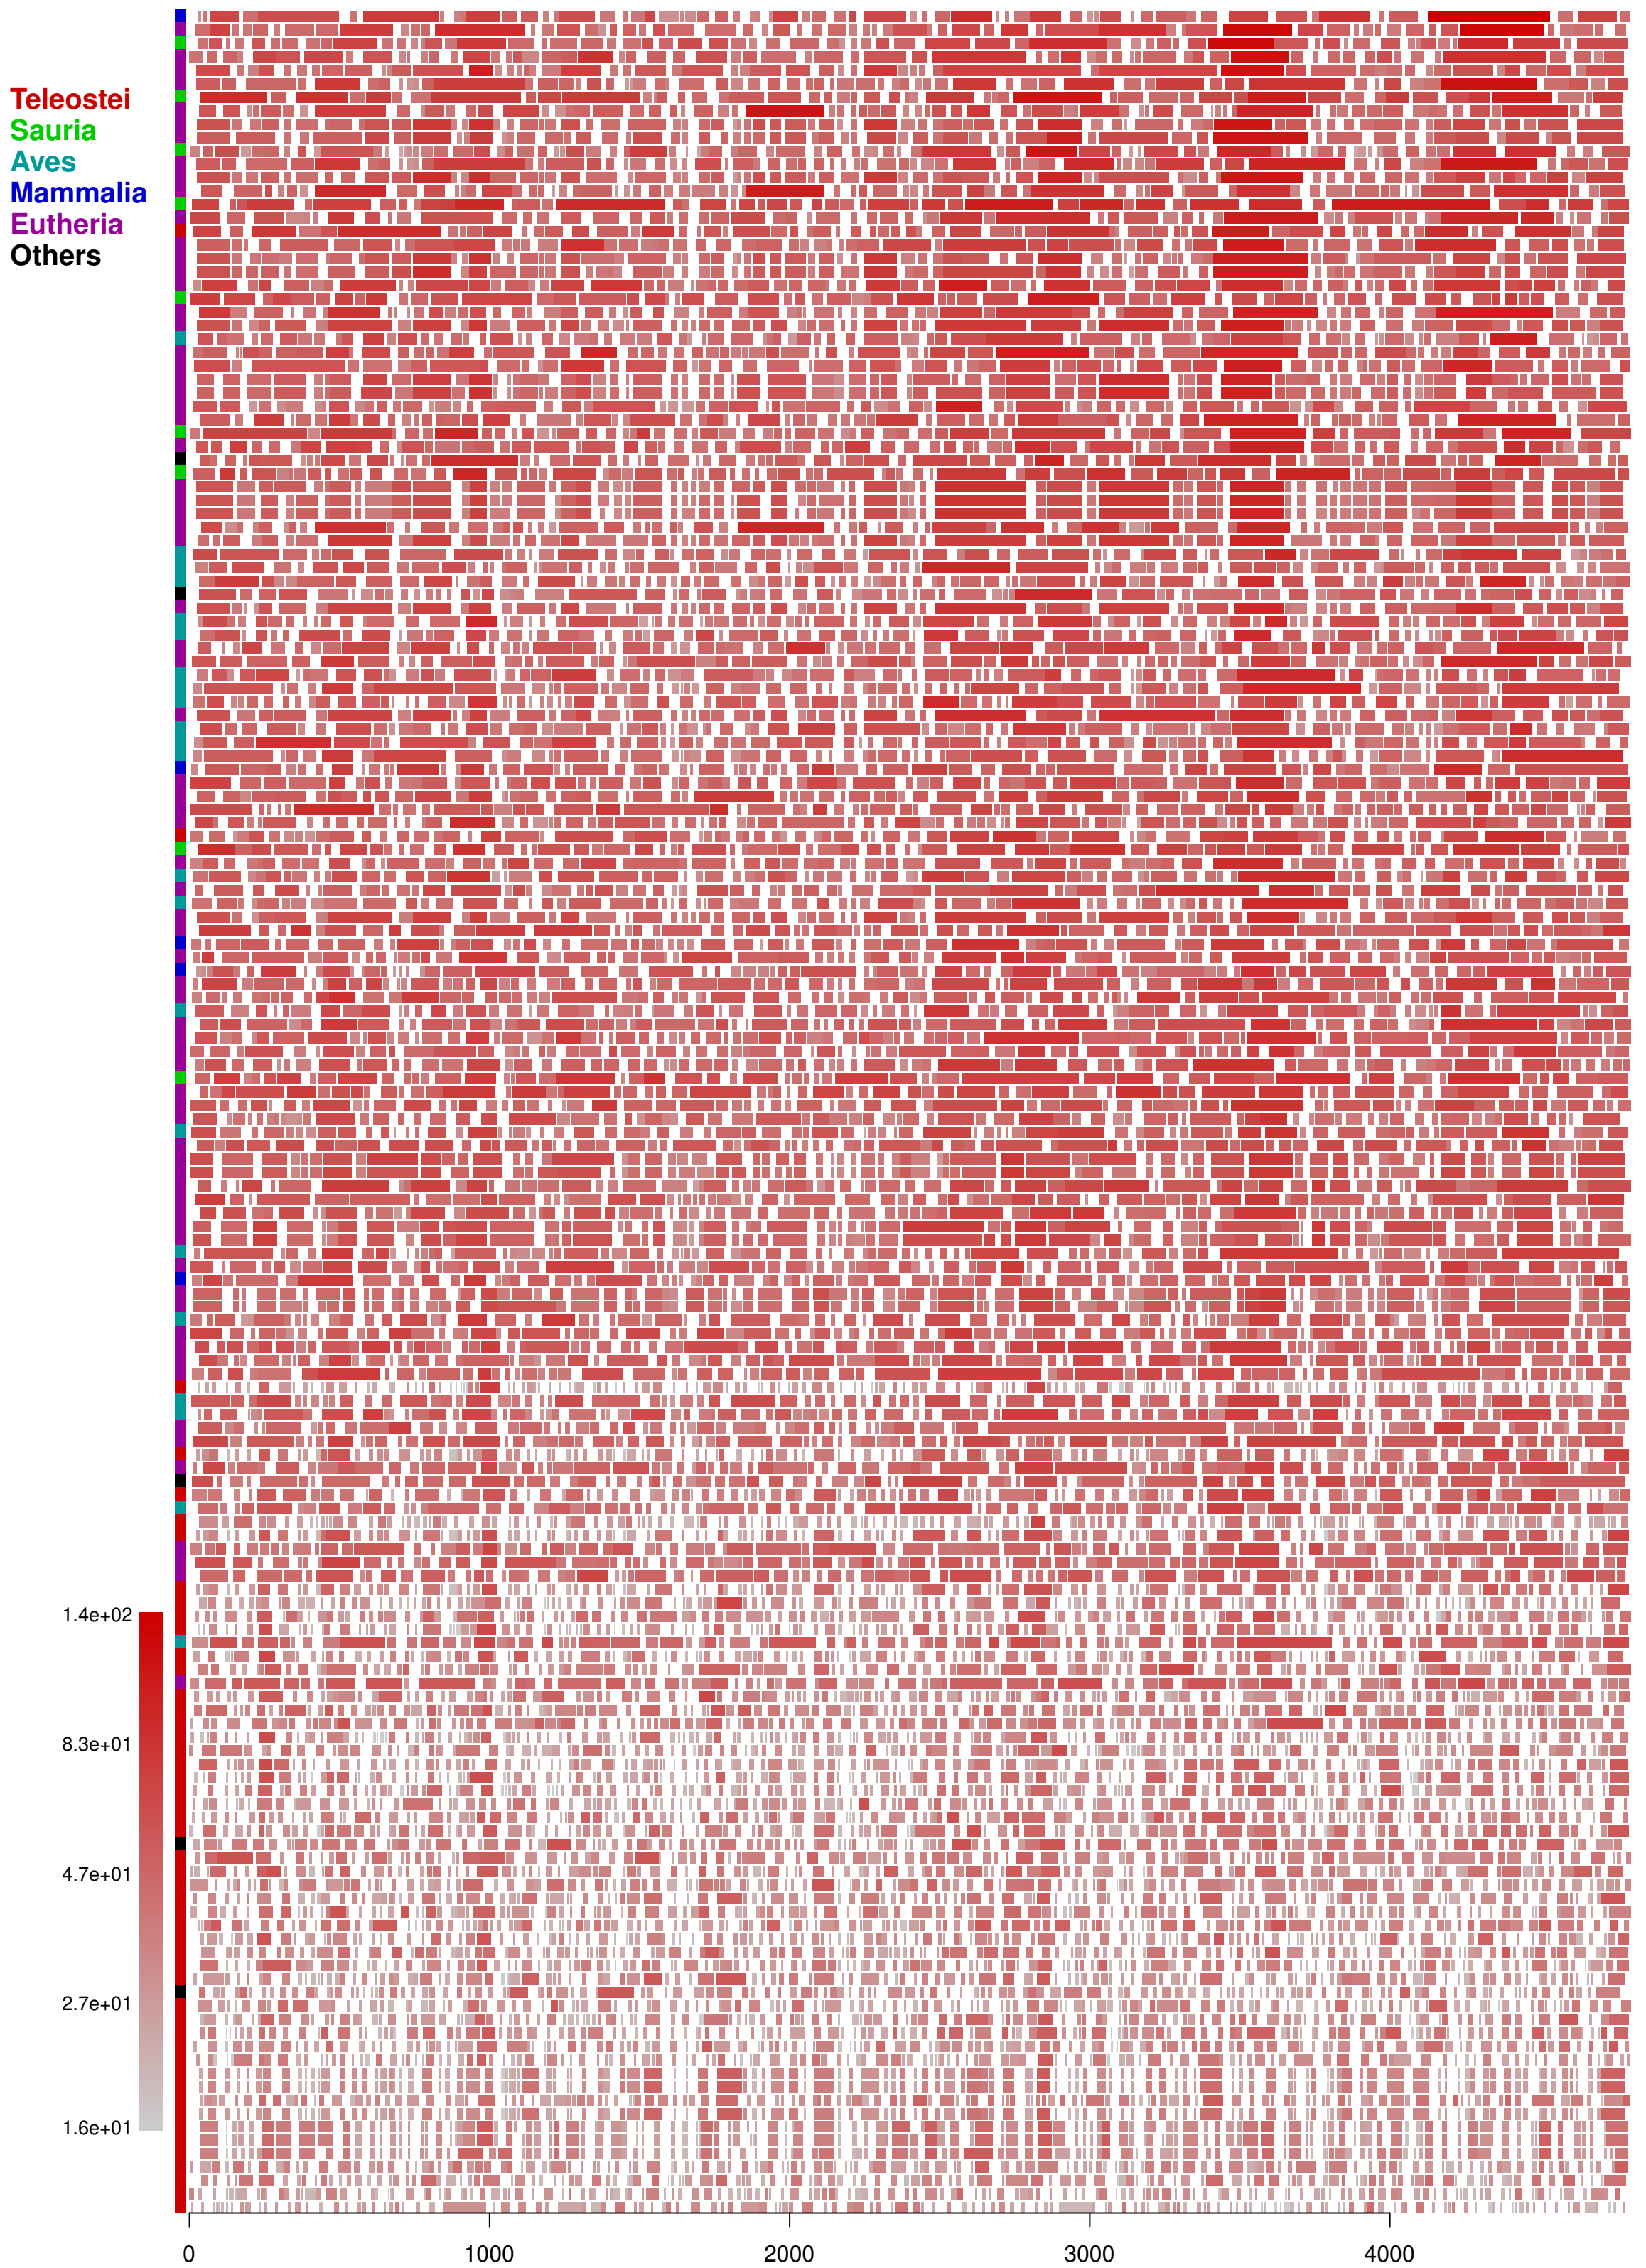

1 alignments above max size (1.0e+08)

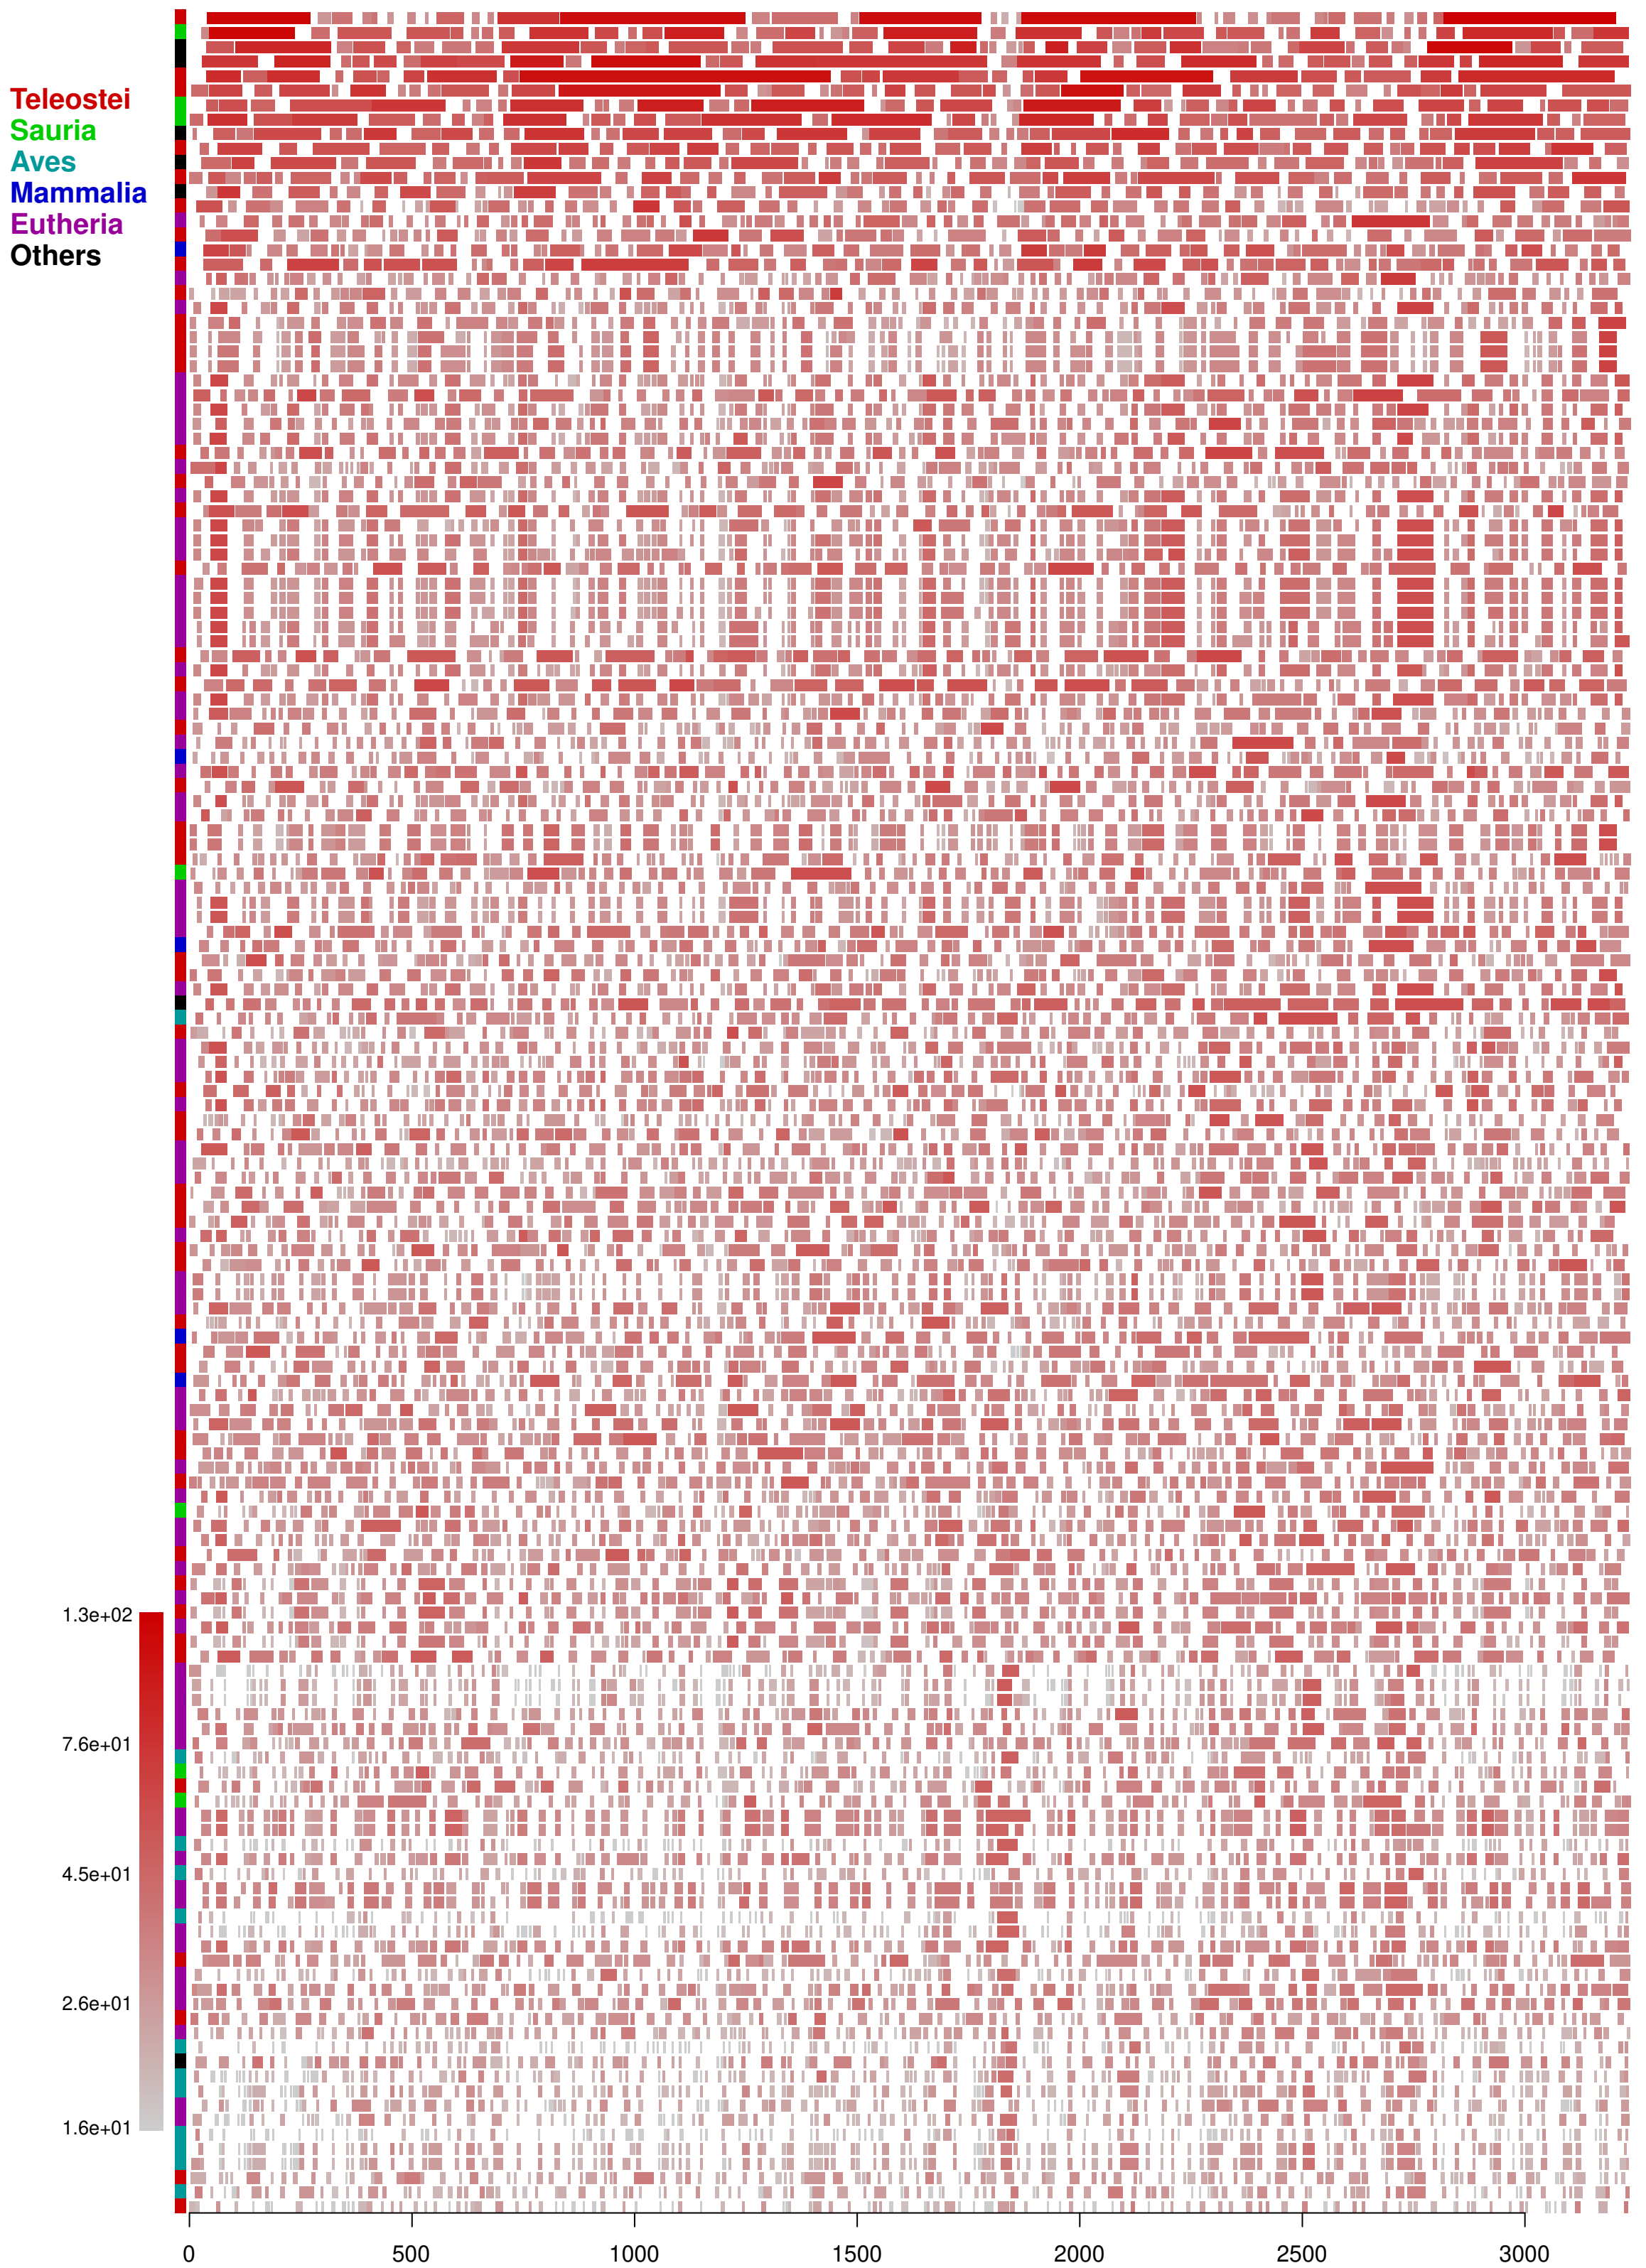

0 alignments above max size (1.0e+08)

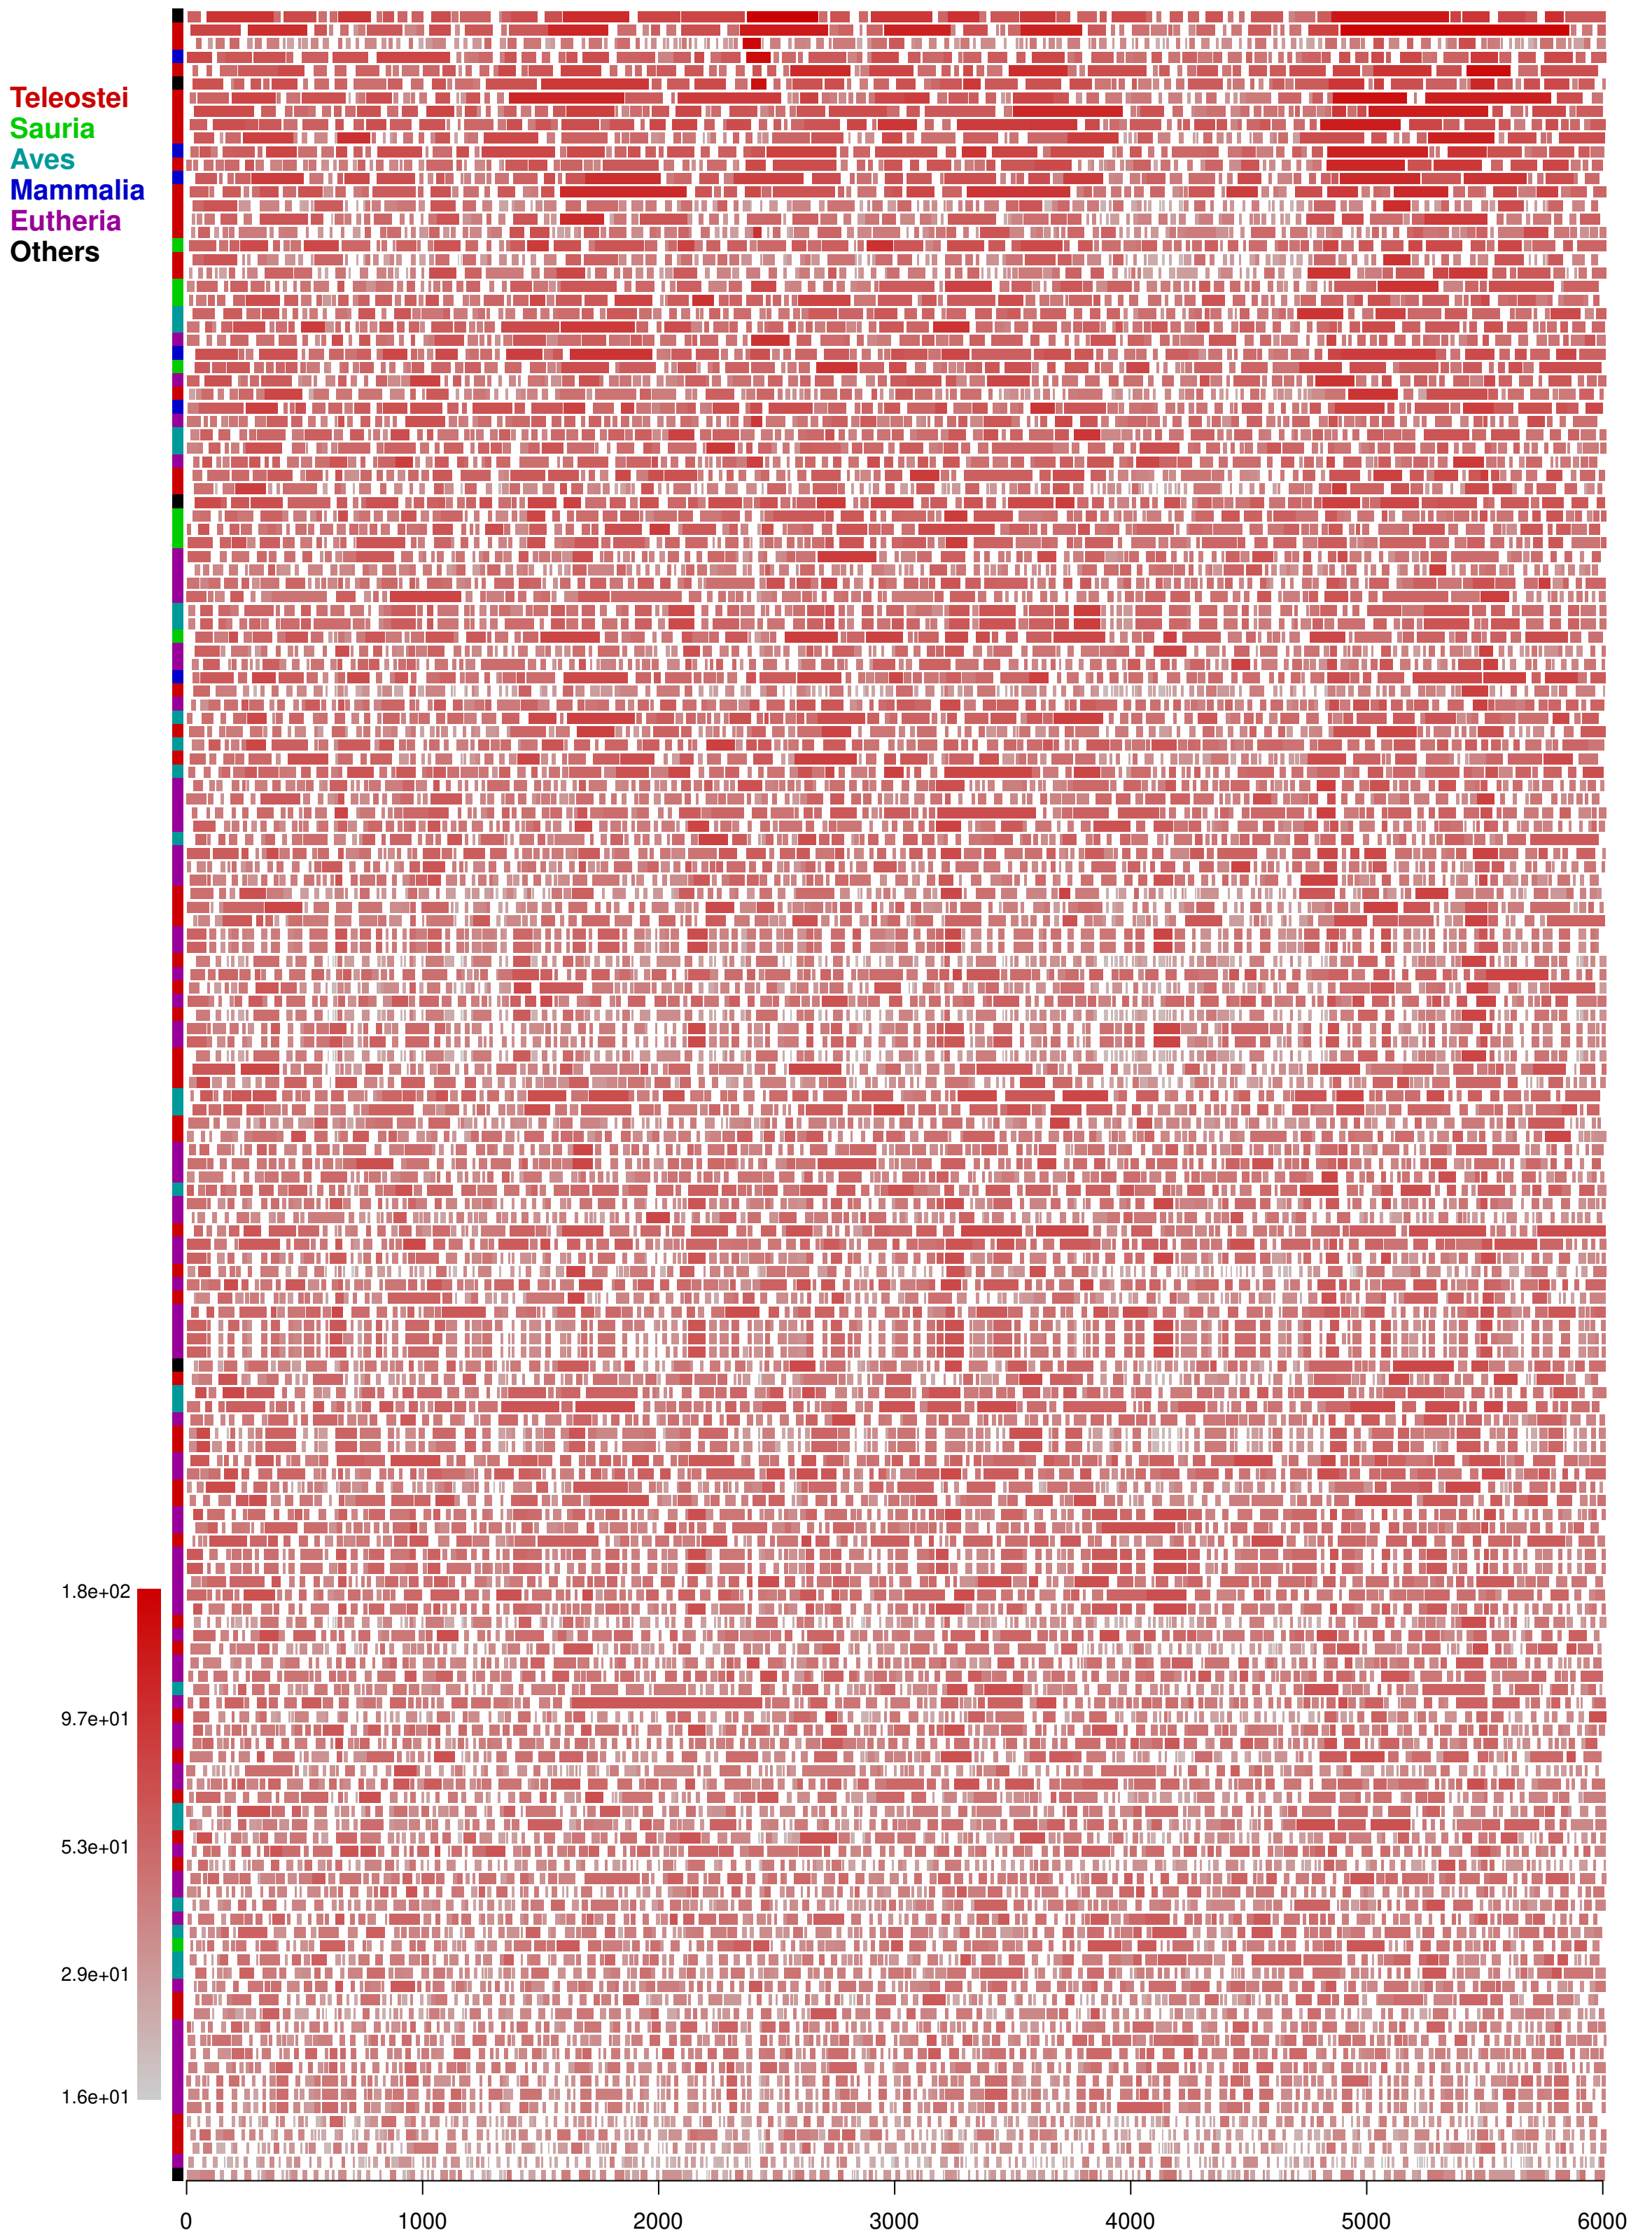

0 alignments above max size (1.0e+08)

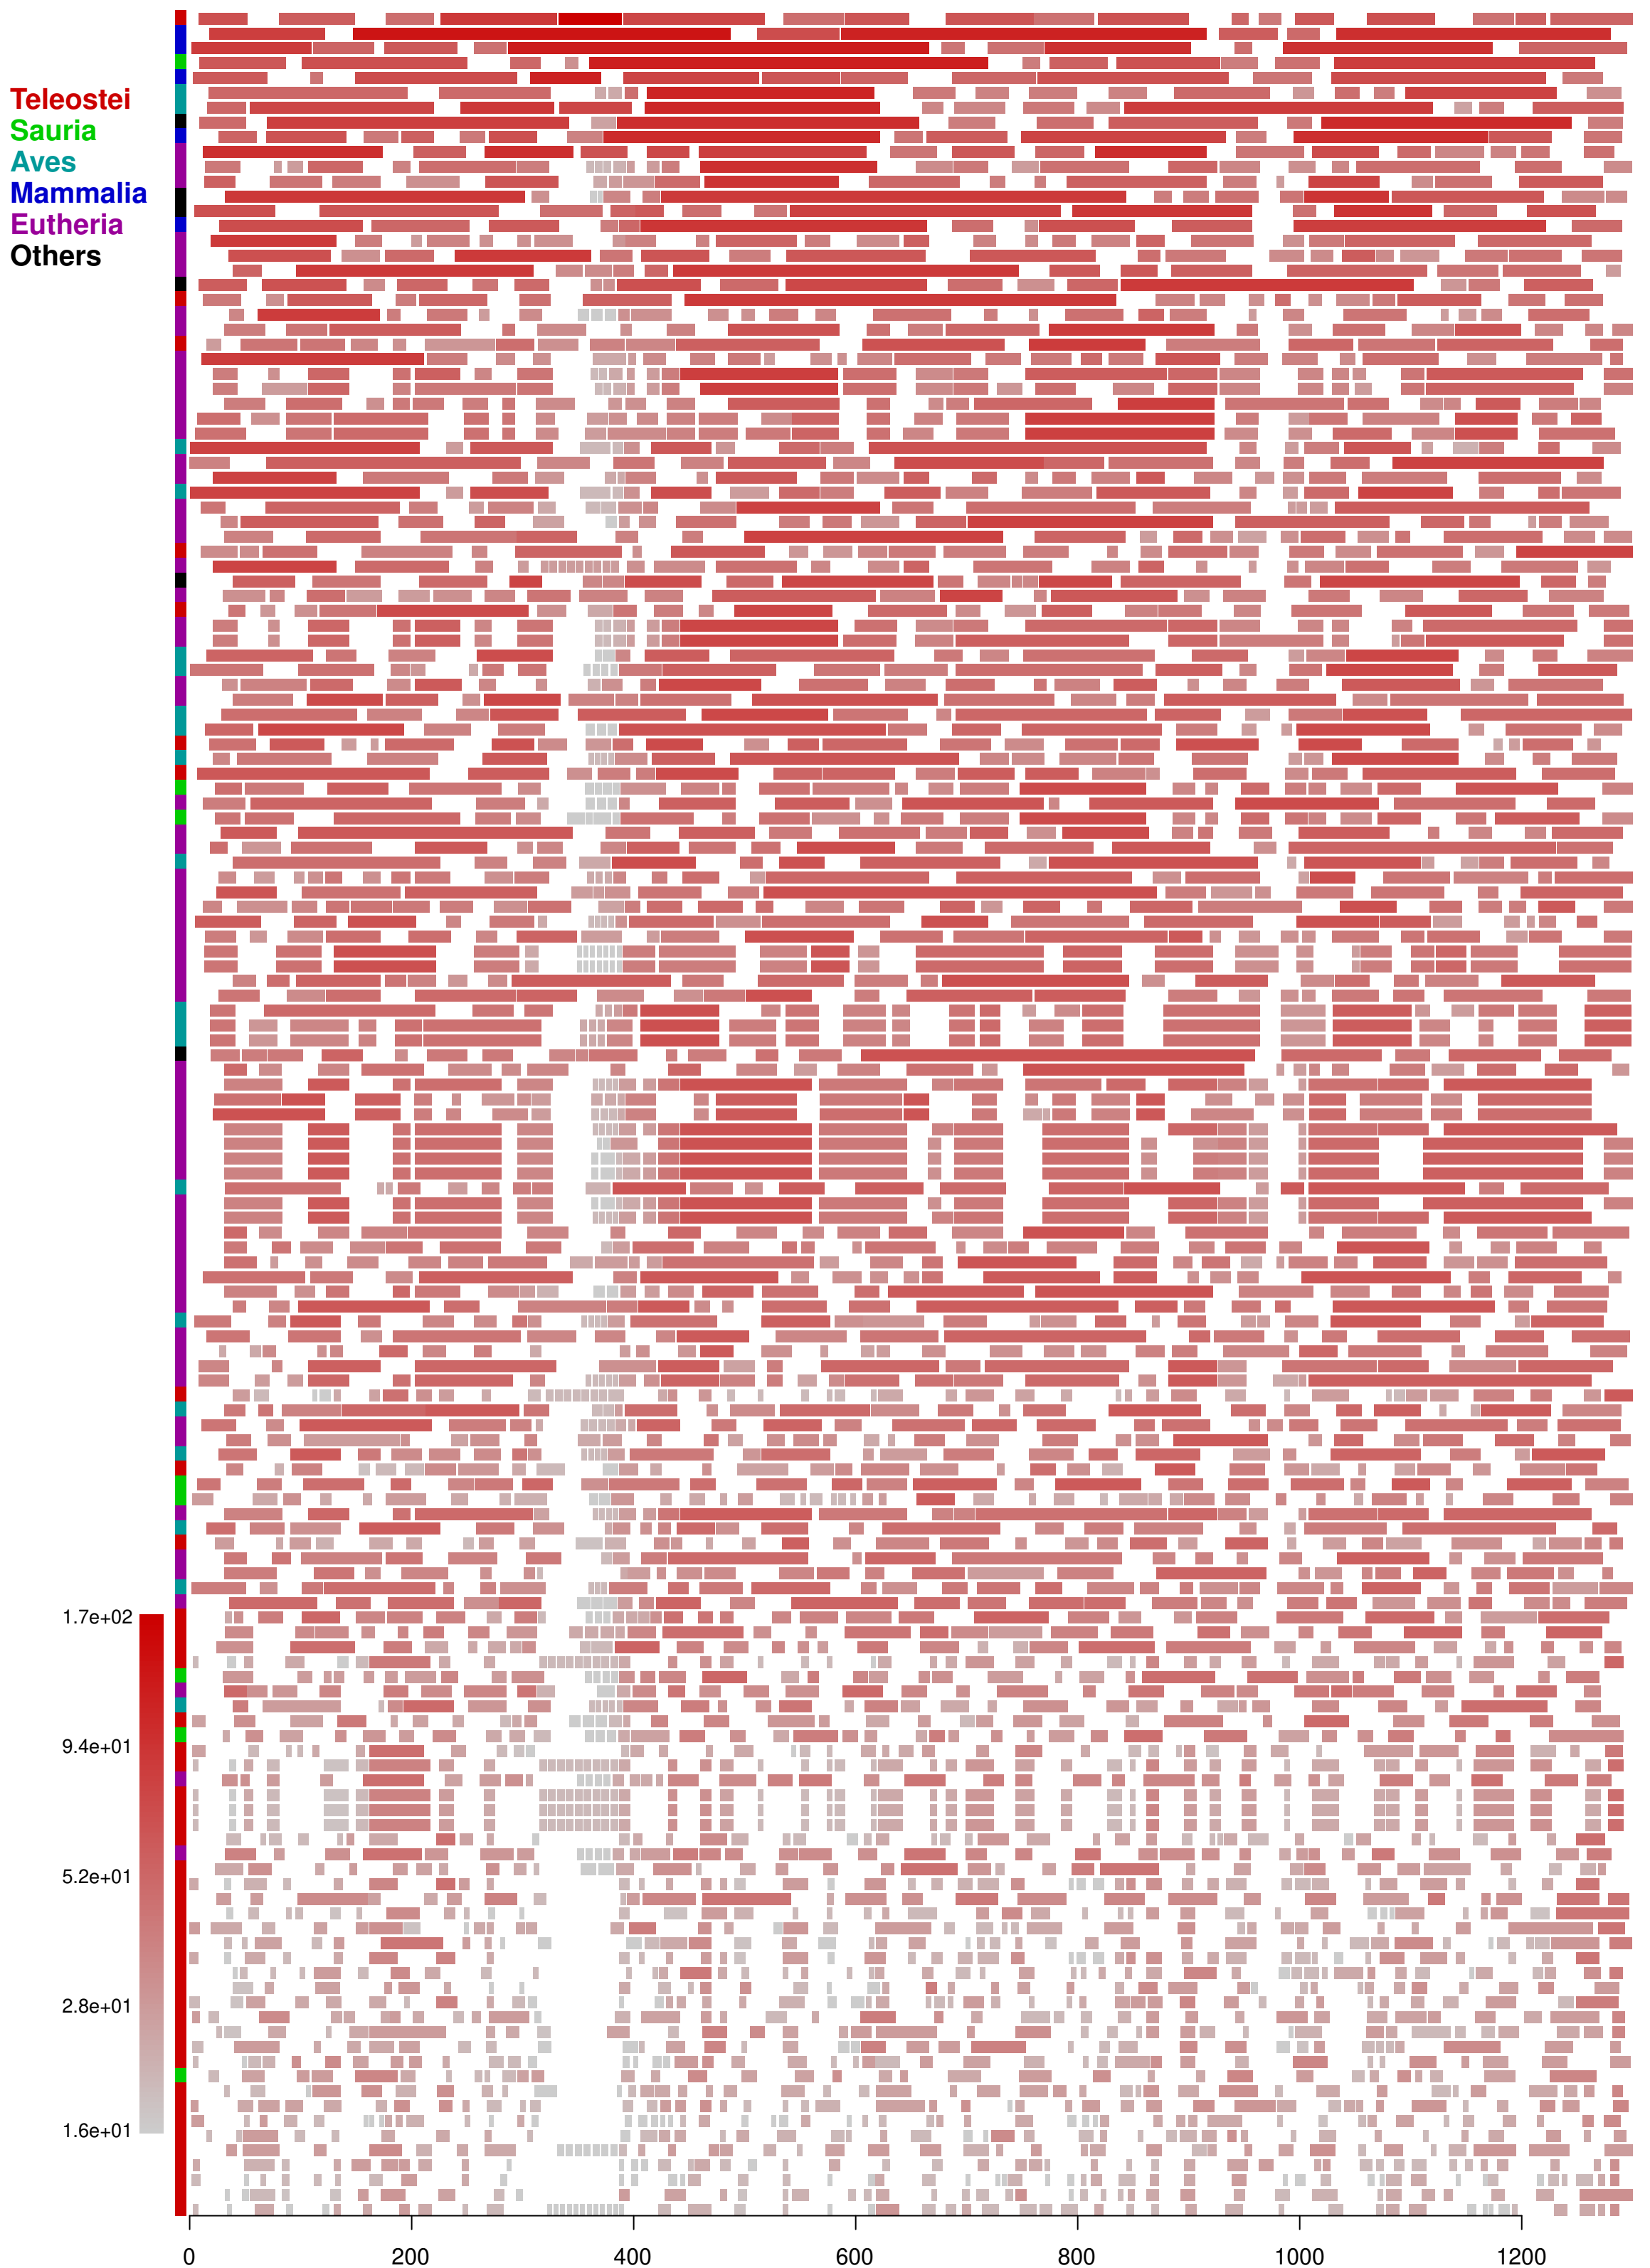

0 alignments above max size (1.0e+08)

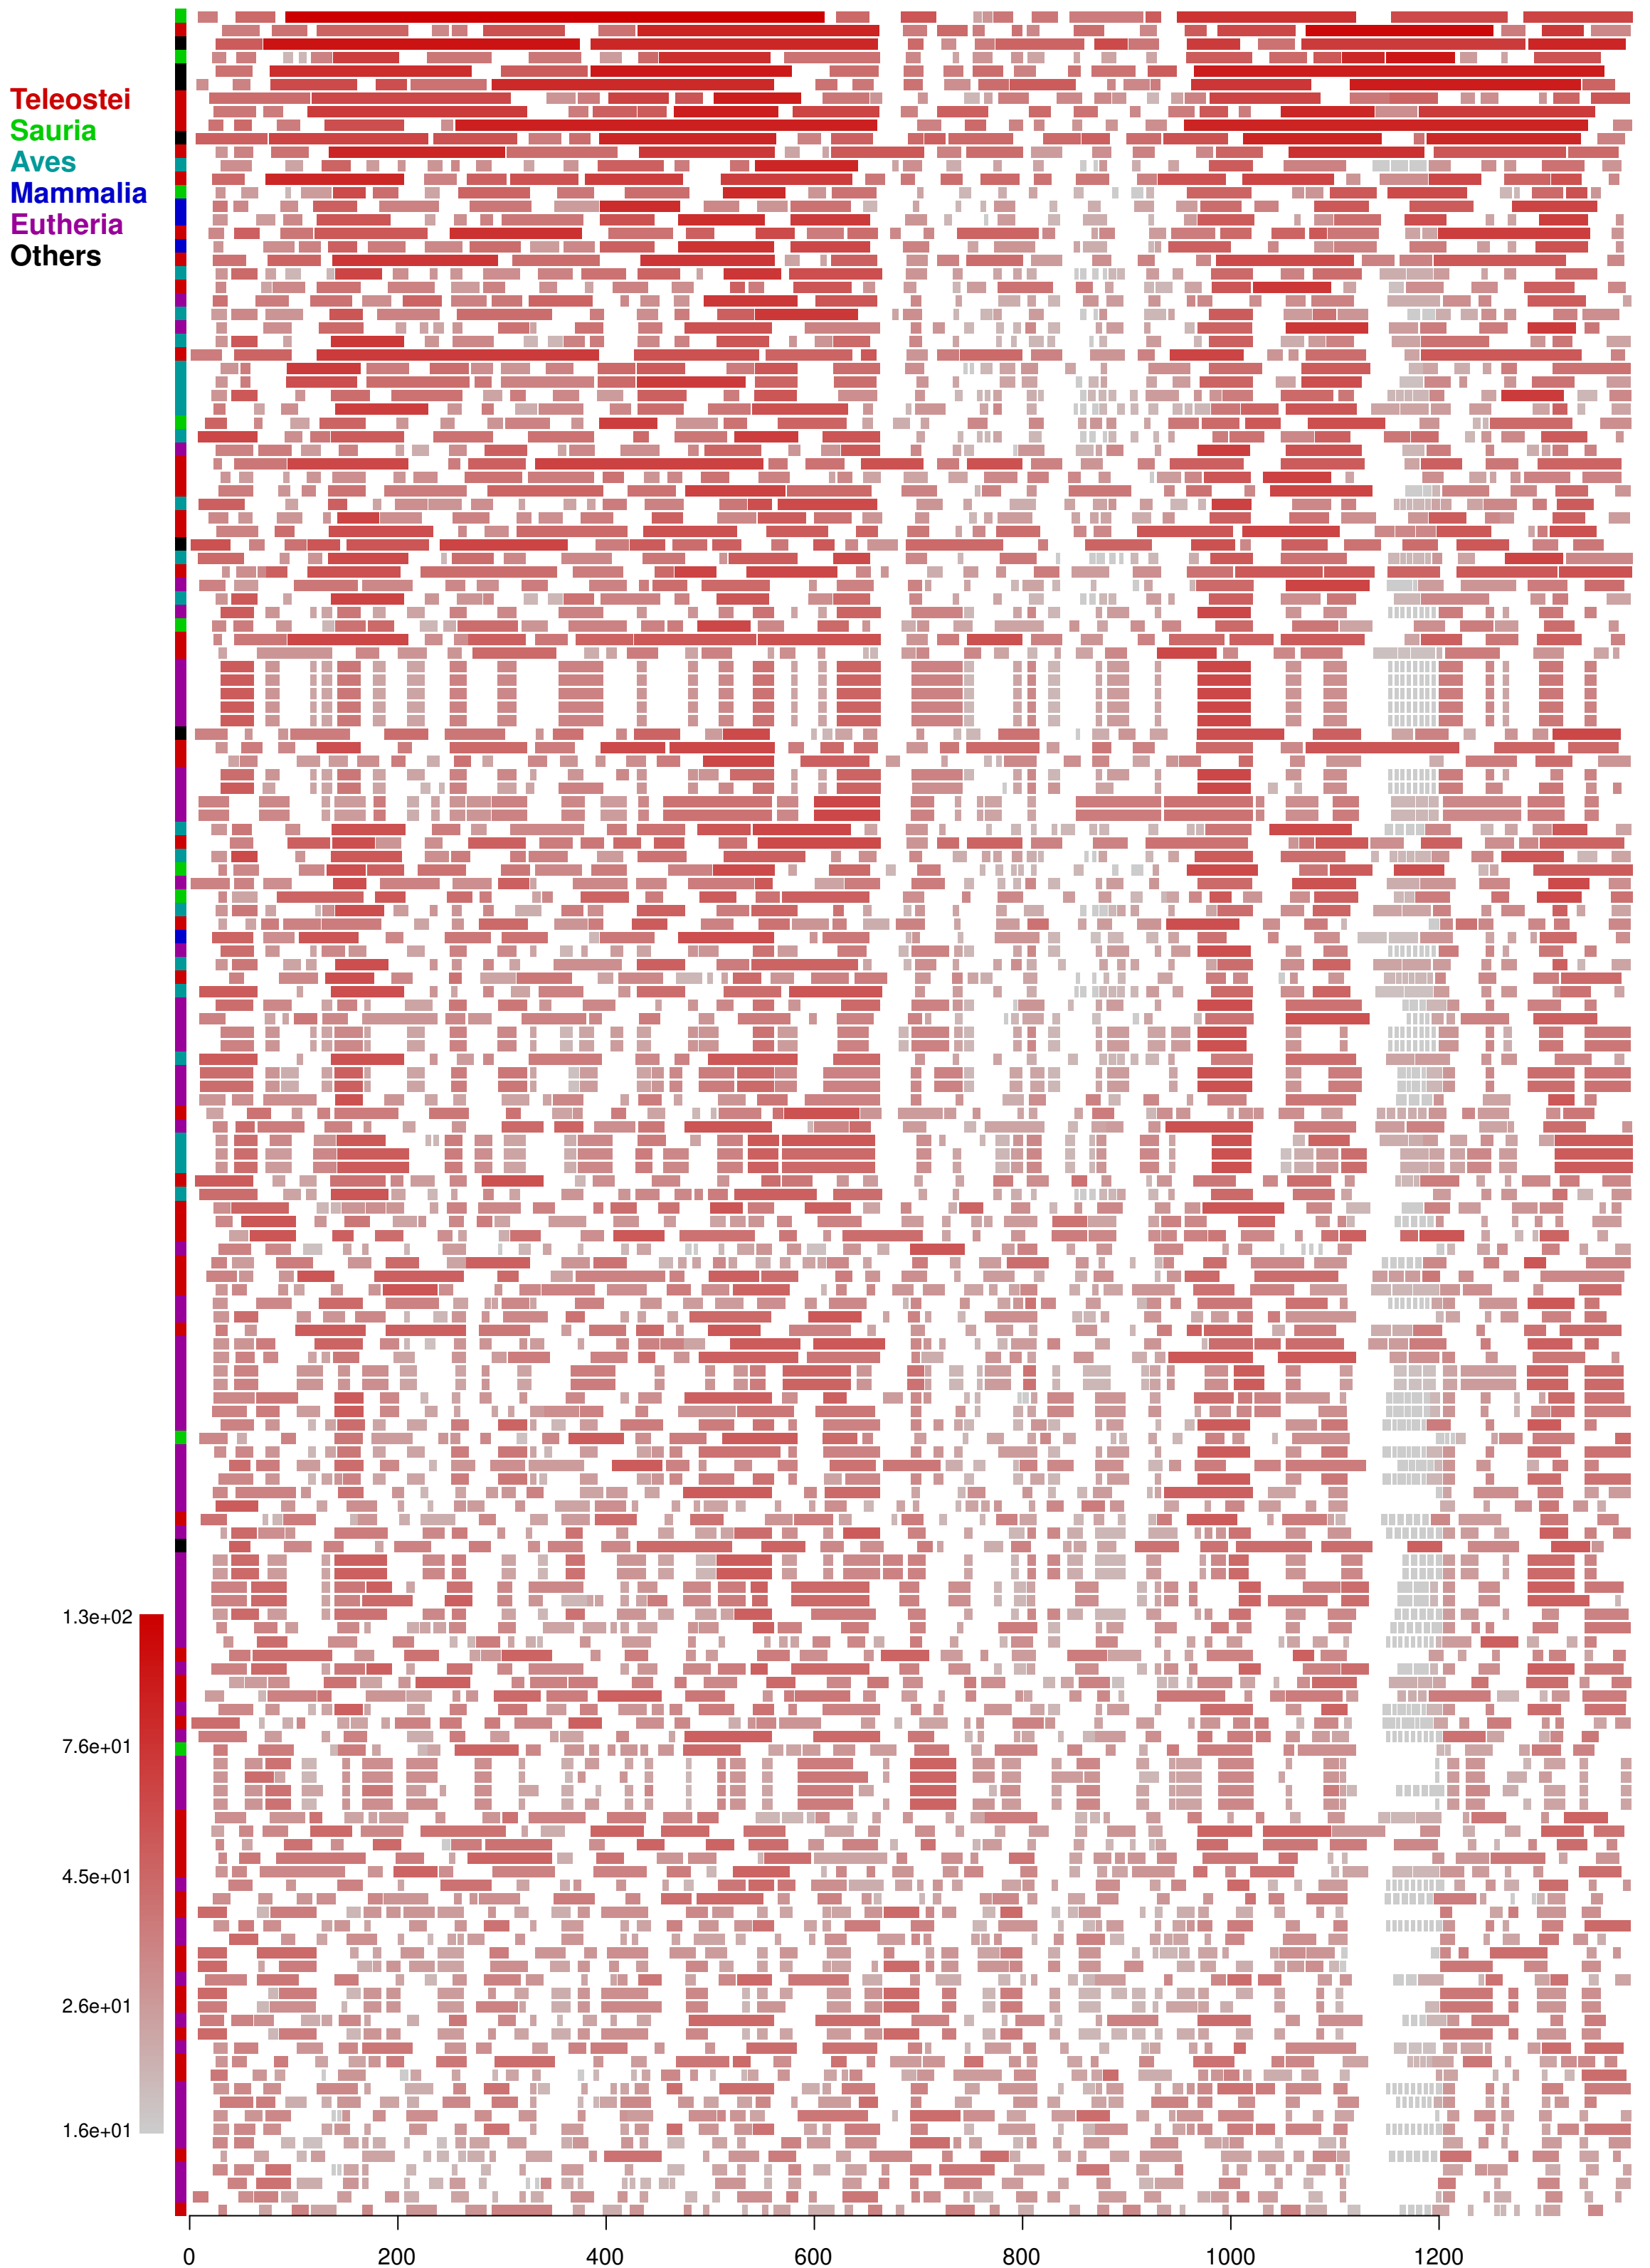

0 alignments above max size (1.0e+08)



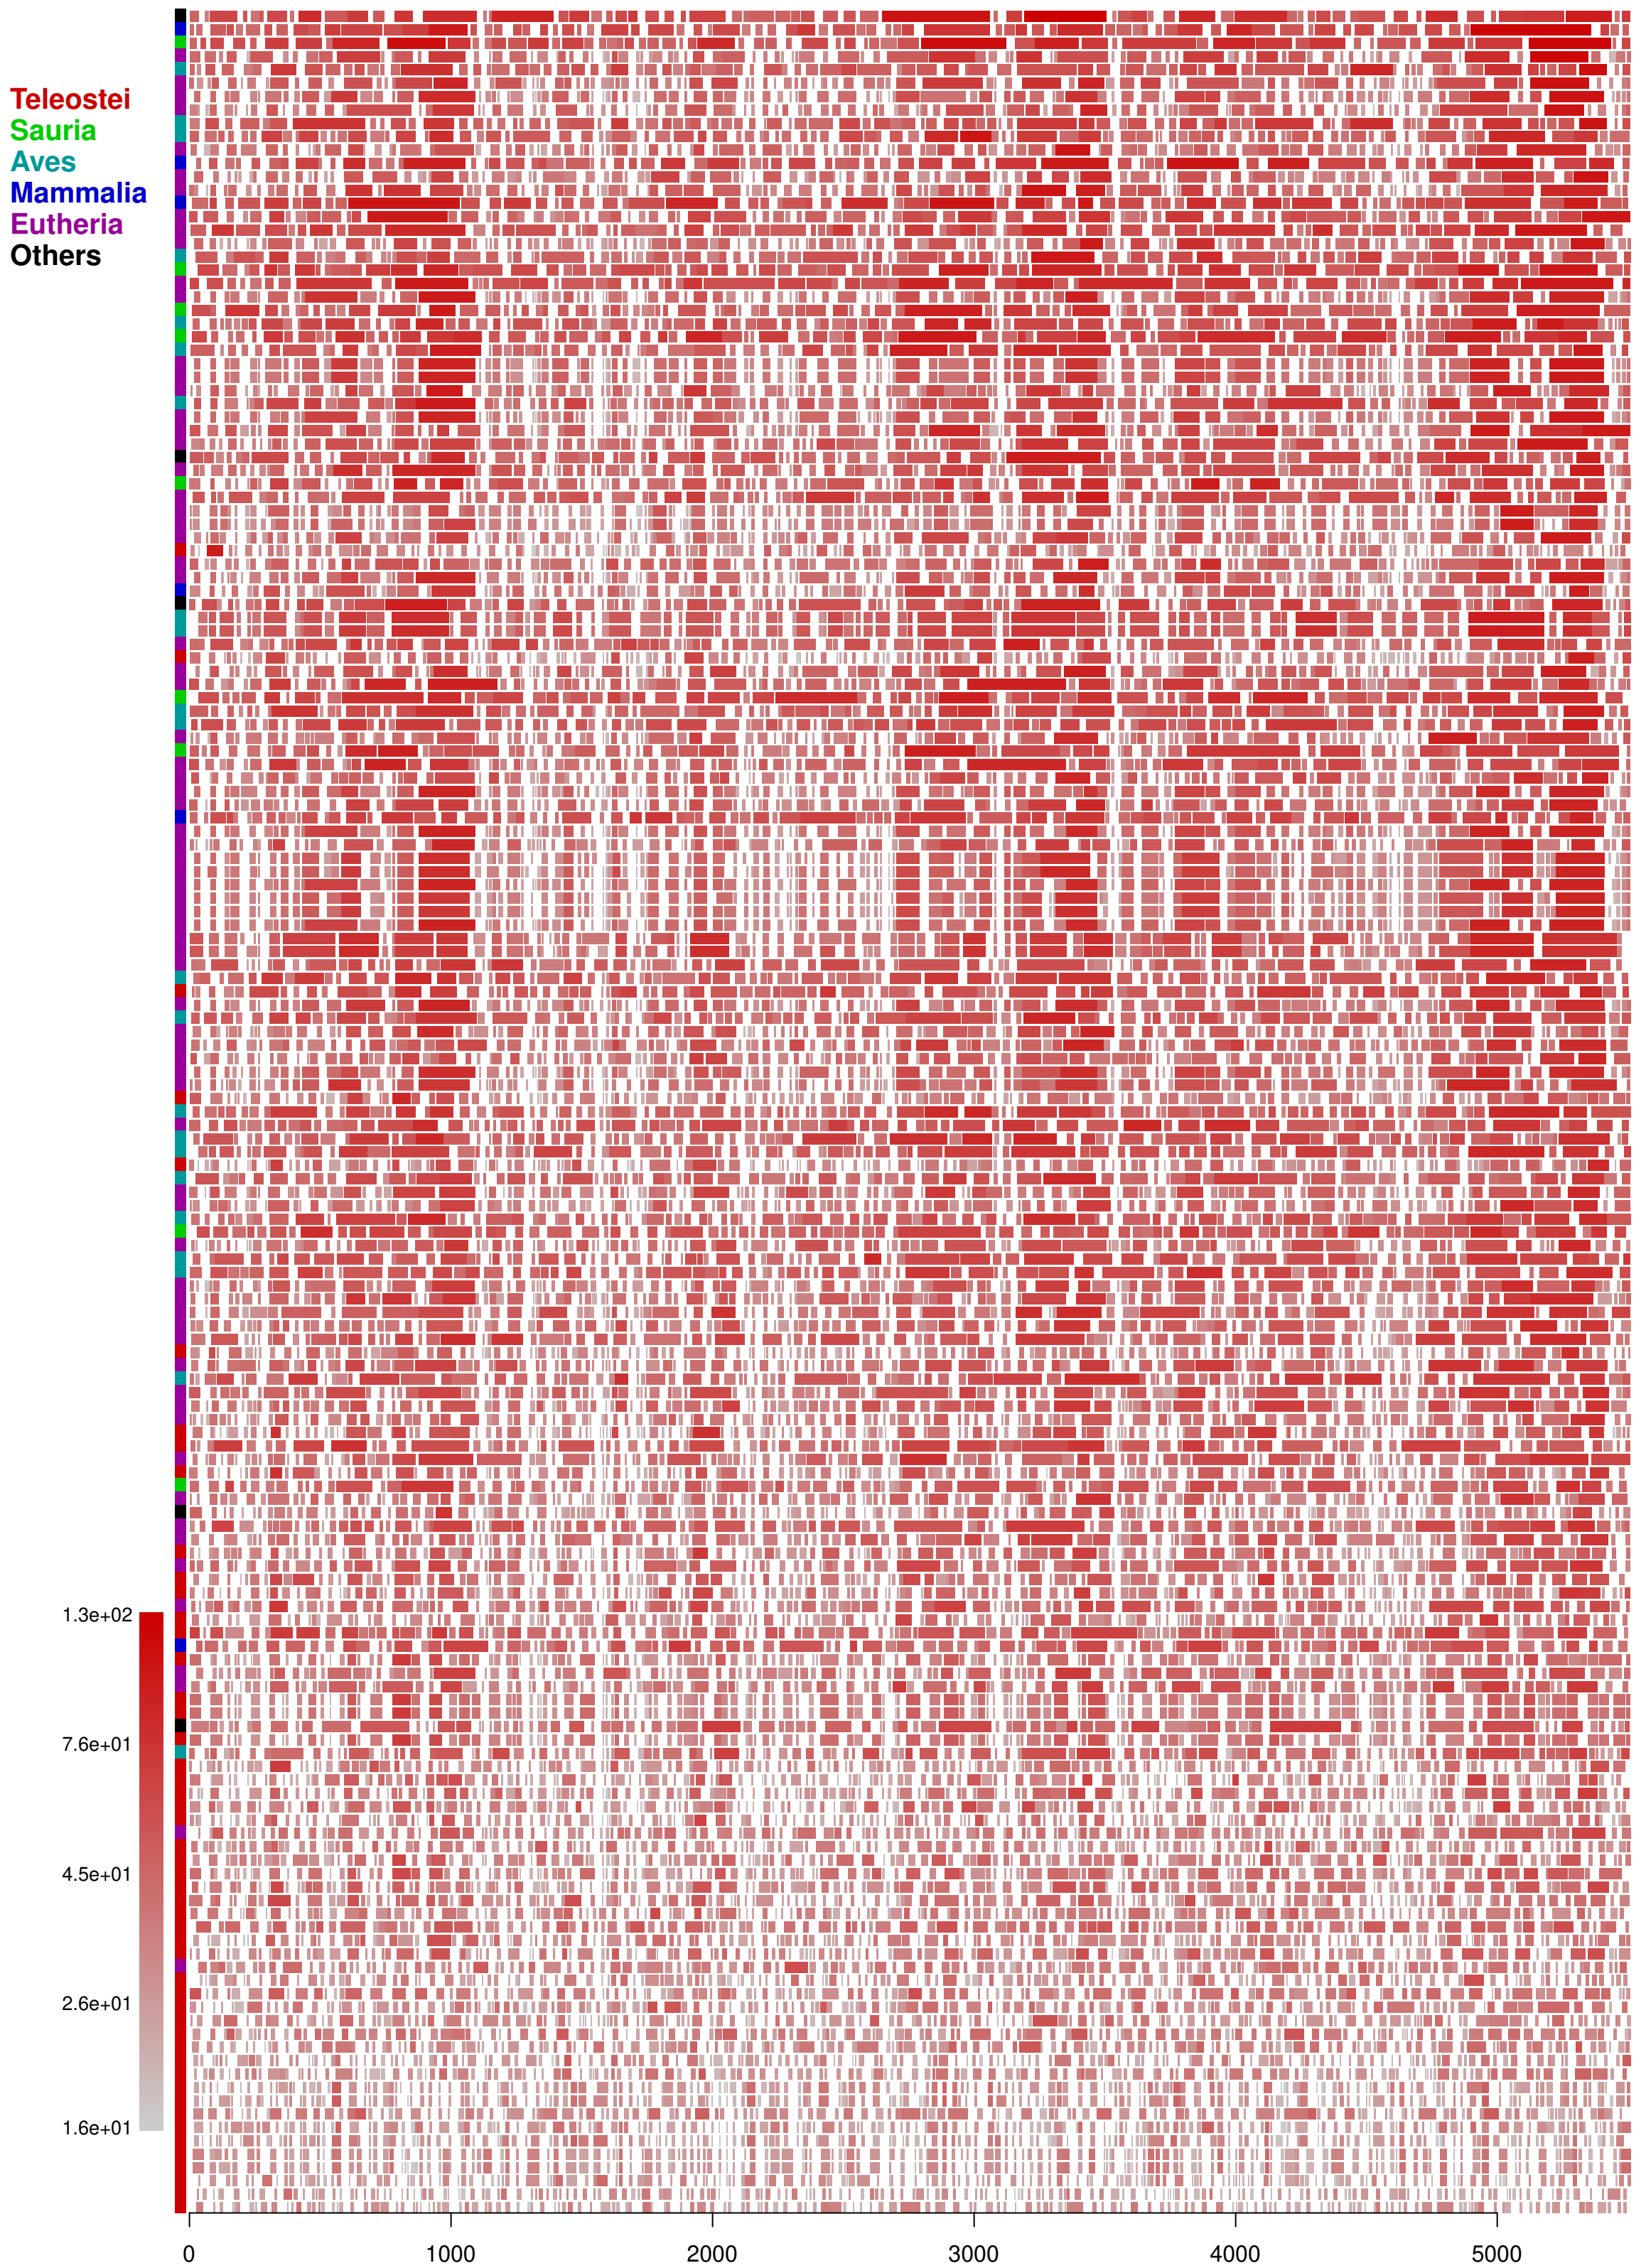

0 alignments above max size (1.0e+08)

Teleostei  
Sauria  
Aves  
Mammalia  
Eutheria  
Others

1.0e+02  
6.4e+01  
4.0e+01  
2.5e+01  
1.6e+01

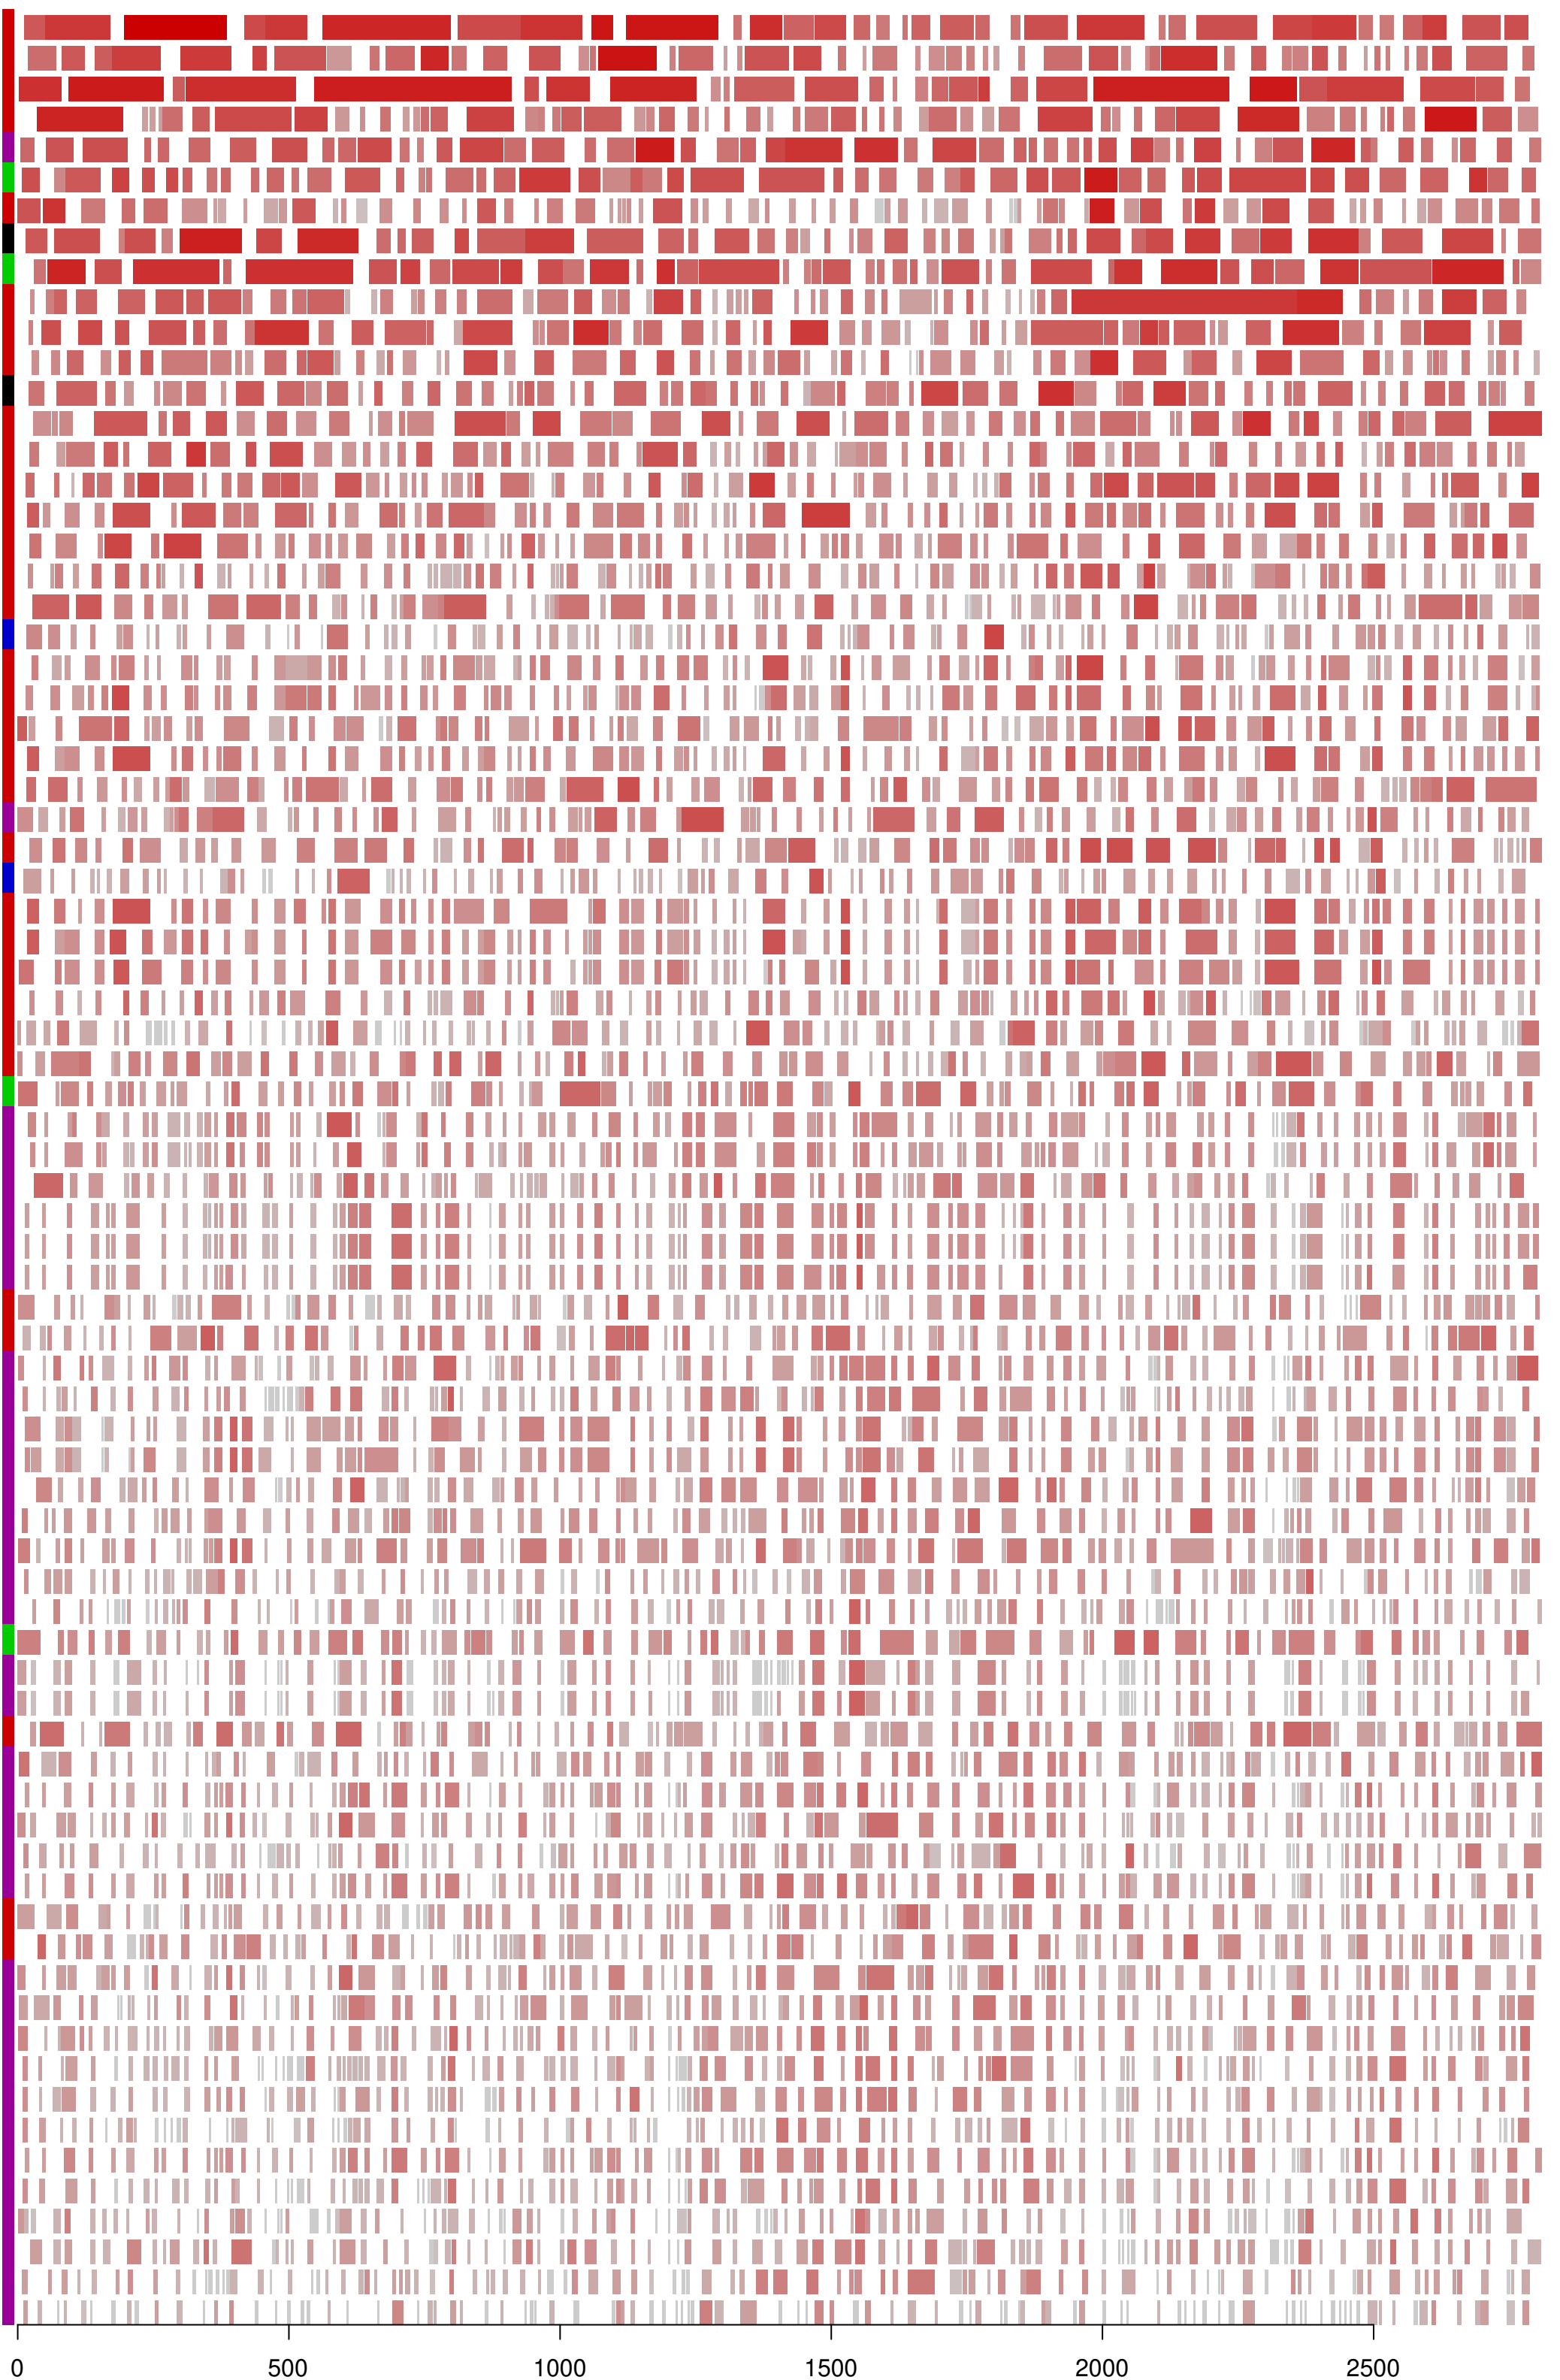

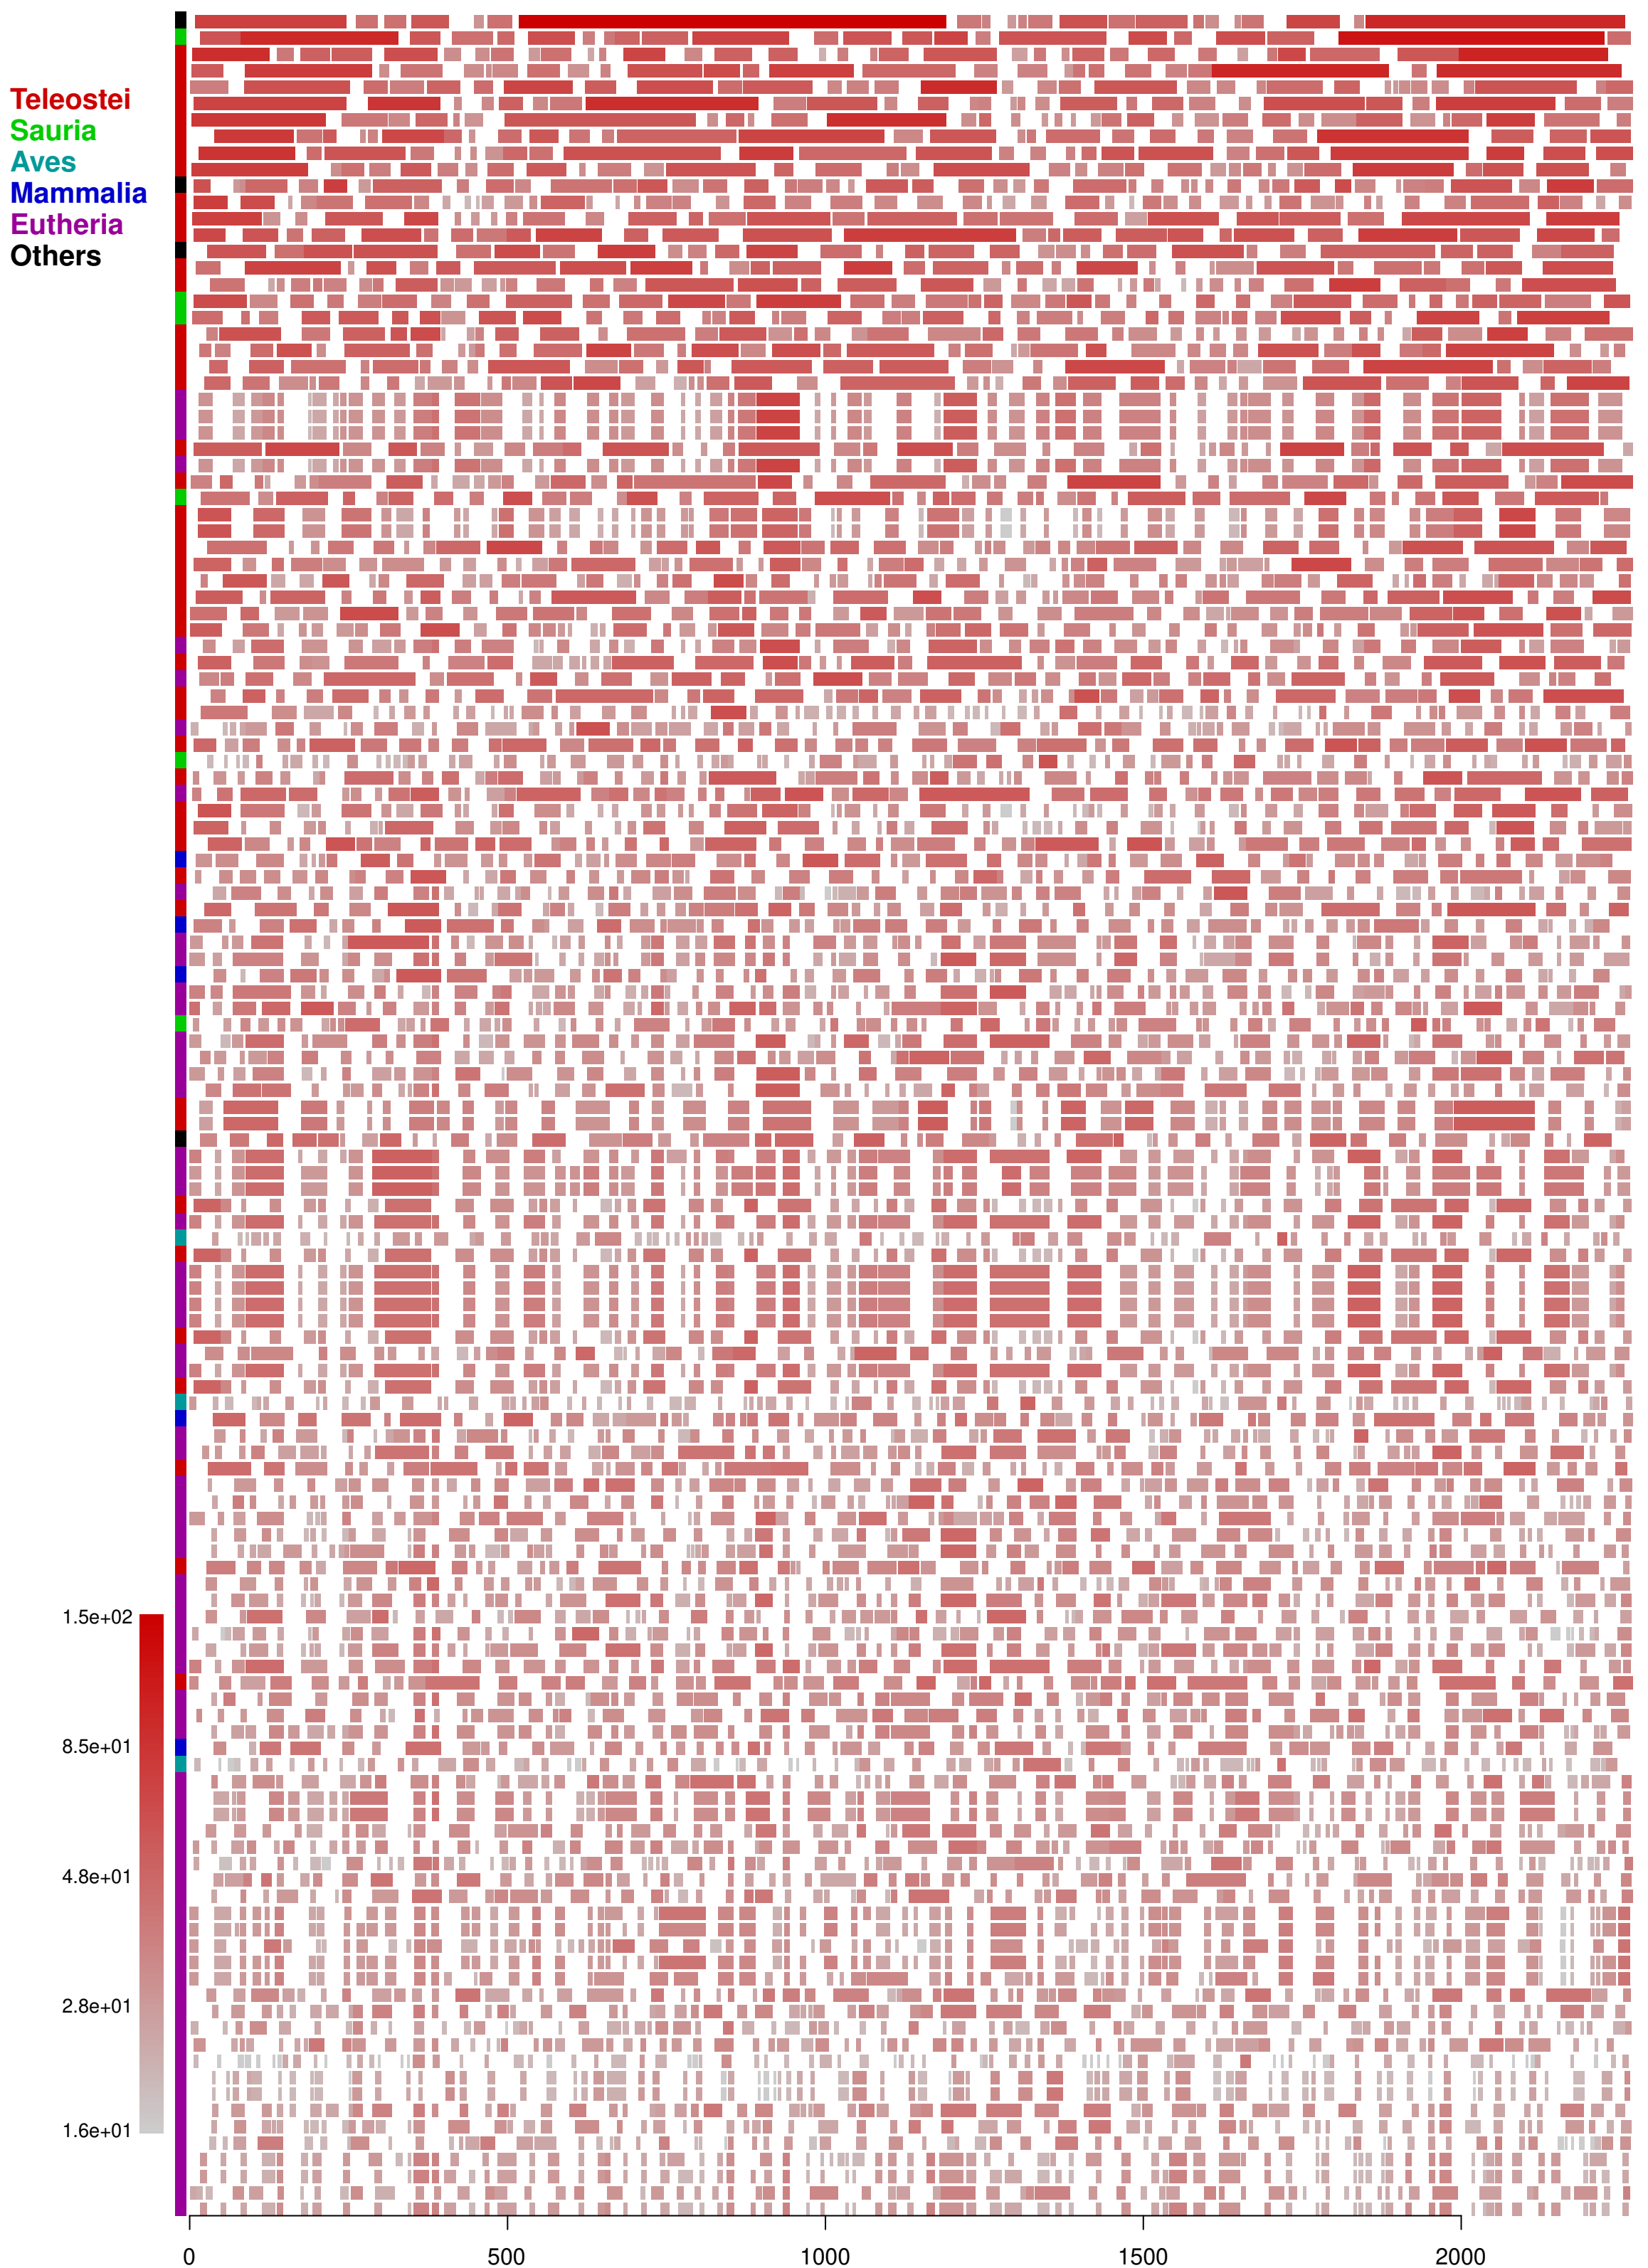

0 alignments above max size (1.0e+08)

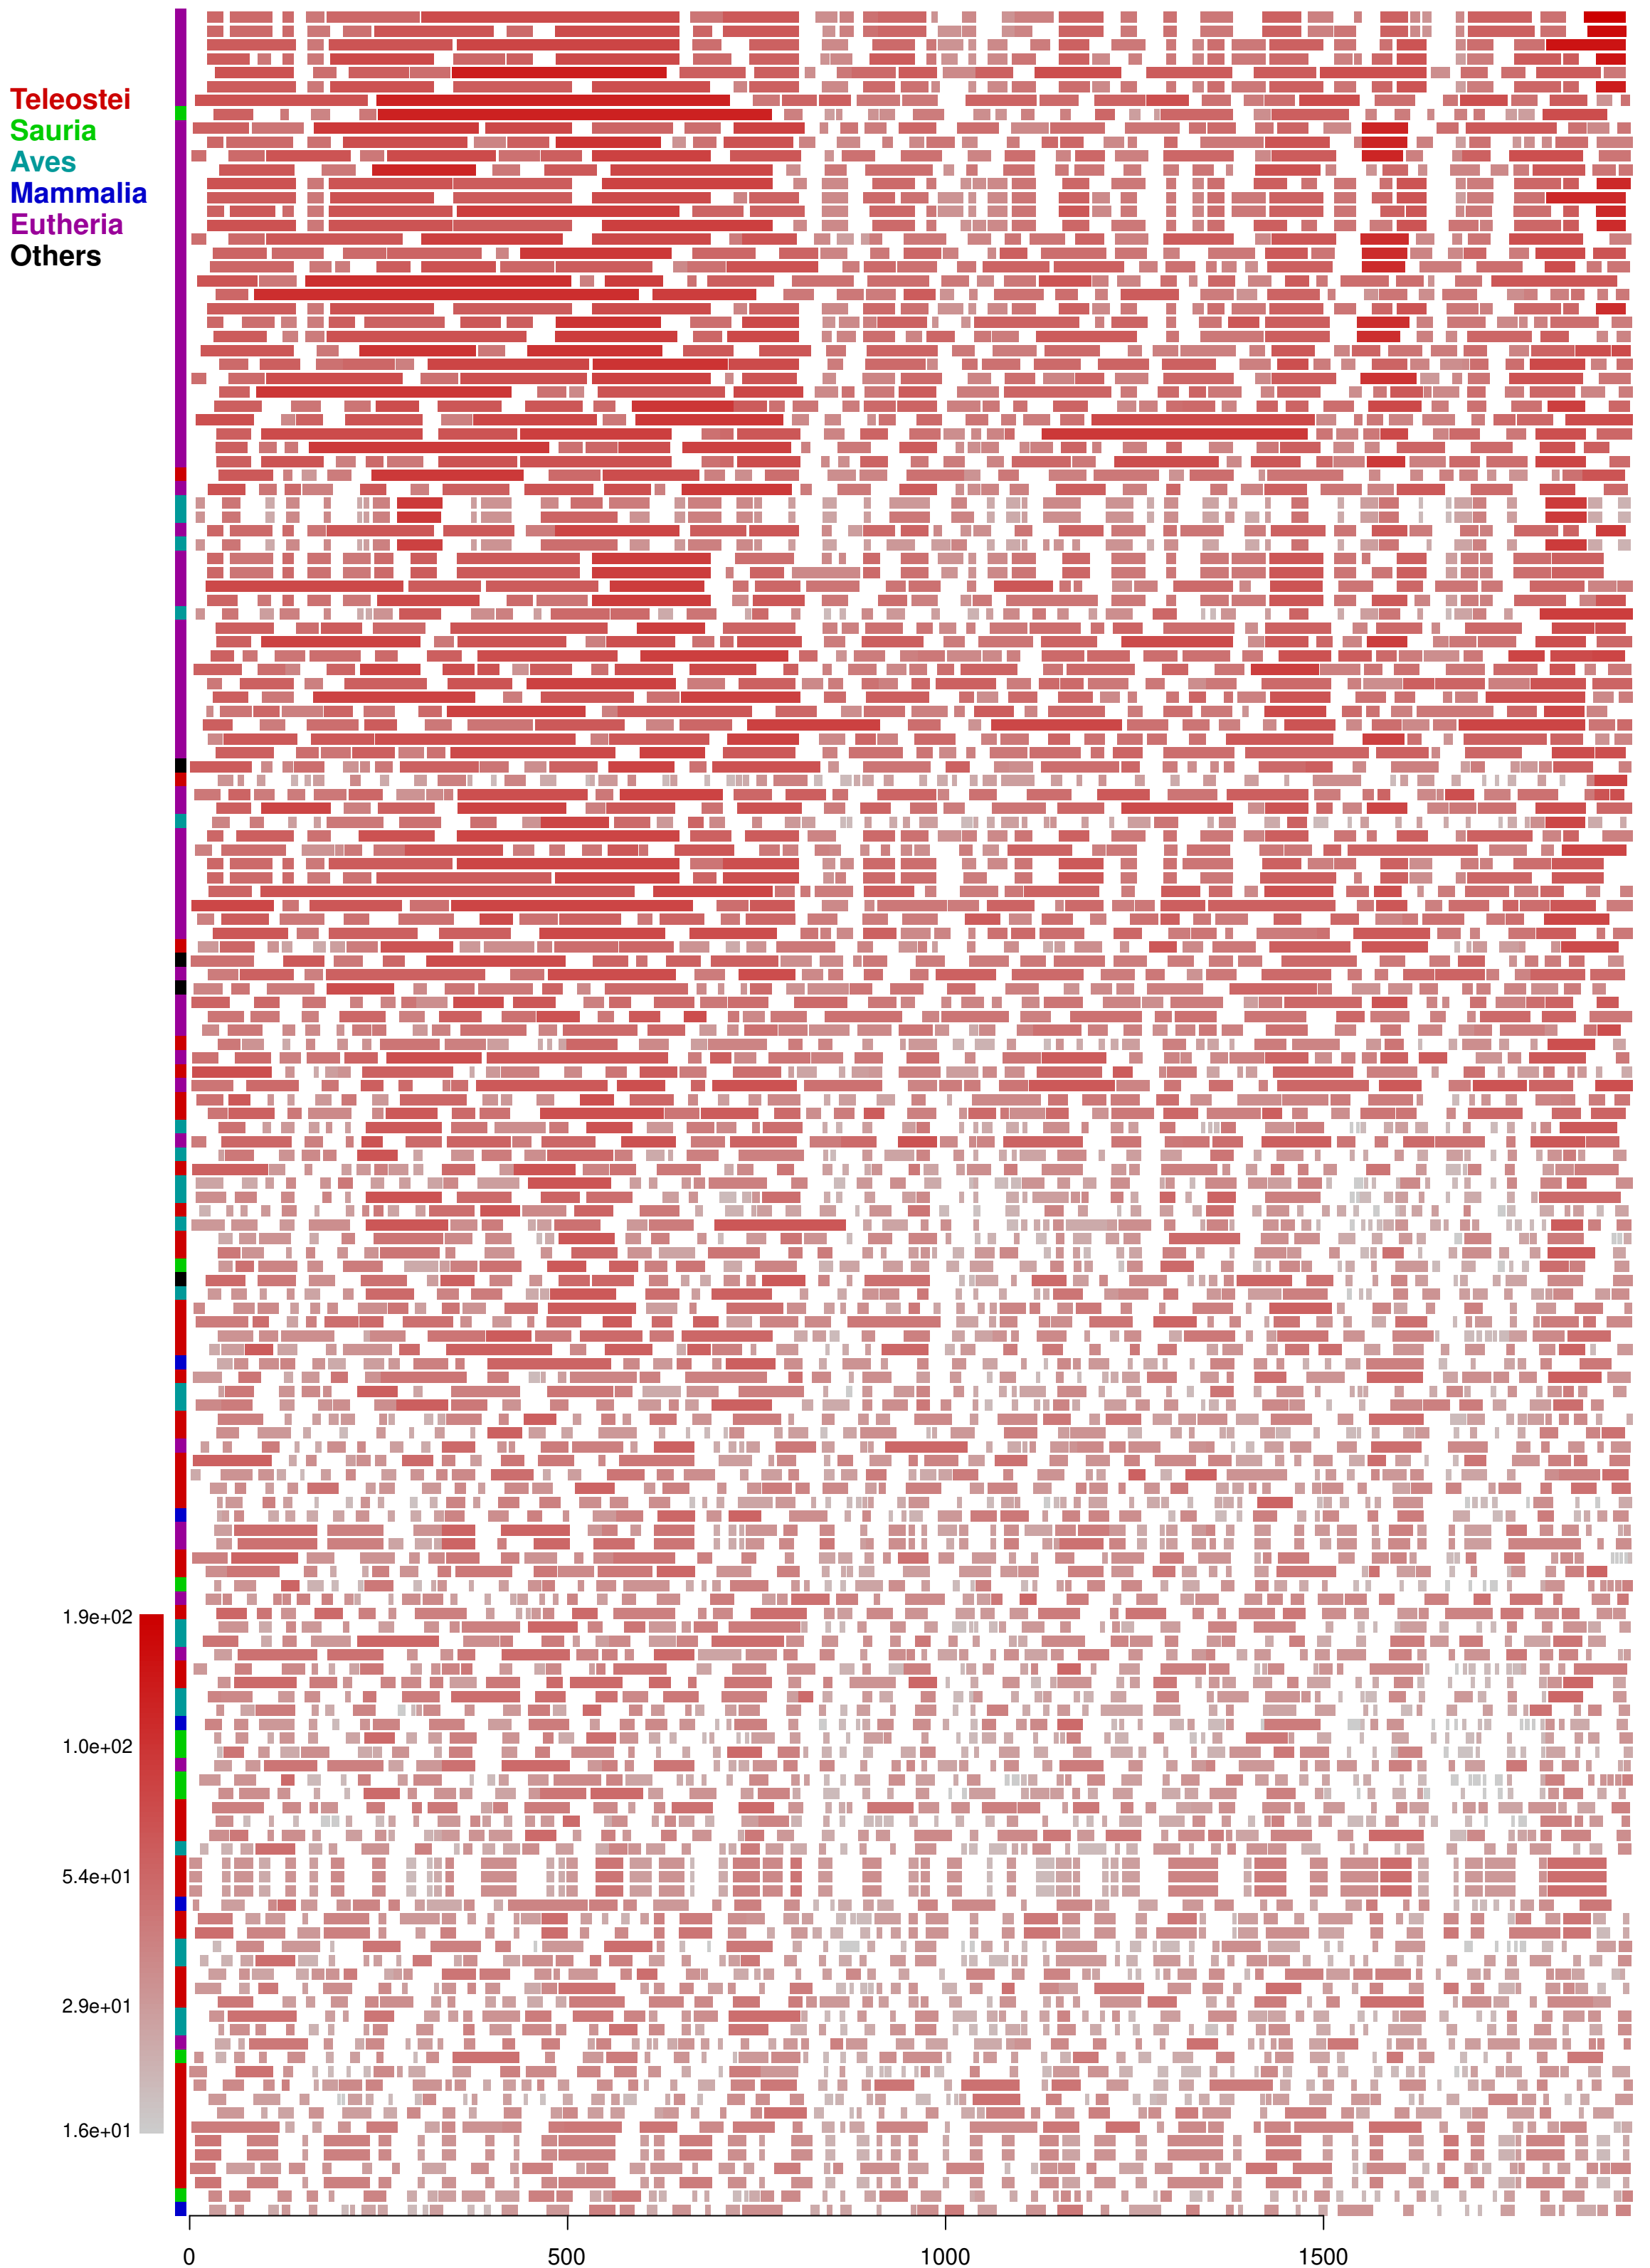

0 alignments above max size (1.0e+08)

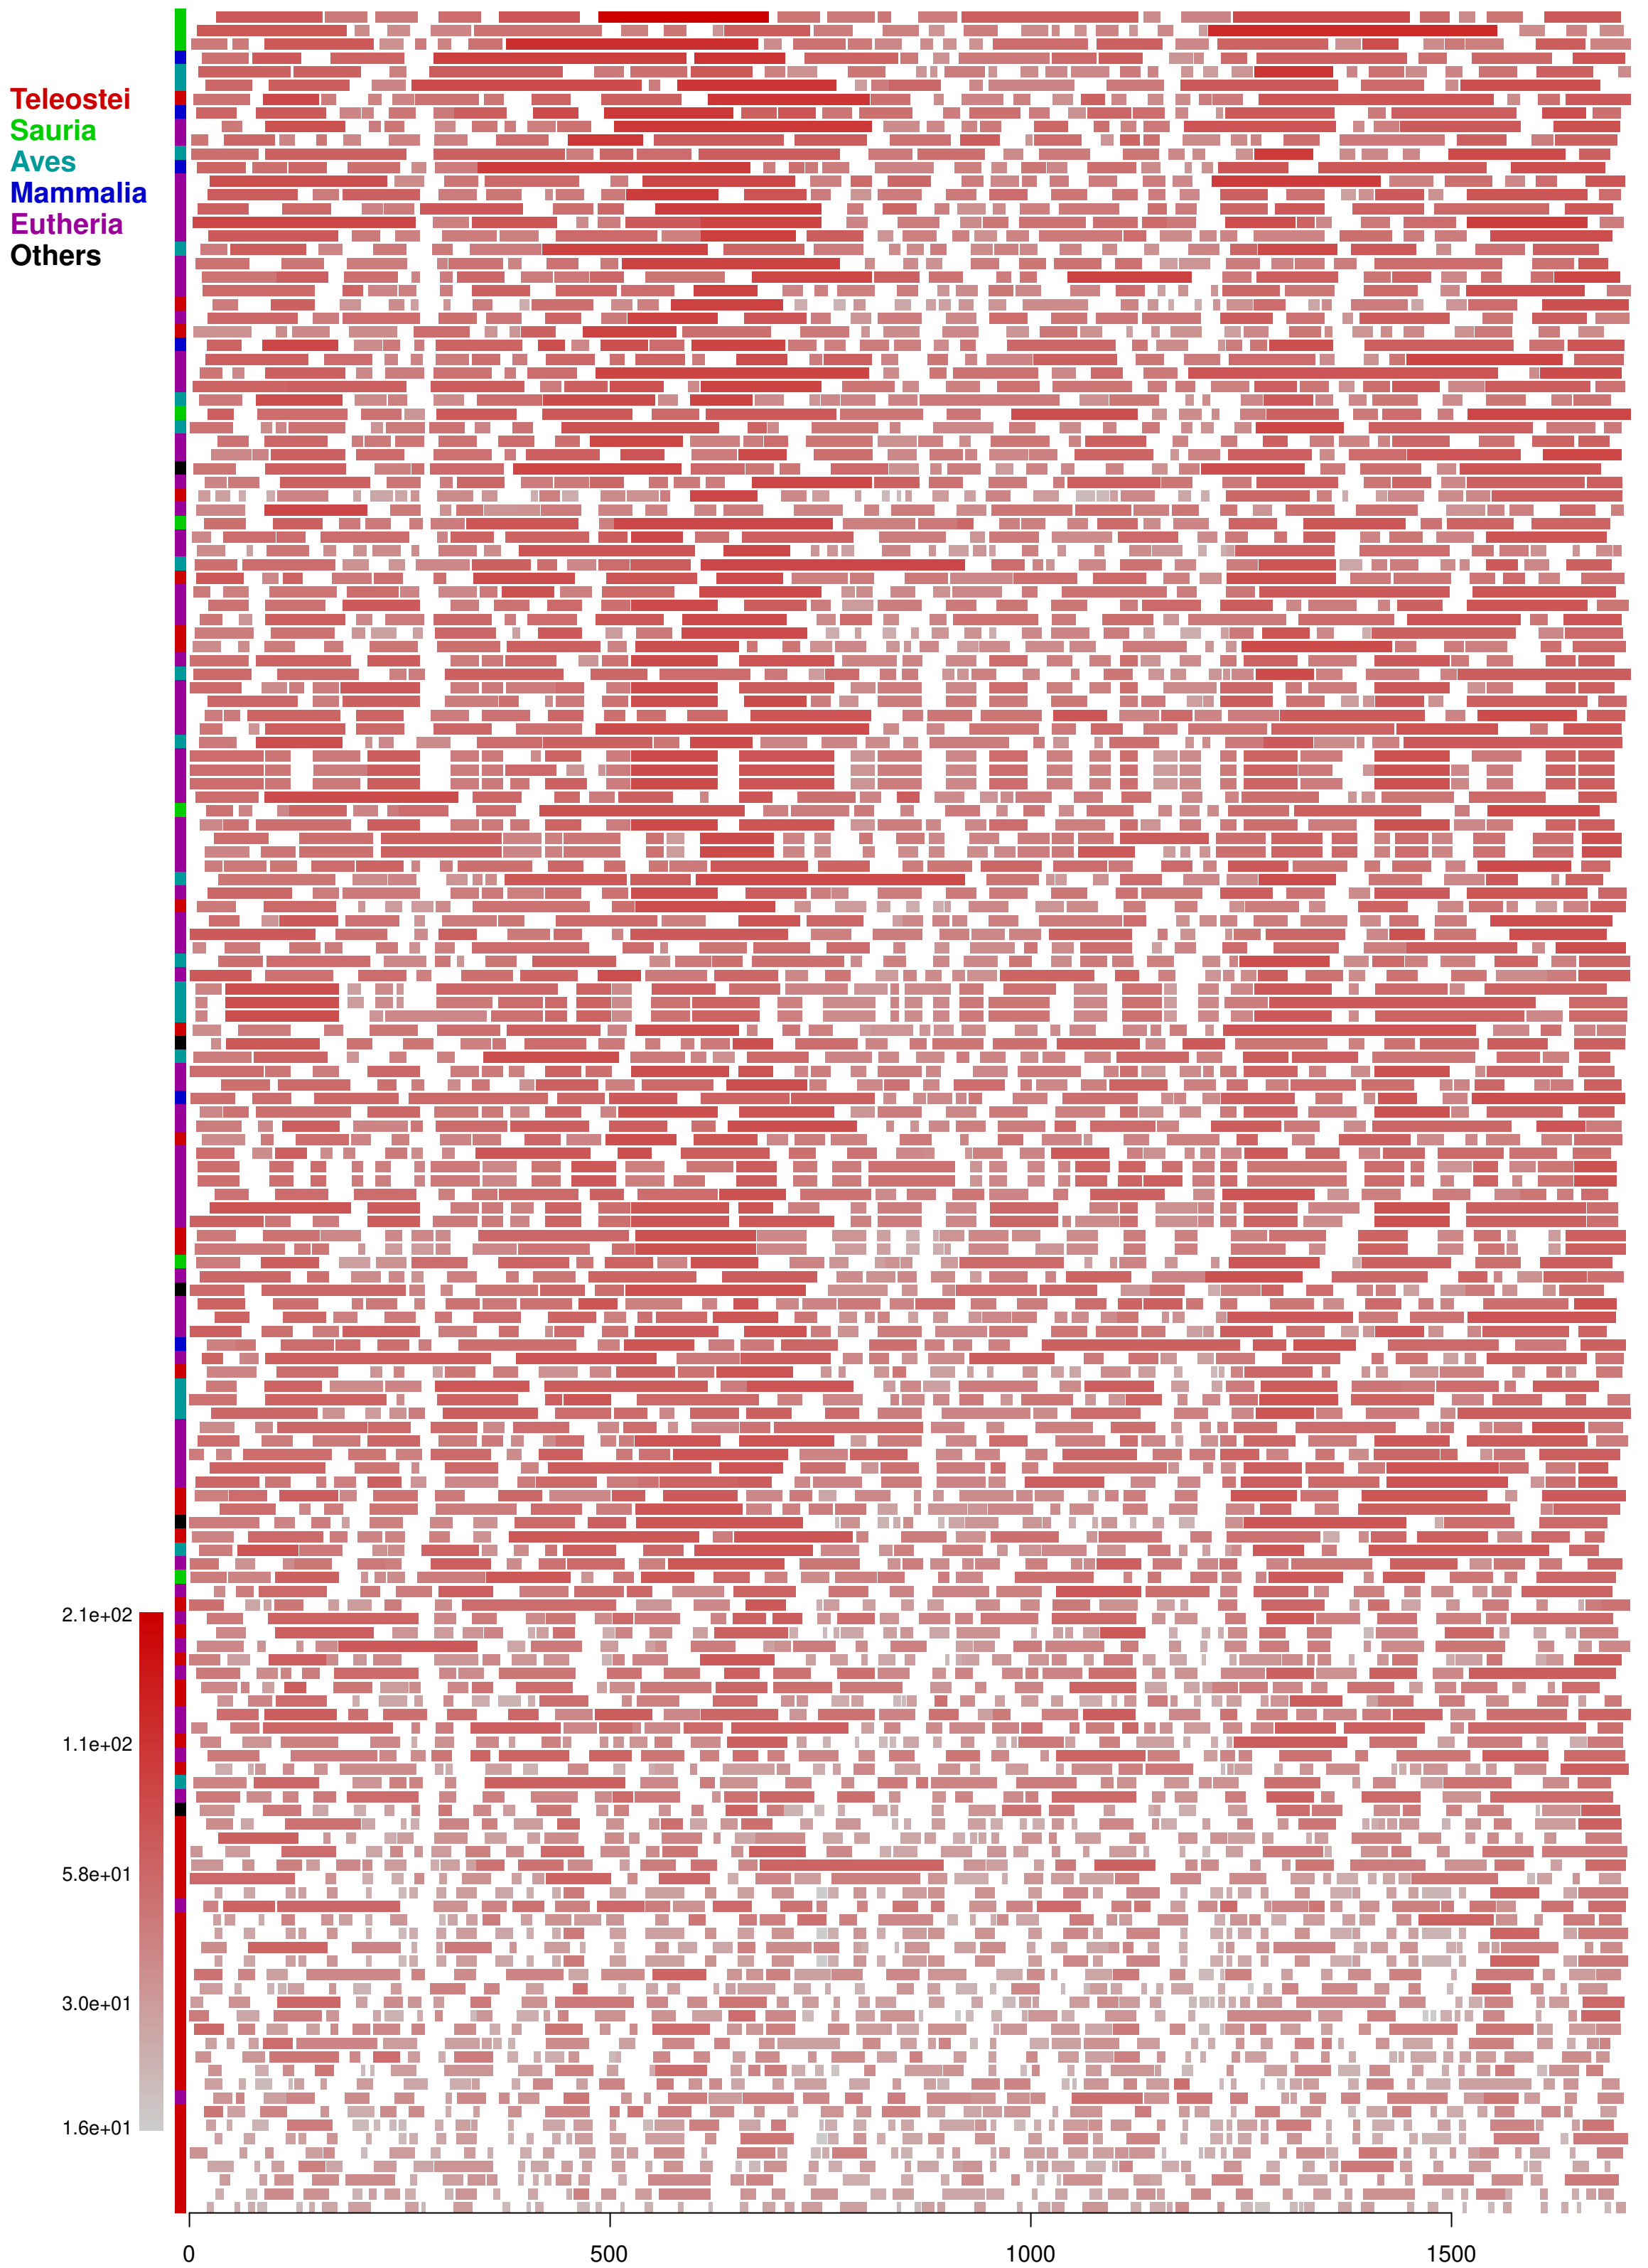

0 alignments above max size (1.0e+08)

Teleostei  
Sauria  
Aves  
Mammalia  
Eutheria  
Others

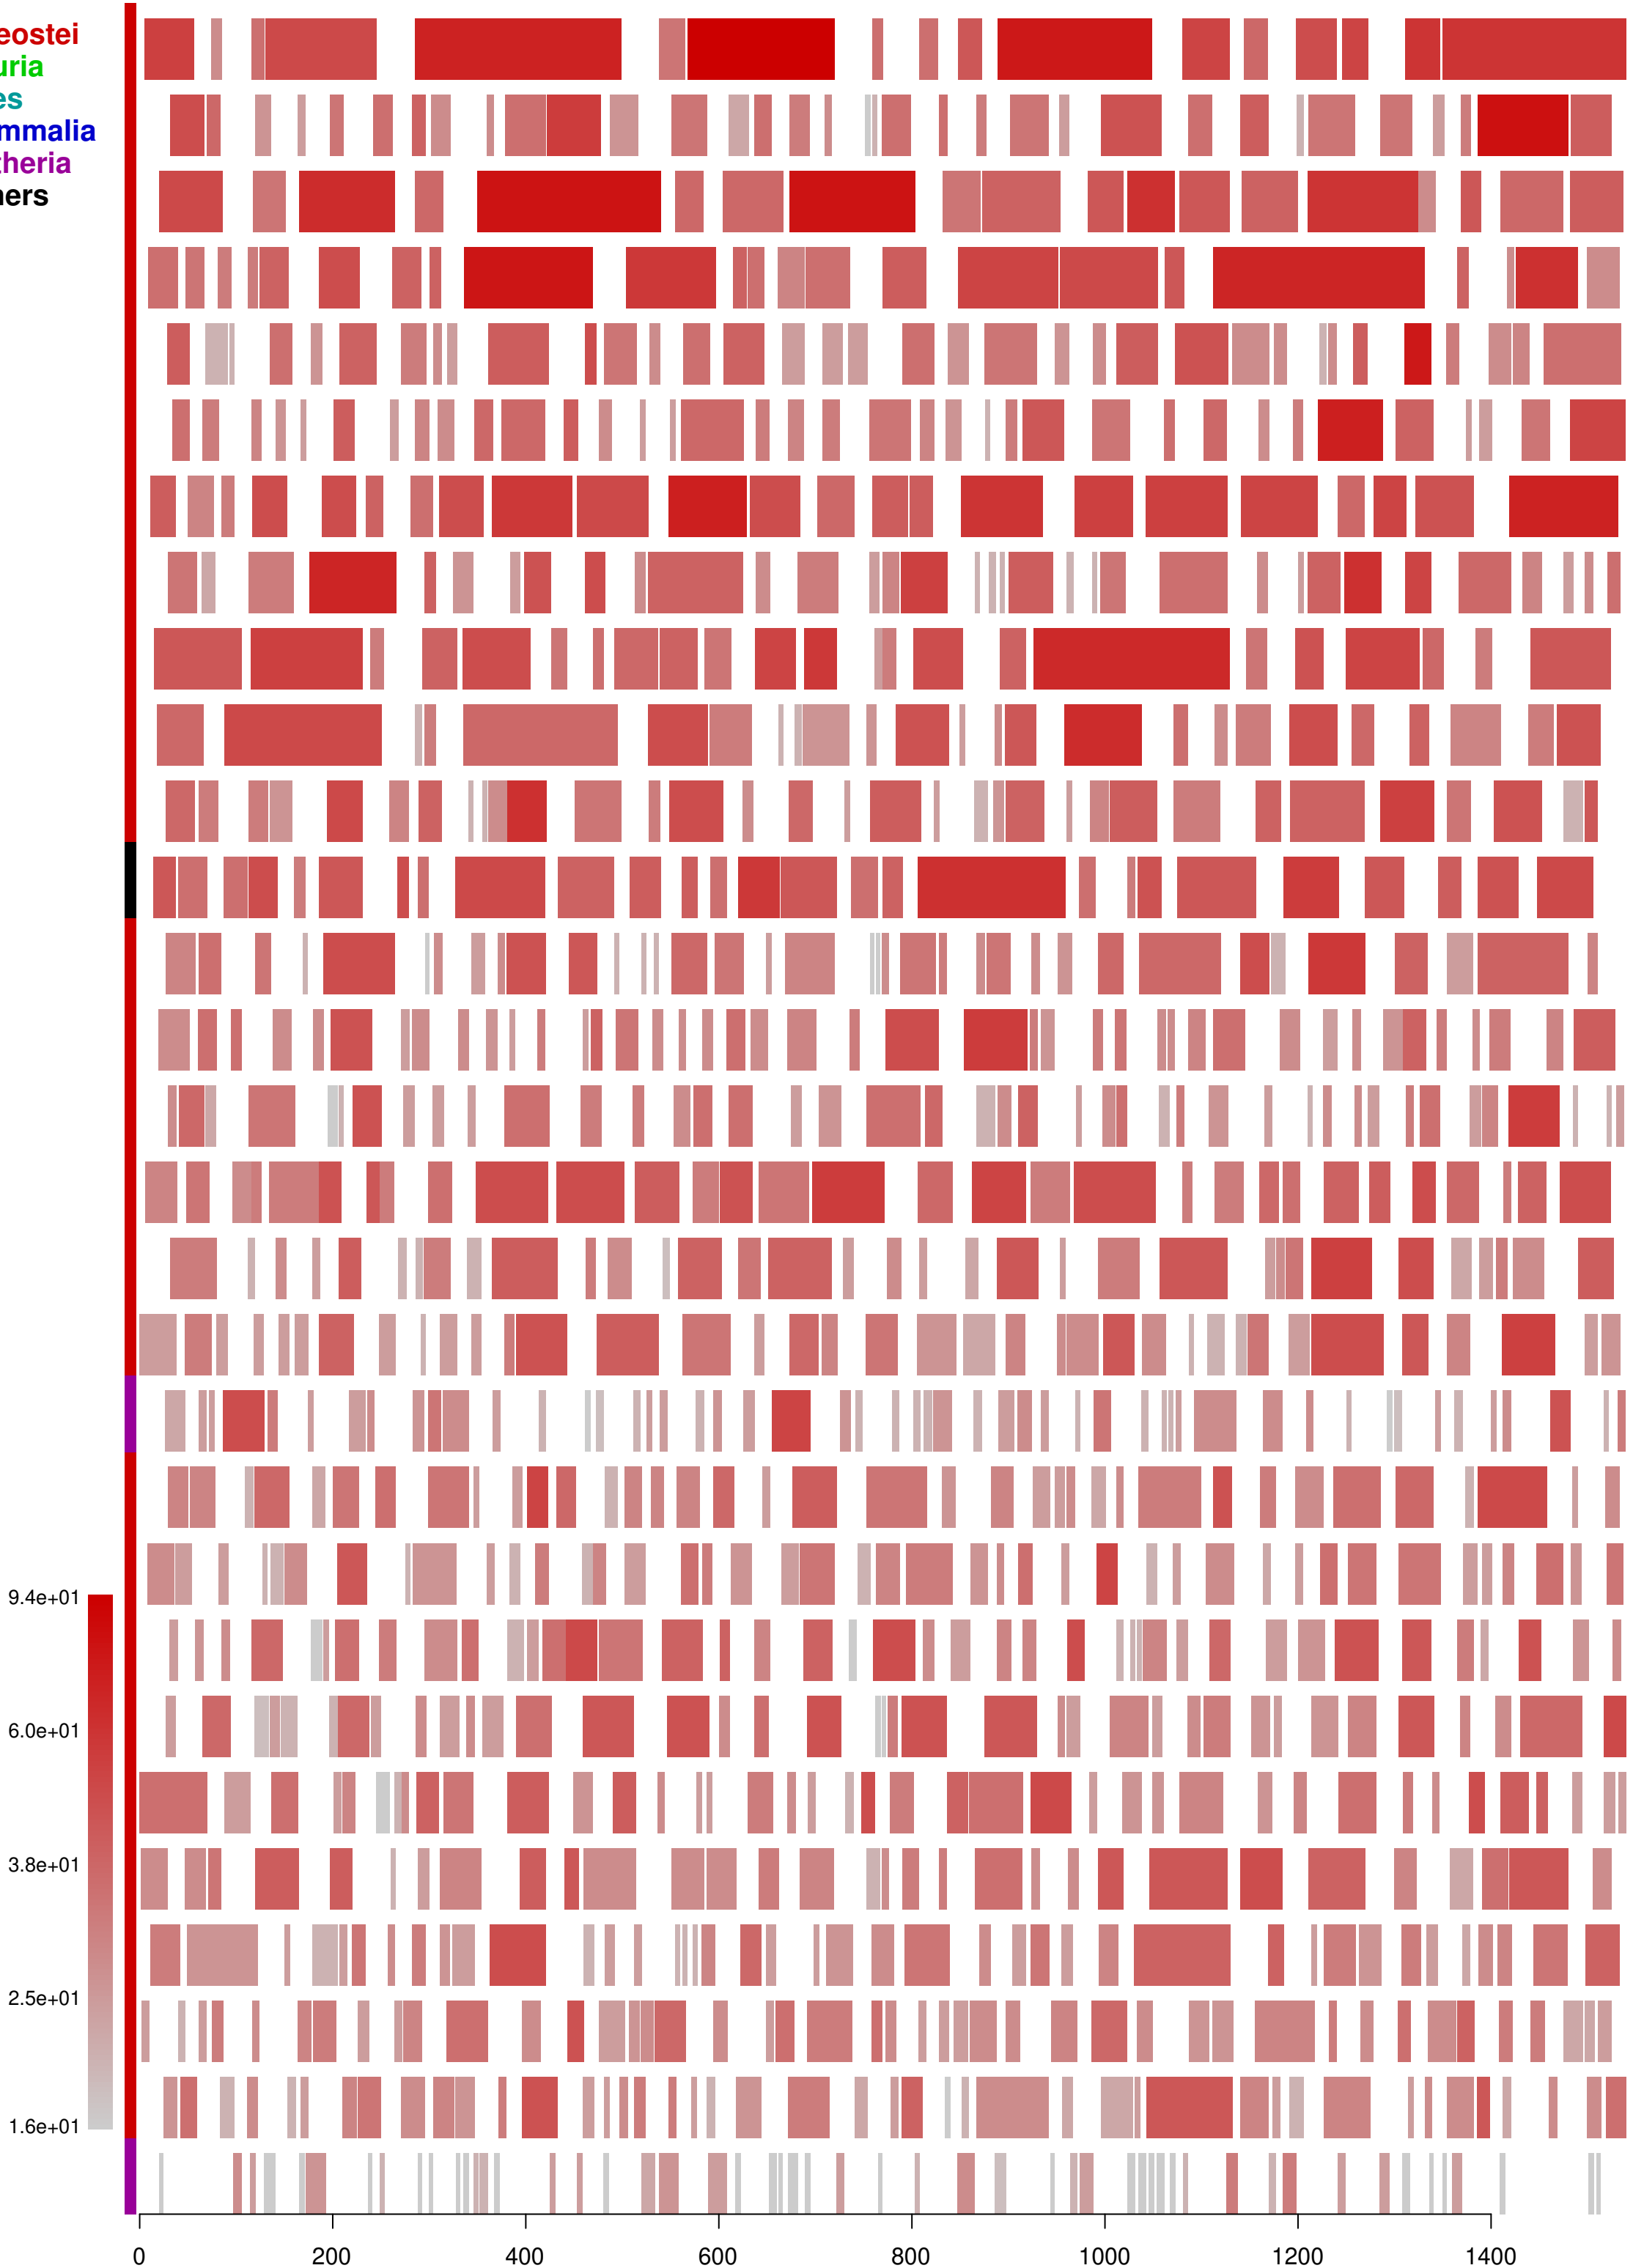

0 alignments above max size (1.0e+08)

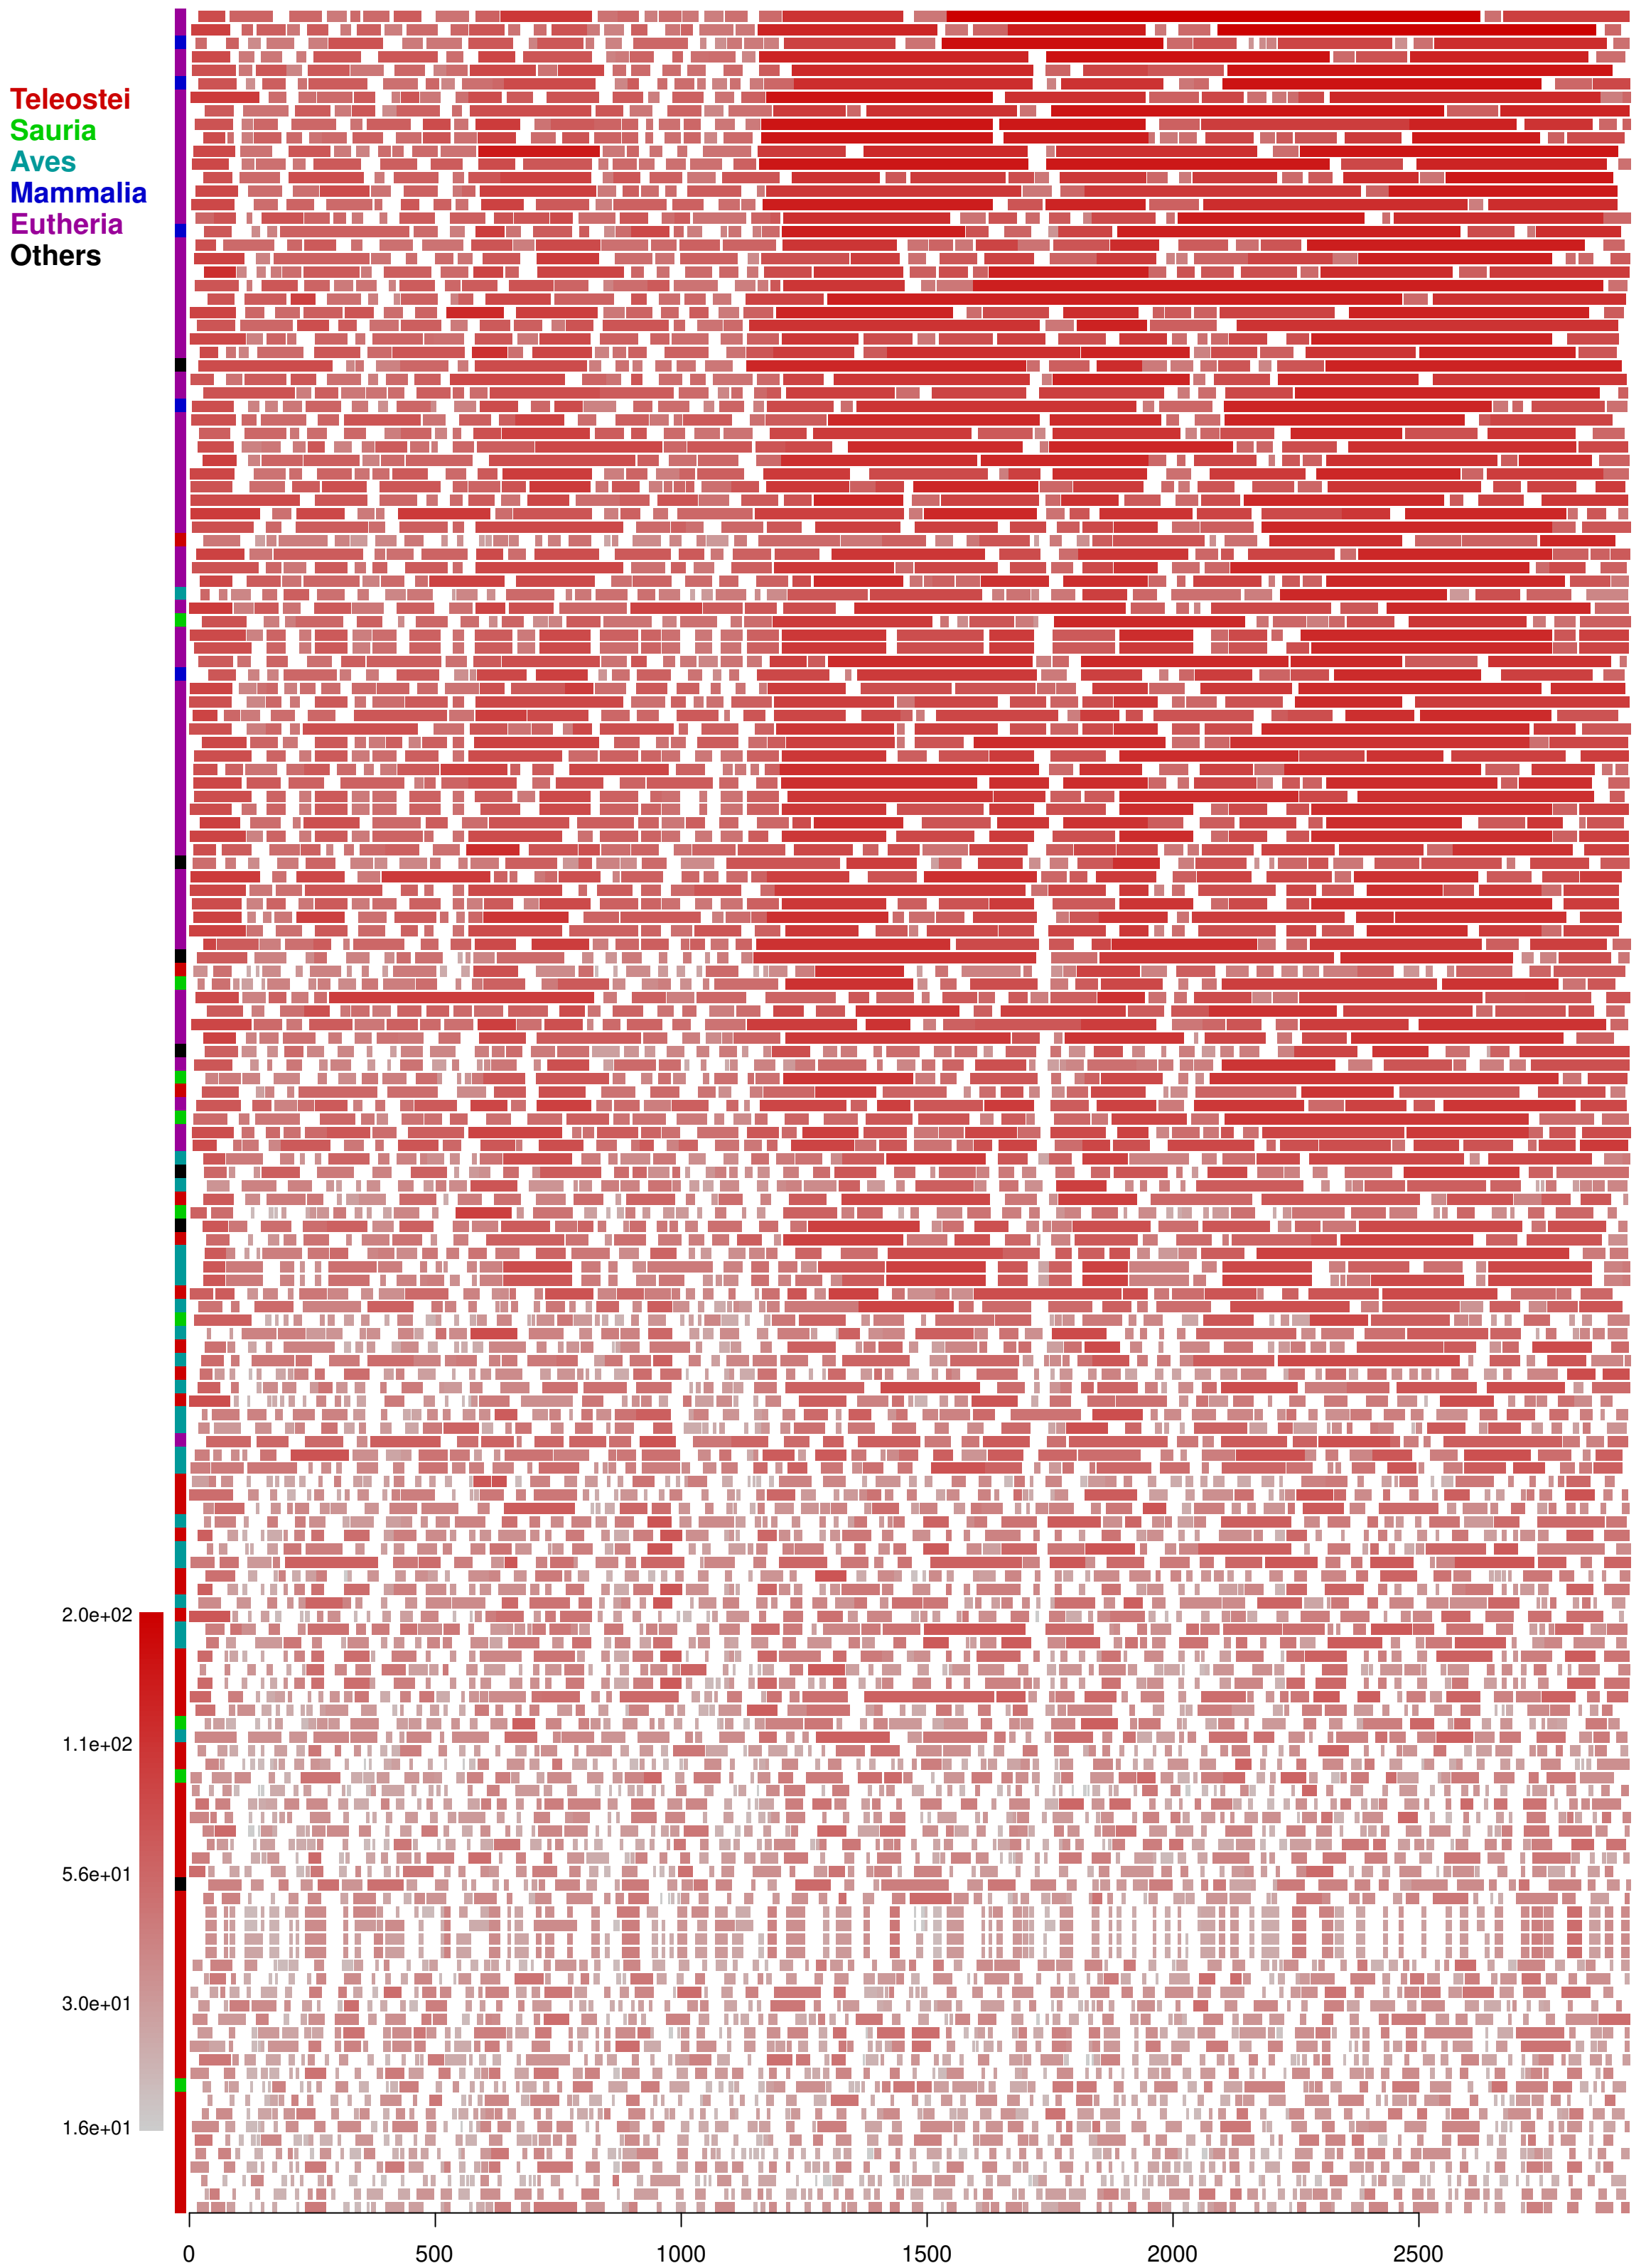

0 alignments above max size (1.0e+08)

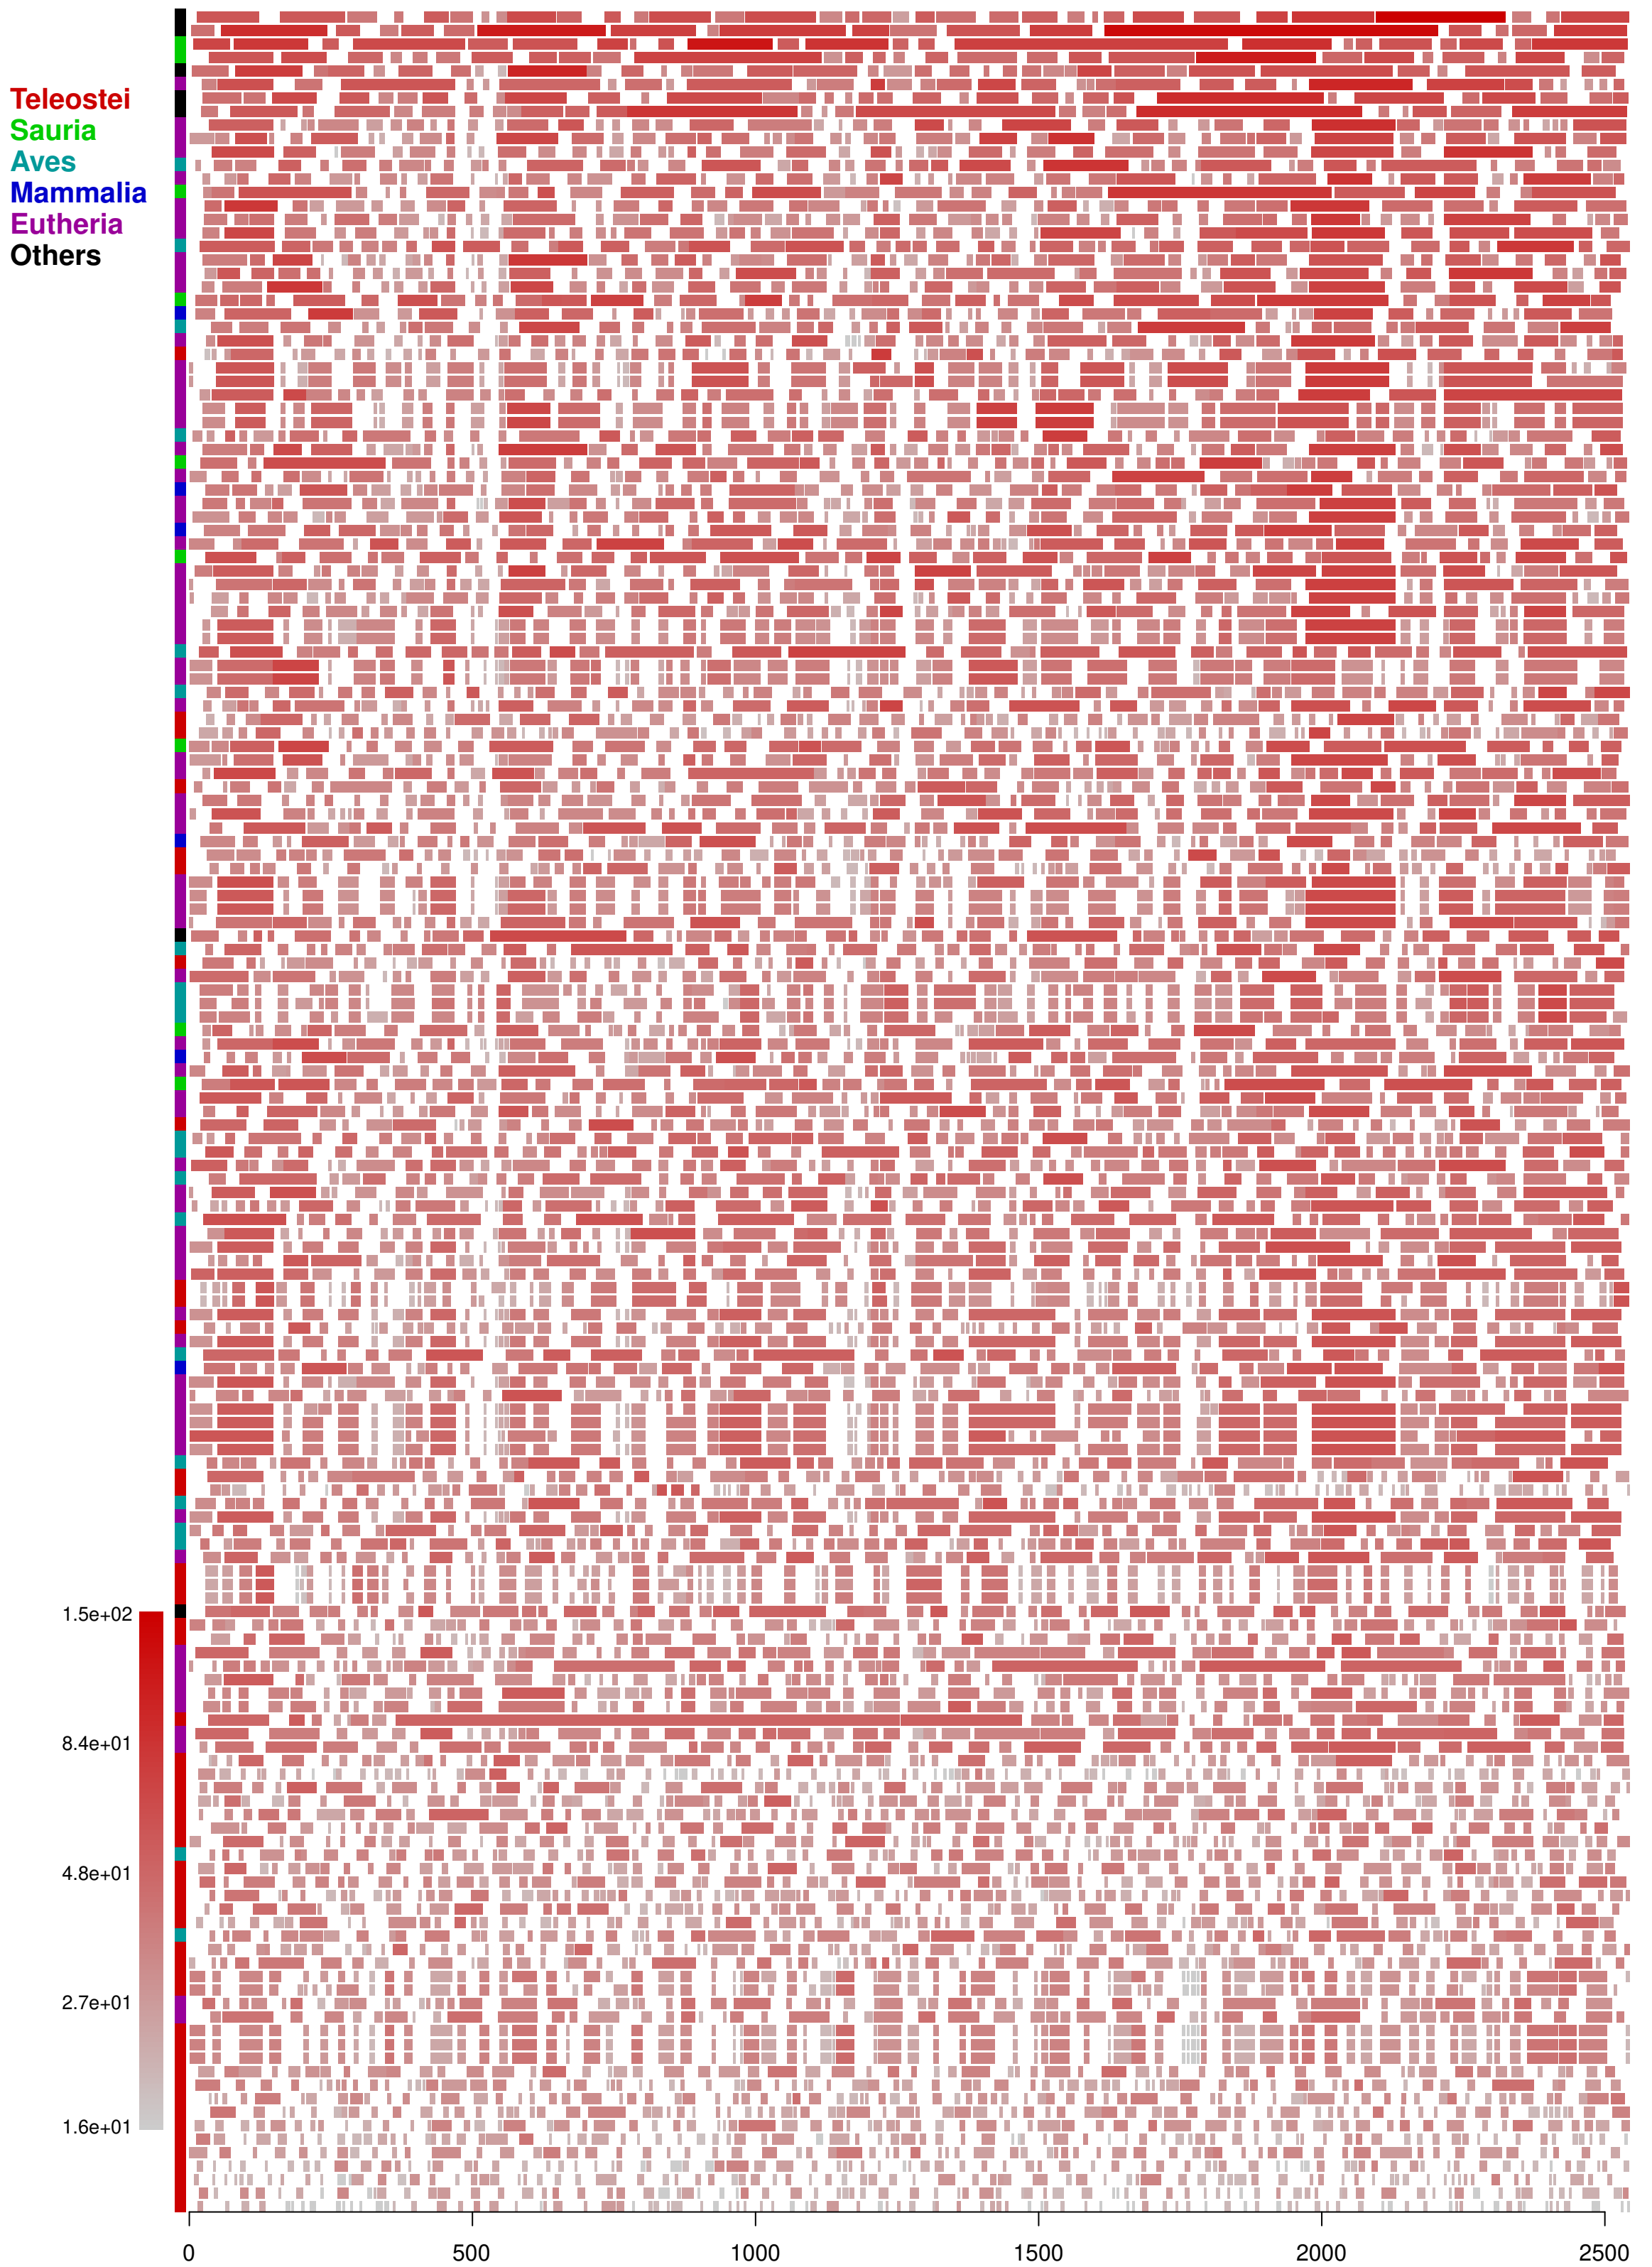

0 alignments above max size (1.0e+08)



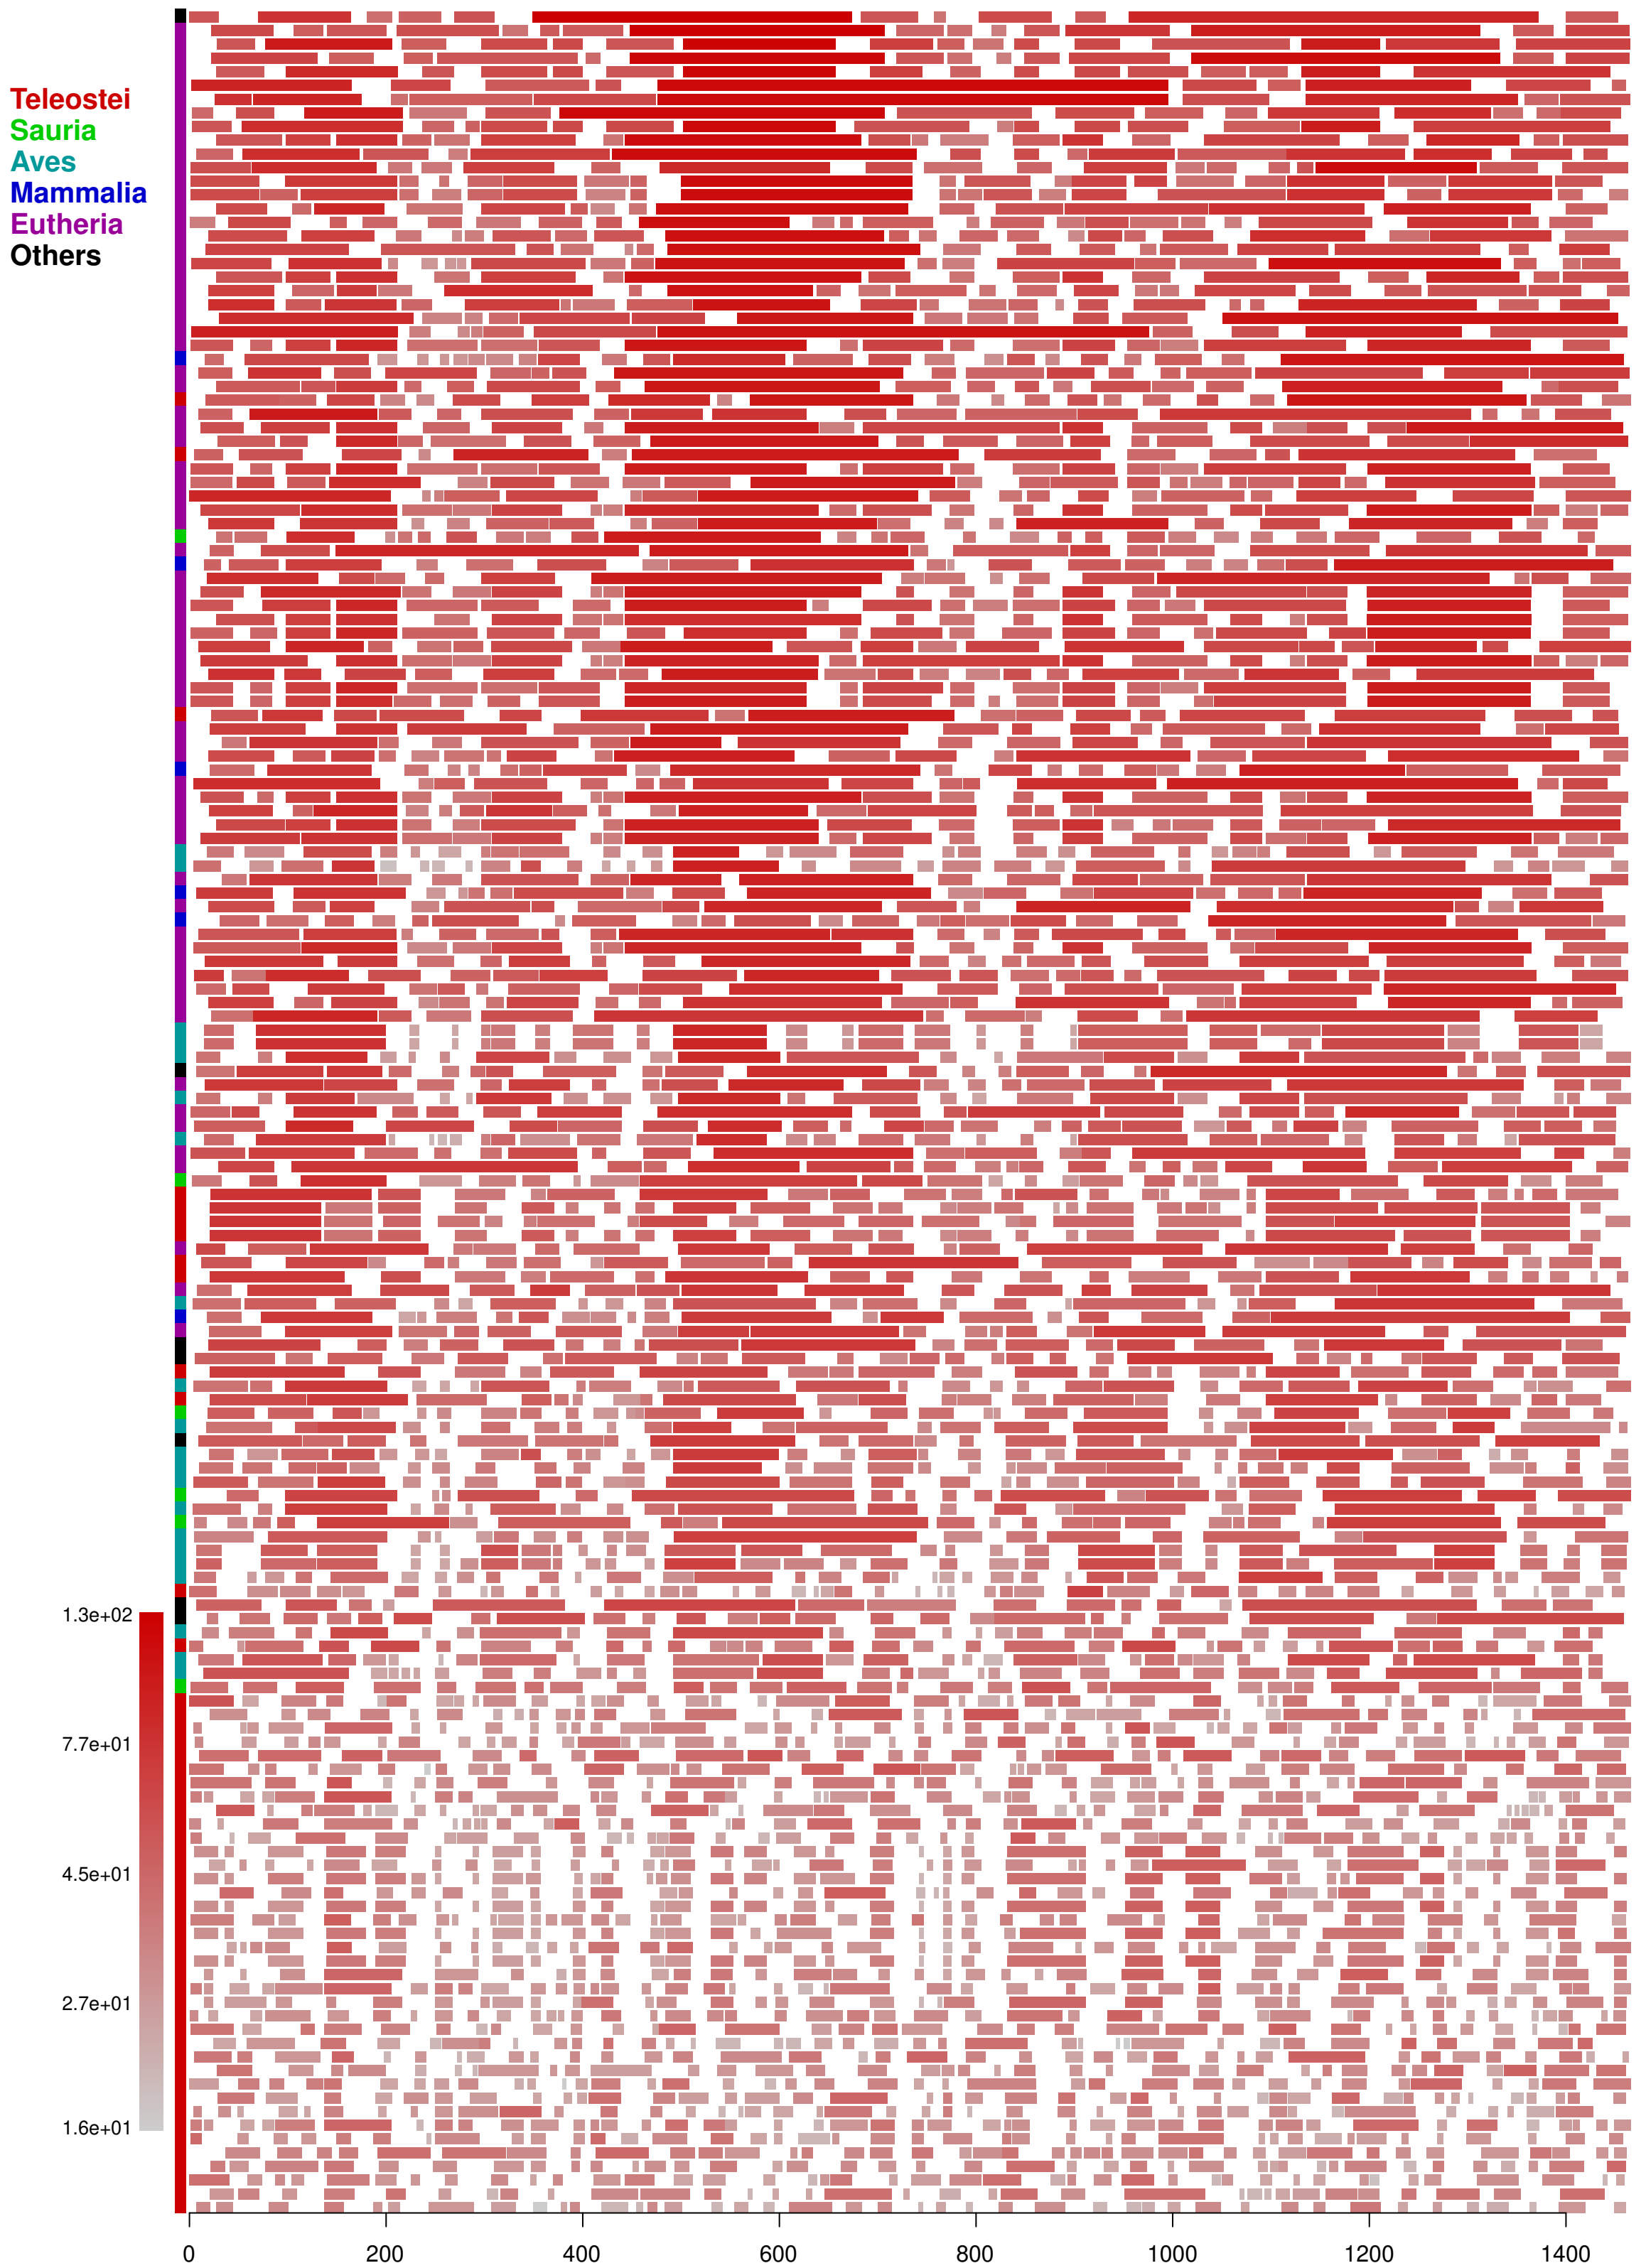

0 alignments above max size (1.0e+08)

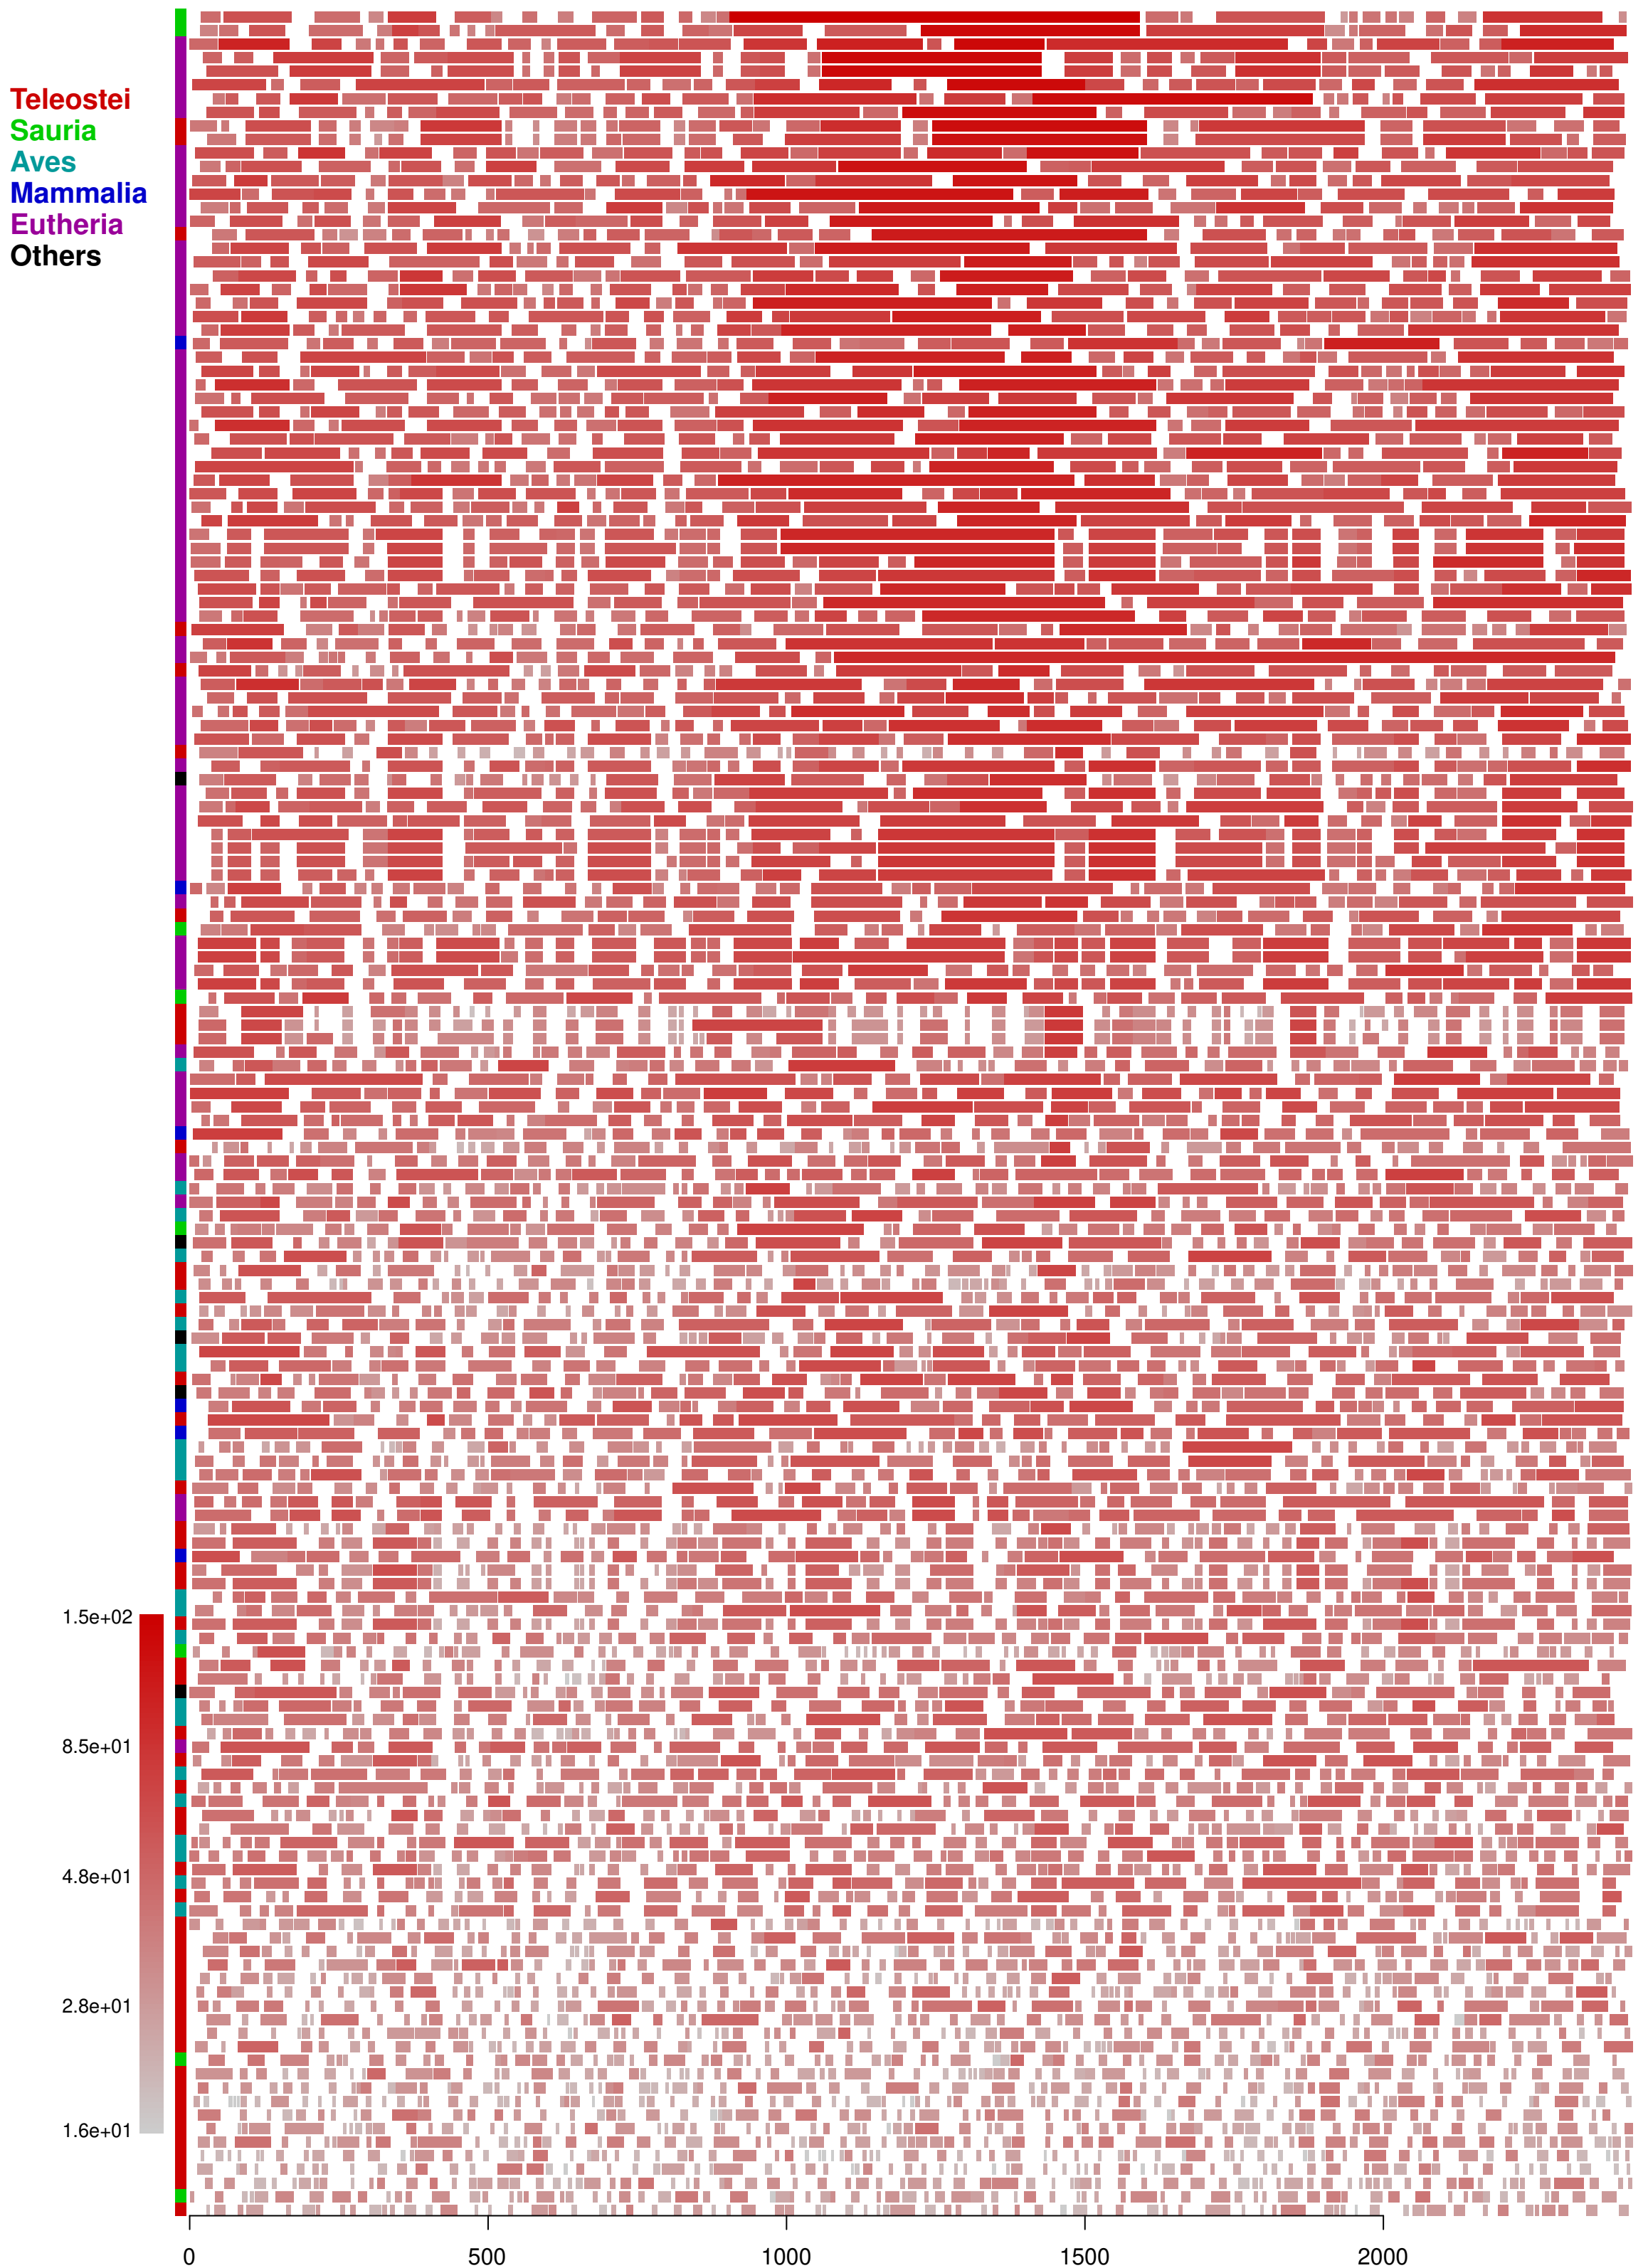

1 alignments above max size (1.0e+08)

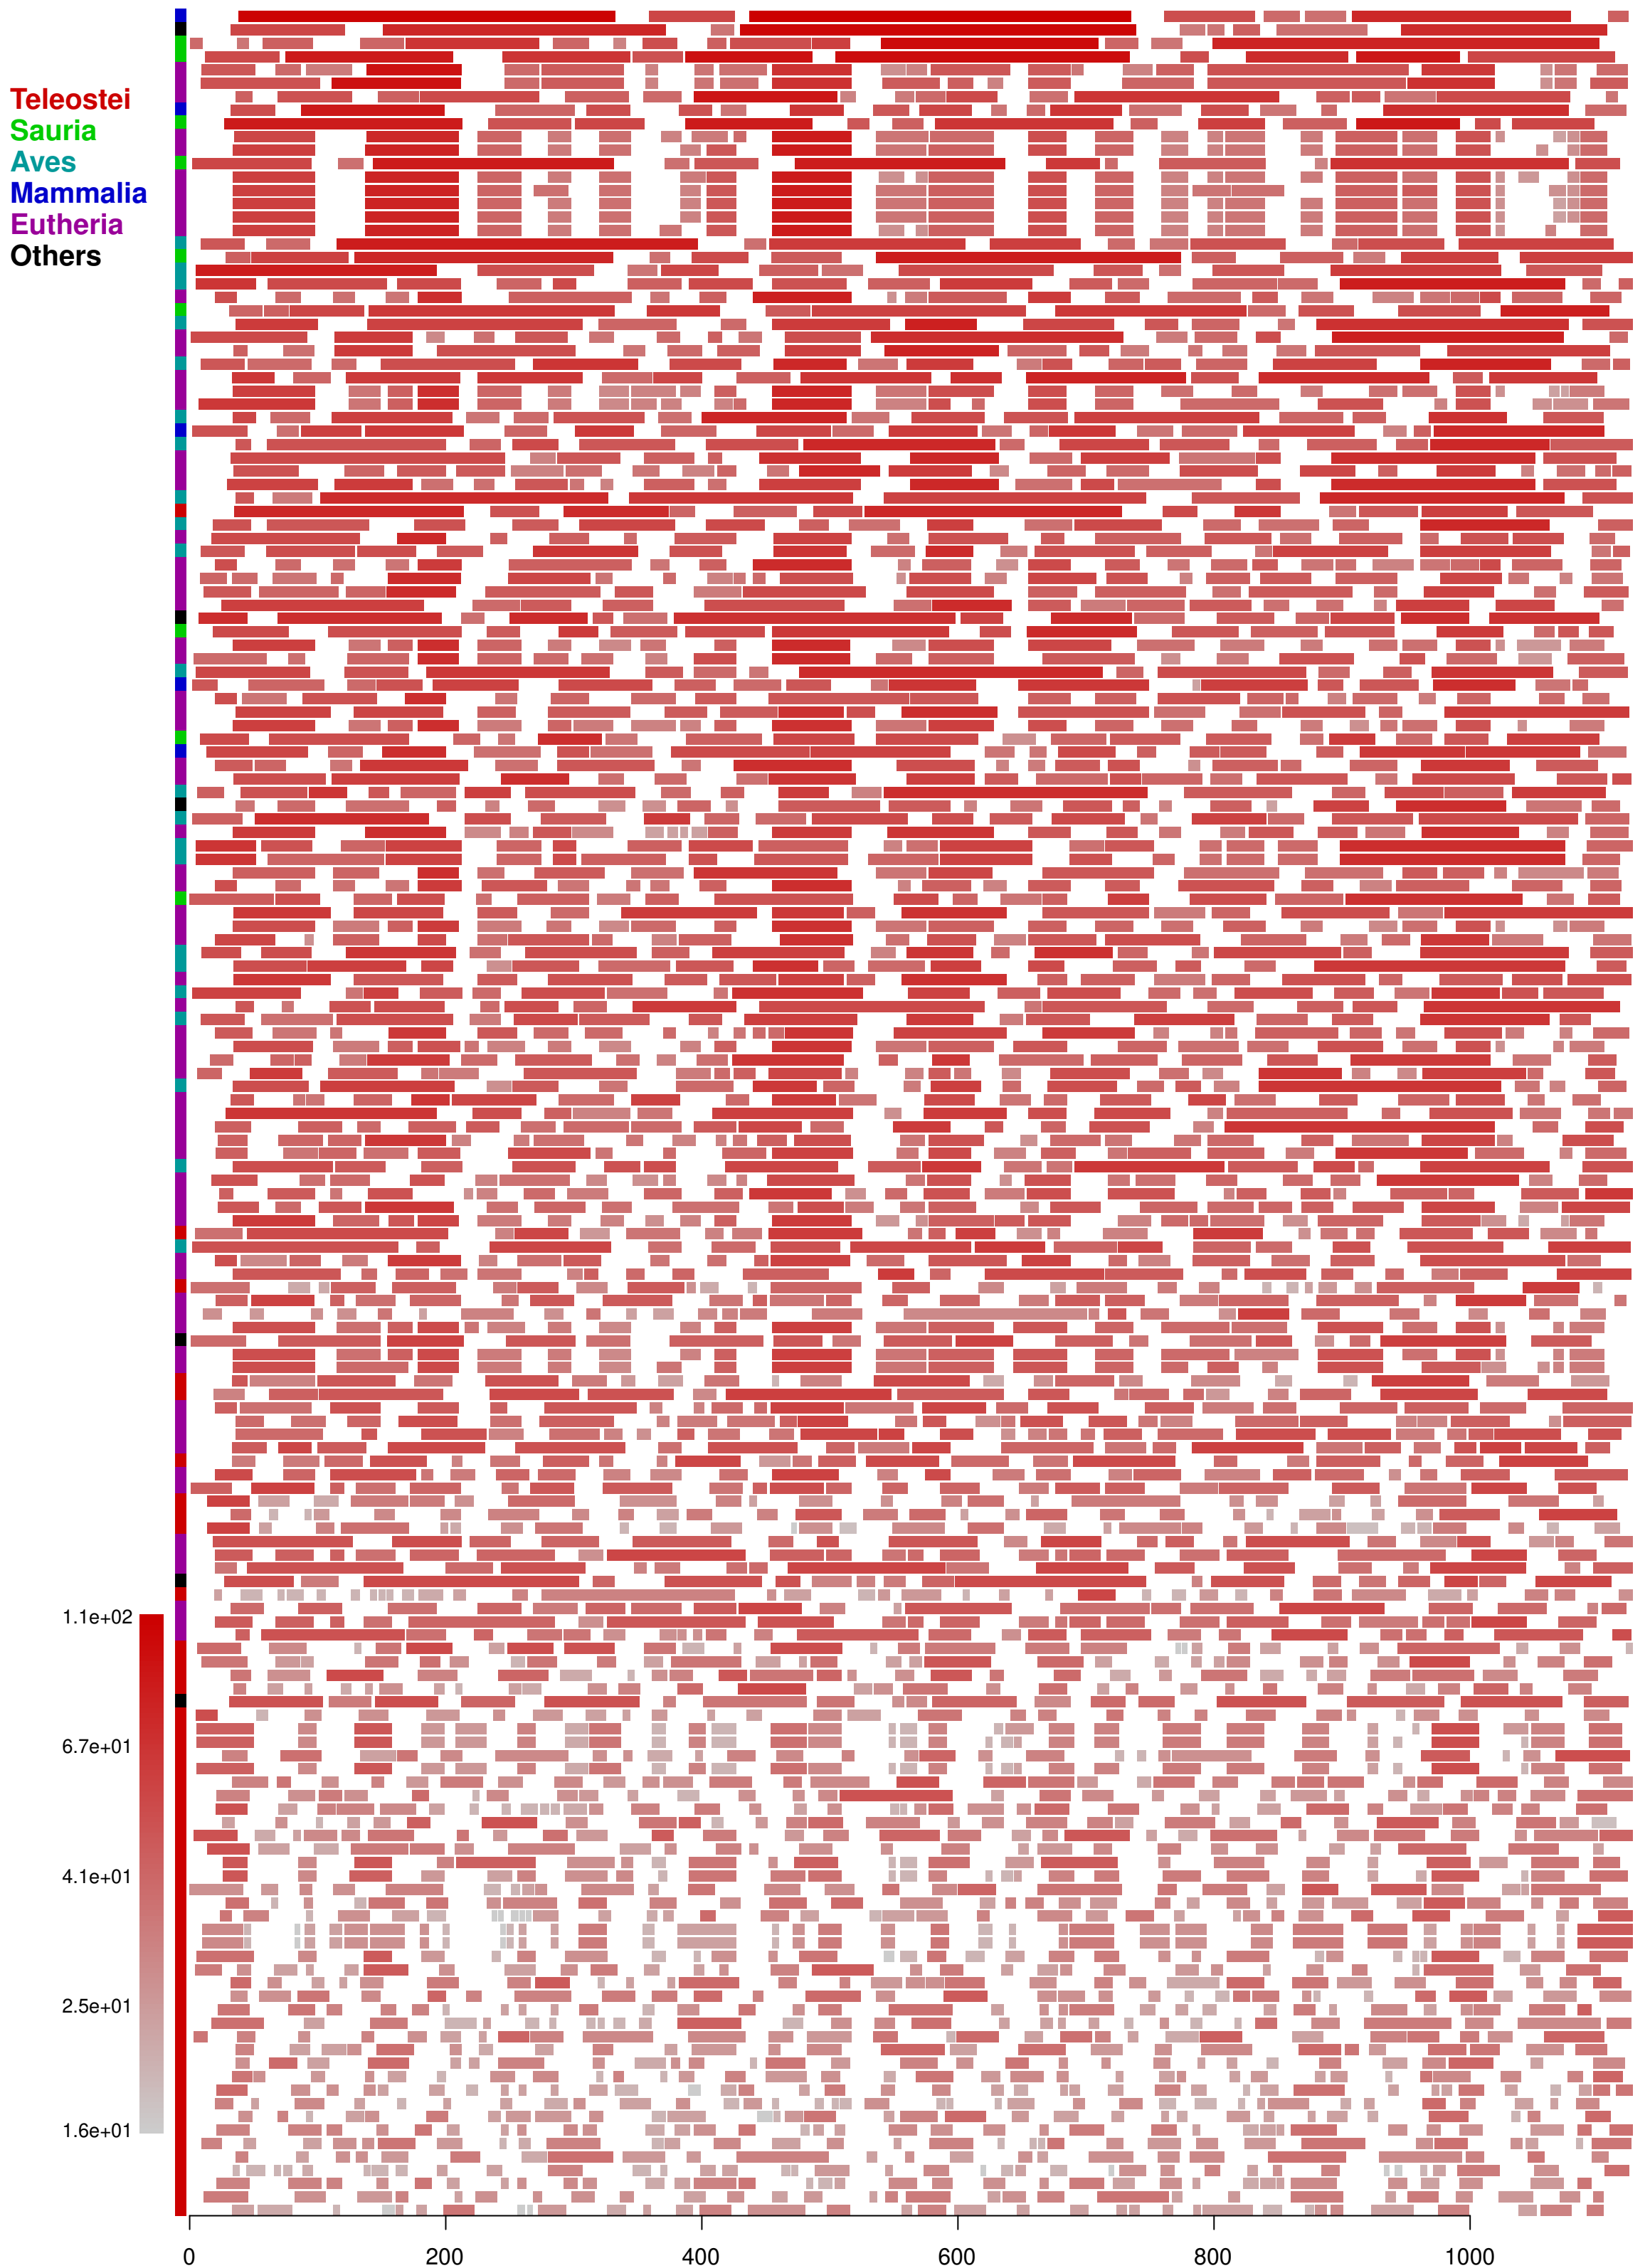

0 alignments above max size (1.0e+08)

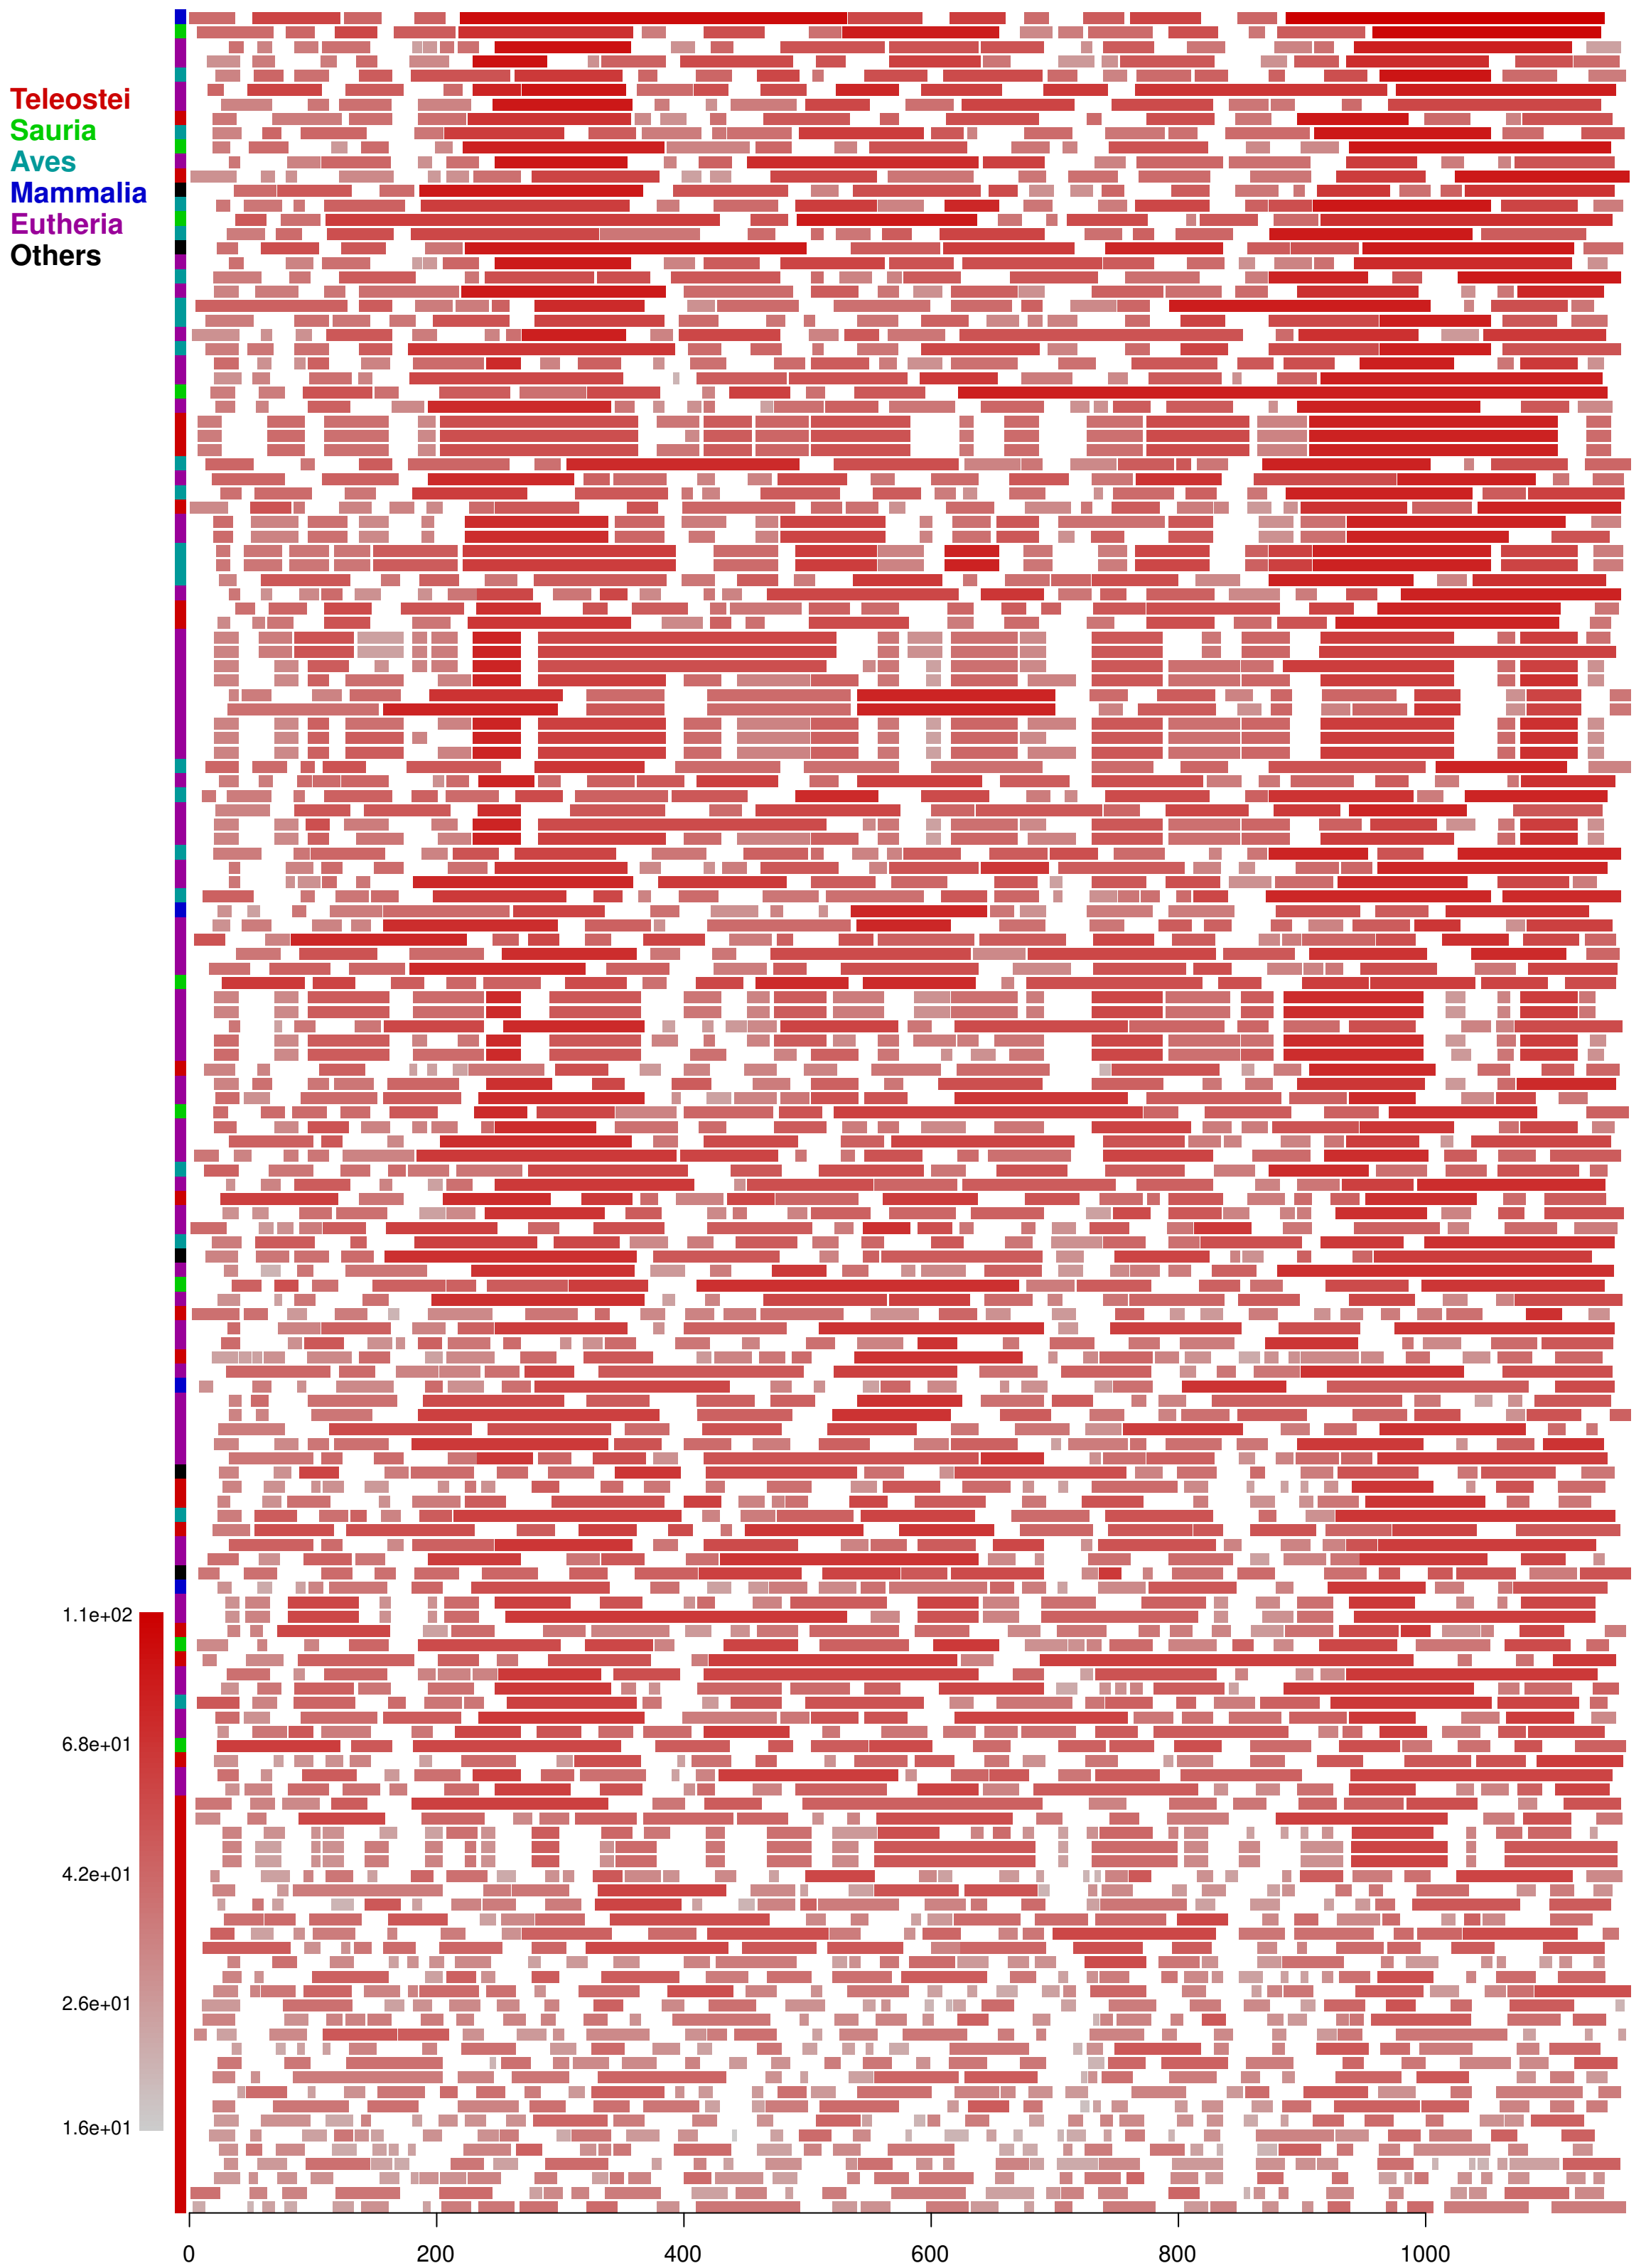

1 alignments above max size (1.0e+08)

Teleostei  
Sauria  
Aves  
Mammalia  
Eutheria  
Others

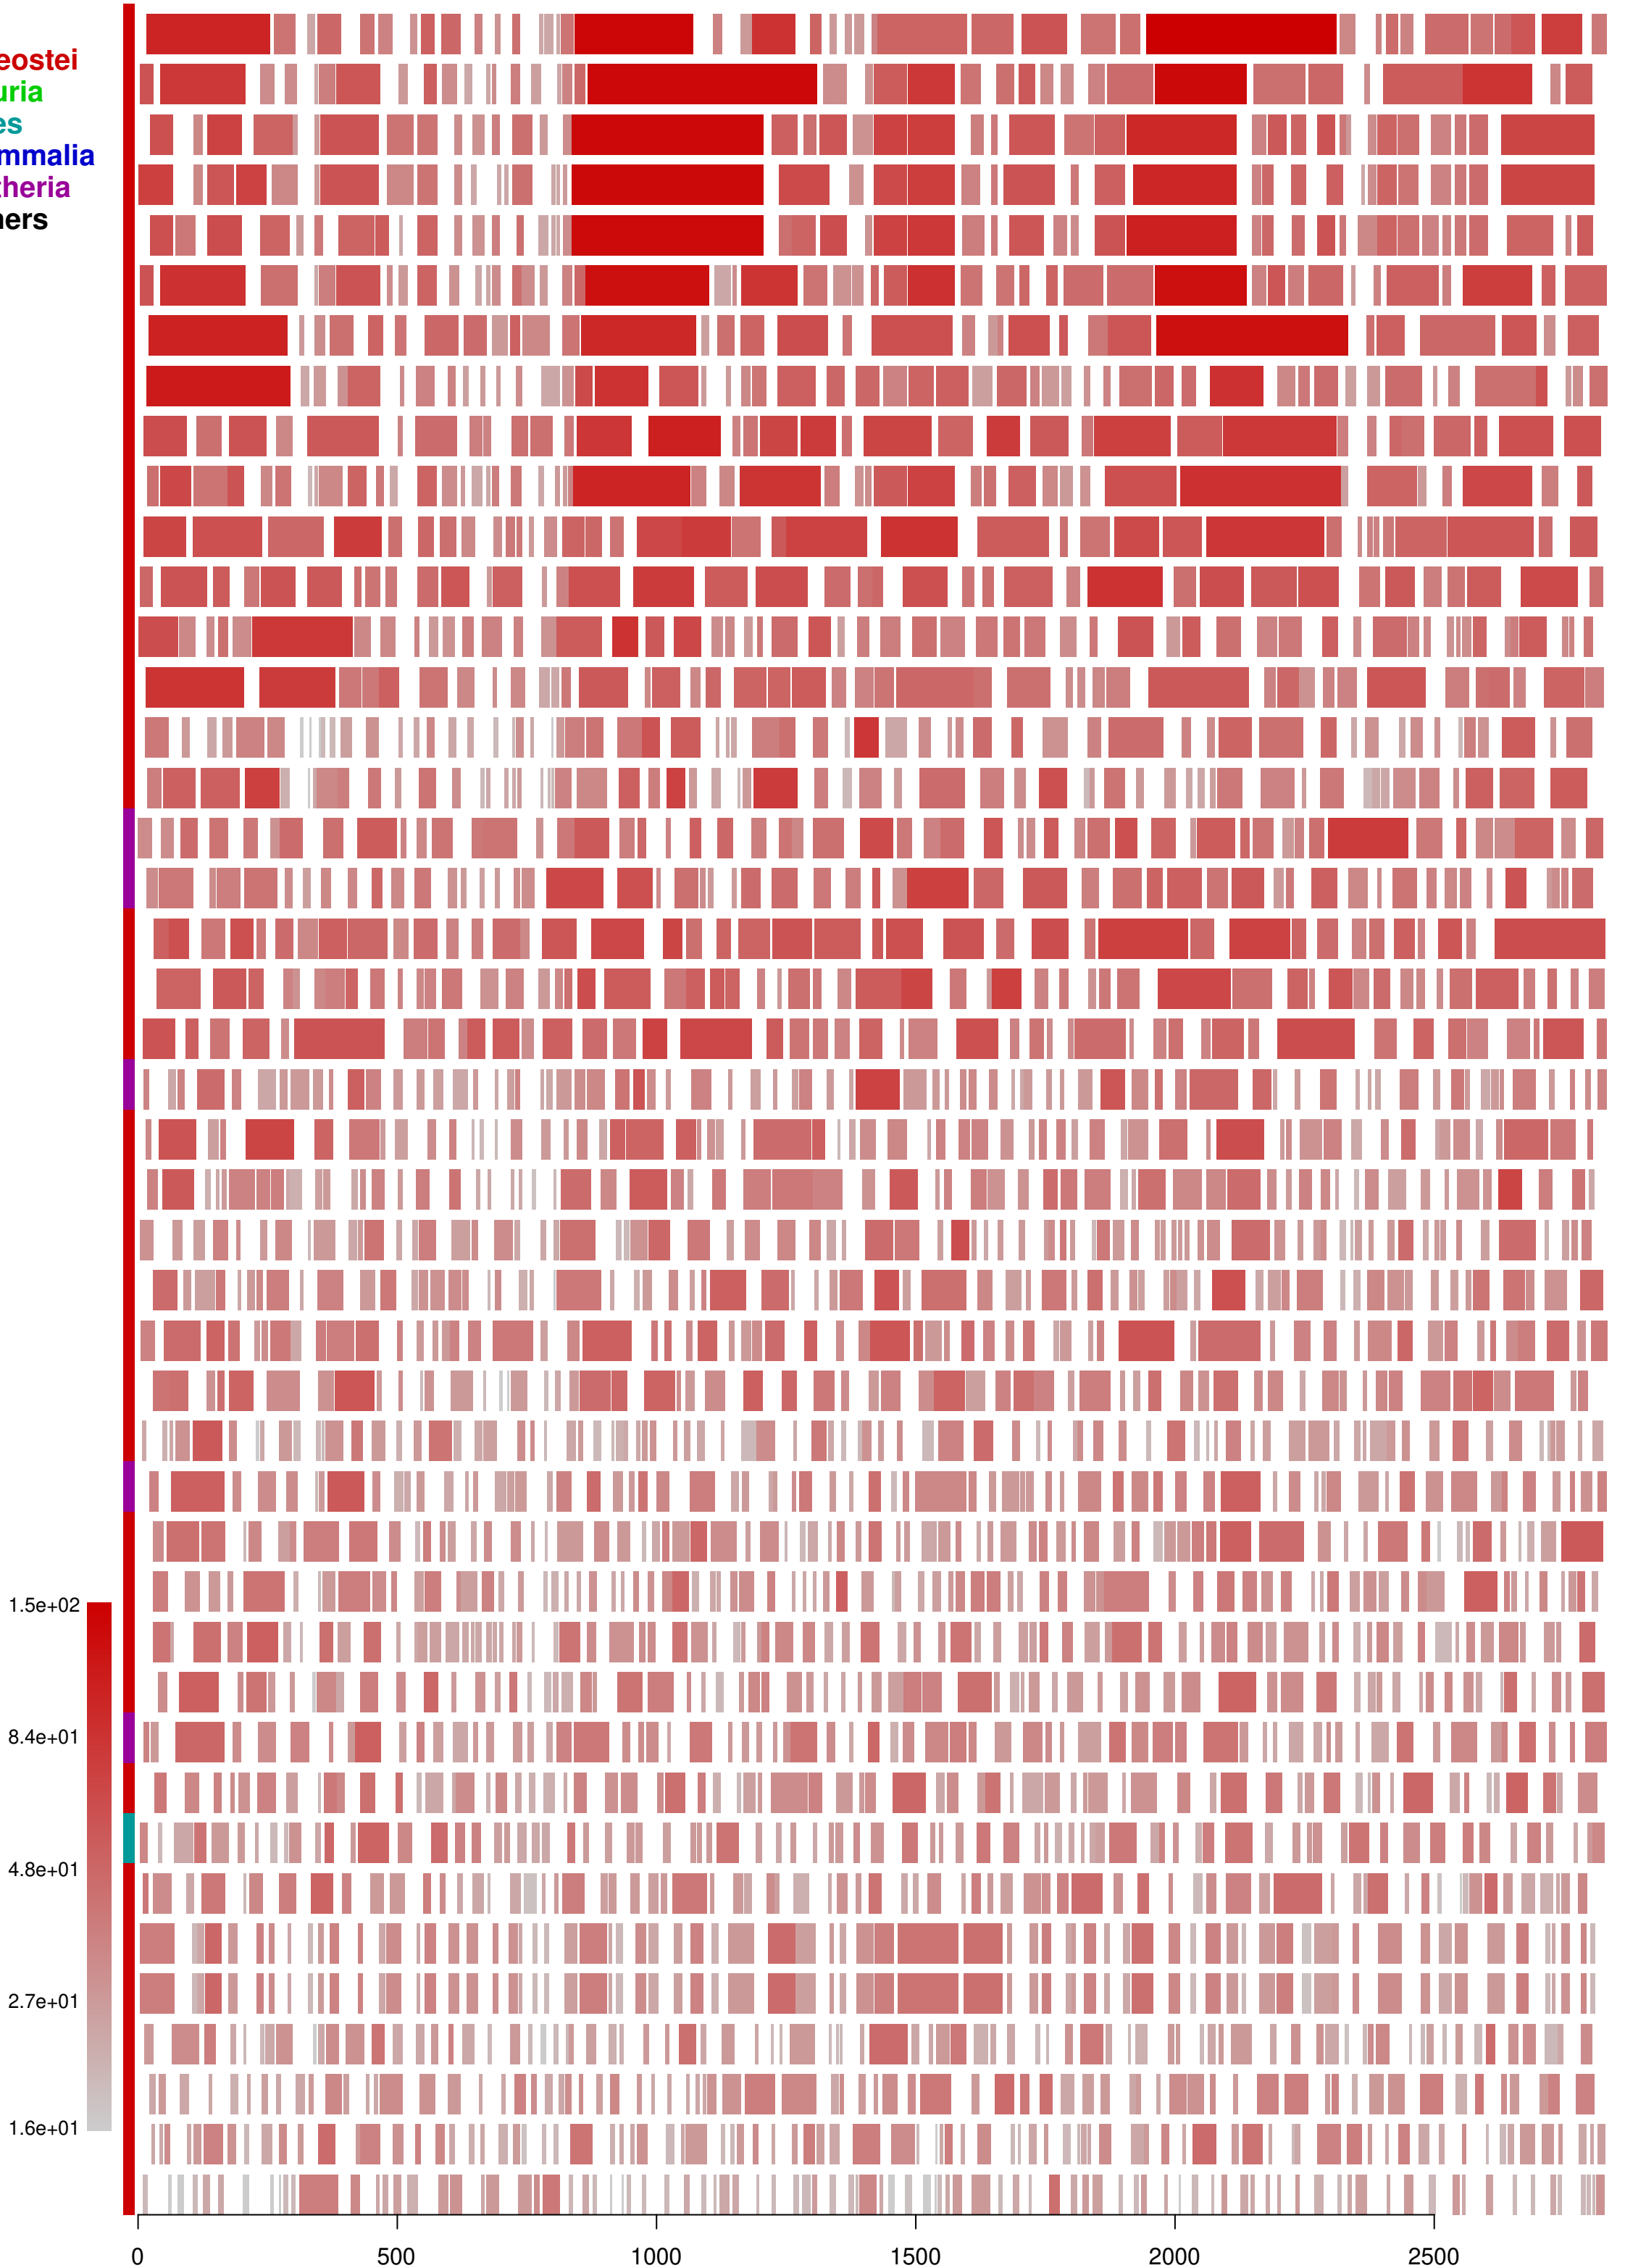

0 alignments above max size (1.0e+08)

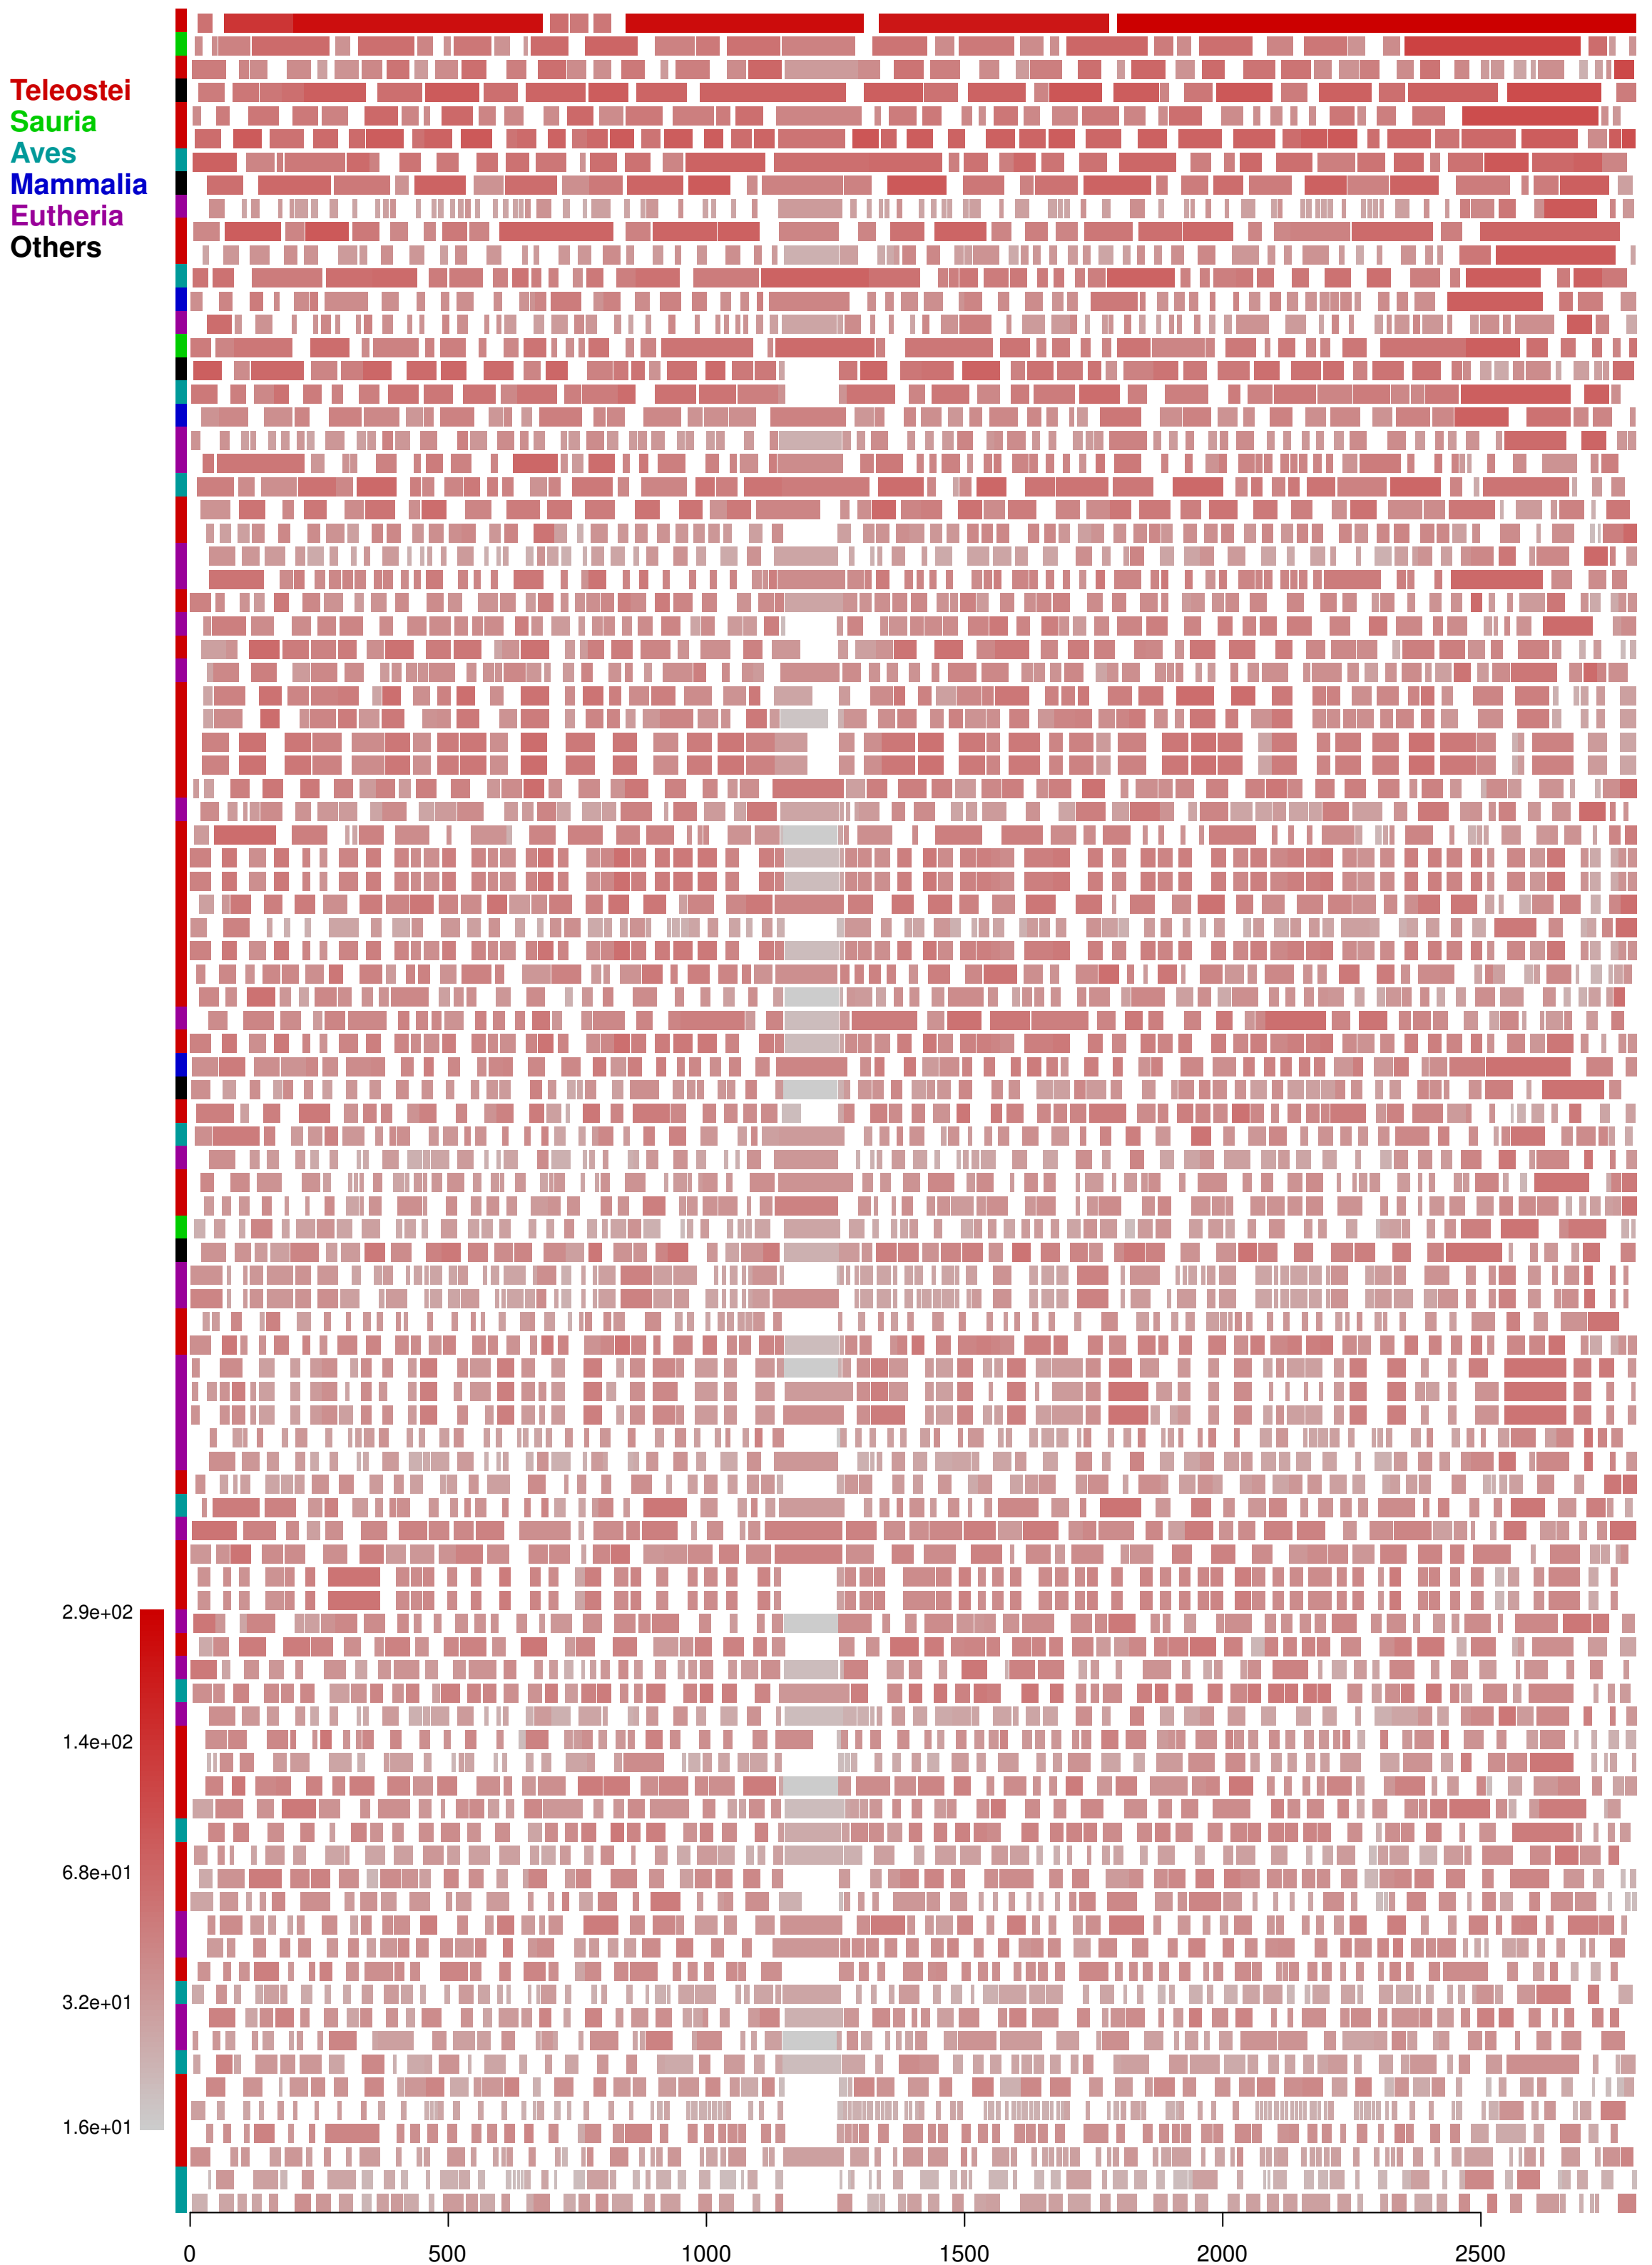

0 alignments above max size (1.0e+08)

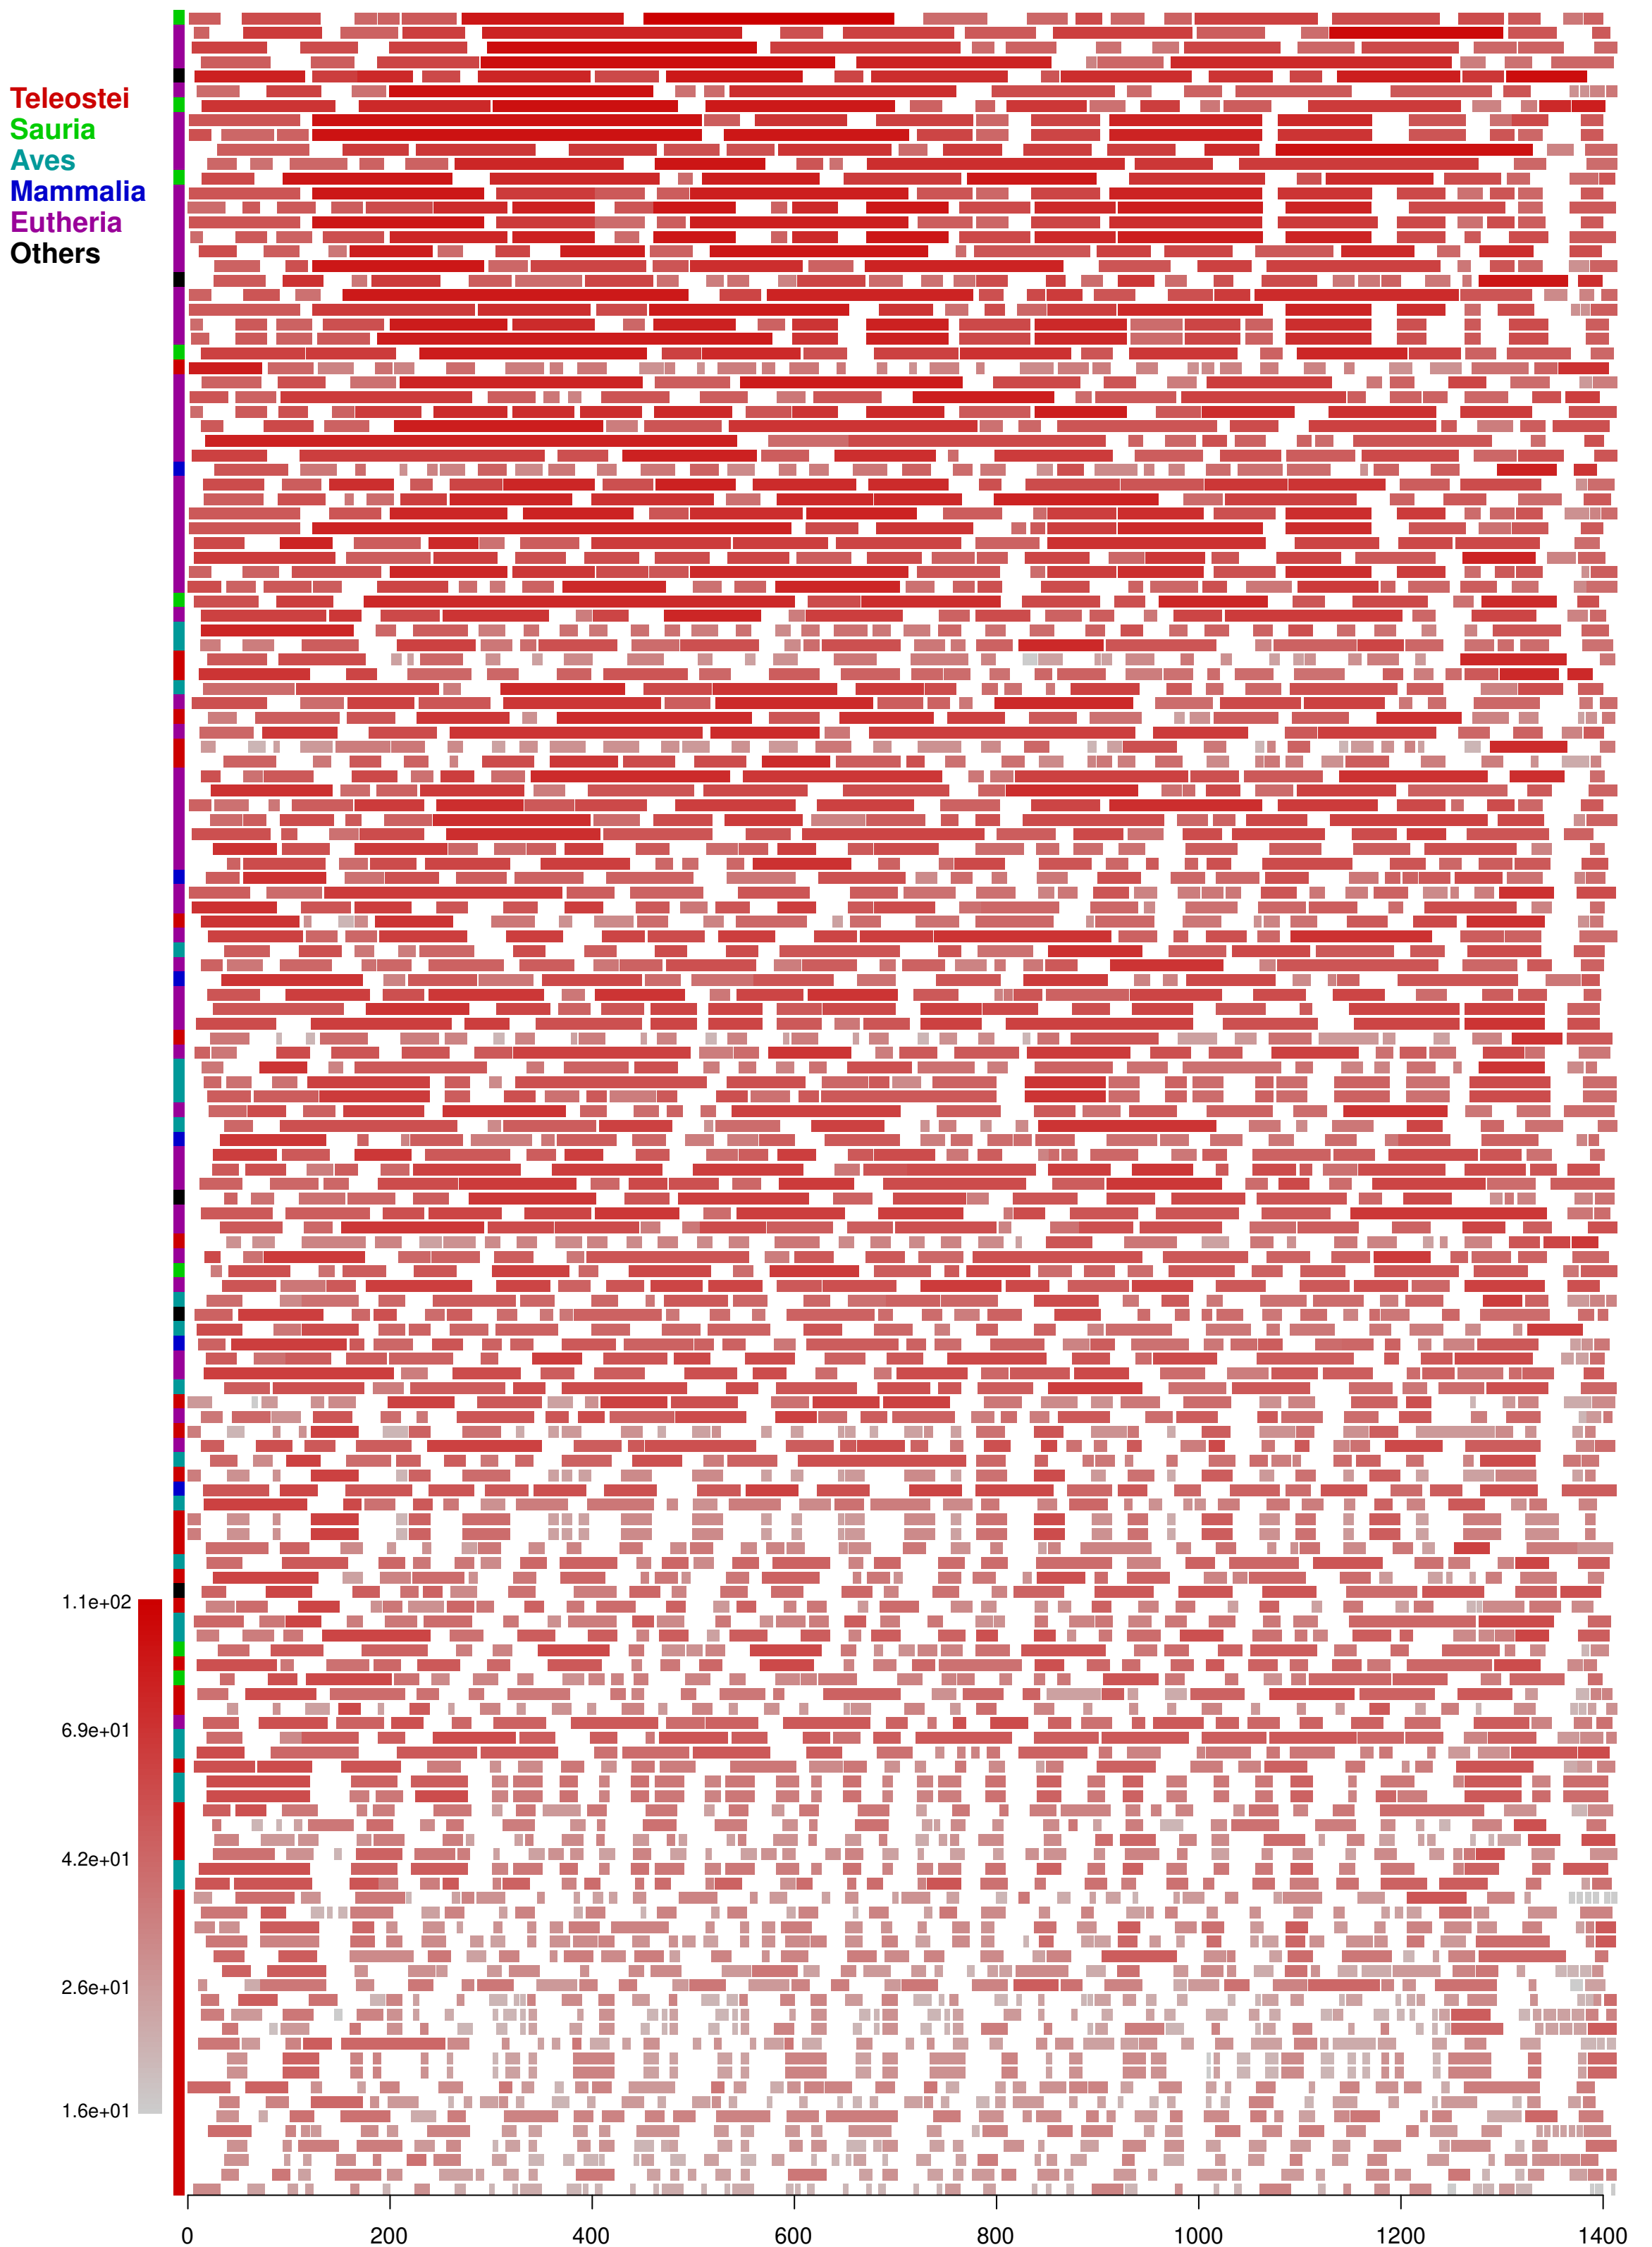

0 alignments above max size (1.0e+08)

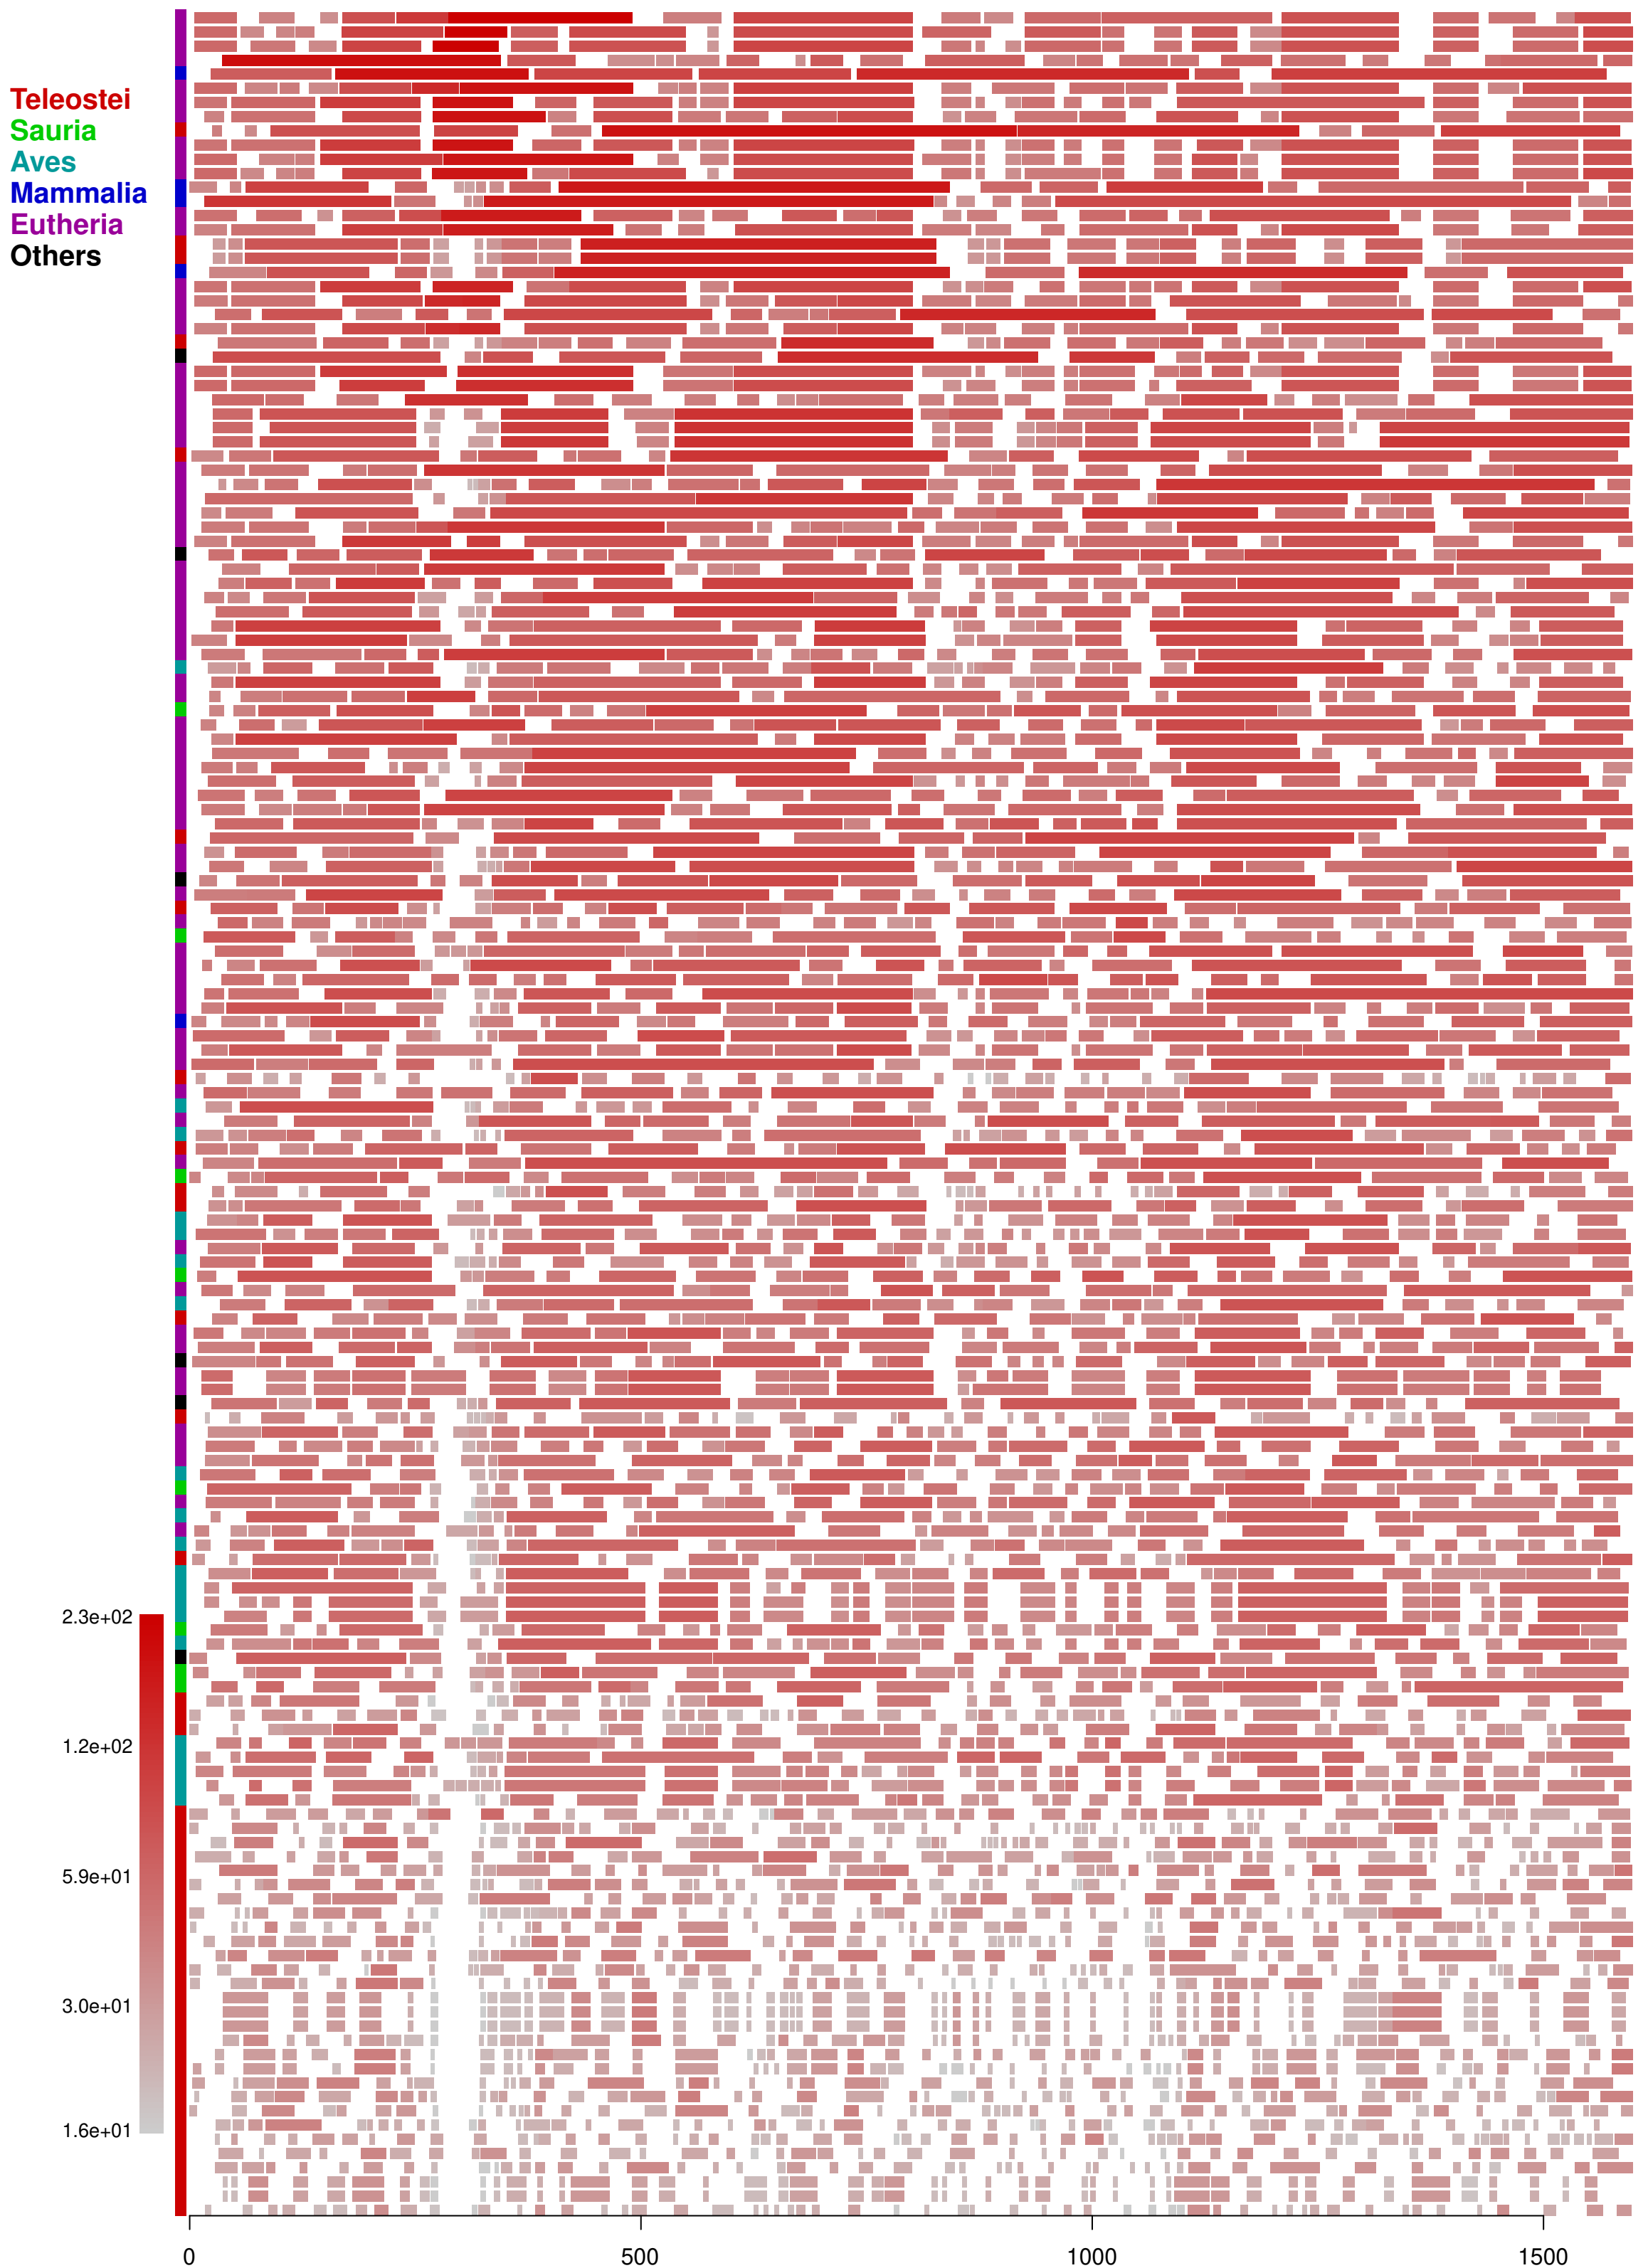

0 alignments above max size (1.0e+08)



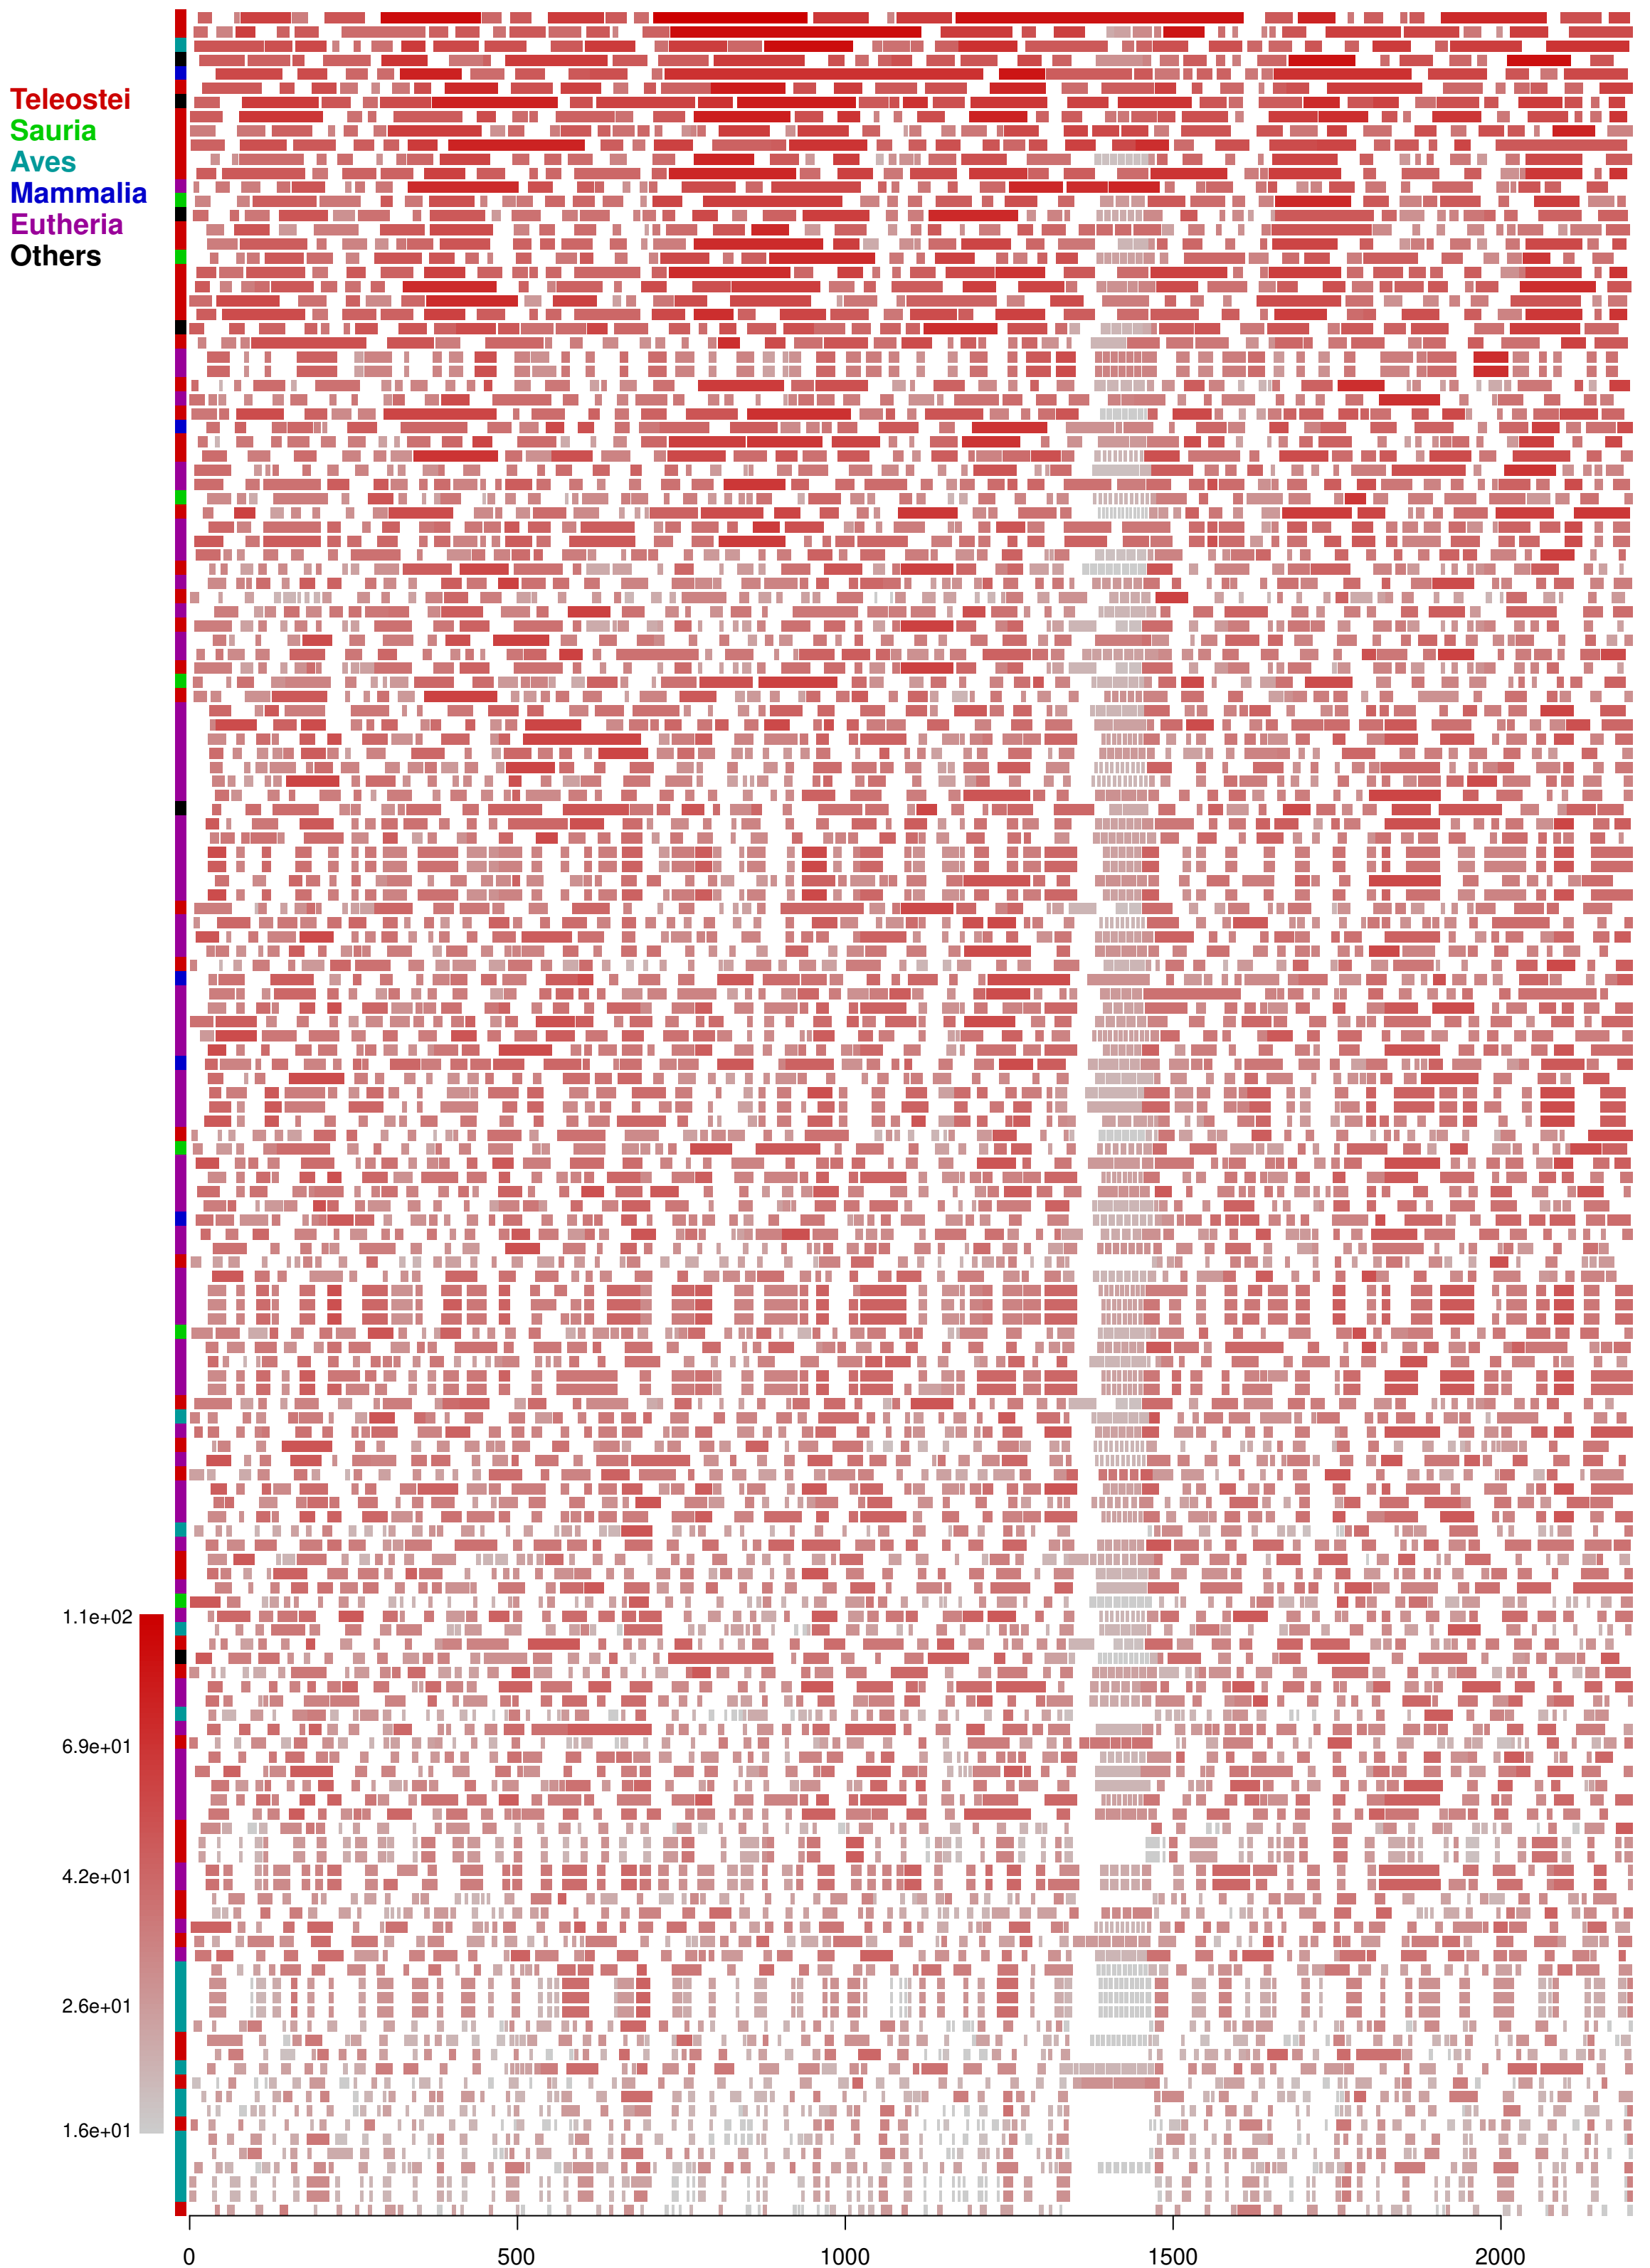

0 alignments above max size (1.0e+08)

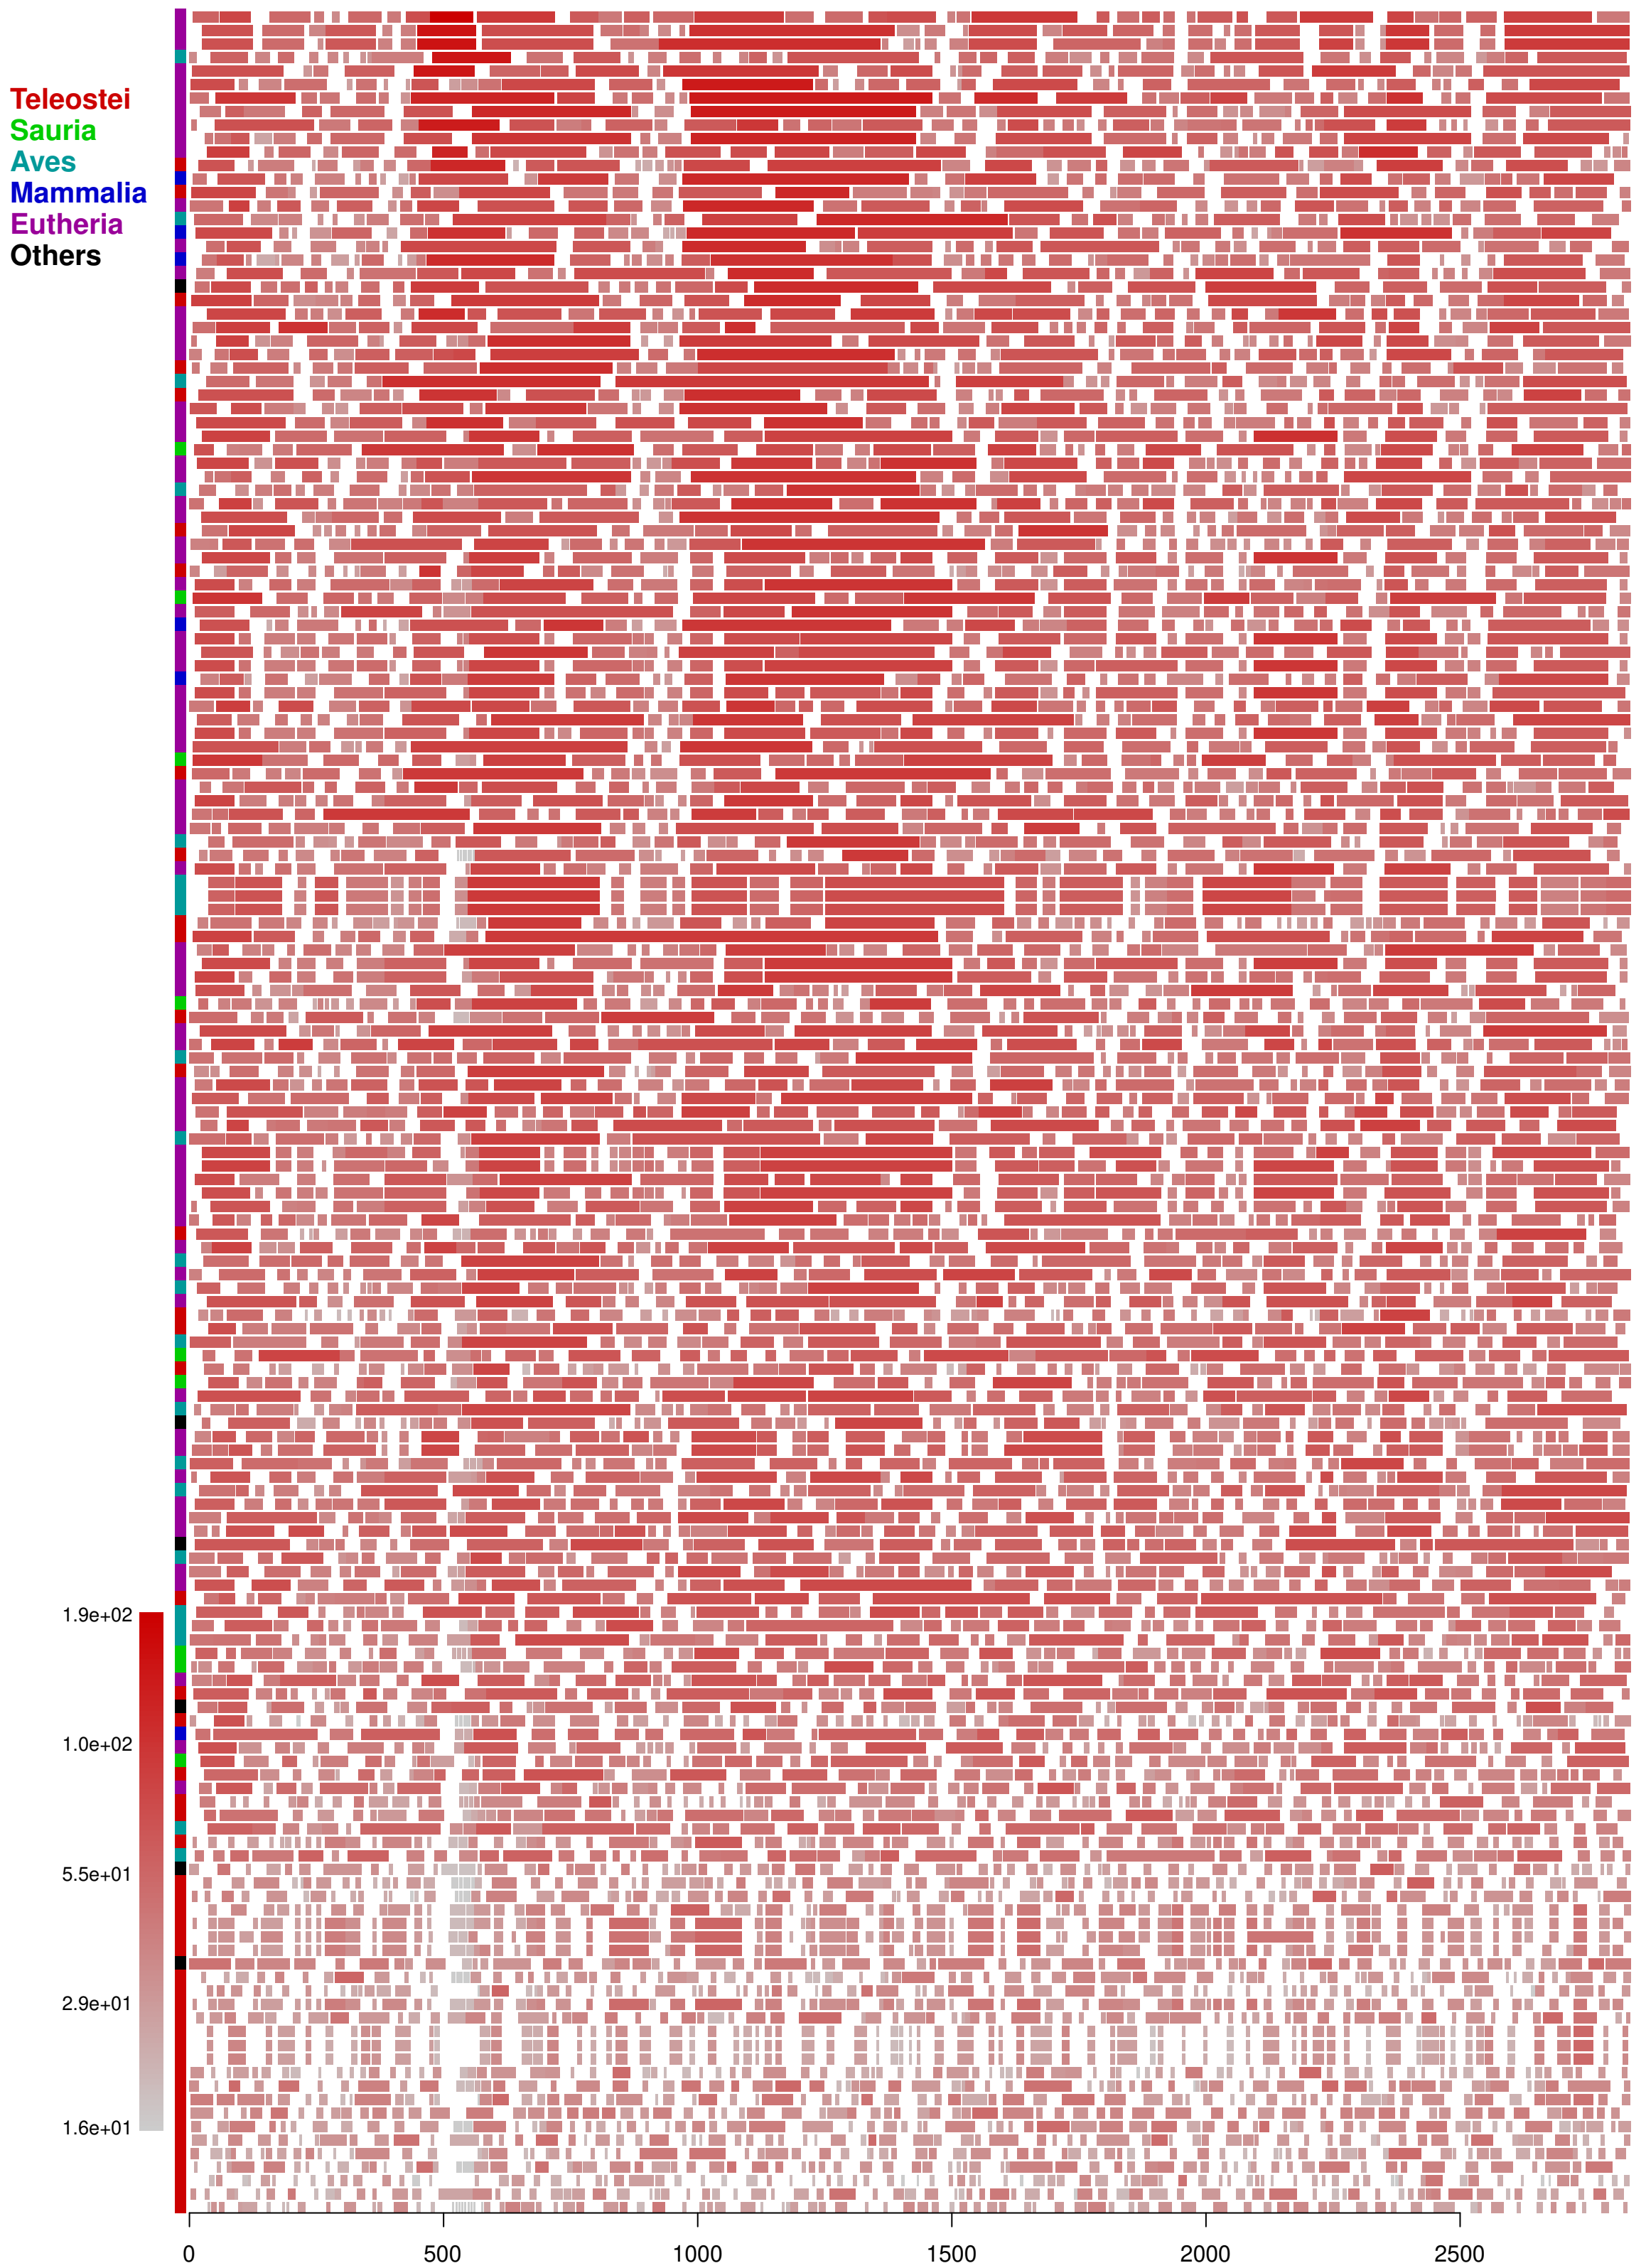

0 alignments above max size (1.0e+08)

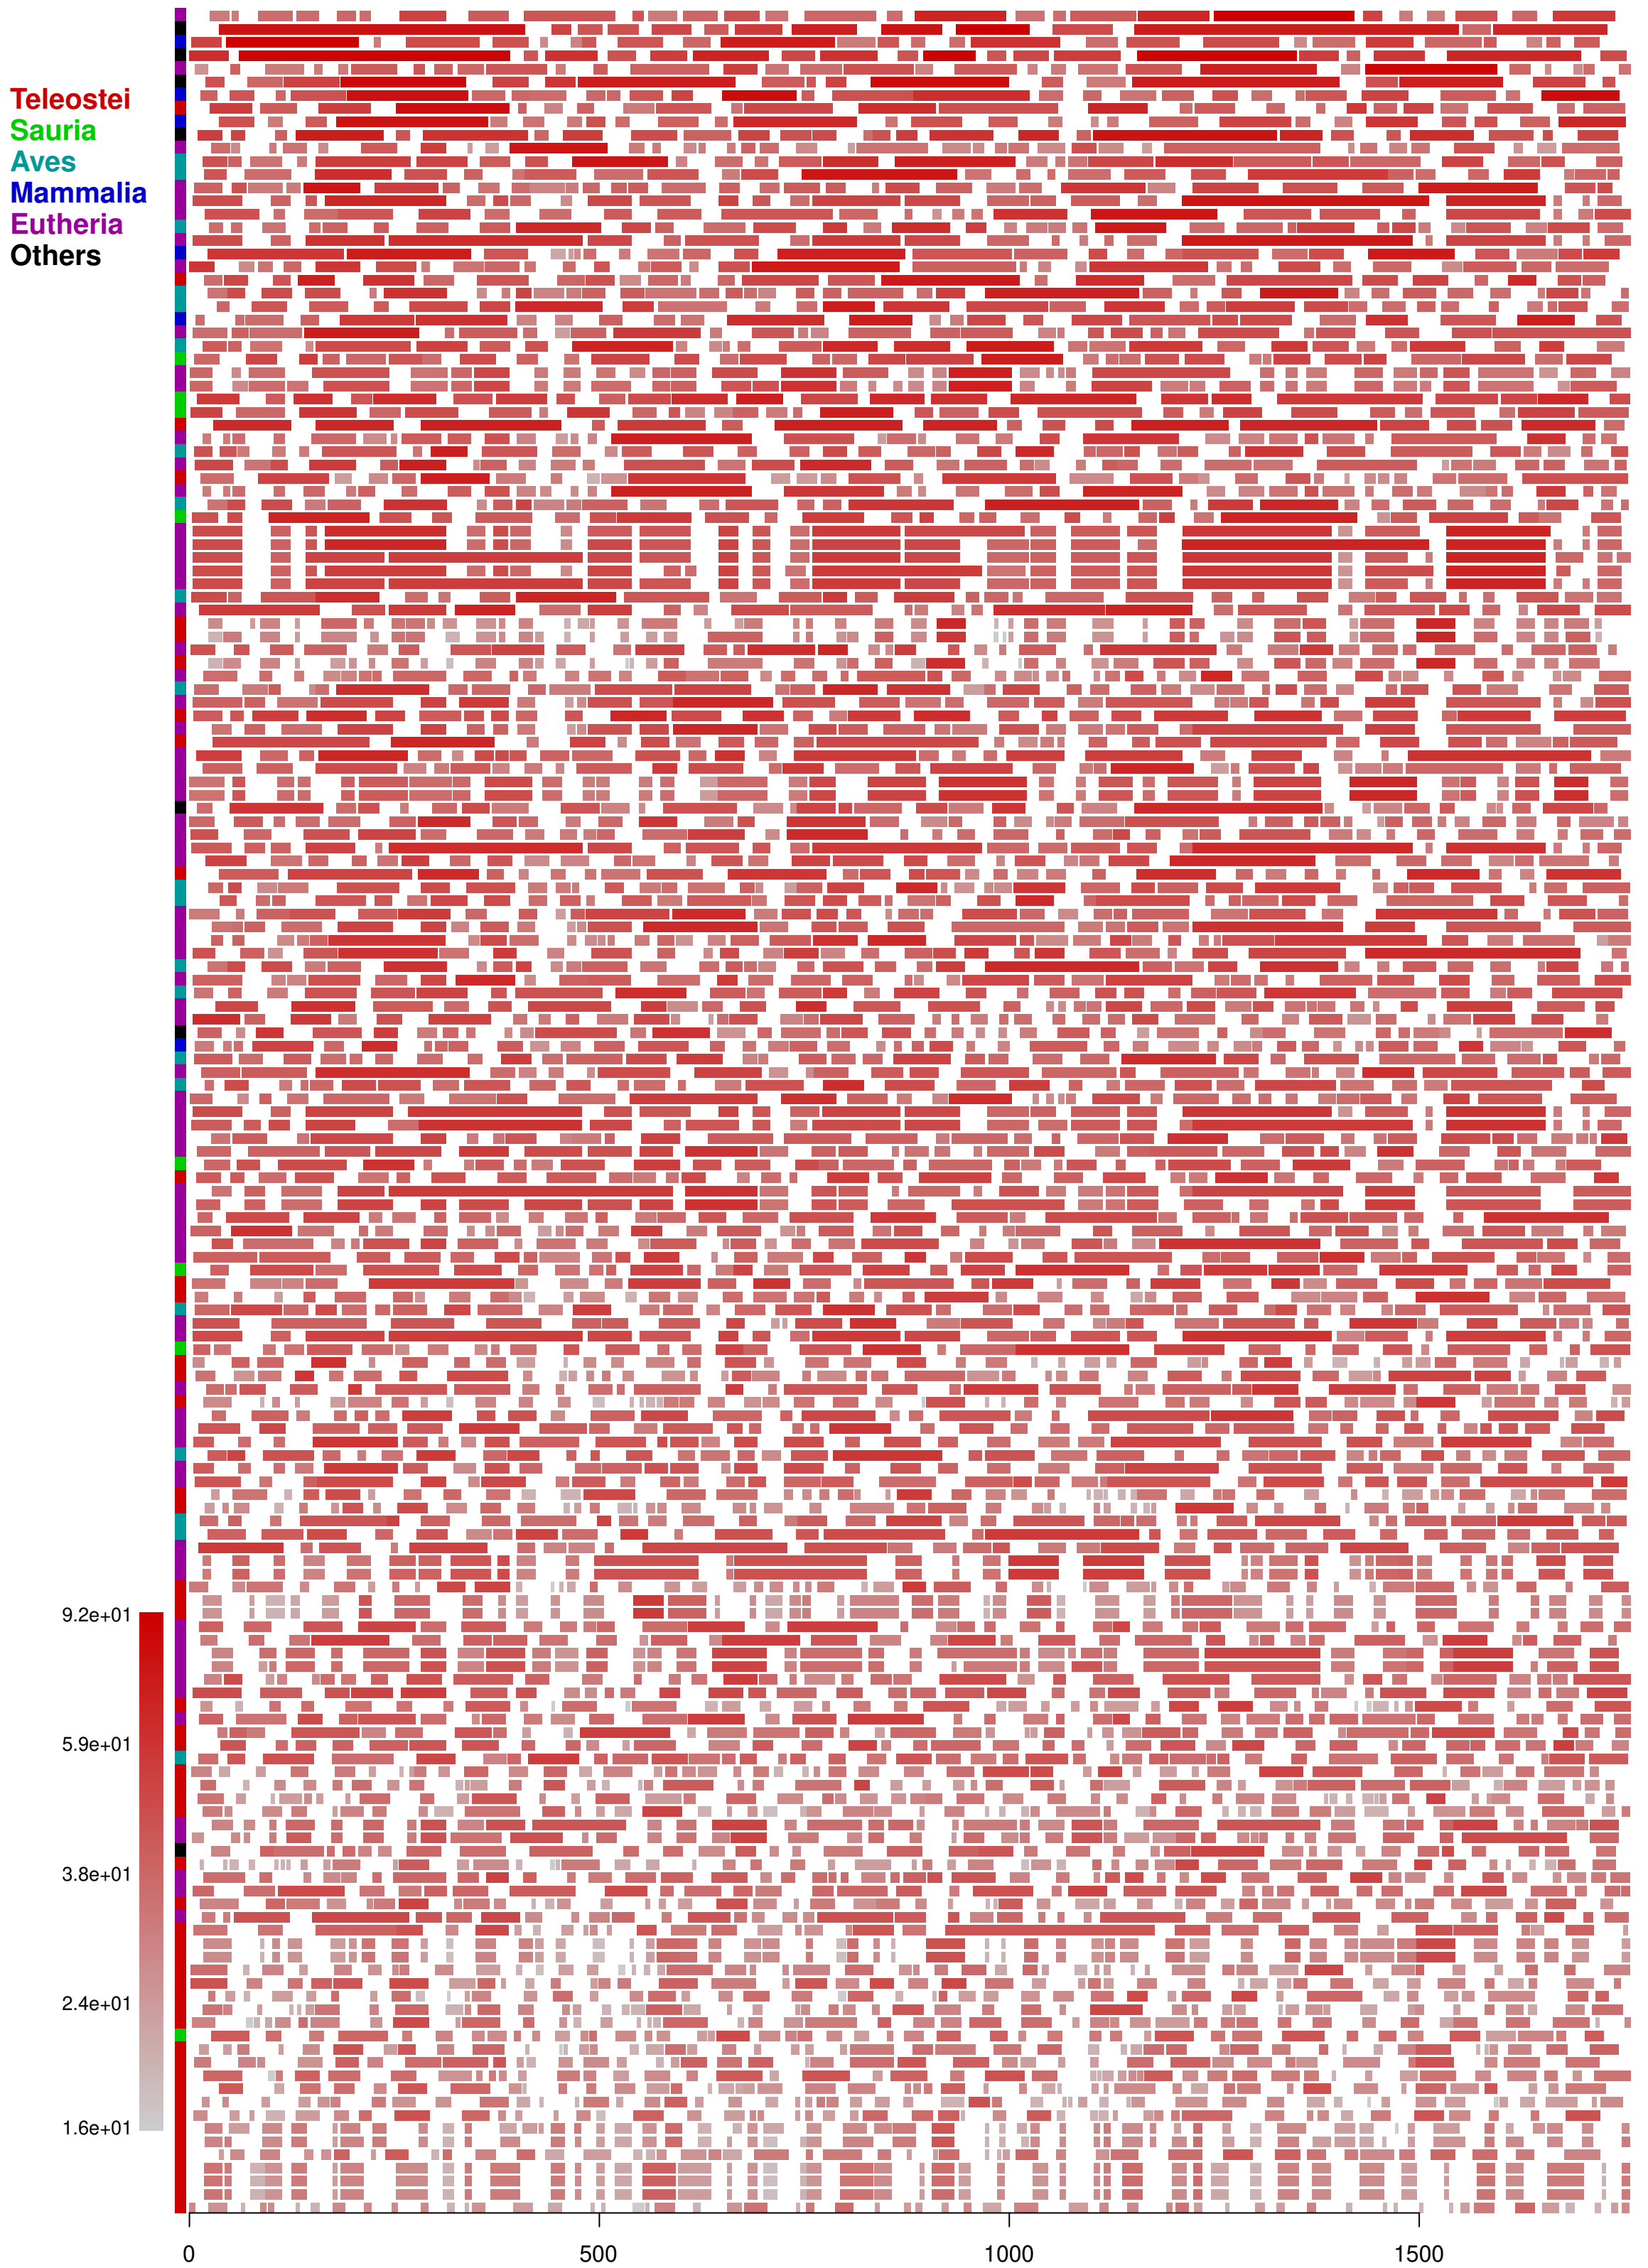

0 alignments above max size (1.0e+08)

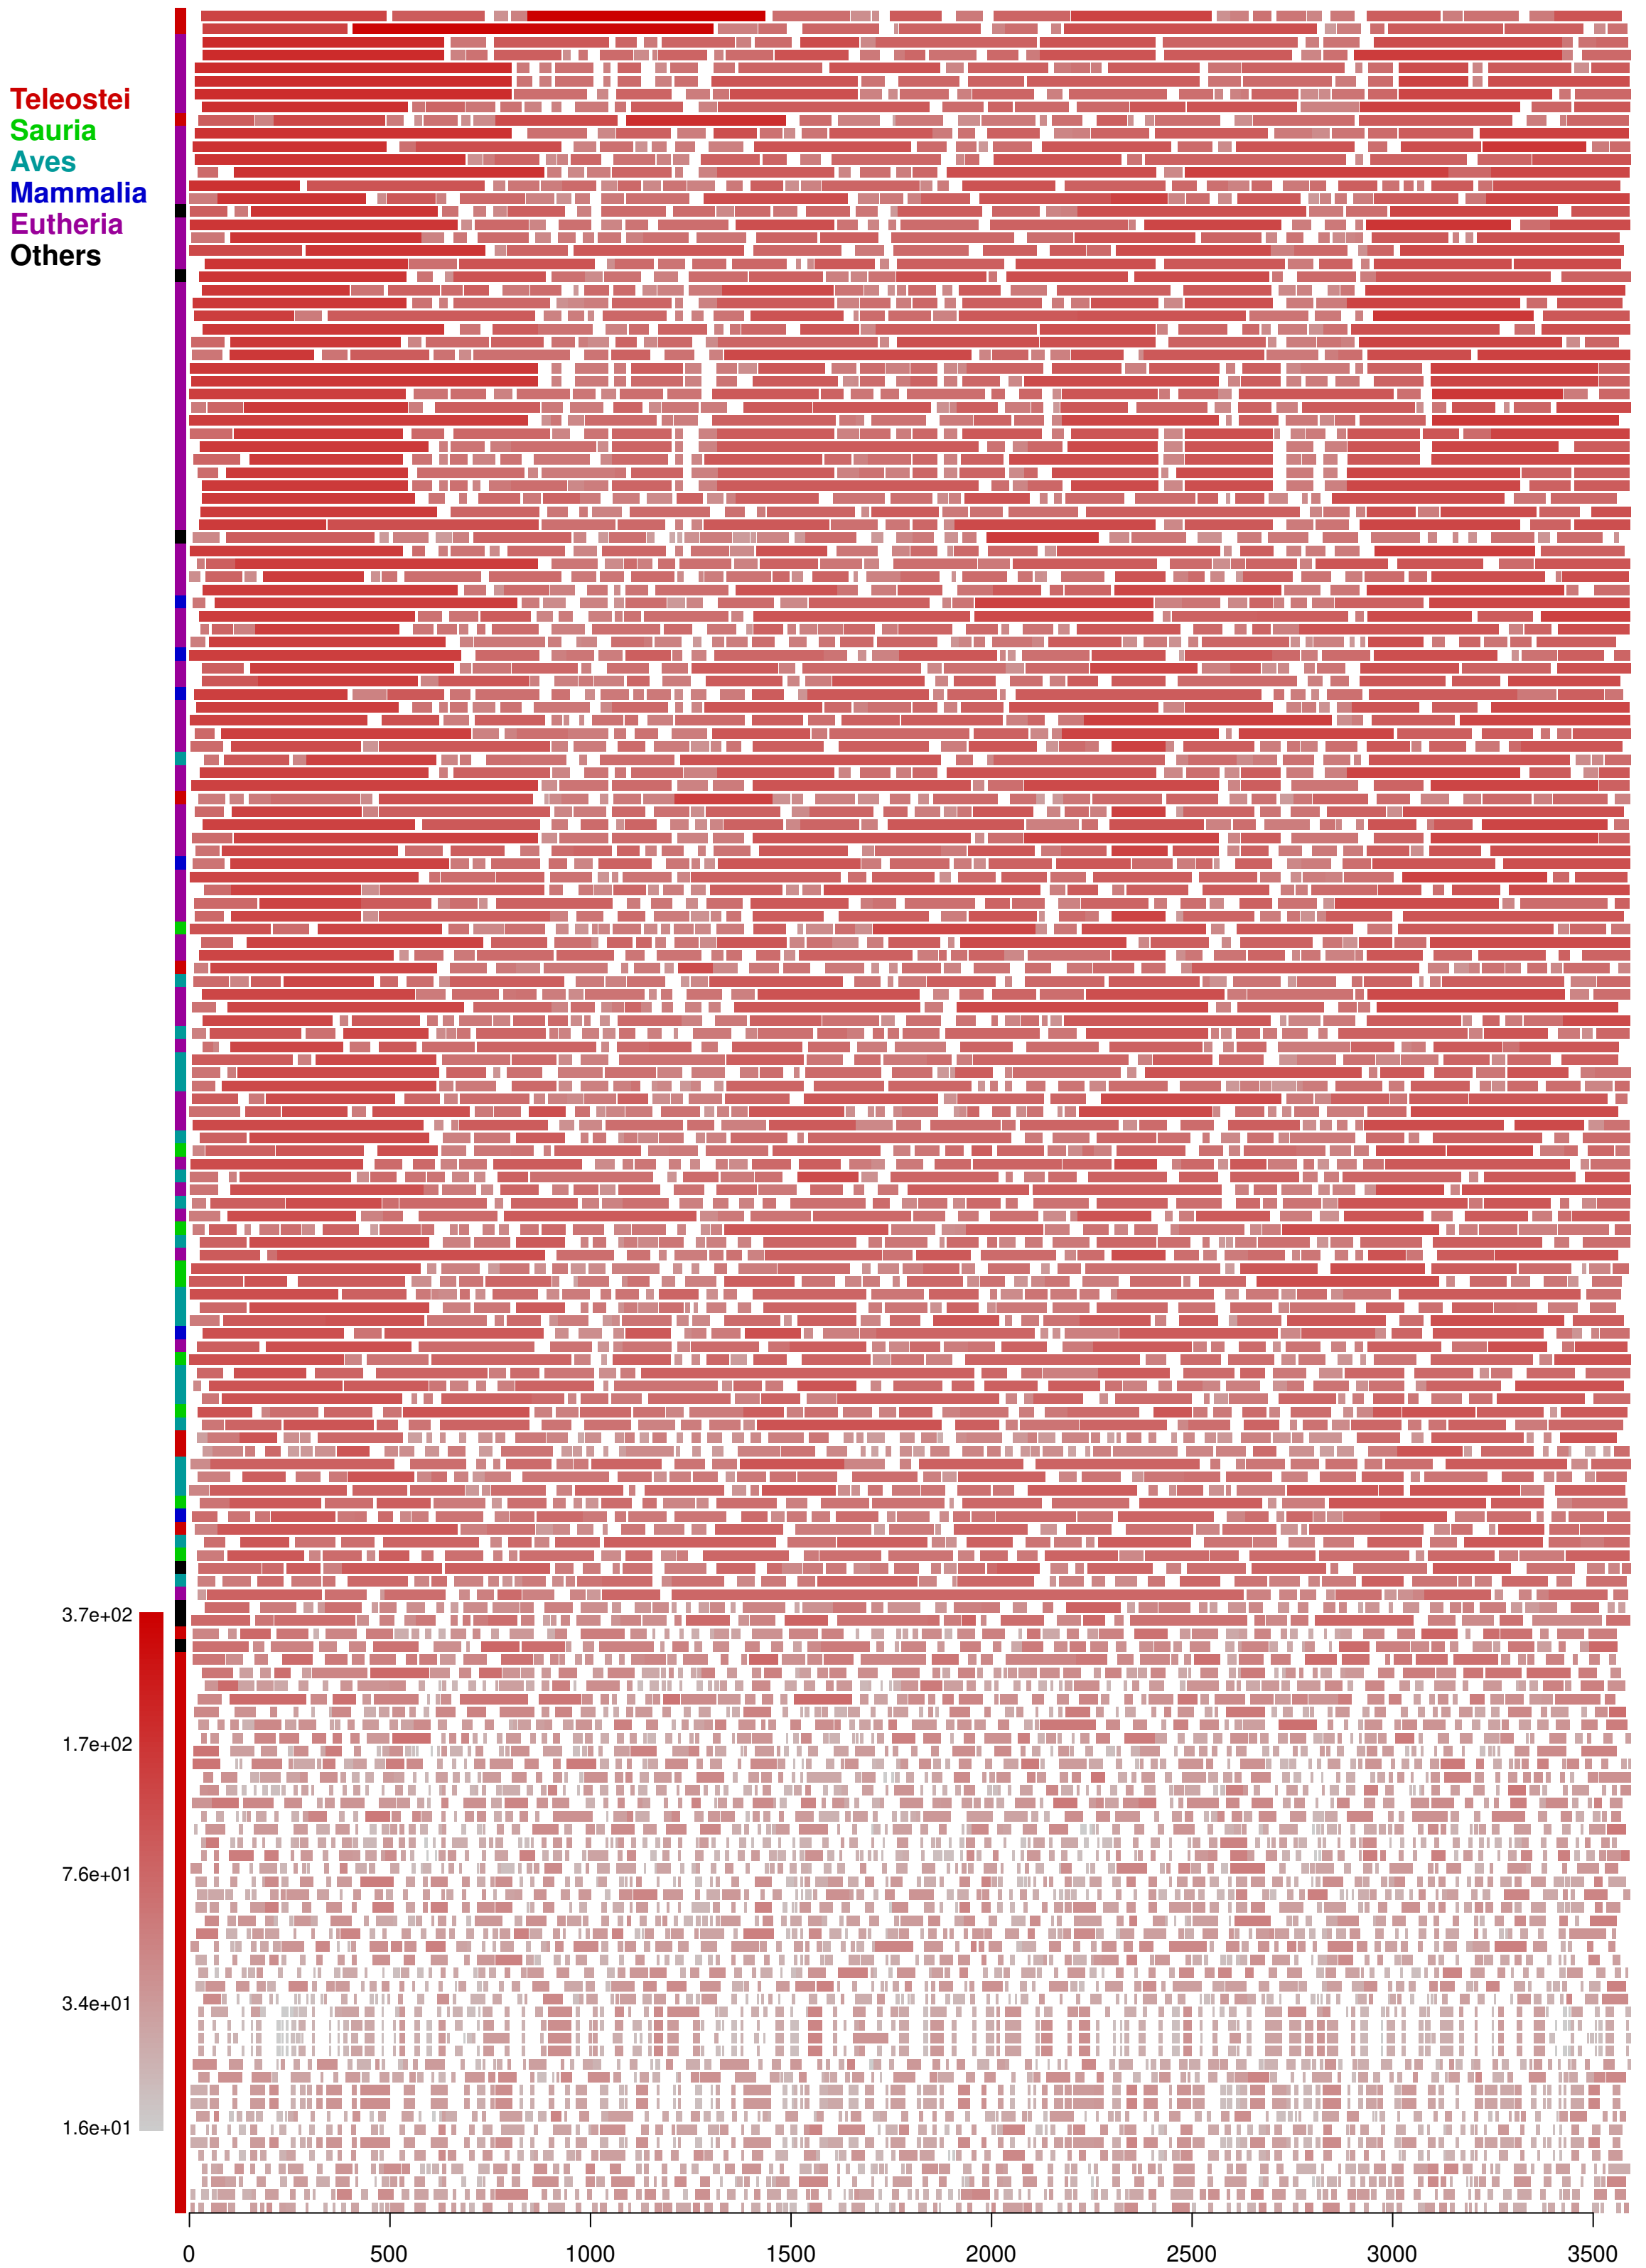

0 alignments above max size (1.0e+08)

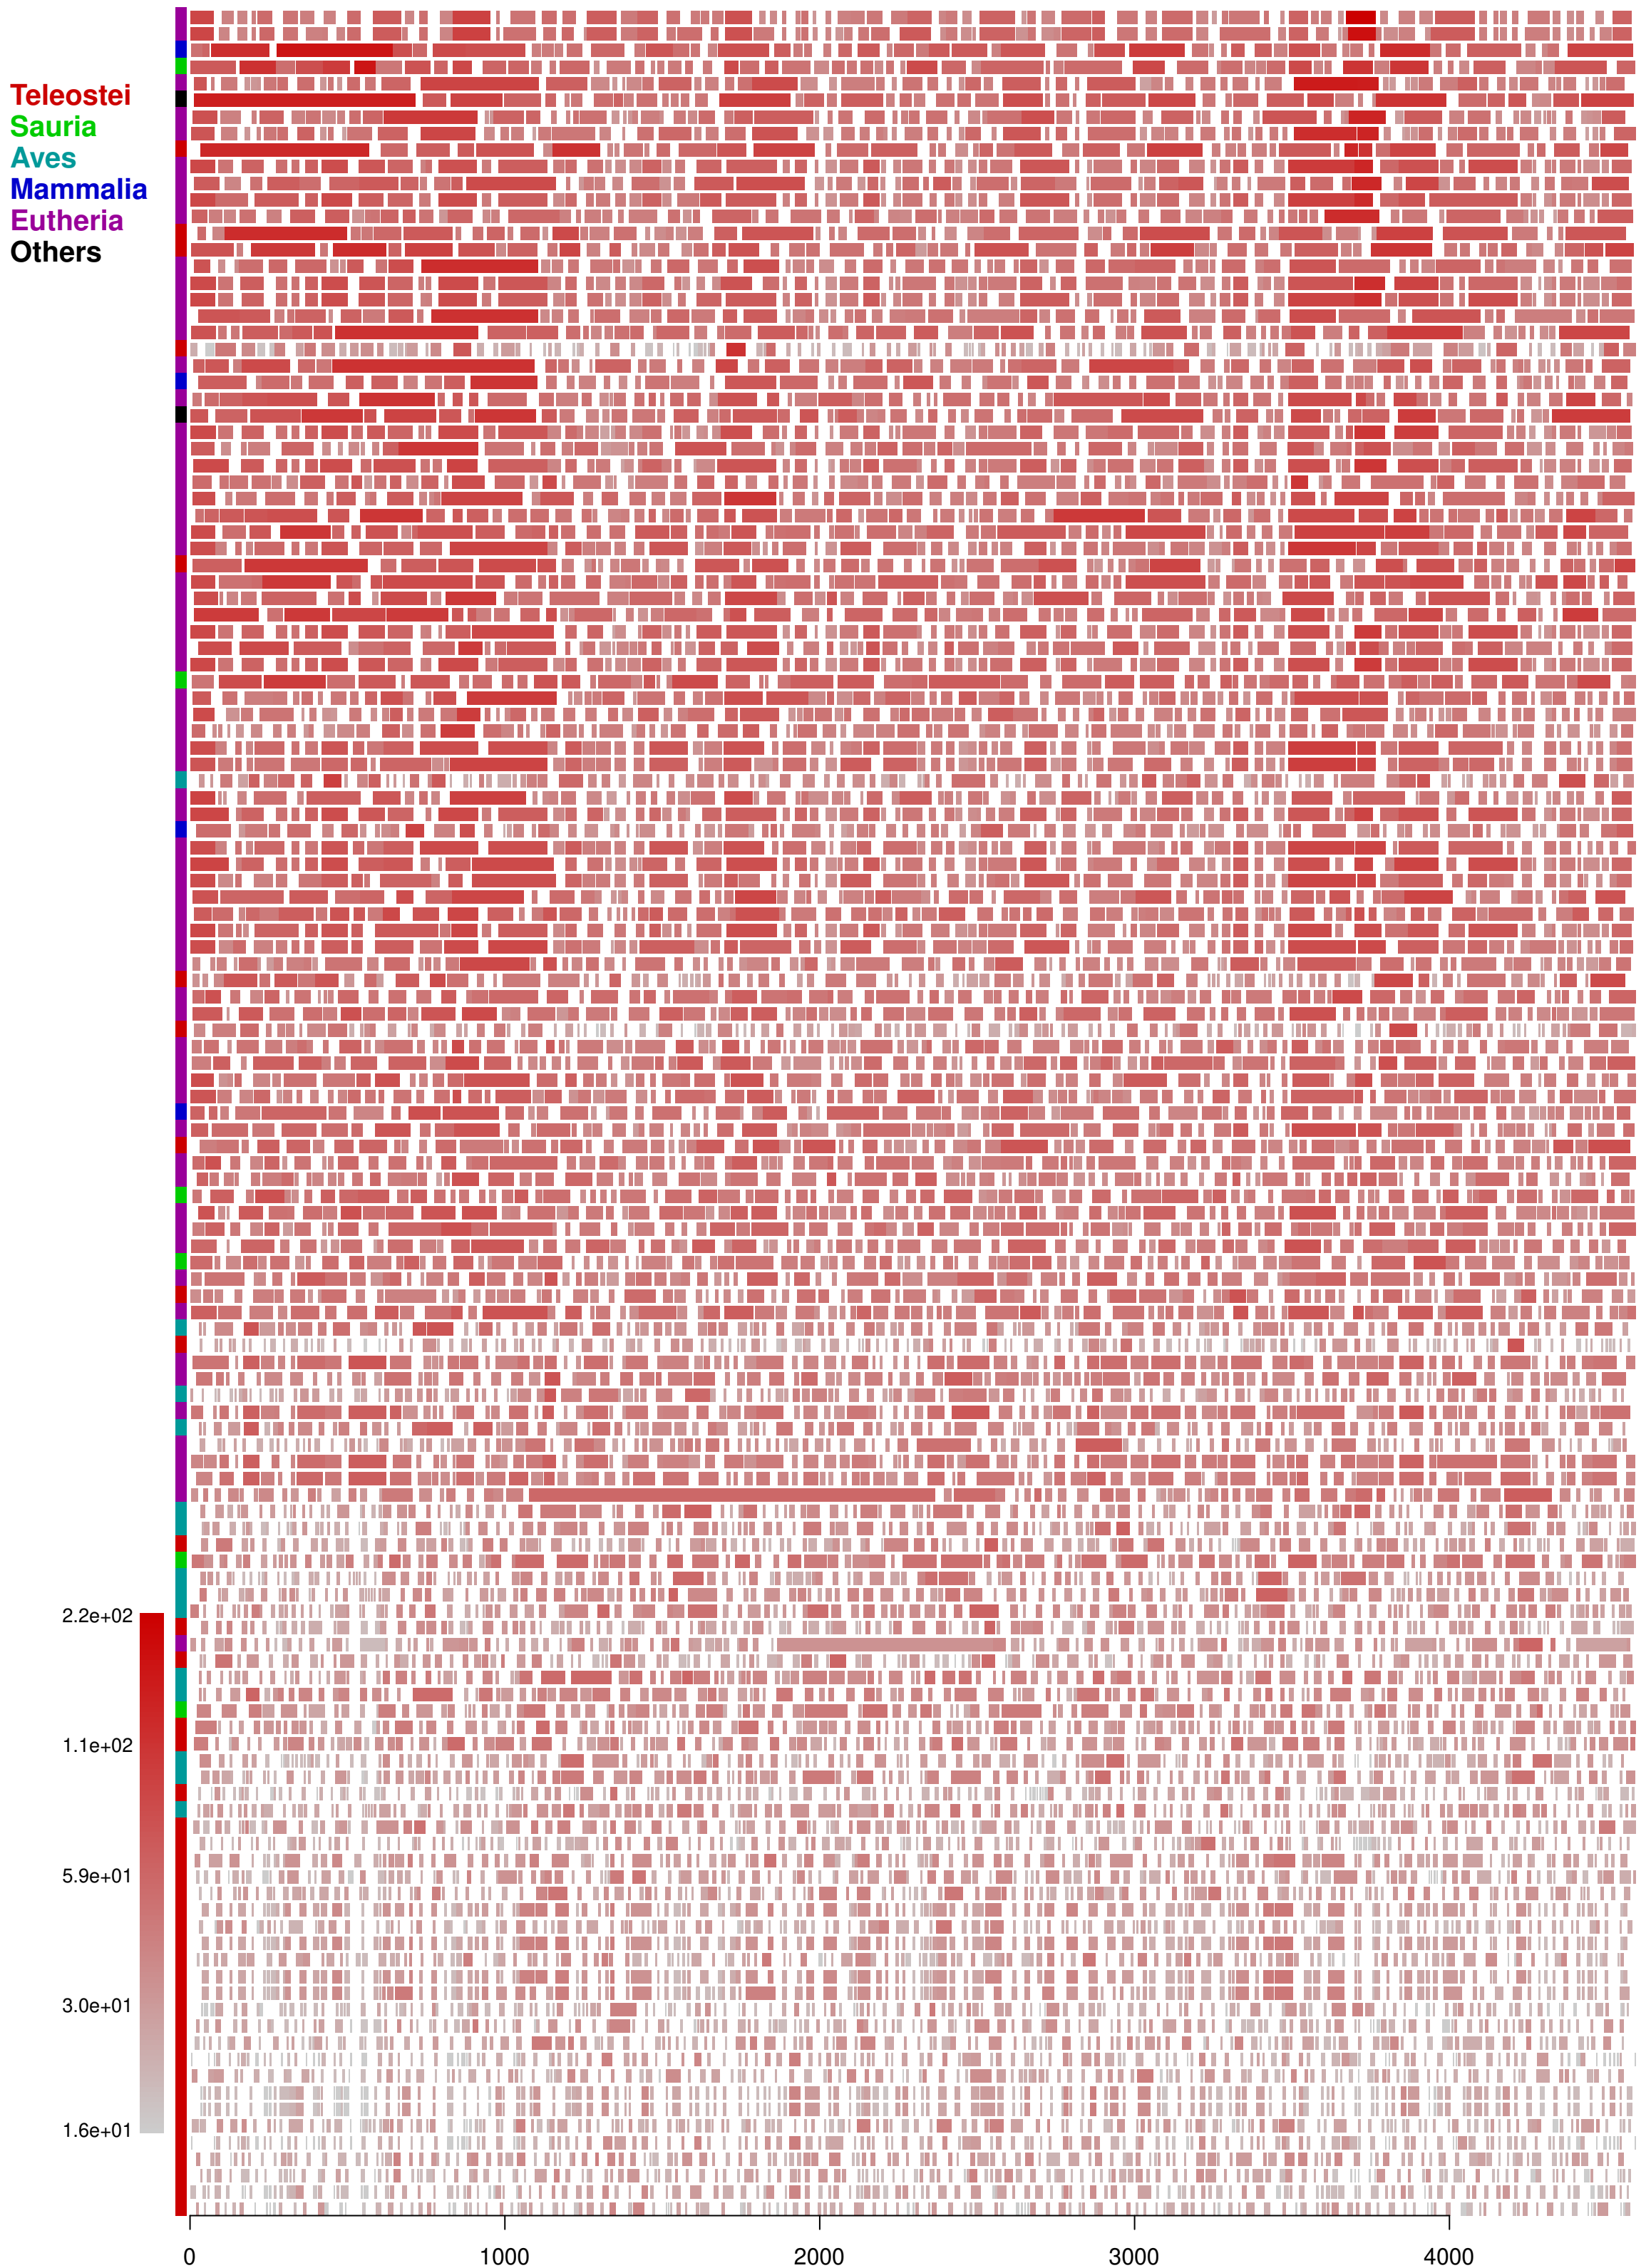

0 alignments above max size (1.0e+08)

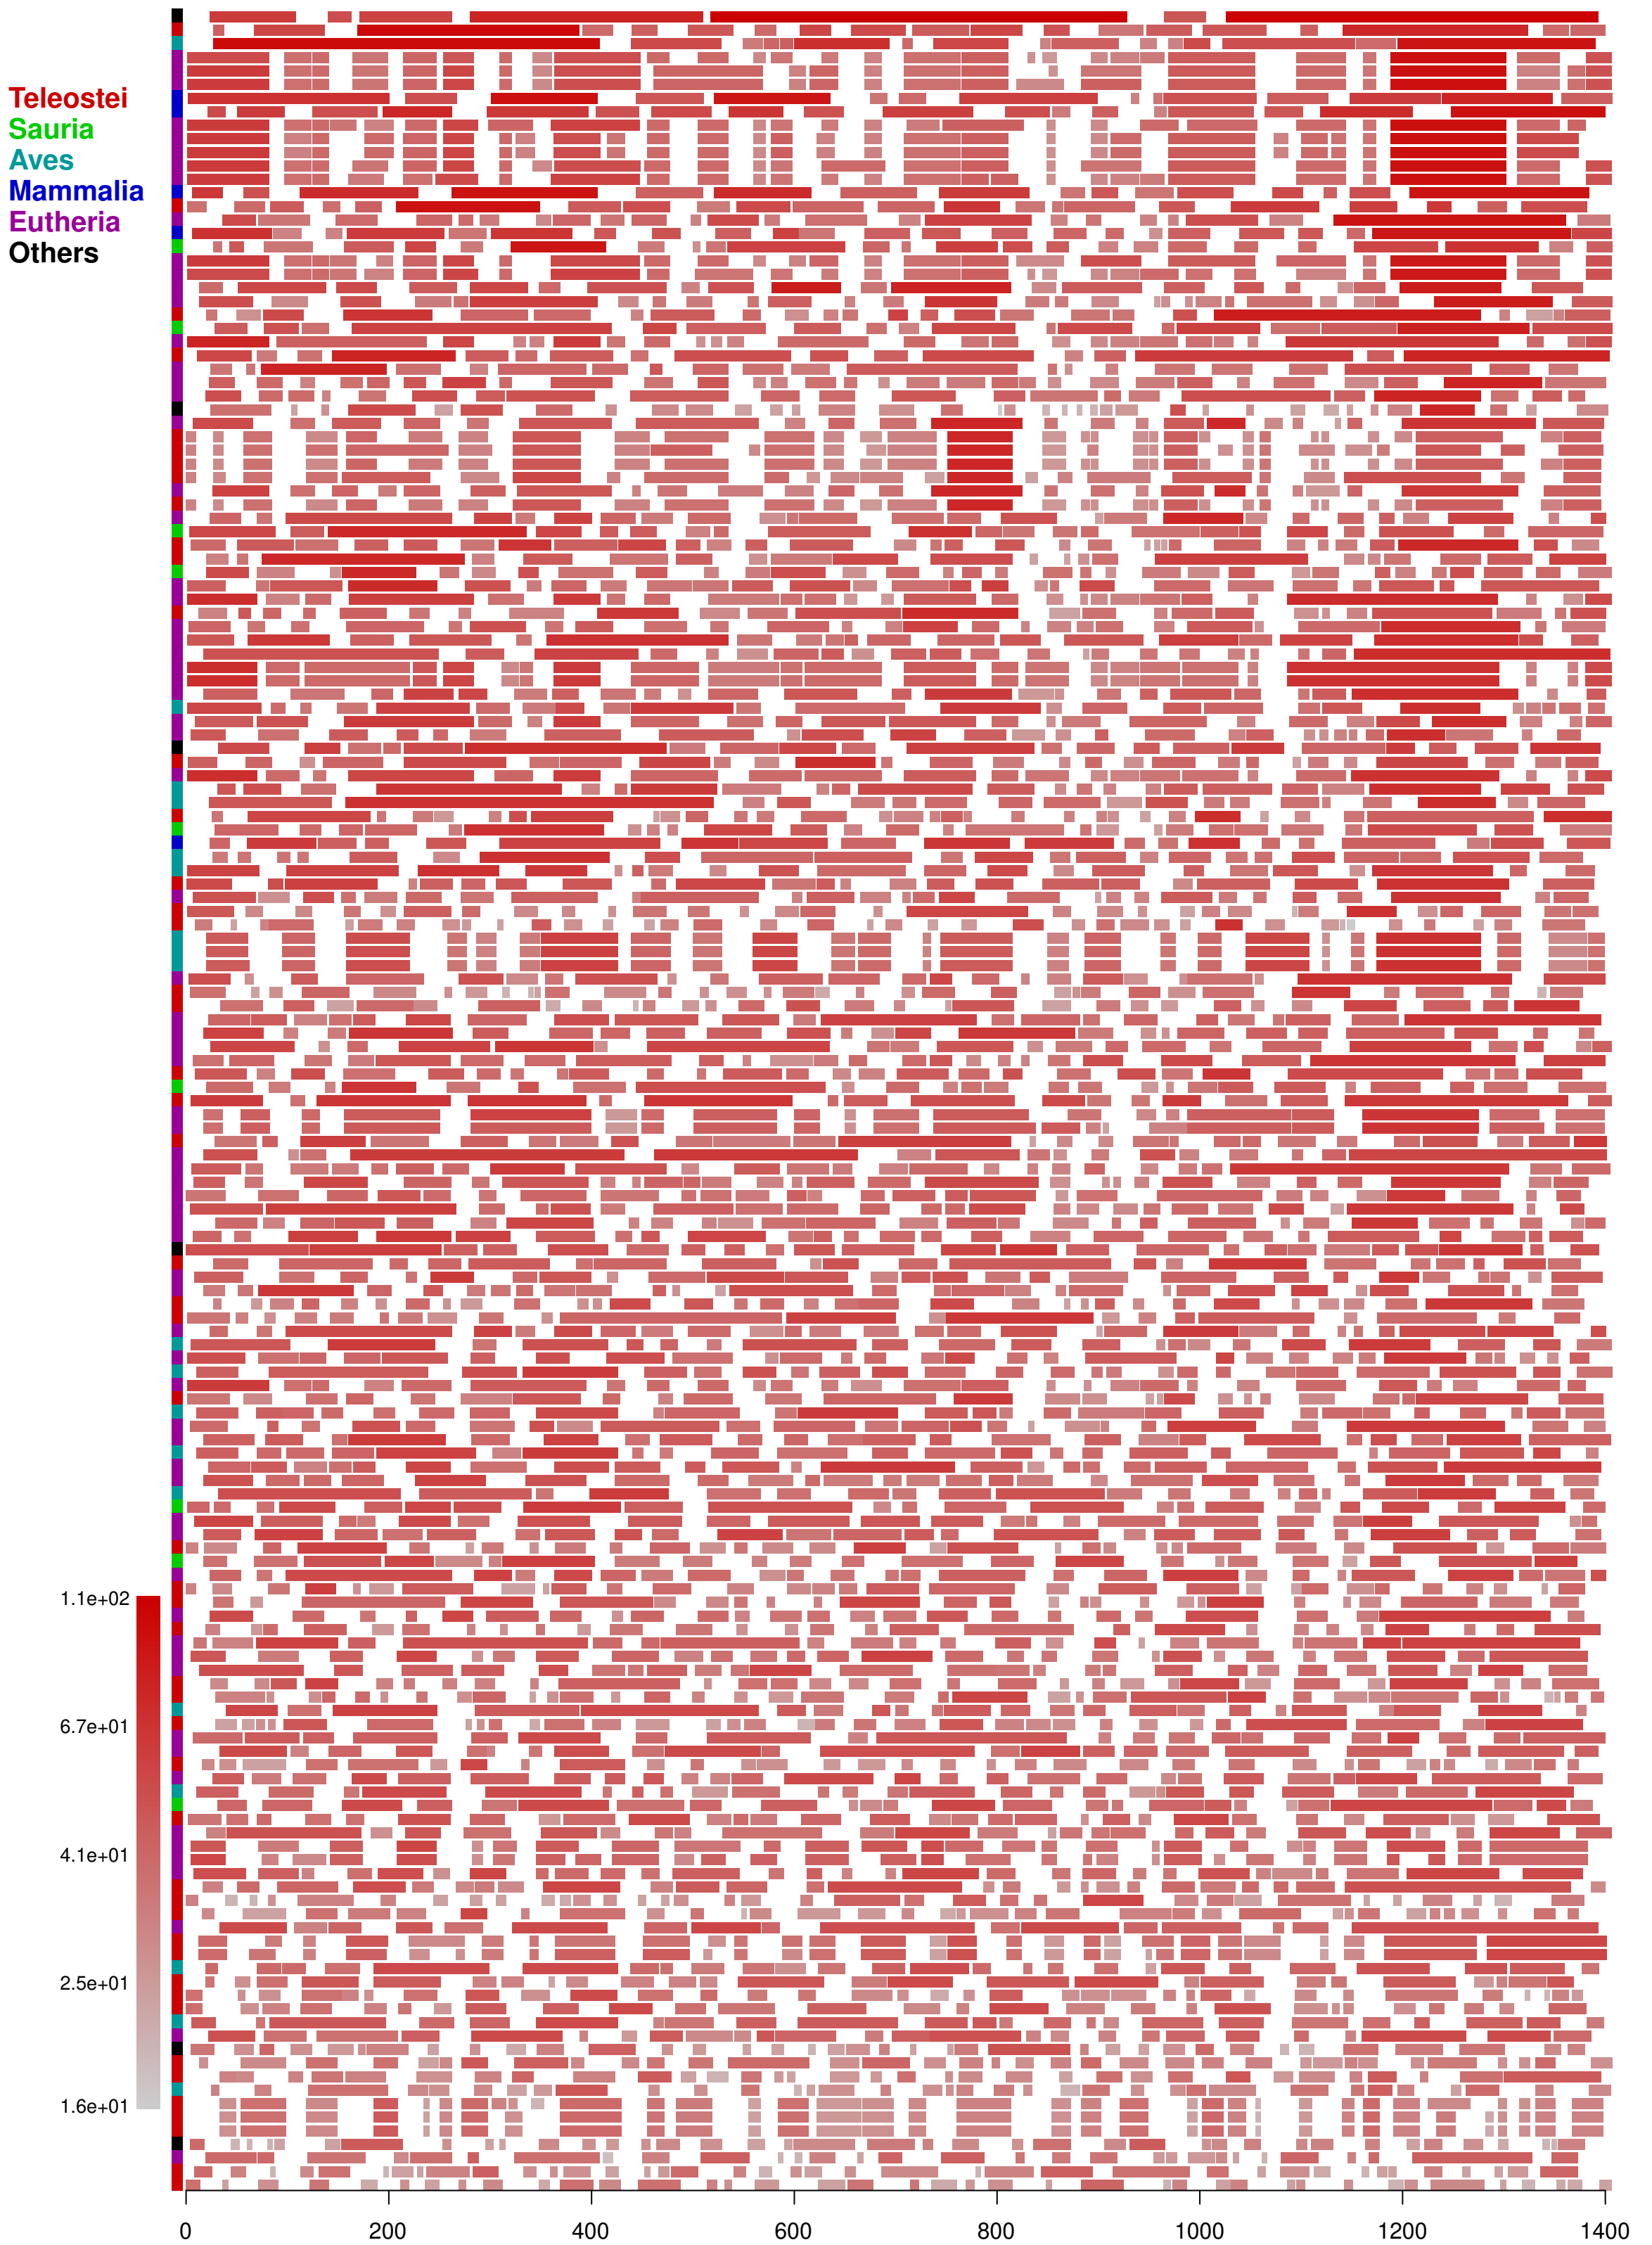

0 alignments above max size (1.0e+08)

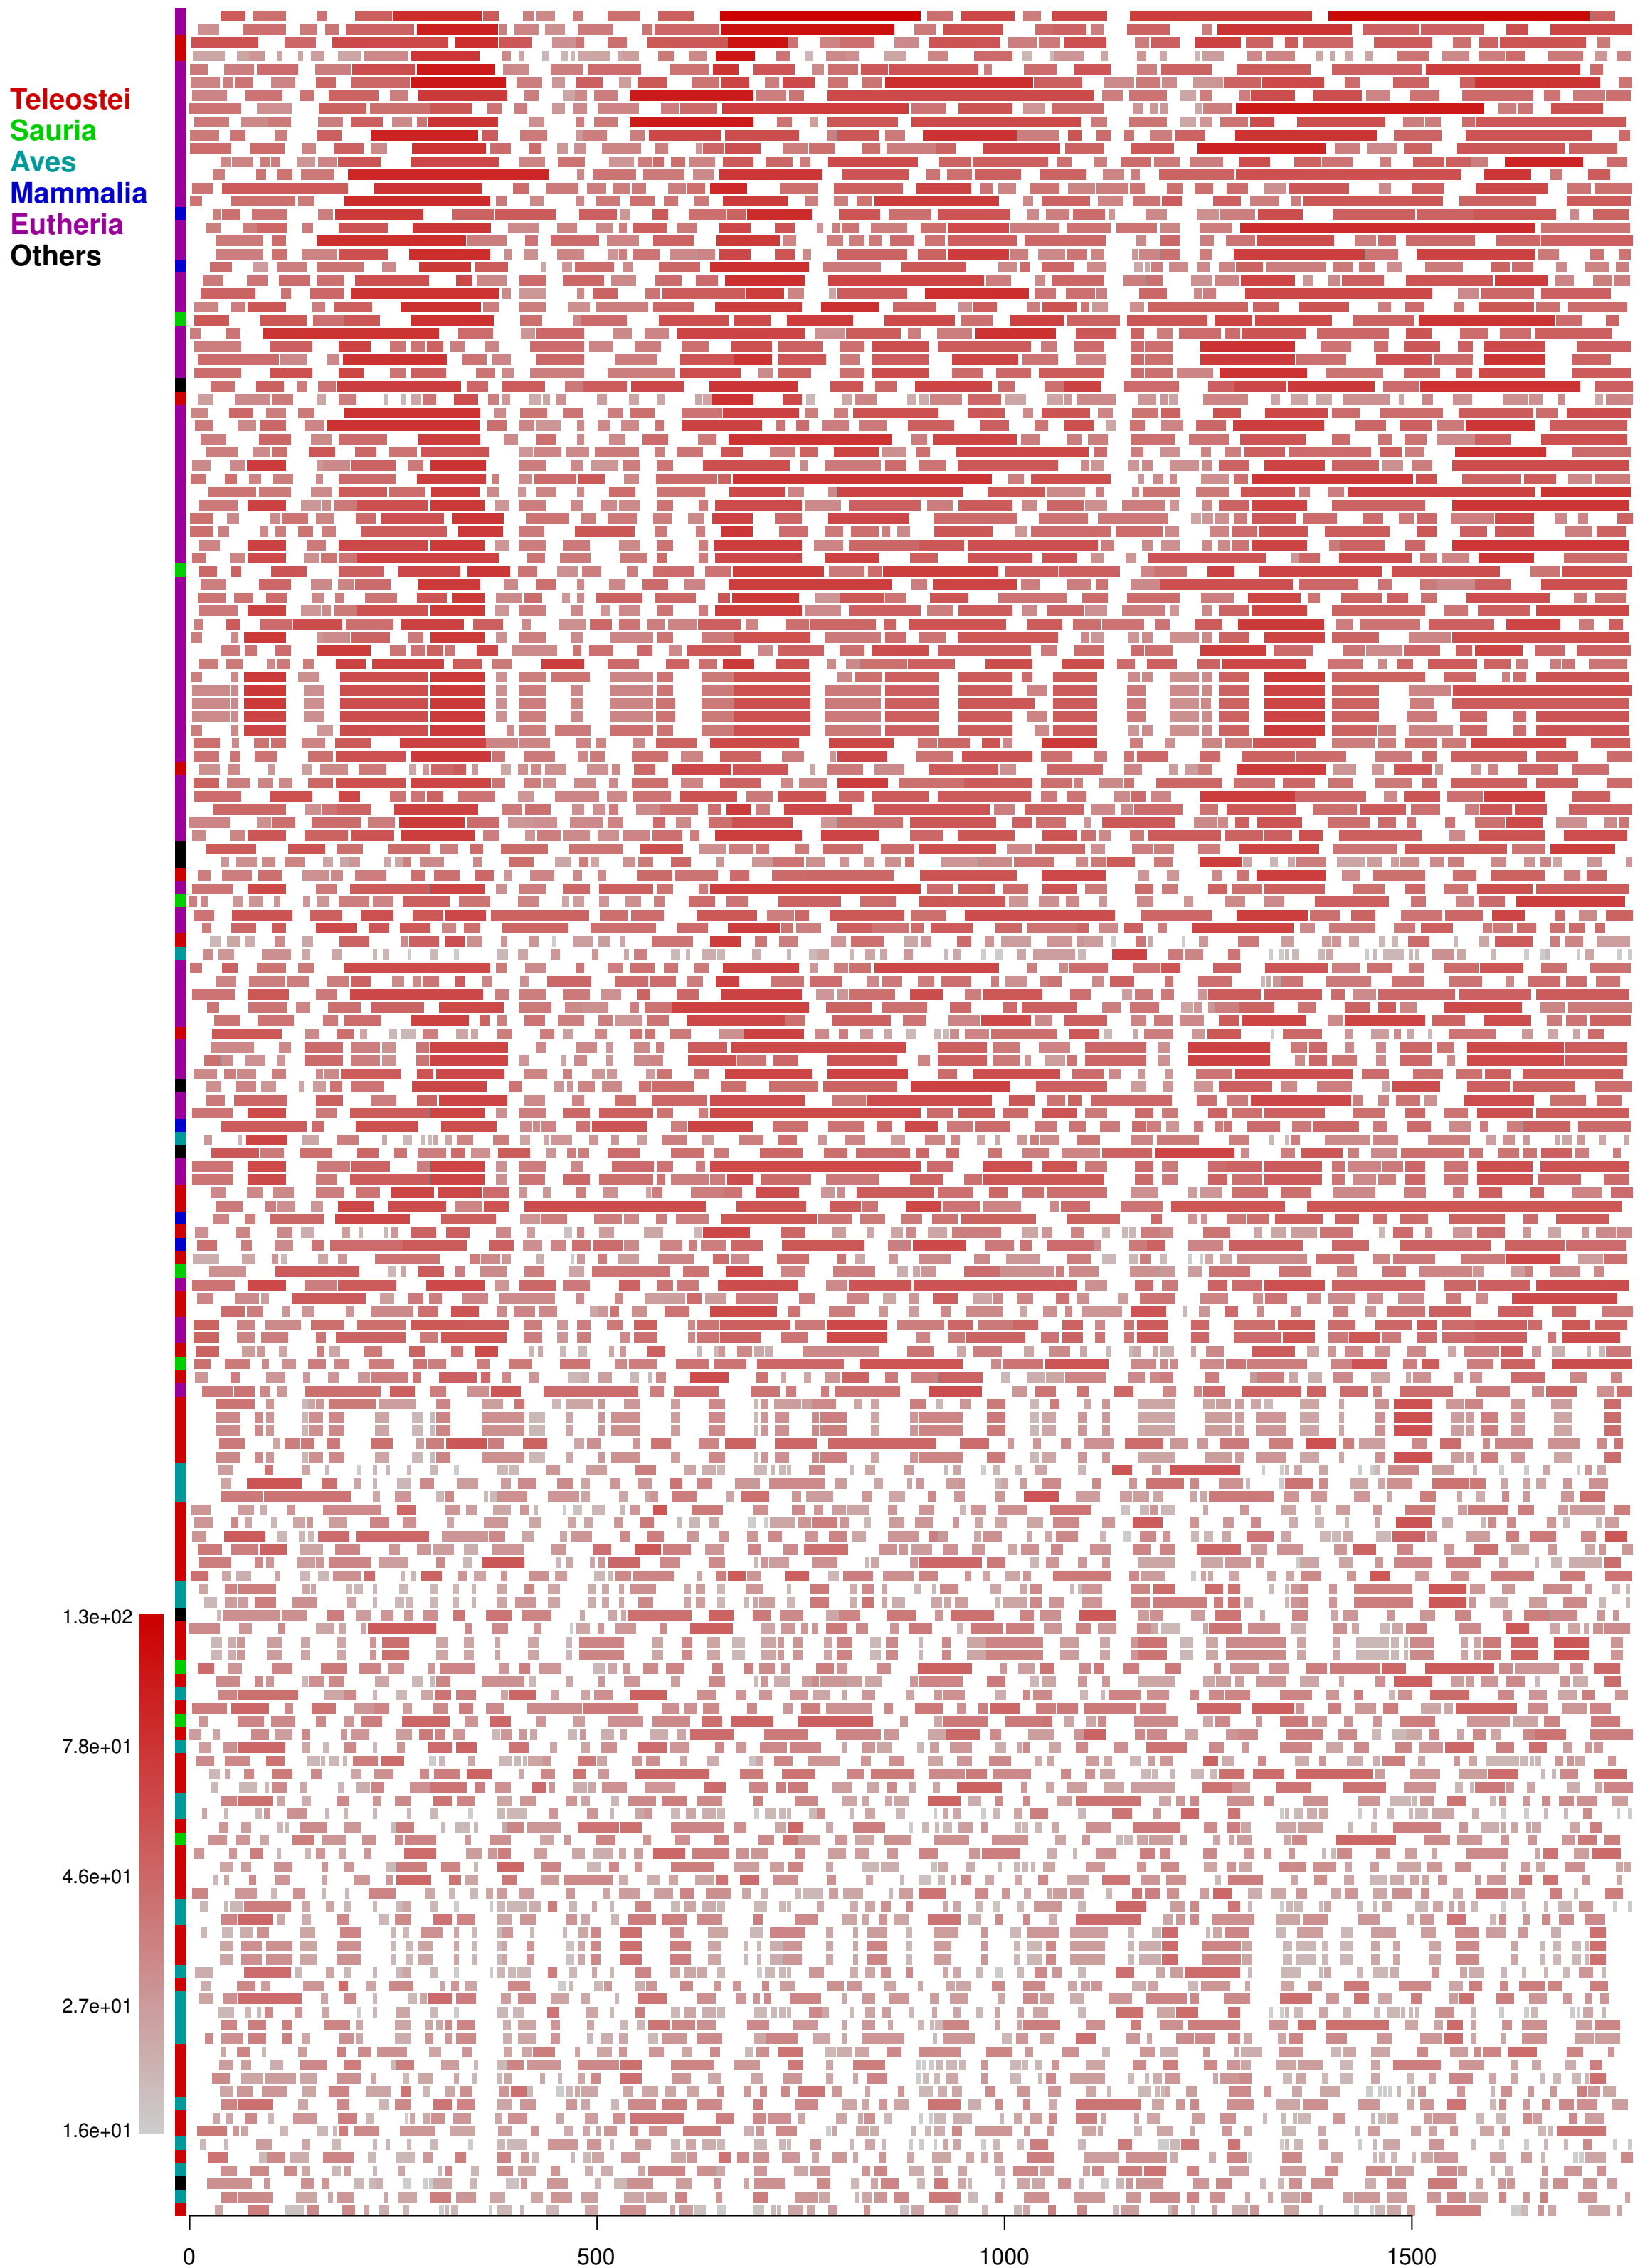

0 alignments above max size (1.0e+08)

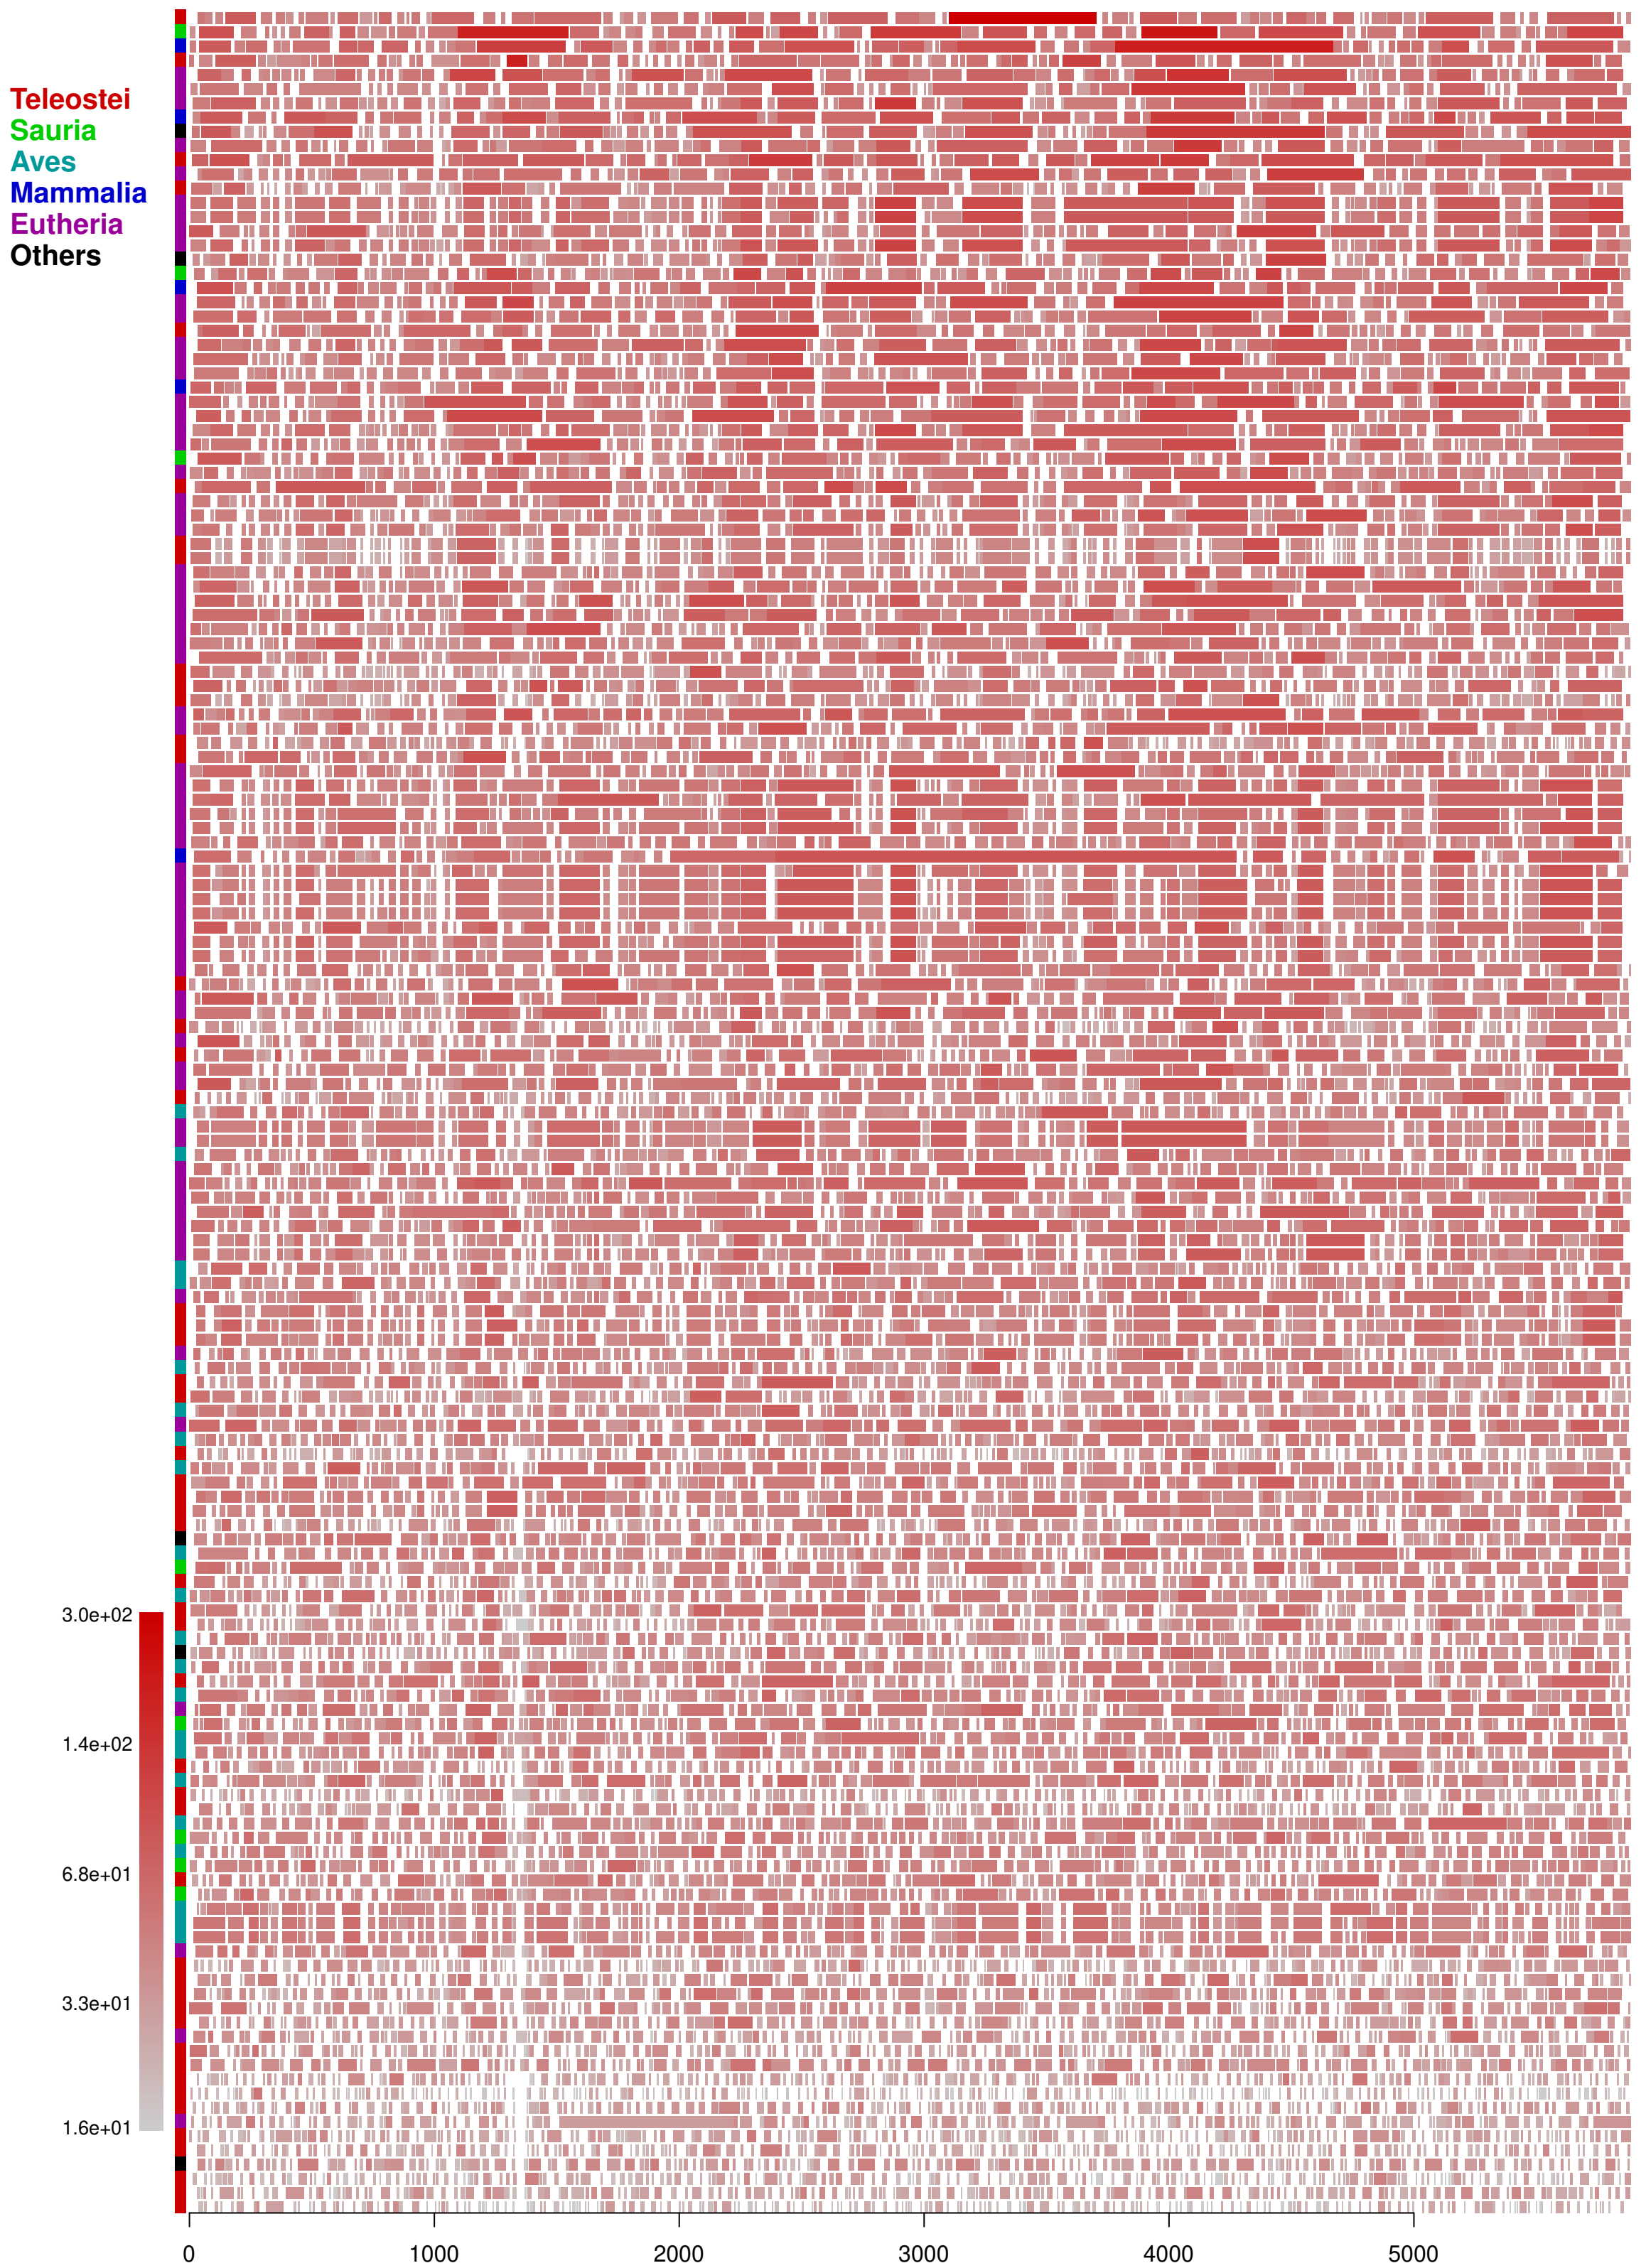

0 alignments above max size (1.0e+08)



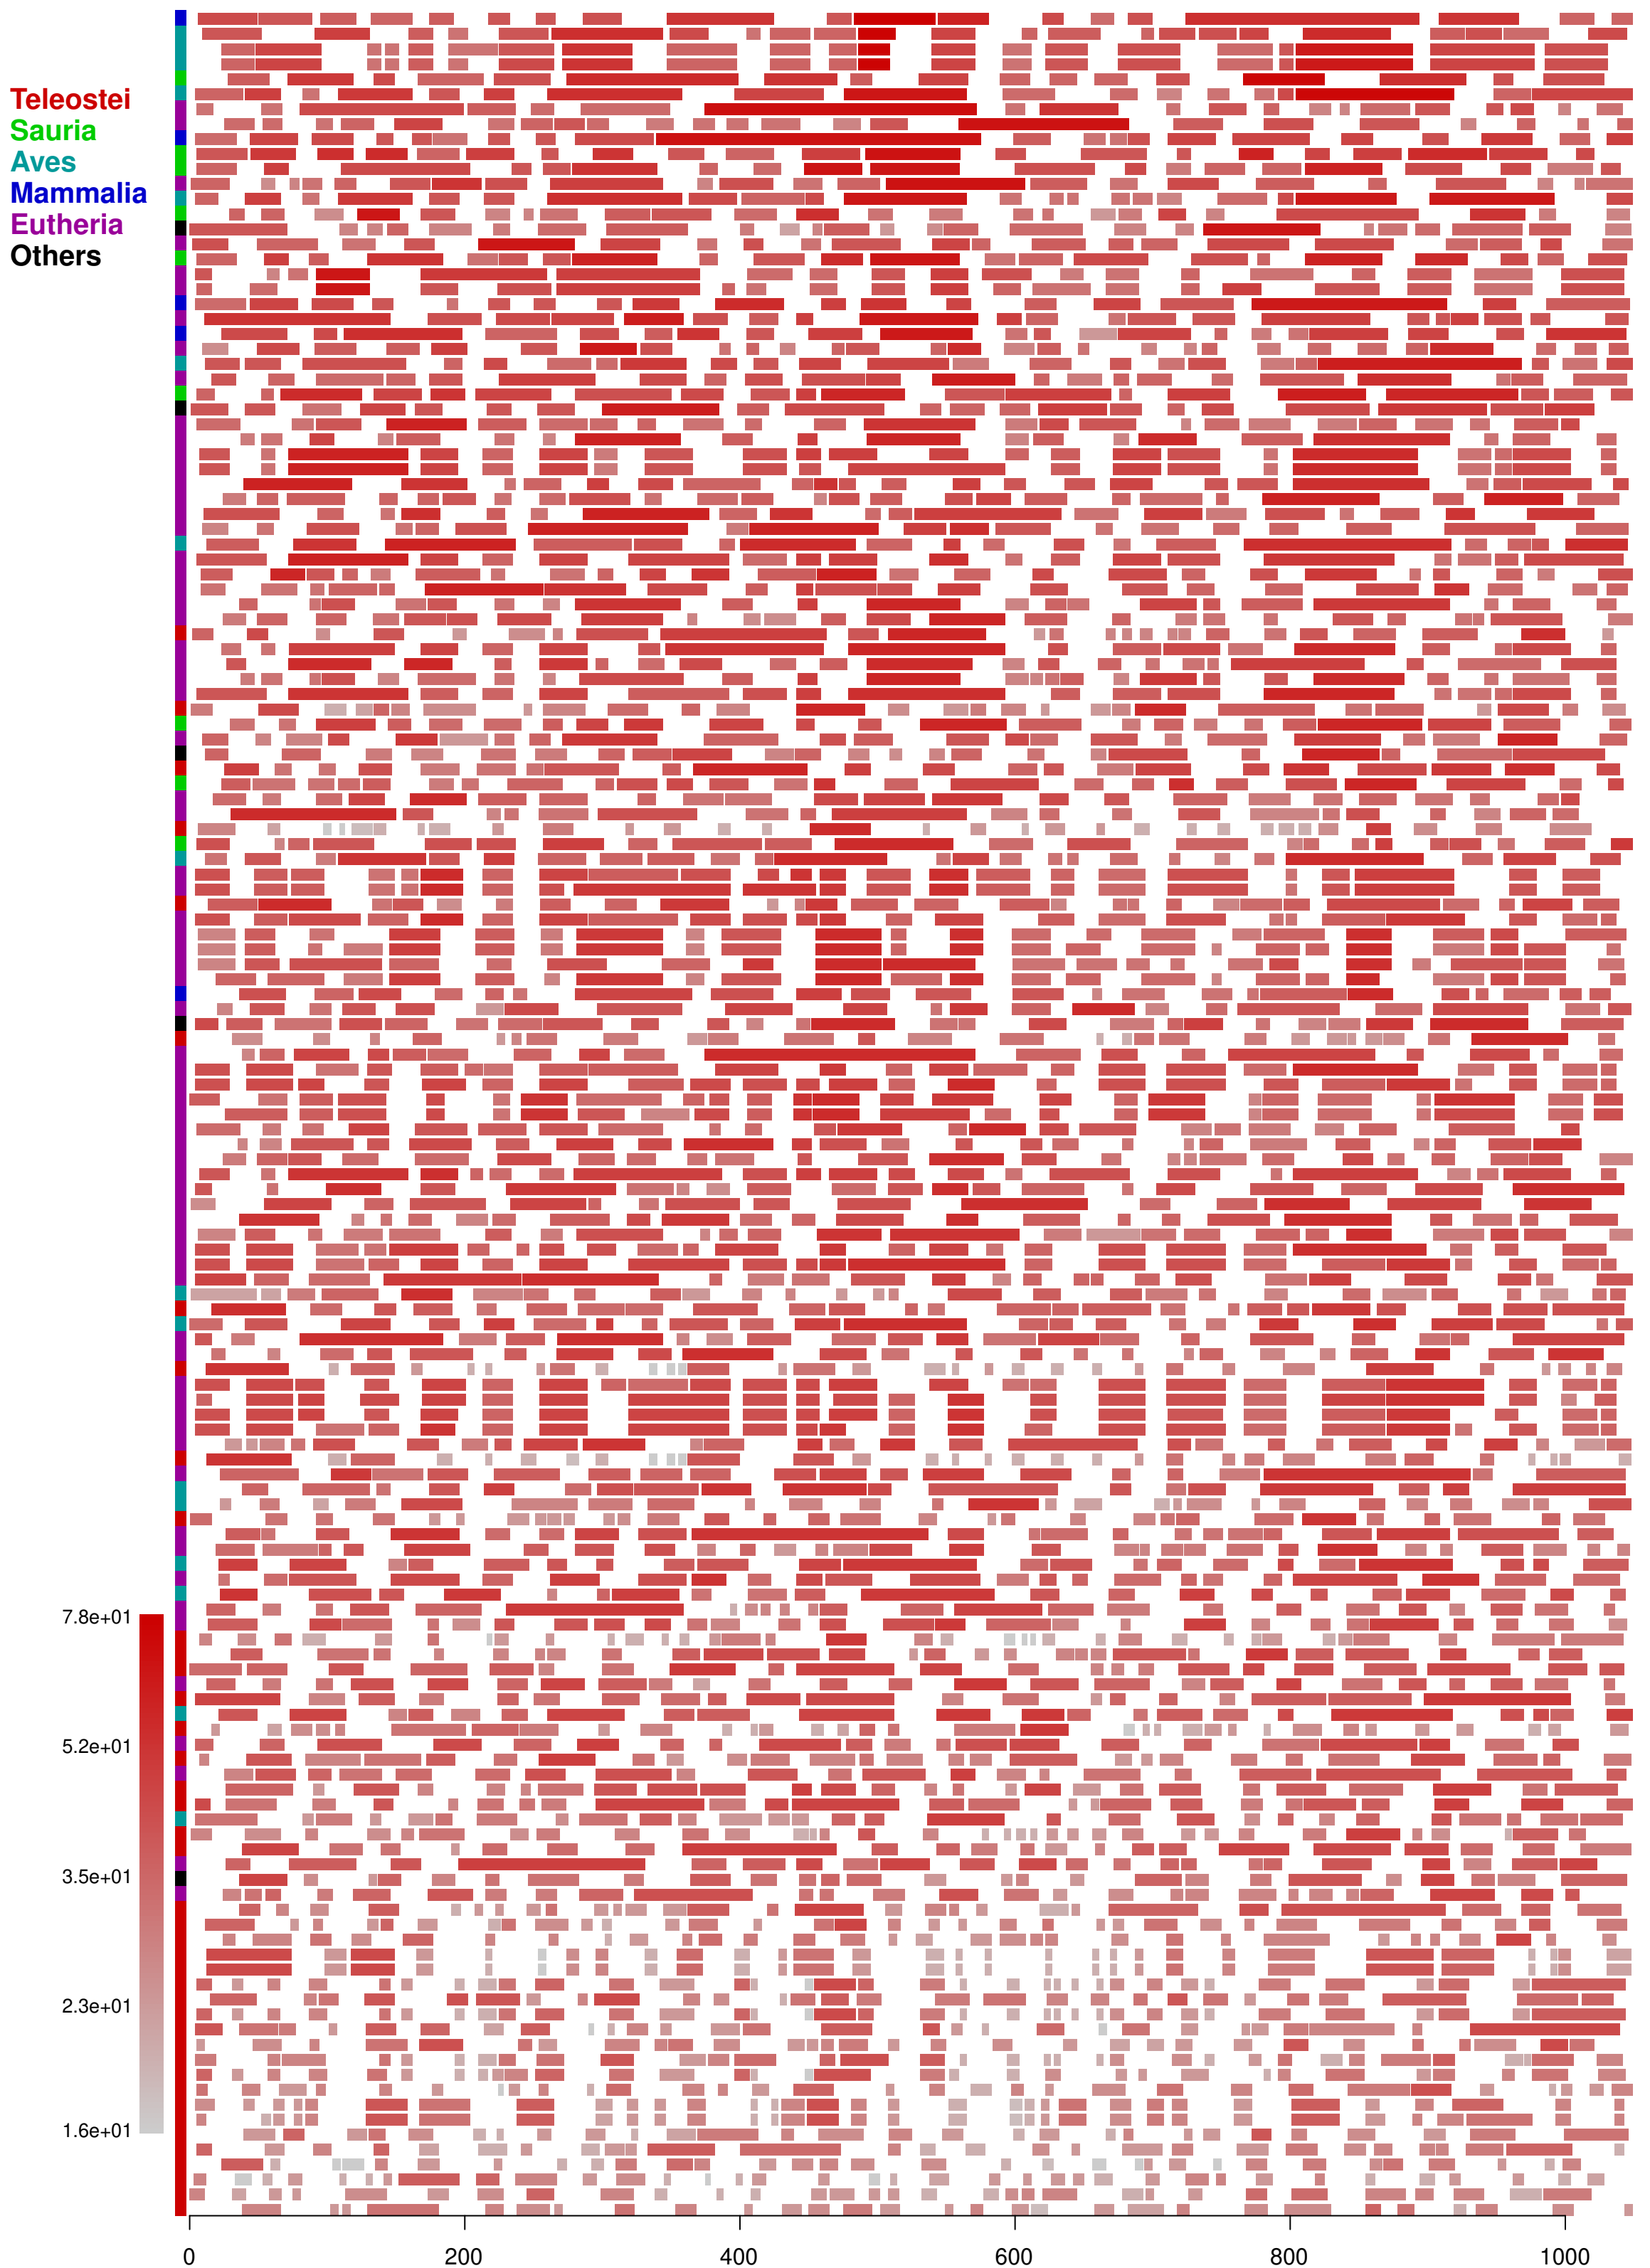

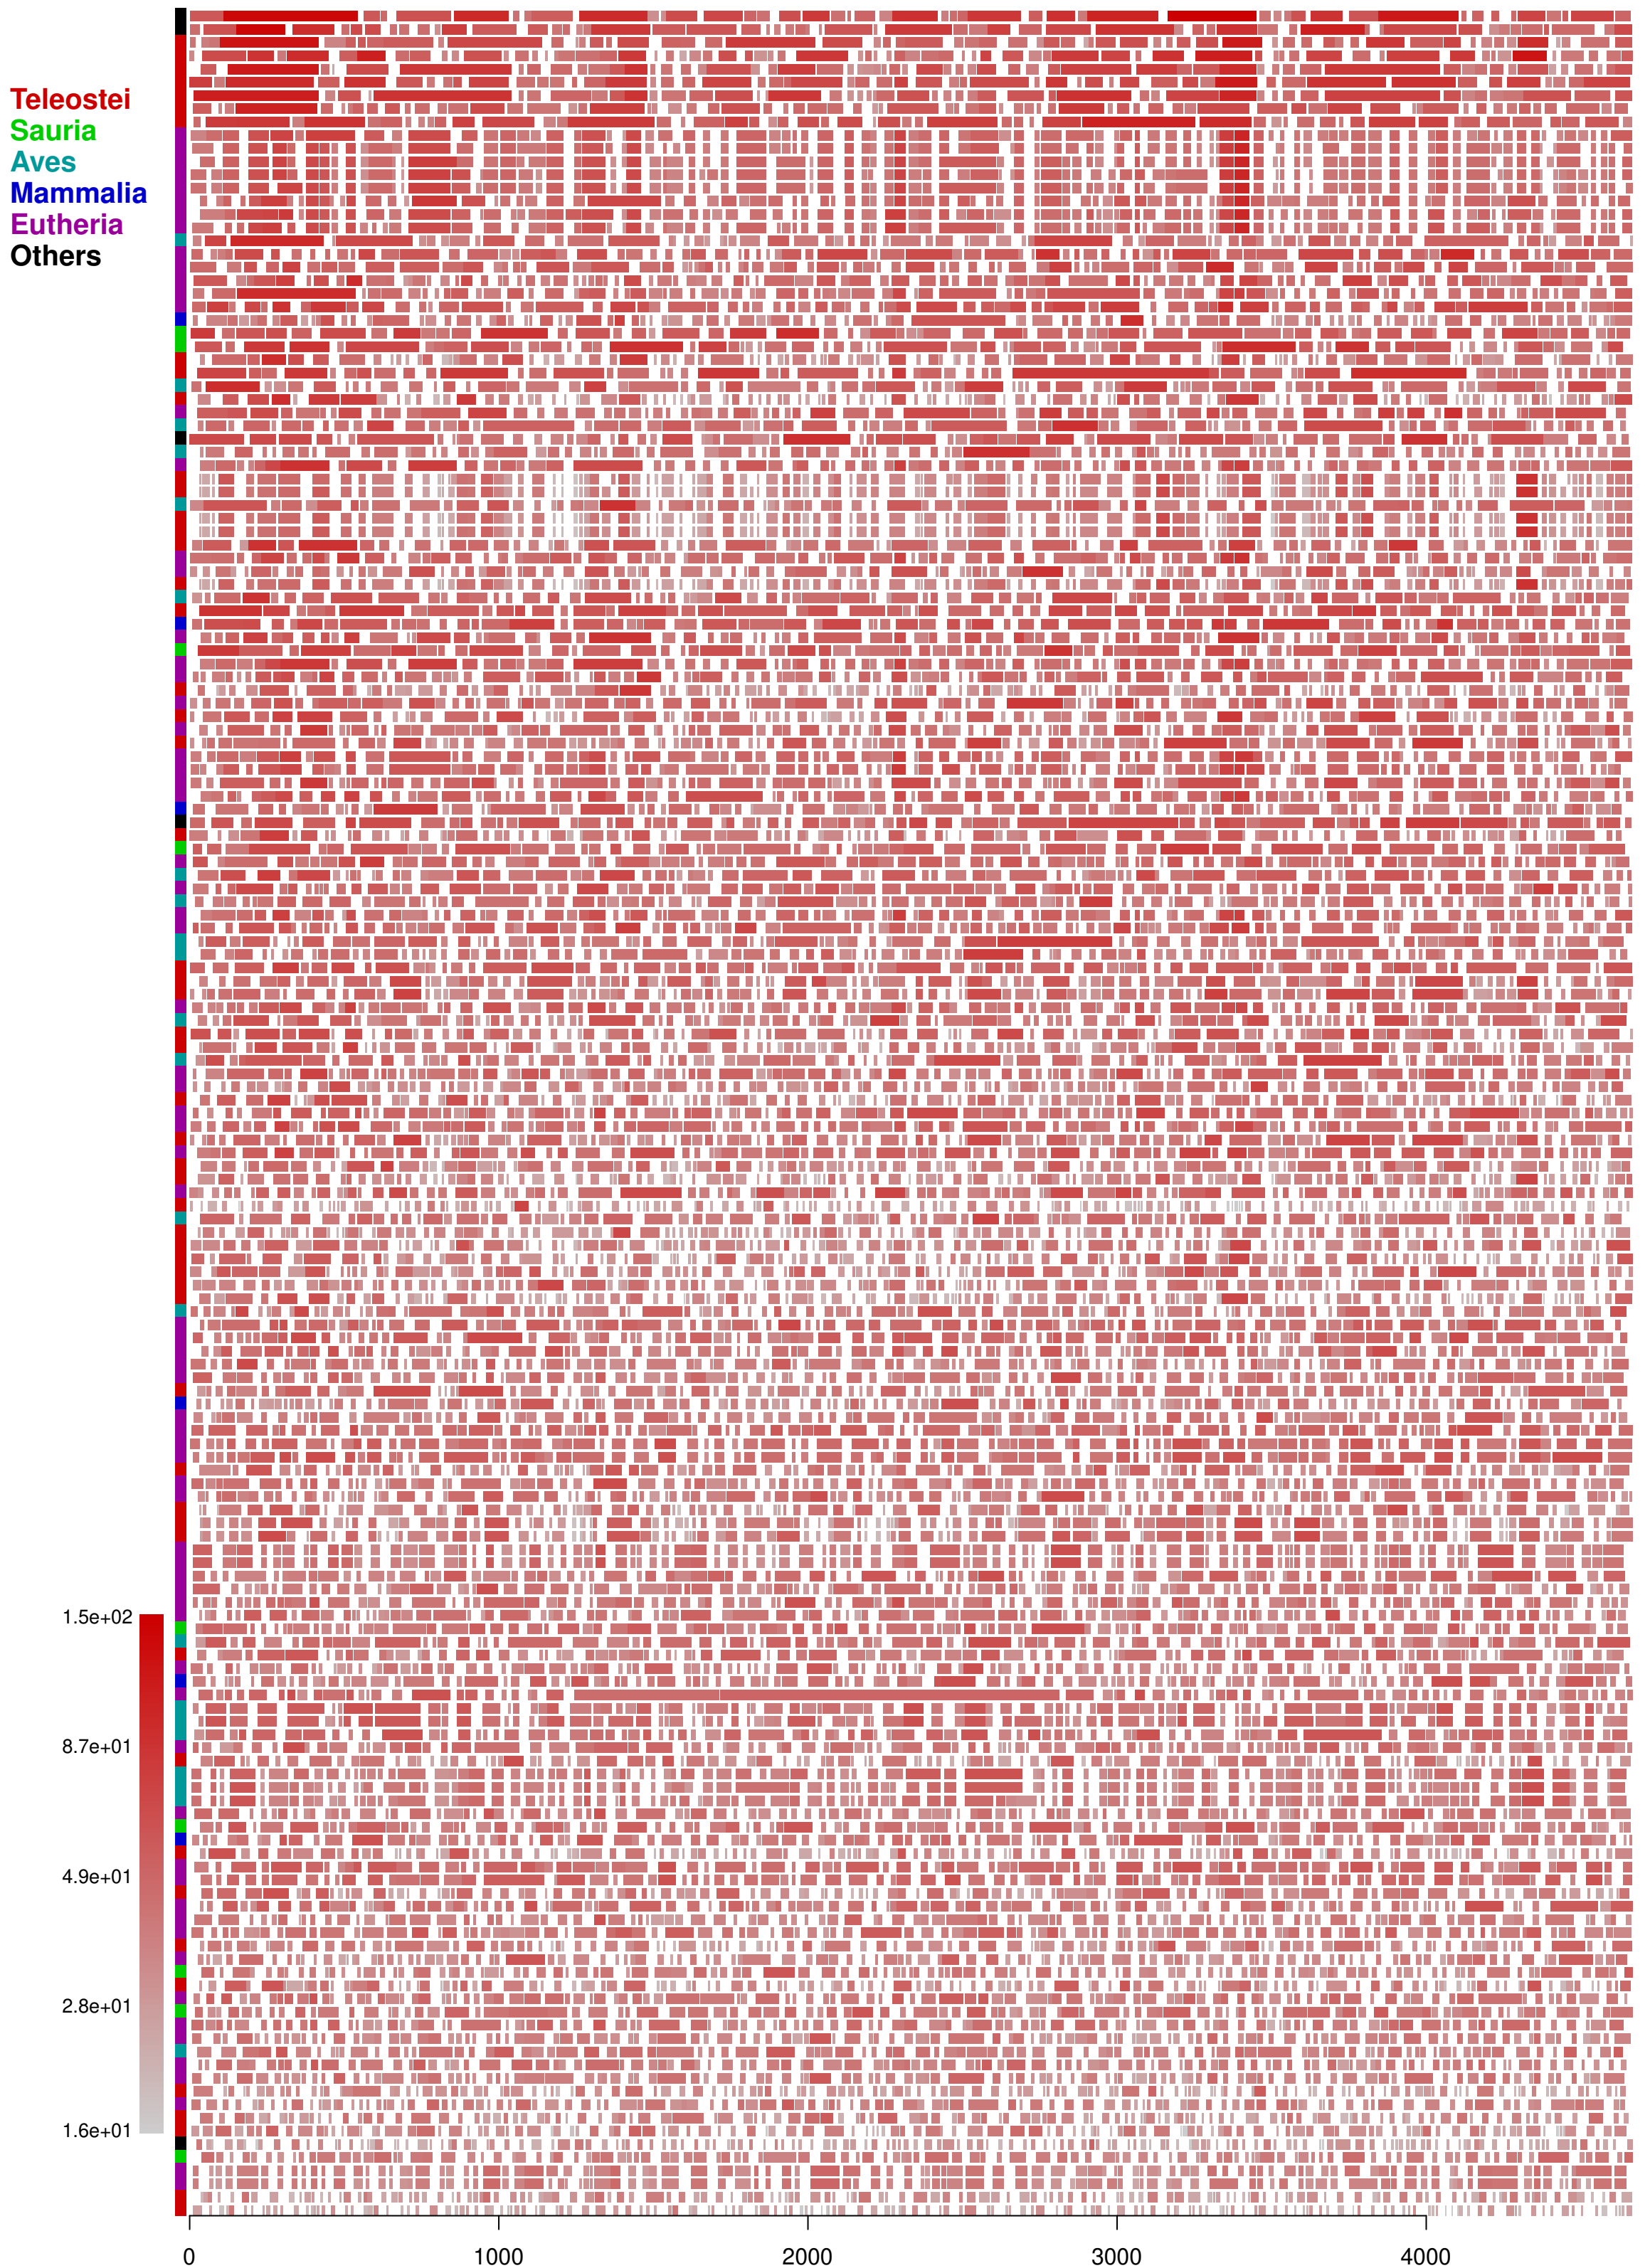

0 alignments above max size (1.0e+08)
